# Supplementary material for: Comparative Transcriptomics and Metabolomics Analyses of Avicennia marina and Kandelia obovata under Chilling Stress during Seedling Stage
Source: MDPI journal article supplement (doi:10.3390/ijms242316989), 2023-11-30
Supplement: s1 [file s1]

---

**Table S1 Primers for qRT-PCR**

| Gene Name<br>基因名称  | Primer Sequence(5'→3')<br>引物序列 (5'→3') |
|--------------------|----------------------------------------|
| <i>AmActin</i> -F  | AGATGGCAGAAGCTGAGGA                    |
| <i>AmActin</i> -R  | CCATGCCAACCATCACACC                    |
| <i>Ko-GAPDH</i> -F | TCGTCCAGGTCTCCAAG                      |
| <i>Ko-GAPDH</i> -R | AGCCAGATCCACCACTC                      |
