# Supplementary material for: Comparative Transcriptomics and Metabolomics Analyses of Avicennia marina and Kandelia obovata under Chilling Stress during Seedling Stage
Source: MDPI journal article supplement (doi:10.3390/ijms242316989), 2023-11-30
Supplement: s1 [file s1]

---

**Table S2 Overview table of transcription sequencing quality**

| Sample  | Valid_Bases | Valid% | Q20%  | Q30%  | GC%   |
|---------|-------------|--------|-------|-------|-------|
| Am_CK_1 | 5.63Gb      | 97.93  | 98.14 | 94.28 | 46.66 |
| Am_CK_2 | 5.56Gb      | 97.95  | 98.17 | 94.40 | 47.48 |
| Am_CK_3 | 5.83Gb      | 98.09  | 98.17 | 94.37 | 46.55 |
| Am_CK_4 | 5.79Gb      | 98.18  | 98.19 | 94.44 | 46.23 |
| Am_CK_5 | 5.69Gb      | 97.24  | 97.97 | 93.86 | 46.31 |
| Am_CK_6 | 6.36Gb      | 97.86  | 97.98 | 93.88 | 46.09 |
| Am_CS_1 | 5.91Gb      | 96.97  | 97.87 | 93.64 | 47.61 |
| Am_CS_2 | 6.16Gb      | 97.24  | 97.96 | 93.88 | 49.35 |
| Am_CS_3 | 5.71Gb      | 96.77  | 97.88 | 93.73 | 50.63 |
| Am_CS_4 | 6.46Gb      | 97.34  | 97.95 | 93.81 | 46.69 |
| Am_CS_5 | 6.38Gb      | 97.61  | 97.90 | 93.70 | 47.55 |
| Am_CS_6 | 5.93Gb      | 96.86  | 97.92 | 93.77 | 47.21 |
| Ko_CK_1 | 5.61Gb      | 97.98  | 97.95 | 93.83 | 45.84 |
| Ko_CK_2 | 5.84Gb      | 98.00  | 97.98 | 93.91 | 45.80 |
| Ko_CK_3 | 5.97Gb      | 97.97  | 97.92 | 93.73 | 45.58 |
| Ko_CK_4 | 6.20Gb      | 98.07  | 97.98 | 93.88 | 45.66 |
| Ko_CK_5 | 6.09Gb      | 98.03  | 97.94 | 93.77 | 45.74 |
| Ko_CK_6 | 6.20Gb      | 98.02  | 97.98 | 93.88 | 45.74 |
| Ko_CS_1 | 6.10Gb      | 97.98  | 97.88 | 93.66 | 45.85 |
| Ko_CS_2 | 5.97Gb      | 97.92  | 97.91 | 93.75 | 45.70 |
| Ko_CS_3 | 5.93Gb      | 98.10  | 98.02 | 94.05 | 45.91 |
| Ko_CS_4 | 5.50Gb      | 98.22  | 98.05 | 94.12 | 46.05 |
| Ko_CS_5 | 6.16Gb      | 98.18  | 97.99 | 93.99 | 46.54 |
| Ko_CS_6 | 5.80Gb      | 98.20  | 98.06 | 94.15 | 46.71 |

---
