# Supplementary material for: Comparative Transcriptomics and Metabolomics Analyses of Avicennia marina and Kandelia obovata under Chilling Stress during Seedling Stage
Source: Int J Mol Sci. 2023 Nov 30;24(23):16989. doi: 10.3390/ijms242316989 (PMC10707264; doi:10.3390/ijms242316989)
Supplement: Supplementary file 1 [file ijms-24-16989-s001.zip]

Archive with 21 entries (21 files):
- Figure S1.tif
- Figure S2a.tif
- Figure S2b.tif
- Figure S3a.tif
- Figure S3b.tif
- Figure S4a.tif
- Figure S4b.tif
- Figure S5a.tif
- Figure S5b.tif
- ijms-2636215-supplementary.pdf
- Table S1.pdf
- Table S10.xlsx
- Table S11.xlsx
- Table S2.pdf
- Table S3.xlsx
- Table S4.xlsx
- Table S5.xlsx
- Table S6.xlsx
- Table S7.xlsx
- Table S8.xlsx
- Table S9.xlsx
