# Supplementary material for: Comparative Transcriptomics and Metabolomics Analyses of Avicennia marina and Kandelia obovata under Chilling Stress during Seedling Stage
Source: Int J Mol Sci. 2023 Nov 30;24(23):16989. doi: 10.3390/ijms242316989 (PMC10707264; doi:10.3390/ijms242316989)
Supplement: Supplementary file 1 [file ijms-24-16989-s001.zip › Table S3.xlsx]

## Sheet: K.obovata
Gene_ID	KOEntry	EC	log2FC	regulation	Name	Annotation	Ko_CS_1_TPM	Ko_CS_2_TPM	Ko_CS_3_TPM	Ko_CS_4_TPM	Ko_CS_5_TPM	Ko_CS_6_TPM	Ko_CK_1_TPM	Ko_CK_2_TPM	Ko_CK_3_TPM	Ko_CK_4_TPM	Ko_CK_5_TPM	Ko_CK_6_TPM	Ko_CS_mean_TPM	Ko_CK_mean_TPM
TRINITY_DN13350_c0_g1	K01803	EC:5.3.1.1	3.6187	up	Tpi1	predicted protein [Hordeum vulgare subsp. vulgare]	0.2	0.17	2.4	2.33	1.28	2.84	0.08	0.04	0.24	0.15	0.32	0.15	1.54	0.16
TRINITY_DN14025_c0_g1	K02437	-	2.02349	up	GDCSH	glycine cleavage system H protein, mitochondrial-like [Coffea arabica]	1.75	1.47	2.36	3.6	2.41	2.58	0.67	0.66	0.33	0.1	0.89	1.9	2.36	0.76
TRINITY_DN14464_c0_g1	K02267	-	2.64236	up	Cox6b1	cytochrome c oxidase subunit 6B-like [Quercus suber]	0.27	0.84	4.25	2.73	4.51	4.27	0	0.54	1.08	0.51	0	1.57	2.81	0.62
TRINITY_DN14756_c0_g1	K08901	-	2.09914	up	PSBQ1	oxygen-evolving enhancer protein 3, chloroplastic-like [Durio zibethinus]	4.99	3	6.5	7.19	6.35	5.59	1.56	1.75	0.86	0.69	3.01	2.44	5.6	1.72
TRINITY_DN15327_c0_g1	K13065	EC:2.3.1.133	-4.54874	down	HST	shikimate O-hydroxycinnamoyltransferase [Populus trichocarpa]	0	0	0.06	0	0.12	0.07	0.96	1.9	0.73	6.46	0.68	1.38	0.04	2.02
TRINITY_DN15380_c0_g2	K02981	-	1.24366	up	Rps2	40S ribosomal protein S2-like [Physcomitrella patens]	1.21	2.02	5.33	5.68	5.86	6	1.66	1.15	2.2	3.21	2.86	3.7	4.35	2.46
TRINITY_DN15394_c0_g1	K14376	EC:2.7.7.19	2.11429	up	-	hypothetical protein JCGZ_23206 [Jatropha curcas]	4.13	2.71	5.79	2.3	4.77	4.68	0.42	1.38	1.51	1.05	0.82	2.4	4.06	1.26
TRINITY_DN15612_c0_g1	K08081	EC:1.1.1.206	8.27325	up	Cbr2	Gluconate 5-dehydrogenase [Auxenochlorella protothecoides]	0	0	6.67	7.03	5.52	6.54	0	0	0.06	0	0	0	4.29	0.01
TRINITY_DN16616_c0_g2	K02971	-	1.3289	up	Rps21	40S ribosomal protein S21 [Quercus suber]	6.19	9.26	23.98	10.98	13.21	14.65	4.24	3.47	8.3	5.88	9.71	10.61	13.04	7.04
TRINITY_DN18296_c0_g1	K01051	EC:3.1.1.11	7.27213	up	PME29	hypothetical protein POPTR_017G054700 [Populus trichocarpa]	9.35	4.86	20.26	4.75	6.87	8.82	0	0	0.11	0.05	0.05	0.21	9.15	0.07
TRINITY_DN2019_c0_g1	K09841	EC:1.1.1.288	-1.1954	down	HSD2	11-beta-hydroxysteroid dehydrogenase-like 4A isoform X1 [Hevea brasiliensis]	0.94	0.69	1.08	0.17	2.22	1.19	3.51	2.73	3.57	4.26	1.66	3.13	1.05	3.14
TRINITY_DN20340_c0_g1	K02721	-	1.85208	up	PSBW	photosystem II reaction center W protein, chloroplastic [Sesamum indicum]	3.49	1.7	3.97	4.39	4.34	3.37	0.81	1.51	0.62	0.59	1.57	2.64	3.54	1.29
TRINITY_DN20488_c0_g1	K07901	-	6.45639	up	Rab3a	PREDICTED: ras-related protein RABE1c-like [Nelumbo nucifera]	0.09	0.09	1.64	1.63	0.98	1.42	0	0.09	0	0	0	0	0.97	0.01
TRINITY_DN20915_c0_g1	K00016	EC:1.1.1.27	4.76385	up	Ldhb	L-lactate dehydrogenase B-like [Physcomitrella patens]	0	0	1.31	1.07	1.26	1.26	0	0	0	0	0.08	0.12	0.82	0.03
TRINITY_DN2147_c0_g1	K13065	EC:2.3.1.133	-3.01084	down	ACT	vinorine synthase-like [Hevea brasiliensis]	0.54	0.46	0.38	0.79	0.63	0.39	9.17	9.94	3.17	4.38	2.13	3.75	0.53	5.42
TRINITY_DN21603_c0_g2	K02969	-	1.24046	up	RPS20	predicted protein [Hordeum vulgare subsp. vulgare]	1.69	5.75	5.85	7.36	7.69	9.51	1.95	0.96	4.34	2.3	5.54	7.02	6.31	3.69
TRINITY_DN21604_c0_g2	K12183	-	3.17237	up	ELCL	protein ELC-like [Hevea brasiliensis]	2.56	2.01	3.03	2.6	6.83	2.56	0.12	0.31	0.58	0.63	0.65	0.52	3.27	0.47
TRINITY_DN22789_c0_g2	K02882	-	1.38922	up	Rpl18a	predicted protein [Hordeum vulgare subsp. vulgare]	1.01	5.07	6.74	6.61	6.16	5.87	0.88	0.87	2.3	2.06	5.16	5.02	5.24	2.71
TRINITY_DN23051_c0_g2	K02903	-	1.52387	up	Rpl28	hypothetical protein AXG93_1712s1510 [Marchantia polymorpha subsp. ruderalis]	1.24	4.62	7.16	7.06	6.8	9.3	1.75	0.49	2.23	2.6	4.21	6.26	6.03	2.92
TRINITY_DN23404_c0_g1	K02693	-	2.48394	up	PSAE-1	photosystem I reaction center subunit IV B, chloroplastic [Sesamum indicum]	1.9	1.3	3.08	5.46	2.48	3.32	0.35	1.38	0.23	0	0.95	1.33	2.92	0.71
TRINITY_DN23478_c0_g1	K02984	-	1.34864	up	Rps3a	ribosomal protein S3a [Chlamydomonas reinhardtii]	1.17	4.69	6.93	6	7.14	6.95	1.12	0.86	3.18	3.06	4.65	4.38	5.48	2.88
TRINITY_DN24223_c0_g1	K08967	EC:1.13.11.53 1.13.11.54	2.42824	up	ARD4	1,2-dihydroxy-3-keto-5-methylthiopentene dioxygenase 1 isoform 2 [Solanum lycopersicum]	0.4	0.38	1.13	1.12	0.27	0.62	0	0.17	0.17	0	0.11	0.5	0.65	0.16
TRINITY_DN24328_c0_g2	K02912	-	1.55968	up	RPL32	hypothetical protein M569_01958 [Genlisea aurea]	2.14	4.99	9.94	8.41	12.74	11.49	2.7	1.86	2.68	3.56	4.01	8.83	8.29	3.94
TRINITY_DN24392_c0_g1	K02901	-	1.64067	up	RPL27	PREDICTED: 60S ribosomal protein L27-3 [Beta vulgaris subsp. vulgaris]	0.68	2.84	8.88	9.35	11.12	8.9	0.69	1.02	3.43	2.93	8.24	2.66	6.96	3.16
TRINITY_DN24393_c0_g2	K02966	-	1.5566	up	Rps19	hypothetical protein CBR_g21828 [Chara braunii]	0.73	6.6	8.45	5.49	7.16	10.35	2.23	1.22	2.94	1.64	5.14	5	6.46	3.03
TRINITY_DN24591_c0_g1	K17879	EC:3.6.1.-	-3.24704	down	NUDT15	nudix hydrolase 11 isoform X2 [Populus trichocarpa]	0	0.96	0.28	0.31	0	0	3.34	2.69	4.48	2.38	2.12	3.36	0.26	3.06
TRINITY_DN24829_c0_g1	K00052	EC:1.1.1.85	5.07516	up	-	uncharacterized protein LOC110620280 [Manihot esculenta]	15.32	5.57	9.05	8.85	7.14	9.91	0.17	1.07	0.32	0.08	0.4	0.08	9.31	0.35
TRINITY_DN26022_c0_g1	K04565	EC:1.15.1.1	1.88008	up	Sod1	copper/zinc superoxide dismutase [Klebsormidium nitens]	0.27	0.56	3.52	3.13	2.98	1.99	0	0.41	0.68	1.56	0.95	1.06	2.07	0.78
TRINITY_DN2620_c0_g1	K00799	EC:2.5.1.18	8.77424	up	Gsto1	glutathione S-transferase U8-like [Ziziphus jujuba]	0	0	22.2	23.03	18.41	20.49	0.11	0.11	0	0	0	0	14.02	0.04
TRINITY_DN26852_c0_g3	K02155	-	2.92324	up	Atp6v0c	unknown [Lotus japonicus]	0.05	0.46	2.41	2.06	1.76	2.04	0.1	0.1	0.29	0.33	0.15	0.57	1.46	0.26
TRINITY_DN27156_c0_g1	K01951	EC:6.3.5.2	6.19264	up	At5g51310	gibberellin 20-oxidase-like protein [Manihot esculenta]	2.28	0.25	5.34	1.74	0.58	1.83	0	0	0.09	0.09	0	0	2	0.03
TRINITY_DN27284_c0_g1	K00799	EC:2.5.1.18	6.84179	up	HSP26-A	glutathione S-transferase protein [Bruguiera gymnorhiza]	14.17	9.64	20.11	4.48	7.65	4.29	0.11	0	0	0.1	0.41	0	10.06	0.1
TRINITY_DN27638_c0_g1	K01870	EC:6.1.1.5	8.29533	up	DIR23	dirigent protein 22 [Jatropha curcas]	530.11	186.63	1537.85	390.55	172.63	408.82	3.32	1.81	2.86	1.98	1.96	2.09	537.77	2.34
TRINITY_DN27934_c0_g1	K08341	-	3.47417	up	GABARAPL1	autophagy-related protein 8C-like [Chenopodium quinoa]	0.13	0.13	1.17	1.37	1.05	1.43	0.28	0.27	0.42	0.15	0.21	0.2	0.88	0.25
TRINITY_DN28176_c0_g2	K02958	-	1.39806	up	RPS15	PREDICTED: 40S ribosomal protein S15-like [Musa acuminata subsp. malaccensis]	3.06	8.38	11.14	13.56	10.81	13.27	3.1	2.77	3.35	4.51	6.97	11.11	10.04	5.3
TRINITY_DN28460_c0_g1	K02303	EC:2.1.1.107	-2.97281	down	-	uncharacterized protein LOC110619777 isoform X1 [Manihot esculenta]	0	0.39	0.28	0.31	0.4	0.24	3.02	4.49	1.59	3.07	0.51	3.88	0.27	2.76
TRINITY_DN28571_c0_g1	K06699	-	-1.4376	down	PA200	proteasome activator subunit 4 [Ricinus communis]	5.21	4.27	6.52	2.4	2.05	3.28	18.63	13.93	15.63	18.65	3.15	12.88	3.96	13.81
TRINITY_DN29641_c0_g2	K02918	-	1.23259	up	Rpl35	PREDICTED: 60S ribosomal protein L35 [Elaeis guineensis]	1.21	6.26	7.57	7.04	10.9	10.41	3.05	1.2	5.15	3.17	5.75	7.34	7.23	4.28
TRINITY_DN29726_c0_g1	K02937	-	1.48587	up	Rpl7	hypothetical protein SELMODRAFT_103994 [Selaginella moellendorffii]	0.87	2.68	5.99	5.77	4.78	5.05	0.59	0.87	1.93	2	3.14	3.55	4.19	2.01
TRINITY_DN30618_c0_g1	K14416	-	5.02776	up	FPF1	flowering-promoting factor 1-like protein 3 [Jatropha curcas]	5.39	3.84	0.36	1.28	8.18	26.35	0.48	0.47	0	0.18	0.46	0.18	7.57	0.29
TRINITY_DN31507_c0_g2	K13356	EC:1.2.1.84	2.28632	up	STR9	Rhodanese-related sulfurtransferase [Handroanthus impetiginosus]	0.44	0.36	0.92	1.06	0.54	0.38	0.04	0.18	0.13	0.08	0.22	0.34	0.62	0.17
TRINITY_DN31556_c0_g2	K02934	-	1.51997	up	Rpl6	hypothetical protein CBR_g20098 [Chara braunii]	0.84	2.15	4.83	2.71	3.71	3.98	0.47	0.52	0.97	1.05	2.57	2.95	3.04	1.42
TRINITY_DN31584_c0_g2	K00799	EC:2.5.1.18	1.55221	up	Gstp1	hypothetical protein CHLNCDRAFT_142000 [Chlorella variabilis]	0.8	0.52	2.7	2.21	2.67	2.27	0.51	0	0.89	1.24	0.89	1.64	1.86	0.86
TRINITY_DN31840_c0_g2	K02951	-	1.26767	up	RPS12	unknown [Picea sitchensis]	0.76	5.29	15.68	12.18	15.11	11.95	3.87	1.52	9.44	3.65	8.16	9.17	10.16	5.97
TRINITY_DN32274_c0_g2	K02983	-	1.35418	up	Fau	40S ribosomal protein S30 [Tetrabaena socialis]	0.68	3.06	5.09	4.63	6.46	5.99	0.46	0.23	1.82	3.03	3.4	5.29	4.32	2.37
TRINITY_DN32298_c0_g1	K00815	EC:2.6.1.5	1.46248	up	naat-A	hypothetical protein MIMGU_mgv1a006516mg [Erythranthe guttata]	0.23	0.36	0.58	0.44	0.39	0.27	0.12	0.18	0.03	0.06	0.17	0.51	0.38	0.18
TRINITY_DN32406_c0_g2	K02995	-	1.39917	up	RPS8	predicted protein [Hordeum vulgare subsp. vulgare]	0.97	3.23	7.8	5.91	5.66	6.89	1.21	0.86	2.78	2.57	3.63	4.69	5.08	2.62
TRINITY_DN32533_c0_g1	K01176	EC:3.2.1.1	2.90587	up	AMY3	PREDICTED: alpha-amylase 3, chloroplastic-like isoform X6 [Gossypium raimondii]	6.38	6.2	4.44	7.68	6.66	7.04	0.8	1.98	0	1.52	0	2.32	6.4	1.1
TRINITY_DN32856_c0_g1	K06699	-	-1.31817	down	PA200	Proteasome activator subunit 4 [Vitis vinifera]	10.96	10.61	9.09	9.18	10.36	7.09	19.23	32.68	30.48	37.87	37.51	35.28	9.55	32.17
TRINITY_DN32901_c0_g1	K02639	-	8.40086	up	SEND33	PREDICTED: ferredoxin [Nicotiana sylvestris]	0	0	23.45	0	13.62	0	0	0	0	0	0	0	6.18	0
TRINITY_DN33313_c0_g2	K16223	-	7.09461	up	FT	PREDICTED: protein HEADING DATE 3A [Nelumbo nucifera]	27.04	20.89	15.4	22.26	12.89	16.88	0.5	0	0.16	0	0.16	0.16	19.23	0.16
TRINITY_DN33397_c0_g1	K05674	-	-1.46474	down	ABCC13	PREDICTED: ABC transporter C family member 13 isoform X1 [Populus euphratica]	9.71	4.13	5.4	8.29	6.13	7.02	27.84	37.19	22.98	21.13	21.25	20.42	6.78	25.14
TRINITY_DN34050_c0_g1	K02910	-	1.48185	up	RPL31	uncharacterized protein LOC100306335 [Glycine max]	2.08	7.55	7.72	11.24	11.27	17.71	1.4	2.42	2.44	5.28	8	9.44	9.6	4.83
TRINITY_DN34146_c0_g1	K14332	-	7.36554	up	PSAO	PREDICTED: photosystem I subunit O-like isoform X1 [Nicotiana sylvestris]	0	0	14.02	0	8.8	0	0	0	0	0	0	0	3.8	0
TRINITY_DN34148_c0_g1	K01092	EC:3.1.3.25	6.95797	up	CURT1A	PREDICTED: protein CURVATURE THYLAKOID 1A, chloroplastic [Nicotiana attenuata]	0	0	5.72	0	4.23	0	0	0	0	0	0	0	1.66	0
TRINITY_DN34217_c0_g1	K12121	-	-2.20603	down	PHYB	hypothetical protein CCACVL1_28594 [Corchorus capsularis]	2.71	2.99	4.17	2.79	2.2	0.35	20.83	19.02	15.22	12.29	9.29	14.56	2.53	15.2
TRINITY_DN34258_c1_g1	K00025	EC:1.1.1.37	2.54538	up	Mdh1	malate dehydrogenase 1, cytoplasmic [Capsella rubella]	0.57	0.82	2.63	2.02	2.13	2.53	0.71	0.44	0.39	0.79	1.16	1.48	1.78	0.83
TRINITY_DN34329_c0_g4	K02692	-	2.21918	up	psaD	photosystem I reaction center subunit II, chloroplastic-like [Sesamum indicum]	1.48	1.71	2.87	2.95	2.42	3.45	1.16	0.96	0.17	0.08	0.6	1.17	2.48	0.69
TRINITY_DN34357_c0_g1	K02885	-	1.39963	up	RPL19	PREDICTED: 60S ribosomal protein L19-3 [Beta vulgaris subsp. vulgaris]	0.74	3.6	5.4	5.56	7.2	6.2	1.4	1.48	1.47	1.91	3.66	4.69	4.78	2.44
TRINITY_DN34372_c0_g1	K02132	-	2.89519	up	Atp5a1	ATP synthase subunit alpha, mitochondrial-like [Quercus suber]	0.06	0.48	1.62	1.89	1.64	1.8	0.15	0.11	0.25	0.22	0.33	0.24	1.25	0.22
TRINITY_DN34372_c0_g2	K02873	-	1.70366	up	Rpl13	60S ribosomal protein L13-1 isoform X2 [Selaginella moellendorffii]	1.04	3.33	6.12	5.37	5.27	5.32	0.74	0.73	1.75	1.88	3.4	2.41	4.41	1.82
TRINITY_DN34465_c0_g1	K03063	-	1.85826	up	RPT2	root phototropism protein 2-like [Sesamum indicum]	0.36	0.37	0.95	0.83	0.46	0.55	0.18	0.27	0.05	0.02	0.29	0.47	0.59	0.21
TRINITY_DN34509_c0_g1	K02902	-	-1.58389	down	YSL6	YELLOW STRIPE like 6 [Theobroma cacao]	8.59	6.92	14.62	12.18	12.99	8.38	57.66	62.89	46.01	40.88	34.2	56.47	10.61	49.69
TRINITY_DN34553_c0_g2	K02889	-	1.63782	up	RPL21	60S ribosomal protein L21-A-like [Quercus suber]	1.4	5.45	14.66	7.79	9.43	11.35	2.03	0.95	3.32	3.34	6.15	5.95	8.35	3.62
TRINITY_DN34616_c0_g1	K18881	EC:4.2.1.130	2.22517	up	DJ1D	protein DJ-1 homolog D [Sesamum indicum]	0.3	0.31	1.14	0.68	0.46	0.42	0.15	0.04	0.07	0	0.4	0.25	0.55	0.15
TRINITY_DN34643_c0_g1	K01870	EC:6.1.1.5	2.24722	up	DIR23	dirigent protein 23 [Populus trichocarpa]	4.16	0.52	0.56	0.54	3.28	2.15	0	0.14	0.14	0.62	0.43	1.8	1.87	0.52
TRINITY_DN34660_c0_g2	K02993	-	1.46982	up	RPS7	40S ribosomal protein S7-like [Physcomitrella patens]	0.67	3.9	6.31	4.92	7.24	8.11	1.1	0.81	2.54	2.57	4.28	4.03	5.19	2.56
TRINITY_DN34726_c0_g1	K07964	EC:3.2.1.166	4.25721	up	At5g07830	Heparanase-like protein 2 [Vitis vinifera]	26.23	17.11	16.54	11.85	17.22	15.34	0.54	1.3	1.29	1.42	1.2	1.5	17.38	1.21
TRINITY_DN34752_c0_g1	K18875	-	-1.45181	down	SAG101	hypothetical protein POPTR_009G086100 [Populus trichocarpa]	1.16	0.6	0.67	1.34	1.17	1.14	2.25	3.37	4.14	2.1	5.4	4.93	1.01	3.7
TRINITY_DN34854_c0_g1	K08330	-	2.11895	up	ATG11	hypothetical protein MANES_14G113300 [Manihot esculenta]	126.84	77.71	98.43	131.13	81.02	107.4	29.2	33.03	35.16	36.44	16.76	34.35	103.75	30.82
TRINITY_DN34887_c0_g1	K19476	-	1.67776	up	-	Regulator of Vps4 activity in the MVB pathway protein [Theobroma cacao]	4.16	9.56	3.99	4.35	3.62	4.47	0.85	3.72	1.67	2.92	2.39	1.28	5.03	2.14
TRINITY_DN35009_c0_g1	K05643	-	4.9897	up	ABCA1	PREDICTED: ABC transporter A family member 1 isoform X1 [Cucumis melo]	78.86	85.46	39.98	55.54	49.86	72.39	11.8	6.85	2.82	8.13	10.43	7.51	63.68	7.92
TRINITY_DN35011_c0_g1	K02721	-	7.30255	up	PSBW	PREDICTED: photosystem II reaction center W protein, chloroplastic-like [Nicotiana tabacum]	0	0	12.04	0	8.43	0	0	0	0	0	0	0	3.41	0
TRINITY_DN35273_c0_g1	K00284	EC:1.4.7.1	-1.07489	down	GLU1	ferredoxin-dependent glutamate synthase, chloroplastic [Manihot esculenta]	258.22	410.38	334.98	319.64	400.86	329.77	1058.57	1131.37	900.46	982.37	747.99	1005.23	342.31	971
TRINITY_DN35603_c0_g2	K00679	EC:2.3.1.158	2.78489	up	At5g41890	hypothetical protein MANES_01G152800 [Manihot esculenta]	9.31	3.38	23.72	4.36	5.15	4.19	2.22	3.32	1.58	0.84	1.45	1.39	8.35	1.8
TRINITY_DN35618_c0_g1	K12121	-	-2.31177	down	PHYB	phytochrome B [Cinnamomum micranthum f. kanehirae]	3.79	2.46	4.87	4.35	2.52	2.67	31.42	27.86	18.26	23.06	17.77	20.73	3.44	23.18
TRINITY_DN35620_c0_g1	K01051	EC:3.1.1.11	1.71203	up	-	21 kDa protein [Jatropha curcas]	8.48	37.01	5.41	8.3	12.52	11.4	1.74	2.64	3.44	8.1	4.2	11.77	13.85	5.32
TRINITY_DN35655_c0_g2	K02930	-	1.42612	up	Rpl4	predicted protein [Hordeum vulgare subsp. vulgare]	0.61	2.05	4.66	3.82	4.25	5.19	0.78	0.58	1.7	1.24	2.71	3.19	3.43	1.7
TRINITY_DN35735_c0_g2	K05278	EC:1.14.20.6	1.80661	up	ANS	codeine O-demethylase [Sesamum indicum]	0.74	0.84	1.39	1.26	0.87	1.48	0.45	0.51	0.09	0.08	0.41	0.84	1.1	0.4
TRINITY_DN35821_c0_g1	K08902	-	-4.21085	down	PSB27-1	photosystem II repair protein PSB27-H1, chloroplastic [Morus notabilis]	2.59	3.11	3.5	4.37	13.09	6.54	181.39	149.81	142.02	147.38	77.82	110.26	5.53	134.78
TRINITY_DN3584_c0_g1	K05278	EC:1.14.20.6	2.41789	up	DLO1	protein DMR6-LIKE OXYGENASE 1-like [Hevea brasiliensis]	19.97	0.59	3.28	0	0.72	5.82	0.15	2.54	0.9	0.09	0.85	3.03	5.06	1.26
TRINITY_DN35898_c0_g1	K00234	EC:1.3.5.1	1.39109	up	SDH1-1	PREDICTED: succinate dehydrogenase [ubiquinone] flavoprotein subunit 1, mitochondrial-like [Juglans regia]	27.55	50.14	13.24	26.24	20.76	25.23	7.18	17.71	16.96	13.93	14.27	11.21	27.19	13.54
TRINITY_DN35918_c0_g1	K14303	-	2.89479	up	NUP160	Nup160 domain-containing protein [Cephalotus follicularis]	3.97	3.2	1.96	3.45	1.79	2.98	0.79	0.69	0.64	0.57	0.55	0.62	2.89	0.64
TRINITY_DN35937_c0_g1	K02940	-	1.67109	up	Rpl9	PREDICTED: 60S ribosomal protein L9-like [Musa acuminata subsp. malaccensis]	1.57	3.36	7.12	6.48	6.18	5.17	0.46	0.56	2.34	2.03	2.33	5.09	4.98	2.13
TRINITY_DN35950_c0_g1	K01255	EC:3.4.11.1	-1.73144	down	CYCP3-1	cyclin-P3-1 [Ricinus communis]	1.13	1.59	2.83	3.83	1.16	1.16	7.35	7.63	9.57	6.34	15.03	6.57	1.95	8.75
TRINITY_DN35969_c0_g3	K12828	-	1.25856	up	SF3B1	splicing factor 3B subunit 1 [Citrus clementina]	40.92	67.25	25.78	47.88	38.4	43.72	27.44	29.66	20.39	22.77	17.84	19.49	43.99	22.93
TRINITY_DN35987_c0_g2	K01870	EC:6.1.1.5	-2.2634	down	DIR23	dirigent protein 23 [Populus trichocarpa]	1.59	1.2	0.92	0.77	0.95	0.94	2.6	3.93	10.12	9.4	6.23	8.11	1.06	6.73
TRINITY_DN36015_c0_g1	K08909	-	-1.73607	down	CAB8	chlorophyll a-b binding protein 8, chloroplastic [Manihot esculenta]	49.52	86.76	146.29	115.76	393.05	231.13	1074.75	911.78	578.49	660.9	413.88	641.85	170.42	713.61
TRINITY_DN36026_c0_g3	K00264	EC:1.4.1.13 1.4.1.14	3.18643	up	GLT1	PREDICTED: glutamate synthase 1 [NADH], chloroplastic isoform X1 [Populus euphratica]	5.66	12.08	5.06	10.35	10.84	5.77	0.51	0.83	1.5	1.91	1.49	0.81	8.29	1.18
TRINITY_DN36078_c0_g1	K01051	EC:3.1.1.11	-1.51251	down	-	PREDICTED: 21 kDa protein [Populus euphratica]	2.19	1.7	1.07	2.05	0.71	0.96	6.62	8.62	5.91	3.21	3.73	3.51	1.45	5.27
TRINITY_DN36117_c0_g1	K05391	-	2.75039	up	CNGC20	probable cyclic nucleotide-gated ion channel 20, chloroplastic isoform X1 [Cynara cardunculus var. scolymus]	11.55	9.54	3.7	12.3	5.38	12.32	0.34	0.34	5.5	3.57	0.87	4.71	9.13	2.55
TRINITY_DN36188_c0_g2	K02936	-	1.47418	up	Rpl7a	60S ribosomal protein L7a [Zea mays]	0.55	2.51	3.96	4.41	4.96	5.23	1.04	0.63	2.25	1.94	2.01	2.49	3.6	1.73
TRINITY_DN36222_c0_g1	K02723	-	7.40388	up	PSBY	PREDICTED: photosystem II core complex proteins psbY, chloroplastic [Nicotiana attenuata]	0	0	5.91	0	4.95	0	0	0	0	0	0	0	1.81	0
TRINITY_DN36261_c0_g1	K09458	EC:2.3.1.179	1.26545	up	KAS1	3-oxoacyl-[acyl-carrier-protein] synthase I, chloroplastic [Populus trichocarpa]	33.92	37.25	5.69	24.86	31.41	40.26	18.84	15.51	16.34	18.49	12.49	12.55	28.9	15.7
TRINITY_DN36271_c0_g2	K03036	-	3.24627	up	-	Pollen_Ole_e_I domain-containing protein [Cephalotus follicularis]	3.46	9.81	5.82	8.94	8.48	6.44	0.63	0.41	1.52	1.26	1.11	0.89	7.16	0.97
TRINITY_DN36296_c0_g1	K09480	EC:2.4.1.241	2.6647	up	DGD1	digalactosyldiacylglycerol synthase 1, chloroplastic [Citrus clementina]	11.14	14.24	18.27	25.59	11.9	13.86	3.35	2.64	1.32	4.35	6.6	1.26	15.83	3.25
TRINITY_DN36307_c1_g1	K10781	EC:3.1.2.14 3.1.2.21	7.07322	up	FATB	palmitoyl-acyl carrier protein thioesterase, chloroplastic [Populus trichocarpa]	0.24	0.48	21.71	5.52	2.63	1.12	0	0.05	0.08	0.05	0.02	0.09	5.28	0.05
TRINITY_DN36427_c0_g2	K20607	EC:2.7.12.2	-1.22452	down	MKK3	mitogen-activated protein kinase kinase 3 [Hevea brasiliensis]	5.76	3.71	4	2.75	6.07	3.16	13	17.13	14.9	12.04	11.78	9.96	4.24	13.13
TRINITY_DN36433_c0_g1	K14513	-	-1.77676	down	EIN2	hypothetical protein POPTR_016G090800 [Populus trichocarpa]	9.09	12.76	14.69	7.03	9.74	8.38	61.12	60.77	33.17	31.63	34.58	56.98	10.28	46.38
TRINITY_DN36509_c0_g1	K13412	EC:2.7.11.1	3.51185	up	CPK10	calcium-dependent protein kinase 10 [Jatropha curcas]	10.55	2.68	7.98	4.4	4.61	4.51	0	0.13	0.63	0.48	1.19	1.53	5.79	0.66
TRINITY_DN36546_c0_g2	K02985	-	1.52339	up	RPS3	40S ribosomal protein S3-1-like [Helianthus annuus]	0.88	3.55	5.14	5.02	5.81	6.77	1.07	0.48	1.82	1.37	3.48	4.4	4.53	2.1
TRINITY_DN36548_c0_g1	K02698	-	7.35173	up	PSAK	photosystem I reaction center subunit X PSI-K [Nicotiana benthamiana]	0	0	22.98	0	11.04	0	0	0	0	0	0	0	5.67	0
TRINITY_DN36661_c0_g1	K14164	EC:6.1.1.14	-2.79429	down	EDD1	PREDICTED: glycine--tRNA ligase 2, chloroplastic/mitochondrial isoform X2 [Populus euphratica]	0.15	0.24	0.11	0.04	0.11	0.08	1.65	1.62	0.83	0.99	0.72	0.77	0.12	1.1
TRINITY_DN36665_c0_g1	K03250	-	2.14649	up	TIF3E1	eukaryotic translation initiation factor 3 subunit E [Sesamum indicum]	2.62	3.91	0.99	1.55	1.43	0.58	0.52	0.44	0.43	0.63	0.5	0.56	1.85	0.51
TRINITY_DN36706_c0_g1	K00858	EC:2.7.1.23	1.42238	up	NADK1	hypothetical protein POPTR_001G256100 [Populus trichocarpa]	24.75	31.96	49.74	26.09	32.45	21.38	10.79	10.44	20.19	13.12	16.66	27.89	31.06	16.52
TRINITY_DN36715_c1_g1	K05285	EC:2.7.-.-	2.76347	up	Pign	PREDICTED: GPI ethanolamine phosphate transferase 1 [Juglans regia]	5.97	6.73	2.82	7.35	3.39	7.87	0.77	1.35	1.12	1.04	1.33	0.73	5.69	1.06
TRINITY_DN36727_c0_g1	K00083	EC:1.1.1.195	-2.09833	down	10HGO	8-hydroxygeraniol dehydrogenase [Prunus persica]	10.94	0.64	1.26	0.4	1.25	4.88	27.37	18.73	24.02	6.49	18.09	16.97	3.23	18.61
TRINITY_DN36751_c0_g1	K08330	-	2.23684	up	ATG11	autophagy-related protein 11 [Ricinus communis]	17.88	13.87	20.14	18.08	12.89	18.91	3.78	5.35	5.15	4.63	4.57	4.94	16.96	4.74
TRINITY_DN36819_c0_g1	K01886	EC:6.1.1.18	5.98894	up	-	PREDICTED: glutamine--tRNA ligase, cytoplasmic [Eucalyptus grandis]	3.58	1.83	10.84	4.92	3.01	1.04	0.22	0.22	0	0	0.22	0	4.2	0.11
TRINITY_DN36833_c0_g1	K00605	EC:2.1.2.10	2.07666	up	GDCST	PREDICTED: aminomethyltransferase, mitochondrial [Ipomoea nil]	0.23	0.32	0.73	1.16	0.7	0.55	0.21	0.25	0.07	0.04	0.3	0.27	0.61	0.19
TRINITY_DN36855_c0_g1	K03243	-	1.71977	up	SPAC56F8.03	PREDICTED: eukaryotic translation initiation factor 5B [Vitis vinifera]	16.77	21.36	20.68	37.51	20.97	17.96	11.1	9.78	10.43	8.54	3.47	12.09	22.54	9.23
TRINITY_DN36866_c0_g1	K06100	-	-1.65442	down	-	hypothetical protein POPTR_016G116600 [Populus trichocarpa]	1.7	0.83	0.87	1.61	3.15	1.77	5.52	5.71	6.82	5.08	3.64	2.95	1.66	4.95
TRINITY_DN36886_c0_g4	K00600	EC:2.1.2.1	1.92533	up	SHM4	serine hydroxymethyltransferase [Populus tremuloides]	10.7	23.09	2.48	13.58	3.31	11.58	4.91	4.4	6.1	5.27	3.36	3.21	10.79	4.54
TRINITY_DN36913_c0_g1	K13459	-	-2.42309	down	-	probable disease resistance protein At4g27220 isoform X1 [Populus trichocarpa]	2.39	1.65	1.48	0	0.7	2.22	4.38	13.1	10.27	12.51	9.6	13.55	1.41	10.57
TRINITY_DN36916_c0_g1	K10258	EC:1.3.1.93	3.95957	up	Tecr	hypothetical protein CHLNCDRAFT_20573 [Chlorella variabilis]	0.15	0.36	3.05	1.24	1.74	3.4	0.23	0.07	0.07	0.07	0.25	0.14	1.66	0.14
TRINITY_DN36973_c0_g2	K14494	-	-1.76283	down	SCL3	scarecrow-like protein 3 isoform X1 [Manihot esculenta]	0.29	1.22	0.29	0.13	0.84	0.27	0.88	1.61	1.17	1.89	2.83	4.21	0.51	2.1
TRINITY_DN37008_c0_g2	K12129	-	-1.56932	down	PRR73	two-component response regulator-like APRR7 isoform X1 [Manihot esculenta]	11.32	11.29	11.05	9.03	11.7	13.82	46.15	47.65	37.55	47.66	51.78	34.74	11.37	44.25
TRINITY_DN37008_c0_g3	K12129	-	-1.33747	down	PRR73	two-component response regulator-like APRR7 isoform X1 [Manihot esculenta]	25.74	23.59	24.74	17.1	27.55	25.81	81.11	99.09	79.26	78.31	61.06	75.22	24.09	79.01
TRINITY_DN37034_c1_g2	K10775	EC:4.3.1.24	1.78036	up	PAL	phenylalanine ammonia-lyase, partial [Rhizophora mangle]	0.5	1.57	1.24	0.95	0.89	0.7	0	0.38	0.19	0.12	1.04	0.85	0.97	0.43
TRINITY_DN37085_c0_g1	K14288	-	1.77089	up	PSD	exportin-T-like isoform X2 [Hevea brasiliensis]	13.56	13.78	11.94	14.58	11.16	8.82	4.76	3.13	2.52	4.49	6.29	4.27	12.31	4.24
TRINITY_DN37092_c0_g1	K00264	EC:1.4.1.13 1.4.1.14	4.05804	up	Os01g0681900	hypothetical protein OsI_03285 [Oryza sativa Indica Group]	91.26	152.12	146.11	146.96	129.9	84.82	10.05	13.83	6.13	11.34	3.95	13.07	125.2	9.73
TRINITY_DN37092_c0_g4	K00264	EC:1.4.1.13 1.4.1.14	3.02593	up	-	glutamate synthase 1 [NADH], chloroplastic isoform X1 [Manihot esculenta]	10.4	10.47	5.11	7.44	13.73	9.4	1.85	1.83	1.23	1.75	0.92	1.49	9.43	1.51
TRINITY_DN37135_c0_g1	K14498	EC:2.7.11.1	-1.09986	down	SAPK7	serine/threonine-protein kinase SRK2A-like [Momordica charantia]	6.05	11.62	6.98	5.9	7.29	5.61	19.96	17.36	15.36	24.75	25.04	17.54	7.24	20
TRINITY_DN37139_c0_g1	K03070	-	-3.76299	down	SECA1	PREDICTED: protein translocase subunit SecA, chloroplastic [Cucumis sativus]	0	0.23	0.48	0.12	0.1	0	4.31	3.9	0.99	2.22	2.97	2.25	0.15	2.77
TRINITY_DN37171_c0_g1	K02885	-	5.1807	up	RPL19C	PREDICTED: 60S ribosomal protein L19-2-like, partial [Musa acuminata subsp. malaccensis]	4.41	0.76	2.74	0.52	0.34	0.86	0.04	0.06	0.06	0.06	0.06	0	1.6	0.05
TRINITY_DN37178_c0_g1	K14514	-	2.76647	up	EIL3	EIN3 domain-containing protein [Cephalotus follicularis]	20.63	20.2	18.72	18.28	14.03	15.34	2.83	2.85	3.72	4.44	3.71	2.8	17.87	3.39
TRINITY_DN37178_c0_g2	K14514	-	1.55836	up	-	LOW QUALITY PROTEIN: ETHYLENE INSENSITIVE 3-like 3 protein [Ziziphus jujuba]	10.24	10.42	3.88	6.19	7.68	9.15	4.23	3.66	2.01	4.48	3.17	2.98	7.93	3.42
TRINITY_DN37224_c0_g10	K02261	-	1.1932	up	Mtco2	cytochrome oxidase subunit 2 (mitochondrion) [Pyramimonas parkeae]	21.38	28.35	100.27	110.13	107.62	127.54	26.56	41.07	45.67	54.69	59.89	69.24	82.55	49.52
TRINITY_DN37398_c0_g1	K03260	-	1.10242	up	EIF(ISO)4G1	eukaryotic translation initiation factor isoform X1 [Jatropha curcas]	42.91	56.64	25.4	57.82	34.96	47.42	29.43	28.95	25.04	29.15	22.86	23.17	44.19	26.43
TRINITY_DN37407_c0_g1	K14682	EC:2.3.1.1	2.27384	up	NAGS2	hypothetical protein POPTR_007G005300 [Populus trichocarpa]	18.56	27.88	22.3	22.82	16.65	19.87	4.49	3.09	5.51	7.95	5.2	10.81	21.35	6.17
TRINITY_DN37483_c0_g1	K01051	EC:3.1.1.11	2.73252	up	-	21 kDa protein-like [Hevea brasiliensis]	3.52	3.27	3.76	5.84	10.96	9.04	0	0.54	2.69	0.26	0.45	3.4	6.07	1.22
TRINITY_DN37491_c0_g2	K01873	EC:6.1.1.9	-2.52072	down	EMB2247	valine--tRNA ligase, chloroplastic/mitochondrial 2 isoform X2 [Quercus suber]	0.52	0.43	0.21	0.11	0.25	0.21	3.82	3.06	2.39	1.75	0.57	1.11	0.29	2.12
TRINITY_DN37493_c0_g1	K14641	EC:3.6.1.5	1.57731	up	RROP1	Nucleoside phosphatase [Handroanthus impetiginosus]	0.48	0.16	0.75	1.11	0.46	0.59	0.09	0.49	0.12	0.06	0.33	0.47	0.59	0.26
TRINITY_DN37506_c0_g2	K13993	-	-3.19924	down	HSP15.7	15.7 kDa heat shock protein, peroxisomal [Morus notabilis]	15.97	27.48	9.76	16.35	25.68	15.26	289.97	254.98	215.67	196.31	156.9	178.25	18.42	215.35
TRINITY_DN37523_c0_g2	K01001	EC:2.7.8.15	-1.82913	down	-	PREDICTED: UDP-N-acetylglucosamine--dolichyl-phosphate N-acetylglucosaminephosphotransferase [Eucalyptus grandis]	1.03	0.78	3.57	0.66	2.38	0.97	8.13	7.07	6.42	11.64	3.55	8.38	1.57	7.53
TRINITY_DN37547_c0_g1	K09591	EC:1.3.1.22	-1.40595	down	DET2	hypothetical protein MANES_08G087200 [Manihot esculenta]	2.18	2.84	0.76	1.28	4.47	2.4	9.53	12.6	5.44	7.72	5.71	5.91	2.32	7.82
TRINITY_DN37550_c1_g1	K02905	-	1.21058	up	Rpl29	60S ribosomal protein L29-1-like [Cucurbita pepo subsp. pepo]	0.27	1.95	3.62	4.09	3.08	3.54	0.96	0.54	1.88	1.42	2.28	2.61	2.76	1.61
TRINITY_DN37599_c1_g1	K10590	EC:2.3.2.26	1.12529	up	UPL3	hypothetical protein DVH24_009975 [Malus domestica]	10.85	13.55	9.82	13.42	7.71	7.5	5.26	7.12	5.14	7.69	5.94	6.05	10.47	6.2
TRINITY_DN37604_c0_g1	K20547	EC:3.2.1.14	4.38718	up	HEL	pathogenesis-related protein PR-4 [Populus trichocarpa]	30.39	7.15	117.46	12.88	20.21	16.99	2.04	0.83	4.84	1.53	2.17	3.9	34.18	2.55
TRINITY_DN37620_c0_g1	K13415	EC:2.7.10.1 2.7.11.1	-2.66962	down	-	hypothetical protein POPTR_005G086500 [Populus trichocarpa]	1.8	3.02	1.84	1.09	1.06	0.95	24.85	31.16	12	41.91	10.17	16.19	1.63	22.71
TRINITY_DN37637_c0_g1	K08905	-	6.74573	up	PSAG	PREDICTED: photosystem I reaction center subunit V, chloroplastic-like [Nicotiana sylvestris]	0	0	10.38	0	4.87	0	0	0	0	0	0	0	2.54	0
TRINITY_DN37726_c0_g1	K14682	EC:2.3.1.1	5.10414	up	-	probable amino-acid acetyltransferase NAGS2, chloroplastic [Carica papaya]	6.24	0.89	4.71	3.49	0.87	3.19	0	0.08	0.31	0	0.23	0.08	3.23	0.12
TRINITY_DN37737_c1_g8	K02153	-	-1.23371	down	VHA-e1	V-type proton ATPase subunit e1 [Carica papaya]	3.08	4.56	3.09	3.6	2.74	3.95	8.02	10.08	14.29	11.96	10.54	11.54	3.5	11.07
TRINITY_DN37767_c0_g6	K02989	-	1.59999	up	Rps5	Ribosomal protein S5/S7, eukaryotic/archaeal [Ostreococcus tauri]	0.81	2.52	4.72	3.22	4.23	5.82	0.73	0.71	1.01	1.36	2.82	2.85	3.55	1.58
TRINITY_DN37777_c0_g1	K04077	-	1.73817	up	CPN60B1	PREDICTED: ruBisCO large subunit-binding protein subunit beta, chloroplastic [Ipomoea nil]	0.81	0.95	1.44	2.59	1.49	2.03	0.24	0.46	0.23	0.11	0.94	1.78	1.55	0.63
TRINITY_DN37861_c0_g2	K13415	EC:2.7.10.1 2.7.11.1	1.34951	up	PSKR2	phytosulfokine receptor 2 [Manihot esculenta]	4.32	3.37	1.55	2.5	3.4	2.87	1.87	1.45	1.5	2.02	0.83	1.39	3	1.51
TRINITY_DN37875_c0_g3	K01681	EC:4.2.1.3	-1.50757	down	Os08g0191100	aconitate hydratase 1 isoform X2 [Hevea brasiliensis]	4.48	7.7	5.96	5.41	7.69	7.21	21.36	28.81	25.2	24.18	20.01	22.41	6.41	23.66
TRINITY_DN37894_c0_g1	K13415	EC:2.7.10.1 2.7.11.1	-1.40262	down	SPL8	squamosa promoter-binding protein 1-like isoform X1 [Hevea brasiliensis]	0.7	1.23	0.43	0.45	0.84	0.14	1.35	2.53	1.52	2.76	2.51	2.38	0.63	2.18
TRINITY_DN37898_c0_g1	K00430	EC:1.11.1.7	7.82719	up	GSVIVT00037159001	peroxidase 5 [Jatropha curcas]	13.7	1.34	7.92	12.62	4.47	25.51	0.08	0	0	0.12	0.04	0	10.93	0.04
TRINITY_DN37926_c0_g1	K12617	-	1.15023	up	-	protein PAT1 homolog 1 isoform X1 [Populus trichocarpa]	38.54	42.8	31.68	58.27	25.25	25.95	16.05	17.59	26.23	17.47	30	22.02	37.08	21.56
TRINITY_DN37951_c0_g1	K14292	EC:2.1.1.-	-2.40026	down	NAKR2	protein SODIUM POTASSIUM ROOT DEFECTIVE 3-like [Durio zibethinus]	0.4	0.12	0.5	0.61	0.43	0.17	1.34	0.97	0.9	2.28	8.88	1.32	0.37	2.62
TRINITY_DN37951_c0_g2	K14292	EC:2.1.1.-	-2.4491	down	NAKR2	protein SODIUM POTASSIUM ROOT DEFECTIVE 3 [Ricinus communis]	0.38	1.05	0.32	0.52	0.56	0.7	3.54	2.06	3.41	6.92	2.23	6.79	0.59	4.16
TRINITY_DN37989_c1_g1	K03787	EC:3.1.3.5	-1.3997	down	surE	uncharacterized protein LOC110814077 isoform X2 [Carica papaya]	5.07	13.88	5.8	3.9	12.56	4.17	23.27	22.16	25.2	30.43	25.24	38.41	7.56	27.45
TRINITY_DN37995_c0_g1	K13352	-	-3.25111	down	PEX11B	peroxisomal membrane protein 11-4 [Quercus suber]	2.06	2.13	1.19	1.65	4.03	1.6	30.82	35.54	21.19	30.02	19.73	16.15	2.11	25.57
TRINITY_DN38012_c1_g4	K03146	EC:2.4.2.60	2.17506	up	THI1-2	thiamine thiazole synthase 2, chloroplastic-like [Sesamum indicum]	2.61	2.76	4.09	5.29	3.44	4.12	1.39	1.03	0.38	0.18	1.57	1.81	3.72	1.06
TRINITY_DN38018_c0_g1	K02128	-	1.02376	up	ATP5G3	mitochondrial ATP synthase subunit 9 [Allium cepa]	2.65	0.75	2.28	2.53	2.39	2.19	0.77	1.45	1.46	1.58	1.13	2.29	2.13	1.45
TRINITY_DN38020_c0_g3	K00895	EC:2.7.1.90	1.8302	up	-	hypothetical protein CDL12_29243 [Handroanthus impetiginosus]	0.2	0.16	0.46	0.41	0.37	0.29	0.16	0.18	0.05	0	0.12	0.16	0.32	0.11
TRINITY_DN38053_c0_g2	K14005	-	3.29835	up	SEC31B	PREDICTED: protein transport protein SEC31 homolog B-like [Populus euphratica]	5.29	3.19	0.52	2.43	2.56	3.74	0.53	0.53	0.53	1.07	3.77	2.04	2.96	1.41
TRINITY_DN38072_c0_g1	K14007	-	-1.35377	down	At3g07100	Sec23/Sec24 beta-sandwich [Cynara cardunculus var. scolymus]	0.42	0.27	0.41	0.36	0.52	0.98	2.74	2.41	1.76	1.47	1.84	1.47	0.49	1.95
TRINITY_DN38078_c0_g1	K01626	EC:2.5.1.54	3.71017	up	DHAPS-1	3-deoxy-D-arabino-heptulosonate 7-phosphate synthase [Morinda citrifolia]	177.35	109.46	165.24	143.71	99.86	212.99	4.04	13.47	15.82	16.64	19.95	25.22	151.44	15.86
TRINITY_DN38099_c0_g1	K05658	EC:3.6.3.44	7.2347	up	ABCB4	hypothetical protein POPTR_014G113200 [Populus trichocarpa]	524.64	309.51	237.72	192.65	219.93	307.83	2.48	2.36	2.58	2.81	1.29	3.98	298.71	2.58
TRINITY_DN38128_c0_g1	K13065	EC:2.3.1.133	-2.1742	down	BEAT	PREDICTED: acetyl-CoA-benzylalcohol acetyltransferase-like [Populus euphratica]	0.23	0.38	0.26	0.47	0.44	0.41	1.75	1.95	1.72	3.51	1.39	2.61	0.36	2.15
TRINITY_DN38177_c0_g1	K00793	EC:2.5.1.9	-2.34585	down	rib5	riboflavin synthase [Hevea brasiliensis]	4.87	4.03	2.66	4.44	4.1	3.7	30.48	32.15	19.09	28.9	20.95	23.2	3.97	25.79
TRINITY_DN38192_c0_g1	K03655	EC:3.6.4.12	-1.14401	down	At3g02060	hypothetical protein CDL15_Pgr019823 [Punica granatum]	4.85	4.3	6.47	4.76	16.78	9.4	22.3	32.3	19.57	17.39	19.19	29.87	7.76	23.44
TRINITY_DN38194_c0_g2	K01595	EC:4.1.1.31	-2.02731	down	SCAR2	protein SCAR2-like isoform X2 [Hevea brasiliensis]	2.41	2.89	1.8	1.18	1.8	1.91	9.08	12.12	9.24	11.62	9.94	10.33	2	10.39
TRINITY_DN38195_c0_g1	K13126	-	5.76861	up	NAC090	PREDICTED: NAC domain-containing protein 90-like [Juglans regia]	4.43	0	7.77	0.52	1.88	1.04	0	0	0.27	0	0	0	2.61	0.05
TRINITY_DN38202_c2_g1	K13412	EC:2.7.11.1	2.48685	up	CPK7	hypothetical protein CICLE_v10014873mg [Citrus clementina]	12.78	11.9	12.84	10.18	14.24	18.21	2.64	0.38	1.62	2.85	1.4	2.37	13.36	1.88
TRINITY_DN38202_c3_g4	K00679	EC:2.3.1.158	8.85923	up	At1g29670	GDSL esterase/lipase At1g29670-like [Manihot esculenta]	1.96	0.18	6.1	0.12	4	4.06	0	0	0	0	0	0	2.74	0
TRINITY_DN38236_c0_g3	K02875	-	1.47859	up	Rpl14	60 ribosomal protein L14 [Zea mays]	1	2.37	3.95	3.9	3.59	3.25	0.61	0.6	0.79	1.9	2.27	2.5	3.01	1.45
TRINITY_DN38244_c0_g1	K02638	-	6.21291	up	PETE	chloroplast plastocyanin precursor [Nicotiana benthamiana]	0	0	3.36	0	2.06	0	0	0	0	0	0	0	0.9	0
TRINITY_DN38244_c0_g2	K02638	-	6.9997	up	PETE	PREDICTED: plastocyanin [Nicotiana sylvestris]	0	0	6.07	0	4.06	0	0	0	0	0	0	0	1.69	0
TRINITY_DN38264_c0_g1	K13449	-	2.60667	up	-	pathogenesis-related protein 1-like [Hevea brasiliensis]	1703.62	368.76	1524.18	145.18	346.57	814.94	36.43	39.9	691.81	23.09	59.83	268.15	817.21	186.53
TRINITY_DN38268_c0_g1	K18442	-	1.59227	up	BIG1	Brefeldin A-inhibited guanine nucleotide-exchange protein 1 [Vitis vinifera]	7.2	10.82	4.58	5.9	5.59	6.82	2.41	3.05	3.61	2.68	2.63	2.93	6.82	2.88
TRINITY_DN38269_c0_g1	K16794	-	5.75422	up	JGB	protein JINGUBANG [Populus trichocarpa]	21.97	12.01	73.06	16.99	8.05	22.39	0.18	0.35	0.52	0.59	1.38	0.84	25.74	0.64
TRINITY_DN38277_c0_g1	K03128	-	1.11598	up	-	PREDICTED: transcription initiation factor TFIID subunit 2 isoform X1 [Populus euphratica]	15.45	11.37	5.61	14.87	7.86	4.81	6.42	6.22	6.06	3.94	5.97	4.06	9.99	5.45
TRINITY_DN38281_c1_g1	K01191	EC:3.2.1.24	1.24106	up	-	Endonuclease [Actinidia chinensis var. chinensis]	25.13	46.94	53.41	76.68	32.69	23.77	20.12	28.19	21.43	37.7	22.71	28.93	43.1	26.51
TRINITY_DN38300_c0_g1	K02636	EC:1.10.9.1	1.54102	up	petC	cytochrome b6-f complex iron-sulfur subunit 2, chloroplastic-like protein [Cinnamomum micranthum f. kanehirae]	2.43	2.22	3.54	3.43	1.73	2.46	2.04	2.25	0.55	0.45	1.24	1.68	2.64	1.37
TRINITY_DN38300_c1_g1	K02636	EC:1.10.9.1	6.88963	up	petC2	PREDICTED: cytochrome b6-f complex iron-sulfur subunit 1, chloroplastic [Nicotiana tomentosiformis]	0	0	9.94	0	6.56	0	0	0	0	0	0	0	2.75	0
TRINITY_DN38355_c0_g1	K01110	EC:3.1.3.16 3.1.3.48 3.1.3.67	-3.77054	down	PTEN1	phosphatidylinositol 3,4,5-trisphosphate 3-phosphatase and protein-tyrosine-phosphatase PTEN1 [Hevea brasiliensis]	0.18	0.29	0.54	0.28	0.24	0.5	5.87	5.55	8.76	6.54	5.74	7.66	0.34	6.69
TRINITY_DN38355_c0_g2	K01110	EC:3.1.3.16 3.1.3.48 3.1.3.67	-2.28465	down	PTEN1	phosphatidylinositol 3,4,5-trisphosphate 3-phosphatase and protein-tyrosine-phosphatase PTEN1 [Hevea brasiliensis]	0.25	1.06	0.83	0.84	1.13	0.95	9.26	4.85	4.28	5.74	3.86	4.56	0.84	5.43
TRINITY_DN38359_c0_g1	K10743	EC:3.1.26.4	-2.17992	down	At2g25100	ribonuclease H2 subunit A isoform X1 [Hevea brasiliensis]	3.19	1.96	1.73	4.26	3.45	2.73	16.27	16.53	16.94	13.1	15.44	21.44	2.89	16.62
TRINITY_DN38370_c0_g3	K00820	EC:2.6.1.16	-1.26438	down	-	Glucosamine 6-phosphate synthetase [Handroanthus impetiginosus]	1.18	1.83	0.92	2.02	1.45	0.75	4.64	4.89	2.64	5.96	4.89	2.86	1.36	4.31
TRINITY_DN38372_c3_g2	K13126	-	3.74381	up	NAC090	PREDICTED: NAC domain-containing protein 90-like [Juglans regia]	53.11	12.34	55.9	16.22	26.87	39.73	0.29	0.3	6.62	0.99	4.45	7.54	34.03	3.36
TRINITY_DN38379_c0_g1	K01784	EC:5.1.3.2	4.52172	up	UGE4	UDP-glucose 4-epimerase 5-like [Manihot esculenta]	69.24	51.55	121.9	88.18	85.08	65.4	2.63	1.54	9.57	6.38	5.13	5.54	80.23	5.13
TRINITY_DN38389_c0_g1	K08915	-	9.25155	up	LHCB4.1	PREDICTED: chlorophyll a-b binding protein CP29.1, chloroplastic-like [Nicotiana sylvestris]	0	0	13.53	0	9.81	0	0	0	0	0	0	0	3.89	0
TRINITY_DN38398_c0_g2	K13412	EC:2.7.11.1	3.30118	up	CPK7	hypothetical protein GW17_00044071, partial [Ensete ventricosum]	28.67	35.3	35.27	23.95	19.27	22.36	1.78	4.83	6.3	4.29	4.43	4.28	27.47	4.32
TRINITY_DN38415_c0_g1	K03178	EC:6.2.1.45	1.30971	up	UBA1	ubiquitin-activating enzyme E1 1 [Ricinus communis]	15.49	24.43	9.1	19.92	18.29	16.01	10.5	8.78	7.44	11.17	7.32	8.2	17.21	8.9
TRINITY_DN38417_c0_g6	K14486	-	1.09215	up	ARF2	auxin response factor 2A-like [Manihot esculenta]	114.07	188.72	54.32	169.55	91.7	112.83	66.49	80.36	68.05	59.98	96.16	60.31	121.87	71.89
TRINITY_DN38437_c0_g2	K00234	EC:1.3.5.1	1.49575	up	SDH1-1	succinate dehydrogenase [ubiquinone] flavoprotein subunit 1, mitochondrial [Ricinus communis]	5.23	9.76	3.17	7.13	6.5	9.62	2.14	2.89	3.91	2.5	4.29	3.29	6.9	3.17
TRINITY_DN38451_c1_g1	K02638	-	2.08543	up	PETE	hypothetical protein CDL12_26119 [Handroanthus impetiginosus]	0.45	0.36	1.27	1.44	0.9	0.91	0.43	0.29	0	0	0.45	0.45	0.89	0.27
TRINITY_DN38453_c0_g1	K00430	EC:1.11.1.7	4.94984	up	PER21	peroxidase 21 [Ricinus communis]	1.47	0.32	7.53	0.83	2.96	0.6	0.04	0	0.1	0.2	0	0.24	2.28	0.1
TRINITY_DN38460_c1_g8	K07541	-	-1.02593	down	-	uncharacterized protein LOC110609478 [Manihot esculenta]	3.52	4.58	2.68	2.59	4.73	3.79	8.08	10.29	8.92	10.7	9.11	11.05	3.65	9.69
TRINITY_DN38468_c0_g1	K18442	-	2.47659	up	BIG1	hypothetical protein CICLE_v10027671mg [Citrus clementina]	10.03	14.06	4.23	10.58	10.16	8.64	5.37	2.02	2.35	5	4.71	2.63	9.62	3.68
TRINITY_DN38494_c0_g1	K03353	-	5.63771	up	APC6	anaphase-promoting complex subunit 6 isoform X3 [Spinacia oleracea]	4.28	5.15	3.91	4.32	3.21	2.41	0.09	0.04	0	0	0.09	0.34	3.88	0.09
TRINITY_DN38503_c0_g3	K12585	EC:3.1.13.-	4.51862	up	RRP44A	exosome complex exonuclease RRP44 homolog A isoform X2 [Citrus clementina]	3.69	5.33	9.97	7.81	2.62	4.92	0.24	0.29	0.11	0.33	0.4	0.56	5.72	0.32
TRINITY_DN38507_c0_g1	K12486	-	4.07948	up	AGD5	probable ADP-ribosylation factor GTPase-activating protein AGD5 isoform X1 [Quercus suber]	90.45	54.56	50.54	38.99	55.49	74.39	4.03	3.35	12.66	2.41	3.27	3.11	60.74	4.8
TRINITY_DN38516_c0_g3	K00695	EC:2.4.1.13	1.70748	up	SS	sucrose synthase [Dimocarpus longan]	31.2	18.21	9.77	14.94	35.49	21.44	2.85	7.01	9.21	14.12	7.47	11.85	21.84	8.75
TRINITY_DN38528_c0_g2	K06611	EC:2.4.1.67	1.48814	up	STS1	stachyose synthase [Sesamum indicum]	0.12	0.16	0.31	0.25	0.24	0.11	0.04	0.06	0.08	0.04	0.07	0.26	0.2	0.09
TRINITY_DN38529_c1_g8	K00799	EC:2.5.1.18	7.57873	up	-	glutathione S-transferase U7 [Ricinus communis]	526.55	304.17	557.55	293.43	338	405.94	3.04	1.09	3.84	2.09	1.64	5.59	404.27	2.88
TRINITY_DN38536_c1_g3	K01092	EC:3.1.3.25	2.18786	up	CURT1A	hypothetical protein CDL12_25930 [Handroanthus impetiginosus]	1.64	1.62	2.78	2.05	1.8	2.14	0.8	1	0.14	0	0.63	0.82	2.01	0.56
TRINITY_DN38563_c0_g1	K12173	-	2.42458	up	At1g18250	thaumatin-like protein [Ricinus communis]	1.62	0.24	5.63	1.31	75.6	12.32	1.07	1.17	4.54	8.31	1.32	7.72	16.12	4.02
TRINITY_DN38567_c0_g1	K12667	-	2.34086	up	RPN2	PREDICTED: dolichyl-diphosphooligosaccharide--protein glycosyltransferase subunit 2-like [Populus euphratica]	4.83	3.97	3.42	1.73	1.66	0.96	1.36	0.5	0.62	0.79	1	0.11	2.76	0.73
TRINITY_DN38579_c0_g3	K05674	-	-1.02035	down	ABCC13	hypothetical protein MANES_11G066800 [Manihot esculenta]	0.29	0.32	0.1	0.21	0.28	0.37	0.83	0.88	0.82	0.7	0.4	0.49	0.26	0.69
TRINITY_DN38603_c0_g1	K14649	-	-1.22963	down	-	transcription initiation factor TFIID subunit 8 [Populus trichocarpa]	1.26	2.4	0.47	0.95	0.64	0.72	3.73	3.56	3	3.48	2.27	2.66	1.07	3.12
TRINITY_DN38605_c0_g2	K01919	EC:6.3.2.2	1.07875	up	GSH1	hypothetical protein Ccrd_002519 [Cynara cardunculus var. scolymus]	18.48	63.88	27.25	40.63	51.38	71.4	27.74	33.71	22.7	27.63	30.18	24.88	45.5	27.81
TRINITY_DN38605_c0_g3	K01919	EC:6.3.2.2	2.02051	up	GSH1-1	hypothetical protein DVH24_019890 [Malus domestica]	32.44	71.24	28.47	54.67	42.39	65.99	24.3	47.13	33.83	23.29	22.61	26.86	49.2	29.67
TRINITY_DN38610_c0_g1	K01623	EC:4.1.2.13	2.8398	up	Aldoa	PREDICTED: fructose-bisphosphate aldolase 7, cytosolic [Raphanus sativus]	0.32	0.66	4.52	4.9	3.28	4.58	0.37	0.14	0.78	0.58	0.78	0.76	3.04	0.57
TRINITY_DN38610_c0_g2	K01623	EC:4.1.2.13	5.29334	up	Aldoc	fructose-bisphosphate aldolase, cytoplasmic isozyme 1 [Jatropha curcas]	0.06	0.03	2	2.33	1.63	2.1	0.1	0.03	0	0	0.09	0.03	1.36	0.04
TRINITY_DN38655_c0_g1	K03878	EC:1.6.5.3	1.28466	up	Mtnd1	NADH dehydrogenase subunit 1 (mitochondrion) [Prasinoderma coloniale]	6.4	9.82	31.1	36.28	33.01	39.03	8.78	11.55	12.7	16.37	16.29	20.16	25.94	14.31
TRINITY_DN38655_c0_g2	K03879	EC:1.6.5.3	1.50433	up	Mtnd2	NADH dehydrogenase subunit 2 (mitochondrion) [Nephroselmis olivacea]	2.89	4.74	16.45	20.85	17	21.04	4.6	4.73	4.98	6	8.59	10.32	13.83	6.54
TRINITY_DN38661_c1_g1	K03006	EC:2.7.7.6	1.21973	up	-	Endonuclease [Actinidia chinensis var. chinensis]	37.37	61.26	66.37	112.42	32.97	23.12	25.91	33.85	30.96	39.46	28.6	35.88	55.59	32.44
TRINITY_DN38664_c0_g1	K02693	-	7.05594	up	PSAEB	photosystem I reaction center subunit IV B, chloroplastic [Nicotiana sylvestris]	0	0	8.68	0	5.45	0	0	0	0	0	0	0	2.35	0
TRINITY_DN38695_c0_g2	K03428	EC:2.1.1.11	2.19799	up	CHLM	PREDICTED: magnesium protoporphyrin IX methyltransferase, chloroplastic [Erythranthe guttata]	0.38	0.39	0.57	0.46	0.36	0.53	0.15	0.15	0.08	0.08	0.08	0.31	0.45	0.14
TRINITY_DN38699_c0_g1	K08873	EC:2.7.11.1	1.31976	up	-	serine/threonine-protein kinase SMG1-like isoform X2 [Hevea brasiliensis]	17.95	18.34	15.84	24.55	12.03	6.29	12.55	12.6	11.86	14.26	19.04	11.56	15.83	13.65
TRINITY_DN38707_c0_g1	K00913	EC:2.7.1.159 2.7.1.134	-1.26813	down	ITPK3	hypothetical protein TSUD_115210 [Trifolium subterraneum]	17.43	21.01	22.39	17.83	16.32	16.79	70.7	54.62	56.72	57.18	54.45	52.33	18.63	57.67
TRINITY_DN38716_c0_g1	K14293	-	-1.82247	down	KPNB1	unnamed protein product, partial [Vitis vinifera]	2.66	4.41	1.43	3.2	2.74	1.87	6.09	5.23	21.06	7.76	17.66	16.07	2.72	12.31
TRINITY_DN38739_c0_g1	K02952	-	-1.79574	down	RPS13	uncharacterized protein LOC105638882 [Jatropha curcas]	17.53	26.78	23.16	19.79	61.26	41.77	138.51	144.53	155.83	163.45	101.12	159.3	31.71	143.79
TRINITY_DN38750_c0_g1	K01188	EC:3.2.1.21	2.34404	up	BGLU12	beta-glucosidase 12-like [Hevea brasiliensis]	79.05	1.11	11.06	0.55	20.45	30.65	5.42	9.08	13.97	1.01	6.44	1.55	23.81	6.25
TRINITY_DN38753_c0_g1	K12130	-	2.23141	up	-	two-component response regulator-like APRR9 isoform X3 [Hevea brasiliensis]	8.17	8.89	6.13	4.27	3.11	8.63	1.67	3.21	1.03	3	1.03	1.85	6.53	1.96
TRINITY_DN38753_c0_g3	K12130	-	1.19544	up	-	PREDICTED: two-component response regulator-like APRR9 isoform X2 [Populus euphratica]	24.24	53.02	24.69	36.58	38.56	42.57	27.72	35.07	8.63	23.88	12.58	13.97	36.61	20.31
TRINITY_DN38763_c0_g1	K19476	-	1.77629	up	-	uncharacterized protein LOC110637336 [Hevea brasiliensis]	2.18	2.63	1.63	6.48	7.33	1.61	1.19	0.85	1.08	2.43	1.2	1.52	3.64	1.38
TRINITY_DN38763_c0_g2	K19476	-	-2.1408	down	-	uncharacterized protein LOC110637336 [Hevea brasiliensis]	2.05	3.72	0.96	1.3	1.13	2.16	11.41	16.86	8.22	10.76	11.03	7.23	1.89	10.92
TRINITY_DN38778_c0_g2	K02898	-	1.68225	up	RPL26	hypothetical protein DM860_004889 [Cuscuta australis]	2.06	6.42	13.73	8.19	9.78	13.83	2.09	1.6	4.82	4.16	6.42	4.46	9	3.93
TRINITY_DN38786_c0_g1	K04125	EC:1.14.11.13	7.56815	up	GA2OX2	gibberellin 2-beta-dioxygenase 2 [Ricinus communis]	0.38	0.5	14.58	5.17	2.13	0.76	0	0	0.1	0	0	0	3.92	0.02
TRINITY_DN38794_c0_g1	K00889	EC:2.7.1.68	-2.04695	down	PIP5K9	phosphatidylinositol 4-phosphate 5-kinase 9 [Populus trichocarpa]	9.07	19.87	15.17	12.59	7.57	6.02	57.36	76.26	60.86	65.9	69.13	60.56	11.72	65.01
TRINITY_DN38803_c0_g5	K14516	-	9.53019	up	ERF095	PREDICTED: ethylene-responsive transcription factor ERF096-like [Populus euphratica]	43.8	27.03	51.45	37.37	22.88	53.08	0.03	0.19	0.08	0.05	0.03	0.03	39.27	0.07
TRINITY_DN38805_c0_g1	K01051	EC:3.1.1.11	5.39718	up	PME7	probable pectinesterase/pectinesterase inhibitor 7 [Jatropha curcas]	0.32	0.06	1.5	1.15	0.57	0.53	0.03	0	0	0	0	0.05	0.69	0.01
TRINITY_DN38806_c1_g8	K12355	EC:1.2.1.68	2.75408	up	ALDH2C4	hypothetical protein CISIN_1g038769mg, partial [Citrus sinensis]	2.67	1.51	5.43	6.41	10.74	3.41	1.47	1.21	0.97	1.16	0.24	0.94	5.03	1
TRINITY_DN38809_c3_g7	K13366	EC:1.5.3.14 1.5.3.16 1.5.3.-	2.69339	up	PAO1	polyamine oxidase 1-like isoform X2 [Hevea brasiliensis]	12.1	19.38	28.42	10.39	19.02	13.48	3.81	4.78	4.63	2.07	3.7	1.8	17.13	3.46
TRINITY_DN38830_c0_g1	K03868	EC:2.3.2.32	1.14407	up	RBX1A	unnamed protein product [Brassica oleracea]	19.63	31.63	13.53	21.04	23.09	24.28	11.99	15.01	10.35	15.29	13.78	12.93	22.2	13.22
TRINITY_DN38837_c2_g1	K11088	-	-1.23559	down	SMD3B	PREDICTED: small nuclear ribonucleoprotein Sm D3-like [Populus euphratica]	21.09	30.32	10.69	22.49	26.2	21.16	61.35	67.03	69.54	65.84	66.62	66.67	21.99	66.17
TRINITY_DN38859_c0_g2	K01126	EC:3.1.4.46	-1.69637	down	CRR7	protein CHLORORESPIRATORY REDUCTION 7, chloroplastic [Jatropha curcas]	7.51	6.23	4.39	5.34	17.91	11.24	41.07	36.86	36.53	40.85	26.21	37.59	8.77	36.52
TRINITY_DN38864_c1_g9	K10960	EC:1.3.1.83 1.3.1.111	-1.88384	down	CHLP	geranylgeranyl diphosphate reductase, chloroplastic [Jatropha curcas]	0.54	0.88	0.51	1.66	0.5	0.2	4.05	3.64	3.14	2.77	3.97	2.42	0.71	3.33
TRINITY_DN38870_c0_g3	K03517	EC:2.5.1.72	4.52232	up	SUFE2	sufE-like protein 2, chloroplastic isoform X3 [Hevea brasiliensis]	4.09	7.27	3.74	5.72	4.63	7.42	0.12	0.45	0.15	0.59	0.19	0.31	5.48	0.3
TRINITY_DN38870_c0_g4	K03517	EC:2.5.1.72	2.60863	up	SUFE2	sufE-like protein 2, chloroplastic isoform X3 [Hevea brasiliensis]	14.39	15.1	7.18	19.66	20.61	15.61	1.1	2.53	4.33	2.55	4.03	5.74	15.42	3.38
TRINITY_DN38876_c0_g1	K13422	-	-3.21011	down	BHLH93	Beta HLH protein 93 [Theobroma cacao]	0.12	0.16	0.08	0.04	0.04	0.04	0.55	0.23	0.53	2.94	0.8	0.82	0.08	0.98
TRINITY_DN38912_c0_g9	K14496	-	3.74671	up	PYL9	abscisic acid receptor PYL8-like [Durio zibethinus]	2.87	4.36	3.25	1.62	3.73	2.75	0.29	0.68	0.38	0.18	0.19	0	3.1	0.29
TRINITY_DN38920_c0_g2	K00878	EC:2.7.1.50	-1.53375	down	THIM	hydroxyethylthiazole kinase-like [Manihot esculenta]	1.6	3.61	2.26	2.48	4.51	3.34	12.36	13.23	9.69	9.27	10.98	10.31	2.97	10.97
TRINITY_DN38925_c0_g9	K07374	-	-1.16354	down	TUBA3	hypothetical protein DVH24_019011 [Malus domestica]	36.6	68.91	17.23	39.45	29.96	37.71	98.27	91.1	108.02	134.12	120.48	119.99	38.31	112
TRINITY_DN38931_c1_g4	K13459	-	-1.1242	down	-	NB-ARC domain-containing disease resistance protein, putative [Theobroma cacao]	2.6	4.87	1.8	2.11	1.13	1.31	4.93	6.95	5.03	7.59	5.07	7.73	2.3	6.22
TRINITY_DN38937_c0_g1	K20547	EC:3.2.1.14	8.37332	up	Cht10	chitinase 10 [Ricinus communis]	6.51	0.13	17.61	2.23	1.63	4.61	0.07	0	0	0	0	0	5.45	0.01
TRINITY_DN38937_c0_g2	K20547	EC:3.2.1.14	4.09826	up	Cht10	chitinase 10 [Ricinus communis]	3.4	0.83	14.29	2.07	1.75	2.74	0.07	0	0.66	0.32	0.13	0.84	4.18	0.34
TRINITY_DN38943_c0_g2	K02864	-	-2.66553	down	RPL10	50S ribosomal protein L10, chloroplastic [Jatropha curcas]	2.83	4.67	1.39	3.5	12.82	10.53	43.82	41.73	58.98	57	39.31	52.65	5.96	48.91
TRINITY_DN38954_c0_g1	K03063	-	-1.47135	down	RPT3	hypothetical protein COLO4_32355 [Corchorus olitorius]	3.6	1.55	2.48	1.79	3.4	4.18	24.45	22.03	11.64	35.12	16.26	24.39	2.83	22.32
TRINITY_DN38989_c3_g1	K10256	EC:1.14.19.6 1.14.19.22	1.5838	up	-	omega-6 desaturase [Linum usitatissimum]	2.39	2.07	7.31	3.56	3.81	1.75	1.94	2.45	1.84	1.11	0.73	1.93	3.48	1.67
TRINITY_DN39015_c1_g2	K10960	EC:1.3.1.83 1.3.1.111	2.27602	up	CHLP	Geranylgeranyl diphosphate reductase [Handroanthus impetiginosus]	0.34	0.31	0.76	0.76	0.48	0.54	0.1	0.1	0.04	0.04	0.24	0.33	0.53	0.14
TRINITY_DN39033_c0_g5	K12471	-	2.82146	up	EPSIN3	clathrin interactor EPSIN 2 [Sesamum indicum]	1.68	1.24	1	0.96	0.18	0.78	0.17	0.35	0.09	0.34	0.09	0.15	0.97	0.2
TRINITY_DN39033_c0_g7	K12471	-	2.75111	up	EPSIN3	clathrin interactor EPSIN 2 [Sesamum indicum]	30.32	38.95	26.91	42.22	35.51	25.95	9.49	7.17	3.22	12.22	5.96	9.52	33.31	7.93
TRINITY_DN39033_c0_g9	K12471	-	1.58371	up	EPSIN2	clathrin interactor EPSIN 3 [Vigna radiata var. radiata]	50.09	76.71	27.32	52.56	37.25	33.41	16.92	30.52	18.94	18.69	21.09	24.44	46.22	21.77
TRINITY_DN39053_c1_g1	K05917	EC:1.14.13.70	-4.74128	down	CYP51	Cytochrome P450 [Cinnamomum micranthum f. kanehirae]	0.28	0.36	0.19	0.07	0.13	0.21	5.61	4.31	7.54	9.37	8.55	9.41	0.21	7.46
TRINITY_DN39053_c2_g4	K05917	EC:1.14.13.70	-2.03083	down	CYP51G1	obtusifoliol 14alpha-demethylase [Solanum chacoense]	8.4	6.28	11.34	8.49	11.77	7.19	41.78	41.06	60.98	46.93	53.98	54.99	8.91	49.95
TRINITY_DN39068_c0_g1	K03850	EC:2.4.1.256	-1.27417	down	ALG10	dol-P-Glc:Glc(2)Man(9)GlcNAc(2)-PP-Dol alpha-1,2-glucosyltransferase isoform X3 [Manihot esculenta]	2.78	3.55	3.65	5.93	2.28	2.4	12.45	12.14	12.23	6.81	6.08	6.36	3.43	9.35
TRINITY_DN39071_c0_g1	K00847	EC:2.7.1.4	-2.2971	down	FLN1	fructokinase-like 1, chloroplastic [Hevea brasiliensis]	1.17	1.42	3.86	0.99	2.26	1.54	13.67	11.58	14.14	12.05	9.61	11.98	1.87	12.17
TRINITY_DN39079_c3_g1	K12471	-	1.20328	up	EPSIN2	PREDICTED: clathrin interactor EPSIN 2 [Eucalyptus grandis]	50.21	90.61	32.96	76.47	42.93	59.81	23.79	31.87	36.59	33.35	37.02	41.38	58.83	34
TRINITY_DN39079_c3_g2	K12471	-	1.6927	up	EPSIN2	clathrin interactor EPSIN 2 isoform X2 [Abrus precatorius]	44.9	56.29	36.58	54.31	31.83	33.73	11.62	12.02	12.24	10.14	8.73	9.71	42.94	10.74
TRINITY_DN39103_c0_g1	K13416	EC:2.7.10.1 2.7.11.1	-1.83829	down	SERK1	leucine-rich repeat protein 1-like [Hevea brasiliensis]	1.86	1.18	0.69	1	1.53	0.42	1.74	4.71	3.15	6.9	7.2	9.78	1.11	5.58
TRINITY_DN39116_c0_g1	K14682	EC:2.3.1.1	2.13021	up	NAGS1	probable amino-acid acetyltransferase NAGS2, chloroplastic isoform X1 [Citrus sinensis]	8.98	6.37	15.1	9.37	4.84	7.89	2.11	2.08	3.07	2.57	2.94	3.66	8.76	2.74
TRINITY_DN39132_c0_g1	K20558	-	7.98472	up	FAMA	HLH domain-containing protein [Cephalotus follicularis]	2.72	4.85	7.43	7.83	3.25	5.14	0	0.1	0	0	0	0	5.2	0.02
TRINITY_DN39133_c0_g1	K05666	-	1.55089	up	ABCC14	ABC transporter C family member 4-like [Manihot esculenta]	42.87	29.35	12.74	22.63	17.86	23.38	9.71	13.04	11.35	11.8	8.83	12.91	24.8	11.27
TRINITY_DN39143_c0_g2	K13993	-	-2.67273	down	HSP18.1	class I heat shock protein 3 [Zea mays]	0.37	0.38	0.69	1.13	0.16	0.17	5.21	4.39	3.66	3.49	4.93	3.55	0.48	4.21
TRINITY_DN39143_c2_g9	K00031	EC:1.1.1.42	2.41042	up	TOC159	translocase of chloroplast 159, chloroplastic, partial [Sesamum indicum]	0.1	0.11	0.17	0.17	0.07	0.15	0.02	0.03	0.01	0.01	0.06	0.06	0.13	0.03
TRINITY_DN39147_c0_g1	K12471	-	1.47102	up	EPSIN2	Epsin-2, putative [Ricinus communis]	59.81	97.69	43.68	77.01	53.32	59.51	26.27	30.71	27.56	31.43	30.18	32.42	65.17	29.76
TRINITY_DN39156_c0_g1	K13606	EC:1.1.1.294	-1.99813	down	NYC1	probable chlorophyll(ide) b reductase NYC1, chloroplastic isoform X2 [Amborella trichopoda]	2.5	5.27	3.69	4.27	4.18	7.38	42.82	34.69	13.6	12.1	15.9	20.94	4.55	23.34
TRINITY_DN39161_c0_g1	K00514	EC:1.3.5.6	-1.18113	down	-	zeta-carotene desaturase [Citrus unshiu]	3.49	5.48	4.27	3.89	5.4	8.76	17.3	14.5	14.81	12.02	13.97	13.89	5.21	14.41
TRINITY_DN39167_c0_g1	K11423	EC:2.1.1.43	-5.08054	down	ASHH3	SET domain-containing protein [Cephalotus follicularis]	0.3	0.44	0	0.27	0	0	8.92	9.53	5.85	8.76	9.75	8.8	0.17	8.6
TRINITY_DN39218_c1_g3	K03231	-	1.16146	up	-	uncharacterized protein LOC7491309 [Populus trichocarpa]	72.52	94.62	53.61	81.62	54.69	78.4	38.78	45.79	37.43	39.4	33.84	33.71	72.58	38.16
TRINITY_DN39231_c0_g1	K00648	EC:2.3.1.180	-1.444	down	KAS3A	3-oxoacyl-[acyl-carrier-protein] synthase 3 B, chloroplastic-like isoform X4 [Durio zibethinus]	1.25	5	2.72	1.45	2.56	0.98	11.52	13.38	11.4	13.94	12.07	11.75	2.33	12.34
TRINITY_DN39234_c0_g1	K00281	EC:1.4.4.2	-2.15695	down	GLDP1	glycine dehydrogenase (decarboxylating), mitochondrial [Populus trichocarpa]	8.11	9.63	19.33	6.97	16.53	5.29	84.5	74.18	56.77	48.69	44.89	77.38	10.98	64.4
TRINITY_DN39247_c0_g1	K08336	-	-1.13042	down	ATG12	hypothetical protein JCGZ_24706 [Jatropha curcas]	4.49	6.78	2.02	4.29	5.97	5.31	10.25	12.76	15.07	15.98	13.9	15.1	4.81	13.84
TRINITY_DN39276_c0_g1	K01183	EC:3.2.1.14	-3.41547	down	At1g62350	pentatricopeptide repeat-containing protein At1g62350-like [Hevea brasiliensis]	0.26	1.18	0.65	1.42	1.51	0.8	15.65	14.59	11.97	15.2	10.62	11.67	0.97	13.28
TRINITY_DN39286_c1_g1	K13459	-	-1.69323	down	-	uncharacterized protein LOC18108538 [Populus trichocarpa]	10.52	11.44	13.52	10.07	10.76	8.86	34.8	49.1	29.66	35.05	35.03	34.28	10.86	36.32
TRINITY_DN39286_c1_g6	K13459	-	1.23457	up	-	hypothetical protein POPTR_005G042900 [Populus trichocarpa]	11.53	21.99	18.48	22.91	13.44	14.75	5.97	11.72	8.3	9.35	10.05	11.92	17.18	9.55
TRINITY_DN39286_c1_g9	K13459	-	-1.85762	down	-	hypothetical protein POPTR_005G042900 [Populus trichocarpa]	1.76	0.9	1.61	1.76	0.67	1.11	4.28	6.09	4.96	7.5	9.07	5.42	1.3	6.22
TRINITY_DN39313_c4_g1	K00549	EC:2.1.1.14	2.13807	up	FTIP1	FT-interacting protein 1 [Sesamum indicum]	0.08	0.07	0.11	0.26	0.11	0.23	0.04	0.05	0	0	0.08	0.08	0.14	0.04
TRINITY_DN39315_c0_g7	K03283	-	2.01306	up	HSP70	stromal 70 kDa heat shock-related protein, chloroplastic-like [Sesamum indicum]	0.4	0.46	0.59	0.96	1.03	0.75	0.2	0.3	0	0.09	0.2	0.53	0.7	0.22
TRINITY_DN39331_c1_g7	K13459	-	-3.39929	down	WRKY70	probable WRKY transcription factor 70 [Hevea brasiliensis]	11.95	6.13	15.04	6.27	6.21	5.87	2.43	13.28	92.72	50.86	317.46	227.48	8.58	117.37
TRINITY_DN39342_c1_g1	K00688	EC:2.4.1.1	1.59102	up	-	alpha-glucan phosphorylase, H isozyme [Sesamum indicum]	0.07	0.08	0.2	0.31	0.26	0.19	0.06	0.1	0.11	0.06	0.16	0.17	0.19	0.11
TRINITY_DN39362_c2_g6	K00033	EC:1.1.1.44 1.1.1.343	3.34672	up	At3g02360	6-phosphogluconate dehydrogenase, decarboxylating 3 [Ricinus communis]	265.38	236.01	335.2	305.69	231.66	248.76	24.68	21.71	48.21	32.73	53.76	37.46	270.45	36.42
TRINITY_DN39396_c0_g1	K04710	EC:2.3.1.24	1.42657	up	At1g13580	LAG1 longevity assurance homolog 3-like isoform X1 [Hevea brasiliensis]	10.44	8.38	7.84	2.16	6.71	6.97	1.27	0.69	3.85	2.2	2.81	4.38	7.08	2.53
TRINITY_DN39409_c0_g7	K00279	EC:1.5.99.12	3.86161	up	CKX5	cytokinin dehydrogenase 5 [Populus trichocarpa]	1.56	0.08	7.06	1.21	0.51	0.62	0.2	0.51	0	0	0.08	0.3	1.84	0.18
TRINITY_DN39415_c1_g3	K00232	EC:1.3.3.6	1.31736	up	ACX1.2	acyl-CoA oxidase [Glycine max]	18.9	4.14	21.59	11.05	5.35	8.03	0.38	1.12	11.56	5.16	10.06	9.9	11.51	6.36
TRINITY_DN39442_c2_g2	K01870	EC:6.1.1.5	4.38506	up	DIR21	PREDICTED: dirigent protein 22-like [Populus euphratica]	23.27	23.17	10.57	29.73	53.39	45.52	1.64	0.87	1.79	3.57	1.58	2.12	30.94	1.93
TRINITY_DN39442_c2_g3	K01870	EC:6.1.1.5	4.50805	up	DIR21	PREDICTED: dirigent protein 22-like [Populus euphratica]	83.15	22.78	26.65	9.76	31.73	22.32	0.15	1.01	2.64	1.25	3.08	3.2	32.73	1.89
TRINITY_DN39442_c2_g6	K01187	EC:3.2.1.20	7.19826	up	CBDAS2	berberine bridge enzyme-like 15 [Populus trichocarpa]	414.9	56.2	485.54	42.14	95.4	205.27	2.2	0.9	2.59	1.58	1.95	2.52	216.58	1.96
TRINITY_DN39456_c0_g1	K13496	EC:2.4.1.-	-1.61414	down	UGT89A2	UDP-glycosyltransferase 89A2-like [Hevea brasiliensis]	2.06	1.73	0.38	1.4	1.53	1.32	4.18	3.56	5.67	6.43	6.38	6.65	1.4	5.48
TRINITY_DN39457_c0_g1	K12897	-	1.43641	up	SR45A	serine/arginine-rich splicing factor SR45a [Sesamum indicum]	0.18	0.22	0.24	0.42	0.17	0.42	0.08	0.08	0.14	0.02	0.28	0.14	0.27	0.12
TRINITY_DN39463_c0_g1	K14452	EC:3.1.1.3	2.26154	up	LIP2	triacylglycerol lipase 2 precursor [Ricinus communis]	2.93	2.94	4.35	2.27	2.91	6.14	0.9	0.5	0.83	1.87	0.68	1.38	3.59	1.03
TRINITY_DN39467_c0_g3	K01100	EC:3.1.3.37	1.92644	up	At3g55800	PREDICTED: sedoheptulose-1,7-bisphosphatase, chloroplastic [Erythranthe guttata]	1.32	1.02	1.91	1.74	1.51	1.29	0.64	0.5	0.22	0.15	0.83	0.81	1.46	0.53
TRINITY_DN39474_c0_g5	K00432	EC:1.11.1.9	-1.51805	down	GPX8	probable glutathione peroxidase 8 [Ricinus communis]	6.12	11.17	8.09	7.48	5.65	4.37	22.75	20.91	28.07	26	34.39	30.85	7.15	27.16
TRINITY_DN39475_c0_g1	K13448	-	1.65077	up	CML35	probable calcium-binding protein CML36 [Manihot esculenta]	196.92	191.45	194.69	339.5	367.6	276.14	33.17	36.06	73.33	111.37	237.16	145.4	261.05	106.08
TRINITY_DN39475_c0_g2	K02694	-	5.2678	up	PSAF	PREDICTED: photosystem I reaction center subunit III, chloroplastic-like [Nicotiana attenuata]	0.42	1.3	13.24	0.43	6.76	0.39	0.42	0.83	0.42	0.4	0	0	3.76	0.34
TRINITY_DN39475_c0_g3	K02694	-	2.25532	up	PSAF	photosystem I reaction center subunit III, chloroplastic [Sesamum indicum]	0.93	0.96	2.8	2.23	1.58	1.17	0.27	1.33	0	0	0.4	0.64	1.61	0.44
TRINITY_DN39475_c0_g6	K13448	-	1.28919	up	CML35	Calmodulin and related proteins (EF-Hand superfamily) [Handroanthus impetiginosus]	1.09	1.91	1.86	1.67	1.62	2.04	0.47	0.34	0.8	1.01	1.1	1.61	1.7	0.89
TRINITY_DN39503_c2_g1	K03363	-	8.17321	up	-	uncharacterized protein LOC8258498 [Ricinus communis]	6.62	2.61	95.7	11.69	22.81	29.35	0	0	0.18	0.17	0	0.35	28.13	0.12
TRINITY_DN39509_c0_g1	K02986	-	-1.60165	down	INVE	Six-hairpin glycosidase-like protein [Corchorus olitorius]	3.01	4.25	2.26	2.62	4.68	4.16	15.31	14.94	13.5	12.72	11.09	13.12	3.5	13.45
TRINITY_DN39512_c0_g2	K17879	EC:3.6.1.-	-1.34911	down	NUDT15	nudix hydrolase 15, mitochondrial [Jatropha curcas]	10.01	13.02	4.3	6.68	7.17	8.04	26.36	31.21	26.81	27.47	20.79	27.79	8.2	26.74
TRINITY_DN39524_c0_g6	K00083	EC:1.1.1.195	1.46541	up	CAD1	probable mannitol dehydrogenase [Sesamum indicum]	0.77	0.82	0.82	0.79	0.85	0.59	0.23	0.23	0.19	0.21	0.41	0.89	0.77	0.36
TRINITY_DN39528_c1_g4	K13347	-	-1.42469	down	mpv17	protein sym-1 [Populus trichocarpa]	12	23.41	11.08	13.35	21.01	14.54	62.09	56.55	66.99	63.66	56.79	60.44	15.9	61.09
TRINITY_DN39528_c1_g6	K01054	EC:3.1.1.23	7.16327	up	-	PREDICTED: caffeoylshikimate esterase-like isoform X1 [Juglans regia]	3.95	1.82	21.73	5.38	7.18	3.65	0	0	0.23	0.29	0	0.27	7.29	0.13
TRINITY_DN39534_c0_g1	K14682	EC:2.3.1.1	4.11804	up	NAGS2	probable amino-acid acetyltransferase NAGS1, chloroplastic isoform X1 [Jatropha curcas]	23.95	12.57	43.52	26.1	10.7	15.13	2.26	0.64	3.1	0.75	2.53	0.75	22	1.67
TRINITY_DN39537_c0_g4	K02109	-	1.77222	up	ATPG	hypothetical protein CDL12_03272 [Handroanthus impetiginosus]	0.31	0.5	0.87	0.76	0.59	0.61	0.41	0.2	0.03	0	0.42	0.3	0.61	0.23
TRINITY_DN39543_c0_g2	K12173	-	7.06528	up	TL1	thaumatin-like protein 1 [Manihot esculenta]	3.01	5.68	3.85	4.25	6.71	2.05	0	0.06	0	0.03	0.06	0.06	4.26	0.03
TRINITY_DN39544_c2_g4	K00858	EC:2.7.1.23	-1.0766	down	NADK1	NAD(H) kinase 1 isoform X2 [Populus trichocarpa]	1.37	1.69	1.84	1.08	2.16	1.29	3.17	6.23	4.28	3.68	5.61	3.45	1.57	4.4
TRINITY_DN39553_c1_g1	K14293	-	-1.16201	down	KPNB1	unnamed protein product, partial [Vitis vinifera]	4.97	5.82	1.08	3.79	3.64	4.41	9.59	12.65	12.26	10.36	11.54	10.41	3.95	11.13
TRINITY_DN39571_c4_g2	K13459	-	-3.49488	down	WRKY70	probable WRKY transcription factor 70 [Hevea brasiliensis]	32.18	14.38	17.05	26.32	22.41	16.69	16.2	53.38	311.5	409.11	562.84	623.31	21.5	329.39
TRINITY_DN39575_c0_g2	K21797	EC:3.1.3.-	-2.03824	down	SAC6	phosphoinositide phosphatase SAC6-like [Hevea brasiliensis]	4.51	4.99	4.21	3.23	3.63	3.21	17.45	14.92	14.71	15.89	15.76	16.1	3.96	15.81
TRINITY_DN39584_c1_g1	K01626	EC:2.5.1.54	2.06872	up	DHS2	phospho-2-dehydro-3-deoxyheptonate aldolase 2, chloroplastic [Sesamum indicum]	0.09	0.18	0.43	0.41	0.27	0.29	0.04	0.17	0.08	0.04	0.18	0.18	0.28	0.11
TRINITY_DN39585_c0_g1	K03661	-	1.03305	up	Atp6v0b	V-type proton ATPase proteolipid subunit [Tetrabaena socialis]	1.93	0.83	1.94	1.64	1.69	3.18	0.91	0.36	1.08	0.9	1.34	1.99	1.87	1.1
TRINITY_DN39594_c0_g1	K14513	-	-1.94679	down	EIN2	PREDICTED: ethylene-insensitive protein 2-like [Populus euphratica]	10.81	5.89	14.33	4.94	5.73	5.31	57.13	49.8	31.95	34.01	26.25	48.1	7.84	41.21
TRINITY_DN39599_c0_g2	K01191	EC:3.2.1.24	1.19109	up	-	uncharacterized protein LOC105639322 isoform X1 [Jatropha curcas]	14.09	20.29	17.82	14.4	13.59	13.35	9	9.9	8.25	10.12	6.78	9.24	15.59	8.88
TRINITY_DN39605_c2_g3	K01188	EC:3.2.1.21	-1.41604	down	At3g49720	uncharacterized protein At3g49720-like isoform X2 [Hevea brasiliensis]	0.53	0.94	1.62	1.36	2.92	1.17	4	5.54	6.24	7.13	4.68	5.48	1.42	5.51
TRINITY_DN39618_c2_g1	K00921	EC:2.7.1.150	2.36688	up	-	putative 1-phosphatidylinositol-3-phosphate 5-kinase FAB1D [Jatropha curcas]	6.56	16.96	19.57	21.99	15.1	13.48	3.88	2.73	8.24	1.56	3.84	4.23	15.61	4.08
TRINITY_DN39634_c0_g1	K05658	EC:3.6.3.44	1.28849	up	ABCB20	ABC transporter B family member 6-like [Cucurbita maxima]	9.66	16.21	8.39	14.38	14.16	11.21	6.48	7.57	6.31	6.42	4.97	7.02	12.34	6.46
TRINITY_DN39638_c0_g1	K12837	-	1.04121	up	U2AF2	PREDICTED: splicing factor U2af large subunit A-like isoform X4 [Nicotiana tomentosiformis]	2.23	1.68	0.42	2.89	1.26	1.22	0.77	0.7	2	1.65	1.55	2.74	1.62	1.57
TRINITY_DN39650_c0_g1	K01092	EC:3.1.3.25	-3.55233	down	IMPL1	hypothetical protein JCGZ_00142 [Jatropha curcas]	0.41	0.33	0.22	0.54	0.26	0.37	6.34	6.39	4.25	5.71	4.73	4.97	0.35	5.4
TRINITY_DN39656_c0_g2	K00600	EC:2.1.2.1	-2.60149	down	-	conserved hypothetical protein [Ricinus communis]	0.9	3.1	1.45	1.37	2.31	1.58	23.29	21.16	8.83	12.39	7.03	9.85	1.79	13.76
TRINITY_DN39656_c0_g3	K00600	EC:2.1.2.1	-4.05733	down	-	conserved hypothetical protein [Ricinus communis]	0.19	0.1	0.18	0.1	0	0.19	3.19	2.56	2.91	4.24	1.97	2.83	0.13	2.95
TRINITY_DN39657_c2_g7	K14513	-	-1.30814	down	EIN2	PREDICTED: ethylene-insensitive protein 2-like [Populus euphratica]	5.05	4.46	5.8	2.95	5.93	3.99	20.34	19.6	11.43	13.12	11.14	14.89	4.7	15.09
TRINITY_DN39660_c2_g1	K12446	EC:2.7.1.46	-4.28421	down	ARA1	PREDICTED: L-arabinokinase-like [Nelumbo nucifera]	0.48	0.33	0.5	0.13	0.31	0.35	9.02	9.55	6.86	8.95	4.4	7.31	0.35	7.68
TRINITY_DN39662_c1_g1	K00860	EC:2.7.1.25	1.60251	up	AKN	Adenosine 5'-phosphosulfate kinase [Handroanthus impetiginosus]	0.61	1.12	1.23	1.21	1.47	1.38	0.54	0.36	0.36	0.1	0.36	1.36	1.17	0.51
TRINITY_DN39662_c1_g6	K00860	EC:2.7.1.25	6.83533	up	APK2	Adenylylsulfate kinase [Corchorus olitorius]	0.82	0.06	8.69	0.28	0.89	0.57	0	0	0.03	0	0.06	0.03	1.89	0.02
TRINITY_DN39668_c0_g1	K01968	EC:6.4.1.4	-3.23539	down	MCCA	hypothetical protein DVH24_027053 [Malus domestica]	1.81	2.53	2.65	1.04	1.05	1.3	16.1	15.07	20.12	13.38	8.82	16.81	1.73	15.05
TRINITY_DN39682_c2_g6	K18880	EC:5.3.3.8	2.64696	up	ECI2	enoyl-CoA delta isomerase 2, peroxisomal-like [Hevea brasiliensis]	36.24	30.64	33.21	38.57	27.58	29.61	5.96	5.54	6.66	8.06	6.27	8.52	32.64	6.83
TRINITY_DN39695_c0_g2	K02923	-	2.03496	up	RPL38A	60S ribosomal protein L38 [Populus trichocarpa]	7.85	7.1	6.83	4.43	4.69	8.93	1.81	2.33	1.43	3.06	2.31	1.82	6.64	2.13
TRINITY_DN39696_c0_g1	K10703	EC:4.2.1.134	-2.26436	down	-	very-long-chain (3R)-3-hydroxyacyl-CoA dehydratase 2 [Populus trichocarpa]	2.23	2.11	5.4	1.95	5.42	3.65	30.54	27.41	25.55	27.19	14.99	17.49	3.46	23.86
TRINITY_DN39718_c1_g7	K15398	EC:1.14.-.-	2.54093	up	CYP86A4	cytochrome P450 86A8 [Jatropha curcas]	5.89	2.69	7.7	4.32	1.25	2.44	0.24	1.17	2.83	0.22	0.24	0.92	4.05	0.94
TRINITY_DN39747_c0_g1	K02888	-	-1.46996	down	RPL21M	50S ribosomal protein L21, mitochondrial [Jatropha curcas]	5.99	7.23	2.95	4.68	6.15	5.13	20.26	22.4	19.57	19.95	14.63	16.11	5.36	18.82
TRINITY_DN39761_c4_g4	K01051	EC:3.1.1.11	6.74943	up	PME28	probable pectinesterase/pectinesterase inhibitor 21 [Hevea brasiliensis]	2.2	0.31	5.55	1.13	0.57	0.91	0	0	0	0.07	0	0	1.78	0.01
TRINITY_DN39761_c6_g1	K00297	EC:1.5.1.20	-1.44053	down	Os03g0815200	hypothetical protein EUGRSUZ_A00394 [Eucalyptus grandis]	1.21	1.67	2.24	1.59	2.4	1.22	4.23	5.71	6.16	6.77	5.81	8.34	1.72	6.17
TRINITY_DN39772_c1_g2	K02266	-	3.29501	up	COX6A	cytochrome c oxidase subunit 6a, mitochondrial [Herrania umbratica]	9.89	2.88	7.33	2.64	1.61	7.11	0.63	0.5	1.01	0.33	0.69	2.07	5.24	0.87
TRINITY_DN39774_c1_g2	K02939	-	-1.23396	down	RPL9	50S ribosomal protein L9, chloroplastic-like [Ziziphus jujuba]	24.75	40.48	30.62	36.32	61.55	36.43	123.91	111.71	124.23	115.61	90.28	117.42	38.36	113.86
TRINITY_DN39779_c0_g1	K13424	-	2.52922	up	-	probable WRKY transcription factor 33 [Populus trichocarpa]	13.7	5.15	19.64	5.22	4.5	7.14	0	0	6.9	0.59	1.25	4.21	9.22	2.16
TRINITY_DN39779_c0_g5	K13424	-	2.3937	up	WRKY24	probable WRKY transcription factor 33 [Hevea brasiliensis]	283.02	99.2	174.56	116.75	127.05	125.25	1.78	1.21	39.96	26.87	93.95	71.29	154.3	39.18
TRINITY_DN39792_c0_g1	K13473	-	2.82489	up	LYM2	lysM domain-containing GPI-anchored protein 2 isoform X1 [Jatropha curcas]	25.57	27.35	30.94	29.16	36.42	16.65	2.29	3.01	6.24	6.65	4.04	7.3	27.68	4.92
TRINITY_DN39804_c2_g1	K20538	EC:2.7.11.24	-1.22229	down	MPK20	mitogen-activated protein kinase 15-like isoform X1 [Arachis hypogaea]	0.86	1.52	1.28	0.91	1.41	2.01	3.34	5.39	3.95	5.44	3.94	2.75	1.33	4.14
TRINITY_DN39805_c0_g1	K00434	EC:1.11.1.11	1.54353	up	APX3	peroxisomal ascorbate peroxidase [Avicennia marina]	0.26	0.56	0.75	1	0.55	0.45	0.17	0.26	0.2	0.03	0.53	0.54	0.6	0.29
TRINITY_DN39806_c1_g2	K14156	EC:2.7.1.32 2.7.1.82	1.52036	up	CK1	probable choline kinase 1 isoform X2 [Hevea brasiliensis]	22.35	37.04	59.11	41.76	31.77	24.88	7.32	11.53	24.17	12.82	6.67	20.63	36.15	13.86
TRINITY_DN39812_c3_g2	K14565	-	1.63769	up	NOP5-2	probable nucleolar protein 5-1 isoform X2 [Hevea brasiliensis]	7.97	6.62	5.12	4.85	6.73	5.66	3.4	2.84	1.23	2.9	1.51	1.42	6.16	2.22
TRINITY_DN39824_c0_g1	K01507	EC:3.6.1.1	1.36828	up	-	pyrophosphate-energized vacuolar membrane proton pump-like [Dorcoceras hygrometricum]	37.13	73.79	36.98	46.08	70.4	58.32	20.32	25.65	24.39	27.27	31.83	25.12	53.78	25.76
TRINITY_DN39829_c0_g2	K04124	EC:1.14.11.15	-2.3871	down	SRG1	protein SRG1-like [Hevea brasiliensis]	10.19	15.41	9.29	9.94	26.62	15.22	92.98	74.16	61.76	60.18	43.29	47.06	14.45	63.24
TRINITY_DN39834_c0_g1	K03362	-	-3.88367	down	JGB	protein JINGUBANG-like [Manihot esculenta]	0.04	0	0.13	0	0.07	0.14	1.9	2.04	0.95	3.79	0.07	0.72	0.06	1.58
TRINITY_DN39838_c0_g3	K15718	EC:1.13.11.58	1.45072	up	LOX1.5	probable linoleate 9S-lipoxygenase 5 isoform X1 [Sesamum indicum]	0.15	0.11	0.33	0.31	0.25	0.33	0.11	0.07	0.05	0.01	0.15	0.31	0.25	0.12
TRINITY_DN39839_c0_g1	K01099	EC:3.1.3.36	-1.3674	down	IP5P12	LOW QUALITY PROTEIN: type I inositol polyphosphate 5-phosphatase 12 [Ricinus communis]	0.91	0.97	1.44	1.35	0.8	1.11	5.26	6.11	3.35	3.44	1.75	3.66	1.1	3.93
TRINITY_DN39840_c2_g2	K14376	EC:2.7.7.19	-1.48677	down	PAPS4	hypothetical protein DVH24_027405 [Malus domestica]	2.87	11.54	6.14	5.83	5.24	7.26	37.37	20.43	27.61	20.16	25.53	27.75	6.48	26.47
TRINITY_DN39840_c2_g3	K14376	EC:2.7.7.19	-1.04574	down	PAPS2	nuclear poly(A) polymerase 4-like [Hevea brasiliensis]	7.33	8.83	2.71	6.27	6.02	6.21	27.09	20.39	21.95	16.2	18.35	16.91	6.23	20.15
TRINITY_DN39857_c0_g4	K01728	EC:4.2.2.2	-3.88503	down	At1g67750	PREDICTED: probable pectate lyase 5 [Populus euphratica]	0.43	0	1.81	0	4.2	1.01	12.17	8.98	17.35	95.7	3	25.19	1.24	27.06
TRINITY_DN39868_c0_g1	K00030	EC:1.1.1.41	-1.12867	down	IDH1	Isocitrate dehydrogenase, gamma subunit [Handroanthus impetiginosus]	5.08	12.27	2	9.09	4.41	4.33	18.17	17.55	14.82	21.86	16.97	16.05	6.2	17.57
TRINITY_DN39868_c0_g8	K00030	EC:1.1.1.41	2.76698	up	IDH1	isocitrate dehydrogenase [NAD] regulatory subunit 1, mitochondrial isoform X1 [Jatropha curcas]	123.22	126.67	102.28	134.9	112	93.37	20.09	17.93	23.05	21.81	24.48	25.29	115.41	22.11
TRINITY_DN39877_c3_g6	K01792	EC:5.1.3.15	1.27674	up	-	putative glucose-6-phosphate 1-epimerase [Manihot esculenta]	41.15	44.94	19.97	29.83	48.35	45.53	16.46	21.52	19.45	28.59	18.88	25.07	38.29	21.66
TRINITY_DN39881_c1_g15	K02135	-	-2.03025	down	-	ATP synthase subunit epsilon, mitochondrial [Solanum lycopersicum]	2.14	3.19	0.87	1.08	1.21	1.01	8.78	7.35	6.34	9.88	9.78	8.97	1.58	8.52
TRINITY_DN39884_c0_g11	K03062	-	3.99573	up	RPT2A	hypothetical protein CDL15_Pgr020095 [Punica granatum]	3.82	9.68	4.78	7.6	3.78	5.42	0.86	0.21	0.21	0.81	0.21	0.41	5.85	0.45
TRINITY_DN39884_c0_g12	K03062	-	1.03005	up	RPT2A	26S proteasome regulatory subunit 4 homolog A-like [Phoenix dactylifera]	101.94	119.09	59.96	94.93	55.91	74.05	46.99	58.92	46.34	62.23	60.39	54.41	84.31	54.88
TRINITY_DN39886_c0_g1	K13675	EC:2.4.1.-	-1.50904	down	-	LOW QUALITY PROTEIN: uncharacterized protein LOC8277705 [Ricinus communis]	4.12	1.48	5.96	1.35	1.96	1.18	15.43	12.42	13.8	9.92	10.54	9.82	2.67	11.99
TRINITY_DN39893_c1_g3	K00264	EC:1.4.1.13 1.4.1.14	3.95389	up	-	glutamate synthase 1 [NADH], chloroplastic-like [Hevea brasiliensis]	29.58	42.01	56.81	49.78	43.54	30.01	4.73	4.91	2.69	3.3	1.88	3.59	41.95	3.52
TRINITY_DN39906_c0_g1	K02879	-	-2.75336	down	RPL17	50S ribosomal protein L17, chloroplastic isoform X1 [Hevea brasiliensis]	10.54	17.81	7.13	13.19	30.78	22.84	177.39	169.81	160.49	139.82	101.05	134.72	17.05	147.21
TRINITY_DN39906_c0_g3	K02879	-	1.95289	up	RPL17	50S ribosomal protein L17, chloroplastic [Populus trichocarpa]	4.12	0.87	20.49	1.69	1.17	4.1	3.54	2.16	3.64	0.97	0.17	0.98	5.41	1.91
TRINITY_DN39920_c1_g2	K15422	EC:3.1.3.7 3.1.3.57	1.42628	up	-	SAL1 phosphatase [Sesamum indicum]	0.3	1.01	0.73	0.82	0.84	0.69	0.61	0.3	0.07	0.19	0.3	0.94	0.73	0.4
TRINITY_DN39927_c1_g1	K02699	-	8.48638	up	PSAL	PREDICTED: photosystem I reaction center subunit XI, chloroplastic-like [Nicotiana attenuata]	0	0	14.35	0	7.33	0	0	0	0	0	0	0	3.61	0
TRINITY_DN39934_c0_g1	K12125	-	-3.02346	down	ELF3-2	protein HEADING DATE 3B-like isoform X1 [Hevea brasiliensis]	1.31	1.18	1.16	0.95	1.41	1.55	16.24	21.01	9.58	10.91	6.7	8.7	1.26	12.19
TRINITY_DN39954_c1_g2	K14513	-	-1.77601	down	EIN2	ethylene-insensitive protein 2-like [Hevea brasiliensis]	1.62	2	1.64	1.03	1.11	1.8	5.98	9.12	4.4	6.14	5.3	6.09	1.53	6.17
TRINITY_DN39954_c1_g6	K14513	-	-3.61952	down	EIN2	ethylene-insensitive protein 2-like [Hevea brasiliensis]	0.59	0.43	1.17	0.67	0.42	0.5	15.73	12.88	5.56	9.12	6.38	11.19	0.63	10.14
TRINITY_DN39959_c0_g5	K01915	EC:6.3.1.2	6.89091	up	GLN2	PREDICTED: glutamine synthetase, chloroplastic [Nicotiana tomentosiformis]	0	0	4.52	0	1.99	0	0	0	0	0	0	0	1.08	0
TRINITY_DN39959_c1_g1	K01915	EC:6.3.1.2	-1.46982	down	-	Gln-synt_C domain-containing protein/Gln-synt_N domain-containing protein [Cephalotus follicularis]	221.59	172.73	155.55	162.54	332.82	249.89	620.62	750.24	790.37	893.67	736.99	1035.31	215.85	804.53
TRINITY_DN39974_c0_g2	K07374	-	2.36782	up	TUBA3	tubulin alpha chain [Abrus precatorius]	10.19	3.88	14.96	5.59	40.57	19.77	1.53	1.79	4.57	7.99	0.95	7.98	15.83	4.14
TRINITY_DN39980_c0_g3	K08232	EC:1.6.5.4	-2.36724	down	MDAR4	monodehydroascorbate reductase 4, peroxisomal-like isoform X1 [Hevea brasiliensis]	1.87	4.81	3.51	3.84	8.96	4.5	40	41.32	26.47	25.05	23.23	26.27	4.58	30.39
TRINITY_DN39992_c5_g3	K05298	EC:1.2.1.13	9.18918	up	GAPA	PREDICTED: glyceraldehyde-3-phosphate dehydrogenase A, chloroplastic [Nicotiana sylvestris]	0	0	9.74	0	6.19	0	0	0	0	0	0	0	2.65	0
TRINITY_DN39994_c0_g1	K02155	-	-1.59292	down	VHA-c1	PREDICTED: V-type proton ATPase subunit c1 [Brassica rapa]	0.95	0.69	0.65	1.38	1.56	0.63	8.76	4.32	3.58	2.26	1.44	2.19	0.98	3.76
TRINITY_DN40011_c2_g1	K02694	-	2.36139	up	PSAF	Photosystem I [Handroanthus impetiginosus]	1.66	1.78	4.4	4.74	3	3.85	1.12	0.77	0	0	1.27	1.79	3.24	0.83
TRINITY_DN40012_c0_g1	K06133	EC:2.7.8.-	-1.53601	down	Aasdhppt	L-aminoadipate-semialdehyde dehydrogenase-phosphopantetheinyl transferase-like isoform X1 [Hevea brasiliensis]	2.05	2	0.85	1.77	2.29	1.97	6.95	7.29	5.27	9.43	4.93	6.75	1.82	6.77
TRINITY_DN40014_c0_g1	K14317	-	1.36083	up	NUP1	nuclear pore complex protein NUP1 [Hevea brasiliensis]	32.32	39.21	25.09	38.2	26.48	27.15	14.2	16.46	15.2	17.56	15.08	15.65	31.41	15.69
TRINITY_DN40015_c0_g2	K10661	EC:2.3.2.27	1.84279	up	-	uncharacterized protein LOC105630440 [Jatropha curcas]	130.42	94.64	80.08	61.87	68.95	90.01	11.65	17.84	59.51	11.85	39.62	36.25	87.66	29.45
TRINITY_DN40054_c1_g5	K02155	-	1.23274	up	VMAC1	hypothetical protein DVH24_021355 [Malus domestica]	99.3	174.29	101.04	128.15	144.4	153.22	46.41	69.86	79.13	88.38	68.15	98.48	133.4	75.07
TRINITY_DN40054_c1_g6	K02155	-	2.27532	up	VHA-c1	V-type proton ATPase 16 kDa proteolipid subunit [Dorcoceras hygrometricum]	15.27	14.45	14.48	14.34	10.35	10.58	3.94	3.7	3.65	2.89	3.65	3.47	13.24	3.55
TRINITY_DN40075_c0_g1	K02210	EC:3.6.4.12	3.02979	up	MCM7	DNA replication licensing factor MCM7 isoform X1 [Manihot esculenta]	0.75	0.65	1.19	0.3	1.43	1.44	0	0.11	0.11	0.31	0.17	0.26	0.96	0.16
TRINITY_DN40086_c2_g1	K00765	EC:2.4.2.17	-2.6872	down	HISN1A	ATP phosphoribosyltransferase 2, chloroplastic [Momordica charantia]	0	0.2	0.11	1.64	0	0.43	1.12	0.38	4.16	1.27	9.22	2.36	0.4	3.08
TRINITY_DN40093_c0_g1	K04710	EC:2.3.1.24	5.63831	up	-	-	133.5	112.75	283.68	174.98	106.39	96.05	1.12	1.71	7.07	2.86	6.89	5.18	151.22	4.14
TRINITY_DN40098_c0_g4	K00012	EC:1.1.1.22	1.85757	up	-	UDP-glucose 6-dehydrogenase 5 [Zea mays]	41.79	27.86	25.87	15.11	26.92	29.52	0.78	1.43	5.11	20.68	20.5	13.65	27.85	10.36
TRINITY_DN40099_c1_g3	K13065	EC:2.3.1.133	-2.17762	down	HCT4	protein ECERIFERUM 26-like [Populus trichocarpa]	3.04	0.77	1.72	0.21	1.65	2.31	12.44	16.47	5.93	11.1	3.87	7.42	1.62	9.54
TRINITY_DN40100_c0_g1	K03965	-	-2.23597	down	CIB22	hypothetical protein B456_008G032000 [Gossypium raimondii]	0.72	0.48	0.38	0.23	0.47	0.2	1.27	1.62	2.22	2.62	1.24	1.7	0.41	1.78
TRINITY_DN40101_c0_g1	K13459	-	-3.082	down	At1g12280	probable disease resistance protein At4g27220 [Hevea brasiliensis]	0.33	0.43	0.25	0.21	0.13	0.23	2.63	2.19	1.57	3.33	2.54	3.65	0.26	2.65
TRINITY_DN40118_c1_g1	K14293	-	-1.65915	down	KPNB1	importin subunit beta-1 [Sesamum indicum]	6.02	6	2.59	4	4.04	4.62	8.06	8.51	26.44	12.12	25.26	20.29	4.54	16.78
TRINITY_DN40120_c5_g2	K13448	-	4.38721	up	CML27	probable calcium-binding protein CML27 [Manihot esculenta]	91.28	50.24	34.15	63.24	41.16	76.65	2.3	2.79	3.5	4.1	4.89	4.65	59.45	3.7
TRINITY_DN40122_c2_g1	K09753	EC:1.2.1.44	-1.20836	down	CCR1	cinnamoyl-CoA reductase 1 isoform X1 [Populus trichocarpa]	275.24	189.76	285.17	221.62	149.95	162.54	1041.44	700.49	657.56	434.24	535.39	443.79	214.05	635.48
TRINITY_DN40132_c1_g4	K02891	-	-1.14727	down	RPL22C	hypothetical protein Ahy_A02g005900 isoform D [Arachis hypogaea]	20.38	21.47	13.86	12.56	20.33	17.94	43.25	37.84	52.18	59.43	62.74	48.82	17.76	50.71
TRINITY_DN40138_c2_g14	K16189	-	-1.70317	down	UNE10	transcription factor UNE10 [Populus trichocarpa]	0.24	0.33	3.5	0.33	3.07	2.23	1.9	2.45	5.59	19.99	2.56	13.69	1.62	7.7
TRINITY_DN40141_c2_g7	K13459	-	5.29044	up	At4g27190	putative disease resistance protein [Dorcoceras hygrometricum]	15.99	9.3	4	11.11	10.92	8.62	0	0.28	0.41	0.79	0.41	0	9.99	0.32
TRINITY_DN40148_c1_g1	K12198	-	-1.81973	down	LIR1	PREDICTED: light-regulated protein [Juglans regia]	441.43	1294.21	709.09	1239.59	1136.4	1142.4	6140.5	6113.94	4084.23	4216.63	2406.8	3247.37	993.85	4368.24
TRINITY_DN40160_c0_g1	K15405	-	-1.87917	down	CYP96A15	alkane hydroxylase MAH1 [Populus trichocarpa]	3.74	4.58	3.4	2.84	4.98	5.57	25.01	21.08	20.19	25.71	11.33	15.09	4.18	19.74
TRINITY_DN40166_c0_g1	K14156	EC:2.7.1.32 2.7.1.82	-3.43658	down	At1g74320	unknown [Populus trichocarpa]	0.47	1.19	0.85	2.78	1.94	0.34	9.1	10.19	8.5	9.55	11.44	10.19	1.26	9.83
TRINITY_DN40169_c4_g1	K03260	-	1.12586	up	EIF4G	eukaryotic translation initiation factor 4G [Hevea brasiliensis]	26.52	30.46	12.53	23.92	15.49	15.21	10.59	14.07	12.42	13.54	10.34	14.32	20.69	12.55
TRINITY_DN40170_c4_g7	K08488	-	2.297	up	SYP23	syntaxin-22 isoform X2 [Ricinus communis]	34.93	49.5	52.57	66.8	48.02	53.27	10.54	10.39	15.72	14.51	19.74	14.04	50.85	14.16
TRINITY_DN40172_c2_g1	K00434	EC:1.11.1.11	1.49532	up	APX2	PREDICTED: L-ascorbate peroxidase 1, cytosolic [Erythranthe guttata]	0.55	0.77	0.88	0.94	1.21	1.14	0.27	0.44	0.26	0.34	0.55	0.62	0.92	0.41
TRINITY_DN40179_c0_g3	K00128	EC:1.2.1.3	1.68588	up	ALDH2B7	aldehyde dehydrogenase family 2 member B7, mitochondrial [Sesamum indicum]	1.96	4.91	6.89	8.69	3.16	3.95	1	0.86	0.96	0.9	3.84	2.3	4.93	1.64
TRINITY_DN40182_c0_g2	K03115	-	-1.63812	down	creC	dystrophia myotonica WD repeat-containing protein-like [Cajanus cajan]	5.08	3.48	3.79	3.67	3.53	2.35	16.57	13.1	13.15	14.11	14.62	13.95	3.65	14.25
TRINITY_DN40200_c2_g10	K14491	-	-1.54217	down	GLK1	transcription activator GLK1-like [Manihot esculenta]	16.97	20.35	5.28	8.59	16.91	15.66	84.32	60.48	38.75	37.41	52.03	35.69	13.96	51.45
TRINITY_DN40211_c0_g1	K00162	EC:1.2.4.1	1.61902	up	Os08g0536000	pyruvate dehydrogenase E1 component subunit beta-1, mitochondrial isoform X1 [Rosa chinensis]	84.36	123.31	109.61	125.01	88.79	83.35	35.36	44.47	54.64	43.27	61.08	63.13	102.41	50.32
TRINITY_DN40218_c1_g2	K00432	EC:1.11.1.9	-1.65426	down	GPX8	putative phospholipid hydroperoxide glutathione peroxidase, partial [Mucuna pruriens]	13.17	29.26	8.75	19.37	18.22	15.49	51.19	59.79	65.71	68.97	94.72	91.36	17.38	71.96
TRINITY_DN40234_c1_g3	K00851	EC:2.7.1.12	5.72091	up	idnK	gluconokinase isoform X2 [Populus trichocarpa]	138.29	117.19	208.15	114.66	74.03	112.14	2.85	1.05	3.48	4.92	3.93	4.08	127.41	3.39
TRINITY_DN40237_c2_g3	K10775	EC:4.3.1.24	3.45428	up	-	putative phenylalanine ammonia-lyase, partial [Rhizophora mangle]	6.47	2.87	12.57	6.24	1.63	12.61	1.87	0.31	0	0.88	1.54	0.6	7.07	0.87
TRINITY_DN40237_c2_g5	K10775	EC:4.3.1.24	2.60719	up	-	phenylalanine ammonia-lyase [Sesamum indicum]	0.07	0.11	0.3	0.46	0.21	0.29	0	0.04	0.02	0	0.16	0.09	0.24	0.05
TRINITY_DN40239_c1_g3	K14288	-	2.36099	up	-	exportin-T isoform X2 [Solanum lycopersicum]	15.32	15.65	16.82	13.89	10.29	11.86	3.87	4.25	3.36	3.89	4.4	2.79	13.97	3.76
TRINITY_DN40241_c3_g5	K02638	-	-1.88182	down	PETE	plastocyanin [Jatropha curcas]	151.67	262	199.15	205.84	799.43	516.04	2068.24	1678.62	1673.43	2068.64	980.35	1899.62	355.69	1728.15
TRINITY_DN40253_c0_g5	K02695	-	1.94212	up	PSAH	PREDICTED: photosystem I reaction center subunit VI-2, chloroplastic-like [Solanum tuberosum]	3.13	4.17	6.64	10.27	5.87	6.62	3.27	2.74	0.76	0.11	2.58	2.92	6.12	2.06
TRINITY_DN40254_c1_g1	K07897	-	-1.06623	down	-	Ras-related protein Rab7 [Vitis vinifera]	16.41	23.61	19.03	15.42	16.5	18.39	42.52	35.44	57.29	44.64	62.57	59.05	18.23	50.25
TRINITY_DN40254_c2_g2	K00921	EC:2.7.1.150	-1.15713	down	FAB1D	hypothetical protein JCGZ_11021 [Jatropha curcas]	0.6	0.91	2.01	0.51	0.84	0.6	1.9	1.98	2.31	2.89	1	2.24	0.91	2.05
TRINITY_DN40261_c0_g1	K18443	-	-2.19051	down	GN	ARF guanine-nucleotide exchange factor GNOM [Jatropha curcas]	0.63	1.4	0.16	0.91	0.45	0.75	4.53	5.07	3.62	4.97	2.63	3.58	0.72	4.07
TRINITY_DN40281_c2_g1	K14411	-	-1.15276	down	RNP1	hypothetical protein POPTR_001G361300 [Populus trichocarpa]	6.59	7.63	6.32	4.86	4.95	6.31	19.32	16.09	13.03	22.95	15.06	17.43	6.11	17.31
TRINITY_DN40283_c0_g2	K06236	-	6.34872	up	At1g14600	putative Myb family transcription factor At1g14600 isoform X2 [Ricinus communis]	1.64	2	8.46	3.99	4.39	3.79	0.03	0.06	0.06	0.03	0.03	0.17	4.05	0.06
TRINITY_DN40297_c1_g1	K04716	EC:3.1.3.-	1.50689	up	LPPD	lipid phosphate phosphatase delta-like [Chenopodium quinoa]	5.57	2.5	2.42	1.87	1.03	2.45	0.66	1.38	1.63	1.48	0.95	1.14	2.64	1.21
TRINITY_DN40314_c1_g9	K04506	EC:2.3.2.27	-4.06308	down	At5g37930	E3 ubiquitin-protein ligase SINA-like 10 [Jatropha curcas]	0.22	1.16	0.22	0.24	0.62	0.33	5.83	9.09	15.46	7.69	10.77	12.34	0.47	10.2
TRINITY_DN40321_c0_g2	K14497	EC:3.1.3.16	-3.08526	down	HAB1	probable protein phosphatase 2C 53 [Hevea brasiliensis]	1.84	2.3	1.6	2.04	2.99	1.67	24.45	29.96	17.53	25.4	17.2	18.38	2.07	22.15
TRINITY_DN40328_c0_g6	K12818	EC:3.6.4.13	1.7777	up	At3g26560	probable pre-mRNA-splicing factor ATP-dependent RNA helicase DEAH5 [Ricinus communis]	4.66	4.6	3.1	4.48	3.92	3.98	1.16	1.56	0.93	1.68	1.75	2.3	4.12	1.56
TRINITY_DN40349_c4_g9	K13412	EC:2.7.11.1	2.94209	up	CPK32	PREDICTED: calcium-dependent protein kinase 32-like [Populus euphratica]	17.12	15.73	22.55	14	13.7	11.85	1.58	2.1	3.29	2.52	2.73	4.03	15.83	2.71
TRINITY_DN40350_c0_g1	K22013	EC:4.99.1.10	-1.34943	down	SGRL	protein STAY-GREEN LIKE, chloroplastic-like isoform X2 [Hevea brasiliensis]	0.65	0.1	1.18	0.54	2.17	2.13	1.18	1.61	3.87	9.75	1.19	6.13	1.13	3.96
TRINITY_DN40370_c0_g1	K14156	EC:2.7.1.32 2.7.1.82	2.21264	up	CK1	PREDICTED: probable choline kinase 1 isoform X1 [Fragaria vesca subsp. vesca]	125.41	210.47	277.6	240.93	174.24	123.44	29.69	60.81	85.65	45.44	23.39	87.56	192.02	55.42
TRINITY_DN40388_c1_g6	K14488	-	-3.83836	down	-	auxin-responsive protein SAUR40-like [Hevea brasiliensis]	0	0.19	0.09	0.38	0.08	0	0.28	0.45	1.17	5.82	3.31	3.84	0.12	2.48
TRINITY_DN40400_c5_g3	K14486	-	-1.47154	down	ARF8	auxin response factor 8 isoform X1 [Ricinus communis]	1	0.41	0.71	0.64	1.6	1.07	1.3	5.28	3.29	4.49	2.49	3.01	0.91	3.31
TRINITY_DN40404_c1_g2	K00232	EC:1.3.3.6	1.36253	up	ACX1.2	hypothetical protein B456_008G233600 [Gossypium raimondii]	33.72	25.02	29.74	28.06	15.54	22.96	14.28	14.13	16.04	13.86	19.95	14.46	25.84	15.45
TRINITY_DN40410_c1_g1	K00895	EC:2.7.1.90	3.54513	up	-	uncharacterized protein LOC107415650 [Ziziphus jujuba]	3.14	5.01	6.45	6.19	3.73	4.56	0.78	0.54	0.57	0.51	0.35	0.49	4.85	0.54
TRINITY_DN40424_c1_g3	K02641	EC:1.18.1.2	1.2454	up	-	Ferredoxin--NADP reductase [Zea mays]	37.62	54.28	17.16	37.37	38.65	37.09	15.42	15.92	24.05	21.88	23.11	27.1	37.03	21.25
TRINITY_DN40428_c2_g2	K01892	EC:6.1.1.21	-1.56102	down	At3g46100	histidine--tRNA ligase, chloroplastic/mitochondrial-like isoform X1 [Hevea brasiliensis]	6.06	5.5	6.64	5.84	9.55	4.84	27.18	23.45	30.15	23.89	25.2	21.31	6.41	25.2
TRINITY_DN40432_c1_g2	K10601	EC:2.3.2.27	2.06456	up	HRD1A	ERAD-associated E3 ubiquitin-protein ligase HRD1B-like [Sesamum indicum]	0.36	0.26	0.54	0.63	0.58	0.54	0.11	0.15	0.05	0.09	0.28	0.27	0.49	0.16
TRINITY_DN40471_c1_g3	K12880	-	1.2184	up	CG7611	WD repeat-containing protein 26 [Herrania umbratica]	14.87	11.23	4.52	8.86	11.54	13.65	5.67	7.1	6.09	6.24	5.95	5.25	10.78	6.05
TRINITY_DN40476_c1_g2	K16904	EC:3.6.1.12	2.23525	up	-	dCTP pyrophosphatase 1 [Jatropha curcas]	13.09	8.2	8.49	5.84	6.03	13.17	2.08	1.8	1.19	2.27	2.52	3.7	9.14	2.26
TRINITY_DN40495_c0_g1	K01184	EC:3.2.1.15	-1.49955	down	ADPG2	Glyco_hydro_28 domain-containing protein [Cephalotus follicularis]	1.4	1.45	0.35	1.48	1.12	0.45	4.79	4.37	3.34	5.23	1.13	3.37	1.04	3.71
TRINITY_DN40501_c0_g3	K03011	-	-1.81015	down	NRPB3	DNA-directed RNA polymerases II, IV and V subunit 3-like [Hevea brasiliensis]	0.23	1.09	0.92	0.58	0.99	0.84	5.42	2.65	2.63	3.56	1.39	1.25	0.78	2.82
TRINITY_DN40509_c2_g9	K00873	EC:2.7.1.40	1.84704	up	OsI_35105	pyruvate kinase 1, cytosolic-like [Manihot esculenta]	35.82	32.43	36.49	27	28.45	30.86	5	7	12.75	15.2	18.51	13.41	31.84	11.98
TRINITY_DN40510_c2_g3	K13463	-	-1.78357	down	COI1	RNI-like superfamily protein [Theobroma cacao]	2.37	15.8	1.68	11.17	8.85	7.97	41.76	47.59	19.27	44.77	31.07	23.09	7.97	34.59
TRINITY_DN40521_c1_g5	K02901	-	1.46923	up	RPL27C	60S ribosomal protein L27-3 [Jatropha curcas]	10.26	14.51	13	15.22	16.64	15.74	6	5.76	7.23	7.75	6.18	7.47	14.23	6.73
TRINITY_DN40522_c0_g1	K13789	EC:2.5.1.1 2.5.1.10 2.5.1.29	4.23186	up	At2g18620	heterodimeric geranylgeranyl pyrophosphate synthase small subunit, chloroplastic-like [Quercus suber]	116.82	71.96	281.63	165.76	122.02	163.3	17.83	11.81	6.31	5.83	13.3	9.53	153.58	10.77
TRINITY_DN40526_c2_g9	K00083	EC:1.1.1.195	2.2056	up	10HGO	8-hydroxygeraniol dehydrogenase [Sesamum indicum]	2.49	2.22	1.24	1.59	1.18	0.81	0.41	0.12	0.11	0.15	0.78	0.81	1.59	0.4
TRINITY_DN40554_c5_g2	K01784	EC:5.1.3.2	-1.18542	down	-	PREDICTED: bifunctional UDP-glucose 4-epimerase and UDP-xylose 4-epimerase 1 [Lupinus angustifolius]	2.13	3.97	3.26	5.63	5.69	2.76	6.22	9.67	13.29	14.5	16.95	10.45	3.91	11.85
TRINITY_DN40556_c0_g5	K13065	EC:2.3.1.133	3.00685	up	ACT	vinorine synthase-like [Hevea brasiliensis]	1.3	0.28	4.69	0.74	0.4	0.97	0	0.08	0.15	0.66	0.15	0.41	1.4	0.24
TRINITY_DN40567_c0_g1	K03260	-	2.09488	up	EIF(ISO)4G1	eukaryotic translation initiation factor-like [Manihot esculenta]	2.55	3.06	2.04	2.53	1.02	2.83	0.59	1.03	0.43	0.97	0.46	0.92	2.34	0.73
TRINITY_DN40571_c0_g4	K13449	-	8.46682	up	-	pathogenesis-related protein PR-1-like [Hevea brasiliensis]	5.58	1.05	9.73	4.39	3.37	3.22	0	0	0	0	0	0	4.56	0
TRINITY_DN40572_c0_g1	K03046	EC:2.7.7.6	1.46332	up	-	hypothetical protein KK1_029344, partial [Cajanus cajan]	3491.15	4880.81	4384.79	6002.01	5958.63	7891.56	2615.83	4809.83	1661.35	1941.77	2163.07	2284.75	5434.83	2579.43
TRINITY_DN40572_c0_g4	K02948	-	1.35829	up	-	uncharacterized protein LOC107643668 [Arachis ipaensis]	2766.72	4004.76	3226.93	4352.94	4604.88	6475.26	2258.55	4081.94	1373.25	1728.08	1779.22	1916.64	4238.58	2189.61
TRINITY_DN40576_c0_g2	K01858	EC:5.5.1.4	1.94752	up	-	myo-inositol 1-phosphate synthase [Avicennia marina]	0.32	0.48	0.83	0.7	0.51	0.43	0.08	0.12	0.15	0.03	0.27	0.42	0.55	0.18
TRINITY_DN40577_c1_g1	K00549	EC:2.1.1.14	-1.72055	down	FTIP1	hypothetical protein POPTR_019G080000 [Populus trichocarpa]	6.47	4.08	1.52	1.67	3.96	4.46	19.32	15.42	10.78	22.8	10.54	15.23	3.69	15.68
TRINITY_DN40586_c2_g1	K08726	EC:3.3.2.10 3.1.3.76	-1.51327	down	ephA	uncharacterized protein LOC105642552 [Jatropha curcas]	10.53	9.1	5.28	4.55	7.16	7.71	21.95	21.84	25.42	24.01	23.47	30.91	7.39	24.6
TRINITY_DN40594_c0_g2	K10802	-	1.66912	up	-	HMG1/2-like protein [Sesamum indicum]	1.25	0.74	1.74	1.68	1.01	0.97	0.77	0.43	0.24	0.19	1.01	0.44	1.23	0.51
TRINITY_DN40596_c0_g1	K01188	EC:3.2.1.21	-2.21699	down	At3g49720	Uncharacterized protein CEY00_Acc06863 [Actinidia chinensis var. chinensis]	5.09	6.91	2.34	4.51	7.18	2	11.96	15.38	14.92	23.19	14.69	19.29	4.67	16.57
TRINITY_DN40601_c0_g1	K05359	EC:4.2.1.91 4.2.1.51	6.27592	up	ADT1	BnaC05g08770D [Brassica napus]	2.14	0.66	12.15	3.28	1.73	2.02	0	0	0	0	0.24	0	3.66	0.04
TRINITY_DN40601_c1_g1	K01507	EC:3.6.1.1	-1.70779	down	-	vacuolar H+-pyrophosphatase [Prunus persica]	76.27	63.45	59.21	52.6	115.6	74.37	330.17	351.04	269.71	303.65	201.22	248.72	73.58	284.09
TRINITY_DN40623_c2_g1	K13463	-	-1.79815	down	COI1	coronatine-insensitive protein 1-like protein [Corchorus olitorius]	10.73	12.9	2.92	7.59	6.11	6.52	42.6	40.96	22.02	39.79	30.9	28.75	7.79	34.17
TRINITY_DN40623_c3_g1	K13463	-	-1.91136	down	COI1	coronatine-insensitive protein 1 [Manihot esculenta]	1.88	5.8	3.86	1.07	2.72	1.94	8.86	6.74	20.73	12.41	20.8	15.24	2.88	14.13
TRINITY_DN40630_c1_g3	K19562	EC:6.3.3.3 2.6.1.62	-1.99694	down	-	uncharacterized protein LOC8259867 isoform X1 [Ricinus communis]	3.02	4.37	2.36	3.1	3.4	3.24	20.77	19.46	12.95	16.66	11.19	10.68	3.25	15.29
TRINITY_DN40631_c0_g1	K00002	EC:1.1.1.2	1.18188	up	AKR4C10	aldo-keto reductase family 4 member C9 [Jatropha curcas]	25.91	36.89	24.82	69.93	13.35	26.07	9.5	7.35	17	12.66	56.16	12.62	32.83	19.21
TRINITY_DN40640_c1_g7	K14496	-	-1.17191	down	PYL4	PREDICTED: abscisic acid receptor PYL4-like [Populus euphratica]	0.44	1.32	0.87	1.43	1.31	1.29	4.11	1.4	2.48	6.79	0.66	4.13	1.11	3.26
TRINITY_DN40641_c0_g1	K13352	-	5.51034	up	PEX11A	PREDICTED: peroxisomal membrane protein 11A-like [Populus euphratica]	81.35	86.69	82.54	114.79	77.62	93.79	1.11	2.27	2.67	2.95	3.44	2.93	89.46	2.56
TRINITY_DN40653_c2_g10	K03006	EC:2.7.7.6	-1.85288	down	GIP	retrovirus-related Pol polyprotein from transposon TNT 1-94 [Dorcoceras hygrometricum]	0.46	1.66	0.06	1.83	0.27	0.23	1.24	5.48	0.45	0.88	1.08	1.66	0.75	1.8
TRINITY_DN40655_c1_g4	K00799	EC:2.5.1.18	2.5175	up	GSTU1	glutathione transferase GST 23 [Jatropha curcas]	206.59	405.64	233.58	313.31	328.36	322.98	29.65	40.81	91.38	63.86	93.5	107.57	301.74	71.13
TRINITY_DN40661_c0_g1	K03116	-	-2.21317	down	TATB	hypothetical protein JCGZ_26078 [Jatropha curcas]	7.27	9.3	5.4	6.3	12.71	8.42	45.33	43.67	51.34	56.09	45.29	52.16	8.23	48.98
TRINITY_DN40665_c0_g8	K15920	EC:3.2.1.37	7.68145	up	-	probable beta-D-xylosidase 5 isoform X2 [Ricinus communis]	19.51	0.17	56.82	3.54	6.18	51.19	0.33	0	0.16	0	0.32	0	22.9	0.14
TRINITY_DN40666_c0_g1	K01597	EC:4.1.1.33	-1.52251	down	MVD2	PREDICTED: diphosphomevalonate decarboxylase-like [Populus euphratica]	1.21	0.56	0.54	0.73	0.6	0.48	2.01	2.13	1.73	2.87	2.18	1.66	0.69	2.1
TRINITY_DN40675_c2_g3	K13800	EC:2.7.4.14	-1.342	down	-	hypothetical protein B456_008G217000 [Gossypium raimondii]	4.27	5.06	3.9	4.13	4.04	4.46	16.35	13.28	16.35	16.13	12.67	13.64	4.31	14.74
TRINITY_DN40677_c0_g2	K05666	-	1.32645	up	ABCC5	ABC transporter family protein [Hevea brasiliensis]	2.12	1.42	2.59	1.66	4.36	3.41	0.41	0.75	2.05	1.15	1.81	2.05	2.59	1.37
TRINITY_DN40681_c0_g5	K13789	EC:2.5.1.1 2.5.1.10 2.5.1.29	4.40331	up	GGPS	geranylgeranyl pyrophosphate synthase, chloroplastic [Populus trichocarpa]	279.3	118.61	356.71	227.11	189	157.91	7.78	6.44	18.28	6.44	21.99	22.66	221.44	13.93
TRINITY_DN40682_c1_g1	K07374	-	3.17558	up	TUBA1	alpha-tubulin 4, partial [Gossypium hirsutum]	19.79	23.35	23.61	20.34	19.25	24.69	1.04	3.05	2.97	1.86	4.98	3.76	21.84	2.94
TRINITY_DN40689_c0_g1	K03124	-	-1.80651	down	TFIIB2	transcription initiation factor IIB-2 isoform X1 [Jatropha curcas]	1.59	1.57	1.34	0.9	1.25	0.94	6.5	7.75	5.22	4.54	5.52	5.19	1.26	5.79
TRINITY_DN40693_c0_g1	K00830	EC:2.6.1.44 2.6.1.45 2.6.1.51	1.92695	up	AGT1	serine--glyoxylate aminotransferase [Sesamum indicum]	1.08	1.04	2.48	2.11	1.36	1.5	0.63	0.47	0.21	0.09	0.66	1.19	1.59	0.54
TRINITY_DN40700_c1_g5	K00026	EC:1.1.1.37	1.24417	up	-	NAD-dependent malate dehydrogenase [Handroanthus impetiginosus]	0.93	0.62	0.68	1	0.82	1.07	0.29	0.62	0.12	0.3	0.72	0.6	0.85	0.44
TRINITY_DN40702_c1_g2	K02973	-	2.09626	up	RPS23	hypothetical protein AQUCO_10500021v1, partial [Aquilegia coerulea]	5.81	4.57	8.22	7.23	2.43	4.5	1.21	0	3.43	0.37	0.48	1.12	5.46	1.1
TRINITY_DN40702_c1_g5	K02973	-	1.11982	up	RPS23	putative serine/threonine-protein kinase MARK-A isoform X2 [Prunus yedoensis var. nudiflora]	4.06	3.83	3.61	3.21	1.91	1.61	1.6	1.48	1.54	1.24	2.86	2.44	3.04	1.86
TRINITY_DN40706_c0_g12	K14516	-	8.09008	up	ERF095	PREDICTED: ethylene-responsive transcription factor ERF095 [Vitis vinifera]	9.43	0.91	9.64	1.65	2.62	2.8	0	0	0	0	0.07	0	4.51	0.01
TRINITY_DN40714_c4_g6	K01784	EC:5.1.3.2	3.91578	up	-	UDP-glucose 4-epimerase GEPI48 [Citrus clementina]	9	16	15.59	10.39	8.44	14.41	0.9	0.62	0.41	0.44	0.52	0.3	12.3	0.53
TRINITY_DN40715_c0_g1	K16221	-	-2.80201	down	TCP15	transcription factor TCP11-like [Hevea brasiliensis]	0.93	1.44	0.87	1.45	1.12	1.07	2.04	1.62	12.99	7.81	21.47	16.59	1.15	10.42
TRINITY_DN40717_c0_g11	K13265	EC:1.1.1.348	2.06024	up	-	vestitone reductase-like isoform X1 [Hevea brasiliensis]	39.23	66.3	72.96	88.38	94.25	71.2	14.92	15.97	23.41	23.59	36.49	27.1	72.05	23.58
TRINITY_DN40717_c0_g4	K13265	EC:1.1.1.348	-2.12313	down	-	vestitone reductase-like [Hevea brasiliensis]	2.11	3.55	2.76	1.82	1.39	2.26	15.85	16.57	9.6	9.88	13.86	11.1	2.31	12.81
TRINITY_DN40718_c3_g5	K00797	EC:2.5.1.16	-1.3701	down	-	spermine synthase isoform X2 [Ricinus communis]	12.61	20.68	6.8	13.91	21.91	16.23	62.09	75.08	39.96	56.08	21.6	49.79	15.36	50.77
TRINITY_DN40722_c3_g2	K12617	-	1.43713	up	-	PREDICTED: protein PAT1 homolog 1-like [Populus euphratica]	43.75	45.65	26.83	41.93	37.69	39.91	36.8	40.27	18.22	25.47	14.78	27.49	39.29	27.17
TRINITY_DN40722_c3_g4	K18693	EC:3.1.3.81 3.1.3.4	-2.83431	down	LPP3	putative lipid phosphate phosphatase 3, chloroplastic isoform X2 [Hevea brasiliensis]	1.05	1.27	2.98	0.54	0.79	1.51	13.18	15.41	12.94	15.72	7.33	15.47	1.36	13.34
TRINITY_DN40725_c0_g2	K00549	EC:2.1.1.14	3.56513	up	MS1	5-methyltetrahydropteroyltriglutamate--homocysteine methyltransferase [Prunus persica]	55.67	53.79	78.21	100.64	41.06	58.81	1.61	3.71	4.8	13.09	6.93	14.88	64.7	7.5
TRINITY_DN40725_c0_g6	K00549	EC:2.1.1.14	1.96704	up	METE	5-methyltetrahydropteroyltriglutamate--homocysteine methyltransferase-like [Durio zibethinus]	6.73	13.07	12.58	8.4	12.25	11.17	0.9	1.48	4.78	5.91	3.08	5.69	10.7	3.64
TRINITY_DN40740_c0_g1	K08917	-	8.62243	up	CAP10A	chlorophyll a-b binding protein CP24 10A, chloroplastic-like [Nicotiana tabacum]	0	0	10.48	0	6.74	0	0	0	0	0	0	0	2.87	0
TRINITY_DN40742_c4_g1	K14411	-	1.5967	up	RNP1	heterogeneous nuclear ribonucleoprotein 1 [Jatropha curcas]	20.76	19.98	9.91	21.5	11.08	15.65	4.02	5.8	5.07	8.16	10.14	4.55	16.48	6.29
TRINITY_DN40761_c3_g1	K12446	EC:2.7.1.46	-2.52194	down	ARA1	PREDICTED: L-arabinokinase [Vitis vinifera]	1.2	0.44	0.4	0.23	0.47	0.46	3.57	3.07	3.71	2.29	3.42	3.1	0.53	3.19
TRINITY_DN40774_c0_g2	K01679	EC:4.2.1.2	3.58338	up	FUM1	PREDICTED: fumarate hydratase 1, mitochondrial [Populus euphratica]	0.95	1.76	1.01	0.9	1.84	1.13	0	0.19	0	0.09	0.38	0.09	1.26	0.12
TRINITY_DN40781_c0_g1	K01230	EC:3.2.1.113	1.10429	up	MNS1	mannosyl-oligosaccharide 1,2-alpha-mannosidase MNS1 [Jatropha curcas]	41.86	39.84	11.66	21.96	16.07	23.75	9.22	11.89	22.04	11.9	12.66	13.93	25.86	13.61
TRINITY_DN40787_c0_g1	K01054	EC:3.1.1.23	-3.18378	down	Mgll	caffeoylshikimate esterase-like [Manihot esculenta]	0.1	0.05	0.05	0	0.33	0.2	1.08	1.86	1.24	1.95	1.28	1.73	0.12	1.52
TRINITY_DN40787_c1_g1	K16222	-	-2.50908	down	CDF3	PREDICTED: cyclic dof factor 2-like [Populus euphratica]	1.21	6.68	0.84	2.7	4.56	3.26	42.53	53.26	5.96	23.39	5.44	8.43	3.21	23.17
TRINITY_DN40799_c1_g2	K00995	EC:2.7.8.5	-1.41015	down	PGPS2	CDP-diacylglycerol--glycerol-3-phosphate 3-phosphatidyltransferase 2 [Manihot esculenta]	2.58	3.81	3.57	4.49	3.59	2.1	11	13.04	9.18	13.27	12.14	11.21	3.36	11.64
TRINITY_DN40800_c2_g1	K02639	-	-2.77746	down	FDX3	ferredoxin, root R-B2 [Populus trichocarpa]	0.16	0.08	0.23	0.59	0.29	0.24	5.86	3.45	1.1	1.44	0.76	0.4	0.27	2.17
TRINITY_DN40800_c2_g2	K02639	-	3.64909	up	FDX3	ferredoxin, root R-B2 [Ricinus communis]	668.31	705.49	708.6	737.08	467.81	617.23	109.91	65	51.47	67.64	74.76	45.51	650.75	69.05
TRINITY_DN40807_c0_g1	K00036	EC:1.1.1.49 1.1.1.363	1.55939	up	-	glucose-6-phosphate 1-dehydrogenase, chloroplastic [Populus trichocarpa]	24.61	21.88	49.2	26.62	21.81	22.52	15.9	17.43	11.09	11.28	8.9	10.29	27.77	12.48
TRINITY_DN40808_c0_g4	K16055	EC:2.4.1.15 3.1.3.12	-1.8308	down	-	uncharacterized protein LOC110633530 isoform X1 [Hevea brasiliensis]	9.05	7.74	5.62	6.99	8.12	6.56	23.61	24.31	24.87	24.74	20.15	24.21	7.35	23.65
TRINITY_DN40810_c0_g1	K08341	-	-1.75561	down	ATG8C	autophagy-related protein 8C [Ricinus communis]	0.74	0.32	1.48	1.12	2.17	0.71	3.83	5.44	4.33	6.69	4.98	5.25	1.09	5.09
TRINITY_DN40815_c1_g2	K19366	-	-1.04069	down	-	uncharacterized protein LOC111005574 [Momordica charantia]	26.07	27.09	12.89	21.83	31.59	24.96	61.32	60.95	61.36	76.84	70.82	67.36	24.07	66.44
TRINITY_DN40815_c3_g1	K13800	EC:2.7.4.14	-3.68554	down	URA6	putative UMP/CMP kinase 3 [Ananas comosus]	0.74	2.81	0.9	0.24	1.96	1.51	12.7	12.13	9.48	10.97	8.05	12.75	1.36	11.01
TRINITY_DN40816_c0_g1	K00134	EC:1.2.1.12	1.5014	up	GAPC	glyceraldehyde 3-phosphate dehydrogenase [Salvia miltiorrhiza]	1.35	2.33	3.25	3.15	3.89	3.29	1.93	0.51	0.96	1.38	1.48	2.43	2.88	1.45
TRINITY_DN40832_c0_g3	K00262	EC:1.4.1.4	-1.87245	down	gdhA	NADP-specific glutamate dehydrogenase isoform X3 [Sesamum indicum]	1.6	2.94	1.36	2.15	1.48	1.37	8.05	12.09	12.69	8.59	8.63	11.66	1.82	10.29
TRINITY_DN40835_c0_g1	K02911	-	-4.93898	down	-	uncharacterized protein LOC112033975 [Quercus suber]	2.93	2.02	3.21	1.92	3.12	3.35	297.63	182.65	64.76	101.65	57.52	53.98	2.76	126.36
TRINITY_DN40845_c0_g1	K13648	EC:2.4.1.43	-1.38525	down	GAUT8	probable galacturonosyltransferase 9 [Hevea brasiliensis]	2.25	7	2.52	4.14	6.76	1.68	7.75	11.68	9.96	20.13	16.3	19.68	4.06	14.25
TRINITY_DN40856_c0_g1	K01723	EC:4.2.1.92	9.65913	up	AOS3	allene oxide synthase 3 [Populus trichocarpa]	6.69	4.28	106.39	13.71	5.6	9.86	0.09	0.03	0.03	0.05	0.03	0	24.42	0.04
TRINITY_DN40874_c0_g1	K07375	-	2.31088	up	TUBB3	tubulin beta-7 chain [Brassica napus]	3.24	2.96	6.27	1.79	2.14	2.69	0.11	0.78	0.37	1.59	0.77	0.61	3.18	0.7
TRINITY_DN40874_c2_g1	K07375	-	-1.69098	down	-	Beta-6 tubulin [Theobroma cacao]	2.16	0.89	2.01	0	3.04	2.81	9.59	7.3	5.63	10.25	4.76	12.15	1.82	8.28
TRINITY_DN40887_c1_g3	K01739	EC:2.5.1.48	1.42762	up	CGS1	LOW QUALITY PROTEIN: cystathionine gamma-synthase 1, chloroplastic-like [Sesamum indicum]	0.29	0.7	1.57	1.85	0.82	0.87	0.2	0.49	0.39	0.37	0.39	1.22	1.02	0.51
TRINITY_DN40889_c1_g3	K14376	EC:2.7.7.19	-1.78358	down	-	nuclear poly(A) polymerase 4-like [Hevea brasiliensis]	5.84	7.84	4.59	6.92	4.05	4.63	28.48	30.39	26.89	24.7	24.86	26.12	5.64	26.91
TRINITY_DN40890_c2_g1	K03100	EC:3.4.21.89	-1.1548	down	-	uncharacterized protein LOC110652188 [Hevea brasiliensis]	14.31	15.03	9.46	7.35	10.06	12.7	25.09	27.38	40.62	28.41	38.31	41.64	11.48	33.57
TRINITY_DN40896_c0_g1	K12129	-	1.7944	up	PRR73	two-component response regulator-like APRR3 [Sesamum indicum]	0.36	0.25	0.36	0.28	0.41	0.34	0.06	0.12	0.02	0.03	0.3	0.32	0.33	0.14
TRINITY_DN40916_c0_g2	K08739	-	-1.28043	down	-	DNA mismatch repair protein MLH3 [Hevea brasiliensis]	0.69	0.18	3.11	1.61	1.09	1.16	4.75	5.19	3.63	4.29	3.79	5.03	1.31	4.45
TRINITY_DN40923_c0_g1	K05605	EC:3.1.2.4	-1.46517	down	CHY1	3-hydroxyisobutyryl-CoA hydrolase 1-like isoform X2 [Herrania umbratica]	3.84	26.65	4.95	15.3	4.65	3.98	47.39	28.56	21.17	28.96	35.75	36.57	9.89	33.07
TRINITY_DN40924_c0_g1	K00705	EC:2.4.1.25	1.66499	up	DPE2	4-alpha-glucanotransferase DPE2 [Sesamum indicum]	0.38	0.73	0.93	0.85	1	0.68	0.27	0.19	0.17	0.13	0.44	1.23	0.76	0.4
TRINITY_DN40929_c1_g5	K14497	EC:3.1.3.16	-2.64852	down	HAB1	PREDICTED: probable protein phosphatase 2C 53 [Populus euphratica]	3.21	5.06	3.34	3.06	4.45	2.98	34.71	45.13	24.87	27.83	24	23.92	3.68	30.08
TRINITY_DN40930_c0_g1	K01915	EC:6.3.1.2	1.96293	up	GS1-2	glutamine synthetase [Avicennia marina]	0.43	0.6	0.87	1.29	0.96	0.86	0.21	0.27	0.1	0.17	0.64	0.53	0.84	0.32
TRINITY_DN40933_c0_g1	K08917	-	-3.04596	down	CAP10A	chlorophyll a-b binding protein CP24 10A, chloroplastic [Manihot esculenta]	46.73	53.96	64.76	68.59	274.19	118.09	1519.04	1104.93	972.4	1202.3	771.51	1144.61	104.39	1119.13
TRINITY_DN40944_c0_g1	K16055	EC:2.4.1.15 3.1.3.12	-1.90147	down	TPS1	alpha,alpha-trehalose-phosphate synthase [UDP-forming] 1 isoform X1 [Populus trichocarpa]	1.01	4.37	3.44	5.35	2.98	2.47	21.01	16.55	13.63	13.15	16.2	11.27	3.27	15.3
TRINITY_DN40947_c0_g1	K11092	-	1.53967	up	At1g09760	U2 small nuclear ribonucleoprotein A [Theobroma cacao]	50.25	56.96	21.46	46.86	32.44	41.36	17.2	19.02	16.89	19.94	17.32	18.46	41.56	18.14
TRINITY_DN40958_c2_g1	K04710	EC:2.3.1.24	1.58689	up	-	ASC1-like protein [Solanum lycopersicum]	35.27	41.32	55.05	38.93	37.22	33.75	12.75	16.81	22.66	22.25	24.77	25.01	40.26	20.71
TRINITY_DN40959_c0_g5	K01759	EC:4.4.1.5	1.92297	up	-	uncharacterized protein LOC8265724 [Ricinus communis]	3.6	5.17	5.14	4.89	2.88	3.19	0.36	0.47	1.73	0.89	3.92	1.24	4.15	1.43
TRINITY_DN40974_c2_g3	K07897	-	2.68053	up	-	Ras-related protein Rab7 [Cajanus cajan]	3.33	2.29	1.88	1.37	2.77	1.65	1.45	0.43	3.34	5.22	1.18	2.23	2.22	2.31
TRINITY_DN40978_c2_g2	K14484	-	1.26436	up	AUX22D	auxin-induced protein 22D [Populus trichocarpa]	16.82	19.55	35.66	43.99	36.21	39.74	21.48	19.77	28.65	19.9	6.1	9.12	32	17.5
TRINITY_DN40980_c0_g7	K00815	EC:2.6.1.5	-1.24821	down	-	uncharacterized protein LOC8262414 [Ricinus communis]	4.17	8.04	5.86	3.32	6.87	6.78	20.78	16.94	16.72	21.44	14.89	18.78	5.84	18.26
TRINITY_DN40995_c0_g1	K00281	EC:1.4.4.2	2.02581	up	GDCSP	glycine dehydrogenase (decarboxylating), mitochondrial [Sesamum indicum]	0.98	0.89	0.89	1.07	1.01	1.07	0.26	0.45	0.14	0.06	0.66	0.4	0.98	0.33
TRINITY_DN41010_c0_g3	K03094	-	-2.37067	down	ASK21	PREDICTED: SKP1-like protein 21 isoform X1 [Populus euphratica]	0.62	1.1	0.79	0.97	0.88	1.02	8.64	8.32	5.1	5.37	2.84	6.24	0.9	6.09
TRINITY_DN41013_c0_g1	K02885	-	-1.77078	down	-	protein ROOT PRIMORDIUM DEFECTIVE 1 [Jatropha curcas]	0.91	0.85	0.21	0.52	0.56	1.03	2.17	1.88	3.32	2.32	4.79	3.31	0.68	2.96
TRINITY_DN41019_c0_g1	K13993	-	-2.61765	down	HSP21.7	21.7 kDa class VI heat shock protein [Manihot esculenta]	0.1	0.78	0.14	0.58	0.2	0.11	3.32	3.01	2.12	1.28	2.68	1.46	0.32	2.31
TRINITY_DN41019_c0_g4	K08901	-	-3.19043	down	PNSL3	photosynthetic NDH subunit of lumenal location 3, chloroplastic [Prunus avium]	9.79	19.35	9.77	21.69	23.84	18.2	376.63	243.13	154.67	183.01	101.83	128.48	17.11	197.96
TRINITY_DN41019_c0_g6	K13993	-	-2.8571	down	-	21.7 kDa class VI heat shock protein-like isoform X2 [Hevea brasiliensis]	0	1.03	0.83	0.18	1.53	0	11.28	10.03	0.69	6.08	7.18	2.43	0.6	6.28
TRINITY_DN41020_c0_g1	K01184	EC:3.2.1.15	4.90836	up	At5g02620	ankyrin repeat-containing protein At5g02620 [Populus trichocarpa]	68.59	31.85	116.86	51.39	32.85	43.25	1.89	2.6	2.7	2.85	2.34	4.44	57.47	2.8
TRINITY_DN41021_c0_g1	K00430	EC:1.11.1.7	5.59223	up	PER55	putative peroxidase [Rosa chinensis]	8.26	5.24	26.39	7.86	12.94	12.8	0	0	0.84	0.2	0.67	0.49	12.25	0.37
TRINITY_DN41032_c0_g6	K13065	EC:2.3.1.133	6.46622	up	ACT	PREDICTED: vinorine synthase [Theobroma cacao]	122.52	40.41	354.6	69.13	64.74	48.72	2.46	1.66	1.89	1.68	1.53	1.44	116.69	1.78
TRINITY_DN41037_c1_g2	K03363	-	5.02962	up	CDC20-2	PREDICTED: cell division cycle 20.2, cofactor of APC complex-like [Erythranthe guttata]	14.03	19.22	38.61	24.1	28.61	19.89	1.15	1.13	0	1.23	0.64	1.72	24.08	0.98
TRINITY_DN41047_c2_g2	K14516	-	4.52901	up	ERF1B	ethylene-responsive transcription factor 1B-like [Hevea brasiliensis]	60.4	5.94	54.93	40.17	39.99	86.6	6.19	4.8	1.66	2.47	0.55	1.08	48	2.79
TRINITY_DN41052_c0_g1	K12623	-	-2.21123	down	LSM4	sm-like protein LSM4 isoform X2 [Manihot esculenta]	5.84	7.56	3.72	5.28	7.13	5.67	35.65	36.03	31.75	37.91	37.86	32.22	5.87	35.24
TRINITY_DN41059_c0_g1	K18443	-	-1.38364	down	GN	LOW QUALITY PROTEIN: ARF guanine-nucleotide exchange factor GNOM [Sesamum indicum]	2.79	4.32	1.86	2.95	3.26	2.48	8.35	10.35	9.58	10.19	9.43	10.07	2.94	9.66
TRINITY_DN41069_c4_g1	K07375	-	2.60386	up	TUBB1	hypothetical protein BRARA_K01811 [Brassica rapa]	1.45	1.93	7.13	2.68	2.85	2.55	0.39	0.53	1.54	0.2	0.68	0.81	3.1	0.69
TRINITY_DN41071_c1_g3	K01595	EC:4.1.1.31	-2.47294	down	SCAR2	hypothetical protein CCACVL1_10546 [Corchorus capsularis]	0.43	0.71	0.53	0.43	0.37	0.93	3.92	4.03	3.27	2.97	2.35	3.79	0.57	3.39
TRINITY_DN41071_c1_g6	K01595	EC:4.1.1.31	1.45321	up	SCAR2	hypothetical protein CCACVL1_10546 [Corchorus capsularis]	5.88	9.43	4.15	5.56	3.83	3.95	2.71	2.1	2.65	1.87	2.37	3.66	5.47	2.56
TRINITY_DN41073_c1_g3	K07374	-	2.82315	up	TUBA2	Tubulin alpha chain, partial [Mucuna pruriens]	5.85	2.02	6.74	1.98	21.15	11.09	0.47	1.55	1.41	3.34	0.39	1.9	8.14	1.51
TRINITY_DN41076_c0_g2	K10591	EC:2.3.2.26	-1.47198	down	UPL5	E3 ubiquitin-protein ligase UPL5 isoform X1 [Jatropha curcas]	1.44	2.19	0.71	1.04	0.88	1.13	3.51	4.34	4.61	4.89	3.95	4.55	1.23	4.31
TRINITY_DN41077_c1_g3	K13993	-	1.28812	up	HSP21	small heat shock protein, chloroplastic-like [Durio zibethinus]	4.87	8.63	3.94	4.99	5.12	5.7	3.61	3.07	2.93	2.6	2.3	2.98	5.54	2.91
TRINITY_DN41078_c1_g1	K07407	EC:3.2.1.22	-1.02043	down	Os10g0493600	Melibiase domain-containing protein [Cephalotus follicularis]	2.2	7.66	2.82	2.4	5.09	4.13	13.65	10.37	12.25	5.36	8.33	8.4	4.05	9.73
TRINITY_DN41078_c2_g3	K14289	-	-1.20847	down	HST1	protein HASTY 1 [Ricinus communis]	2.76	3.01	1.53	2.31	1.95	2.31	7.74	7.89	7.19	6.2	5.47	6.71	2.31	6.87
TRINITY_DN41085_c1_g1	K00975	EC:2.7.7.27	2.27016	up	ADG2	glucose-1-phosphate adenylyltransferase large subunit 3, chloroplastic/amyloplastic [Sesamum indicum]	0.31	0.48	0.74	0.67	0.6	0.69	0.03	0.08	0.15	0.08	0.23	0.27	0.58	0.14
TRINITY_DN41087_c1_g1	K07466	-	-3.60181	down	-	uncharacterized protein At4g28440 [Sesamum indicum]	6.38	2.16	6.17	1.69	6.11	4.37	1.39	2.1	93.8	80.25	148.35	126.67	4.48	75.43
TRINITY_DN41095_c0_g1	K04077	-	2.13081	up	-	Mitochondrial chaperonin, Cpn60/Hsp60p [Handroanthus impetiginosus]	0.38	0.39	0.91	0.87	0.72	0.62	0.21	0.17	0	0	0.21	0.5	0.65	0.18
TRINITY_DN41096_c0_g3	K03267	-	-1.10936	down	-	T10O22.4 [Arabidopsis thaliana]	12.64	11.63	7.21	11.2	2.53	8.66	22.15	24.22	18.47	18.23	17.38	14.54	8.98	19.17
TRINITY_DN41099_c4_g1	K14486	-	3.51429	up	ARF19	hypothetical protein MIMGU_mgv1a0007532mg, partial [Erythranthe guttata]	11.93	10.37	3.13	6.58	6.62	7.71	0	0.45	1.2	0.96	2.51	0.24	7.72	0.89
TRINITY_DN41105_c2_g1	K14488	-	5.20077	up	SAUR36	auxin-responsive protein SAUR36 [Ricinus communis]	15.54	1.34	26.1	1.32	3.8	4.42	0	0	0	0	0.87	0.84	8.75	0.28
TRINITY_DN41105_c2_g10	K14488	-	2.5521	up	SAUR36	auxin-responsive protein SAUR36 [Jatropha curcas]	93.34	47.31	433.45	123.35	152.31	135.52	8.71	11.58	27.53	74.7	66.83	44.23	164.21	38.93
TRINITY_DN41106_c0_g2	K00145	EC:1.2.1.38	-1.43644	down	At2g19940	probable N-acetyl-gamma-glutamyl-phosphate reductase, chloroplastic isoform X2 [Hevea brasiliensis]	7.89	6.39	4.5	5.93	7.16	3.08	19.79	18.89	19.95	19.95	18.51	19.47	5.83	19.43
TRINITY_DN41106_c0_g6	K12812	EC:3.6.4.13	2.25391	up	AIP2	DEAD-box ATP-dependent RNA helicase 15 isoform X1 [Oryza sativa Japonica Group]	1.06	3.33	0.51	1.77	1.51	1.46	0.18	0.3	0.47	0.74	0.29	0.71	1.61	0.45
TRINITY_DN41108_c1_g1	K02998	-	2.10136	up	GSVIVT00034021001	40S ribosomal protein SA (P40)/Laminin receptor 1 [Handroanthus impetiginosus]	0.58	0.74	1.58	0.81	1.12	0.73	0.25	0.2	0.21	0.12	0.13	0.44	0.93	0.23
TRINITY_DN41113_c0_g4	K12891	-	1.70926	up	SC35	serine/arginine-rich splicing factor SC35 [Sesamum indicum]	0.1	0.15	0.38	0.39	0.47	0.14	0.09	0.09	0.07	0.06	0.09	0.26	0.27	0.11
TRINITY_DN41113_c0_g6	K00012	EC:1.1.1.22	1.21197	up	UGD1	UDP-glucose 6-dehydrogenase 3-like [Nicotiana tabacum]	250.28	277.21	261.1	197.4	237.25	303.89	30.02	36.52	163.57	132.25	301.29	222.12	254.52	147.63
TRINITY_DN41140_c0_g1	K16903	EC:2.6.1.99	-1.61043	down	TAR4	PREDICTED: tryptophan aminotransferase-related protein 4-like [Populus euphratica]	6.08	13.53	3.72	4.84	13.33	11.44	17.2	53.47	22.67	51.17	4.75	57.01	8.82	34.38
TRINITY_DN41146_c2_g5	K03231	-	1.68115	up	EF1	elongation factor 1-alpha [Elaeis guineensis]	85.91	111.75	102.04	145.86	154.42	115.9	57.03	45.74	60.23	42.33	35.16	43.64	119.31	47.35
TRINITY_DN41150_c2_g2	K00417	-	-2.29582	down	QCR7-2	cytochrome b-c1 complex subunit 7-2 [Hevea brasiliensis]	0.6	2.25	0.89	0.44	0.84	1	9.38	8.06	4.15	7.23	5.27	4.86	1	6.49
TRINITY_DN41171_c1_g4	K00058	EC:1.1.1.95 1.1.1.399	-2.74695	down	PGDH1	D-3-phosphoglycerate dehydrogenase 3, chloroplastic-like isoform X2 [Hevea brasiliensis]	1.64	1.19	1.14	1.21	1.09	1.16	11.31	7.89	8.62	10.89	12.12	14.54	1.24	10.9
TRINITY_DN41175_c0_g2	K03661	-	1.69336	up	VHA-c''1	V-type proton ATPase subunit c''2 isoform X1 [Abrus precatorius]	3.87	4.03	5.93	4.1	3.54	2.48	1.4	1.81	1.3	1.81	0.98	3.11	3.99	1.74
TRINITY_DN41189_c1_g2	K20726	-	-1.96231	down	RTE1	PREDICTED: protein REVERSION-TO-ETHYLENE SENSITIVITY1 isoform X1 [Populus euphratica]	0.23	0.13	0.31	0.04	0.36	0.12	0.71	1.85	1.17	1.27	1.09	0.98	0.2	1.18
TRINITY_DN41190_c0_g4	K02973	-	1.26677	up	RPS23	predicted protein [Hordeum vulgare subsp. vulgare]	2.41	7.74	7.64	8.83	14.74	12.23	3.66	2.64	3.62	5.74	7.47	7.49	8.93	5.1
TRINITY_DN41193_c0_g1	K14494	-	5.33062	up	SCR	scarecrow-like protein 21 [Manihot esculenta]	2.71	1.14	10.01	6.3	0.72	2.37	0.03	0.14	0.06	0	0	0.54	3.88	0.13
TRINITY_DN41193_c0_g2	K14494	-	8.98985	up	SCR	hypothetical protein MANES_18G099600 [Manihot esculenta]	48.4	8.62	156.46	37.32	14.99	30.2	0.2	0.21	0.09	0.22	0.06	0.03	49.33	0.14
TRINITY_DN41199_c0_g1	K05391	-	2.2213	up	CNGC20	hypothetical protein CTI12_AA041140 [Artemisia annua]	15.77	8.71	3.8	8.1	10.91	8.62	2.71	2.23	3.33	3.01	4.6	6.4	9.32	3.71
TRINITY_DN41200_c2_g2	K13719	EC:3.1.2.-	-1.41367	down	CG4603	hypothetical protein EUGRSUZ_F00764 [Eucalyptus grandis]	10.92	14.06	6.07	8.63	5.86	15.22	37.61	33.57	41.84	44.9	32.65	50.06	10.13	40.11
TRINITY_DN41203_c0_g1	K00627	EC:2.3.1.12	1.40766	up	At3g13930	dihydrolipoyllysine-residue acetyltransferase component 2 of pyruvate dehydrogenase complex, mitochondrial-like [Hevea brasiliensis]	43.23	48.64	38.09	41.91	35.38	28.68	16.13	20.64	19.58	20.4	23.39	19.62	39.32	19.96
TRINITY_DN41203_c0_g7	K00627	EC:2.3.1.12	1.2415	up	At3g13930	dihydrolipoyllysine-residue acetyltransferase component 2 of pyruvate dehydrogenase complex, mitochondrial-like isoform X1 [Durio zibethinus]	43.02	40.08	37.87	35.2	38.32	30.03	18.26	23.22	24.59	25.09	27.33	27.2	37.42	24.28
TRINITY_DN41207_c2_g5	K14317	-	1.14676	up	NUP1	nuclear pore complex protein NUP1 isoform X1 [Jatropha curcas]	10.13	8.39	7.92	18.92	15.21	10.43	9.44	10.21	5.53	6.6	5.83	6.87	11.83	7.41
TRINITY_DN41207_c2_g6	K14317	-	1.20162	up	NUP1	nuclear pore complex protein NUP1 [Ricinus communis]	74.58	70.17	34.41	75.74	50.41	51.24	26.94	35.49	35.89	31.12	33.86	37.32	59.42	33.44
TRINITY_DN41208_c1_g1	K15397	EC:2.3.1.199	3.7511	up	KCS19	LOW QUALITY PROTEIN: 3-ketoacyl-CoA synthase 19-like [Ricinus communis]	2.45	1.38	2.41	0	6.43	1.83	0	0.06	0	0.23	0	1.06	2.42	0.23
TRINITY_DN41211_c0_g1	K12611	EC:3.-.-.-	-1.27586	down	-	hypothetical protein MANES_09G051800 [Manihot esculenta]	3.48	5.56	2.65	3.4	2.66	2.38	12.17	11.24	8.75	10.86	11.18	11.3	3.35	10.92
TRINITY_DN41225_c3_g9	K03246	-	1.03032	up	TIF3I1	LOW QUALITY PROTEIN: eukaryotic translation initiation factor 3 subunit I-like [Olea europaea var. sylvestris]	16.41	28.95	14.3	18.61	15.12	21.52	35.73	32.65	24.89	26.92	29.31	17.51	19.15	27.83
TRINITY_DN41244_c0_g1	K00847	EC:2.7.1.4	-1.07308	down	At1g66430	PfkB-like carbohydrate kinase family protein [Theobroma cacao]	6.37	8.31	3.56	4.56	8.06	6.76	15.63	15.26	19.61	16.7	17.06	16.99	6.27	16.88
TRINITY_DN41248_c0_g2	K00162	EC:1.2.4.1	-1.19292	down	-	pyruvate dehydrogenase E1 component subunit beta-3, chloroplastic [Hevea brasiliensis]	12.03	14.88	5.13	8.77	16.43	12.67	29.45	23.53	34.32	39.13	41.37	40.57	11.65	34.73
TRINITY_DN41249_c0_g4	K01193	EC:3.2.1.26	5.21159	up	CWINV1	beta-fructofuranosidase, cell wall isozyme-like [Manihot esculenta]	8.83	6.36	71.87	17.72	11.56	12.22	0.66	0.41	0.51	0.94	0.34	1.49	21.43	0.72
TRINITY_DN41276_c1_g1	K01623	EC:4.1.2.13	1.98548	up	-	fructose-bisphosphate aldolase 5, cytosolic [Sesamum indicum]	0.69	0.82	1.35	1.49	1.09	1.49	0.19	0.42	0.16	0.02	0.79	0.7	1.16	0.38
TRINITY_DN41279_c0_g9	K09458	EC:2.3.1.179	1.41755	up	KAS12	3-oxoacyl-[acyl-carrier-protein] synthase I, chloroplastic [Jatropha curcas]	9.26	14.1	4.98	12.52	13.55	17.94	5.46	4.84	6	6.89	6.71	5	12.06	5.82
TRINITY_DN41282_c3_g2	K00850	EC:2.7.1.11	-1.18159	down	PFK4	PREDICTED: ATP-dependent 6-phosphofructokinase 4, chloroplastic [Juglans regia]	3.36	5.62	3.22	3.65	2.48	1.89	7.65	11	7.84	10.24	12.2	10.63	3.37	9.93
TRINITY_DN41283_c1_g9	K00549	EC:2.1.1.14	1.80689	up	MET	methionine synthase [Phelipanche ramosa]	1.22	0.77	1.32	1.66	1.12	1.48	0.2	0.44	0.27	0.11	0.66	1.14	1.26	0.47
TRINITY_DN41288_c0_g1	K00844	EC:2.7.1.1	4.05445	up	At1g50460	PREDICTED: hexokinase-3 isoform X1 [Populus euphratica]	6.73	10.16	11.88	15.79	8.76	9.98	0	0.57	1.41	0.65	1.47	2.37	10.55	1.08
TRINITY_DN41289_c0_g1	K04506	EC:2.3.2.27	2.54037	up	SINAT2	E3 ubiquitin-protein ligase SINAT2-like isoform X1 [Manihot esculenta]	5.67	2.01	0.92	0	1.71	3.16	0.26	0.55	1.16	0.26	0.23	1.02	2.24	0.58
TRINITY_DN41290_c4_g2	K03094	-	1.09921	up	NAC035	NAM domain-containing protein [Cephalotus follicularis]	13.56	26.13	9.07	26.46	9.61	7.72	9.43	12.92	6.11	10.22	6.14	9.47	15.42	9.05
TRINITY_DN41305_c1_g1	K14484	-	4.40492	up	IAA17	auxin-responsive protein IAA1 [Ricinus communis]	55.61	61.71	104.45	223.09	131.97	80.3	5.74	10.84	8.67	6.79	9.32	4.18	109.52	7.59
TRINITY_DN41308_c0_g1	K15893	-	-2.07448	down	HPR-A	hydroxypyruvate reductase [Bruguiera gymnorhiza]	133.85	189.89	207.56	176.58	278.31	185.35	1325.55	1236.07	1080.5	952.36	761.58	1102.56	195.26	1076.44
TRINITY_DN41311_c0_g1	K01652	EC:2.2.1.6	1.69597	up	NTMC2T6.1	C2 domain-containing protein At1g53590 isoform X1 [Sesamum indicum]	0.15	0.2	0.26	0.14	0.15	0.18	0.01	0.03	0.03	0.05	0.19	0.11	0.18	0.07
TRINITY_DN41311_c0_g6	K00121	EC:1.1.1.284 1.1.1.1	2.30763	up	At1g17220	hypothetical protein MANES_18G064700 [Manihot esculenta]	2.62	5.71	6.74	10.34	6.72	3.04	5.66	2.38	3.69	5.15	4.21	4.92	5.86	4.33
TRINITY_DN41313_c0_g3	K13414	EC:2.7.11.25	-1.6713	down	M3KE1	MAPKKKe [Nicotiana benthamiana]	1.94	2.7	1.66	1.8	1.34	1.86	4.44	4.67	4.46	4.25	3.8	3.2	1.88	4.14
TRINITY_DN41322_c0_g2	K14544	-	1.75087	up	PI4KG2	phosphatidylinositol 4-kinase gamma 3-like [Manihot esculenta]	39.69	50.06	25.04	31.59	32.18	41.28	9.64	15.9	14.7	15.74	13.34	15.46	36.64	14.13
TRINITY_DN41326_c4_g1	K14407	-	1.05169	up	-	cleavage stimulating factor 64 isoform X1 [Manihot esculenta]	11.91	14.85	7.98	16.63	13.11	13.14	6.77	9.63	7.24	8.53	10.51	5.98	12.94	8.11
TRINITY_DN41327_c0_g2	K21026	EC:3.1.1.80	4.39798	up	At3g48460	PREDICTED: acetylajmalan esterase-like [Daucus carota subsp. sativus]	11.72	8.36	18.76	10.07	10.04	11.03	0.76	0.83	1	0.73	0.55	0.4	11.66	0.71
TRINITY_DN41358_c1_g4	K02699	-	2.1636	up	PSAL	photosystem I reaction center subunit XI, chloroplastic-like [Olea europaea var. sylvestris]	1.58	0.85	1.73	2.5	1.54	2.35	0.32	0.76	0.13	0.06	1	0.79	1.76	0.51
TRINITY_DN41365_c0_g1	K15919	-	-3.02553	down	HPR3	glyoxylate/hydroxypyruvate reductase HPR3-like [Manihot esculenta]	1.6	1.19	0.88	1.12	1.18	0.57	13.83	16.78	8.68	7.36	9.1	7.1	1.09	10.47
TRINITY_DN41373_c0_g3	K00162	EC:1.2.4.1	1.99904	up	Os08g0536000	hypothetical protein OsI_30038 [Oryza sativa Indica Group]	18.68	21.91	29.92	24.3	20.56	19.98	4.72	5.87	7.26	7.88	11.42	7.52	22.56	7.45
TRINITY_DN41377_c0_g4	K00660	EC:2.3.1.74	3.74269	up	CHS3	hypothetical protein CCACVL1_10094 [Corchorus capsularis]	0.67	3.88	0.32	1.38	4.8	5.34	0.07	0.07	0.35	0.26	0.35	0.48	2.73	0.26
TRINITY_DN41397_c0_g2	K12619	EC:3.1.13.-	1.5528	up	XRN3	5'-3' exoribonuclease 3-like isoform X1 [Hevea brasiliensis]	35.56	38.84	30.71	46.04	36.17	29.3	15.68	17.3	16.32	14.32	14.19	17.61	36.1	15.9
TRINITY_DN41397_c0_g3	K10773	EC:4.2.99.18	1.36179	up	ZFP6	zinc finger protein GIS3-like, partial [Hevea brasiliensis]	3.14	0.76	1.69	0.54	0.99	2.91	1.71	1.92	1.56	0.84	0.41	0.94	1.67	1.23
TRINITY_DN41398_c1_g1	K10683	-	2.44428	up	PCMP-H28	pentatricopeptide repeat-containing protein At4g21065 isoform X1 [Manihot esculenta]	4.4	9.48	20.8	14.67	7.89	7.7	2.11	2.73	2.78	2.51	1.72	3.87	10.82	2.62
TRINITY_DN41411_c0_g3	K11517	EC:1.1.3.15	-1.479	down	GLO1	Aldolase-type TIM barrel [Cynara cardunculus var. scolymus]	4.51	6.77	6.23	6.3	7.19	4.52	33.05	27.19	17.54	27.97	12.5	21.85	5.92	23.35
TRINITY_DN41422_c1_g2	K00640	EC:2.3.1.30	2.4607	up	SAT5	serine acetyltransferase 5 [Durio zibethinus]	59.01	52.84	29	38.84	65.88	42.75	6.65	8.55	9.53	11.55	15.86	15.31	48.05	11.24
TRINITY_DN41430_c1_g1	K16221	-	-1.83642	down	TCP8	transcription factor TCP8 [Jatropha curcas]	0.86	2.19	0.44	0.24	0.93	0.54	4.73	5.27	3.48	5.47	1.07	2.61	0.87	3.77
TRINITY_DN41433_c2_g3	K05933	EC:1.14.17.4	-3.56085	down	ACO	1-amino-cyclopropane-1-carboxylic acid oxidase 3 [Manihot esculenta]	1.07	0.51	1.46	0.66	1.01	1.54	1.82	1.03	1.99	77.51	13.14	6.85	1.04	17.06
TRINITY_DN41435_c1_g5	K00815	EC:2.6.1.5	7.6444	up	At5g53970	PREDICTED: nicotianamine aminotransferase A [Elaeis guineensis]	2.19	0	4.26	0.32	0.91	1.43	0	0	0	0	0	0	1.52	0
TRINITY_DN41444_c1_g1	K04079	-	2.01133	up	HSC80	heat shock protein 90-2 [Cryptocoryne ciliata]	1170.18	1076.45	367.98	927.26	787.57	991.59	167.74	257.36	237.53	258.15	169.98	248.24	886.84	223.17
TRINITY_DN41449_c0_g5	K01611	EC:4.1.1.50	1.31197	up	SAMDC	S-adenosylmethionine decarboxylase [Handroanthus impetiginosus]	0.21	0.24	0.18	0.38	0.4	0.48	0.07	0.04	0.09	0.06	0.46	0.24	0.31	0.16
TRINITY_DN41457_c0_g1	K11752	EC:3.5.4.26 1.1.1.193	1.44266	up	PYRR	riboflavin biosynthesis protein PYRR, chloroplastic [Cajanus cajan]	34.25	29.1	36.31	44.88	25.38	39.71	20.06	21.46	19.15	29.31	20.79	35.87	34.94	24.44
TRINITY_DN41458_c1_g1	K01051	EC:3.1.1.11	1.42553	up	-	21 kDa protein [Jatropha curcas]	30.9	23.5	23.7	91.75	30.85	70.55	36.82	10.62	16.71	45.33	6.41	16.22	45.21	22.02
TRINITY_DN41463_c0_g6	K19730	-	-1.43351	down	ATG101	autophagy-related protein 101 isoform X1 [Manihot esculenta]	3.79	7.3	4.46	5.02	2.96	4.28	18.25	17.87	14.09	15.33	15.34	14.34	4.64	15.87
TRINITY_DN41464_c0_g1	K11583	-	1.43806	up	B''DELTA	serine/threonine protein phosphatase 2A regulatory subunit B''alpha-like isoform X1 [Hevea brasiliensis]	11.55	12.58	6.08	10.96	9.46	10.19	4.81	5.04	6.59	3.78	3.6	3.21	10.14	4.51
TRINITY_DN41464_c0_g2	K11583	-	2.67425	up	B''BETA	Parvalbumin [Parasponia andersonii]	4.99	11.69	1.46	3.62	4.55	5.25	0.85	0.83	1.52	0.53	0.41	2.01	5.26	1.03
TRINITY_DN41464_c0_g3	K11583	-	1.7857	up	-	-	3.6	3.73	0.51	1.82	1.34	2.21	1.5	0.8	0.4	0.89	0.66	0.52	2.2	0.79
TRINITY_DN41465_c4_g6	K10781	EC:3.1.2.14 3.1.2.21	2.71626	up	FATB1	plastid acyl-ACP thioesterase [Vernicia fordii]	162.28	161.04	269.73	237.51	158.27	206.9	11.26	11.8	62.22	30.7	62.7	59.98	199.29	39.78
TRINITY_DN41472_c3_g3	K01623	EC:4.1.2.13	3.86061	up	HIPP39	hypothetical protein VITISV_019514 [Vitis vinifera]	9.94	5.92	1.97	3.16	2.54	8.01	0.25	0.32	0.54	0.33	0.29	0.52	5.26	0.38
TRINITY_DN41472_c3_g4	K03781	EC:1.11.1.6	1.91564	up	-	truncated catalase 2 [Avicennia marina]	3.89	5.03	11.99	11.27	8.31	9.35	4.93	2.88	0.25	0.11	3.96	4.92	8.31	2.84
TRINITY_DN41474_c1_g8	K19475	-	-2.51483	down	-	uncharacterized protein LOC105635737 [Jatropha curcas]	0.06	0	0.06	0.03	0.36	0.26	0.33	0.71	0.58	2.47	0.99	1.49	0.13	1.09
TRINITY_DN41485_c1_g10	K01193	EC:3.2.1.26	8.50431	up	INVA	vacuolar invertase [Manihot esculenta]	14.61	0.95	59	4.59	8.7	19.86	0	0	0.15	0.15	0	0	17.95	0.05
TRINITY_DN41497_c2_g2	K08730	EC:2.7.8.29	2.76798	up	PSS1	CDP-diacylglycerol--serine O-phosphatidyltransferase 1 isoform X2 [Jatropha curcas]	6.35	10.49	10.93	17.87	14.18	7.78	1.02	2.55	1.81	2.58	1.58	3.84	11.27	2.23
TRINITY_DN41499_c0_g10	K02716	-	-1.8882	down	PSBO	hypothetical protein CDL15_Pgr018374 [Punica granatum]	101.18	128.01	232	214.25	728.45	420.34	2107.66	1632.46	1451.51	1593.26	944.52	1308.08	304.04	1506.25
TRINITY_DN41499_c0_g2	K02716	-	-1.58935	down	PSBO	chloroplast PsbO4 precursor [Nicotiana benthamiana]	23.08	17.82	29.87	25.8	93.45	37.6	328.24	246.41	260.57	265.74	170.52	163.72	37.94	239.2
TRINITY_DN41499_c0_g3	K02716	-	7.99356	up	PSBO	PREDICTED: oxygen-evolving enhancer protein 1, chloroplastic [Nicotiana attenuata]	0	0	5.7	0	2.83	0	0	0	0	0	0	0	1.42	0
TRINITY_DN41503_c0_g2	K05658	EC:3.6.3.44	1.24786	up	ABCB6	ABC transporter B family member 20-like [Hevea brasiliensis]	16.21	24.64	17.1	23.22	18.1	14.27	12.16	12.18	10.68	9.78	7.27	9.4	18.92	10.24
TRINITY_DN41505_c0_g3	K15744	EC:5.2.1.12	3.71441	up	-	uncharacterized protein LOC105628422 isoform X1 [Jatropha curcas]	4.78	6.75	4.59	8.72	4.12	10.49	0.52	0.68	0.75	0.35	1.3	1.38	6.58	0.83
TRINITY_DN41515_c0_g6	K13265	EC:1.1.1.348	1.90477	up	-	vestitone reductase [Sesamum indicum]	0.46	0.1	1.68	1.41	0.78	1.04	0.47	0.46	0.18	0	0.23	0.66	0.91	0.33
TRINITY_DN41530_c0_g1	K12812	EC:3.6.4.13	1.25898	up	-	uncharacterized protein LOC110816443 [Carica papaya]	0.64	0.42	0.83	0.62	0.92	0.68	0.03	0.07	0.56	0.16	0.33	1.07	0.69	0.37
TRINITY_DN41549_c3_g1	K14498	EC:2.7.11.1	4.07791	up	SAPK10	Serine/threonine-protein kinase SRK2E [Vitis vinifera]	46.3	63.34	31.34	45.17	38.87	36.52	2.93	3.82	3.09	2.91	2.92	3.28	43.59	3.16
TRINITY_DN41552_c0_g1	K16055	EC:2.4.1.15 3.1.3.12	-1.35817	down	TPS5	Glycosyl transferase, family 20 [Corchorus capsularis]	7.06	7.03	6.52	5.01	9.06	9.94	23.33	26.92	25.54	28.81	22.22	22.56	7.44	24.9
TRINITY_DN41558_c0_g2	K03514	EC:2.7.7.19	-2.72887	down	-	hypothetical protein MANES_07G140200 [Manihot esculenta]	0.68	0.84	0.82	0.74	0.41	0.63	5.85	4.73	3.29	4.92	3.01	3.71	0.69	4.25
TRINITY_DN41561_c3_g3	K13066	EC:2.1.1.68	-2.06491	down	COMT	quercetin 3-O-methyltransferase 1 isoform X2 [Jatropha curcas]	7.82	7.03	5.9	10.44	8.81	8.23	46.5	60.39	34.3	37.86	38.22	43.54	8.04	43.47
TRINITY_DN41562_c2_g3	K13126	-	1.58457	up	PAB8	PREDICTED: polyadenylate-binding protein 8-like [Tarenaya hassleriana]	15.31	16.99	11.77	13.71	12.6	18.31	6.28	5.75	7.51	6.23	5.98	6.61	14.78	6.39
TRINITY_DN41572_c0_g2	K13065	EC:2.3.1.133	3.94269	up	SALAT	BAHD acyltransferase At5g47980 [Populus trichocarpa]	125.85	66.09	159.65	102.04	69.61	82.57	4.32	8.79	10.38	9.04	7.42	12.4	100.97	8.72
TRINITY_DN41573_c0_g1	K01623	EC:4.1.2.13	1.47732	up	FAB6	Fructose-biphosphate aldolase [Handroanthus impetiginosus]	0.27	0.22	0.49	0.48	0.45	0.5	0.16	0.19	0.1	0.1	0.27	0.3	0.4	0.19
TRINITY_DN41574_c0_g2	K14492	-	-4.05707	down	RR4	PREDICTED: two-component response regulator ARR17-like [Populus euphratica]	0.27	0.55	0.33	0.21	0.44	0.23	4.64	5.55	8.24	4.32	16.04	6.09	0.34	7.48
TRINITY_DN41577_c1_g1	K12450	EC:4.2.1.76	1.82663	up	RHM1	Trifunctional UDP-glucose, partial [Mucuna pruriens]	57.87	94.73	46.37	126.03	59.65	59.63	13.26	19.4	35.1	29.27	40.13	34.43	74.05	28.6
TRINITY_DN41598_c1_g1	K00430	EC:1.11.1.7	4.6953	up	PNC2	cationic peroxidase 2-like [Durio zibethinus]	0.9	0.47	9.92	3.22	11.14	5.04	0	0	0.45	0	0.91	0	5.11	0.23
TRINITY_DN41602_c0_g4	K13424	-	5.50216	up	WRKY24	WRKY transcription factor WRKY24-like isoform X2 [Abrus precatorius]	250.61	293.59	132.63	237.32	175.17	216.43	1.15	2.21	8.72	4.91	12.94	7.22	217.63	6.19
TRINITY_DN41602_c0_g7	K18834	-	-2.75309	down	WRKY20	probable WRKY transcription factor 20 isoform X2 [Ricinus communis]	0.42	1.3	0.39	0.21	0.37	0.59	6.15	6.25	6.27	3.79	3.76	3.45	0.55	4.94
TRINITY_DN41607_c0_g1	K12133	-	1.1519	up	LHY	transcription factor LHY [Populus nigra]	37.95	55.44	19.75	35.62	29.86	37.19	19.63	22.49	16.25	20	30.09	18.42	35.97	21.15
TRINITY_DN41609_c0_g13	K02126	-	1.18862	up	Mtatp6	H-transporting ATPase (mitochondrion) [Lobosphaera incisa]	16.55	24.84	82.65	97.78	83.64	104.76	24.4	31.35	33.16	46.38	53.35	55.24	68.37	40.65
TRINITY_DN41609_c0_g15	K03880	EC:1.6.5.3	1.43027	up	Mtnd3	NADH dehydrogenase subunit 3 [Chaetosphaeridium globosum]	9.75	17.03	43	68.77	56.02	67.96	11.8	11.02	23.32	33.56	20.87	35.34	43.76	22.65
TRINITY_DN41609_c0_g16	K02262	-	1.45152	up	mt-Co3	cytochrome c oxidase subunit 3 (mitochondrion) [Nephroselmis olivacea]	10.54	15.21	61.83	63.14	61.97	75.45	13.94	13.67	21.85	24.91	34.11	35.14	48.02	23.94
TRINITY_DN41609_c0_g19	K03881	EC:1.6.5.3	1.37217	up	Mtnd4	NADH dehydrogenase subunit 4 (mitochondrion) [Roya obtusa]	4.19	6.55	25.23	30.73	25.62	30.6	6.35	6.97	9.36	11.25	13.93	15.54	20.49	10.57
TRINITY_DN41610_c3_g8	K14497	EC:3.1.3.16	6.32	up	Os01g0656200	PREDICTED: probable protein phosphatase 2C 51 [Populus euphratica]	7.28	11.22	30.55	21.26	39.63	20.22	0.18	0.35	0.35	0.17	0.18	0.86	21.69	0.35
TRINITY_DN41614_c2_g1	K00759	EC:2.4.2.7	-2.68215	down	APT4	adenine phosphoribosyltransferase 3 isoform X1 [Populus trichocarpa]	0.68	1.09	3.59	1.28	4	2.1	25.66	20.02	22.73	19.8	9.59	10.73	2.12	18.09
TRINITY_DN41620_c1_g4	K03681	-	-1.69669	down	exosc3	putative exosome complex component rrp40 [Jatropha curcas]	12.78	9.9	5.76	10.43	14.25	5.68	29.57	34.93	29.79	31.41	28.08	31.43	9.8	30.87
TRINITY_DN41624_c0_g1	K00847	EC:2.7.1.4	-2.16461	down	FLN2	fructokinase-like 2, chloroplastic [Manihot esculenta]	0.7	1.2	0.78	1.01	2.52	1.19	8.02	6.7	5.94	7.73	4.7	7.28	1.23	6.73
TRINITY_DN41626_c0_g1	K00858	EC:2.7.1.23	-1.48998	down	Os09g0345700	NADH kinase isoform X1 [Hevea brasiliensis]	1.19	1.85	0.99	0.46	1.58	1.04	6.64	5.87	5.07	3.38	2.48	3.85	1.19	4.55
TRINITY_DN41633_c1_g4	K12492	-	1.42733	up	AGD7	probable ADP-ribosylation factor GTPase-activating protein AGD6 [Hevea brasiliensis]	37.3	58.05	26.34	41.34	31.82	47.19	19.39	18.74	17.76	25.08	17.29	19.32	40.34	19.6
TRINITY_DN41656_c3_g2	K14292	EC:2.1.1.-	-2.5624	down	WOX4	WUSCHEL-related homeobox 4 [Hevea brasiliensis]	1.1	1.41	0.44	0.57	0.45	0.55	3.31	3.98	4.18	8.21	4.11	5.07	0.75	4.81
TRINITY_DN41658_c0_g1	K00383	EC:1.8.1.7	-1.08858	down	EMB2360	glutathione reductase [Dimocarpus longan]	17.47	22.44	20.14	23.23	26.21	21.74	67.22	59.34	60.07	52.56	52.5	61.46	21.87	58.86
TRINITY_DN41659_c1_g7	K05665	-	-3.66184	down	ABCC15	putative ABC transporter C family member 15 isoform X2 [Manihot esculenta]	0.3	0.31	0.52	0.08	0.36	0.08	5.96	5.22	3.82	4.26	3.06	5.17	0.27	4.58
TRINITY_DN41661_c1_g2	K14558	-	1.57769	up	TPR1	topless-related protein 3-like isoform X2 [Abrus precatorius]	17.79	24.26	27.9	22.12	19.1	14.12	6.85	8.71	12.22	6.9	7.33	8.43	20.88	8.41
TRINITY_DN41665_c0_g5	K00826	EC:2.6.1.42	1.70377	up	BCAT3	PREDICTED: branched-chain-amino-acid aminotransferase 5, chloroplastic-like isoform X2 [Malus domestica]	7.02	16.14	6.41	9.16	6.2	6.64	1.61	2.25	2.67	4.71	4.81	4.18	8.6	3.37
TRINITY_DN41668_c3_g2	K14288	-	1.16867	up	PSD	PREDICTED: exportin-T [Nicotiana attenuata]	12.07	3.68	9.27	5.96	5.53	4.51	3.61	3.9	3.3	3.3	2.29	3.51	6.84	3.32
TRINITY_DN41671_c0_g1	K09699	EC:2.3.1.168	1.83018	up	DAG	hypothetical protein CDL12_24930 [Handroanthus impetiginosus]	0.22	0.14	0.31	0.37	0.23	0.17	0.03	0.12	0.02	0	0.15	0.21	0.24	0.09
TRINITY_DN41672_c2_g3	K14494	-	1.43591	up	SCL23	scarecrow-like protein 23 [Manihot esculenta]	3.12	2.04	4.74	2.54	2.24	2.04	0.96	2.36	1.03	1.88	0.53	1.41	2.79	1.36
TRINITY_DN41673_c0_g6	K20802	EC:4.1.2.10	2.07436	up	SABP2	salicylic acid-binding protein 2-like [Sesamum indicum]	1.89	1.64	1.33	1.6	1.7	1.81	0.22	0.28	0.23	0.06	1.05	1.21	1.66	0.51
TRINITY_DN41674_c0_g2	K18835	-	4.88655	up	WRKY75	WRKY domain containing protein [Trema orientale]	55.65	6.98	9.6	6.73	3.58	22.21	0.07	0.37	0.68	0.33	1.1	0.86	17.46	0.57
TRINITY_DN41678_c1_g5	K20606	EC:2.7.11.25	-1.18577	down	ANP1	mitogen-activated protein kinase kinase kinase ANP1-like isoform X2 [Manihot esculenta]	1.07	1.53	0.69	2.05	0.99	0.88	4.57	5.75	6.5	3.58	7.02	3.35	1.2	5.13
TRINITY_DN41683_c0_g9	K14173	EC:4.2.3.46	4.22035	up	TPS7	alpha-farnesene synthase [Populus trichocarpa]	5.53	2.18	2.66	2.24	0.14	4.68	0.08	0.3	0.12	0.05	0.53	0.12	2.9	0.2
TRINITY_DN41688_c1_g1	K12451	EC:5.1.3.- 1.1.1.-	1.80867	up	NRS/ER	bifunctional dTDP-4-dehydrorhamnose 3,5-epimerase/dTDP-4-dehydrorhamnose reductase [Manihot esculenta]	14.17	18.81	16.71	22.98	14.13	20.66	2.92	3.03	7.02	6.36	8.18	7.44	17.91	5.82
TRINITY_DN41689_c0_g9	K14570	EC:3.1.-.-	2.21688	up	SDN5	small RNA degrading nuclease 5 isoform X2 [Hevea brasiliensis]	2.51	3.24	2.47	2.75	2.73	2.29	1.39	0.73	0.33	1.43	0.33	0.14	2.66	0.72
TRINITY_DN41691_c0_g1	K12581	-	1.17004	up	CAF1-7	probable CCR4-associated factor 1 homolog 7 [Ricinus communis]	45.59	62.15	24.49	44.98	43.88	34.74	13.59	18.53	47.69	24.9	27.85	30.51	42.64	27.18
TRINITY_DN41695_c0_g1	K00030	EC:1.1.1.41	1.12112	up	IDH3	isocitrate dehydrogenase [NAD] regulatory subunit 1, mitochondrial isoform X1 [Ananas comosus]	30.06	29.4	15.36	20.6	16.3	20.35	15.2	16.46	16.89	21.48	21.66	19.01	22.01	18.45
TRINITY_DN41696_c0_g2	K00857	EC:2.7.1.21	-1.09726	down	TK1B	thymidine kinase a [Populus trichocarpa]	5.46	8.93	3.63	4.89	5.79	5.79	11.88	11.7	11.41	11.09	9.37	13.73	5.75	11.53
TRINITY_DN41712_c0_g5	K13993	-	3.10026	up	HSP18.2	heat-shock protein, putative [Ricinus communis]	89.07	52.82	17.26	37.2	38.25	57.11	3.18	10.64	10.04	7.68	6.28	6.62	48.62	7.41
TRINITY_DN41719_c0_g8	K14488	-	1.50013	up	SAUR32	auxin-responsive protein SAUR32-like [Manihot esculenta]	23.04	16.25	32.49	20.19	15.15	23.46	14.18	20.41	5.24	13.87	2.68	4.08	21.76	10.08
TRINITY_DN41723_c2_g2	K19366	-	-1.59494	down	ERD7	hypothetical protein MANES_04G074700 [Manihot esculenta]	11.81	18.12	14.52	11.48	8.2	9.33	6.67	7.33	46.25	36.85	113.3	81.53	12.24	48.65
TRINITY_DN41732_c1_g1	K05677	-	-1.33649	down	ABCC1	ABC transporter D family member 1 [Ricinus communis]	9.02	9.43	9.31	9.23	9.3	8.4	41.33	39.94	35.27	24.71	24.66	22.05	9.11	31.33
TRINITY_DN41732_c2_g1	K14488	-	-2.07971	down	TSN	translin [Ricinus communis]	4.57	9.05	2.79	3.25	5.36	4.74	21.26	25.48	28.74	34.19	28.25	34.83	4.96	28.79
TRINITY_DN41734_c0_g1	K13065	EC:2.3.1.133	2.23973	up	SALAT	PREDICTED: vinorine synthase [Theobroma cacao]	21.68	5.18	9.33	2.93	11.95	6.47	1.76	2.07	4.08	1.57	1.9	4.64	9.59	2.67
TRINITY_DN41734_c2_g1	K13065	EC:2.3.1.133	6.91294	up	ACT	PREDICTED: vinorine synthase [Theobroma cacao]	464.91	43.74	389.56	69.97	134.49	111.24	1.47	1.2	2.91	2.42	2.9	2.63	202.32	2.26
TRINITY_DN41734_c2_g3	K13065	EC:2.3.1.133	6.63016	up	ACT	vinorine synthase-like [Herrania umbratica]	21.91	18.2	6.29	7.55	5.85	19.94	0.63	0.03	0.03	0.17	0.03	0.06	13.29	0.16
TRINITY_DN41737_c5_g1	K12486	-	4.3291	up	AGD5	hypothetical protein CISIN_1g009702mg [Citrus sinensis]	27.08	16.72	13.96	13.35	16.36	21.97	0.44	0.93	2.92	0.2	1.28	0.53	18.24	1.05
TRINITY_DN41738_c0_g1	K13347	-	2.03532	up	PMP22	PREDICTED: peroxisomal membrane protein PMP22-like [Malus domestica]	46.8	51.33	46.52	24.51	53.47	31.19	11.24	15.35	15.98	16.13	21.45	21.51	42.3	16.94
TRINITY_DN41754_c0_g2	K01490	EC:3.5.4.6	-2.8282	down	-	hypothetical protein CQW23_12237 [Capsicum baccatum]	1.13	0.85	0.18	0.17	0.41	0.71	5.63	7.52	4.71	4.94	3.87	4.17	0.58	5.14
TRINITY_DN41762_c1_g4	K02639	-	-2.42681	down	fdxH	uncharacterized protein LOC105631988 [Jatropha curcas]	9.26	26.42	11.57	15.9	47.23	24.62	185.64	179.33	152.86	170.95	100.77	158.32	22.5	157.98
TRINITY_DN41762_c1_g8	K02881	-	6.38915	up	-	uncharacterized protein LOC107423173 [Ziziphus jujuba]	10.2	14.65	4.37	8.83	10.48	13.62	0.09	0.21	0.33	0.2	0	0.08	10.36	0.15
TRINITY_DN41765_c0_g2	K13424	-	2.6791	up	WRKY40	probable WRKY transcription factor 40 [Hevea brasiliensis]	83.25	22.99	25.67	23.69	46	76.52	0.48	1.11	5.64	5.56	18.83	17.99	46.35	8.27
TRINITY_DN41768_c1_g2	K01637	EC:4.1.3.1	4.46105	up	-	PREDICTED: isocitrate lyase-like [Gossypium hirsutum]	1.63	4.06	3.33	2	2.16	3.69	0.09	0.38	0.15	0.15	0.05	0.17	2.81	0.17
TRINITY_DN41771_c0_g1	K02885	-	-1.85933	down	RPD1	protein ROOT PRIMORDIUM DEFECTIVE 1-like [Hevea brasiliensis]	12.37	15.64	5.06	7.31	12.4	10.44	62.9	57.31	46.24	45.5	28.25	46.51	10.54	47.79
TRINITY_DN41774_c2_g2	K00297	EC:1.5.1.20	1.06376	up	MTHFR1	unknown [Populus trichocarpa]	29.5	34.9	32.8	31.8	30.62	27.96	14.54	20.43	20.67	20.3	18.71	23.87	31.26	19.75
TRINITY_DN41782_c2_g2	K02924	-	1.17678	up	RPL39A	hypothetical protein SETIT_1G351900v2, partial [Setaria italica]	68.66	96.16	50.43	72.25	80.82	80.36	38.31	38.02	45.53	50.99	41.93	44.2	74.78	43.16
TRINITY_DN41788_c0_g1	K01850	EC:5.4.99.5	1.03081	up	CM1	chorismate mutase 1, chloroplastic [Jatropha curcas]	25.4	38.25	25.82	31.72	28.03	27.15	18.95	17.34	15.05	20.61	18.55	15.23	29.39	17.62
TRINITY_DN41795_c4_g1	K00696	EC:2.4.1.14	1.14934	up	SPS4	unnamed protein product, partial [Vitis vinifera]	3.75	8.69	5.65	5.26	4.36	5.44	3.98	2.89	2.01	4.13	2.76	3.07	5.52	3.14
TRINITY_DN41805_c1_g2	K14490	-	1.80927	up	-	PREDICTED: histidine-containing phosphotransfer protein 4-like [Populus euphratica]	1.65	0.93	4.03	2.89	1.88	1.37	0.99	0.68	1.25	0.58	0.71	0.88	2.12	0.85
TRINITY_DN41816_c6_g1	K13248	EC:3.1.3.74	2.55377	up	-	inorganic pyrophosphatase 1 [Populus trichocarpa]	25.45	9.63	12.97	434.55	5.34	10.96	2.19	4.58	8.12	5.73	90.46	3.32	83.15	19.07
TRINITY_DN41817_c0_g1	K01528	EC:3.6.5.5	2.03018	up	DRP1E	dynamin-related protein 1E [Sesamum indicum]	18.28	16.9	19.74	16.9	15.27	15.78	5.45	4.34	4.92	6.1	6.71	5.39	17.14	5.48
TRINITY_DN41819_c0_g1	K19891	EC:3.2.1.39	2.73868	up	At4g29360	hypothetical protein JCGZ_00942 [Jatropha curcas]	8.98	20.62	6.93	6.97	16.68	6.95	1.34	2.9	2.18	2.59	0.67	3	11.19	2.11
TRINITY_DN41819_c0_g3	K19891	EC:3.2.1.39	2.56085	up	At2g01630	glucan endo-1,3-beta-glucosidase 12 [Ricinus communis]	11.25	22.08	6.97	6.21	16.62	8.36	0.73	4.01	3.17	2.96	0.88	3.68	11.91	2.57
TRINITY_DN41823_c0_g1	K06123	EC:1.1.1.101	-1.64333	down	RDH8	uncharacterized protein LOC7456933 [Populus trichocarpa]	0.36	0.93	1.3	0.51	0.73	0.97	3.15	2.72	3.57	4.24	2.63	3.42	0.8	3.29
TRINITY_DN41826_c0_g1	K00797	EC:2.5.1.16	-4.72204	down	-	spermidine synthase 1 isoform X2 [Hevea brasiliensis]	0.41	0	0.27	1.17	0	0.11	5.55	5.5	3.36	4.76	3.48	3.27	0.33	4.32
TRINITY_DN41848_c3_g4	K14595	EC:2.4.1.263	7.5569	up	TOGT1	uncharacterized protein LOC8288161 [Ricinus communis]	557.3	755.63	285.67	658.79	289.09	349.82	2.43	3.58	4.4	2.64	3.79	2.55	482.72	3.23
TRINITY_DN41866_c1_g1	K01184	EC:3.2.1.15	4.51767	up	VEP1	3-oxo-Delta(4,5)-steroid 5-beta-reductase [Jatropha curcas]	138.08	80.88	203.19	199.05	82.73	171.51	6.17	6.19	20.37	7.04	7.7	4.71	145.91	8.7
TRINITY_DN41868_c1_g1	K14489	EC:2.7.13.3	-3.5163	down	AHK4	histidine kinase 4 isoform X2 [Populus trichocarpa]	0.96	0.27	2.12	0.33	1.44	0.71	10.88	9.49	13.99	16.18	8.53	10.25	0.97	11.55
TRINITY_DN41868_c1_g8	K05666	-	1.83518	up	ABCC4	ABC transporter C family member 14 [Ricinus communis]	17.17	16.27	6.88	9.56	10.56	12.9	3.66	3.74	4.34	4.7	3.81	5.06	12.22	4.22
TRINITY_DN41871_c0_g3	K14497	EC:3.1.3.16	5.26904	up	AHG1	probable protein phosphatase 2C 75 isoform X1 [Jatropha curcas]	7.63	15.98	13.03	20.57	22.84	9.66	0.38	0.61	0.67	0.89	0.39	0.33	14.95	0.55
TRINITY_DN41874_c1_g2	K01738	EC:2.5.1.47	1.44765	up	OASB	unknown [Picea sitchensis]	0.32	0.19	0.44	0.37	0.45	0.21	0.21	0.22	0.07	0.1	0.13	0.33	0.33	0.18
TRINITY_DN41875_c1_g8	K01673	EC:4.2.1.1	1.90398	up	-	PREDICTED: carbonic anhydrase, chloroplastic-like [Erythranthe guttata]	4.67	3.46	6.58	6.07	6.39	5.54	1	1.04	1.53	0.58	2.7	4.83	5.45	1.95
TRINITY_DN41876_c1_g5	K08915	-	-1.69994	down	LHCB4.3	PREDICTED: chlorophyll a-b binding protein CP29.3, chloroplastic [Eucalyptus grandis]	51.49	98.07	196.78	114.2	216.8	211.2	705.13	665.02	698.36	680.73	309.03	751.81	148.09	635.01
TRINITY_DN41885_c1_g1	K00928	EC:2.7.2.4	2.0041	up	AK2	hypothetical protein TSUD_287080 [Trifolium subterraneum]	1.69	2.18	3.88	4.68	3.15	3.35	1.01	0.84	0.38	0.22	1.41	2.27	3.15	1.02
TRINITY_DN41901_c1_g1	K13420	EC:2.7.11.1	5.80466	up	XA21	probable LRR receptor-like serine/threonine-protein kinase At3g47570 [Hevea brasiliensis]	9.14	2.61	6.08	2.66	5.18	5.32	0.07	0.02	0.37	0.02	0	0.27	5.17	0.12
TRINITY_DN41902_c3_g1	K02133	EC:3.6.3.14	2.84915	up	Atp5b	ATP synthase subunit beta, mitochondrial [Jatropha curcas]	0.08	0.26	2.81	2.42	2.96	2.76	0.17	0.14	0.19	0.24	0.71	0.64	1.88	0.35
TRINITY_DN41904_c1_g3	K08330	-	1.71963	up	ATG11	PREDICTED: autophagy-related protein 11 [Prunus mume]	14.06	4.25	9.64	2.5	4.07	6.86	3.73	1.23	0.41	4.29	3.29	4.38	6.9	2.89
TRINITY_DN41905_c0_g1	K00549	EC:2.1.1.14	-1.44474	down	FTIP1	FT-interacting protein 1-like [Manihot esculenta]	0.29	0.31	0.55	0.3	1.3	2.74	1.19	4.98	2.66	6.46	3.25	3.15	0.92	3.61
TRINITY_DN41907_c0_g1	K12355	EC:1.2.1.68	2.14915	up	ALDH2C4	Aldehyde dehydrogenase [Handroanthus impetiginosus]	0.3	0.44	0.68	0.5	0.43	0.6	0.12	0.05	0.12	0.05	0.56	0.24	0.49	0.19
TRINITY_DN41907_c0_g12	K14494	-	-1.20666	down	NSP2	nodulation-signaling pathway 2 protein [Manihot esculenta]	1.61	3.76	0.16	1.09	1.91	1.03	1.08	2.08	2.08	7.98	6.98	7.44	1.59	4.61
TRINITY_DN41907_c0_g7	K19892	EC:3.2.1.39	1.41519	up	At1g32860	glucan endo-1,3-beta-glucosidase 14-like [Sesamum indicum]	0.61	0.2	0.31	0.6	0.49	0.35	0.24	0.31	0.04	0.05	0.28	0.44	0.43	0.23
TRINITY_DN41909_c0_g5	K14575	-	-1.0853	down	CIP111	LOW QUALITY PROTEIN: calmodulin-interacting protein 111-like [Hevea brasiliensis]	4.78	7.54	4.55	4.85	4.24	3.98	12.86	12.59	10.31	10.88	8.16	10.11	4.99	10.82
TRINITY_DN41921_c2_g3	K15095	EC:1.1.1.208	4.91696	up	SDR2b	(+)-neomenthol dehydrogenase-like isoform X1 [Ziziphus jujuba]	0.49	1.16	1.86	1.28	1.09	0.77	0.02	0.06	0	0.08	0.05	0.08	1.11	0.05
TRINITY_DN41940_c1_g2	K13412	EC:2.7.11.1	-1.63477	down	CRK3	CDPK-related kinase 4-like isoform X2 [Hevea brasiliensis]	0.42	0.46	1.28	0.42	2.02	0.75	2.53	2.56	3.59	5.42	0.54	4.04	0.89	3.11
TRINITY_DN41944_c1_g2	K00549	EC:2.1.1.14	2.1306	up	MET	5-methyltetrahydropteroyltriglutamate--homocysteine methyltransferase-like [Hevea brasiliensis]	36	64.81	83.82	76.79	55.95	50.55	7.8	12.67	17.77	22.03	15.63	17.09	61.32	15.5
TRINITY_DN41946_c2_g5	K11584	-	-1.02916	down	B'IOTA	serine/threonine protein phosphatase 2A 57 kDa regulatory subunit B' kappa isoform [Jatropha curcas]	1.21	1.66	0.56	1.19	2.78	2.08	2.36	4.53	4.16	5.91	3.27	4.63	1.58	4.14
TRINITY_DN41947_c1_g3	K05605	EC:3.1.2.4	-3.11312	down	At2g30650	3-hydroxyisobutyryl-CoA hydrolase 1 [Populus trichocarpa]	0.17	0.31	0	0	0.22	0.17	3.87	2.26	1.25	1.77	0.99	0.97	0.14	1.85
TRINITY_DN41949_c2_g1	K18875	-	-1.91242	down	SAG101	senescence-associated carboxylesterase 101 isoform X2 [Ricinus communis]	2.66	1.4	1.47	0.6	0.92	0.86	3.98	3.8	6.83	4.58	8.14	9.06	1.32	6.07
TRINITY_DN41962_c3_g6	K10258	EC:1.3.1.93	1.31826	up	Os07g0493400	very-long-chain enoyl-CoA reductase-like [Hevea brasiliensis]	73.69	72.37	88.51	56.88	40.06	67.92	16.44	18.89	51.52	31.11	49.79	42.57	66.57	35.05
TRINITY_DN41965_c1_g5	K20557	-	1.71987	up	VIP1	transcription factor VIP1-like [Hevea brasiliensis]	10.46	12.48	14.69	20.95	13.3	12.97	6.75	6.16	5.66	5.54	4.29	5.5	14.14	5.65
TRINITY_DN41966_c0_g1	K13448	-	3.33918	up	CML5	Calmodulin-like 11, putative [Theobroma cacao]	40.15	3.95	46.39	1.78	11.37	14.45	0.07	0	3.77	0.56	2.39	7.69	19.68	2.41
TRINITY_DN41970_c0_g1	K09518	-	-1.00007	down	ATJ49	chaperone protein dnaJ 49 [Hevea brasiliensis]	9.46	10.84	4.68	7.47	10.16	7.22	27.11	24.67	18.01	19.5	17.24	19.55	8.3	21.01
TRINITY_DN41971_c4_g5	K05894	EC:1.3.1.42	3.35183	up	OPR3	probable glucan endo-1,3-beta-glucosidase BG4 [Prunus avium]	254.08	161.98	299.05	189.3	91.7	220.29	3.96	2.62	31.21	14.39	65.25	42.03	202.73	26.58
TRINITY_DN41974_c1_g1	K03873	-	-1.18153	down	-	PREDICTED: uncharacterized protein LOC105131887 [Populus euphratica]	12.02	10.51	15.17	11.75	12.13	8.15	28.68	30.76	30.76	37.32	25.75	27.9	11.62	30.2
TRINITY_DN41982_c0_g4	K09659	-	-1.29738	down	-	dolichol-phosphate mannose synthase subunit 3-like isoform X1 [Hevea brasiliensis]	1.25	4.2	2.63	2.68	2.87	1.26	7.52	8.88	6.94	9.55	7.3	6.58	2.48	7.79
TRINITY_DN41990_c1_g1	K13065	EC:2.3.1.133	8.02707	up	CHAT	omega-hydroxypalmitate O-feruloyl transferase [Hevea brasiliensis]	13.46	0.03	20.49	0.61	1.59	20.41	0.07	0	0	0.15	0	0.05	9.43	0.05
TRINITY_DN41999_c1_g1	K09753	EC:1.2.1.44	1.57599	up	CCR1	cinnamoyl-CoA reductase-like SNL6 [Quercus suber]	19.32	14.05	11.66	12.94	15.08	14.18	5.38	6.67	7.17	6.51	6.07	5.62	14.54	6.24
TRINITY_DN42005_c0_g2	K07512	EC:1.3.1.38	-1.17325	down	At3g45770	enoyl-[acyl-carrier-protein] reductase, mitochondrial [Manihot esculenta]	4.92	5.07	4.99	3.08	4.08	3.27	13.66	14.03	11.83	9.06	10.38	10.07	4.24	11.51
TRINITY_DN42007_c2_g3	K15376	EC:2.10.1.1 2.7.7.75	-1.13256	down	CNX1	molybdopterin biosynthesis protein CNX1 isoform X1 [Citrus clementina]	3.8	4.44	3.75	4.5	2.25	2.88	11.38	9.58	8.9	8.77	11.05	12.33	3.6	10.33
TRINITY_DN42008_c2_g3	K14484	-	4.29881	up	IAA26	auxin-responsive protein IAA26-like isoform X1 [Hevea brasiliensis]	44.44	78.56	8.54	35.33	56.45	58.1	1.73	2.18	2.26	2.12	6.72	2.96	46.9	2.99
TRINITY_DN42009_c0_g1	K00011	EC:1.1.1.21	-2.0047	down	S6PDH	NADP-dependent D-sorbitol-6-phosphate dehydrogenase-like [Hevea brasiliensis]	17.35	14.87	4.54	11.52	15.04	12.63	73.65	62.44	71.56	59.87	60.83	56.89	12.66	64.21
TRINITY_DN42016_c0_g1	K14677	EC:3.5.1.14	-1.81823	down	Acy1	aminoacylase-1 [Hevea brasiliensis]	2.94	3.78	1.52	1.41	6.42	2.93	9.36	10.55	14.72	17.73	15.4	18.07	3.17	14.31
TRINITY_DN42024_c0_g4	K20217	EC:2.3.2.23	-2.34161	down	COP10	constitutive photomorphogenesis protein 10 [Populus trichocarpa]	2.48	4.14	3.51	2.73	3.23	2.49	19.77	20.49	20.39	21.08	19.88	20.31	3.1	20.32
TRINITY_DN42033_c0_g2	K01051	EC:3.1.1.11	-1.77562	down	GT-2	trihelix transcription factor GT-2-like [Hevea brasiliensis]	3.49	4.71	1.62	0.35	2.76	2.99	14.45	21.55	10.24	14.96	2.8	8.83	2.65	12.14
TRINITY_DN42033_c0_g4	K01051	EC:3.1.1.11	-2.08557	down	GT-2	trihelix transcription factor GT-2 [Populus trichocarpa]	0.49	0.37	0.49	0.08	1.06	1.97	5.06	7.75	3.04	6.53	1.06	1.69	0.74	4.19
TRINITY_DN42036_c1_g1	K13436	EC:2.7.11.1	1.67668	up	PTI13	PTI1-like tyrosine-protein kinase 3 isoform C [Glycine soja]	73.93	99.58	69.91	102.06	65.7	61.07	16.69	17.65	46.8	25.02	42.74	43.27	78.71	32.03
TRINITY_DN42042_c0_g1	K14490	-	-2.96896	down	AHP4	histidine-containing phosphotransfer protein 4 [Populus trichocarpa]	3.53	18.94	3.39	11.05	1.26	0.93	120.17	100.89	54.49	17.74	5.63	25.54	6.52	54.08
TRINITY_DN42043_c0_g4	K04125	EC:1.14.11.13	3.30536	up	GA2OX8	Oxoglutarate/iron-dependent dioxygenase [Corchorus olitorius]	26.99	37.48	16.97	16.35	17.53	19.45	2.06	2.6	4.19	1	4.58	2.71	22.46	2.86
TRINITY_DN42052_c1_g2	K03404	EC:6.6.1.1	-5.78139	down	CHLD	PREDICTED: magnesium-chelatase subunit ChlD, chloroplastic [Populus euphratica]	0	0	0.45	0.25	0	0	22.56	15.69	3.15	12.71	2.42	5.65	0.12	10.36
TRINITY_DN42053_c4_g3	K12900	-	4.09314	up	ERF114	ethylene-responsive transcription factor ERF115-like [Hevea brasiliensis]	14.42	27.16	22.69	21.61	17.2	16.36	0.71	1.31	1.49	0.49	0.29	6.33	19.91	1.77
TRINITY_DN42055_c3_g3	K00679	EC:2.3.1.158	4.33935	up	PDAT1	phospholipid:diacylglycerol acyltransferase 1-like [Quercus suber]	10.03	10.7	2.6	7.42	18.13	13.51	0.59	0	0	0.52	1.04	2.65	10.4	0.8
TRINITY_DN42069_c1_g11	K12617	-	1.57963	up	-	hypothetical protein POPTR_016G020632 [Populus trichocarpa]	33.08	33.53	30.44	49.89	20.07	26.76	8.45	12.19	18.49	11.78	17.91	15.45	32.29	14.04
TRINITY_DN42071_c0_g3	K14496	-	3.06581	up	PYL8	Polyketide cyclase/dehydrase [Cinnamomum micranthum f. kanehirae]	12.57	24.7	11.35	6.03	14.25	12.3	0.33	1.98	2.66	4.1	1.66	1.93	13.53	2.11
TRINITY_DN42080_c2_g4	K12173	-	7.39669	up	TL1	thaumatin-like protein 1 [Hevea brasiliensis]	189.96	30.82	215.98	264.19	32.82	186.87	1.1	1.6	0.55	1.85	0.59	1.63	153.44	1.22
TRINITY_DN42085_c1_g2	K13348	-	-2.14798	down	MPV17	protein Mpv17 isoform X2 [Jatropha curcas]	0.9	1.17	1.33	0.88	1.41	1.24	5.07	6.79	6.58	8.72	6.12	6.88	1.16	6.69
TRINITY_DN42088_c0_g1	K01176	EC:3.2.1.1	1.62114	up	-	PREDICTED: pentatricopeptide repeat-containing protein At2g04860 isoform X1 [Juglans regia]	5.04	3.86	6.89	3.47	2.78	6.86	1.56	1.88	1.92	2.24	2.19	2.67	4.82	2.08
TRINITY_DN42088_c0_g2	K01176	EC:3.2.1.1	1.15218	up	-	PREDICTED: non-specific lipid-transfer protein-like [Populus euphratica]	79.09	71.7	35.81	47.45	47.31	76.35	21.67	29.12	41.05	30.72	45.82	42.32	59.62	35.12
TRINITY_DN42094_c2_g3	K00128	EC:1.2.1.3	6.58226	up	ALDH2B7	aldehyde dehydrogenase family 2 member B4, mitochondrial [Medicago truncatula]	1.8	0.34	29.45	0.63	0.87	1.16	0.08	0.04	0.25	0	0.07	0.04	5.71	0.08
TRINITY_DN42095_c1_g8	K13811	EC:2.7.7.4 2.7.1.25	6.2189	up	APS1	hypothetical protein Ahy_B09g100174 isoform C [Arachis hypogaea]	1154.85	1061.37	894.55	1243.82	200.98	1324.78	16.88	13.78	13.64	8.63	12.88	8.34	980.06	12.36
TRINITY_DN42097_c0_g1	K08908	-	-3.36969	down	-	hypothetical protein KK1_011300 [Cajanus cajan]	38.11	55.23	55.68	74.19	158.41	109.94	1431.84	1241.59	1005.8	1127.68	738.8	1004.78	81.93	1091.75
TRINITY_DN42097_c0_g2	K08910	-	9.20886	up	lhcA-P4	PREDICTED: chlorophyll a-b binding protein P4, chloroplastic [Nicotiana attenuata]	0	0	18.96	0	10.51	0	0	0	0	0	0	0	4.91	0
TRINITY_DN42097_c0_g3	K08910	-	-5.936	down	lhcA-P4	PREDICTED: chlorophyll a-b binding protein P4, chloroplastic [Populus euphratica]	20.45	20.62	35.04	13.22	60.33	21.56	3267.76	2664.65	1749.18	2367.16	1210.11	2244.08	28.54	2250.49
TRINITY_DN42098_c2_g9	K01187	EC:3.2.1.20	8.94606	up	At1g30700	hypothetical protein POPTR_011G162900 [Populus trichocarpa]	30.69	1.54	82.92	6.16	8.16	12.77	0.26	0.06	0.03	0.03	0	0	23.71	0.06
TRINITY_DN42103_c2_g2	K01051	EC:3.1.1.11	2.33163	up	PME54	pectinesterase [Sesamum indicum]	0.29	0.05	0.22	0.51	0.3	0.48	0	0	0	0	0.1	0.38	0.31	0.08
TRINITY_DN42104_c1_g2	K13946	-	-1.86091	down	LAX2	PREDICTED: auxin transporter-like protein 2 [Erythranthe guttata]	8.27	4.79	7.44	4.2	8.47	6.8	28.23	27.36	31.35	40.31	41.42	38.96	6.66	34.61
TRINITY_DN42107_c0_g1	K09503	-	-2.84361	down	BBD1	bifunctional nuclease 1 [Herrania umbratica]	9.36	12.98	11.19	12.53	9.23	8.74	133.96	115.89	93.46	92.77	55.14	88.56	10.67	96.63
TRINITY_DN42110_c0_g1	K01809	EC:5.3.1.8	3.12508	up	OLE9	glucan endo-1,3-beta-D-glucosidase isoform X1 [Sesamum indicum]	1.44	1.22	0.75	1.09	1.11	1.48	0.11	0.16	0.22	0.15	0.2	0.2	1.18	0.17
TRINITY_DN42111_c2_g1	K01187	EC:3.2.1.20	-2.17619	down	-	Alpha-glucosidase 2 isoform D [Glycine soja]	5.55	7.38	7.67	6.82	4.76	3.15	43.1	40.43	32.15	32.18	31.63	31.7	5.89	35.2
TRINITY_DN42118_c0_g1	K13260	EC:1.14.13.89 1.14.13.53	-3.48511	down	CYP81E8	hypothetical protein AQUCO_02800121v1 [Aquilegia coerulea]	6.25	4.4	3.42	1.79	2.91	6.47	34.04	45.7	42.34	43.34	136.06	63.72	4.21	60.87
TRINITY_DN42119_c0_g2	K01771	EC:4.6.1.13	-2.75546	down	plcA	PI-PLC X-box domain-containing protein DDB_G0293730 [Ricinus communis]	6.63	13.18	7.42	8.78	8.44	5.48	88.44	93.96	48.43	100.78	34.21	60.46	8.32	71.05
TRINITY_DN42124_c1_g1	K13495	EC:2.4.1.215	1.77039	up	ZOX1	zeatin O-glucosyltransferase [Sesamum indicum]	0.21	0.46	0.76	0.75	0.64	0.31	0.17	0.09	0.02	0.04	0.25	0.6	0.52	0.19
TRINITY_DN42126_c2_g1	K12486	-	-2.08352	down	CAR11	protein C2-DOMAIN ABA-RELATED 11 [Ricinus communis]	2.11	4.28	1.35	1.61	5.02	3.33	15.16	17.85	14.88	17.09	18.25	14.27	2.95	16.25
TRINITY_DN42132_c1_g4	K12580	-	-1.08473	down	-	general negative regulator of transcription subunit 3 isoform X1 [Jatropha curcas]	0.89	4.21	2.23	2.2	1.29	0.7	6.2	3.58	3.61	3.79	1.51	5.53	1.92	4.04
TRINITY_DN42144_c2_g1	K16221	-	-2.34149	down	TCP19	transcription factor TCP19 [Hevea brasiliensis]	1.04	0.87	0.61	0.37	0.65	0.39	4.04	4.33	6.04	4.76	2.35	4.14	0.66	4.28
TRINITY_DN42144_c2_g2	K16221	-	2.67043	up	TCP14	transcription factor TCP15-like [Durio zibethinus]	26.33	56.88	11.93	31.92	30.07	29.79	3.28	5.94	2.83	11.47	7.23	6.79	31.15	6.26
TRINITY_DN42147_c0_g1	K03857	EC:2.4.1.198	-1.82389	down	PIGA	phosphatidylinositol N-acetylglucosaminyltransferase subunit A [Quercus suber]	1.25	1.63	1.39	0.64	0.47	0.72	7.42	7.98	6.42	7.49	5.32	5.98	1.02	6.77
TRINITY_DN42148_c0_g9	K03241	-	-1.03353	down	-	hypothetical protein CQW23_26650 [Capsicum baccatum]	3.39	4.91	5.46	3.68	3.21	4.07	11.54	14.05	11.15	13.09	8.27	9.36	4.12	11.24
TRINITY_DN42150_c1_g2	K01850	EC:5.4.99.5	-1.06257	down	-	uncharacterized protein LOC111429732 [Cucurbita moschata]	1.89	2.48	1.33	1.64	4.6	3.56	7.91	7.15	6.64	7.67	3.57	6.79	2.58	6.62
TRINITY_DN42169_c0_g1	K00759	EC:2.4.2.7	1.15665	up	APT1	hypothetical protein CICLE_v10002024mg [Citrus clementina]	95.27	94.05	51.81	56.48	74.3	110.12	38.92	39.51	52.89	51.21	51.27	57.6	80.34	48.57
TRINITY_DN42186_c1_g10	K01868	EC:6.1.1.3	-2.45122	down	-	hypothetical protein EUGRSUZ_A01066 [Eucalyptus grandis]	2.74	4.42	4.58	6.35	4.57	4.37	44.87	40.32	23.02	41.36	16.19	24.87	4.5	31.77
TRINITY_DN42187_c1_g5	K13429	-	-2.04254	down	LYK3	PREDICTED: lysM domain receptor-like kinase 3 isoform X1 [Theobroma cacao]	5.23	7.45	4.46	3.4	4.25	4.02	21.03	23.22	26.09	33.84	24.29	28.79	4.8	26.21
TRINITY_DN42216_c1_g10	K12867	-	1.34151	up	PAP29	putative DNA repair exonuclease SIA1 [Handroanthus impetiginosus]	0.3	0.54	0.74	0.84	1.09	0.83	0.15	0.19	0.22	0.18	0.63	0.86	0.72	0.37
TRINITY_DN42218_c0_g2	K02884	-	-1.0691	down	At4g17560	50S ribosomal protein L19-1, chloroplastic [Jatropha curcas]	17.31	24.98	20.59	32.64	54.59	40.86	94.42	87.47	97	88.02	67.25	84.3	31.83	86.41
TRINITY_DN42219_c3_g2	K02736	EC:3.4.25.1	-1.57057	down	PBG1	20S proteasome, regulatory subunit beta type PSMB4/PRE4 [Handroanthus impetiginosus]	22.47	26.37	8.31	12.17	15.16	16.05	69.1	70.46	74.69	64.08	68.38	69.25	16.75	69.33
TRINITY_DN42227_c1_g2	K13423	-	5.13149	up	WRKY75	probable WRKY transcription factor 75 [Populus trichocarpa]	28.5	61.47	49.43	33.6	36.28	84.87	0.11	0.11	1.5	0.66	3.36	4.63	49.02	1.73
TRINITY_DN42229_c0_g1	K02959	-	1.05614	up	RPS16-2	30S ribosomal protein S16-2, chloroplastic/mitochondrial [Herrania umbratica]	25.55	32.1	11.85	28.41	18.31	19.7	14.86	14.69	15.19	13.92	12.15	12.99	22.65	13.97
TRINITY_DN42233_c0_g1	K08911	-	-1.41168	down	LHCA5	PREDICTED: photosystem I chlorophyll a/b-binding protein 5, chloroplastic [Theobroma cacao]	28.34	35.97	44.51	38.74	76.02	56.73	232.39	201.19	171.9	169.53	104.81	159.07	46.72	173.15
TRINITY_DN42234_c1_g2	K02736	EC:3.4.25.1	-1.08616	down	PBG1	proteasome subunit beta type-4 [Manihot esculenta]	4.49	5.93	3.43	3.37	3.3	4.96	12.14	12.09	12.45	10.78	10.19	11.22	4.25	11.48
TRINITY_DN42236_c1_g1	K03644	EC:2.8.1.8	-2.08	down	LIP1P-2	PREDICTED: lipoyl synthase 2, chloroplastic [Populus euphratica]	1.88	1.3	1.05	0.52	2.17	0.99	6.87	9.89	9.07	7.6	12.33	8.87	1.32	9.1
TRINITY_DN42236_c1_g3	K12135	-	-6.22318	down	COL16	zinc finger protein CONSTANS-LIKE 16 [Carica papaya]	0	0	0	0	2.44	0	107.49	113.75	13.47	40.62	2.7	5.16	0.41	47.2
TRINITY_DN42237_c0_g1	K00859	EC:2.7.1.24	-1.10059	down	COAE	hypothetical protein POPTR_010G206900 [Populus trichocarpa]	6.63	9.18	2.2	5.12	3.79	5.2	12.33	16.61	13.98	14.65	14.16	12.07	5.35	13.97
TRINITY_DN42249_c0_g2	K03537	EC:3.1.26.5	3.28846	up	EMB1687	probable ribonuclease P/MRP protein subunit POP5 [Hevea brasiliensis]	27.96	19.21	46.62	30.57	17.75	28.15	3.79	3.26	4.47	2.5	4.58	4.53	28.38	3.86
TRINITY_DN42262_c2_g3	K13459	-	-1.70143	down	At5g43740	probable disease resistance protein At5g63020 [Manihot esculenta]	1.03	3.33	1.67	2.74	7.46	2.16	12.49	18.42	11.49	14	6.73	12.17	3.06	12.55
TRINITY_DN42262_c2_g4	K13459	-	-1.8557	down	At1g61180	PREDICTED: probable disease resistance protein At5g63020 isoform X2 [Vitis vinifera]	0.58	1.77	0.09	0.53	1.4	0.59	3.94	4.72	5.08	3.65	2.18	2.73	0.83	3.72
TRINITY_DN42271_c2_g2	K00121	EC:1.1.1.284 1.1.1.1	2.17789	up	At4g22110	Alcohol dehydrogenase, class III [Handroanthus impetiginosus]	0.12	0.17	0.43	0.44	0.28	0.23	0.03	0.15	0.01	0.03	0.13	0.12	0.28	0.08
TRINITY_DN42277_c2_g2	K21797	EC:3.1.3.-	2.1216	up	SAC2	phosphoinositide phosphatase SAC3 [Populus trichocarpa]	59.35	65.29	66.41	88.44	50.03	97.93	15.95	18.94	23.03	32.47	23.13	28.24	71.24	23.63
TRINITY_DN42283_c1_g2	K05677	-	-1.53101	down	ABCC1	PREDICTED: ABC transporter D family member 1-like [Gossypium raimondii]	8.39	7.77	7.26	8.1	5.66	4.02	19.42	15.72	20.09	15.94	17.16	19.08	6.87	17.9
TRINITY_DN42286_c1_g1	K08908	-	-1.32023	down	LHCA6	Chlorophyll A-B binding protein, plant [Corchorus olitorius]	18.69	36.22	22.53	32.27	75.12	39.38	153.59	124.48	145.33	117.43	87.66	125.61	37.37	125.68
TRINITY_DN42286_c1_g2	K08908	-	2.23496	up	-	hypothetical protein CDL12_13375 [Handroanthus impetiginosus]	4.85	3.19	6.38	7.13	4.36	5.89	1.23	1.98	0.21	0.27	2.3	3.04	5.3	1.51
TRINITY_DN42289_c1_g1	K04125	EC:1.14.11.13	-4.87717	down	GA2OX8	gibberellin 2-beta-dioxygenase 8 [Populus trichocarpa]	0.33	0	0.46	0.03	0.13	0.17	12.16	9.43	2.55	17.62	6.9	1.39	0.19	8.34
TRINITY_DN42300_c1_g1	K08907	-	8.45617	up	CAB6A	PREDICTED: chlorophyll a-b binding protein 6A, chloroplastic [Nicotiana attenuata]	0	0	12.18	0	6.08	0	0	0	0	0	0	0	3.04	0
TRINITY_DN42300_c1_g2	K08907	-	1.71516	up	CAB6A	chlorophyll a-b binding protein 6A, chloroplastic [Rosa chinensis]	6.15	5.91	12.32	9.01	8.99	9.01	5.52	4.36	1.5	1.66	4.88	3.52	8.56	3.57
TRINITY_DN42300_c1_g3	K08907	-	7.65991	up	CAB6A	PREDICTED: chlorophyll a-b binding protein 6A, chloroplastic-like [Nicotiana sylvestris]	0	0	8.6	0	6.03	0	0	0	0	0	0	0	2.44	0
TRINITY_DN42300_c1_g4	K08907	-	-3.93858	down	LHCA1	chlorophyll a-b binding protein 6, chloroplastic [Populus trichocarpa]	21.29	28.04	33.79	59.66	69.9	45.55	1285.04	982.11	685.98	798.64	621.03	767.23	43.04	856.67
TRINITY_DN42304_c0_g1	K03231	-	1.47165	up	-	elongation factor 1A [Avicennia marina]	1.85	2.88	4.93	3.94	3.68	4.69	1.04	1.18	1.5	0.72	2.59	3.5	3.66	1.75
TRINITY_DN42307_c0_g2	K14492	-	-3.1605	down	ARR3	two-component response regulator ARR5-like isoform X2 [Hevea brasiliensis]	0.76	0.53	1	0.82	1.43	0.63	12.44	13.6	5.24	10.16	10.15	9.22	0.86	10.13
TRINITY_DN42309_c1_g1	K05278	EC:1.14.20.6	3.02533	up	FLS	flavonol synthase/flavanone 3-hydroxylase [Citrus sinensis]	3.68	11.24	4.42	8.83	13.82	16.51	1.39	1.95	1.16	1.94	1.54	1.31	9.75	1.55
TRINITY_DN42309_c1_g3	K05278	EC:1.14.20.6	1.60435	up	FLS	PREDICTED: flavonol synthase/flavanone 3-hydroxylase [Nelumbo nucifera]	1.53	2.41	0.93	0.62	7.37	4.6	0	0.33	0.99	0.77	0.48	1.8	2.91	0.73
TRINITY_DN42309_c1_g5	K05278	EC:1.14.20.6	3.7048	up	FLS	flavonol synthase/flavanone 3-hydroxylase [Ziziphus jujuba]	0.95	2.4	0.93	2.34	2.61	3.08	0.16	0.4	0.12	0.08	0.23	0.19	2.05	0.2
TRINITY_DN42326_c0_g1	K00901	EC:2.7.1.107	4.83983	up	DGK5	diacylglycerol kinase 5-like isoform X1 [Hevea brasiliensis]	13.58	10.53	28.2	9.41	6.81	14.43	0	1.37	0	0	2.05	0	13.83	0.57
TRINITY_DN42330_c4_g3	K10143	EC:2.3.2.27	-1.66942	down	SPA3	hypothetical protein POPTR_011G119500 [Populus trichocarpa]	23.53	26.33	19.27	14.17	22.74	17.82	113.97	110	66.4	87.87	57.84	75.84	20.64	85.32
TRINITY_DN42331_c1_g4	K10808	EC:1.17.4.1	2.72903	up	-	ribonucleoside-diphosphate reductase small chain [Ziziphus jujuba]	2.25	3.93	7.07	5.86	6.61	3.72	0.15	0.27	0.69	1.07	1.31	2.42	4.91	0.98
TRINITY_DN42334_c0_g1	K03009	-	2.61871	up	NRPB12	DNA-directed RNA polymerases II, IV and V subunit 12 [Vigna radiata var. radiata]	51.56	59.6	64.59	75.72	67.85	48.76	10.95	10.16	12.83	14.6	16.01	15.57	61.35	13.35
TRINITY_DN42334_c0_g2	K03009	-	-2.20734	down	NRPB12	DNA-directed RNA polymerases II, IV and V subunit 12 isoform X2 [Arachis duranensis]	10.9	5.27	7.16	5.04	6.74	6.15	35.94	51.38	54.26	50.11	55.68	32.87	6.88	46.71
TRINITY_DN42339_c2_g7	K14411	-	-1.19394	down	RNP1	heterogeneous nuclear ribonucleoprotein 1 isoform X1 [Jatropha curcas]	2.02	2.21	0.6	1.86	1.38	0.86	4.76	5.3	3.37	5.51	3.24	4.13	1.49	4.38
TRINITY_DN42348_c2_g1	K03257	-	-2.41965	down	-	eukaryotic initiation factor 4A-14-like [Prunus yedoensis var. nudiflora]	42.33	50.98	27.65	37.33	42.32	33.62	328.96	305.09	272.64	248.14	229.48	270.98	39.04	275.88
TRINITY_DN42354_c1_g4	K10580	EC:2.3.2.23	2.32724	up	UBC35	ubiquitin-conjugating enzyme E2 35-like [Cucumis sativus]	9.5	10.42	15.72	10.7	7.89	9.48	1.84	1.98	4.14	2.34	2.96	3.33	10.62	2.76
TRINITY_DN42358_c0_g1	K13458	-	-1.8691	down	RAR1	cysteine and histidine-rich domain-containing protein RAR1 [Manihot esculenta]	3.45	4.6	4.46	3.42	1.7	1.89	14.99	14.19	15.4	15.45	15.9	15.47	3.25	15.23
TRINITY_DN42360_c1_g2	K11247	-	1.76772	up	SH3P2	SH3 domain-containing protein 1 [Manihot esculenta]	10.97	13.64	8.96	10.21	11.21	11.2	5.45	5.77	6.24	7.27	5.92	6.85	11.03	6.25
TRINITY_DN42362_c0_g1	K03109	-	-1.65586	down	SRP9	Signal recognition particle 9 kDa protein [Morus notabilis]	6.69	8.97	5.15	5.62	6.47	4.75	20.47	28.1	25.59	24.91	26.9	26.13	6.28	25.35
TRINITY_DN42367_c0_g2	K18819	EC:2.4.1.123	1.41702	up	GOLS1	galactinol synthase 1-like [Sesamum indicum]	0.23	0.15	0.87	0.89	0.92	0.46	0.09	0.09	0.31	0.08	0.34	0.85	0.59	0.29
TRINITY_DN42367_c0_g4	K18819	EC:2.4.1.123	4.4952	up	GOLS2	galactinol synthase [Manihot esculenta]	11.4	22.69	33.6	38.64	47.53	14.63	1.28	1.44	0.71	1.84	2.69	1.73	28.08	1.61
TRINITY_DN42367_c0_g5	K18819	EC:2.4.1.123	4.15617	up	GOLS1	Glycosyl transferase, family 8 [Corchorus capsularis]	3.02	42.28	12.08	28.34	52.53	18.71	2.88	0.69	1.7	2.08	1.48	2.17	26.16	1.83
TRINITY_DN42369_c0_g2	K00766	EC:2.4.2.18	-2.46757	down	PAT1	anthranilate phosphoribosyltransferase, chloroplastic-like isoform X1 [Hevea brasiliensis]	2.48	2.48	1.21	1.33	3.16	2.54	11.6	8.7	13.01	20.79	18.27	21.8	2.2	15.69
TRINITY_DN42371_c0_g5	K03965	-	-1.59651	down	CIB22	hypothetical protein MANES_11G081900 [Manihot esculenta]	40.27	30.33	25.58	25	46.78	34.54	135.11	127.11	152.52	132.5	136.29	129.31	33.75	135.47
TRINITY_DN42377_c1_g6	K05658	EC:3.6.3.44	6.59365	up	ABCB11	ABC transporter B family member 19-like [Hevea brasiliensis]	27.28	0.17	0.26	0.2	0.23	0.26	0	0.05	0.09	0.09	0.11	0.05	4.73	0.07
TRINITY_DN42384_c0_g1	K12893	-	1.30096	up	RS41	serine/arginine-rich splicing factor RS40 isoform X1 [Sesamum indicum]	0.24	0.23	0.43	0.62	0.29	0.37	0.21	0.23	0.18	0.03	0.22	0.46	0.36	0.22
TRINITY_DN42387_c1_g4	K14486	-	1.02884	up	ARF2	auxin response factor 2A-like [Manihot esculenta]	50.81	90.1	22.32	81.91	42.98	51.11	31.9	37	36.6	29.46	47.05	27.53	56.54	34.92
TRINITY_DN42388_c1_g8	K01051	EC:3.1.1.11	-4.35405	down	-	21 kDa protein-like isoform X1 [Hevea brasiliensis]	0.96	0.79	3.13	0.61	3.95	1.62	54.78	52.55	20.49	106.97	17.52	58.66	1.84	51.83
TRINITY_DN42395_c1_g3	K01593	EC:4.1.1.28 4.1.1.105	-1.1072	down	-	Uncharacterized protein TCM_041702 isoform 1 [Theobroma cacao]	0.87	2.02	0.88	0.96	1.84	0.63	4.21	3.3	3.62	2.91	2.12	3.26	1.2	3.24
TRINITY_DN42397_c1_g1	K13675	EC:2.4.1.-	2.36083	up	-	uncharacterized protein LOC110647829 [Hevea brasiliensis]	3.2	2.62	2.78	2.37	7.76	2.84	0.45	0.61	1.56	0.64	0.88	1.27	3.6	0.9
TRINITY_DN42403_c0_g1	K01583	EC:4.1.1.19	3.96253	up	-	arginine decarboxylase, partial [Erythroxylum coca]	267.66	179.28	382.05	173.93	126.77	198.19	8.25	8.91	20.04	23.93	26.94	26.06	221.31	19.02
TRINITY_DN42409_c0_g2	K01875	EC:6.1.1.11	-2.6909	down	OVA7	serine--tRNA ligase, chloroplastic/mitochondrial-like isoform X2 [Hevea brasiliensis]	0.71	1.29	1.02	0.86	1.91	1.08	11.25	9.7	9.01	7.94	8.9	9.99	1.15	9.46
TRINITY_DN42419_c0_g1	K14506	EC:6.3.2.52	-1.42208	down	JAR1	jasmonic acid-amido synthetase JAR1 [Populus trichocarpa]	4.63	5.46	2.45	2.32	2.12	2.19	8.66	11.43	11.12	5.66	16.49	12.08	3.2	10.91
TRINITY_DN42424_c0_g1	K02906	-	-2.39709	down	RPL3	50S ribosomal protein L3, chloroplastic [Jatropha curcas]	9.11	9.85	10.24	11.42	46.85	23.73	130.79	120.37	135.81	145.58	86.57	144.21	18.53	127.22
TRINITY_DN42431_c2_g1	K14411	-	2.07849	up	RNP1	heterogeneous nuclear ribonucleoprotein 1-like [Sesamum indicum]	0.28	0.42	0.32	0.65	0.37	0.36	0.08	0.1	0	0.05	0.2	0.32	0.4	0.12
TRINITY_DN42434_c0_g1	K11778	EC:2.5.1.87	-1.71424	down	-	dehydrodolichyl diphosphate synthase complex subunit NUS1 [Populus trichocarpa]	4.71	5.29	3.74	4.24	2.87	3.55	16.22	16.41	21.17	17.41	19.89	15.52	4.07	17.77
TRINITY_DN42438_c1_g1	K06236	-	-1.10797	down	-	uncharacterized protein LOC7454018 [Populus trichocarpa]	2.1	4.64	1.87	2	3.04	2.18	6.58	8.36	6.04	8.7	7.25	6.2	2.64	7.19
TRINITY_DN42439_c0_g1	K03860	-	-1.88083	down	GASA6	gibberellin-regulated protein 6 [Prunus persica]	1.67	1.37	40.75	8.29	31.99	38.58	87.17	40.2	78.95	267.9	11.07	92.72	20.44	96.33
TRINITY_DN42461_c2_g2	K14494	-	2.06626	up	RGL1	DELLA protein RGL1-like [Hevea brasiliensis]	0.05	0.12	0.43	0.42	0.32	0.22	0.07	0.07	0.05	0.19	0.07	0.33	0.26	0.13
TRINITY_DN42466_c1_g1	K16055	EC:2.4.1.15 3.1.3.12	4.24955	up	TPS9	probable alpha,alpha-trehalose-phosphate synthase [UDP-forming] 11 [Jatropha curcas]	55.42	19.97	52.87	23.71	5.57	38.05	1.01	1.87	2.86	2.1	3.85	1.85	32.6	2.26
TRINITY_DN42470_c0_g1	K17839	EC:1.5.3.17 1.5.3.-	1.30602	up	-	probable polyamine oxidase 2 [Manihot esculenta]	150.46	162.99	79.65	107.88	118.89	135.61	79.27	91.27	50.89	60.8	43.81	74.24	125.91	66.71
TRINITY_DN42481_c1_g1	K03070	-	1.98363	up	SECA1	protein translocase subunit SecA, chloroplastic isoform X1 [Sesamum indicum]	0.13	0.16	0.26	0.3	0.3	0.34	0.1	0.06	0.06	0.05	0.1	0.19	0.25	0.09
TRINITY_DN42501_c0_g5	K15728	EC:3.1.3.4	2.12271	up	PAH2	PREDICTED: phosphatidate phosphatase PAH2-like [Nelumbo nucifera]	10.36	18.56	21.48	15.88	21	14.58	4.3	6.9	6.64	6.09	8.05	5.26	16.98	6.21
TRINITY_DN42514_c1_g1	K14454	EC:2.6.1.1	-1.65504	down	ASP3	aspartate aminotransferase, cytoplasmic-like [Hevea brasiliensis]	8.42	13.41	8.83	7.49	8.13	8.33	29.07	34.9	28.38	39.49	31.95	35.27	9.1	33.18
TRINITY_DN42525_c4_g2	K13493	EC:2.4.1.-	-1.89611	down	UGT76E2	UDP-glycosyltransferase 76E2 [Populus trichocarpa]	0.96	4.46	0.35	0.45	1.18	0.45	5.98	8.05	5.17	6.46	4.13	5.01	1.31	5.8
TRINITY_DN42530_c1_g4	K14190	EC:2.7.7.69	-2.46454	down	-	GDP-L-galactose phosphorylase 1-like [Hevea brasiliensis]	1.49	0.93	0.46	0.88	0.46	0.61	6.88	6.69	5.32	6.48	5.7	4.07	0.81	5.86
TRINITY_DN42538_c1_g3	K03118	-	-2.92512	down	TATC	sec-independent protein translocase protein TATC, chloroplastic-like isoform X2 [Manihot esculenta]	9.98	18.36	4.91	12.89	16.01	13.73	137.92	139.36	104.89	119.13	102.66	121.77	12.65	120.95
TRINITY_DN42558_c1_g1	K06215	EC:4.3.3.6	4.84309	up	PDX1	-	8	12.84	5.33	8.17	6.69	10.42	0.25	0.33	0.41	0.55	0	0.71	8.58	0.38
TRINITY_DN42559_c0_g1	K01184	EC:3.2.1.15	-1.02695	down	GSVIVT00026920001	probable polygalacturonase [Ricinus communis]	2.12	1.89	2.68	0.95	9.11	5.9	6.88	7.64	9.22	15.8	9.64	10.17	3.77	9.89
TRINITY_DN42567_c1_g4	K02265	-	1.77418	up	COX5B-1	hypothetical protein LR48_Vigan406s012700 [Vigna angularis]	5.88	9.6	3.63	5.11	6.13	6.34	1.61	2.18	2.07	2.59	2.62	2.66	6.11	2.29
TRINITY_DN42567_c2_g3	K03239	-	3.12984	up	At5g41590	protein LURP-one-related 17 [Populus trichocarpa]	133.95	164.41	97.3	206.88	159.38	163.62	16.67	24.19	32.16	26.12	21.14	17.41	154.26	22.95
TRINITY_DN42588_c0_g1	K13719	EC:3.1.2.-	-1.45227	down	yod1	Ovarian tumor, otubain [Corchorus capsularis]	5.98	9.35	3.82	5.71	6.46	7.45	20.59	21.16	19.1	25.04	23.15	27.13	6.46	22.69
TRINITY_DN42594_c0_g2	K01602	EC:4.1.1.39	11.7924	up	RBCS-8B	ribulose-1,5-bisphosphate carboxylase/oxygenase small chain (Rubisco) [Nicotiana benthamiana]	0	0	143.71	0	84.8	0	0	0	0	0	0	0	38.09	0
TRINITY_DN42602_c1_g1	K08505	-	1.46542	up	At4g14600	uncharacterized protein LOC110634161 isoform X1 [Hevea brasiliensis]	34.04	49.7	12.97	43.19	17.2	30.72	20.02	13.1	15.32	17.26	13.19	12.36	31.3	15.21
TRINITY_DN42609_c0_g1	K14007	-	2.85304	up	At3g07100	protein transport protein Sec24-like At3g07100 [Hevea brasiliensis]	10.28	17.16	13.98	7.5	15.07	7.1	1.78	1.91	0	1.97	2.58	4.18	11.85	2.07
TRINITY_DN42613_c0_g5	K13448	-	3.86433	up	CML3	PREDICTED: calmodulin-like protein 3 [Populus euphratica]	1.25	0.81	2.68	1.25	1.58	0.85	0	0.37	0	0.1	0.2	0.05	1.4	0.12
TRINITY_DN42636_c3_g2	K10666	EC:2.3.2.27	-3.62867	down	RMA2	uncharacterized protein LOC110644264 [Hevea brasiliensis]	0.18	0.29	0.11	0.3	0.27	0.41	5.32	4.81	3.87	3.57	2.47	3.62	0.26	3.94
TRINITY_DN42638_c0_g1	K03514	EC:2.7.7.19	-2.80276	down	-	uncharacterized protein LOC8260858 isoform X2 [Ricinus communis]	8.09	4.65	2.35	1.38	1.42	2.59	17.72	19.11	10.84	14.72	17.28	11.06	3.41	15.12
TRINITY_DN42640_c0_g6	K18081	EC:3.1.3.64 3.1.3.95	2.46887	up	-	uncharacterized protein LOC111310626 [Durio zibethinus]	27.05	5.04	12.14	6.53	10.07	12.13	0.05	0.12	2.58	3.15	8.82	2.75	12.16	2.91
TRINITY_DN42642_c2_g1	K14498	EC:2.7.11.1	-1.39634	down	SAPK2	serine/threonine-protein kinase SAPK2 [Ziziphus jujuba]	11.07	7.94	9.56	7.83	9.36	7.26	32.54	34.29	28.03	28.62	30.17	28.42	8.84	30.34
TRINITY_DN42646_c0_g4	K12599	EC:3.6.4.-	-1.55327	down	SKI2	DExH-box ATP-dependent RNA helicase DExH11 isoform X1 [Hevea brasiliensis]	0.55	2.46	1.38	1.69	1.15	0.7	4.81	4	4.91	6.96	5.09	4.95	1.32	5.12
TRINITY_DN42653_c1_g3	K02693	-	-1.5042	down	PSAEA	PREDICTED: photosystem I reaction center subunit IV A, chloroplastic-like [Populus euphratica]	271.89	375.22	383.58	514.69	579.31	459.09	2153.34	1737.01	1605.06	1667.78	1136.4	1441.94	430.63	1623.59
TRINITY_DN42653_c1_g5	K02693	-	-1.54871	down	PSAE2	photosystem I reaction center subunit IV A, chloroplastic-like [Manihot esculenta]	7.35	8.44	14.66	11.2	27.37	23.83	82.02	61.42	72.8	67.3	39.66	51.31	15.47	62.42
TRINITY_DN42654_c0_g2	K03283	-	2.78118	up	HSP70	heat shock cognate 70 kDa protein 2-like [Lactuca sativa]	620.77	559.41	833.16	1049.57	822.93	516.33	12.11	51.61	197.85	183.2	244.64	210.82	733.7	150.04
TRINITY_DN42655_c0_g1	K09555	-	-1.31272	down	BAG1	BAG family molecular chaperone regulator 1-like [Hevea brasiliensis]	0.98	0.73	1.24	0.7	2.82	1	2.9	6.24	3.39	6.87	1.33	3.54	1.25	4.05
TRINITY_DN42659_c1_g16	K03955	-	-2.32869	down	MTACP2	acyl carrier protein 3, mitochondrial [Populus trichocarpa]	16.02	26.6	9.75	16.24	19.32	15.53	121.6	107.02	113.97	100.76	96.88	120.95	17.24	110.2
TRINITY_DN42659_c1_g2	K03955	-	-1.83568	down	MTACP2	acyl carrier protein 3, mitochondrial [Populus trichocarpa]	4.31	13.57	11.11	13.33	5.17	5.73	39.47	27.09	31.1	31.01	37.15	31.86	8.87	32.95
TRINITY_DN42662_c0_g1	K06965	-	6.61587	up	PEL1	PREDICTED: protein PELOTA 1 [Theobroma cacao]	2.92	4.08	6.59	4.91	2.75	3.74	0.1	0	0	0.12	0.06	0.03	4.17	0.05
TRINITY_DN42665_c0_g2	K00033	EC:1.1.1.44 1.1.1.343	1.35395	up	At3g02360	6-phosphogluconate dehydrogenase, decarboxylating 3 [Sesamum indicum]	19.72	18.56	19.02	20.8	27.33	15.09	8	10.62	10.25	11.68	8.92	9.86	20.09	9.89
TRINITY_DN42667_c1_g3	K06688	EC:2.3.2.23	2.93088	up	UBC20	ubiquitin-conjugating enzyme E2 20-like [Manihot esculenta]	9.07	6.63	8.18	7.26	9.22	8.29	0.68	2.18	1.16	1.43	0.91	2.01	8.11	1.4
TRINITY_DN42674_c0_g5	K01535	EC:3.6.3.6	7.99297	up	AHA9	ATPase 9, plasma membrane-type [Jatropha curcas]	3.01	3.15	4.76	6.32	4.66	1.54	0	0.03	0	0.06	0	0	3.91	0.01
TRINITY_DN42678_c1_g1	K02897	-	1.54581	up	-	uncharacterized protein LOC8267240 [Ricinus communis]	45.15	50.38	19.76	45.55	34.15	35	16.27	17.53	19.38	19.31	15.59	18.52	38.33	17.77
TRINITY_DN42684_c2_g2	K05278	EC:1.14.20.6	-2.67366	down	CODM	protein SRG1-like isoform X2 [Hevea brasiliensis]	11.57	15.94	11.6	13.78	7.03	11.3	145.81	100.04	84.95	55.55	107.02	78.62	11.87	95.33
TRINITY_DN42689_c0_g1	K02949	-	1.41508	up	RPS11	40S ribosomal protein S11 [Handroanthus impetiginosus]	0.46	0.75	1.32	1.47	1.46	1.16	0.33	0.21	0.34	0.32	0.73	1.21	1.1	0.52
TRINITY_DN42689_c0_g4	K02949	-	1.49985	up	RPS11	component of cytosolic 80S ribosome and 40S small subunit [Volvox carteri f. nagariensis]	0.94	4.7	6.95	6.42	7.29	6.67	1.92	1.51	2.64	2.16	4.33	3.3	5.5	2.64
TRINITY_DN42696_c1_g2	K19891	EC:3.2.1.39	-1.24118	down	At1g32860	glucan endo-1,3-beta-glucosidase 11-like [Hevea brasiliensis]	3.92	3.02	5.81	2.71	7.02	4.33	9.19	12.24	13.01	18.13	14.41	16.34	4.47	13.89
TRINITY_DN42705_c0_g1	K05755	-	1.89176	up	ARPC4	uncharacterized LOC100527736 [Glycine max]	26.27	39.28	19.19	32.56	20.5	26.8	8.77	11.37	11.77	9.38	8.41	8.88	27.43	9.76
TRINITY_DN42713_c0_g3	K00232	EC:1.3.3.6	-1.7949	down	ACX4	PREDICTED: acyl-coenzyme A oxidase 4, peroxisomal isoform X1 [Juglans regia]	20.34	27.6	20.81	25.98	26.2	19.56	104.36	109.9	110.31	109.83	98.78	101.88	23.42	105.84
TRINITY_DN42736_c0_g1	K13447	EC:1.6.3.- 1.11.1.-	1.89344	up	RBOHB	respiratory burst oxidase homolog protein B [Hevea brasiliensis]	21.84	11.19	140.83	29.47	10.78	30.68	4.96	5.66	23.3	16.18	23.06	19.91	40.8	15.51
TRINITY_DN42742_c3_g12	K13424	-	-3.39742	down	WRKY13	probable WRKY transcription factor 13 [Manihot esculenta]	0.07	0.14	0.07	0	0.32	0	1.41	0.42	0.82	3.03	1.84	1.4	0.1	1.49
TRINITY_DN42746_c0_g1	K00262	EC:1.4.1.4	-2.62912	down	-	hypothetical protein CISIN_1g006655mg [Citrus sinensis]	1.44	2.35	3.13	1.18	2.07	3.03	14.13	14.44	15.82	15.55	15.49	15.59	2.2	15.17
TRINITY_DN42753_c0_g1	K06013	EC:3.4.24.84	-2.16158	down	FACE1	Peptidase_M48 domain-containing protein [Cephalotus follicularis]	0.05	6.62	2.93	2.6	3.49	1.66	4.99	4.69	7.38	6.25	4.89	1.92	2.89	5.02
TRINITY_DN42755_c1_g12	K00600	EC:2.1.2.1	1.46147	up	SHM7	serine hydroxymethyltransferase 7-like [Manihot esculenta]	13.64	65.73	3.16	28.4	4.53	28.21	10.92	15.63	9.69	11.49	7.2	8.32	23.95	10.54
TRINITY_DN42757_c0_g1	K03029	-	-3.04114	down	-	uncharacterized protein LOC110663187 [Hevea brasiliensis]	1.23	0.42	0.76	0.83	0.72	0.76	9.53	8.58	9.89	15.6	5.76	5.98	0.79	9.22
TRINITY_DN42757_c2_g3	K03029	-	1.85222	up	-	uncharacterized protein LOC105173250 [Sesamum indicum]	0.28	0.18	0.44	0.44	0.35	0.38	0.07	0.15	0.05	0.05	0.16	0.25	0.34	0.12
TRINITY_DN42767_c0_g1	K00679	EC:2.3.1.158	1.93468	up	At2g04570	GDSL esterase/lipase At2g04570 [Ricinus communis]	283.67	191.06	180.51	108.2	390.08	255.06	61.18	100.86	62.5	88.79	70	94.9	234.76	79.7
TRINITY_DN42776_c1_g2	K02115	-	7.44147	up	-	uncharacterized protein LOC105634406 [Jatropha curcas]	0.85	0.29	4.13	1.2	0.59	0.35	0	0	0	0	0	0	1.23	0
TRINITY_DN42776_c1_g3	K02115	-	10.147	up	-	uncharacterized protein LOC105634406 [Jatropha curcas]	9.58	3.24	34.04	10.5	10.06	7.9	0.07	0	0	0	0	0	12.55	0.01
TRINITY_DN42782_c0_g1	K02150	-	2.03865	up	VHA-E2	V-type proton ATPase subunit E2 [Populus trichocarpa]	2.32	3	3.6	1.66	9.68	6.42	1.26	2.21	0.77	1.29	1.72	1.18	4.45	1.41
TRINITY_DN42784_c2_g5	K07937	-	2.3445	up	ARF1	hypothetical protein Ahy_B09g096084 isoform D [Arachis hypogaea]	4.18	2.84	4.13	3.33	3.85	3.71	0.73	0.31	1.21	1.07	1.01	1.38	3.67	0.95
TRINITY_DN42788_c0_g3	K01595	EC:4.1.1.31	1.43209	up	PPC4	phosphoenolpyruvate carboxylase 4 [Sesamum indicum]	0.19	0.12	0.27	0.27	0.25	0.37	0.15	0.09	0.05	0.03	0.13	0.3	0.25	0.12
TRINITY_DN42789_c1_g4	K02929	-	1.07857	up	RPL44	unnamed protein product, partial [Vitis vinifera]	14.37	18.16	7.63	10.5	20.52	14.27	8.01	7.7	9.44	8.53	9.43	10.03	14.24	8.86
TRINITY_DN42796_c3_g1	K08495	-	-1.71737	down	GOS12	golgi snare 12 [Arabidopsis thaliana]	4.54	7.58	6.33	5.83	5.06	6.93	27.69	21.54	21	21.78	18.01	19.06	6.04	21.51
TRINITY_DN42797_c3_g3	K00801	EC:2.5.1.21	-1.32129	down	SQS1	squalene synthase [Bruguiera gymnorhiza]	21.52	38.36	20.12	36.76	21.45	18.38	99.67	98.32	64.19	67.51	99.88	69.99	26.1	83.26
TRINITY_DN42799_c0_g1	K08246	EC:5.5.1.9	-1.36997	down	CPI1	cycloeucalenol cycloisomerase isoform X2 [Jatropha curcas]	8.3	11.41	12.76	7.11	18.34	8.98	29.1	36.17	38.97	45.02	30.83	41.81	11.15	36.98
TRINITY_DN42807_c0_g8	K13258	EC:4.2.1.105	3.60926	up	HIDM	PREDICTED: 2-hydroxyisoflavanone dehydratase-like [Pyrus x bretschneideri]	8.51	3.49	5.28	1.46	3.43	3.38	0.29	0.16	0.6	0.31	0.41	0.61	4.26	0.4
TRINITY_DN42817_c0_g6	K03860	-	3.7322	up	GASA4	Gibberellin-regulated protein [Actinidia chinensis var. chinensis]	1.15	2.98	3.07	0.99	3.61	4.38	0	0	0.77	0.37	0.19	0.19	2.7	0.25
TRINITY_DN42817_c0_g7	K05666	-	-1.78014	down	ABCC3	ABC transporter C family member 3-like [Hevea brasiliensis]	0.84	1.25	0.5	1.04	0.41	0.57	2.83	4.39	2.15	2.76	3.09	1.74	0.77	2.83
TRINITY_DN42835_c2_g2	K03781	EC:1.11.1.6	-1.07541	down	CAT1	PREDICTED: catalase isozyme 1 [Gossypium raimondii]	2157.24	1533.25	1013.07	1396.5	645.44	1073.14	4701.55	3321.66	3570.4	2707.5	4034.31	2484.83	1303.11	3470.04
TRINITY_DN42843_c0_g10	K13832	EC:4.2.1.10 1.1.1.25	1.15421	up	EMB3004	bifunctional 3-dehydroquinate dehydratase/shikimate dehydrogenase, chloroplastic [Jatropha curcas]	16.55	20.38	15.15	12.73	19.96	22.56	9.36	7.84	12.32	10.07	13.22	11.65	17.89	10.74
TRINITY_DN42848_c0_g1	K09839	EC:1.23.5.1	-2.90296	down	VDE1	violaxanthin de-epoxidase, chloroplastic isoform X1 [Manihot esculenta]	2.92	7.58	4.18	3.94	9.17	6.31	61.9	62.03	55.44	53.38	36.65	53.79	5.68	53.87
TRINITY_DN42851_c2_g3	K02154	-	1.35031	up	VHA-a1	V-type proton ATPase subunit a1 [Manihot esculenta]	6.44	18.53	17.67	22.12	12.85	12.84	4.61	5.73	7.29	7.63	9.75	10.05	15.08	7.51
TRINITY_DN42852_c1_g11	K12581	-	6.96457	up	CAF1-1	putative CCR4-associated factor 1 homolog 8 [Hevea brasiliensis]	2.13	3.31	6.99	5.74	5.65	1.79	0.1	0	0.09	0.04	0	0	4.27	0.04
TRINITY_DN42854_c0_g1	K11752	EC:3.5.4.26 1.1.1.193	-3.83765	down	PYRD	riboflavin biosynthesis protein PYRD, chloroplastic [Jatropha curcas]	0.31	0.28	0.03	0.3	0.23	0.35	3.53	4.16	5.24	4.8	4.75	5.67	0.25	4.69
TRINITY_DN42873_c1_g1	K01889	EC:6.1.1.20	-1.99163	down	At3g58140	PREDICTED: phenylalanine--tRNA ligase, chloroplastic/mitochondrial [Populus euphratica]	1.96	1.02	0.69	2.49	4.56	1.38	11.05	9.46	7.8	7.62	6.66	7.64	2.02	8.37
TRINITY_DN42882_c1_g2	K00927	EC:2.7.2.3	1.08548	up	-	phosphoglycerate kinase, cytosolic [Abrus precatorius]	65.08	64.88	30.26	49.56	49.79	41.03	21.66	25.12	34.55	32.5	38.05	32.05	50.1	30.66
TRINITY_DN42898_c4_g3	K10712	EC:1.13.11.19	9.64071	up	PCO1	hypothetical protein CDL15_Pgr006281 [Punica granatum]	2.74	0.16	18.25	0.98	1.3	1.49	0	0	0.03	0	0	0	4.15	0.01
TRINITY_DN42911_c0_g1	K13434	-	8.06634	up	CRF4	ethylene responsive factor [Bruguiera gymnorhiza]	70.35	52.89	75.5	88.95	77.41	81.54	0.37	0.18	0.06	0.71	0.44	0.57	74.44	0.39
TRINITY_DN42913_c1_g1	K01759	EC:4.4.1.5	-1.43109	down	At1g67280	probable lactoylglutathione lyase, chloroplastic [Populus trichocarpa]	23.66	19.77	13.41	30.29	40.45	23.93	111.7	96	91	78.26	95.72	78	25.25	91.78
TRINITY_DN42923_c0_g7	K12127	-	1.72039	up	APRR1	two-component response regulator-like APRR1 [Manihot esculenta]	65.3	78.53	34.17	53.09	59.19	52.04	20.88	29.41	17.37	22.98	16.16	16.8	57.05	20.6
TRINITY_DN42931_c3_g1	K03363	-	3.18754	up	-	uncharacterized protein LOC110641587 [Hevea brasiliensis]	22.36	27.6	14.83	6.97	6.64	8.51	0.11	0.75	0.75	0.15	0.73	0	14.49	0.41
TRINITY_DN42932_c0_g2	K02731	EC:3.4.25.1	-1.64147	down	PAD1	proteasome subunit alpha type-7-like [Manihot esculenta]	9.85	12.03	3.88	6.49	8.33	8.27	30.83	28.11	32.69	35.94	35.9	33.75	8.14	32.87
TRINITY_DN42936_c0_g1	K10604	EC:2.3.2.27	1.40179	up	LOG2	probable E3 ubiquitin-protein ligase LOG2, partial [Hevea brasiliensis]	4.92	2.14	20.94	2.69	3.8	10.08	0.53	0.78	5.57	2.02	3.82	4.04	7.43	2.79
TRINITY_DN42937_c0_g1	K13366	EC:1.5.3.14 1.5.3.16 1.5.3.-	5.53118	up	PAO1	polyamine oxidase 1-like isoform X4 [Hevea brasiliensis]	105.6	36.33	182.32	88.4	54.72	89.24	1.72	2.11	2.82	0.73	5.63	3.25	92.77	2.71
TRINITY_DN42937_c0_g12	K13366	EC:1.5.3.14 1.5.3.16 1.5.3.-	5.736	up	PAO1	Polyamine oxidase 1 isoform 1 [Theobroma cacao]	130.31	40.67	175.46	85.7	57.96	129.93	2.02	1.98	3.87	1.82	2.91	1.84	103.34	2.41
TRINITY_DN42937_c0_g16	K13366	EC:1.5.3.14 1.5.3.16 1.5.3.-	6.70218	up	PAO1	hypothetical protein B456_004G067000 [Gossypium raimondii]	4.82	1.15	3.93	2.34	1.14	3.99	0	0.12	0	0	0	0	2.9	0.02
TRINITY_DN42942_c0_g3	K13412	EC:2.7.11.1	-1.77819	down	CPK1	hypothetical protein CICLE_v10014759mg [Citrus clementina]	11.5	13.16	8.82	7.51	10.14	11.22	29.55	32.63	59.91	40.83	58.31	58.35	10.39	46.6
TRINITY_DN42944_c0_g1	K14494	-	-1.31698	down	SCL4	scarecrow-like protein 4 [Hevea brasiliensis]	4.17	3.16	7.93	3.86	7.92	7.43	7.21	10.42	16.05	30.16	13.88	25.36	5.75	17.18
TRINITY_DN42957_c3_g3	K19476	-	-3.04766	down	-	uncharacterized protein LOC105637705 [Jatropha curcas]	5.17	2.13	0.83	1.9	1.13	1.2	28.29	34.96	15.62	14.08	16.76	21.05	2.06	21.79
TRINITY_DN42958_c0_g2	K01883	EC:6.1.1.16	-1.83938	down	SYCO	cysteine--tRNA ligase, chloroplastic/mitochondrial isoform X2 [Populus trichocarpa]	3.89	5.6	1.87	2.95	3.31	3.5	19.3	19.43	13.88	18.36	11.83	12.5	3.52	15.88
TRINITY_DN42960_c0_g6	K10615	EC:2.3.2.26	1.05828	up	HERC1	E3 ubiquitin-protein ligase HERC2-like isoform X1 [Hevea brasiliensis]	17.39	19.27	12.35	12.04	22.79	17.85	10.96	13.43	9.73	13.36	7.9	7.45	16.95	10.47
TRINITY_DN42967_c0_g1	K01535	EC:3.6.3.6	6.69622	up	PMA4	PREDICTED: plasma membrane ATPase 4-like isoform X2 [Elaeis guineensis]	4.54	2.43	18.45	3.01	5.1	3.82	0	0	0.37	0.48	0	0	6.23	0.14
TRINITY_DN42968_c0_g2	K12947	EC:3.4.-.-	-1.11653	down	At2g39960	PREDICTED: probable signal peptidase complex subunit 2 [Theobroma cacao]	16.27	21.98	14.12	17.52	20.45	13.28	32.78	51.68	45.38	54.55	64.16	49.98	17.27	49.75
TRINITY_DN42969_c1_g2	K08506	-	2.99275	up	SYP71	SNARE domain-containing protein [Cephalotus follicularis]	0.13	0.82	2.26	0.42	1.11	0.2	0.14	0	0.26	0.06	0.13	0.19	0.82	0.13
TRINITY_DN42972_c2_g8	K14488	-	4.19808	up	SAUR72	auxin-responsive protein SAUR72 [Jatropha curcas]	8.06	11.41	5.1	9.85	11.88	6.8	0.55	0.83	0.61	0.71	0.57	0.36	8.85	0.6
TRINITY_DN42976_c0_g1	K02899	-	-1.00975	down	rpmA	uncharacterized protein LOC113732081 [Coffea arabica]	10.32	12.15	5.62	10.37	9.22	9.5	22.19	26.79	28.5	23.07	23.63	23.77	9.53	24.66
TRINITY_DN42976_c0_g2	K02899	-	-1.77409	down	rpmA	PREDICTED: uncharacterized protein LOC104118258 [Nicotiana tomentosiformis]	4.62	5.01	4.35	3.13	9.33	5.69	26.11	20.87	27.02	25.73	22.93	22.03	5.35	24.11
TRINITY_DN42980_c0_g2	K13525	-	1.0111	up	CDC48	cell division cycle protein 48 homolog [Arachis duranensis]	125.09	140.63	88.74	131.03	121.88	154.21	69.15	77.14	77.61	90.33	63.63	68.21	126.93	74.34
TRINITY_DN42985_c1_g1	K10260	-	7.98462	up	PUB21	U-box domain-containing protein 21-like [Hevea brasiliensis]	49.99	8.54	93.04	15.88	12.34	20.19	0.26	0.1	0.19	0.21	0.21	0.13	33.33	0.18
TRINITY_DN43014_c2_g3	K01188	EC:3.2.1.21	1.08721	up	BGLU11	Glycoside hydrolase [Parasponia andersonii]	5.94	15.4	1.3	7.15	13.93	9.08	3.75	7.08	5.77	3.6	6.26	5.32	8.8	5.3
TRINITY_DN43018_c2_g3	K16225	-	-1.7959	down	WRKY46	WRKY family protein [Populus trichocarpa]	26.69	8.71	10.89	5.58	27.26	16.5	0.58	1.46	103.97	36.98	146.79	170.34	15.94	76.69
TRINITY_DN43020_c3_g2	K09840	EC:1.13.11.51	2.04048	up	CCD4	probable carotenoid cleavage dioxygenase 4, chloroplastic [Sesamum indicum]	0.2	0.21	0.43	0.45	0.37	0.28	0.09	0.1	0	0.02	0.24	0.16	0.32	0.1
TRINITY_DN43022_c2_g2	K14495	-	-1.30672	down	GID2	F-box protein GID2 [Jatropha curcas]	2.13	5.72	0.91	2.92	4.12	2.14	15.62	17.92	3.44	11.27	2.84	3.6	2.99	9.12
TRINITY_DN43038_c0_g6	K22794	EC:2.4.1.239 2.4.1.-	2.2716	up	FG3	PREDICTED: anthocyanidin 3-O-glucoside 2''-O-glucosyltransferase-like [Populus euphratica]	2.7	4.71	1.63	2.75	1.2	2.39	0.4	1.1	0.96	0.61	0.25	0.68	2.56	0.67
TRINITY_DN43044_c1_g2	K00021	EC:1.1.1.34	3.77813	up	HMG1	3-hydroxy-3-methylglutaryl-coenzyme A reductase 1-like [Durio zibethinus]	71.35	66.79	53.07	63.51	40.63	67.46	5.71	5.55	5.16	6.2	4.89	6.8	60.47	5.72
TRINITY_DN43050_c0_g1	K03514	EC:2.7.7.19	-1.44173	down	-	hypothetical protein MANES_07G140200 [Manihot esculenta]	2.87	3.2	2.66	2.56	1.21	2.04	9.66	10.55	6.24	9.27	8.14	6.67	2.42	8.42
TRINITY_DN43063_c0_g4	K04564	EC:1.15.1.1	2.04682	up	FSD2	Manganese superoxide dismutase [Handroanthus impetiginosus]	0.32	0.83	0.79	0.51	0.81	0.78	0.19	0.09	0.14	0.06	0.38	0.37	0.67	0.2
TRINITY_DN43079_c0_g2	K22133	EC:6.2.1.8	1.51358	up	AAE3	unnamed protein product, partial [Vitis vinifera]	6.38	11.51	4.09	7.63	4.12	11.71	3.21	3	2.87	2.24	5.15	3.57	7.57	3.34
TRINITY_DN43080_c2_g3	K01365	EC:3.4.22.15	1.81955	up	Os04g0650000	low-temperature-induced cysteine proteinase [Sesamum indicum]	0.9	1.01	0.97	1.56	1.17	0.94	0.19	0.59	0.15	0.27	0.43	0.68	1.09	0.39
TRINITY_DN43085_c0_g1	K11584	-	1.33187	up	At3g13620	probable polyamine transporter At3g13620 [Populus trichocarpa]	3.3	3.7	4.22	2.11	3.3	4.12	2.04	1.88	1.09	2.51	1.56	1.58	3.46	1.78
TRINITY_DN43085_c0_g2	K11584	-	5.55018	up	At3g13620	probable polyamine transporter At3g13620 [Ricinus communis]	34.22	39.54	33.56	32.81	26.94	56.39	0.51	0.48	0.86	0.25	1.45	2.63	37.24	1.03
TRINITY_DN43092_c0_g1	K14593	EC:5.3.99.8	-1.39297	down	CCS	capsanthin/capsorubin synthase, chromoplastic [Ricinus communis]	0.2	0.79	0.45	0.34	0.94	0.66	2.21	1.28	1.95	2.98	0.58	2.33	0.56	1.89
TRINITY_DN43093_c0_g5	K02920	-	1.32185	up	RPL36A	60S ribosomal protein L36 [Capsicum annuum]	188.73	225.33	140.46	199.34	154.41	161.27	87.56	80.32	103.53	91.82	99.88	91.2	178.26	92.38
TRINITY_DN43108_c0_g1	K02885	-	-2.70319	down	RPD1	PREDICTED: protein ROOT PRIMORDIUM DEFECTIVE 1-like [Pyrus x bretschneideri]	0.22	0.61	0.18	0.64	0.28	0.26	3.85	3.33	2.82	3.15	1.9	3.11	0.36	3.03
TRINITY_DN43109_c0_g2	K03094	-	-3.55202	down	ASK21	SKP1-like protein 21 isoform X1 [Ricinus communis]	0.85	1	1.85	0.75	1.06	0.93	18.16	15.14	12.16	15.31	12.51	13.33	1.07	14.44
TRINITY_DN43116_c2_g4	K00083	EC:1.1.1.195	1.6196	up	CAD	Alcohol dehydrogenase, class V [Handroanthus impetiginosus]	0.21	0.52	0.73	0.72	0.49	0.66	0.2	0.23	0.08	0.08	0.46	0.35	0.56	0.23
TRINITY_DN43117_c0_g4	K12859	-	-1.39664	down	YLS8	hypothetical protein Ahy_B04g071666 [Arachis hypogaea]	23.85	34.3	17.91	25.28	22	26.42	105.05	92.96	78.81	81.64	86.96	76.03	24.96	86.91
TRINITY_DN43119_c2_g3	K14494	-	-1.34443	down	GAI	DELLA protein GAI [Hevea brasiliensis]	1.8	3	7.46	3.49	3.93	2.34	8.54	10.82	16.23	17.63	6.95	14.79	3.67	12.49
TRINITY_DN43130_c1_g1	K00942	EC:2.7.4.8	3.21938	up	GK-2	guanylate kinase 1 [Arabidopsis thaliana]	49.59	55.28	33.15	42.71	46.78	42.69	3.39	5.28	7.21	4	9.93	10.66	45.03	6.75
TRINITY_DN43133_c1_g1	K02966	-	1.41808	up	RPS19A	-	57.21	67.23	25.72	63.91	70.38	65.7	23.46	25.2	35.94	33.03	26.44	32.03	58.36	29.35
TRINITY_DN43133_c3_g1	K10745	-	-2.61728	down	-	MLP-like protein 43 [Quercus suber]	0.75	0.76	1.28	0.59	1.72	2.46	14.64	18.23	7.05	11.94	7.58	8.19	1.26	11.27
TRINITY_DN43133_c4_g8	K13447	EC:1.6.3.- 1.11.1.-	6.13906	up	RBOHD	respiratory burst oxidase homolog protein D [Carica papaya]	1.93	0.5	6.41	0.83	1.89	2.94	0	0	0	0.15	0	0	2.42	0.02
TRINITY_DN43138_c1_g1	K06689	EC:2.3.2.23	2.96808	up	UBC11	hypothetical protein B456_007G014500 [Gossypium raimondii]	119.46	161.97	134.27	146.93	164.83	199.16	12.44	26.58	32.33	49.26	24.58	40.29	154.44	30.91
TRINITY_DN43138_c1_g2	K06689	EC:2.3.2.23	3.72008	up	-	-	9.7	3.23	9.2	4.41	3.92	5.58	0.68	0.55	0.81	0.63	0.43	0.48	6.01	0.6
TRINITY_DN43138_c1_g5	K06689	EC:2.3.2.23	1.98275	up	UBC9	hypothetical protein B456_007G014500 [Gossypium raimondii]	340.55	234.76	394.89	247.77	143.78	223.74	37.34	43.23	133.98	54.82	153.3	126.51	264.25	91.53
TRINITY_DN43146_c1_g1	K07375	-	1.42841	up	TUBB2A	beta-1 tubulin [Dendrobium catenatum]	0.49	1.55	3.16	2.9	2.41	5.09	0.84	2.02	2.88	2.11	2.54	2.01	2.6	2.07
TRINITY_DN43146_c1_g2	K07375	-	-3.00873	down	-	unnamed protein product [Coffea canephora]	2.86	7.85	0.54	4.33	2.31	2.75	40.08	40.02	24.12	44.3	22.96	35.31	3.44	34.46
TRINITY_DN43146_c1_g6	K07375	-	-1.53841	down	-	unnamed protein product [Coffea canephora]	14.95	8.37	6.18	5.22	7.31	18.44	36.85	46.33	37.64	55.56	19.45	42.71	10.08	39.76
TRINITY_DN43156_c0_g1	K10661	EC:2.3.2.27	1.5456	up	SUD1	RING/U-box domain-containing protein isoform 1 [Theobroma cacao]	120	155.04	102.64	153.33	113.23	100.31	50.95	53.36	59.5	49.94	54.61	63.15	124.09	55.25
TRINITY_DN43156_c0_g3	K10661	EC:2.3.2.27	1.46893	up	SUD1	probable E3 ubiquitin ligase SUD1 isoform X1 [Jatropha curcas]	64.54	85.35	49.61	81.17	62.48	50.93	26.66	29.72	36.66	28.47	27.19	34.5	65.68	30.53
TRINITY_DN43161_c1_g1	K13424	-	-1.99123	down	WRKY51	PREDICTED: probable WRKY transcription factor 51 [Populus euphratica]	3.1	1.21	0.88	0.26	3.12	3.57	0.04	0.57	5.03	21.97	11.75	25.63	2.02	10.83
TRINITY_DN43161_c1_g13	K18835	-	-1.60094	down	WRKY51	probable WRKY transcription factor 51 [Populus trichocarpa]	42.45	35.59	57.74	41.8	46.37	48.34	23.07	38.56	376.88	84.53	231.97	352.83	45.38	184.64
TRINITY_DN43162_c2_g1	K00430	EC:1.11.1.7	1.77777	up	PER17	peroxidase 17-like [Hevea brasiliensis]	1.6	2.71	7.96	7.7	6.81	2.71	1.55	0.85	1.41	3.54	4.52	0.69	4.92	2.09
TRINITY_DN43166_c3_g1	K01728	EC:4.2.2.2	1.91547	up	At5g63180	PREDICTED: probable pectate lyase 5 [Gossypium arboreum]	2.77	1.53	1.79	0.1	4.12	1.47	0.19	0.28	1.29	0.88	0.64	0.8	1.96	0.68
TRINITY_DN43166_c3_g2	K01728	EC:4.2.2.2	-2.49384	down	At1g67750	probable pectate lyase 18 [Durio zibethinus]	0.18	0	0	0.05	0.37	0.09	0.09	1.48	0.18	1.7	1.75	2.11	0.11	1.22
TRINITY_DN43169_c3_g2	K14595	EC:2.4.1.263	-1.33655	down	UGT92A1	UDP-glycosyltransferase 92A1-like [Manihot esculenta]	7.74	13.58	1.95	7.33	8.46	9.3	10.31	13.66	24.08	30.05	38.81	37.74	8.06	25.78
TRINITY_DN43174_c0_g1	K01507	EC:3.6.1.1	1.70701	up	-	Pyrophosphate-energised proton pump [Corchorus olitorius]	12.61	18.89	8.93	15.23	18.84	16.47	4.6	4.93	6.88	7.95	6.39	5.46	15.16	6.04
TRINITY_DN43176_c2_g1	K03094	-	1.37203	up	NAC078	NAC domain-containing protein 78 isoform X1 [Populus trichocarpa]	103.23	104.06	33.33	59.18	58.8	78.01	35.36	41.9	30.83	36.61	35.54	29.68	72.77	34.99
TRINITY_DN43176_c2_g5	K20769	EC:1.14.-.-	7.70393	up	CYP94A2	cytochrome P450 94A1-like [Chenopodium quinoa]	51.57	24.31	46.84	12.99	27.34	24.44	0.32	0.16	0	0.45	0	0.15	31.25	0.18
TRINITY_DN43176_c2_g7	K13407	EC:1.14.-.-	2.375	up	CYP94A2	PREDICTED: cytochrome P450 94A2-like [Nicotiana attenuata]	52.48	23.88	93.21	27.98	28.98	43.5	7.43	2.73	13.41	12.63	17.04	15.32	45	11.43
TRINITY_DN43180_c0_g7	K16055	EC:2.4.1.15 3.1.3.12	1.23818	up	TPS7	probable alpha,alpha-trehalose-phosphate synthase [UDP-forming] 7 [Cucurbita moschata]	31.99	33.81	64.41	62.71	43.07	51.41	15.35	19.27	37.02	20.16	35.34	27.18	47.9	25.72
TRINITY_DN43181_c3_g1	K06689	EC:2.3.2.23	-1.98716	down	UBC28	ubiquitin-conjugating enzyme E2 28 isoform X2 [Prunus persica]	1.57	4.1	2.08	2.29	1.08	1.74	8.96	8.5	8.15	21.32	6.82	17.21	2.14	11.83
TRINITY_DN43184_c0_g4	K18819	EC:2.4.1.123	6.14003	up	MTOPVIB	hypothetical protein CICLE_v10033458mg, partial [Citrus clementina]	1.75	1.38	7.35	3.44	1.05	3.85	0.1	0	0.17	0.04	0.03	0.05	3.14	0.06
TRINITY_DN43189_c1_g2	K09753	EC:1.2.1.44	1.96494	up	TKPR1	Flavonol reductase/cinnamoyl-CoA reductase [Handroanthus impetiginosus]	0.96	0.39	1.19	1.24	0.84	1.06	0.22	0.28	0.16	0.1	0.4	0.81	0.95	0.33
TRINITY_DN43192_c1_g9	K05278	EC:1.14.20.6	1.28556	up	At5g05600	PREDICTED: leucoanthocyanidin dioxygenase [Populus euphratica]	29.38	45.66	20.2	37.58	20.02	30.5	14.14	12.36	10.16	14.5	9.63	12.46	30.56	12.21
TRINITY_DN43202_c0_g5	K01681	EC:4.2.1.3	2.55454	up	-	aconitate hydratase, cytoplasmic-like [Abrus precatorius]	11.05	12.7	23.51	14.84	10.59	8.78	2.58	1.23	4.95	2.91	4.95	1.78	13.58	3.07
TRINITY_DN43214_c0_g1	K01426	EC:3.5.1.4	-2.02033	down	AMI1	hypothetical protein CUMW_281350 [Citrus unshiu]	9.51	5.14	7.87	9.37	16.1	6.01	28.11	31.96	42.49	35.37	35.95	36.11	9	35
TRINITY_DN43214_c0_g3	K01426	EC:3.5.1.4	-1.83309	down	AMI1	amidase 1 isoform X2 [Manihot esculenta]	24.1	20.6	21.9	21.82	25.46	24.07	125.46	146.32	112.58	93.39	69.75	74.13	22.99	103.61
TRINITY_DN43226_c1_g2	K03231	-	1.63878	up	RBP47	polyadenylate-binding protein RBP47 [Jatropha curcas]	105.97	104.73	74.99	92.3	107.28	88	38.5	41.76	46.8	37.88	30.66	39.84	95.55	39.24
TRINITY_DN43239_c0_g1	K12135	-	-3.18769	down	COL4	zinc finger protein CONSTANS-LIKE 4 [Jatropha curcas]	15.65	37.65	20.38	17.61	29.37	19.79	393.62	380.82	231.95	283.44	107.3	210.58	23.41	267.95
TRINITY_DN43239_c0_g13	K12135	-	2.45086	up	COL5	GATA-4/5/6 transcription factor [Handroanthus impetiginosus]	0.27	0.24	0.93	0.57	0.93	1.1	0.24	0.27	0	0	0.19	0.25	0.67	0.16
TRINITY_DN43239_c0_g8	K12135	-	1.97686	up	COL5	GATA-4/5/6 transcription factor [Handroanthus impetiginosus]	0.36	0.45	0.71	0.85	0.72	0.84	0.3	0.18	0	0	0.18	0.62	0.65	0.21
TRINITY_DN43257_c2_g1	K13429	-	-1.5476	down	-	vicilin-like seed storage protein At2g18540 [Carica papaya]	5.52	9.72	2.47	4.29	4.27	4.18	20.49	24.61	14.29	20.95	16.99	14.56	5.08	18.65
TRINITY_DN43274_c1_g2	K13993	-	-1.38732	down	HSP18.5-C	PREDICTED: 17.3 kDa class I heat shock protein-like [Gossypium arboreum]	0.85	2.02	0.35	1.79	1.23	1.91	2.49	5.25	4.84	4.3	5.56	5.42	1.36	4.64
TRINITY_DN43274_c1_g6	K13993	-	3.76937	up	HSP18.5-C	17.3 kDa class I heat shock protein-like [Manihot esculenta]	6.69	6.96	1.88	4.79	8.02	4.92	0.4	0.67	0.39	0.35	0.63	0.62	5.54	0.51
TRINITY_DN43291_c0_g1	K13425	-	-1.77259	down	WRKY35	probable WRKY transcription factor 65 [Hevea brasiliensis]	12.45	7.69	12.22	3.8	11.98	11.78	47.52	69.47	30.14	45.39	36.96	39.2	9.99	44.78
TRINITY_DN43293_c0_g3	K13412	EC:2.7.11.1	2.86972	up	CPK10	calcium-dependent protein kinase 10 [Jatropha curcas]	87.19	41.49	83.24	32.14	45.49	48.65	4.39	9.29	19.76	5.35	23.11	11.98	56.37	12.31
TRINITY_DN43295_c0_g1	K13412	EC:2.7.11.1	3.53574	up	CPK8	PREDICTED: calcium-dependent protein kinase 32 [Theobroma cacao]	17.45	20.81	28.23	20.2	18.56	17.02	1.06	1.86	1.81	1.55	3.3	4.29	20.38	2.31
TRINITY_DN43295_c0_g2	K13412	EC:2.7.11.1	3.59204	up	CPK8	calcium-dependent protein kinase 8 [Ricinus communis]	34.59	40.21	36.43	34.51	39.17	38.11	2.72	4.71	2.68	4.06	4.38	6.17	37.17	4.12
TRINITY_DN43295_c0_g4	K13412	EC:2.7.11.1	1.3487	up	CPK8	calcium-dependent protein kinase 32-like [Manihot esculenta]	54.88	59.45	73.54	63.02	76.63	77.67	33.69	41.15	37.58	38.66	26.13	39.45	67.53	36.11
TRINITY_DN43303_c0_g1	K13354	-	-2.7782	down	PNC1	peroxisomal adenine nucleotide carrier 1-like [Hevea brasiliensis]	0.56	1.48	1.11	0.98	1.12	0.97	8.66	8.35	7.78	13.14	9.91	9.88	1.04	9.62
TRINITY_DN43307_c3_g1	K13126	-	4.34453	up	NAC029	NAP [Jatropha curcas]	33.57	111.09	19.63	267.07	60.8	45.39	3.03	10.92	2.16	4.67	9.37	3.74	89.59	5.65
TRINITY_DN43316_c0_g1	K13229	EC:1.14.11.59	-1.58383	down	At1g06620	1-aminocyclopropane-1-carboxylate oxidase 1 [Cinnamomum micranthum f. kanehirae]	18.84	25.5	9.75	14.45	26.53	21.08	89.68	94.25	76.34	72.01	41.13	64.79	19.36	73.03
TRINITY_DN43320_c3_g5	K21026	EC:3.1.1.80	-1.25869	down	GLIP5	GDSL esterase/lipase 5 [Jatropha curcas]	2.87	2.8	1.9	1.1	4.57	4.15	6.96	7.67	5.22	10.12	12.2	9.79	2.9	8.66
TRINITY_DN43322_c0_g2	K19891	EC:3.2.1.39	4.32147	up	At5g56590	glucan endo-1,3-beta-glucosidase 12-like [Hevea brasiliensis]	5.85	4.1	1.91	1.04	7.32	6.25	0.11	0.11	0.39	0.38	0.21	0.61	4.41	0.3
TRINITY_DN43329_c2_g4	K12602	-	-1.36052	down	VIP3	WD repeat-containing protein VIP3 [Populus trichocarpa]	6.6	11.02	4.53	5.62	5.99	7.83	22.77	23.08	21.53	21.9	18.56	22.17	6.93	21.67
TRINITY_DN43350_c3_g4	K01557	EC:3.7.1.5	-2.16695	down	FAHD1	acylpyruvase FAHD1, mitochondrial [Manihot esculenta]	2.81	3.21	2.53	1.67	3.71	1.71	16.08	16.71	14.36	14.18	10.95	14.6	2.61	14.48
TRINITY_DN43352_c0_g1	K13237	EC:1.3.1.34	4.061	up	lvr	PREDICTED: carbonyl reductase [NADPH] 2-like isoform X1 [Populus euphratica]	7.37	4.05	9.79	8.31	5.57	12.55	0.18	0.41	0.89	0.79	0.93	0.78	7.94	0.66
TRINITY_DN43354_c2_g2	K10775	EC:4.3.1.24	4.8672	up	-	phenylalanine ammonia-lyase 2 [Rhizophora mangle]	101	19.91	409.73	59.28	48.84	126.83	4.56	3.57	5.24	5.36	9.35	5.26	127.6	5.56
TRINITY_DN43362_c2_g1	K05605	EC:3.1.2.4	-1.62966	down	At2g30660	PREDICTED: 3-hydroxyisobutyryl-CoA hydrolase 1-like isoform X1 [Gossypium raimondii]	3.68	8.17	5.94	10.84	0.94	0.99	27.21	19.46	23.41	14.49	19.57	19.86	5.09	20.67
TRINITY_DN43364_c2_g5	K19891	EC:3.2.1.39	5.15106	up	HGN1	glucan endo-1,3-beta-glucosidase, basic vacuolar isoform-like [Hevea brasiliensis]	11.21	5.67	11.67	16.33	3.94	16.84	0	0.12	0.04	0.3	1.85	0.11	10.94	0.4
TRINITY_DN43366_c1_g9	K00655	EC:2.3.1.51	-1.03873	down	MORF2	multiple organellar RNA editing factor 2, chloroplastic-like [Carica papaya]	29.63	38.09	12.46	32.54	29.04	29.7	89.54	94.37	65.73	80.04	58.02	75.68	28.58	77.23
TRINITY_DN43368_c0_g1	K16055	EC:2.4.1.15 3.1.3.12	-1.64157	down	TPS5	alpha,alpha-trehalose-phosphate synthase [UDP-forming] 5 isoform X1 [Sesamum indicum]	12.78	21.6	17.55	15.91	19.71	16.7	78.19	80.83	71.8	82.76	58.54	63.51	17.38	72.61
TRINITY_DN43370_c2_g1	K14396	-	-1.24525	down	PABN3	polyadenylate-binding protein 2-like isoform X1 [Abrus precatorius]	11.87	13.27	16.7	14.83	15.97	17.92	42.75	50.66	42.89	54.17	52.63	53.3	15.09	49.4
TRINITY_DN43370_c2_g4	K00430	EC:1.11.1.7	4.89907	up	PER52	PREDICTED: peroxidase P7 [Populus euphratica]	630.5	428.81	1532.42	581.28	969.96	585.72	9.2	16.94	35.4	17.56	16.38	63.07	788.12	26.42
TRINITY_DN43381_c1_g1	K02890	-	1.44236	up	rplV	39S ribosomal protein L22, mitochondrial-like [Ziziphus jujuba]	42.79	48.77	21.86	36.36	31.52	33.67	16.97	16.54	16.88	17.8	16.03	18.48	35.83	17.12
TRINITY_DN43404_c2_g1	K06689	EC:2.3.2.23	2.04014	up	UBC10	hypothetical protein CUMW_133810 [Citrus unshiu]	102.84	81.42	149.66	94.14	58.28	97.67	13.6	15.42	43.68	22.96	55.75	39.49	97.33	31.82
TRINITY_DN43405_c0_g1	K11517	EC:1.1.3.15	-4.52372	down	PPD7	LOW QUALITY PROTEIN: psbP domain-containing protein 7, chloroplastic [Populus trichocarpa]	0.83	0.74	0.25	0.83	0.87	0.7	35.73	34.08	11.63	23.33	6.96	10.97	0.7	20.45
TRINITY_DN43411_c0_g1	K00901	EC:2.7.1.107	-2.16404	down	-	kinesin-like protein KIFC3 isoform X1 [Populus trichocarpa]	1.69	1.83	0.89	2.41	1.8	1.09	10.73	8.55	9.86	15.29	10.46	9.48	1.62	10.73
TRINITY_DN43413_c0_g2	K12195	-	1.1042	up	VPS20.1	vacuolar protein sorting-associated protein 20 homolog 1-like [Hevea brasiliensis]	29.31	37.48	20.57	36.25	20.91	24.93	20.71	20.05	16.4	15.13	15.11	15.1	28.24	17.08
TRINITY_DN43421_c2_g4	K10249	EC:2.3.1.199	-1.38024	down	HOS3	elongation of fatty acids protein A-like [Herrania umbratica]	1.75	2.36	2.29	1.65	3.85	2.2	8.41	7.7	7.05	10.34	6.19	7.99	2.35	7.95
TRINITY_DN43423_c1_g1	K12135	-	-6.82038	down	COL16	zinc finger protein CONSTANS-LIKE 16-like [Manihot esculenta]	0.54	0.6	0.53	0.46	0.25	0.2	152.15	140.11	23.82	35.43	4.18	6.78	0.43	60.41
TRINITY_DN43425_c0_g2	K06013	EC:3.4.24.84	1.4468	up	FACE1	PREDICTED: CAAX prenyl protease 1 homolog [Nicotiana tomentosiformis]	20.95	31.32	12.9	20.17	16.35	20.04	7.34	8.37	10.89	10.05	9.45	10.5	20.29	9.43
TRINITY_DN43427_c0_g3	K13348	-	3.13514	up	-	PREDICTED: PXMP2/4 family protein 4-like [Populus euphratica]	24.47	17.5	15.67	15.04	20.98	28.89	2.22	2.84	5.84	2.45	3.83	2.46	20.43	3.27
TRINITY_DN43428_c2_g3	K13800	EC:2.7.4.14	2.79852	up	UMK1	PREDICTED: UMP-CMP kinase 3-like isoform X1 [Populus euphratica]	56.13	41.19	41.53	26.6	63.22	36.92	1.24	1.2	8.09	3.08	17.14	13.44	44.26	7.36
TRINITY_DN43459_c1_g1	K03801	EC:2.3.1.181	1.6066	up	At1g47578	Octanoyltransferase [Trema orientale]	3.57	8.11	2.74	8.34	5	2.99	1.16	1.68	1.96	1.91	4.45	2.33	5.12	2.25
TRINITY_DN43475_c0_g1	K01466	EC:3.5.2.5	-1.37199	down	ALN	PREDICTED: allantoinase [Populus euphratica]	5.79	6.74	8.81	6.5	9.07	7.97	26.03	21.27	25.79	31.29	28.91	25.58	7.48	26.48
TRINITY_DN43475_c2_g4	K01466	EC:3.5.2.5	1.19362	up	ALN	allantoinase [Quercus suber]	5.85	4.76	2.65	4.95	4.75	3.65	1.93	2.38	3.04	3.37	1.29	2.94	4.43	2.49
TRINITY_DN43476_c0_g3	K12446	EC:2.7.1.46	-2.77066	down	ARA1	unknown [Populus trichocarpa x Populus deltoides]	1.14	0.24	0.99	0.24	0.63	1.46	7.39	3.44	8.49	11.03	6.25	7.39	0.78	7.33
TRINITY_DN43478_c1_g3	K20725	-	8.47798	up	VQ8	VQ motif-containing protein 8, chloroplastic-like [Hevea brasiliensis]	167.86	18.29	133.05	48.91	65.02	56.21	0.66	0.26	0.15	0.39	0.05	0.2	81.56	0.28
TRINITY_DN43498_c3_g2	K03007	-	-1.00831	down	NRPB10L	PREDICTED: DNA-directed RNA polymerases II, IV and V subunit 10-like [Nicotiana tabacum]	66.56	93.89	53.14	55.87	47.25	59.84	163.67	146.34	166.42	174.26	206.12	150.27	62.76	167.85
TRINITY_DN43501_c0_g2	K13264	EC:2.3.1.115	-1.19637	down	3AT1	hypothetical protein POPTR_019G118000 [Populus trichocarpa]	0.83	3.01	0.98	0.97	1	1.21	6.96	5.38	2.56	3.92	1.96	1.72	1.33	3.75
TRINITY_DN43503_c1_g1	K01892	EC:6.1.1.21	6.64207	up	WRKY6	probable WRKY transcription factor 31 [Jatropha curcas]	254.14	80.68	316.03	196.91	117.38	223.47	2.22	2.21	4.3	1.25	2.94	2.66	198.1	2.6
TRINITY_DN43512_c0_g1	K13126	-	-2.71578	down	PSRP2	28 kDa ribonucleoprotein, chloroplastic [Manihot esculenta]	0.92	1.71	0.83	1.11	2.3	1.24	11.37	10.84	11.33	15.71	7.87	10.95	1.35	11.34
TRINITY_DN43529_c1_g7	K00121	EC:1.1.1.284 1.1.1.1	1.761	up	At4g22110	alcohol dehydrogenase-like 1 [Sesamum indicum]	1.1	1.07	0.77	1.1	1.54	0.89	0.07	0.58	0.27	0.06	0.67	0.59	1.08	0.37
TRINITY_DN43530_c0_g2	K20718	EC:2.7.11.1	-1.62353	down	ERECTA	LRR receptor-like serine/threonine-protein kinase ERECTA [Manihot esculenta]	47.68	34.63	59.65	57.56	56.13	41.66	175.61	172.78	126.11	144.01	136.95	103.53	49.55	143.16
TRINITY_DN43539_c2_g2	K14500	EC:2.7.11.1	-2.14521	down	At5g41260	probable serine/threonine-protein kinase BSK3 [Manihot esculenta]	0	0.54	0.45	0.21	0.91	0.13	1.78	2.16	2.58	2.59	1.35	2.82	0.37	2.21
TRINITY_DN43548_c1_g1	K21888	EC:1.8.5.1 2.5.1.18	-2.16341	down	ndhL	hypothetical protein F511_10099 [Dorcoceras hygrometricum]	12.78	9.05	10.06	7.76	26.89	19.16	86.83	84.97	91.76	90.91	60.95	88.39	14.28	83.97
TRINITY_DN43556_c0_g1	K13431	-	1.03676	up	Gtp-bp	PREDICTED: signal recognition particle receptor subunit alpha-like [Nicotiana tabacum]	0.39	0.29	0.6	0.61	0.41	0.59	0.2	0.22	0.41	0.36	0.32	0.54	0.48	0.34
TRINITY_DN43558_c0_g1	K05277	EC:1.14.20.4	6.95635	up	At3g11180	probable 2-oxoglutarate-dependent dioxygenase At5g05600 [Populus trichocarpa]	4.94	0.94	10.03	1.91	1.27	6.59	0	0.03	0	0.16	0.05	0	4.28	0.04
TRINITY_DN43566_c0_g1	K03002	EC:2.7.7.6	1.05104	up	-	PREDICTED: probable arabinosyltransferase ARAD1 [Populus euphratica]	3.39	5.81	1.43	3.98	2.7	2.21	3.54	2.15	1.1	2.36	1.58	0.89	3.25	1.94
TRINITY_DN43574_c1_g1	K10573	EC:2.3.2.23	1.64682	up	UBC2	Ubiquitin-conjugating enzyme E2 2 [Zea mays]	0.32	0.28	0.55	0.3	0.51	0.64	0.2	0.12	0	0.11	0.23	0.55	0.43	0.2
TRINITY_DN43579_c2_g4	K10577	-	-1.63739	down	MOB1A	Mob1/phocein, partial [Cynara cardunculus var. scolymus]	15.41	10.48	5.4	8.87	16.03	17.44	54.77	47.08	49.72	57.04	37.74	57.28	12.27	50.6
TRINITY_DN43582_c0_g1	K08658	EC:3.4.22.-	-2.45012	down	FACE2	LOW QUALITY PROTEIN: CAAX prenyl protease 2 [Ricinus communis]	2.1	1.38	1.14	0.86	2.19	1.11	9.31	11.13	8.49	12.18	9.32	8.63	1.46	9.84
TRINITY_DN43596_c3_g1	K12309	EC:3.2.1.23	-1.63164	down	BGAL1	beta-galactosidase 1-like isoform X1 [Hevea brasiliensis]	1.04	0.27	2.61	0.73	6.76	1.26	15.21	8.83	9.42	10.02	1.16	7.4	2.11	8.67
TRINITY_DN43598_c1_g1	K12900	-	8.5418	up	ABR1	ethylene-responsive transcription factor ABR1-like [Hevea brasiliensis]	20.23	27.07	194.5	161.15	71.1	85.05	0.28	0.37	0.97	0.4	0.19	0	93.18	0.37
TRINITY_DN43622_c1_g2	K03236	-	2.98831	up	-	eukaryotic translation initiation factor 1A-like isoform X1 [Durio zibethinus]	176.14	230.34	180.18	234.34	192.35	182.31	19.9	22.72	33.62	26.03	52.7	45.86	199.28	33.47
TRINITY_DN43629_c0_g2	K09841	EC:1.1.1.288	-2.75906	down	ABA2	xanthoxin dehydrogenase-like [Hevea brasiliensis]	1.43	1.82	0.92	0.65	1.36	1.42	7.69	9.13	10.39	17.81	11.4	13.51	1.27	11.65
TRINITY_DN43636_c0_g6	K16222	-	4.04481	up	CDF2	cyclic dof factor 1-like isoform X1 [Hevea brasiliensis]	9.31	7.37	11.31	6.63	6.78	5.36	0.19	0.84	0.47	0.49	0.93	0.77	7.79	0.61
TRINITY_DN43637_c2_g5	K12126	-	6.41529	up	PIF3	unknown [Populus trichocarpa]	0.99	9.02	1.54	1.44	2.2	2.52	0	0.05	0.07	0.02	0.02	0.02	2.95	0.03
TRINITY_DN43640_c0_g3	K00856	EC:2.7.1.20	-1.29363	down	ADK2	Adenosine kinase 2 [Apostasia shenzhenica]	15.41	4.21	11.77	8.25	24.18	14	43.22	41.19	53.43	49.38	35.18	22.49	12.97	40.82
TRINITY_DN43641_c0_g1	K00921	EC:2.7.1.150	-1.60324	down	FAB1D	LOW QUALITY PROTEIN: putative 1-phosphatidylinositol-3-phosphate 5-kinase FAB1D [Ricinus communis]	0.3	0.93	0.75	0.21	1.11	0.49	1.84	1.91	2.78	4.86	1.58	2.51	0.63	2.58
TRINITY_DN43642_c0_g6	K04125	EC:1.14.11.13	-1.86249	down	GA2OX8	gibberellin 2-beta-dioxygenase 8-like isoform X1 [Manihot esculenta]	5.12	5.44	7.32	5.69	5.42	5.5	16.21	13.72	23.88	13.22	15.85	27.74	5.75	18.44
TRINITY_DN43652_c2_g1	K01867	EC:6.1.1.2	-1.60204	down	SNF4	sucrose nonfermenting 4-like protein [Ricinus communis]	1.81	3.11	1.94	3.09	2.79	2.26	6.86	8.34	8.28	7.69	7.17	7.43	2.5	7.63
TRINITY_DN43660_c2_g2	K11098	-	1.48834	up	At4g30220	probable small nuclear ribonucleoprotein F [Citrus clementina]	72.82	94.61	64.11	81.76	57.2	70.87	31.59	30.71	38.66	32.84	34.2	34.38	73.56	33.73
TRINITY_DN43661_c0_g2	K05280	EC:1.14.14.82	2.01413	up	CYP75B2	PREDICTED: flavonoid 3'-monooxygenase [Populus euphratica]	37.5	22.6	13.75	17.83	38.84	59.76	3.38	5.84	9.96	6.73	24.12	11.52	31.71	10.26
TRINITY_DN43661_c0_g3	K05280	EC:1.14.14.82	2.54911	up	CYP75B2	flavonoid 3'-monooxygenase [Manihot esculenta]	4.15	0.91	2.97	0.75	1.54	1.69	0.1	0.28	0.67	0.1	0.08	1.27	2	0.42
TRINITY_DN43663_c1_g2	K20547	EC:3.2.1.14	1.10481	up	-	endochitinase 2 [Populus trichocarpa]	47.68	19.25	22	13.2	28.46	28.73	5.1	8.88	14.68	11.86	34.94	24.97	26.55	16.74
TRINITY_DN43674_c0_g1	K10712	EC:1.13.11.19	-5.77149	down	PCO3	plant cysteine oxidase 3-like [Hevea brasiliensis]	0.68	0.56	1.22	0.72	0.41	0.62	64.8	61.16	47.73	49.3	38.19	40.87	0.7	50.34
TRINITY_DN43679_c0_g4	K13354	-	-2.33762	down	PXN	peroxisomal nicotinamide adenine dinucleotide carrier-like isoform X3 [Manihot esculenta]	2.89	6.84	0	0.44	0.57	1.73	10.25	12.12	5.95	18.33	13.21	17.06	2.08	12.82
TRINITY_DN43689_c0_g1	K12900	-	-2.19066	down	-	SC35-like splicing factor 30 isoform 1 [Theobroma cacao]	2.34	1.52	3.3	4.63	1.21	1.69	7.95	7.06	2.2	9.12	4.49	3.15	2.45	5.66
TRINITY_DN43691_c3_g5	K13993	-	-2.69605	down	HSP18.2	PREDICTED: 18.5 kDa class I heat shock protein-like [Populus euphratica]	3.02	4.2	2.41	3.19	4.61	3.49	19.27	19.95	24.09	29.29	46.13	39.33	3.49	29.68
TRINITY_DN43694_c1_g2	K15397	EC:2.3.1.199	2.026	up	KCS19	PREDICTED: 3-ketoacyl-CoA synthase 21-like [Populus euphratica]	19.31	3.79	12.16	2.64	19.63	12.8	1.21	3.21	4.24	1.48	1.79	11.13	11.72	3.84
TRINITY_DN43696_c0_g4	K08516	-	2.19202	up	YKT61	PREDICTED: VAMP-like protein YKT61 [Lupinus angustifolius]	4.48	2.92	4.72	2.06	3	1.44	1.86	0.83	0.66	0.95	0.66	0.32	3.1	0.88
TRINITY_DN43699_c1_g6	K20725	-	2.36526	up	MKS1	protein MKS1-like [Hevea brasiliensis]	67.91	31.61	40.32	55.39	49.47	60.23	10.14	11.8	21.93	8.19	9.73	16.69	50.82	13.08
TRINITY_DN43702_c1_g1	K10683	-	-1.31628	down	PCMP-H76	pentatricopeptide repeat-containing protein At3g47530 [Jatropha curcas]	0.37	0.79	0.64	0.38	0.28	0.5	2.24	1.9	1.32	1.65	0.89	1.28	0.49	1.55
TRINITY_DN43708_c0_g1	K05396	EC:4.4.1.15	-2.75732	down	At3g26115	PREDICTED: D-cysteine desulfhydrase 2, mitochondrial [Populus euphratica]	0.82	2.43	0.58	0.81	1.52	1.5	12.38	11.1	9.92	12.3	9.35	9.81	1.28	10.81
TRINITY_DN43710_c3_g9	K00787	EC:2.5.1.1 2.5.1.10	6.95777	up	At1g12150	WEB family protein At1g12150-like [Hevea brasiliensis]	1.09	0.34	8.22	1.18	1.01	0.72	0	0	0.03	0	0.03	0.06	2.09	0.02
TRINITY_DN43723_c1_g1	K01883	EC:6.1.1.16	-1.68925	down	SYCO	cysteine--tRNA ligase, chloroplastic/mitochondrial isoform X1 [Jatropha curcas]	6.69	5.5	2.89	3	8.69	4.84	27.08	23.82	22.21	21.85	18.41	19.86	5.27	22.21
TRINITY_DN43723_c1_g2	K01883	EC:6.1.1.16	-1.93733	down	SYCO	PREDICTED: cysteine--tRNA ligase, cytoplasmic isoform X1 [Nicotiana sylvestris]	2.13	4.42	1.99	4.35	2.73	3.12	20.15	18.65	14.7	20.8	8.29	12.67	3.12	15.88
TRINITY_DN43733_c0_g2	K15398	EC:1.14.-.-	1.21214	up	CYP86A22	cytochrome P450 86A22-like [Hevea brasiliensis]	14.12	7.71	8.56	2.27	30.62	12.52	4.05	8.93	4.43	10.97	5.14	8.76	12.63	7.05
TRINITY_DN43733_c0_g4	K15398	EC:1.14.-.-	7.3144	up	CYP86A22	cytochrome P450 86A22 [Jatropha curcas]	1.74	0.14	17.11	0.89	1.04	0.97	0	0.07	0.07	0	0	0	3.65	0.02
TRINITY_DN43744_c2_g4	K01583	EC:4.1.1.19	3.94333	up	-	arginine decarboxylase [Jatropha curcas]	131.88	91.49	211.81	86.4	63.34	118.81	5.89	3.78	12.21	12.02	15.73	12.36	117.29	10.33
TRINITY_DN43754_c1_g1	K20495	EC:1.14.14.80	-2.36513	down	CYP704C1	cytochrome P450 704C1-like isoform X1 [Hevea brasiliensis]	4.07	5.5	1.99	3.05	4.77	3.82	28.37	25.57	22.28	27.42	22.87	24.4	3.87	25.15
TRINITY_DN43767_c0_g1	K09841	EC:1.1.1.288	8.01641	up	SDR2a	PREDICTED: short-chain dehydrogenase reductase 2a-like [Populus euphratica]	42.71	22.39	70.04	40.01	60.44	46.86	0.25	0.22	0.27	0.27	0.08	0.29	47.07	0.23
TRINITY_DN43785_c3_g4	K00940	EC:2.7.4.6	1.62365	up	Nme2	nucleoside diphosphate kinase-like [Quercus suber]	0.64	0.66	2.69	2.67	2.92	2.37	0.39	0.13	0.76	0.85	1.52	1.61	1.99	0.88
TRINITY_DN43787_c0_g1	K01188	EC:3.2.1.21	-2.11262	down	BGLU4	beta-glucosidase 42 [Manihot esculenta]	27.27	32.97	28.25	30.01	30.21	28.27	210.48	194.84	152.46	180.21	124.64	151.12	29.5	168.96
TRINITY_DN43799_c1_g1	K00939	EC:2.7.4.3	1.752	up	ADK	probable adenylate kinase 6, chloroplastic isoform X1 [Manihot esculenta]	32.21	28.02	15.77	26.01	18.22	23.48	6.51	5.86	10.22	10.69	18.22	9.67	23.95	10.2
TRINITY_DN43803_c1_g1	K06617	EC:2.4.1.82	1.37188	up	RFS2	Raffinose synthase [Corchorus olitorius]	1	2.64	5.83	1.11	1.65	1.97	0.99	0.96	0.75	2.11	1.06	1.54	2.37	1.24
TRINITY_DN43813_c0_g1	K03116	-	-1.96161	down	TATA	sec-independent protein translocase protein TATA, chloroplastic-like [Populus trichocarpa]	24.15	35.5	17.99	25.87	42.75	31.18	155.14	167.18	147.48	147.14	134.57	146.1	29.57	149.6
TRINITY_DN43819_c2_g1	K01807	EC:5.3.1.6	-1.12521	down	RPI3	probable ribose-5-phosphate isomerase 3, chloroplastic [Jatropha curcas]	26.92	34.31	16.87	27.35	60.19	38.42	129.04	99.59	118.25	102.9	77.89	106.86	34.01	105.75
TRINITY_DN43824_c1_g1	K01623	EC:4.1.2.13	-1.89608	down	FBA1	PREDICTED: fructose-bisphosphate aldolase 2, chloroplastic [Tarenaya hassleriana]	530.02	649.92	529.31	751.03	1108.58	661.65	4697.65	3739.57	3313.63	2915.3	2473.95	3227.71	705.08	3394.63
TRINITY_DN43825_c0_g1	K13126	-	-1.47223	down	CID12	polyadenylate-binding protein-interacting protein 11-like [Hevea brasiliensis]	9.19	7.2	5.86	5.51	7.1	6.98	24.98	28.5	27.27	22.92	21.75	22.8	6.97	24.7
TRINITY_DN43837_c1_g8	K07375	-	-4.1907	down	TUBB1	beta-tubulin 10 [Salix arbutifolia]	0.35	0.36	0.64	0.11	0.28	0.25	3.13	4.07	4.59	22.69	3.99	11.15	0.33	8.27
TRINITY_DN43853_c0_g2	K01488	EC:3.5.4.4	-1.06958	down	ADAL	PREDICTED: adenosine deaminase-like protein isoform X1 [Populus euphratica]	2.2	0.99	0.74	0.81	1.51	0.76	2.26	2.22	4.1	2.26	5.14	3.34	1.17	3.22
TRINITY_DN43855_c0_g7	K03357	-	-2.61795	down	APC10	anaphase-promoting complex subunit 10 isoform X1 [Populus trichocarpa]	2.21	2.72	1.45	3.82	1.58	1.63	16.95	17.14	11.3	21.23	11.83	20.24	2.23	16.45
TRINITY_DN43856_c0_g1	K15227	EC:1.3.1.78	3.14011	up	TYRAAT1	arogenate dehydrogenase 1, chloroplastic [Jatropha curcas]	19.66	16.97	23.17	30.01	14.41	21.55	1.12	2.87	4.64	2.7	3.18	1.66	20.96	2.69
TRINITY_DN43864_c1_g7	K01528	EC:3.6.5.5	4.08337	up	-	dynamin-related protein 5A [Morus notabilis]	11.99	12.58	23.98	15.14	12.26	16.31	0.49	0.72	1.59	0.28	1.94	2.18	15.38	1.2
TRINITY_DN43868_c0_g3	K14486	-	-1.23431	down	ARF3	auxin response factor 3 [Ricinus communis]	0.76	0.86	0.85	1.64	1.4	1.31	2.86	3.28	3.03	4.65	3.85	3.73	1.14	3.57
TRINITY_DN43871_c0_g3	K01689	EC:4.2.1.11	-1.24613	down	ENO3	cytosolic enolase 3 [Morus notabilis]	2.81	6.1	2.69	3.64	4.89	3.26	9.84	13.28	11.73	16.49	10.78	10.25	3.9	12.06
TRINITY_DN43876_c0_g1	K08913	-	2.32442	up	CAB37	chlorophyll a-b binding protein 37, chloroplastic [Olea europaea var. sylvestris]	6.35	4.16	10.69	12.29	7.68	9.32	1.93	2.92	0.06	0.22	4.43	3.72	8.41	2.21
TRINITY_DN43879_c1_g1	K01915	EC:6.3.1.2	1.64476	up	-	glutamine synthetase cytosolic isozyme 2 [Sesamum indicum]	1.46	0.82	2.18	1.2	1.74	2.2	0.6	0.19	0.37	0.84	1.04	1.07	1.6	0.69
TRINITY_DN43896_c1_g4	K03006	EC:2.7.7.6	1.24728	up	FRS8	hypothetical protein GOBAR_DD36257 [Gossypium barbadense]	4.97	6.01	2.79	3.06	3.46	3.56	3.36	4.59	2.65	3.31	1.93	2.32	3.97	3.03
TRINITY_DN43897_c1_g1	K00858	EC:2.7.1.23	1.9993	up	NADK2	NAD kinase 2, chloroplastic [Sesamum indicum]	0.1	0.16	0.2	0.23	0.14	0.16	0.05	0.03	0.03	0.02	0.07	0.1	0.17	0.05
TRINITY_DN43917_c3_g1	K17888	-	-2.02879	down	ATG10	ubiquitin-like-conjugating enzyme ATG10 [Hevea brasiliensis]	1.27	2.13	1.7	1.65	2.89	1.74	12.4	13.02	8.87	12.39	8.76	9.03	1.9	10.74
TRINITY_DN43926_c0_g3	K18081	EC:3.1.3.64 3.1.3.95	-1.412	down	HIPP45	copper transport protein ATX1 [Momordica charantia]	0.55	1.74	0.87	0.96	2.37	0.55	2.15	1.94	3.45	4.67	4.27	4.38	1.17	3.48
TRINITY_DN43943_c1_g1	K13459	-	-2.28906	down	-	probable disease resistance protein At4g27220 isoform X1 [Populus trichocarpa]	1.85	3.19	1.88	1.94	1.69	1.09	15.23	15.32	8.83	11.53	7.71	13.36	1.94	12
TRINITY_DN43943_c1_g5	K13459	-	-2.76731	down	-	probable disease resistance protein At4g27220 [Populus trichocarpa]	0.59	0.3	1.14	0.21	0.36	0.87	6.33	8.18	2.83	6	4.57	4.21	0.58	5.35
TRINITY_DN43946_c0_g8	K01662	EC:2.2.1.7	1.95039	up	Os07g0190000	probable 1-deoxy-D-xylulose-5-phosphate synthase 2, chloroplastic [Sesamum indicum]	0.49	0.33	0.24	0.57	0.31	0.23	0	0.15	0	0.02	0.2	0.34	0.36	0.12
TRINITY_DN43956_c0_g1	K12502	EC:2.1.1.295	-1.93938	down	VTE3	PREDICTED: 2-methyl-6-phytyl-1,4-hydroquinone methyltransferase, chloroplastic [Theobroma cacao]	25.78	35.08	28.91	19.6	77.11	45.27	174.52	183.83	203.69	204.12	163.79	225.91	38.63	192.64
TRINITY_DN43959_c0_g1	K12831	-	-1.13699	down	SF3B4	RNA-binding protein 7 [Manihot esculenta]	3.31	6.99	2.03	3.05	6.56	4.59	10.4	14.7	11.86	16.77	10.2	11.25	4.42	12.53
TRINITY_DN43965_c0_g7	K02870	-	1.13245	up	Rpl12	60S ribosomal protein L12 [Quercus suber]	0.65	4.58	5.24	5.31	8.56	6.6	1.33	1.56	3.24	2.85	4.39	5.67	5.16	3.17
TRINITY_DN43969_c0_g2	K12890	-	1.91388	up	SR30	Splicing factor-like protein [Trema orientale]	4.27	9.39	4.79	9.58	7.85	13.71	3.54	3.61	3.44	2.25	3.66	2.59	8.27	3.18
TRINITY_DN43988_c0_g3	K10599	EC:2.3.2.27	2.00812	up	LUH	transcriptional corepressor LEUNIG_HOMOLOG isoform X2 [Sesamum indicum]	0.12	0.13	0.35	0.38	0.3	0.27	0.07	0.09	0.02	0.02	0.1	0.18	0.26	0.08
TRINITY_DN43999_c0_g1	K12946	EC:3.4.-.-	1.0125	up	At2g22425	probable signal peptidase complex subunit 1 [Hevea brasiliensis]	21.43	21.75	8.17	13.53	16.32	15.6	8.65	9.64	11.19	10.59	9.5	11.37	16.13	10.16
TRINITY_DN44006_c0_g10	K10636	EC:2.3.2.27	4.22627	up	RIN2	E3 ubiquitin protein ligase RIN2 [Carya cathayensis]	9.8	5.96	7.91	4.79	2.78	5.48	0.66	1.05	0.24	0.23	0.16	0.23	6.12	0.43
TRINITY_DN44008_c3_g1	K01187	EC:3.2.1.20	-1.39222	down	-	uncharacterized protein LOC112034505 [Quercus suber]	4.29	6.06	5.81	4.92	4.99	4.44	15.26	16.59	17.04	14.87	13.66	16.13	5.08	15.59
TRINITY_DN44010_c0_g1	K03126	-	-3.42895	down	-	metallophosphoesterase 1 [Jatropha curcas]	0.44	0.74	0.53	0.19	0.69	0.42	5.99	6.33	7.15	8.4	6.21	7.39	0.5	6.91
TRINITY_DN44016_c2_g1	K02885	-	1.35429	up	RPL19A	60S ribosomal protein L19-1 [Prunus persica]	2.39	0.75	1.39	1.47	1.41	0.72	1.19	0.27	0.32	0.13	0.7	0.72	1.36	0.56
TRINITY_DN44018_c0_g6	K18875	-	-1.99589	down	EDS1	protein EDS1B [Ricinus communis]	9.62	5.79	2.93	2.66	8.08	5.4	12.25	12.92	30.21	36.47	35.67	47.38	5.75	29.15
TRINITY_DN44026_c0_g2	K13424	-	4.7533	up	WRKY28	probable WRKY transcription factor 71 [Populus trichocarpa]	17.66	12.46	37.25	14.08	20.6	27.4	0.34	0.62	1.59	0.41	0.5	3.45	21.58	1.15
TRINITY_DN44027_c0_g6	K14486	-	1.86243	up	ARF21	hypothetical protein CDL12_12156 [Handroanthus impetiginosus]	0.15	0.1	0.26	0.32	0.27	0.26	0.09	0.07	0.06	0.01	0.11	0.15	0.23	0.08
TRINITY_DN44027_c0_g7	K14486	-	1.77515	up	ARF19	auxin response factor 19 [Populus trichocarpa]	25.65	36.49	18.28	19.04	20.46	23.61	3.01	7.42	10.17	9.1	13.15	13.34	23.92	9.37
TRINITY_DN44043_c0_g1	K14495	-	1.06556	up	At2g27310	F-box protein At2g27310 [Ricinus communis]	13.03	45.01	15.12	25.52	27.34	25.96	31.04	21.95	13.01	16.54	6.56	6.53	25.33	15.94
TRINITY_DN44049_c4_g2	K09842	EC:1.2.3.14	2.58665	up	Os03g0790900	PREDICTED: LOW QUALITY PROTEIN: indole-3-acetaldehyde oxidase-like [Populus euphratica]	2.27	2.1	1.39	2.64	1.98	5.39	0.37	0.72	0.83	0.46	0	1.04	2.63	0.57
TRINITY_DN44052_c0_g1	K05298	EC:1.2.1.13	2.64352	up	GAPB	glyceraldehyde-3-phosphate dehydrogenase B, chloroplastic [Sesamum indicum]	0.11	0.24	11.98	0.45	15.22	0.27	0.18	0.04	0.19	0	0.25	0.17	4.71	0.14
TRINITY_DN44052_c0_g2	K05298	EC:1.2.1.13	2.38866	up	GAPB	Glyceraldehyde-3-phosphate dehydrogenase [Actinidia chinensis var. chinensis]	0.37	0.28	0.69	0.48	0.35	0.5	0.14	0.13	0.07	0	0.18	0.19	0.45	0.12
TRINITY_DN44056_c0_g1	K00264	EC:1.4.1.13 1.4.1.14	3.91354	up	-	PREDICTED: glutamate synthase 1 [NADH], chloroplastic [Nelumbo nucifera]	123.74	204.18	173.03	172.85	170.35	135.45	13.8	15.24	13.33	20.4	12.48	17.59	163.27	15.47
TRINITY_DN44061_c1_g3	K03062	-	2.23705	up	TBP2	26S proteasome regulatory subunit 4 homolog B-like [Papaver somniferum]	4.82	8.51	1.88	4.03	2.32	1.73	0.62	0.4	1.14	0.56	0.89	0.17	3.88	0.63
TRINITY_DN44061_c1_g5	K03062	-	1.07544	up	TBP2	hypothetical protein DVH24_010452 [Malus domestica]	70.79	102.08	51.26	67.2	52.44	58.38	39.57	41.69	41.45	45.81	47.37	42.68	67.02	43.09
TRINITY_DN44073_c0_g3	K03809	EC:1.6.5.2	5.52893	up	FQR1	hypothetical protein MA16_Dca020551 [Dendrobium catenatum]	36.48	16.15	47.03	15.62	12.23	29.86	0.31	0.25	0.75	0.58	1.17	1.48	26.23	0.76
TRINITY_DN44082_c0_g3	K03527	EC:1.17.7.4	2.14315	up	ISPH	4-hydroxy-3-methylbut-2-enyl diphosphate reductase [Handroanthus impetiginosus]	1.23	0.53	0.61	0.87	0.76	0.56	0.03	0.26	0.09	0.27	0.39	0.3	0.76	0.22
TRINITY_DN44084_c0_g4	K10260	-	5.4807	up	PUB21	U-box domain-containing protein 21-like [Hevea brasiliensis]	143.96	21.5	237.93	133.85	41.14	70.47	0.56	0.3	2.18	2.4	8.41	5.99	108.14	3.31
TRINITY_DN44085_c2_g2	K00423	EC:1.10.3.3	-2.45193	down	At3g03360	hypothetical protein AQUCO_01500442v1 [Aquilegia coerulea]	0.62	0.94	0.12	0.24	0.69	0.42	5.45	5.69	1.93	6.43	2.52	1.45	0.51	3.91
TRINITY_DN44090_c1_g1	K17744	EC:1.1.1.316	-1.56694	down	AKR1	Aldo/keto reductase [Corchorus olitorius]	42.84	35.96	18.48	20.76	33.84	26.36	92.3	107.26	116.14	104.44	138.67	121.91	29.71	113.45
TRINITY_DN44092_c0_g1	K10755	-	-2.79022	down	-	uncharacterized protein LOC111372609 [Olea europaea var. sylvestris]	3.32	6.77	6.48	4.12	6.46	4.96	54.74	51.45	34.57	47.59	46.39	51.32	5.35	47.68
TRINITY_DN44093_c0_g3	K02896	-	1.79478	up	RPL24	predicted protein [Hordeum vulgare subsp. vulgare]	0.78	3.66	8.12	6.45	6.68	6.9	1.39	1.17	1.96	3	3.33	2.09	5.43	2.16
TRINITY_DN44098_c0_g4	K12623	-	2.84311	up	LSM4	sm-like protein LSM4 isoform X2 [Manihot esculenta]	5.43	3.26	11.29	5.12	8.14	4.47	0.21	0.67	1.04	1.64	1.33	1.09	6.28	1
TRINITY_DN44099_c1_g1	K04382	EC:3.1.3.16	1.56764	up	PP2A1	serine/threonine-protein phosphatase, partial [Genlisea aurea]	0.78	0.34	0.88	0.81	0.56	0.52	0.31	0.63	0.2	0.25	0.53	0.08	0.65	0.33
TRINITY_DN44105_c0_g4	K04506	EC:2.3.2.27	1.10799	up	SINAT2	PREDICTED: E3 ubiquitin-protein ligase SINAT2 [Populus euphratica]	8.46	8.25	6.55	6.77	7.5	7.79	1.94	2.58	6.56	3.2	5.74	7.27	7.55	4.55
TRINITY_DN44108_c4_g1	K12873	-	-1.3313	down	Os05g0446300	protein BUD31 homolog 2 [Jatropha curcas]	6.43	9.19	1.93	3.72	8.14	5.84	12.68	15.46	21.43	19.09	20.15	23.3	5.88	18.68
TRINITY_DN44110_c1_g1	K02871	-	-1.31219	down	RPL13	50S ribosomal protein L13, chloroplastic-like [Hevea brasiliensis]	22.55	32.42	19.18	35.31	52.99	38.27	117.4	107.55	107.83	100.83	67.88	103.33	33.45	100.8
TRINITY_DN44114_c0_g2	K03043	EC:2.7.7.6	-2.16691	down	rpoB	PREDICTED: uncharacterized protein LOC105120651 isoform X1 [Populus euphratica]	1.73	2.36	1.02	0.9	1.8	0.91	5.29	7.55	5.14	5.08	5.64	5.33	1.45	5.67
TRINITY_DN44122_c0_g1	K14431	-	-2.21159	down	TGA4	Transcription factor TGA1 [Morus notabilis]	4.52	5.68	3.67	4.43	4.42	4.72	24.87	23.89	20.81	27.41	21.26	20.94	4.57	23.2
TRINITY_DN44123_c0_g1	K08914	-	9.09193	up	CAB13	PREDICTED: chlorophyll a-b binding protein 13, chloroplastic-like [Nicotiana sylvestris]	0	0	22.6	0	12.96	0	0	0	0	0	0	0	5.93	0
TRINITY_DN44123_c0_g2	K08912	-	6.84906	up	CAB2R	chlorophyll a-b binding protein 50, chloroplastic, partial [Nicotiana attenuata]	0	0	26.97	0	12.24	0	0	0	0	0	0	0	6.54	0
TRINITY_DN44123_c0_g4	K08914	-	1.89544	up	CAB13	chlorophyll a-b binding protein 13, chloroplastic [Sesamum indicum]	1.77	1.07	1.5	1.37	0.29	0.8	0.88	0.25	0	0.23	0.6	0.35	1.13	0.39
TRINITY_DN44128_c0_g7	K00850	EC:2.7.1.11	9.41048	up	PFK7	PREDICTED: ATP-dependent 6-phosphofructokinase 3-like [Tarenaya hassleriana]	10.41	6.34	75.75	14.76	15.77	15.92	0.16	0	0.16	0	0	0	23.16	0.05
TRINITY_DN44130_c0_g1	K08695	EC:1.3.1.77	-1.15031	down	BEN1	putative anthocyanidin reductase [Ricinus communis]	27.67	21.12	24.53	19.91	38.91	25.39	82.87	72.12	79.36	76.65	66.65	67.33	26.25	74.16
TRINITY_DN44130_c0_g5	K10526	EC:6.2.1.-	1.6752	up	4CLL9	PREDICTED: 4-coumarate--CoA ligase-like 9 [Pyrus x bretschneideri]	49.74	68.86	69.81	55.57	50.82	64.62	26.18	24.86	19.87	27.46	20.17	27.91	59.9	24.41
TRINITY_DN44132_c1_g1	K14432	-	1.35508	up	-	-	1.09	1.62	0.83	0.65	0.51	0.79	0.37	0.85	0.12	0.35	0.57	0.41	0.92	0.45
TRINITY_DN44135_c0_g3	K01179	EC:3.2.1.4	-1.87613	down	At2g32990	endoglucanase 11 [Jatropha curcas]	0.45	0.63	0.52	0.34	0.95	0.35	0.41	1.01	1.56	7.01	2.78	2.92	0.54	2.61
TRINITY_DN44145_c0_g1	K11420	EC:2.1.1.43	-1.13644	down	-	uncharacterized protein LOC7491346 [Populus trichocarpa]	4.18	5.03	3.19	3.11	4.88	4.85	12.07	13.14	11.25	14.2	9.31	11.87	4.21	11.97
TRINITY_DN44160_c1_g2	K00847	EC:2.7.1.4	3.47215	up	At5g51830	probable fructokinase-7 [Jatropha curcas]	60.58	45.31	65.05	47.37	57.05	33.88	4.04	2.35	8.16	6.6	7.82	9.45	51.54	6.4
TRINITY_DN44173_c2_g1	K20802	EC:4.1.2.10	2.62279	up	SABP2	salicylic acid-binding protein 2 [Populus alba x Populus glandulosa]	72.19	29.9	71.13	46.73	50.25	39.22	5.1	4.05	10.94	23.27	4.33	18.61	51.57	11.05
TRINITY_DN44178_c0_g1	K13422	-	-1.19759	down	BHLH13	bHLH1 protein [Tectona grandis]	2.08	3.91	0.67	2.63	2.73	2.38	8.12	8.57	6.55	8.07	5.01	5.61	2.4	6.99
TRINITY_DN44186_c2_g1	K12890	-	1.88623	up	SR34B	serine/arginine-rich-splicing factor SR34-like isoform X1 [Manihot esculenta]	18.45	50.2	20.43	32.68	34.84	53.8	18.25	21.96	11.27	7.58	13.2	9.26	35.07	13.59
TRINITY_DN44201_c2_g1	K00281	EC:1.4.4.2	-2.50565	down	GDCSP	glycine dehydrogenase (decarboxylating), mitochondrial-like [Hevea brasiliensis]	16.28	26.9	31.19	22.15	56.01	29.77	175.91	223.3	145.19	200.15	101.95	191.39	30.38	172.98
TRINITY_DN44201_c2_g3	K00281	EC:1.4.4.2	2.21297	up	GDCSP	glycine dehydrogenase (decarboxylating), mitochondrial [Sesamum indicum]	1.18	0.83	3.26	3.22	2.83	2.5	0.9	1.04	0.51	0	0.73	0.48	2.3	0.61
TRINITY_DN44208_c0_g3	K10256	EC:1.14.19.6 1.14.19.22	3.57583	up	FAD2	microsomal omega-6-desaturase [Millettia pinnata]	174.69	176.25	116.93	157.43	151.64	158.13	10.45	11.06	21.54	21.32	17.06	23.77	155.84	17.53
TRINITY_DN44208_c0_g4	K10256	EC:1.14.19.6 1.14.19.22	6.77441	up	FAD2	delta(12)-fatty-acid desaturase FAD2 [Quercus suber]	271.71	77.51	233.88	163.46	147.62	195.38	1.21	2.1	3.69	1.52	2.02	2.98	181.59	2.25
TRINITY_DN44208_c0_g6	K00262	EC:1.4.1.4	-1.93421	down	-	NADP-specific glutamate dehydrogenase isoform X1 [Manihot esculenta]	1.28	1.63	1.91	0.64	1.51	2.22	6.45	5.82	8.96	8.91	8.73	8.21	1.53	7.85
TRINITY_DN44216_c2_g1	K01689	EC:4.2.1.11	2.01896	up	Eno1	hypothetical protein BRARA_C01835 [Brassica rapa]	0.25	0.47	2.55	2.42	2.34	2.66	0.58	0.26	0.73	0.62	0.64	0.65	1.78	0.58
TRINITY_DN44220_c0_g3	K12160	-	-2.15322	down	SUMO1	small ubiquitin-related modifier 1-like [Ziziphus jujuba]	13.31	17.54	9.67	9.4	11.21	8.81	76.45	74.01	63.9	59.53	52.87	60.78	11.66	64.59
TRINITY_DN44226_c0_g1	K01210	EC:3.2.1.58	2.01869	up	XOG1	PREDICTED: probable glucan 1,3-beta-glucosidase A [Populus euphratica]	3.31	0.71	0.51	0.03	0.14	2.71	0.06	0.17	0.82	0.14	0.25	0.96	1.23	0.4
TRINITY_DN44229_c2_g5	K13420	EC:2.7.11.1	2.17872	up	-	PREDICTED: probable LRR receptor-like serine/threonine-protein kinase At1g34110 [Populus euphratica]	1.62	1.38	6.34	1.95	2.21	1.36	0.58	0.31	1.48	0.68	0.68	0.66	2.48	0.73
TRINITY_DN44230_c1_g1	K19199	EC:2.1.1.43	-2.60942	down	-	ribosomal lysine N-methyltransferase 4 isoform X5 [Jatropha curcas]	2.21	2.51	2.32	2.79	2.27	2.12	22.33	18.18	16.05	17.91	14.96	13.07	2.37	17.08
TRINITY_DN44232_c0_g1	K18551	EC:3.1.3.-	2.00307	up	-	uncharacterized protein C24B11.05-like [Hevea brasiliensis]	13.67	11.6	22.54	8.19	8.25	10.13	2.41	4.65	4.32	2.71	10.24	3.26	12.4	4.6
TRINITY_DN44233_c0_g5	K14396	-	1.14722	up	PABN1	polyadenylate-binding protein 3-like, partial [Ziziphus jujuba]	4.64	5.84	5.22	7.81	3.97	3.63	3.64	5.09	4.83	3.95	4.94	3.7	5.18	4.36
TRINITY_DN44238_c1_g1	K01535	EC:3.6.3.6	6.14828	up	AHA3	PREDICTED: ATPase 8, plasma membrane-type [Cucumis melo]	4.82	3.01	18.82	6.15	7.75	7	0.33	0	0	0.23	0.32	0.23	7.92	0.19
TRINITY_DN44239_c0_g5	K12589	-	-1.81957	down	-	exosome complex component RRP42 [Ricinus communis]	1.86	4.87	3.89	2.08	7.25	2.84	28.16	29.14	19.48	14.83	5.37	10.25	3.8	17.87
TRINITY_DN44243_c0_g4	K13264	EC:2.3.1.115	-2.49503	down	PMAT1	phenolic glucoside malonyltransferase 1 [Populus trichocarpa]	5.24	14.66	5.77	10.2	16.67	12.16	125.28	151.24	40.68	57.67	20.63	52.22	10.78	74.62
TRINITY_DN44253_c1_g2	K13356	EC:1.2.1.84	-1.79172	down	STR9	rhodanese-like domain-containing protein 9, chloroplastic [Ricinus communis]	2.79	3.41	2.91	2.04	8.3	4.22	17.6	17.9	16.17	19.8	17.02	17.9	3.94	17.73
TRINITY_DN44261_c0_g2	K03857	EC:2.4.1.198	4.22376	up	-	uncharacterized protein LOC110642335 isoform X1 [Hevea brasiliensis]	11.91	17.43	15.23	14.96	25.01	26.69	0.88	1.11	0.37	2.23	1.59	1.66	18.54	1.31
TRINITY_DN44261_c1_g1	K02183	-	1.11168	up	CAM-1	unnamed protein product [Brassica rapa]	381.2	515.39	278.93	484.76	361.24	410.01	184.1	191.83	254.86	269.73	326.88	289.21	405.25	252.77
TRINITY_DN44261_c1_g5	K02183	-	1.39806	up	CAM2	PREDICTED: calmodulin-7 [Capsicum annuum]	0.22	0.41	0.46	0.36	0.48	0.47	0.18	0.09	0.11	0.06	0.22	0.51	0.4	0.19
TRINITY_DN44261_c1_g7	K02183	-	4.47851	up	CALM	unknown [Zea mays]	0	0.24	1.9	2.48	2.4	2	0	0	0.05	0.09	0.23	0.14	1.5	0.09
TRINITY_DN44262_c1_g10	K00855	EC:2.7.1.19	-1.97313	down	-	PREDICTED: phosphoribulokinase, chloroplastic [Theobroma cacao]	29.09	27.52	25.62	32.44	76.21	53.36	272.71	246.45	210.26	186.47	156.1	186.54	40.71	209.75
TRINITY_DN44262_c1_g8	K00855	EC:2.7.1.19	2.49308	up	-	PREDICTED: phosphoribulokinase, chloroplastic-like [Nelumbo nucifera]	0.23	0.39	0.44	0.54	0.43	0.37	0.11	0.15	0.03	0	0.12	0.08	0.4	0.08
TRINITY_DN44263_c0_g3	K01724	EC:4.2.1.96	-1.16267	down	MCA0497	uncharacterized protein LOC110601097 isoform X2 [Manihot esculenta]	7.42	8.44	7.78	6.55	7.43	7.02	22.34	24.46	20.29	21.74	18.6	19.9	7.44	21.22
TRINITY_DN44266_c0_g2	K13463	-	-1.99074	down	COI2	coronatine-insensitive protein 1 [Herrania umbratica]	7.44	12.63	1.98	6.86	4.86	5.21	39.45	39.69	22.22	37.52	27.47	26.85	6.5	32.2
TRINITY_DN44269_c2_g6	K09843	EC:1.14.13.93	2.88638	up	CYP707A2	PREDICTED: abscisic acid 8'-hydroxylase 2-like [Populus euphratica]	0.48	11.22	4.12	12.34	46.62	14.65	2.46	4.69	0.68	3.5	1.9	2.21	14.91	2.57
TRINITY_DN44271_c0_g1	K12448	EC:5.1.3.5	2.13629	up	UEL-3	probable UDP-arabinose 4-epimerase 3 [Ananas comosus]	10.06	11.92	11.48	13.98	11.65	10.72	4.65	3.15	3.45	4.38	2.01	3.63	11.63	3.54
TRINITY_DN44274_c0_g1	K12823	EC:3.6.4.13	1.78638	up	-	hypothetical protein C5167_023392 [Papaver somniferum]	131.57	205.4	98.65	180.31	117.81	121.42	64.01	58.77	48.99	45.56	36.75	37.59	142.53	48.61
TRINITY_DN44275_c0_g1	K15397	EC:2.3.1.199	2.44856	up	KCS11	3-ketoacyl-CoA synthase 11 [Hevea brasiliensis]	166.69	43.54	127.77	68.43	63.71	80.35	22.05	23.98	47.79	42.6	58.8	45.64	91.75	40.14
TRINITY_DN44283_c1_g1	K19366	-	-1.58277	down	P85	senescence/dehydration-associated protein At4g35985, chloroplastic [Ricinus communis]	0.68	1.27	1.19	2.28	1.8	0.61	6.39	4.51	5.05	4.75	4.58	5.01	1.3	5.05
TRINITY_DN44287_c0_g1	K04382	EC:3.1.3.16	1.82137	up	-	PREDICTED: serine/threonine-protein phosphatase PP2A-4 catalytic subunit [Populus euphratica]	83.96	133.89	72.85	98.35	79.09	82.65	30.71	36.02	33.59	39.68	31.85	31.79	91.8	33.94
TRINITY_DN44291_c1_g5	K14548	-	3.11003	up	-	uncharacterized protein LOC110417218 [Herrania umbratica]	1.13	12.69	1.32	2.88	5.27	4.97	0.21	0.31	0.57	0.65	1.08	1.18	4.71	0.67
TRINITY_DN44295_c0_g4	K01785	EC:5.1.3.3	-1.74401	down	-	PREDICTED: aldose 1-epimerase [Eucalyptus grandis]	2.29	1.28	1.35	0.19	1.03	0.41	4.82	4.52	5.01	6.98	3.49	3.07	1.09	4.65
TRINITY_DN44296_c0_g1	K01191	EC:3.2.1.24	2.56237	up	At5g66150	alpha-mannosidase-like isoform X1 [Hevea brasiliensis]	1.93	3.09	8.3	6.2	4.97	2.13	0.83	0.88	1.24	0.95	0.74	1.32	4.44	0.99
TRINITY_DN44298_c1_g1	K14313	-	3.08543	up	POPTRDRAFT_553757	CASP-like protein 3A1 [Hevea brasiliensis]	4.2	2.01	2.61	1.53	3.61	3.96	0	0	0.56	0.74	0.16	0.96	2.99	0.4
TRINITY_DN44298_c2_g1	K09517	-	1.39847	up	ERDJ3B	dnaJ protein ERDJ3B [Ricinus communis]	52.83	93.36	31.38	83.49	69.32	57.51	15.1	22.05	42.62	25.08	45.69	39.88	64.65	31.74
TRINITY_DN44298_c2_g2	K09517	-	-2.34835	down	ERDJ3B	dnaJ protein ERDJ3B [Jatropha curcas]	0.58	0.4	0.37	0.6	0.7	0.18	1.77	1.94	3.69	1.67	4.07	6.98	0.47	3.35
TRINITY_DN44309_c0_g10	K02692	-	-3.17598	down	psaD	PREDICTED: photosystem I reaction center subunit II, chloroplastic [Nelumbo nucifera]	72.7	95.19	48.91	103.69	209.01	137.17	1750.75	1361.95	1257.71	1272.9	899.01	1235.46	111.11	1296.3
TRINITY_DN44309_c0_g3	K02692	-	2.28584	up	psaD	PREDICTED: photosystem I reaction center subunit II, chloroplastic [Nicotiana tomentosiformis]	2.44	2.74	11.07	1.9	5.58	0.63	2.28	0.85	0.32	1.21	2	0.72	4.06	1.23
TRINITY_DN44309_c0_g7	K02692	-	-1.46079	down	psaD	photosystem I reaction center subunit II, chloroplastic [Populus trichocarpa]	145.3	211.22	223.12	255.77	494.83	356.03	1071.51	950.08	1009.53	1114.89	830.16	1112.31	281.05	1014.75
TRINITY_DN44310_c0_g2	K16040	EC:2.1.1.240	1.80014	up	ROMT	Hydroxyindole-O-methyltransferase [Handroanthus impetiginosus]	5.8	5.9	3.35	8.07	4.24	5.87	0	1.82	0.29	0.27	4.66	4.93	5.54	1.99
TRINITY_DN44313_c0_g2	K01610	EC:4.1.1.49	2.56552	up	PCKA	phosphoenolpyruvate carboxykinase (ATP)-like [Herrania umbratica]	3.48	0.9	2	0.6	3.17	1.55	0.3	0.44	0.58	0.14	0.58	0.7	1.95	0.46
TRINITY_DN44314_c0_g1	K00430	EC:1.11.1.7	2.24534	up	PER11	peroxidase 11-like [Manihot esculenta]	0.46	0.39	2.97	0.66	0.43	0.72	0.04	0.46	0.15	0.18	0.11	0.66	0.94	0.27
TRINITY_DN44314_c0_g7	K00430	EC:1.11.1.7	-1.09129	down	-	uncharacterized protein LOC110616548 [Manihot esculenta]	2.95	3.89	2.25	3.12	4.1	2.87	9.4	8.65	8.64	9.81	7.74	7.84	3.2	8.68
TRINITY_DN44323_c0_g1	K03033	-	6.38189	up	21D7	putative 26S proteasome regulatory subunit S3 [Zostera marina]	56.05	48.06	47.65	30.27	28.23	17.95	0.53	0.4	0.8	0.38	0.6	0.39	38.03	0.52
TRINITY_DN44323_c0_g4	K16221	-	1.10644	up	TCP9	TCP1 [Passiflora morifolia]	4.33	4.49	4.46	7.97	3.47	7.37	1.1	1.3	3.68	1.45	8	4.84	5.35	3.4
TRINITY_DN44323_c0_g8	K03033	-	1.98816	up	21D7	probable 26S proteasome non-ATPase regulatory subunit 3 [Coffea arabica]	51.03	115.57	47.73	122.22	63.24	92.96	17.17	20.8	27.31	31.25	27.32	39.9	82.12	27.29
TRINITY_DN44335_c2_g3	K08099	EC:3.1.1.14	-1.94853	down	CLH2	PREDICTED: chlorophyllase-2, chloroplastic [Populus euphratica]	11.69	15.9	7.01	12.49	16.48	12.26	62.63	70.42	58.73	62.33	58.05	63.33	12.64	62.58
TRINITY_DN44338_c0_g6	K19720	-	2.22125	up	CIA2	protein CHLOROPLAST IMPORT APPARATUS 2-like [Sesamum indicum]	0.44	0.25	0.55	0.8	0.66	0.21	0.12	0.05	0.02	0	0.3	0.28	0.49	0.13
TRINITY_DN44345_c0_g4	K02267	-	4.97094	up	At1g32710	cytochrome c oxidase subunit 6b-3-like [Ziziphus jujuba]	13.21	14.92	6.29	16.29	15.13	16	0	0	0.6	0	1.81	0.58	13.64	0.5
TRINITY_DN44348_c1_g1	K01535	EC:3.6.3.6	4.31003	up	PMA4	Plasma membrane ATPase, partial [Cajanus cajan]	175.2	83.26	66.6	75.48	47.61	127.43	5.39	7.42	10.73	7.84	7.27	11.24	95.93	8.31
TRINITY_DN44349_c3_g1	K07178	EC:2.7.11.1	1.79499	up	-	uncharacterized protein LOC110619030 isoform X2 [Manihot esculenta]	30.08	46.65	20.05	49.51	27.67	29.27	8.65	9.19	14.2	13.71	14.06	17.25	33.87	12.84
TRINITY_DN44350_c0_g11	K13434	-	-2.43262	down	PTI6	hypothetical protein JCGZ_17289 [Jatropha curcas]	10.65	16.36	2.49	6.65	7.6	10.72	117.59	102.67	24.45	71.42	14.78	30.2	9.08	60.18
TRINITY_DN44353_c1_g2	K13347	-	-2.81062	down	PMP22	peroxisomal membrane protein PMP22 isoform X1 [Solanum lycopersicum]	6.61	6.09	7.45	7.96	6.48	4.05	43.34	35.47	28.03	32.36	24.91	28.27	6.44	32.06
TRINITY_DN44354_c1_g3	K13993	-	2.9391	up	HSP18.1	17.3 kDa class I heat shock protein [Manihot esculenta]	18.65	12.16	3.81	8.74	7.91	9.74	0.82	2.2	2.05	1.31	1.44	2.18	10.17	1.67
TRINITY_DN44356_c1_g5	K01623	EC:4.1.2.13	7.21769	up	-	PREDICTED: fructose-bisphosphate aldolase 1, chloroplastic-like [Nicotiana sylvestris]	0	0	5.98	0	2.89	0	0	0	0	0	0	0	1.48	0
TRINITY_DN44363_c0_g3	K14492	-	7.19918	up	ARR17	PREDICTED: two-component response regulator ARR17-like [Populus euphratica]	3.46	0.81	9.25	4.8	7.68	5.9	0.07	0.15	0	0	0	0	5.32	0.04
TRINITY_DN44367_c0_g9	K01681	EC:4.2.1.3	-2.67095	down	PVA42	vesicle-associated protein 4-1 [Jatropha curcas]	0.25	0	0.08	0.09	0.31	0.17	0.52	1.45	0.5	1.83	2.21	1.55	0.15	1.34
TRINITY_DN44368_c1_g3	K13430	EC:2.7.11.1	5.9025	up	PBL26	Serine/threonine-protein kinase [Morus notabilis]	2.39	2.03	3.44	3.92	4.1	2.77	0	0	0	0	0	0.29	3.11	0.05
TRINITY_DN44368_c2_g6	K13448	-	1.37308	up	CML29	probable calcium-binding protein CML29 [Sesamum indicum]	0.02	0.17	0.22	0.21	0.2	0.48	0.05	0.01	0.07	0.11	0.16	0.25	0.22	0.11
TRINITY_DN44375_c0_g1	K00232	EC:1.3.3.6	1.14149	up	-	uncharacterized protein LOC7487249 [Populus trichocarpa]	16.84	23.67	11.43	20.37	13.94	15.05	8.61	11.37	11.28	8.8	9.22	15.44	16.88	10.79
TRINITY_DN44380_c0_g1	K00264	EC:1.4.1.13 1.4.1.14	4.02841	up	GLT1	glutamate synthase [NADH], amyloplastic isoform X1 [Populus trichocarpa]	172.68	371.23	367.88	365.06	278.1	177.64	24.39	24.74	17.11	17.32	15.62	14.16	288.77	18.89
TRINITY_DN44383_c0_g1	K05740	-	2.19956	up	FH5	formin-like protein 5 isoform X1 [Populus trichocarpa]	59.3	72.62	61.72	64.25	45.74	55.44	10.23	11.74	21.8	14.74	21.54	19.36	59.84	16.57
TRINITY_DN44389_c0_g4	K13459	-	-1.81455	down	-	probable disease resistance protein At5g63020 [Manihot esculenta]	1.33	1.97	0.18	0.39	1.36	0.36	3.28	4.17	4.55	5.25	3.79	4.79	0.93	4.3
TRINITY_DN44389_c0_g5	K13459	-	-1.35609	down	-	hypothetical protein CISIN_1g039262mg [Citrus sinensis]	1.36	2.4	0.4	1.56	1.59	1.07	7.03	6.74	6.85	7.03	2.83	5.42	1.4	5.98
TRINITY_DN44401_c0_g1	K02717	-	2.18464	up	PSBP	hypothetical protein CDL12_06931 [Handroanthus impetiginosus]	2.97	3.22	7.29	7.09	5.21	6.28	2.09	1.35	0.39	0.24	2.25	2.57	5.34	1.48
TRINITY_DN44401_c0_g2	K02717	-	2.3306	up	PSBP1	hypothetical protein CDL12_09890 [Handroanthus impetiginosus]	1.2	0.71	1.97	2.03	1.31	1.32	0.26	0.39	0.03	0.03	0.72	0.78	1.42	0.37
TRINITY_DN44401_c0_g3	K02717	-	-3.11801	down	PSBP1	evolving complex protein 2 precursor [Populus tomentosa]	65.37	151.62	90.68	165.84	353.9	187.08	2619.72	1977.17	1865.05	1942.94	1342.01	1688.78	169.08	1905.94
TRINITY_DN44401_c0_g6	K02717	-	7.71835	up	PSBP2	chloroplast PsbP1 precursor [Nicotiana benthamiana]	0	0	5.39	0	2.98	0	0	0	0	0	0	0	1.39	0
TRINITY_DN44405_c1_g2	K00145	EC:1.2.1.38	1.70322	up	At1g06800	phospholipase A1-Igamma1, chloroplastic-like [Manihot esculenta]	14.76	11.85	9.34	11.48	7.38	10.59	4.58	3.58	3.07	5.24	3.95	4.03	10.9	4.08
TRINITY_DN44405_c1_g3	K16818	EC:3.1.1.32	4.12802	up	At1g06800	phospholipase A1-Igamma1, chloroplastic-like [Hevea brasiliensis]	23.16	25.83	45.86	30.33	30.24	19.49	1.31	1.31	3.06	2.19	3.18	2.43	29.15	2.25
TRINITY_DN44406_c0_g1	K05929	EC:2.1.1.103	1.26971	up	PEAMT	phosphoethanolamine N-methyltransferase-like isoform X2 [Sesamum indicum]	6.28	7.15	8.82	6.49	15.21	11.22	9.08	4.57	5.67	7.68	8.02	6.03	9.2	6.84
TRINITY_DN44411_c0_g1	K14492	-	1.60808	up	ARR5	two-component response regulator ARR5 isoform X1 [Populus trichocarpa]	39.89	22.88	26.77	30.05	23.03	22.38	13.12	17.36	8.23	17.92	10.64	8.26	27.5	12.59
TRINITY_DN44415_c0_g2	K02986	-	5.24668	up	INVA	PREDICTED: alkaline/neutral invertase A, mitochondrial-like [Cucumis melo]	305.81	271.79	248.08	333.56	174.2	187.12	7.53	4.34	14.06	6.78	10.35	11.12	253.43	9.03
TRINITY_DN44423_c0_g3	K00679	EC:2.3.1.158	-1.36885	down	APG	GDSL esterase/lipase APG [Ricinus communis]	14.21	6	15.33	5.23	9.01	8.35	31.4	39.75	23.47	34.75	24.32	44.9	9.69	33.1
TRINITY_DN44423_c0_g4	K00679	EC:2.3.1.158	-1.60298	down	APG	GDSL esterase/lipase APG [Ricinus communis]	0.34	0.69	3.47	1.75	7.42	3.73	2.26	10.58	1.8	10.15	0.75	9.58	2.9	5.85
TRINITY_DN44426_c0_g1	K00852	EC:2.7.1.15	-1.88627	down	rbsK	uncharacterized protein LOC110601264 [Manihot esculenta]	5.79	4.32	4.53	3.98	8.34	5.35	27.1	24.95	24.22	23.62	23.99	25.51	5.39	24.9
TRINITY_DN44428_c2_g3	K13448	-	5.0998	up	CML11	PREDICTED: calmodulin-like protein 11 [Pyrus x bretschneideri]	116.13	76.74	179.89	77.5	139.94	109.88	0.46	1.14	8.92	1.3	3.6	10.44	116.68	4.31
TRINITY_DN44458_c0_g1	K01513	EC:3.1.4.1 3.6.1.9	-1.0187	down	-	uncharacterized protein LOC105642861 [Jatropha curcas]	7.85	18.02	5.16	4.83	6.43	8.75	20.41	27.63	23.87	20.04	20.77	19.08	8.51	21.97
TRINITY_DN44461_c0_g1	K04079	-	1.56526	up	HSP90-1	PREDICTED: heat shock protein 83 [Eucalyptus grandis]	13.48	14.52	14.94	15.23	18.1	17.37	1.32	2.6	7.69	6.66	6.58	3.6	15.61	4.74
TRINITY_DN44464_c1_g1	K02115	-	-1.14883	down	ATPC	ATP synthase gamma chain, chloroplastic [Manihot esculenta]	44.89	68.36	38.92	70.83	215.27	136.29	354.41	336.49	236.73	311.98	145.61	251.32	95.76	272.76
TRINITY_DN44472_c2_g4	K02872	-	1.7904	up	RPL13AB	60S ribosomal protein L13a-4 [Cajanus cajan]	35.01	48.98	18.63	47.38	40.5	45.94	9.63	15.87	17.6	13.68	12.89	12.12	39.41	13.63
TRINITY_DN44478_c3_g4	K03869	-	1.1199	up	CUL3B	hypothetical protein GW17_00008894 [Ensete ventricosum]	13.22	14.5	4.09	13.47	6.28	5.84	5.03	5.74	3.95	5.11	4.34	5.7	9.57	4.98
TRINITY_DN44482_c1_g3	K14494	-	-1.29918	down	SCL6	scarecrow-like protein 6 isoform X1 [Populus trichocarpa]	3.89	4	2.17	3.14	3.5	3.69	8.74	13.84	9.3	12.36	8.09	11.85	3.4	10.7
TRINITY_DN44483_c1_g2	K13379	EC:2.4.1.- 5.4.99.30	2.34214	up	UPTG1	UDP-arabinopyranose mutase 1 [Manihot esculenta]	9.53	9.3	6.47	10.19	8.08	12.58	2.98	2.7	2.58	3.73	2.43	5.32	9.36	3.29
TRINITY_DN44483_c2_g1	K13379	EC:2.4.1.- 5.4.99.30	1.4015	up	UAM1	UDP-arabinopyranose mutase 3 [Manihot esculenta]	10.22	9.78	9.13	3.91	30.18	13.55	2.01	3.78	4.58	13.29	4.57	10.28	12.8	6.42
TRINITY_DN44484_c2_g2	K14503	-	3.95673	up	BZR2	protein BRASSINAZOLE-RESISTANT 1-like [Hevea brasiliensis]	196.16	228.08	157.75	243.99	178.95	202.74	5.68	9.17	19.38	17	26.7	23.72	201.28	16.94
TRINITY_DN44490_c1_g8	K08912	-	2.63346	up	CAB7	Chlorophyll a-b binding protein 2, chloroplastic [Dendrobium catenatum]	0.94	0.36	0.53	0.96	0.74	1	0	0.35	0	0	0.2	0.38	0.76	0.15
TRINITY_DN44492_c0_g4	K00826	EC:2.6.1.42	1.61685	up	At5g27410	hypothetical protein MIMGU_mgv1a004374mg [Erythranthe guttata]	0.59	0.7	0.51	0.73	0.61	0.66	0.21	0.09	0.2	0.04	0.2	0.91	0.63	0.27
TRINITY_DN44495_c3_g2	K01231	EC:3.2.1.114	-1.95875	down	GMII	PREDICTED: alpha-mannosidase 2 isoform X2 [Gossypium raimondii]	1.02	1.23	0.44	0.5	0.44	0.43	3.74	4.61	3.22	4.29	2.58	3.4	0.68	3.64
TRINITY_DN44497_c0_g1	K00703	EC:2.4.1.21	-1.46836	down	SS2	granule-bound starch synthase 2, chloroplastic/amyloplastic [Manihot esculenta]	11.77	12.85	18.23	13.31	15.35	18.33	59.88	62.66	50.79	50.59	58.26	54.6	14.97	56.13
TRINITY_DN44503_c0_g4	K01939	EC:6.3.4.4	1.0449	up	PURA2	adenylosuccinate synthetase 2, chloroplastic [Jatropha curcas]	40.38	48.1	16.51	31.1	53.89	41.91	24.42	23.08	23.27	24.66	24.47	22.1	38.65	23.67
TRINITY_DN44506_c3_g3	K09699	EC:2.3.1.168	-2.3297	down	MORF9	multiple organellar RNA editing factor 9, chloroplastic-like [Manihot esculenta]	14.52	21.32	11.7	19.66	35.6	26.28	149.48	144.02	134.56	130.99	103.02	135.83	21.51	132.98
TRINITY_DN44515_c1_g4	K06269	EC:3.1.3.16	1.38489	up	Os03g0268000	hypothetical protein B456_011G270800 [Gossypium raimondii]	52.37	52.79	53.52	41.93	37.15	37.75	19.15	22.88	25.1	22.99	22.69	22.51	45.92	22.55
TRINITY_DN44523_c0_g2	K13459	-	-1.71167	down	At1g61190	probable disease resistance protein At5g63020 [Manihot esculenta]	3.79	1.85	1.28	0.81	2.96	1.8	3.04	2.77	4.71	20.52	13.77	9.37	2.08	9.03
TRINITY_DN44526_c1_g2	K01695	EC:4.2.1.20	3.85066	up	TSA1	Tryptophan synthase, alpha chain [Corchorus capsularis]	5.62	5.97	12.09	6.31	12.04	3	0.29	0.14	0.98	1.34	0.42	0.95	7.5	0.69
TRINITY_DN44527_c0_g1	K00079	EC:1.1.1.184 1.1.1.189 1.1.1.197	2.78969	up	SDR1	carbonyl reductase [NADPH] 1 [Jatropha curcas]	34.03	38.3	23.42	35.43	28.03	25.61	4.74	4.67	6.64	6	5.21	6.96	30.8	5.7
TRINITY_DN44528_c0_g5	K11086	-	4.27754	up	SNRPN	snRNP [Klebsormidium nitens]	1.29	0.04	5.23	3.62	3.14	3.98	0.08	0.08	1.33	0.63	1.92	0	2.88	0.67
TRINITY_DN44535_c0_g1	K06444	EC:5.5.1.18	-3.0455	down	CRTL-E-1	lycopene epsilon cyclase, chloroplastic [Manihot esculenta]	0.55	0.5	1.59	1.06	2.91	1.64	17.18	15.86	14.59	14.65	9.7	12.73	1.38	14.12
TRINITY_DN44538_c0_g3	K12309	EC:3.2.1.23	1.21859	up	IDD7	PREDICTED: zinc finger protein NUTCRACKER-like [Populus euphratica]	18.16	24.63	10.12	25.74	15.28	12.51	10.97	13.53	5.64	13.95	7.31	6.18	17.74	9.6
TRINITY_DN44543_c1_g2	K00844	EC:2.7.1.1	-1.46594	down	-	Endo-1,3;1,4-beta-D-glucanase [Vitis vinifera]	144.29	152.84	92.46	110.93	119.38	118.69	434.62	459.3	440.6	420.71	416.56	422.62	123.1	432.4
TRINITY_DN44548_c3_g1	K00850	EC:2.7.1.11	1.82433	up	PFK7	ATP-dependent 6-phosphofructokinase 3-like [Manihot esculenta]	19.34	17.24	112.97	33.27	39.07	24.54	13.78	15.33	21	22.44	18.22	20.82	41.07	18.6
TRINITY_DN44560_c1_g1	K13448	-	1.29875	up	CML25	probable calcium-binding protein CML25 [Populus trichocarpa]	4.08	6.56	4.98	9.97	8.71	5.08	3.84	3.88	3.52	4.82	1.6	3.22	6.56	3.48
TRINITY_DN44560_c1_g4	K13448	-	-2.37697	down	CML25	probable calcium-binding protein CML25 [Populus trichocarpa]	1.01	1.31	1.82	0.4	0.58	0.99	7.63	9.53	5.05	10.53	3.78	6.01	1.02	7.09
TRINITY_DN44565_c1_g8	K14497	EC:3.1.3.16	3.7305	up	At2g29380	Highly ABA-induced PP2C gene 2 isoform 1 [Theobroma cacao]	0.83	8.76	12.67	5.45	16	9.6	0.42	1.23	0	0.39	0	3.21	8.88	0.88
TRINITY_DN44572_c1_g1	K13946	-	-2.22926	down	LAX2	auxin influx transport protein [Ochetophila trinervis]	4.73	2.07	0.7	2.79	1.99	0.94	5.55	7.69	7.48	17.82	26.42	18.65	2.2	13.94
TRINITY_DN44576_c1_g1	K13423	-	7.4011	up	WRKY75	probable WRKY transcription factor 75 [Manihot esculenta]	291.09	89.13	187.28	177.65	93.89	265.48	0.79	0.99	1.31	0.94	1.5	3.13	184.09	1.44
TRINITY_DN44577_c0_g1	K00088	EC:1.1.1.205	2.50376	up	At1g16350	inosine-5'-monophosphate dehydrogenase 2 [Manihot esculenta]	7.43	2.51	6.93	4.89	1.51	6.6	1.24	1.07	1.21	1.01	1.21	1.32	4.98	1.18
TRINITY_DN44587_c1_g2	K00288	EC:1.5.1.5 3.5.4.9 6.3.4.3	-2.08867	down	FOLD1	bifunctional protein FolD 1, mitochondrial isoform X1 [Jatropha curcas]	2.17	2.87	2.36	1.97	2.63	1.33	13.72	14.06	11.29	11.56	10.63	11.43	2.22	12.12
TRINITY_DN44588_c0_g5	K14409	-	1.83761	up	SMG7L	protein SMG7L [Sesamum indicum]	0.14	0.13	0.33	0.28	0.23	0.33	0.12	0.12	0.03	0	0.09	0.15	0.24	0.09
TRINITY_DN44602_c1_g1	K12448	EC:5.1.3.5	3.21832	up	At2g34850	hypothetical protein DVH24_032561 [Malus domestica]	217.58	263.67	228.64	261.33	180.66	159.63	19.08	20.75	42.59	17.27	71.53	24.13	218.59	32.56
TRINITY_DN44602_c2_g2	K12448	EC:5.1.3.5	3.12217	up	UEL-1	PREDICTED: UDP-arabinose 4-epimerase 1 [Beta vulgaris subsp. vulgaris]	90.96	102.76	92.69	107.85	64.95	69.45	6.79	8.99	14.22	8.42	28.8	10.85	88.11	13.01
TRINITY_DN44602_c2_g4	K12448	EC:5.1.3.5	1.53846	up	UEL-1	probable UDP-arabinose 4-epimerase 3 isoform X2 [Jatropha curcas]	6.9	5.88	9.78	7.81	5.84	6.08	0.94	4.45	3.52	4.54	3.82	2.38	7.05	3.27
TRINITY_DN44614_c3_g6	K02900	-	1.72417	up	RPL27AC	unknown [Populus trichocarpa]	25.41	32.3	14.85	21.86	21.04	29.58	6.77	6.54	10.4	12.47	10.28	10.84	24.17	9.55
TRINITY_DN44618_c0_g5	K00981	EC:2.7.7.41	1.06862	up	CDS2	uncharacterized protein A4U43_C01F4920 [Asparagus officinalis]	8.48	10.31	5.5	10.48	8.63	7.7	16.86	18.36	13.51	17.48	22.07	18.64	8.52	17.82
TRINITY_DN44621_c3_g1	K20547	EC:3.2.1.14	1.58872	up	CHI2	endochitinase-like [Manihot esculenta]	48.3	25.33	22.68	16.82	31.18	30.43	4.11	5.61	13.89	11.66	30.05	22.02	29.12	14.56
TRINITY_DN44621_c3_g3	K20547	EC:3.2.1.14	6.80436	up	-	endochitinase, partial [Ricinus communis]	68.18	23.54	89.44	31.73	45.49	32.62	0.49	0.22	0.67	1.05	0.4	0.61	48.5	0.57
TRINITY_DN44622_c0_g1	K13416	EC:2.7.10.1 2.7.11.1	-1.86794	down	BAK1	PREDICTED: LRR receptor-like serine/threonine-protein kinase GSO2 [Populus euphratica]	2.43	3.27	0.72	1.75	3.55	1.77	11.54	10.41	7.44	11.17	10.14	10.95	2.25	10.28
TRINITY_DN44627_c0_g1	K04713	EC:1.14.18.5	4.04738	up	SBH1	sphinganine C4-monooxygenase 1-like [Hevea brasiliensis]	248.64	240.82	281.27	290.74	198.22	213.43	14.04	14.3	24.81	17.6	18.02	26.47	245.52	19.21
TRINITY_DN44629_c1_g5	K16063	-	1.81665	up	SIZ1	SAP domain-containing protein/zf-MIZ domain-containing protein [Cephalotus follicularis]	6.55	6	2.21	4.77	3.64	1.65	6.7	1.98	3.8	3.64	2.8	2.23	4.14	3.53
TRINITY_DN44631_c2_g1	K13993	-	2.23602	up	RTM2	inactive protein RESTRICTED TEV MOVEMENT 2 [Ricinus communis]	21.19	5.33	9.53	4.98	9.27	5.62	1.25	0.42	2.66	3.46	2.34	2.51	9.32	2.11
TRINITY_DN44632_c0_g2	K01792	EC:5.1.3.15	1.8442	up	-	putative glucose-6-phosphate 1-epimerase [Sesamum indicum]	0.34	0.53	0.61	0.47	0.83	0.5	0.09	0.29	0.04	0.04	0.74	0.21	0.55	0.23
TRINITY_DN44646_c3_g11	K03005	-	2.84786	up	-	DNA-directed RNA polymerase I subunit rpa49 [Manihot esculenta]	13.07	21.77	63.86	50.73	23.43	36.17	6.73	8.08	0.73	6.2	4.4	12.59	34.84	6.46
TRINITY_DN44651_c1_g1	K05573	EC:1.6.5.3	-2.7647	down	-	protein transport protein sft2-like isoform X2 [Hevea brasiliensis]	0.44	1.71	0.96	1.24	0.55	0.94	4.66	3.77	6.36	11.26	9.11	6.6	0.97	6.96
TRINITY_DN44662_c1_g3	K02872	-	1.20679	up	Rpl13a	60S ribosomal protein L13a-1 [Glycine soja]	0.61	2.83	4.59	4.1	4.45	4.77	1.12	0.86	2.29	1.92	2.59	3.52	3.56	2.05
TRINITY_DN44662_c1_g6	K02872	-	1.27844	up	RPL13AB	hypothetical protein DM860_012028 [Cuscuta australis]	76.06	99.69	45.05	75.94	79.5	82.57	38.14	38.16	45.45	37.62	38.89	40.5	76.47	39.79
TRINITY_DN44687_c1_g2	K01623	EC:4.1.2.13	6.58997	up	ALDP	PREDICTED: fructose-bisphosphate aldolase 1, chloroplastic-like [Nicotiana tabacum]	0	0	5.43	0.14	3.4	0	0	0	0	0	0	0	1.49	0
TRINITY_DN44696_c3_g1	K03231	-	1.53807	up	RBP47	polyadenylate-binding protein RBP47-like [Hevea brasiliensis]	9.37	19.51	25.06	25.97	24.07	12.7	5.88	5.67	10.92	9.82	10.89	10.2	19.45	8.9
TRINITY_DN44696_c3_g2	K03231	-	-1.07209	down	RBP47B	polyadenylate-binding protein RBP47-like [Hevea brasiliensis]	22.34	26.98	28.57	27.8	22.15	13.89	76.81	67.22	64.3	67.37	56.27	56.28	23.62	64.71
TRINITY_DN44705_c0_g2	K13354	-	4.22053	up	PNC1	peroxisomal adenine nucleotide carrier 1-like [Hevea brasiliensis]	35.83	41.48	58.94	48.87	24.06	39	1.91	1.97	2.95	3.56	2.26	4.7	41.36	2.89
TRINITY_DN44712_c1_g2	K12449	-	-3.57278	down	AXS2	UDP-D-apiose/UDP-D-xylose synthase 2-like [Cucurbita moschata]	0.15	0	0.07	0.04	0.07	0.07	0.11	0.11	0.33	0.95	3.44	1.8	0.07	1.12
TRINITY_DN44714_c1_g1	K13424	-	3.05182	up	WRKY24	WRKY transcription factor WRKY24-like isoform X2 [Abrus precatorius]	799.16	415.35	693.66	667.04	482.84	611.45	11.03	14.08	103.3	119.41	193.27	165.46	611.58	101.09
TRINITY_DN44714_c5_g2	K08506	-	-1.15006	down	NAC056	NAC domain-containing protein 2-like [Hevea brasiliensis]	0.37	0.44	1.57	0.73	0.78	0.23	3.01	2.06	1.28	1.51	1.96	2.2	0.69	2
TRINITY_DN44714_c5_g9	K18835	-	-2.11655	down	-	probable WRKY transcription factor 2 [Hevea brasiliensis]	0.21	0.64	0.58	0	0.74	0.59	2.46	4.31	1.03	3.73	2.88	2.2	0.46	2.77
TRINITY_DN44717_c1_g1	K03127	-	1.83716	up	TAF13	transcription initiation factor TFIID subunit 13 [Ricinus communis]	26.69	36.8	23.83	35.56	31.88	32.47	9.42	11.44	12.8	12.09	11.6	12.39	31.2	11.62
TRINITY_DN44717_c1_g2	K03260	-	1.22291	up	EIF(ISO)4G1	eukaryotic translation initiation factor-like [Hevea brasiliensis]	63.83	94.81	32.21	76.27	58.08	78.44	40.7	39.8	33.26	45.51	35.09	34.65	67.27	38.17
TRINITY_DN44720_c2_g3	K01148	EC:3.1.13.4	-1.85754	down	At3g25440	uncharacterized CRM domain-containing protein At3g25440, chloroplastic [Populus trichocarpa]	0.67	0.68	0.66	0.46	0.95	0.53	4.49	4.05	2.56	3.79	2.06	2.24	0.66	3.2
TRINITY_DN44721_c0_g2	K12608	-	-1.19997	down	ABCI20	PREDICTED: ABC transporter I family member 20 [Tarenaya hassleriana]	1.4	1.65	0.54	1.5	1.41	0.42	2.98	3.69	3.05	2.43	5.03	3.72	1.15	3.48
TRINITY_DN44732_c0_g2	K13464	-	5.96733	up	TIFY10B	protein TIFY 10A-like [Manihot esculenta]	189.38	35.1	239.71	135.78	75.21	204.45	1.09	0.85	3.43	1.84	5.78	6.87	146.61	3.31
TRINITY_DN44732_c3_g3	K13519	EC:2.3.1.51 2.3.1.23 2.3.1.-	-1.09002	down	LPLAT2	lysophospholipid acyltransferase 1 [Hevea brasiliensis]	8.35	11.7	10.35	14.75	12.24	8.73	26.76	37.13	28.45	30.58	27.29	39.48	11.02	31.61
TRINITY_DN44733_c0_g3	K13126	-	7.44979	up	NAC92	NAC domain-containing protein 100-like [Hevea brasiliensis]	16.18	10.35	30.26	14.69	15.78	28.15	0.07	0.07	0.27	0.16	0.17	0.07	19.23	0.14
TRINITY_DN44734_c2_g2	K04079	-	1.87193	up	Hsp90b1	predicted protein [Hordeum vulgare subsp. vulgare]	0.89	0.71	2.61	2.1	2.48	2.25	0.71	0.81	0.39	1.05	0.39	0.78	1.84	0.69
TRINITY_DN44736_c0_g1	K00942	EC:2.7.4.8	-1.62245	down	GK3	hypothetical protein MANES_03G186400 [Manihot esculenta]	3.05	5.24	1.85	4.99	4.02	3.31	14.23	14.51	15.73	14.89	10.86	14.3	3.74	14.09
TRINITY_DN44739_c0_g1	K00901	EC:2.7.1.107	-2.15768	down	DGK5	Diacylglycerol kinase [Macleaya cordata]	0	0.13	0.35	0.55	0.9	0.37	2.02	2.25	1.6	2.34	1.7	5.22	0.38	2.52
TRINITY_DN44747_c1_g3	K03364	-	2.2349	up	FZR3	protein FIZZY-RELATED 3 [Hevea brasiliensis]	22.65	19.29	13.67	17.71	15.71	14.51	5.74	6.21	3.78	4.25	3.67	3.27	17.26	4.49
TRINITY_DN44751_c0_g1	K20772	EC:4.4.1.14	6.73664	up	ACS1	1-aminocyclopropane-1-carboxylate synthase-like [Manihot esculenta]	16.17	0.31	12.45	0.97	2.65	13.22	0.08	0	0.08	0.16	0.14	0.16	7.63	0.1
TRINITY_DN44753_c0_g6	K16903	EC:2.6.1.99	4.16118	up	-	trithorax group protein osa-like [Hevea brasiliensis]	305.06	277.95	453.99	429.19	267.7	286.16	7.29	13.1	30.03	21.5	44.99	37.32	336.68	25.7
TRINITY_DN44759_c1_g2	K07513	EC:2.3.1.16	4.96453	up	PED1	PREDICTED: 3-ketoacyl-CoA thiolase 2, peroxisomal-like [Populus euphratica]	113.39	23.99	226.32	36.58	39.2	67.74	0.42	1.86	5.19	2.02	6	7.42	84.54	3.82
TRINITY_DN44762_c2_g3	K14486	-	-1.87074	down	ARF6	auxin response factor 6-like isoform X1 [Manihot esculenta]	4.15	1.89	8.25	2	5.24	2.15	21.57	22.27	28.8	67.13	30.92	32	3.95	33.78
TRINITY_DN44764_c1_g4	K02894	-	1.06311	up	RPL23A	hypothetical protein B296_00050676, partial [Ensete ventricosum]	26.89	35.07	8.59	37.8	25.48	17.52	10.52	11.22	15.64	20.94	21.71	16.02	25.22	16.01
TRINITY_DN44765_c0_g2	K12825	-	-1.87318	down	-	uncharacterized protein LOC110631039 [Manihot esculenta]	9.12	15.68	9.34	11.53	22.38	13.56	72.56	70.89	61.11	63.28	48.19	63.35	13.6	63.23
TRINITY_DN44774_c0_g5	K14496	-	-1.72606	down	PYL1	abscisic acid receptor PYL1 [Hevea brasiliensis]	0.6	1.23	0.83	0.23	0.92	0.49	3.09	4.07	3.04	4.09	1.59	2.99	0.72	3.14
TRINITY_DN44781_c0_g11	K01507	EC:3.6.1.1	-1.33106	down	-	unknown [Populus trichocarpa]	117.77	104.21	123.52	84.57	188.37	123.59	442.48	480.19	383.74	485.89	293.88	361.22	123.67	407.9
TRINITY_DN44783_c0_g3	K13126	-	1.1775	up	NAC100	NAC domain-containing protein 100-like [Hevea brasiliensis]	3.43	19.85	3.07	10.32	5.46	12.53	1.58	2.78	5.27	5.5	13.01	6.21	9.11	5.73
TRINITY_DN44789_c0_g1	K03265	-	-2.00866	down	ERF1-2	eukaryotic peptide chain release factor subunit 1-3 isoform X1 [Ziziphus jujuba]	3.66	5.31	4.99	4.34	9.82	4.8	28.33	31.23	26.66	34.98	23.25	27.84	5.49	28.71
TRINITY_DN44793_c3_g1	K01255	EC:3.4.11.1	2.41991	up	CYCU2-2	cyclin-U2-2 [Populus trichocarpa]	0.58	0.72	1.82	2.11	8.43	1.52	0.18	0.52	0.34	0.88	0.46	1.34	2.53	0.62
TRINITY_DN44806_c2_g2	K17744	EC:1.1.1.316	-1.79292	down	KAB1	probable voltage-gated potassium channel subunit beta [Manihot esculenta]	4.95	5.05	5.28	4.36	3.74	4.93	14.48	18.42	21.31	20.31	27	25.83	4.72	21.23
TRINITY_DN44807_c1_g1	K12896	-	1.66193	up	RS2Z33	serine/arginine-rich splicing factor RS2Z32-like [Sesamum indicum]	0.38	0.55	0.68	0.36	0.87	0.75	0.12	0.17	0.14	0.02	0.2	0.49	0.6	0.19
TRINITY_DN44811_c2_g2	K13416	EC:2.7.10.1 2.7.11.1	1.19765	up	BAK1	BRASSINOSTEROID INSENSITIVE 1-associated receptor kinase 1-like [Hevea brasiliensis]	46.83	48.1	50.74	42.22	47.65	39.48	20.38	21.97	45.42	21.14	26.45	25.69	45.84	26.84
TRINITY_DN44815_c0_g1	K13035	EC:3.5.5.4 4.2.1.65	-1.62162	down	NIT4B	PREDICTED: bifunctional nitrilase/nitrile hydratase NIT4B-like [Juglans regia]	0.41	0.39	0.66	0.32	0.75	0.33	2.78	3.49	1.07	2.1	1.1	0.85	0.48	1.9
TRINITY_DN44816_c1_g2	K04392	-	-1.13632	down	RAC1	rac-like GTP-binding protein RAC1 [Ricinus communis]	23.25	25.51	30.73	22.55	38.58	23.57	97.99	96.21	82.69	69.3	58.57	79.6	27.36	80.73
TRINITY_DN44819_c4_g8	K06125	EC:2.5.1.39	-1.59361	down	PPT1	hypothetical protein MANES_01G040600 [Manihot esculenta]	6.53	5.93	7.83	4.99	6.68	5.35	22.4	22.56	26.19	26.75	25.88	23.75	6.22	24.59
TRINITY_DN44831_c0_g3	K20783	EC:2.4.2.-	-1.3864	down	RRA3	arabinosyltransferase RRA3 [Ricinus communis]	4.1	4.44	1.63	1.59	5.37	4.27	8.66	9.93	11.95	13.83	11.53	15.55	3.57	11.91
TRINITY_DN44832_c1_g1	K03094	-	6.29224	up	JUB1	PREDICTED: transcription factor JUNGBRUNNEN 1 isoform X2 [Populus euphratica]	266.85	125.73	354.3	79.55	166.89	116.11	1.2	1.53	5.41	2.21	4.02	4.48	184.91	3.14
TRINITY_DN44832_c1_g2	K03094	-	2.60797	up	JUB1	transcription factor JUNGBRUNNEN 1-like [Hevea brasiliensis]	1.29	0.67	2.71	0.22	0.38	0.34	0.18	0.14	0.27	0.13	0.07	0.39	0.93	0.2
TRINITY_DN44832_c1_g3	K03094	-	5.63758	up	JUB1	transcription factor JUNGBRUNNEN 1-like [Manihot esculenta]	180.99	90.18	215.78	95.16	100.82	83.74	1.65	2.01	4.55	2.21	2.87	7.29	127.78	3.43
TRINITY_DN44834_c1_g2	K13412	EC:2.7.11.1	1.13232	up	CPK2	PREDICTED: calcium-dependent protein kinase 26-like [Populus euphratica]	6.59	5.82	7.31	5.07	4.23	7.69	1.5	1.88	4.97	2.26	2.99	5.65	6.12	3.21
TRINITY_DN44834_c1_g4	K13412	EC:2.7.11.1	-1.9453	down	CPK1	calcium-dependent protein kinase 1 [Morus notabilis]	10.62	14.76	8.5	6.76	9.77	8.35	24.82	29.53	56.04	37.85	48.51	54.91	9.79	41.94
TRINITY_DN44845_c1_g1	K05658	EC:3.6.3.44	-2.79508	down	ABCI17	ABC transporter I family member 17-like [Manihot esculenta]	0.72	0.88	0.87	1.22	1.35	0.8	12.11	10.23	7.84	8.59	5.7	7.05	0.97	8.59
TRINITY_DN44849_c3_g2	K01783	EC:5.1.3.1	1.99142	up	-	ribulose-phosphate 3-epimerase, chloroplastic [Sesamum indicum]	0.52	0.24	0.77	0.67	0.51	0.34	0.29	0.12	0.1	0.06	0.05	0.39	0.51	0.17
TRINITY_DN44851_c0_g2	K13459	-	-3.5836	down	-	hypothetical protein MANES_S087000 [Manihot esculenta]	0.52	0.38	0.85	0.4	0.6	1.39	11.42	13.98	4.24	11.89	6.8	6.24	0.69	9.1
TRINITY_DN44864_c0_g1	K12581	-	-1.77569	down	TIC32	dehydrogenase/reductase SDR family member on chromosome X-like isoform X6 [Hevea brasiliensis]	3.68	3.97	4.67	4.89	5.97	3.31	23.78	21.02	21.31	28.3	12.86	21.48	4.42	21.46
TRINITY_DN44867_c3_g1	K13811	EC:2.7.7.4 2.7.1.25	3.864	up	APS1	ATP sulfurylase 1, chloroplastic-like [Hevea brasiliensis]	62.83	35.97	24.85	26.06	7.53	39.19	20.35	20.89	12.1	8.72	8.15	9.05	32.74	13.21
TRINITY_DN44869_c0_g7	K13065	EC:2.3.1.133	2.27235	up	SALAT	vinorine synthase-like [Manihot esculenta]	39.05	11.23	16.97	7.31	23.44	11.85	2.85	2.9	8.4	4.23	2.8	8.77	18.31	4.99
TRINITY_DN44875_c0_g3	K02267	-	1.16753	up	COX6B-1	Cytochrome C oxidase polypeptide vib, putative [Theobroma cacao]	97.3	124.82	51.34	87.13	75.22	79.1	49.02	42.66	57.26	48.53	46.02	48.82	85.82	48.72
TRINITY_DN44876_c0_g2	K00700	EC:2.4.1.18	-2.69423	down	APO2	APO protein 2, chloroplastic [Manihot esculenta]	2.57	3.6	4.52	2.91	5.31	3.8	31.37	30.84	23.49	33.29	44.08	26.98	3.79	31.67
TRINITY_DN44880_c0_g1	K10256	EC:1.14.19.6 1.14.19.22	2.01337	up	FAD12	omega-6 fatty acid desaturase, endoplasmic reticulum isozyme 2 isoform X1 [Sesamum indicum]	0.95	1.47	1.29	1.65	0.84	1.2	0	0.63	0	0.09	0.99	0.67	1.23	0.4
TRINITY_DN44881_c0_g2	K00472	EC:1.14.11.2	-1.14704	down	P4H12	hypothetical protein POPTR_012G142800 [Populus trichocarpa]	1.08	2.07	1.68	1.69	1.1	0.64	4.71	3.8	3.24	3.64	4.39	4	1.38	3.96
TRINITY_DN44885_c0_g2	K00789	EC:2.5.1.6	2.27491	up	METK4	PREDICTED: S-adenosylmethionine synthase 4 [Populus euphratica]	169.92	175.58	154.02	240.17	256.31	222.72	63.27	68.14	56.82	86.88	51.54	49.82	203.12	62.75
TRINITY_DN44885_c0_g3	K00789	EC:2.5.1.6	2.04128	up	SAMS2	S-adenosylmethionine synthase 2 [Ziziphus jujuba]	18.42	19.02	14.39	26.37	16.32	19.75	5.58	6.05	4.49	6.42	4.02	4.71	19.05	5.21
TRINITY_DN44885_c0_g6	K00789	EC:2.5.1.6	1.70755	up	SAMS2	S-adenosylmethionine synthase 1-like [Sesamum indicum]	2.8	1.82	3.52	3.97	2.88	2.86	1.07	1.08	0.54	0.39	2.11	1.92	2.97	1.19
TRINITY_DN44891_c2_g2	K12486	-	2.63061	up	CAR4	C2 domain-containing protein [Cephalotus follicularis]	50.2	53.28	40.88	66.84	75.91	36.62	7.6	8.65	10.42	15.28	19.67	9.45	53.96	11.85
TRINITY_DN44896_c0_g1	K13436	EC:2.7.11.1	2.08613	up	PTI13	PTI1-like tyrosine-protein kinase 1 [Hevea brasiliensis]	7.01	11.63	11.5	11.09	8.16	7.59	1.98	1.95	3.37	2.4	4.77	3.54	9.5	3
TRINITY_DN44896_c1_g1	K14379	EC:3.1.3.2	-3.6849	down	PAP3	hypothetical protein POPTR_008G139300 [Populus trichocarpa]	0.05	0.35	0.36	2.9	0.35	0.05	0.19	0.12	1.66	0.09	56.9	0.18	0.68	9.86
TRINITY_DN44898_c0_g1	K03013	-	-1.00547	down	NRPE5A	DNA-directed RNA polymerase V subunit 5A isoform X1 [Citrus clementina]	4.27	3.15	2.75	1.79	2.82	3.06	7.74	6.81	8.05	6.45	6.53	6.14	2.97	6.95
TRINITY_DN44898_c0_g2	K08269	EC:2.7.11.1	-1.05865	down	ATG1C	serine/threonine-protein kinase ATG1c-like isoform X1 [Manihot esculenta]	0.86	0.76	0.8	1	0.7	0.71	2.59	3.26	1.42	2.07	1.77	1.98	0.81	2.18
TRINITY_DN44904_c0_g2	K03938	-	-1.34219	down	-	NADH dehydrogenase [ubiquinone] iron-sulfur protein 5-B-like [Herrania umbratica]	54.92	42.07	44.46	32.88	51.24	47.59	118.84	109.99	133	138.71	133.05	121.46	45.53	125.84
TRINITY_DN44911_c1_g10	K13229	EC:1.14.11.59	1.93871	up	At1g06650	unnamed protein product, partial [Vitis vinifera]	3.84	2.14	8.38	6.76	5.7	7.28	3.42	0.89	0.36	0.36	1.15	5.53	5.68	1.95
TRINITY_DN44913_c1_g5	K05309	EC:5.3.99.3	-1.46979	down	ptges2	prostaglandin E synthase 2 [Hevea brasiliensis]	2.82	2.95	2.39	2.71	4.64	2.8	10.54	11.47	11.52	11.88	9.28	10.59	3.05	10.88
TRINITY_DN44915_c1_g1	K12173	-	-2.89691	down	TL1	thaumatin-like protein 1b isoform X1 [Manihot esculenta]	0.24	0.34	0.14	0.41	0.64	0.33	3.13	3.49	2.64	4.19	4.82	2.91	0.35	3.53
TRINITY_DN44921_c1_g4	K12121	-	-2.3554	down	PHYB1	Phytochrome B like [Actinidia chinensis var. chinensis]	4.83	1.63	5.59	5.29	3.87	3.14	27.1	29.24	10.68	27.02	20.59	15.39	4.06	21.67
TRINITY_DN44927_c1_g2	K15744	EC:5.2.1.12	-2.32486	down	Z-ISO	15-cis-zeta-carotene isomerase, chloroplastic isoform X1 [Populus trichocarpa]	4.61	3.53	1.69	1.65	5.82	6.28	25.59	24.88	26.09	25.44	23.99	25.71	3.93	25.28
TRINITY_DN44936_c0_g1	K04121	EC:4.2.3.19	6.72247	up	-	ent-kaur-16-ene synthase, chloroplastic [Ricinus communis]	17.09	16.43	31.92	14.51	13.1	17.14	0.25	0.14	0.18	0.28	0.45	0.16	18.36	0.24
TRINITY_DN44936_c0_g2	K04121	EC:4.2.3.19	6.04092	up	-	ent-kaur-16-ene synthase, chloroplastic [Ricinus communis]	23.06	22.67	36.91	15.63	19.32	22.78	0	1.22	1.12	0.36	0	0.79	23.39	0.58
TRINITY_DN44940_c1_g2	K13260	EC:1.14.13.89 1.14.13.53	-5.29256	down	CYP81E8	cytochrome P450 81E8 [Ricinus communis]	0.39	0.32	0.78	0.24	0.75	0.42	35.88	28.85	20.43	30.58	19.55	20.96	0.48	26.04
TRINITY_DN44943_c1_g4	K07897	-	-1.02752	down	-	ras-related protein Rab-7b [Cucumis sativus]	15.05	31.5	16.57	22.61	13.52	20.03	44.79	52.98	59.42	48.33	61.64	56.61	19.88	53.96
TRINITY_DN44947_c0_g1	K00601	EC:2.1.2.2	-2.55705	down	PUR3	hypothetical protein JCGZ_00974 [Jatropha curcas]	2.21	3.17	2.41	2.77	2.74	2.11	22.37	23.11	21.8	21.75	17.9	20.34	2.57	21.21
TRINITY_DN44953_c2_g8	K00430	EC:1.11.1.7	3.08954	up	PER12	peroxidase 12 [Ricinus communis]	144.67	85.2	144.31	63.59	89.29	155.57	8.4	8.85	30.32	9.03	20.45	33.68	113.77	18.45
TRINITY_DN44953_c2_g9	K00430	EC:1.11.1.7	-1.97995	down	PER12	peroxidase 12 [Populus trichocarpa]	0.69	0.28	0.56	0	0.74	0.55	2.71	4.52	1.03	4.08	0.57	2.12	0.47	2.51
TRINITY_DN44955_c0_g5	K13229	EC:1.14.11.59	-3.05187	down	At1g06620	1-aminocyclopropane-1-carboxylate oxidase homolog 3-like isoform X3 [Hevea brasiliensis]	1.35	1.94	1.23	1.71	1.36	0.87	15.04	15.7	14.22	14.77	11.95	16.54	1.41	14.7
TRINITY_DN44956_c4_g2	K01728	EC:4.2.2.2	-3.47158	down	At1g67750	probable pectate lyase 5 [Hevea brasiliensis]	0.05	0.27	0.86	0.11	2.68	0.7	3.14	2.32	8.99	41.38	1.07	13.25	0.78	11.69
TRINITY_DN44958_c0_g1	K03868	EC:2.3.2.32	-2.69349	down	GEM	GEM-like protein 1 isoform X1 [Manihot esculenta]	0.86	2.7	1.67	1.5	1.23	1.11	18.38	17.24	16.93	9.85	4.88	7.45	1.51	12.46
TRINITY_DN44963_c2_g4	K08912	-	8.25559	up	CAB21	PREDICTED: chlorophyll a-b binding protein 21, chloroplastic-like [Nicotiana tomentosiformis]	0	0	26.76	0	15.06	0	0	0	0	0	0	0	6.97	0
TRINITY_DN44973_c0_g1	K00695	EC:2.4.1.13	-1.0419	down	SUS2	LOW QUALITY PROTEIN: sucrose synthase 2 [Ricinus communis]	47.43	72.35	22.28	50.17	33	46.84	84.28	65.3	101.19	73.38	100.89	92.73	45.35	86.3
TRINITY_DN44975_c0_g2	K09588	EC:1.14.-.-	-5.05896	down	CYP90A1	cytochrome P450 90A1, partial [Ricinus communis]	0.69	0.71	0.15	0.73	0.63	0.67	46.6	37.47	27.68	26.92	20.81	36.47	0.6	32.66
TRINITY_DN44982_c1_g1	K10578	EC:2.3.2.23	1.69716	up	UBC32	ubiquitin-conjugating enzyme E2 32-like [Sesamum indicum]	0.99	1.01	0.65	1.96	2.39	2.22	0.22	0.77	0.18	0.09	0.21	0.49	1.54	0.33
TRINITY_DN44995_c0_g1	K10683	-	-1.3387	down	PCMP-H26	pentatricopeptide repeat-containing protein At2g02980, chloroplastic-like [Hevea brasiliensis]	1.32	1.98	1.34	1.02	1.58	1.62	5.87	5.43	6.27	4.86	2.62	4.49	1.48	4.92
TRINITY_DN45007_c0_g2	K07441	EC:2.4.1.141	-1.64345	down	ALG14	PREDICTED: UDP-N-acetylglucosamine transferase subunit ALG14 homolog [Gossypium arboreum]	3.37	3.91	2.99	3.17	2.45	2.79	16.36	14.21	11.21	11.61	7.88	7.74	3.11	11.5
TRINITY_DN45008_c1_g4	K00284	EC:1.4.7.1	1.72741	up	FdGOGAT	ferredoxin-dependent glutamate synthase, chloroplastic [Sesamum indicum]	0.39	0.36	0.54	0.53	0.5	0.54	0.24	0.17	0.11	0.05	0.27	0.34	0.48	0.2
TRINITY_DN45018_c1_g1	K02908	-	-1.67762	down	-	uncharacterized protein LOC110647070 [Hevea brasiliensis]	0.95	0.32	2.36	0.38	4.11	1.19	2.24	2.69	6.91	13.98	3.83	10.28	1.55	6.66
TRINITY_DN45022_c1_g1	K02885	-	-1.96193	down	RPD1	PORR domain-containing protein [Cephalotus follicularis]	1.41	3.06	1.75	3.94	1.75	1.48	7.51	5.25	11	11.46	20.69	10.52	2.23	11.07
TRINITY_DN45022_c1_g3	K00021	EC:1.1.1.34	3.78463	up	HMG1	3-hydroxy-3-methylglutaryl-coenzyme A reductase 1 [Populus trichocarpa]	102.19	100.18	65.39	73.02	51.62	79.77	6.07	6.1	9.56	10.89	8.37	5.96	78.69	7.83
TRINITY_DN45022_c1_g7	K13993	-	2.4786	up	HSP23.6	23.6 kDa heat shock protein, mitochondrial-like [Manihot esculenta]	426.91	411.44	92.3	291.04	276.25	302.4	72.66	111.21	62.83	51.95	60.19	46.93	300.06	67.63
TRINITY_DN45022_c1_g9	K13993	-	2.67339	up	HSP23.9	23.6 kDa heat shock protein, mitochondrial-like [Manihot esculenta]	8.25	9.38	9.09	14.59	26.46	20.67	5.14	5.04	0.83	2.34	2.5	1.58	14.74	2.9
TRINITY_DN45025_c0_g2	K01183	EC:3.2.1.14	5.3696	up	-	hevamine A precursor-like protein, partial [Rhizophora apiculata]	72.62	17.37	209.53	48.32	45.02	36.97	0.71	2.04	4.05	0.57	0.5	6.55	71.64	2.4
TRINITY_DN45028_c0_g4	K10206	EC:2.6.1.83	-1.33349	down	DAP	LL-diaminopimelate aminotransferase, chloroplastic [Jatropha curcas]	19.65	32.37	14.66	26.74	33.9	31.83	78.37	77.58	80.68	84.2	72.46	77.43	26.52	78.45
TRINITY_DN45031_c0_g4	K17917	-	1.21006	up	SNX2B	sorting nexin 2A-like isoform X3 [Manihot esculenta]	22.92	21.91	20.56	27.21	17.08	21.54	13.76	16.79	12.83	12.14	7.88	11.09	21.87	12.41
TRINITY_DN45039_c2_g1	K10256	EC:1.14.19.6 1.14.19.22	4.33097	up	FAD2	omega-6 fatty acid desaturase [Hevea brasiliensis]	24.75	24.29	20.06	27.14	19.55	21.54	0.84	0.82	1.77	1.84	1.58	1.98	22.89	1.47
TRINITY_DN45041_c0_g1	K00026	EC:1.1.1.37	2.03859	up	-	malate dehydrogenase, glyoxysomal [Sesamum indicum]	0.37	0.46	0.74	0.74	0.68	0.45	0.13	0.13	0.09	0.03	0.34	0.36	0.57	0.18
TRINITY_DN45041_c0_g4	K00026	EC:1.1.1.37	-1.84432	down	MDHG	malate dehydrogenase, glyoxysomal-like [Hevea brasiliensis]	85.28	86.63	88.59	62.15	154.56	122.17	492.08	482.69	495.72	492.94	388.48	570.85	99.9	487.13
TRINITY_DN45048_c4_g2	K07253	EC:5.3.2.1	-1.54205	down	-	hypothetical protein GOBAR_AA17892 [Gossypium barbadense]	6.48	7	11.57	7.59	14.62	10.97	44.66	40.27	36.45	39.5	22.44	36.54	9.71	36.64
TRINITY_DN45054_c0_g1	K00873	EC:2.7.1.40	-1.20373	down	-	pyruvate kinase isozyme A, chloroplastic-like [Hevea brasiliensis]	0.39	0.66	0.65	0.57	1.14	0.53	1.47	2.43	1.86	2.58	1.3	2.1	0.66	1.96
TRINITY_DN45055_c3_g1	K19366	-	-1.6655	down	ERD7	protein EARLY-RESPONSIVE TO DEHYDRATION 7, chloroplastic [Jatropha curcas]	15.08	25.87	20.8	13.64	12.11	12.68	8.82	9.23	59.32	57.76	162.6	106.26	16.7	67.33
TRINITY_DN45057_c2_g2	K13993	-	3.49122	up	HSP17.7	PREDICTED: 17.9 kDa class II heat shock protein-like [Populus euphratica]	287.64	246.68	176.04	252.72	399.25	266.08	20.02	27.6	34.83	36.63	59.26	46.79	271.4	37.52
TRINITY_DN45058_c1_g8	K14500	EC:2.7.11.1	-1.9821	down	At4g35230	serine/threonine-protein kinase BSK1 [Populus trichocarpa]	3.14	2.85	3.65	1.59	3.46	2.92	17.45	17.61	16.18	16.82	11.04	16.42	2.94	15.92
TRINITY_DN45064_c0_g1	K20604	EC:2.7.12.2	-1.7897	down	MKK9	PREDICTED: mitogen-activated protein kinase kinase 9-like [Juglans regia]	22.51	16.78	7.32	10.1	24.19	35.52	69.99	71.44	43.74	145.51	95.44	92.89	19.4	86.5
TRINITY_DN45066_c0_g1	K02701	-	-1.37224	down	PSAN	PREDICTED: photosystem I reaction center subunit N, chloroplastic-like [Populus euphratica]	152.34	156.99	165.92	169.81	413.36	282.14	1085.83	822.79	783.21	731.64	453.89	660.23	223.43	756.26
TRINITY_DN45066_c0_g2	K02701	-	7.24645	up	PSAN	PREDICTED: photosystem I reaction center subunit N, chloroplastic [Nicotiana tomentosiformis]	0	0	8.62	0	3.19	0	0	0	0	0	0	0	1.97	0
TRINITY_DN45066_c0_g3	K02701	-	2.40567	up	PSAN	photosystem I reaction center subunit N, chloroplastic [Sesamum indicum]	1.42	0.88	2.92	3.64	2.89	2.92	0.51	0.64	0.14	0.14	0.77	1.24	2.44	0.57
TRINITY_DN45090_c2_g3	K12486	-	-2.57885	down	CAR5	PREDICTED: probable ADP-ribosylation factor GTPase-activating protein AGD13 isoform X3 [Populus euphratica]	10.88	26.92	12.44	18.1	17.45	17.39	123.35	140.06	107.02	131.84	162.25	126.96	17.2	131.91
TRINITY_DN45090_c3_g1	K07953	EC:3.6.5.-	1.22444	up	SAR1A	hypothetical protein CICLE_v10005438mg [Citrus clementina]	81.47	102.66	72.22	123.72	98.71	97.48	35.61	64.67	47.59	67.64	52.72	43.37	96.04	51.93
TRINITY_DN45091_c1_g1	K13348	-	-1.35071	down	-	uncharacterized protein LOC8262110 isoform X4 [Ricinus communis]	4.7	9.37	3.59	6.21	6.45	6.89	19.01	20.04	19.73	20.61	20.91	20.03	6.2	20.05
TRINITY_DN45095_c1_g2	K03146	EC:2.4.2.60	-2.37644	down	THI1-2	thiamine thiazole synthase 2, chloroplastic [Citrus sinensis]	103.22	187.21	116.93	168.37	294.31	192.33	1478.78	1468.14	1057.01	1180.07	785.28	1023.66	177.06	1165.49
TRINITY_DN45095_c1_g3	K03146	EC:2.4.2.60	-3.15733	down	THI1-2	PREDICTED: thiamine thiazole synthase 2, chloroplastic [Vitis vinifera]	0.27	0.3	0.33	0.21	0.28	0.35	4.63	4.21	3.59	3.13	2.44	1.8	0.29	3.3
TRINITY_DN45101_c2_g6	K01051	EC:3.1.1.11	-2.2837	down	PME18	pectinesterase [Populus trichocarpa]	0.8	0.5	0.14	0.03	0.66	0.26	0.8	0.61	0.48	7.33	2.02	4.13	0.4	2.56
TRINITY_DN45114_c0_g1	K14498	EC:2.7.11.1	-1.68366	down	SAPK1	hypothetical protein B456_005G094500 [Gossypium raimondii]	14.43	9.87	7.79	7.94	9	6.74	39.67	41.67	32.22	40.05	34.09	37.8	9.29	37.58
TRINITY_DN45114_c0_g3	K14498	EC:2.7.11.1	3.51127	up	SRK2E	PREDICTED: serine/threonine-protein kinase SRK2E [Ipomoea nil]	48.21	58.59	36.29	44.52	33.74	35.56	5.12	5.39	4.53	5.01	5.76	4.72	42.82	5.09
TRINITY_DN45119_c1_g1	K10576	EC:2.3.2.23	1.49568	up	ATL48	RING-H2 finger protein ATL48 [Populus trichocarpa]	87.55	87.78	67.21	64.45	91.71	82.38	47.16	38.5	43.97	46.2	40.36	42.08	80.18	43.04
TRINITY_DN45120_c0_g2	K03094	-	-2.97972	down	FEZ	protein FEZ [Hevea brasiliensis]	1.2	2.67	2.89	1.47	1.17	1.05	14.37	15.77	13.21	10.77	18.87	10.71	1.74	13.95
TRINITY_DN45121_c0_g6	K03006	EC:2.7.7.6	1.72909	up	At2g25060	early nodulin-like protein 1 [Manihot esculenta]	4.89	1.15	5.55	0.84	5.25	4.58	0.4	2.49	1.29	0.87	0.84	3.14	3.71	1.5
TRINITY_DN45126_c1_g4	K01213	EC:3.2.1.67	-5.06483	down	At1g48100	polygalacturonase At1g48100-like isoform X2 [Hevea brasiliensis]	0.1	0.2	0.16	0.15	0.27	0.08	14.81	10.98	7.38	7.16	3.62	5.17	0.16	8.19
TRINITY_DN45130_c2_g1	K01937	EC:6.3.4.2	2.03609	up	SMB	protein SOMBRERO isoform X1 [Prunus yedoensis var. nudiflora]	4.32	3.86	2.82	2.2	4.57	1.74	0.95	0.85	1.06	1.11	1.01	1.04	3.25	1
TRINITY_DN45132_c1_g3	K04506	EC:2.3.2.27	-3.62116	down	-	E3 ubiquitin-protein ligase SINA-like 10 [Ricinus communis]	0.18	0.47	0.27	0.49	0.42	0.36	2.44	4.33	9.55	6.38	6.09	7.53	0.36	6.05
TRINITY_DN45134_c0_g1	K03754	-	-2.41522	down	eif2b2	hypothetical protein CDL15_Pgr016160 [Punica granatum]	0.97	2.55	0.45	1.27	0.75	1.22	9.43	10.31	6.87	8.12	7.74	6.64	1.2	8.19
TRINITY_DN45136_c0_g3	K01662	EC:2.2.1.7	-1.86963	down	Os07g0190000	probable 1-deoxy-D-xylulose-5-phosphate synthase 2, chloroplastic [Jatropha curcas]	1.46	2.32	2.8	2.51	3.04	3.04	15.39	15.67	12.15	13.01	4.98	9.96	2.53	11.86
TRINITY_DN45138_c0_g3	K13354	-	-2.41809	down	PXN	peroxisomal nicotinamide adenine dinucleotide carrier isoform X1 [Ricinus communis]	2.43	3.37	0.17	0.47	0.69	1.41	8.32	10.21	3.7	11.17	12.72	10.39	1.42	9.42
TRINITY_DN45155_c5_g1	K14496	-	2.45799	up	PYL2	abscisic acid receptor PYL2 [Populus trichocarpa]	3.99	7.67	8.51	20.15	9.81	6.88	0.13	0.38	1.38	4.54	5.15	2.2	9.5	2.3
TRINITY_DN45169_c0_g1	K01867	EC:6.1.1.2	-1.01603	down	SNF4	hypothetical protein JCGZ_01998 [Jatropha curcas]	6.15	7.87	4.37	6.27	4.34	5.78	13.8	15.34	14.45	14.58	16.59	14.98	5.8	14.96
TRINITY_DN45170_c0_g4	K13679	EC:2.4.1.242	1.96561	up	WAXY	granule-bound starch synthase 1, chloroplastic/amyloplastic-like [Olea europaea var. sylvestris]	0.82	0.59	1.21	1.66	0.95	0.98	0.36	0.33	0.05	0.03	0.62	0.67	1.04	0.34
TRINITY_DN45171_c0_g1	K13065	EC:2.3.1.133	7.47741	up	ACT	PREDICTED: vinorine synthase [Theobroma cacao]	673.24	206.47	533.43	274.82	296.87	211.82	3.06	1.54	2.23	3.32	2.23	2.81	366.11	2.53
TRINITY_DN45176_c0_g1	K03062	-	3.33863	up	OEP7	outer envelope membrane protein 7-like [Hevea brasiliensis]	86.45	97.52	120.29	138.07	135.81	112.01	17.21	17.48	11.38	19.06	14.48	12.46	115.02	15.34
TRINITY_DN45176_c0_g3	K11087	-	1.17428	up	SmD1	small nuclear ribonucleoprotein Sm D1 [Prunus persica]	31.92	37.07	22.04	27.89	36.68	32.6	21.38	17.06	21.99	17.76	15.46	17.54	31.37	18.53
TRINITY_DN45184_c0_g4	K01365	EC:3.4.22.15	2.8205	up	RD21B	cysteine proteinase RD21A-like [Hevea brasiliensis]	49	55.52	59.16	58	39.78	68.5	2.48	2.44	9.86	9.57	21.89	16.55	54.99	10.47
TRINITY_DN45196_c0_g3	K02113	-	-1.89411	down	ATPD	ATP synthase subunit delta, chloroplastic [Jatropha curcas]	34.71	60.6	31.88	64.97	139.76	79.05	375.82	338.82	325.67	336.23	239.86	348.17	68.49	327.43
TRINITY_DN45196_c0_g6	K02113	-	2.44819	up	ATPD	ATP synthase delta chain, chloroplastic-like [Sesamum indicum]	0.35	0.36	1.83	1.71	1.23	1.18	0.36	0.07	0.07	0	0.62	0.47	1.11	0.27
TRINITY_DN45197_c0_g1	K17982	EC:4.2.3.144	7.66191	up	GES	terpene synthase [Populus trichocarpa]	121.15	3.46	294.18	6.29	24.74	43.77	0.74	0.15	0.25	0.11	0.41	1.05	82.27	0.45
TRINITY_DN45202_c0_g7	K02883	-	1.21412	up	RPL18B	60S ribosomal protein L18 [Abrus precatorius]	22.56	36.59	13.38	32.18	27.22	28.67	11.09	12.25	23.9	13.43	14.73	16.49	26.77	15.31
TRINITY_DN45204_c0_g1	K00588	EC:2.1.1.104	6.08747	up	CCOAOMT1	caffeoyl-CoA O-methyltransferase 5 [Prunus yedoensis var. nudiflora]	579.84	315.84	977.38	670.75	617.19	557.74	9.42	13.37	14.72	10.13	8.95	17.59	619.79	12.36
TRINITY_DN45216_c1_g1	K05349	EC:3.2.1.21	2.56036	up	BACOVA_02659	uncharacterized protein LOC110626576 [Manihot esculenta]	7.63	2.23	5.28	4.76	10.17	4.99	0.6	1.65	0.4	0.43	1.16	1.68	5.84	0.99
TRINITY_DN45236_c2_g3	K13431	-	2.43967	up	Gtp-bp	signal recognition particle receptor subunit alpha homolog [Ziziphus jujuba]	72.25	73.89	75.9	71.45	52.36	51.1	13.19	16.3	12.32	14.39	17.44	16.33	66.16	14.99
TRINITY_DN45239_c0_g2	K11816	EC:1.14.13.168	6.7205	up	YUC8	probable indole-3-pyruvate monooxygenase YUCCA5 [Ricinus communis]	1.11	0.03	28.83	4.06	0.23	0.06	0	0	0	0	0.03	0	5.72	0.01
TRINITY_DN45241_c0_g3	K00121	EC:1.1.1.284 1.1.1.1	3.50483	up	At5g42250	alcohol dehydrogenase-like 7 [Jatropha curcas]	17.14	10.42	11.88	5.89	12.78	11.41	0.41	0.3	0.91	1.72	0.5	6.57	11.59	1.74
TRINITY_DN45245_c1_g1	K05658	EC:3.6.3.44	-1.60699	down	ABCB1	ABC transporter B family member 1 [Manihot esculenta]	3.83	3.05	6.02	5.67	8.3	5.76	22.03	33.13	27.45	17.12	17.11	20.33	5.44	22.86
TRINITY_DN45245_c2_g2	K03033	-	1.8946	up	21D7	probable 26S proteasome non-ATPase regulatory subunit 3 [Hevea brasiliensis]	77.19	105.3	39.06	80.85	53.19	60.91	17.43	20.67	23.35	25.42	25.44	28.14	69.42	23.41
TRINITY_DN45247_c0_g1	K03239	-	6.42557	up	At3g14260	PREDICTED: protein LURP-one-related 11-like [Populus euphratica]	1.24	0.46	2.75	1.03	2.96	1.76	0	0	0	0.08	0	0	1.7	0.01
TRINITY_DN45247_c1_g1	K15889	EC:3.1.1.-	-1.69793	down	ICMEL1	Arylacetamide deacetylase [Handroanthus impetiginosus]	1.91	2.03	4.7	1.74	4.39	1.09	14.73	17.2	10.46	13.24	8.19	13.13	2.64	12.83
TRINITY_DN45251_c0_g1	K09755	EC:1.14.-.-	4.11142	up	CYP84A1	cytochrome P450 84A1-like [Hevea brasiliensis]	157.92	78.69	727.5	165.46	152.38	112.4	19.62	19.3	24.31	14.44	11.17	21.93	232.39	18.46
TRINITY_DN45260_c1_g3	K17991	EC:1.11.2.3	1.98234	up	PXG4	probable peroxygenase 4 [Ricinus communis]	7.18	6.99	8.34	7.6	17.67	7.07	2.82	1.45	2.61	4.28	2.74	4.63	9.14	3.09
TRINITY_DN45263_c0_g1	K02960	-	2.16884	up	RCA1	ribulose bisphosphate carboxylase/oxygenase activase, chloroplastic-like isoform X1 [Rosa chinensis]	2.57	4.52	12.48	0.71	6.58	0.48	3.51	1.14	0.6	1.28	0.36	0.35	4.56	1.21
TRINITY_DN45263_c0_g2	K02960	-	2.35276	up	RCA1	ribulose bisphosphate carboxylase/oxygenase activase, chloroplastic isoform X1 [Sesamum indicum]	7.77	10.32	16.73	20.5	13.64	15.74	3.47	4.87	0.75	0.19	6.48	5.78	14.12	3.59
TRINITY_DN45264_c0_g3	K13348	-	3.09421	up	-	PREDICTED: PXMP2/4 family protein 4-like [Populus euphratica]	67.44	53.44	36.96	50.95	45.69	68.41	6.22	5.32	13.59	6.71	6.28	9.99	53.81	8.02
TRINITY_DN45265_c0_g1	K04121	EC:4.2.3.19	2.16287	up	-	PREDICTED: ent-kaur-16-ene synthase, chloroplastic isoform X2 [Cucumis sativus]	7.84	11.8	17.56	9.13	11.87	6.95	1.18	2.03	3.57	0.37	7.54	4.08	10.86	3.13
TRINITY_DN45265_c1_g1	K04121	EC:4.2.3.19	5.22199	up	-	ent-kaur-16-ene synthase, chloroplastic [Ricinus communis]	2.05	0	8.88	0.6	4.42	2.67	0.2	0	0.05	0.05	0	0.19	3.1	0.08
TRINITY_DN45266_c2_g7	K07375	-	2.17339	up	TUBB1	PREDICTED: tubulin beta chain [Fragaria vesca subsp. vesca]	6.95	6.77	5.58	8.81	4.37	7.18	1.48	1.27	2.79	2.47	1.31	2.11	6.61	1.91
TRINITY_DN45268_c0_g1	K12823	EC:3.6.4.13	-2.8861	down	RH58	DEAD-box ATP-dependent RNA helicase 58, chloroplastic isoform X1 [Hevea brasiliensis]	0.86	2.36	1.5	1.7	3.25	1.87	15.78	20.05	16.85	16.78	17.08	15.79	1.92	17.06
TRINITY_DN45274_c1_g1	K00565	EC:2.1.1.56	-1.24859	down	At3g52210	mRNA cap guanine-N7 methyltransferase 2 isoform X2 [Hevea brasiliensis]	13.89	14.63	6.16	12.64	10.73	9.51	49.04	45.09	27.3	25.64	23.22	26.69	11.26	32.83
TRINITY_DN45280_c3_g2	K12448	EC:5.1.3.5	1.60043	up	MUR4	UDP-arabinose 4-epimerase 1 [Prunus persica]	14.24	15.57	13.42	12.27	12.33	10.72	4.42	5.86	6.73	7.04	6.67	6.55	13.09	6.21
TRINITY_DN45282_c0_g1	K00873	EC:2.7.1.40	3.44705	up	OsI_37456	pyruvate kinase 1, cytosolic [Manihot esculenta]	14.37	8.66	7.47	20.13	10.34	9.98	1.01	0.5	2.1	2.74	2.23	3.39	11.83	2
TRINITY_DN45286_c2_g2	K13544	EC:3.1.1.82	-1.72057	down	MES17	methylesterase 17 [Hevea brasiliensis]	6.16	4.93	5.86	5.26	6.17	4.89	19.76	19.93	23.06	20.68	37.4	22.61	5.55	23.91
TRINITY_DN45290_c2_g2	K13412	EC:2.7.11.1	-1.33998	down	CPK1	hypothetical protein MANES_02G015100 [Manihot esculenta]	1.48	2.74	2.15	1.73	4.8	2.75	6.92	7.58	9.6	11.33	7.27	6.46	2.61	8.19
TRINITY_DN45293_c1_g1	K00133	EC:1.2.1.11	-1.62376	down	-	CRAL-TRIO domain-containing protein YKL091C-like isoform X1 [Hevea brasiliensis]	5.74	4.69	3.17	4.71	6.83	5.14	17.31	20.16	23.11	18.48	18.19	23.47	5.05	20.12
TRINITY_DN45298_c0_g1	K20538	EC:2.7.11.24	1.1317	up	MPK18	mitogen-activated protein kinase 19-like isoform X1 [Hevea brasiliensis]	45.59	69.37	30.11	54.75	45.1	47.55	36.11	37.78	22.75	30.5	19.4	21.14	48.74	27.95
TRINITY_DN45308_c0_g1	K01187	EC:3.2.1.20	-4.99951	down	At1g30700	berberine bridge enzyme-like 8 [Hevea brasiliensis]	0.09	0.31	0.19	0.09	0.36	0.28	9.07	10.95	6.24	16.64	1.74	9.67	0.22	9.05
TRINITY_DN45309_c0_g6	K14493	EC:3.-.-.-	1.68655	up	CXE15	probable carboxylesterase 15 [Hevea brasiliensis]	16.25	20.47	3.62	6.01	14.92	15.71	0.83	1.29	3.65	5.48	9.2	10.07	12.83	5.09
TRINITY_DN45314_c2_g1	K14565	-	-1.90693	down	NOP5-1	probable nucleolar protein 5-2 [Manihot esculenta]	1.34	1.39	1.4	1.02	1.45	0.72	7.09	6.84	6.78	5.81	4.35	5.3	1.22	6.03
TRINITY_DN45315_c0_g5	K01915	EC:6.3.1.2	1.40751	up	GLN1-1	glutamine synthetase nodule isozyme-like [Durio zibethinus]	409.16	409.61	322.76	245.28	324.39	414.61	119.65	151.69	198.56	205.08	207.73	229.72	354.3	185.41
TRINITY_DN45328_c0_g1	K14506	EC:6.3.2.52	2.45498	up	GH3.5	jasmonic acid-amido synthetase JAR1 [Herrania umbratica]	5.67	10.55	13.4	11.74	7.1	12.32	3.45	1.7	2.85	1.61	1.14	3.84	10.13	2.43
TRINITY_DN45330_c3_g7	K02716	-	1.93857	up	PSBO	PREDICTED: oxygen-evolving enhancer protein 1, chloroplastic [Ipomoea nil]	0.27	0.92	1.2	1.38	1.15	1.03	0.42	0.55	0	0	0.67	0.33	0.99	0.33
TRINITY_DN45333_c0_g7	K13424	-	5.65205	up	-	WRKY transcription factor WRKY24 isoform X2 [Jatropha curcas]	149.05	128.5	66.08	163.28	90.86	105.21	0.88	2.84	2	3.01	6	3.89	117.16	3.1
TRINITY_DN45333_c0_g8	K13424	-	3.12507	up	WRKY24	WRKY transcription factor 4 [(Populus tomentosa x Populus bolleana) x Populus tomentosa]	642.4	315.57	523.28	496.4	409.36	431.97	8.58	7.27	72.56	68.56	125.21	116.76	469.83	66.49
TRINITY_DN45335_c1_g1	K10755	-	-1.52839	down	RFC2	replication factor C subunit 2 isoform X1 [Hevea brasiliensis]	4.51	7.24	3.33	3.42	6.29	3.28	16.77	13.71	13.64	16.01	16.2	13.05	4.68	14.9
TRINITY_DN45337_c0_g4	K10528	EC:4.1.2.-	-1.38513	down	CYP74B2	hypothetical protein CISIN_1g0437041mg, partial [Citrus sinensis]	25.12	16.63	8.91	10.81	24.48	30.58	70.41	72.2	65.83	69.08	73.34	56.58	19.42	67.91
TRINITY_DN45340_c0_g2	K12189	-	-2.92949	down	COR413PM2	cold-regulated 413 plasma membrane protein 2 [Ricinus communis]	1.72	8.07	3.02	3.55	1.64	1.99	5.6	9.72	41.79	17.68	53.67	32.59	3.33	26.84
TRINITY_DN45340_c0_g3	K02874	-	-1.06429	down	HLP	hypothetical protein GOBAR_DD26552 [Gossypium barbadense]	25.45	28.22	18.11	22.07	43	25.84	63.43	69.89	75.78	79.25	80.61	71.74	27.11	73.45
TRINITY_DN45347_c0_g1	K13424	-	1.74053	up	WRKY48	PREDICTED: probable WRKY transcription factor 48 [Populus euphratica]	12.18	25.77	24.42	21.03	14.76	15.84	1.24	2.57	14.54	3.78	6.19	10.85	19	6.53
TRINITY_DN45350_c1_g2	K09699	EC:2.3.1.168	-2.01058	down	MORF3	uncharacterized protein LOC110673970 isoform X2 [Hevea brasiliensis]	8.07	11.69	4.39	9.04	7.29	6.67	48.59	48.35	43.89	46.34	35.36	43.08	7.86	44.27
TRINITY_DN45355_c0_g1	K01176	EC:3.2.1.1	-1.18824	down	PCMP-H40	PREDICTED: putative pentatricopeptide repeat-containing protein At3g01580 [Vitis vinifera]	0.47	0.7	0.46	0.23	0.79	0.52	1.1	2.09	2.19	1.18	1.32	1.39	0.53	1.54
TRINITY_DN45370_c0_g2	K15362	EC:3.6.4.12	1.06472	up	-	Fanconi anemia group J protein homolog [Spinacia oleracea]	1.16	0.6	1.77	0.53	0.85	0.37	1.05	0.23	0.42	0.45	0.48	0.67	0.88	0.55
TRINITY_DN45370_c0_g3	K15362	EC:3.6.4.12	1.48699	up	BRIP1	PREDICTED: Fanconi anemia group J protein homolog isoform X1 [Populus euphratica]	0.69	1.44	2.55	0.79	1.22	1.87	0.68	0.33	0.57	0.39	0.38	1.35	1.43	0.62
TRINITY_DN45375_c0_g2	K18482	EC:4.1.3.38	1.90398	up	DAAT	D-amino-acid transaminase, chloroplastic-like [Hevea brasiliensis]	37.27	48.79	16.78	26.22	38.32	31.13	7.73	12.01	11.97	11.87	10.38	13.89	33.09	11.31
TRINITY_DN45380_c1_g2	K12472	-	1.75307	up	BURP3	BURP domain protein RD22 [Sesamum indicum]	0.33	0.54	1.27	1.34	1.58	1.85	0.34	0.43	0.19	0.14	1	0.46	1.15	0.43
TRINITY_DN45381_c0_g1	K19073	EC:1.3.1.75	-1.73223	down	ycf39	putative dehydrogenase [Handroanthus impetiginosus]	4	4.9	8.36	5.04	8.37	5.04	29.88	26.83	28.43	24.49	20.14	25.75	5.95	25.92
TRINITY_DN45386_c0_g1	K05396	EC:4.4.1.15	-1.77578	down	Os02g0773300	bifunctional D-cysteine desulfhydrase/1-aminocyclopropane-1-carboxylate deaminase, mitochondrial isoform X2 [Citrus sinensis]	6.21	5.26	4.24	3.93	6.26	4.69	20.78	20.78	25.33	20.51	19.44	22.19	5.1	21.5
TRINITY_DN45393_c0_g1	K00430	EC:1.11.1.7	6.29951	up	PER50	peroxidase 51 [Jatropha curcas]	223.26	76.21	351.85	126.82	238.79	210.14	2.1	1.45	3.29	3.23	2.06	6.04	204.51	3.03
TRINITY_DN45400_c0_g3	K03094	-	1.83458	up	ASK14	SKP1-like protein 14 [Manihot esculenta]	17.85	34.09	19.3	37.02	27.88	22.3	11.68	14.36	10.06	8.29	6.26	5.69	26.41	9.39
TRINITY_DN45416_c0_g1	K11130	-	-2.18947	down	At2g20490	hypothetical protein VIGAN_04310200, partial [Vigna angularis var. angularis]	0.28	0.44	0	0.15	1.54	0.62	1	1.69	3.78	1.6	6.85	8.02	0.51	3.82
TRINITY_DN45419_c0_g1	K03183	EC:2.1.1.163 2.1.1.201	-1.2405	down	MENG	PREDICTED: 2-phytyl-1,4-beta-naphthoquinone methyltransferase, chloroplastic [Populus euphratica]	6.16	11.24	8.64	8.44	19.85	12.95	34.86	31.6	29.14	35.27	21.23	32.16	11.21	30.71
TRINITY_DN45432_c1_g1	K02995	-	2.27883	up	RPS8	hypothetical protein GOBAR_AA09977 [Gossypium barbadense]	0.83	1.9	0.62	0.93	1.86	1.6	0.14	0.63	0.53	0.4	0.05	0.34	1.29	0.35
TRINITY_DN45436_c2_g4	K01535	EC:3.6.3.6	1.7246	up	PMA4	Plasma membrane H+-transporting ATPase [Handroanthus impetiginosus]	0.2	0.37	0.4	0.6	0.53	0.7	0.06	0.09	0.14	0.08	0.42	0.3	0.47	0.18
TRINITY_DN45437_c0_g1	K14007	-	-2.30879	down	-	protein transport protein Sec24-like At3g07100 [Jatropha curcas]	1.63	2.33	0.4	0.54	1.42	0.71	7.95	7.59	6.6	9.17	6.38	6.72	1.17	7.4
TRINITY_DN45437_c1_g3	K14007	-	-2.46852	down	At3g07100	protein transport protein Sec24-like At3g07100 [Populus trichocarpa]	1.04	2.29	0.21	0.97	1.39	0.57	10.75	7.83	7.4	7.55	6.76	5.7	1.08	7.66
TRINITY_DN45443_c1_g2	K03283	-	2.70576	up	HSC-I	hsp70 protein, partial [Zea mays]	387.76	389.37	182.47	373.21	363.86	423.72	27.58	52.51	110.92	49.28	85.23	84.46	353.4	68.33
TRINITY_DN45443_c1_g4	K03283	-	3.55223	up	HSP70	PREDICTED: heat shock cognate 70 kDa protein 2 [Juglans regia]	5977.62	5804.97	2734.94	5646.27	4332.03	4876.9	232.92	410.89	1135.41	677.01	882.15	849.85	4895.46	698.04
TRINITY_DN45443_c1_g5	K03283	-	1.26125	up	HSP70	Molecular chaperones HSP70/HSC70, HSP70 superfamily [Handroanthus impetiginosus]	0.39	0.36	0.44	0.48	0.57	0.66	0.15	0.06	0.28	0.16	0.39	0.56	0.48	0.27
TRINITY_DN45446_c1_g3	K07513	EC:2.3.1.16	-1.59671	down	PED1	Peroxisomal 3-ketoacyl-CoA thiolase 3 isoform 1 [Theobroma cacao]	8.97	20.45	11.75	14.78	8.87	11.41	49.63	67.18	55.1	48.51	48.22	56.28	12.71	54.15
TRINITY_DN45447_c0_g4	K17961	EC:1.14.14.58 1.14.14.59	2.17833	up	CYP82G1	cytochrome P450 82G1-like [Hevea brasiliensis]	3.76	2.84	3.47	1.63	4.39	1.3	0.04	0.94	0.57	0.63	0.34	3.14	2.9	0.94
TRINITY_DN45449_c2_g6	K02896	-	1.44773	up	RPL24	60S ribosomal protein L24 [Oryza sativa Japonica Group]	0.36	0.73	1.17	0.97	0.53	0.67	0.41	0.36	0	0.2	0.54	0.58	0.74	0.35
TRINITY_DN45451_c0_g1	K00799	EC:2.5.1.18	-1.88697	down	GOT1	vesicle transport protein GOT1 isoform X2 [Jatropha curcas]	4.63	2.08	5.4	3.47	5.8	3.97	25.82	22.59	18.66	18.63	17	16.62	4.22	19.89
TRINITY_DN45457_c0_g3	K01590	EC:4.1.1.22	2.50037	up	SDC	Glutamate decarboxylase [Handroanthus impetiginosus]	0.26	0.27	0.21	0.44	0.3	0.33	0.05	0.11	0	0.03	0.13	0.08	0.3	0.07
TRINITY_DN45468_c1_g3	K04371	EC:2.7.11.24	2.11456	up	NTF6	mitogen-activated protein kinase homolog NTF6 [Ricinus communis]	43.86	38.58	65.86	47.33	39.26	32.53	1.63	2.08	22.87	6.91	20.66	26.94	44.57	13.52
TRINITY_DN45482_c0_g1	K12820	EC:3.6.4.13	1.32759	up	At2g47250	PREDICTED: probable pre-mRNA-splicing factor ATP-dependent RNA helicase DEAH2 isoform X1 [Juglans regia]	8.21	12.51	4.77	8.69	7.4	6.67	3.58	4.72	4.04	3.47	3.88	2.78	8.04	3.74
TRINITY_DN45502_c0_g1	K02150	-	1.91644	up	TKI1	TSL-kinase interacting protein 1 [Manihot esculenta]	9.16	13.33	15.63	15.99	14.58	9.66	5.53	5.29	4.01	3.92	3.5	4.39	13.06	4.44
TRINITY_DN45504_c0_g3	K04043	-	1.80362	up	-	heat shock 70 kDa protein, mitochondrial isoform X1 [Hevea brasiliensis]	135.38	183.57	68.44	133.76	111.33	134.67	48.74	67.08	51.78	42.96	37.37	40.29	127.86	48.04
TRINITY_DN45508_c0_g1	K00549	EC:2.1.1.14	-3.18858	down	METE	Methionine synthase II (cobalamin-independent) [Handroanthus impetiginosus]	0.13	0.98	0.42	0.46	1.24	0	3.45	2.14	1.92	2.3	2.58	5.92	0.54	3.05
TRINITY_DN45508_c0_g4	K00549	EC:2.1.1.14	3.37211	up	MS1	5-methyltetrahydropteroyltriglutamate--homocysteine methyltransferase [Prunus persica]	34.42	51.61	77.75	69.75	56.03	59.31	5.77	7.8	6.36	7.33	8.5	8.8	58.15	7.43
TRINITY_DN45511_c0_g6	K00789	EC:2.5.1.6	4.13952	up	METK1	S-adenosylmethionine synthase 2 [Ziziphus jujuba]	143.51	119.56	213.24	188.51	121.14	172.82	5.19	9.22	15.42	11.33	12.27	17.73	159.8	11.86
TRINITY_DN45511_c0_g7	K00789	EC:2.5.1.6	-1.7159	down	METK1	S-adenosylmethionine synthase 1 [Populus trichocarpa]	88.06	126.45	55.15	55.51	153.09	94.85	268.15	324.31	346.47	476.16	480.74	642.42	95.52	423.04
TRINITY_DN45511_c0_g9	K00789	EC:2.5.1.6	1.60036	up	METK5	S-adenosylmethionine synthase 5 [Cinnamomum micranthum f. kanehirae]	255.27	325.76	167.69	413.8	240	373.22	116.9	113.7	114.1	164.31	102.52	109.02	295.96	120.09
TRINITY_DN45520_c0_g2	K16190	EC:2.7.1.43	-1.22252	down	At1g20180	UPF0496 protein At1g20180 [Hevea brasiliensis]	0.93	1.11	1.09	0.65	0.86	1.24	1.23	2.26	2.82	3.01	2.28	1.72	0.98	2.22
TRINITY_DN45523_c3_g1	K00012	EC:1.1.1.22	1.02542	up	UGD1	PREDICTED: UDP-glucose 6-dehydrogenase 1 [Cucumis melo]	381.1	396.54	324.07	297.61	333.31	407.64	54.3	55.36	255.29	226.12	487.75	387.28	356.71	244.35
TRINITY_DN45526_c3_g2	K03113	-	1.55731	up	TIF	Eukaryotic translation initiation factor SUI [Parasponia andersonii]	1.1	1	1.51	1.67	2.05	1.88	0.56	0.55	0.55	0.6	0.86	1.6	1.54	0.79
TRINITY_DN45533_c4_g4	K01183	EC:3.2.1.14	3.00483	up	EP3	endochitinase PR4-like [Hevea brasiliensis]	314.4	178.09	270.32	184.5	264.56	462.52	21.74	12.67	109.16	24.21	53.38	54.76	279.06	45.99
TRINITY_DN45535_c1_g2	K00873	EC:2.7.1.40	-1.62568	down	OsI_37456	hypothetical protein Ahy_B09g098675 isoform A [Arachis hypogaea]	7.17	4.83	6.31	7.19	5.82	4.94	13.18	11.72	16.3	17.87	15.73	14.91	6.04	14.95
TRINITY_DN45536_c0_g2	K12867	-	-1.39317	down	PAP28	probable inactive purple acid phosphatase 28 isoform X1 [Manihot esculenta]	1.98	3	1.01	1.3	1.14	1.55	5	5.93	4.24	7.71	4.76	5.56	1.66	5.53
TRINITY_DN45538_c0_g3	K12189	-	-1.32075	down	VPS25	vacuolar protein sorting-associated protein 25 [Dorcoceras hygrometricum]	8.46	4.98	6.67	5.42	7.76	5.79	13.5	19.55	21.3	16.2	15.74	17.62	6.51	17.32
TRINITY_DN45553_c0_g2	K00921	EC:2.7.1.150	3.34979	up	FAB1B	PREDICTED: 1-phosphatidylinositol-3-phosphate 5-kinase FAB1B [Fragaria vesca subsp. vesca]	23.73	22.86	22.66	13.34	21.93	14.32	3.41	2.72	2.1	3.01	1.68	2.45	19.81	2.56
TRINITY_DN45556_c1_g2	K03115	-	-1.21705	down	CKB4	PREDICTED: putative casein kinase II subunit beta-4 [Vitis vinifera]	6.57	9.77	4.69	6.47	7.06	7.93	22.84	19.19	26.18	23.52	21.36	19.3	7.08	22.07
TRINITY_DN45557_c1_g1	K14570	EC:3.1.-.-	1.74232	up	-	hypothetical protein B456_002G186600 [Gossypium raimondii]	0.22	0.4	0.88	0.74	0.56	0.52	0.22	0.17	0.17	0.04	0.29	0.41	0.55	0.22
TRINITY_DN45562_c0_g4	K14411	-	1.27163	up	-	heterogeneous nuclear ribonucleoprotein 1 [Populus trichocarpa]	21.35	37.03	16.57	26.99	28.91	28.54	16.68	17.86	13.88	15.91	7.17	12.22	26.56	13.95
TRINITY_DN45565_c1_g1	K00012	EC:1.1.1.22	5.9393	up	UGD5	UDP-glucose 6-dehydrogenase 1 [Manihot esculenta]	12.78	10.29	29.29	17.05	10.73	16.61	0	0.06	0.35	0.23	0.7	0.74	16.12	0.35
TRINITY_DN45565_c2_g1	K00012	EC:1.1.1.22	1.26892	up	UGD1	UDP-glucose 6-dehydrogenase 1 [Citrus clementina]	101.25	93.76	98.14	92.7	91.91	123.02	11.9	10.73	59	53.32	117.8	82.7	100.13	55.91
TRINITY_DN45570_c0_g2	K01194	EC:3.2.1.28	7.31369	up	TRE1	trehalase isoform X3 [Jatropha curcas]	11.32	6.04	17.21	9.87	9.33	10.66	0.3	0.04	0.07	0.07	0.03	0	10.74	0.09
TRINITY_DN45570_c0_g3	K16221	-	1.61737	up	TCP19	transcription factor TCP9 [Jatropha curcas]	6.18	3.19	6.48	11.34	3.96	12.78	0.64	1.25	5.5	1.69	6.24	6.17	7.32	3.58
TRINITY_DN45576_c1_g1	K14009	-	1.34439	up	-	PREDICTED: uncharacterized protein LOC105113519 [Populus euphratica]	5.57	6.92	3.83	13.21	7.92	5.19	3.24	3.4	3.86	4.22	5.54	3.72	7.11	4
TRINITY_DN45579_c0_g1	K02335	EC:2.7.7.7	-1.24363	down	POLIA	PREDICTED: DNA polymerase I A, chloroplastic/mitochondrial-like [Populus euphratica]	3.45	4.54	3.84	3.72	5.78	4.1	11.52	11.83	11.32	16.37	13.16	13.54	4.24	12.96
TRINITY_DN45585_c1_g1	K07407	EC:3.2.1.22	-2.53146	down	AGAL3	Glycoside hydrolase, clan GH-D [Corchorus olitorius]	1.39	1.64	1.22	1.8	1.05	1.81	8.73	13.37	11.3	12.41	13.41	11.24	1.49	11.74
TRINITY_DN45586_c0_g1	K00145	EC:1.2.1.38	3.07764	up	At2g42690	phospholipase A1-IIdelta-like [Hevea brasiliensis]	27.93	23.29	21.26	21.09	22.65	21.48	2.31	2.56	3.57	3.95	3.95	4.8	22.95	3.52
TRINITY_DN45589_c1_g3	K12868	-	3.82971	up	-	PREDICTED: uncharacterized protein LOC105141207 isoform X1 [Populus euphratica]	94.06	111.57	86.41	61.41	77.29	67.42	10.31	9.79	9.4	13.32	14.55	10.06	83.03	11.24
TRINITY_DN45592_c0_g3	K00487	EC:1.14.13.11	3.07317	up	CYP73A13	trans-cinnamate 4-monooxygenase [Citrus clementina]	113.92	64.29	81.59	108.97	65.21	126.07	5.37	11.8	9.01	12.38	13.79	14	93.34	11.06
TRINITY_DN45592_c0_g6	K00799	EC:2.5.1.18	8.24032	up	PARA	tau class glutathione transferase GSTU17 [Populus trichocarpa]	255.38	67.46	86.91	75.29	86.73	148.85	0.45	0.64	0.57	0.81	0.27	0.29	120.1	0.51
TRINITY_DN45593_c0_g2	K10745	-	-1.32455	down	-	uncharacterized protein C12B10.15c [Jatropha curcas]	9.05	6.69	7.09	3.45	5.95	6.06	25.73	21.91	18.18	21.88	17.22	17.55	6.38	20.41
TRINITY_DN45595_c0_g5	K03635	EC:2.8.1.12	-2.18165	down	MOCS2	molybdopterin synthase catalytic subunit [Ricinus communis]	4.9	8.12	6.7	3.78	5.92	5	23.55	32.16	25.93	27.77	18.46	27.61	5.74	25.91
TRINITY_DN45601_c2_g2	K03065	-	1.55454	up	TBP1	26S protease regulatory subunit 6A A -like protein [Gossypium arboreum]	0.18	0.5	0.3	0.65	0.35	0.47	0.27	0.12	0.18	0	0.2	0.72	0.41	0.25
TRINITY_DN45603_c0_g1	K00942	EC:2.7.4.8	2.1572	up	GK-2	guanylate kinase 2 [Manihot esculenta]	15.21	16.13	12.45	15.28	15.88	15.17	0.77	1.01	8.03	3.99	7.88	8.14	15.02	4.97
TRINITY_DN45605_c1_g2	K00948	EC:2.7.6.1	-1.69916	down	PRS1	ribose-phosphate pyrophosphokinase 1 [Herrania umbratica]	1.37	1.61	0.49	1.75	1.5	1.49	5.72	6.55	4.28	4.38	6.41	6.62	1.37	5.66
TRINITY_DN45624_c1_g3	K10256	EC:1.14.19.6 1.14.19.22	3.59959	up	FAD2	microsomal omega-6-desaturase [Millettia pinnata]	122.4	132.29	80.08	113.81	108.9	122.16	6.88	7.84	13.77	16.41	11.83	16.17	113.27	12.15
TRINITY_DN45624_c1_g7	K10256	EC:1.14.19.6 1.14.19.22	6.54534	up	FAD2	delta(12)-fatty-acid desaturase FAD2 isoform X1 [Rosa chinensis]	241.24	75.57	251.93	143.49	132.71	183.03	1.89	1.93	3.43	1.48	2.18	3.67	171.33	2.43
TRINITY_DN45630_c0_g1	K14674	EC:3.1.1.3 3.1.1.13 3.1.1.4 2.3.1.51	1.62389	up	SDP1	triacylglycerol lipase SDP1-like [Herrania umbratica]	5.99	5.67	15.34	10.88	3.43	9.41	6.21	4.05	3.27	3.07	1.95	2.97	8.45	3.59
TRINITY_DN45630_c0_g2	K03541	-	1.72013	up	PSBR	hypothetical protein CDL12_06236 [Handroanthus impetiginosus]	4.16	3.18	4.75	5.79	5.51	5.32	1.55	1.41	1.56	0.98	2.8	3.07	4.79	1.9
TRINITY_DN45634_c5_g2	K03106	EC:3.6.5.4	-2.40576	down	FFC	Signal recognition particle 54 kDa protein, chloroplastic [Vitis vinifera]	12.81	13.55	15.62	23.55	16.05	8.16	86.58	81.28	55.13	47.46	46.29	51.34	14.96	61.35
TRINITY_DN45639_c0_g4	K10525	EC:5.3.99.6	1.30707	up	AOC	allene oxide cyclase, chloroplastic-like [Abrus precatorius]	163.55	90.96	64.25	85.25	33.85	140.27	38.11	39.72	44.64	47.87	90.53	75.24	96.36	56.02
TRINITY_DN45640_c1_g1	K01904	EC:6.2.1.12	-1.91376	down	4CLL7	4-coumarate--CoA ligase-like 7 [Hevea brasiliensis]	2.85	3.06	1.25	1.31	1.55	1.67	8.57	10.96	8.2	11.34	6.71	10.79	1.95	9.43
TRINITY_DN45642_c0_g4	K00387	EC:1.8.3.1	-1.06884	down	SOX	sulfite oxidase isoform X1 [Hevea brasiliensis]	17.2	25.9	16.84	17.07	24.17	20.48	63.07	63.86	53.38	53.06	45.53	51.43	20.28	55.05
TRINITY_DN45646_c0_g3	K13434	-	3.62634	up	ERF118	AP2/ERF domain-containing transcription factor [Vernicia montana]	4.56	2.27	16.53	2.78	2.33	4.93	0.16	0.39	0.8	0.45	0.99	1.04	5.57	0.64
TRINITY_DN45647_c0_g1	K05287	EC:2.7.-.-	-3.20613	down	SHH2	protein SAWADEE HOMEODOMAIN HOMOLOG 1-like [Hevea brasiliensis]	1.04	0.84	1.67	0.92	1.25	0.31	10.95	9.87	15.82	11.28	21.13	15.03	1	14.01
TRINITY_DN45659_c1_g2	K01873	EC:6.1.1.9	1.41931	up	-	hypothetical protein ZEAMMB73_Zm00001d021725 [Zea mays]	22.53	34.81	33.59	30.08	36.48	32.94	33.74	32.8	20.57	22.48	17.08	20.36	31.74	24.5
TRINITY_DN45660_c0_g1	K01188	EC:3.2.1.21	-4.49121	down	BGLU4	PREDICTED: LOW QUALITY PROTEIN: beta-glucosidase 4-like [Malus domestica]	0.06	0.06	0.04	0.25	0.23	0.1	9.2	6.92	2.17	2.7	1.88	1.06	0.12	3.99
TRINITY_DN45664_c1_g1	K09828	EC:1.3.1.72 1.3.1.-	-1.09493	down	DIM	delta(24)-sterol reductase isoform X1 [Ricinus communis]	7.83	5.31	8.28	4.58	20.18	8.37	19.5	23.72	25.87	30.27	27.44	24.28	9.09	25.18
TRINITY_DN45665_c0_g1	K01934	EC:6.3.3.2	-2.81741	down	COG0212	hypothetical protein EUGRSUZ_F02694, partial [Eucalyptus grandis]	3.76	4.61	2.37	3.43	5.37	5.02	45.16	37.99	35.38	35.25	26.44	32.09	4.09	35.38
TRINITY_DN45679_c0_g11	K01611	EC:4.1.1.50	-3.54797	down	SAMDC4	S-adenosylmethionine decarboxylase proenzyme 4-like [Hevea brasiliensis]	0.14	0	0.4	0.15	0.26	0.41	8.6	5.21	2.38	3.22	1.82	1.09	0.23	3.72
TRINITY_DN45689_c0_g1	K00232	EC:1.3.3.6	3.04229	up	ACX1	PREDICTED: uncharacterized protein LOC105108760 [Populus euphratica]	8.48	7.95	28.67	10.9	5.19	10.45	0.59	0.58	3.87	1.65	2.59	2.46	11.94	1.96
TRINITY_DN45692_c2_g2	K13448	-	6.5458	up	BETVIII	PREDICTED: probable calcium-binding protein CML43 [Populus euphratica]	38.86	5.43	129.41	10.96	26.1	28.29	0.45	0.1	0.49	0.97	0.11	1.1	39.84	0.54
TRINITY_DN45699_c0_g3	K06215	EC:4.3.3.6	1.82163	up	PDX12	pyridoxal 5'-phosphate synthase-like subunit PDX1.2 [Populus trichocarpa]	30.41	32.82	10.88	19.69	46.76	25.05	6.06	7.44	10.38	11.5	12.1	12.34	27.6	9.97
TRINITY_DN45704_c0_g2	K01179	EC:3.2.1.4	3.39514	up	CEL1	endoglucanase 8 [Jatropha curcas]	2.7	2.49	14.27	4.05	20.28	9.18	0.56	0.86	1.93	1.06	1.38	1.12	8.83	1.15
TRINITY_DN45706_c0_g4	K12492	-	1.54594	up	AGD7	aspartate aminotransferase, partial [Prunus persica]	60.07	119.37	64.18	108.08	54.63	64.18	20.2	24.53	49.47	37	42.49	33.75	78.42	34.57
TRINITY_DN45707_c0_g6	K00660	EC:2.3.1.74	2.00893	up	-	chalcone synthase [Kandelia candel]	419.58	113.21	88.88	20.94	298.12	566.84	5.65	48.06	76.34	64.53	195.84	113.72	251.26	84.02
TRINITY_DN45711_c0_g1	K05284	EC:2.4.1.-	-1.55872	down	PIGM	GPI mannosyltransferase 1 [Ricinus communis]	5.29	3.93	2.08	4.63	5.09	3.17	18.32	16.67	13.9	19.32	11.89	12.63	4.03	15.46
TRINITY_DN45718_c0_g2	K13459	-	-2.0461	down	At5g63020	probable disease resistance protein At5g63020 [Jatropha curcas]	2.43	1.12	1.06	0.23	2.18	1.2	1.39	2.56	3.8	17.07	10.58	9.9	1.37	7.55
TRINITY_DN45723_c1_g1	K00655	EC:2.3.1.51	1.04728	up	LPAT1	1-acyl-sn-glycerol-3-phosphate acyltransferase, putative [Ricinus communis]	10.5	11.33	20.05	10.87	13.02	8.62	10.18	10.51	14.45	10.48	12.1	11.56	12.4	11.55
TRINITY_DN45728_c0_g1	K09753	EC:1.2.1.44	-1.3539	down	TKPR1	cinnamoyl-CoA reductase 1-like isoform X1 [Hevea brasiliensis]	16.31	12.93	8.53	5.96	16.13	14.79	31.64	35.67	41.54	43.66	46.27	51.65	12.44	41.74
TRINITY_DN45732_c0_g2	K03036	-	1.67774	up	MGS1	protein DOWNSTREAM OF FLC-like [Manihot esculenta]	118.93	104.23	135.02	85.35	182.98	169.62	14.62	22.17	88.54	62.44	60.99	83.7	132.69	55.41
TRINITY_DN45737_c0_g1	K03006	EC:2.7.7.6	-1.72214	down	At1g11820	flocculation protein FLO11 [Populus trichocarpa]	0.95	1.67	0.37	0.57	1.9	1.34	5.82	5.45	3.54	6.89	3.27	3.75	1.13	4.79
TRINITY_DN45740_c0_g1	K10756	-	-1.26734	down	RFC5	replication factor C subunit 3-like isoform X2 [Durio zibethinus]	9.69	10.6	9.94	8.55	7.01	7.32	29.39	29.39	29.94	26.9	24.49	27.05	8.85	27.86
TRINITY_DN45748_c0_g1	K09699	EC:2.3.1.168	-1.91905	down	BCE2	lipoamide acyltransferase component of branched-chain alpha-keto acid dehydrogenase complex, mitochondrial [Jatropha curcas]	3.83	4.79	2.71	3.22	3.11	2.63	15.81	14.95	18.23	14.95	19.17	18.23	3.38	16.89
TRINITY_DN45752_c0_g2	K10879	-	-2.01575	down	XRCC2	DNA repair protein XRCC2 homolog [Ziziphus jujuba]	1.71	1.36	1.79	0.78	0.85	0.54	7.12	6.56	4.37	6.54	5.48	6.36	1.17	6.07
TRINITY_DN45757_c3_g1	K03063	-	3.1389	up	RPT2	LOW QUALITY PROTEIN: root phototropism protein 2-like [Hevea brasiliensis]	111.67	397.05	59.69	114.93	139.31	170.98	23.32	33.01	14.26	27.65	17.66	22.27	165.61	23.03
TRINITY_DN45760_c0_g1	K11820	EC:2.4.1.195	-2.28064	down	UGT74B1	UDP-glycosyltransferase 74B1-like [Hevea brasiliensis]	0.43	1.11	1.1	0.37	0.41	0.35	3.53	4.32	4.24	3.8	3.55	4.3	0.63	3.96
TRINITY_DN45778_c0_g1	K16225	-	4.62531	up	WRKY30	probable WRKY transcription factor 53 [Hevea brasiliensis]	109.12	54.7	162	57.65	57.86	54.15	1.33	0.96	11.8	1.31	5.19	5.78	82.58	4.4
TRINITY_DN45778_c0_g4	K00799	EC:2.5.1.18	-2.15765	down	-	PREDICTED: glutathione S-transferase U10-like [Prunus mume]	0.31	1.13	1.78	0.65	0.85	1.81	9.07	6.57	5.14	10.44	4.05	4.39	1.09	6.61
TRINITY_DN45778_c0_g6	K16225	-	4.00422	up	WRKY53	probable WRKY transcription factor 53 [Hevea brasiliensis]	1.4	1.47	7.23	2.85	2.53	2.49	0.06	0.08	0.22	0.1	0.73	0.29	2.99	0.25
TRINITY_DN45786_c1_g4	K12834	-	-1.65992	down	At2g30000	PHF5 domain-containing protein [Cephalotus follicularis]	23.94	38.17	14.49	30.3	23.97	23	94.53	97.91	99.21	115.04	111.31	104.85	25.64	103.81
TRINITY_DN45788_c1_g1	K20457	EC:6.3.2.12	-1.463	down	DHFS	Folylpolyglutamate synthetase family protein isoform 1 [Theobroma cacao]	3.06	3.51	4.65	1.71	2.23	1.85	12.64	11.46	10.72	11.55	10.07	8.18	2.84	10.77
TRINITY_DN45790_c0_g1	K01490	EC:3.5.4.6	-2.21987	down	AMPD	AMP deaminase-like isoform X1 [Manihot esculenta]	3.04	5.63	2.86	10.36	2.53	2.25	17.47	19.8	17.58	18.6	27.54	17.92	4.45	19.82
TRINITY_DN45799_c0_g1	K01662	EC:2.2.1.7	-1.85707	down	-	probable 1-deoxy-D-xylulose-5-phosphate synthase, chloroplastic isoform X1 [Hevea brasiliensis]	2.77	2.74	2.43	2.02	1.99	1.06	10.08	7.36	11.73	11.48	10.51	10.71	2.17	10.31
TRINITY_DN45800_c0_g3	K20716	-	4.52201	up	Map3k1	mitogen-activated protein kinase kinase kinase 18-like [Manihot esculenta]	368.63	23.5	419.6	79.8	106.69	138.63	1.14	0.82	6.92	11.37	36.64	12.37	189.47	11.54
TRINITY_DN45805_c1_g3	K02968	-	-1.7934	down	RPS20	30S ribosomal protein S20, chloroplastic [Citrus clementina]	8.66	15.71	7.92	10.76	23.79	18.82	68.2	60.5	65	63.62	42.93	64.7	14.28	60.82
TRINITY_DN45809_c1_g1	K03063	-	-3.22148	down	At5g67385	BTB/POZ domain-containing protein At5g67385 [Manihot esculenta]	2.3	5.45	2.11	2.23	4.75	4.55	49.66	56.24	33.6	44.13	25.2	35.62	3.56	40.74
TRINITY_DN45830_c5_g9	K02912	-	1.46075	up	RPL32A	PREDICTED: 60S ribosomal protein L32-1-like [Nelumbo nucifera]	139.43	116.91	93.13	97.65	96.43	85.66	50.64	48.72	53.13	47.23	47.27	49.17	104.87	49.36
TRINITY_DN45833_c0_g2	K02132	-	5.31212	up	ATPA	F1-ATPase alpha subunit, partial (mitochondrion) [Rubus sp. JPM-2004]	31.26	6.64	66.17	8.54	10.48	10.77	1.1	1.2	0.64	0.56	0.36	0.65	22.31	0.75
TRINITY_DN45836_c0_g1	K01810	EC:5.3.1.9	-3.04792	down	OSB1	protein OSB2, chloroplastic-like [Hevea brasiliensis]	7.46	5.16	11.06	5.23	11.29	7.32	91.7	101.59	95.77	75.95	67.82	81.61	7.92	85.74
TRINITY_DN45839_c2_g1	K00939	EC:2.7.4.3	2.28949	up	At3g01820	probable adenylate kinase 7, mitochondrial [Hevea brasiliensis]	107.76	131.77	107.89	101.93	94.87	88.04	26.03	25.1	28.17	26.44	29.49	26.03	105.38	26.88
TRINITY_DN45839_c2_g4	K00939	EC:2.7.4.3	2.81415	up	At3g01820	probable adenylate kinase 7, mitochondrial [Hevea brasiliensis]	3.11	6.7	2.49	2.66	5.81	6.49	0.76	0.48	1.1	0.55	1.15	0.86	4.54	0.82
TRINITY_DN45841_c1_g1	K00588	EC:2.1.1.104	6.25168	up	CCOAOMT2	hypothetical protein DVH24_034257 [Malus domestica]	1157.18	569.14	1797.46	1384.72	1262.01	1027.45	14.66	24.9	29.86	17.16	14.92	22.06	1199.66	20.59
TRINITY_DN45844_c4_g4	K02147	-	1.51713	up	-	V-type proton ATPase subunit B2 isoform X2 [Hevea brasiliensis]	87.66	193.29	73.78	165.07	96.33	110.36	55.7	67.71	47.41	51.57	59.65	49.33	121.08	55.23
TRINITY_DN45847_c1_g2	K10532	EC:2.3.1.78	1.73655	up	-	heparan-alpha-glucosaminide N-acetyltransferase isoform X2 [Hevea brasiliensis]	7.67	13.41	11.9	11.45	13.5	10.73	3.7	6.34	3.93	4.42	4.25	3.31	11.44	4.33
TRINITY_DN45848_c0_g3	K02956	-	-1.23764	down	-	uncharacterized protein LOC111492906 [Cucurbita maxima]	7.12	6.82	4.5	5.91	6.53	6.61	21.18	20.16	20.82	20.86	16.83	16.92	6.25	19.46
TRINITY_DN45851_c0_g4	K10576	EC:2.3.2.23	1.60333	up	-	ubiquitin-conjugating enzyme E2-23 kDa-like [Manihot esculenta]	25.38	15.58	19.12	13.25	15.91	18.58	5.75	8.38	7.8	10.06	6.23	9.67	17.97	7.98
TRINITY_DN45862_c0_g3	K01674	EC:4.2.1.1	-1.31655	down	ACA1	alpha carbonic anhydrase 1, chloroplastic [Populus trichocarpa]	0.72	2.41	2.78	0.7	4.61	0.96	2.53	5.43	2.86	16.39	0.76	11.37	2.03	6.56
TRINITY_DN45865_c0_g2	K14486	-	-1.55124	down	ARF22	auxin response factor 16 [Citrus clementina]	0.91	1.43	0.94	0.9	1.9	0.52	4.6	5.22	3.28	4.61	3.67	4	1.1	4.23
TRINITY_DN45866_c1_g1	K00679	EC:2.3.1.158	4.74512	up	At5g03820	GDSL esterase/lipase At5g03810-like [Citrus sinensis]	1.63	2.57	1.37	4.19	6.76	5.24	0	0.07	0.06	0.38	0.28	0.16	3.63	0.16
TRINITY_DN45867_c0_g1	K00430	EC:1.11.1.7	1.25701	up	-	CCHC-type integrase [Populus trichocarpa]	54.04	103.13	69.69	107.34	68.75	40.83	46.02	52.3	41.03	62.15	35.57	51.96	73.96	48.17
TRINITY_DN45868_c1_g1	K02927	-	1.68789	up	UBA52	PREDICTED: ubiquitin-60S ribosomal protein L40-2 [Vitis vinifera]	0.55	6.32	12.61	8.15	7.33	10.86	1.68	2.48	1.94	2.38	5.54	5.92	7.64	3.32
TRINITY_DN45872_c0_g2	K02183	-	1.95647	up	CML45	probable calcium-binding protein CML45 [Ricinus communis]	0.93	0.58	2.72	0.52	4.5	4.44	0.86	0.3	0.46	0.8	1.48	0.81	2.28	0.79
TRINITY_DN45884_c0_g2	K03936	EC:1.6.5.3 1.6.99.3	2.36812	up	NAD9	hypothetical protein AXX17_ATUG02840 (mitochondrion) [Arabidopsis thaliana]	17.31	31.76	11.56	19.5	12.77	18.01	3.26	5.05	3.92	4.74	6.63	3.56	18.48	4.53
TRINITY_DN45886_c1_g1	K14595	EC:2.4.1.263	2.79931	up	AOG	abscisate beta-glucosyltransferase [Jatropha curcas]	207.95	101.02	351.72	288.92	82.72	132.82	1.35	4.12	36.81	32.34	113.89	56.56	194.19	40.84
TRINITY_DN45892_c0_g1	K00850	EC:2.7.1.11	-1.1238	down	PUP1	purine permease 3-like [Quercus suber]	3.39	2.09	1.79	2.85	4.48	3.38	6.88	5.28	8.76	10.56	10.14	9.23	3	8.48
TRINITY_DN45893_c0_g2	K08269	EC:2.7.11.1	-1.53823	down	ATG1C	serine/threonine-protein kinase ATG1c-like isoform X1 [Manihot esculenta]	2.31	3.53	1.76	2.3	2.23	1.79	10.45	9.28	7.15	9.06	6.89	9.54	2.32	8.73
TRINITY_DN45894_c1_g1	K14488	-	2.83762	up	SAUR50	PREDICTED: auxin-induced protein 15A [Vitis vinifera]	1.84	2.24	5.22	4.35	5.82	0.88	0.16	0.24	1.43	0.92	0.16	0.85	3.39	0.63
TRINITY_DN45900_c2_g1	K12309	EC:3.2.1.23	-2.05453	down	BGAL1	unnamed protein product [Brassica rapa]	0.44	0.38	1.36	0.46	2.19	0.82	8.05	5.87	4.94	6.25	2.27	4.05	0.94	5.24
TRINITY_DN45901_c0_g6	K01507	EC:3.6.1.1	-1.61948	down	-	pyrophosphate-energized vacuolar membrane proton pump isoform X1 [Hevea brasiliensis]	105.47	95.93	85.96	82	171.43	98.97	543.9	576.8	418.12	390.1	266	394.92	106.63	431.64
TRINITY_DN45903_c1_g4	K06688	EC:2.3.2.23	-1.67439	down	UBC20	ubiquitin-conjugating enzyme E2 20 [Populus trichocarpa]	2.81	2.19	1.97	1.67	2.5	1.54	16.14	5.84	7.97	12.52	1.87	9.79	2.11	9.02
TRINITY_DN45904_c0_g2	K01187	EC:3.2.1.20	3.42632	up	-	uncharacterized protein LOC7496080 [Populus trichocarpa]	3.5	5.98	8.31	5.9	3.01	6.37	0.29	0.25	1	0.51	1.28	0.58	5.51	0.65
TRINITY_DN45906_c4_g1	K00942	EC:2.7.4.8	3.47764	up	GK1	guanylate kinase 2-like [Hevea brasiliensis]	23.35	23.54	16.44	24.38	20.57	18.71	0.83	2.77	3.74	1.41	3.09	3.18	21.17	2.5
TRINITY_DN45909_c0_g1	K09487	-	1.91347	up	HSP90-5	heat shock protein 90-5, chloroplastic-like [Sesamum indicum]	0.35	0.32	0.64	0.6	0.42	0.63	0.13	0.1	0.08	0.04	0.21	0.32	0.49	0.15
TRINITY_DN45920_c0_g3	K19476	-	1.51492	up	DDB_G0289029	IST1-like protein [Manihot esculenta]	4.36	5.1	9.13	5.02	6.68	4.46	2.34	2.28	1.45	3.72	1.33	3	5.79	2.35
TRINITY_DN45922_c2_g5	K03113	-	4.71088	up	TIF	putative eukaryotic translation initiation factor SUI1 [Catharanthus roseus]	2914.27	2207.1	2644.72	2573.83	1831.38	1664.32	84.53	90.77	138.9	83.09	194.2	100.18	2305.94	115.28
TRINITY_DN45931_c2_g2	K18453	EC:3.6.1.13 3.6.1.18	-1.81679	down	NUDT23	nudix hydrolase 23, chloroplastic isoform X1 [Jatropha curcas]	1.77	1.76	2.23	2.35	3.12	2.33	10.27	11.28	10.71	12.15	8.54	10.94	2.26	10.65
TRINITY_DN45934_c0_g2	K09753	EC:1.2.1.44	-4.16448	down	-	cinnamoyl-CoA reductase-like SNL6 isoform X1 [Hevea brasiliensis]	4.86	3.69	3.76	2.71	4.61	3.52	113.2	103.07	79.52	113.38	56.56	88.59	3.86	92.39
TRINITY_DN45944_c0_g2	K04079	-	3.16369	up	HSP90-1	heat shock protein 83 isoform X2 [Hevea brasiliensis]	16.12	17.47	11.55	14.84	17.39	11.22	1.48	1.46	0.74	2.44	4.78	2.14	14.77	2.17
TRINITY_DN45948_c0_g1	K01214	EC:3.2.1.68	8.25811	up	IQM2	LOW QUALITY PROTEIN: IQ domain-containing protein IQM2-like [Hevea brasiliensis]	169.85	47.16	51.63	37.63	21.27	68.55	0.39	0.4	0.33	0.31	0.15	0.22	66.02	0.3
TRINITY_DN45957_c1_g1	K13448	-	1.68068	up	CML5	calmodulin-like protein 11-like, partial [Trifolium pratense]	2.76	2.22	3.65	2.39	4.73	6.52	2.03	0.31	3.67	0.88	1.37	1.04	3.71	1.55
TRINITY_DN45957_c2_g9	K16818	EC:3.1.1.32	5.36342	up	At1g06800	phospholipase A1-Igamma2, chloroplastic [Manihot esculenta]	1.7	0.55	12.41	1.73	0.58	2.23	0.04	0.02	0.18	0.99	0.05	0.16	3.2	0.24
TRINITY_DN45959_c0_g2	K10606	EC:2.3.2.27	-1.45624	down	Fancl	E3 ubiquitin-protein ligase FANCL isoform X3 [Manihot esculenta]	1.99	1.98	1.71	1.34	1.91	1.42	5.03	5.74	7.72	4.9	5.68	6.96	1.72	6
TRINITY_DN45973_c0_g1	K12309	EC:3.2.1.23	-2.02457	down	IDD12	protein indeterminate-domain 12 [Sesamum indicum]	0.61	0.34	0.43	0.5	1.53	0.43	6.12	5.39	2.3	2.66	3.26	2.5	0.64	3.7
TRINITY_DN45975_c0_g4	K13459	-	-2.18752	down	-	probable disease resistance protein At4g27220 isoform X1 [Populus trichocarpa]	3.52	3.87	3.09	3.83	3.55	2.21	23.6	21.01	21.34	17.84	15.9	19.21	3.35	19.82
TRINITY_DN45976_c1_g5	K13422	-	3.77504	up	BHLH30	transcription factor bHLH30-like [Hevea brasiliensis]	31.74	56.55	16.05	41.86	74.12	48.71	4.47	4.87	5.3	4.25	3.56	6.86	44.84	4.88
TRINITY_DN45977_c2_g1	K04392	-	1.50055	up	ARAC4	uncharacterized protein LOC110012291, partial [Sesamum indicum]	0.09	0.14	0.08	0.13	0.19	0.25	0.06	0.04	0.09	0.08	0.07	0.05	0.15	0.07
TRINITY_DN45977_c2_g3	K04392	-	-1.22251	down	ARAC9	RAC-like 9 isoform 1 [Theobroma cacao]	0.32	0.8	0.82	0.34	1.63	0.58	0.93	1.75	1.92	4.31	1.59	3.48	0.75	2.33
TRINITY_DN45978_c5_g1	K09584	EC:5.3.4.1	-1.59695	down	PDIL2-3	PREDICTED: protein disulfide isomerase-like 2-3 [Populus euphratica]	15.29	13.55	12.42	9.16	22.29	13.29	40.51	43.65	64.86	57.54	68.18	59.73	14.33	55.75
TRINITY_DN45979_c0_g2	K01079	EC:3.1.3.3	-1.47727	down	PSP	phosphoserine phosphatase, chloroplastic-like [Hevea brasiliensis]	2.74	3.57	2.82	2.46	2.63	2.59	15.04	11.85	9.64	7.52	6.58	8.09	2.8	9.79
TRINITY_DN45981_c0_g1	K12616	-	-1.13569	down	VCS	PREDICTED: enhancer of mRNA-decapping protein 4-like [Populus euphratica]	0.29	2.14	1.74	0.81	0.79	1.23	4.1	4.1	3.5	2.82	2.36	3.13	1.17	3.33
TRINITY_DN45983_c0_g1	K05663	-	-1.96821	down	ABCB25	hypothetical protein MANES_02G208800 [Manihot esculenta]	2.42	4.54	2.05	2.28	2.97	1.99	10.78	15	14.38	15.68	12.29	14.88	2.71	13.83
TRINITY_DN45993_c0_g1	K07541	-	-1.42122	down	-	phosphatidylinositol-glycan biosynthesis class X protein-like isoform X1 [Hevea brasiliensis]	7.36	6.12	5.44	5.9	8.87	4.75	25.72	23.38	30.72	28.73	19.52	29.37	6.41	26.24
TRINITY_DN46009_c2_g2	K13065	EC:2.3.1.133	-1.27778	down	-	uncharacterized protein LOC111282466 isoform X2 [Durio zibethinus]	4.84	13.13	7.59	15.6	18.26	9.58	37.67	32.83	37.38	38.83	28.75	39.71	11.5	35.86
TRINITY_DN46019_c0_g1	K14272	EC:2.6.1.4 2.6.1.2 2.6.1.44	-1.72213	down	GGAT1	glutamate--glyoxylate aminotransferase 2 isoform X2 [Manihot esculenta]	109.98	98.64	139.57	172.37	162.89	137.66	653.53	653.89	568.06	418.37	415.18	476.01	136.85	530.84
TRINITY_DN46019_c0_g6	K14272	EC:2.6.1.4 2.6.1.2 2.6.1.44	-2.69791	down	GGAT1	PREDICTED: glutamate--glyoxylate aminotransferase 1-like [Capsicum annuum]	0.25	0	0.08	0	0.15	0.08	1.7	1.67	0	1.74	0	0.08	0.09	0.87
TRINITY_DN46021_c0_g3	K01880	EC:6.1.1.14	-2.88096	down	At1g29880	PREDICTED: glycine--tRNA ligase, mitochondrial 1 [Theobroma cacao]	10.85	6.04	5.03	11.1	3.95	7.55	116.33	98.45	49.53	60.11	48.89	47.23	7.42	70.09
TRINITY_DN46021_c0_g6	K01880	EC:6.1.1.14	1.61758	up	At1g29880	glycine--tRNA ligase, mitochondrial 1 [Sesamum indicum]	0.15	0.14	0.17	0.28	0.31	0.21	0.08	0.09	0.04	0.05	0.12	0.18	0.21	0.09
TRINITY_DN46022_c1_g3	K00799	EC:2.5.1.18	1.82708	up	GST3	probable glutathione S-transferase [Rosa chinensis]	1	1.74	2.4	3.25	1.81	2.62	0.91	0.79	0.44	0.16	0.61	1.87	2.14	0.8
TRINITY_DN46023_c0_g1	K05666	-	-1.18043	down	ABCC1	ABC transporter C family member 2 [Ricinus communis]	25.16	26.51	16.89	15.96	16.83	19.11	52.83	73.95	61.05	58.65	50.47	54.87	20.08	58.64
TRINITY_DN46025_c0_g2	K02145	EC:3.6.3.14	3.87602	up	Vha68-2	V-type proton ATPase catalytic subunit A-like [Ziziphus jujuba]	12.9	9.21	5.74	6.96	3.82	3.96	0.52	1.64	0.17	1.02	0	0.17	7.1	0.59
TRINITY_DN46025_c0_g3	K02145	EC:3.6.3.14	1.12564	up	-	putative vacuolar H+-ATPase catalytic subunit A, partial [Populus alba]	3.76	3.06	0.67	2.44	1.84	2.85	1.01	0.15	2.38	2.96	1.83	2.12	2.44	1.74
TRINITY_DN46028_c1_g10	K16794	-	1.29839	up	JGB	protein JINGUBANG [Sesamum indicum]	0.13	0.29	0.27	0.27	0.28	0.28	0.07	0.04	0.08	0.23	0.17	0.21	0.25	0.13
TRINITY_DN46032_c0_g1	K13065	EC:2.3.1.133	2.88976	up	BAHD1	vinorine synthase-like [Manihot esculenta]	3.03	7.07	4.58	4.13	4.19	4.44	0.68	0.86	0.58	0.79	0.85	0.89	4.57	0.78
TRINITY_DN46037_c0_g3	K10532	EC:2.3.1.78	1.57858	up	Hgsnat	PREDICTED: heparan-alpha-glucosaminide N-acetyltransferase-like [Pyrus x bretschneideri]	4.75	9.77	8.96	8.74	7.35	10.1	4.69	4.05	2.64	3.59	2.99	2.84	8.28	3.47
TRINITY_DN46042_c0_g4	K01681	EC:4.2.1.3	-1.64118	down	ACO1	aconitate hydratase 1-like isoform X1 [Hevea brasiliensis]	9.58	13.62	7.13	8.94	12.47	8.87	39.65	44.8	43.87	35.73	32.29	43.02	10.1	39.89
TRINITY_DN46048_c0_g4	K00939	EC:2.7.4.3	-2.01462	down	At5g47840	PREDICTED: adenylate kinase, chloroplastic isoform X1 [Eucalyptus grandis]	6.06	6.95	3.43	5.14	5.21	5.42	22.51	23.17	28.21	34.08	34.57	34.9	5.37	29.57
TRINITY_DN46049_c0_g2	K01246	EC:3.2.2.20	3.0047	up	-	PREDICTED: uncharacterized protein LOC105120690 isoform X1 [Populus euphratica]	1.02	1.9	9.51	3.34	2.06	2.58	0.33	0.43	0.51	0.65	0.26	0.47	3.4	0.44
TRINITY_DN46050_c0_g2	K13667	EC:2.4.1.-	-1.71479	down	AGAP004267	O-glucosyltransferase rumi homolog [Hevea brasiliensis]	2.46	3.89	3.72	1.63	2.68	2.29	8.02	7.15	11.44	18.27	11.46	14.97	2.78	11.88
TRINITY_DN46050_c0_g4	K13667	EC:2.4.1.-	-1.8395	down	-	protein O-glucosyltransferase 1 [Populus trichocarpa]	2.95	2.61	3.07	0.9	2.82	2.04	6.54	9.36	10.27	15.01	12.2	16.29	2.4	11.61
TRINITY_DN46052_c0_g1	K20279	EC:3.1.3.36	-2.21085	down	IP5P3	type IV inositol polyphosphate 5-phosphatase 3 isoform X4 [Jatropha curcas]	1.29	1.18	1.81	0.84	1.65	2.13	8.52	9.36	9.43	9.25	8.88	8.54	1.48	9
TRINITY_DN46053_c0_g3	K09838	EC:1.14.15.21	-3.08688	down	-	monooxygenase 2 isoform X2 [Populus trichocarpa]	7.09	15.44	5.45	9.4	9.34	9.67	131.97	154.39	90.46	100.9	53.84	105.35	9.4	106.15
TRINITY_DN46060_c1_g1	K13126	-	6.83393	up	NAC030	PREDICTED: NAC domain-containing protein 7 [Populus euphratica]	9.92	1.53	13.35	2.38	4.2	6.17	0.04	0.16	0	0.11	0	0	6.26	0.05
TRINITY_DN46071_c0_g2	K15472	EC:1.14.13.121	2.03141	up	CYP71D13	cytochrome P450 71D95-like [Sesamum indicum]	0.1	0.26	0.21	0.31	0.41	0.45	0.12	0.05	0	0	0.11	0.34	0.29	0.1
TRINITY_DN46074_c4_g1	K12194	-	-1.25904	down	VPS32.1	PREDICTED: vacuolar protein sorting-associated protein 32 homolog 2-like [Gossypium raimondii]	2.89	6.49	7.07	8.36	4.57	2.98	9.81	11.14	10.64	9.13	10.38	10.09	5.39	10.2
TRINITY_DN46074_c4_g2	K12194	-	-1.09057	down	VPS32.1	vacuolar protein sorting-associated protein 32 homolog 2 [Morus notabilis]	6.66	10.74	7.52	8.33	10.01	8.04	23.41	25.97	23.69	24.38	25.28	24.82	8.55	24.59
TRINITY_DN46075_c0_g2	K15747	EC:1.14.-.-	-1.44896	down	CYP97B2	cytochrome P450 97B2, chloroplastic, partial [Manihot esculenta]	3.56	4.4	4.33	4.16	6.88	4.67	19.58	17.44	20.48	12.83	11.32	19.52	4.67	16.86
TRINITY_DN46076_c2_g1	K13412	EC:2.7.11.1	1.22416	up	CAMK2D	calcium-dependent protein kinase-like [Coffea arabica]	3.44	7.25	2.65	4.7	3.66	2.58	2.31	2.02	0.55	2.09	1.61	2.57	4.05	1.86
TRINITY_DN46078_c0_g3	K02985	-	-1.42384	down	RPS3C	40S ribosomal protein S3-3 isoform X1 [Manihot esculenta]	7.23	10.61	3.08	6.27	10.49	9.32	23.84	26.94	26.51	28.76	25.35	28.08	7.83	26.58
TRINITY_DN46082_c0_g1	K14509	EC:2.7.13.-	-1.64102	down	ETR1	putative ethylene receptor [Pyrus communis]	5.64	10.91	3.75	5.07	8.25	8.91	27.23	28.33	21.08	30.29	26.04	22.5	7.09	25.91
TRINITY_DN46087_c1_g4	K01853	EC:5.4.99.8	1.03552	up	OSCPNX1	cycloartenol synthase [Kandelia candel]	2.86	2.09	0.82	1.28	0.83	1.73	0.53	1.2	1.34	0.99	0.87	1.05	1.6	1
TRINITY_DN46094_c0_g1	K04035	EC:1.14.13.81	-3.0923	down	CRD1	Magnesium-protoporphyrin IX monomethyl ester (oxidative) cyclase [Handroanthus impetiginosus]	25.58	22.43	29.17	23.77	95.81	47.4	800.39	678.02	474.55	587.96	328.28	508.89	40.69	563.01
TRINITY_DN46107_c1_g1	K14497	EC:3.1.3.16	6.70922	up	Os05g0572700	probable protein phosphatase 2C 8 [Hevea brasiliensis]	19.61	24.39	64.43	54.63	85	48.75	0.17	0.39	0.72	0.66	0.92	0.87	49.47	0.62
TRINITY_DN46107_c1_g7	K14497	EC:3.1.3.16	3.6812	up	AHG1	probable protein phosphatase 2C 75 isoform X1 [Quercus suber]	3.54	13.54	12.9	21.25	24.01	13.22	1.92	1.35	1.36	2.07	2.18	0.26	14.74	1.52
TRINITY_DN46109_c1_g4	K14503	-	3.73906	up	BEH4	PREDICTED: BES1/BZR1 homolog protein 4-like isoform X1 [Populus euphratica]	101.06	100.42	73.83	110.12	91.93	96.08	8.79	8.67	6.58	13.62	8.26	7.07	95.57	8.83
TRINITY_DN46111_c0_g1	K00145	EC:1.2.1.38	-4.69007	down	At2g42690	hypothetical protein CISIN_1g014927mg [Citrus sinensis]	0.33	0.79	0.46	0.37	0.64	0.52	22.34	18.7	17.91	19.29	15.22	16.31	0.52	18.3
TRINITY_DN46114_c0_g5	K12486	-	2.03259	up	AGD12	ADP-ribosylation factor GTPase-activating protein AGD12 isoform X2 [Populus trichocarpa]	17.09	28.29	14.54	42.85	15.61	11.9	5.61	2.76	7.56	10.37	6.89	7.9	21.71	6.85
TRINITY_DN46115_c1_g1	K11584	-	3.63567	up	B'ETA	serine/threonine protein phosphatase 2A 57 kDa regulatory subunit B' theta isoform [Jatropha curcas]	150.22	184.13	155.91	179.07	141.44	122.22	5.79	6.34	24.95	12.04	23.83	24.4	155.5	16.22
TRINITY_DN46117_c0_g1	K13065	EC:2.3.1.133	-2.58876	down	HST	hydroxycinnamoyl-CoA:quinate hydroxycinnamoyltransferase [Erythroxylum coca]	9	19.53	9.3	13.38	14.71	13.48	32.06	38.58	126.72	67.86	186.82	144.62	13.23	99.44
TRINITY_DN46117_c0_g4	K13083	EC:1.14.14.81	3.31054	up	CYP75A1	flavonoid 3',5'-hydroxylase 2-like [Hevea brasiliensis]	117.41	104.35	201.43	100.07	251.47	270.4	0.85	2.66	20.99	51.52	32.26	30.98	174.19	23.21
TRINITY_DN46123_c0_g1	K01099	EC:3.1.3.36	-1.24371	down	IP5P15	type II inositol polyphosphate 5-phosphatase 15-like isoform X2 [Hevea brasiliensis]	5.73	7.5	3.55	4.52	3.27	3.69	11.73	13.21	13.45	12.7	14.96	13.62	4.71	13.28
TRINITY_DN46126_c0_g3	K13065	EC:2.3.1.133	5.03687	up	HST	shikimate O-hydroxycinnamoyltransferase-like [Hevea brasiliensis]	82.34	46.4	410.82	162.29	122.75	150.18	8	7.99	7.41	6.36	3.6	8.2	162.46	6.93
TRINITY_DN46139_c2_g4	K14486	-	-2.36809	down	ARF19	auxin response factor 19 isoform X1 [Jatropha curcas]	1.65	2.46	1.67	1.12	1.5	0.72	9.85	8.47	7.25	14.92	9.71	10.09	1.52	10.05
TRINITY_DN46148_c2_g4	K11093	-	1.03141	up	SNRNP70	U1 small nuclear ribonucleoprotein 70 kDa [Sorghum bicolor]	0.47	0.69	1.72	1.92	1.8	2.49	0.95	0.38	1.04	0.66	1.13	1.43	1.51	0.93
TRINITY_DN46153_c6_g14	K13424	-	5.0608	up	WRKY56	probable WRKY transcription factor 43 [Durio zibethinus]	1.17	0.2	5.15	1.2	1.75	3.16	0	0	0	0	0	0.38	2.1	0.06
TRINITY_DN46153_c6_g2	K13424	-	-1.13683	down	WRKY44	WRKY transcription factor 44 isoform X2 [Herrania umbratica]	4.36	4.79	1.65	3.18	5.26	6.44	8.16	13.12	15.99	10.43	16.24	9.61	4.28	12.26
TRINITY_DN46153_c6_g8	K18835	-	3.86772	up	WRKY75	probable WRKY transcription factor 43 [Populus trichocarpa]	4.27	0.96	6.3	0.96	2.17	1.95	0	0	0.19	0	0.19	1.08	2.77	0.24
TRINITY_DN46155_c0_g4	K01455	EC:3.5.1.49	1.93814	up	fmdA	uncharacterized protein LOC105158600 isoform X1 [Sesamum indicum]	0.32	0.29	0.56	0.83	0.54	0.33	0.33	0.33	0	0	0.28	0.35	0.48	0.21
TRINITY_DN46156_c1_g2	K13493	EC:2.4.1.-	-1.28197	down	UGT76F1	PREDICTED: UDP-glycosyltransferase 76F1-like [Populus euphratica]	0.57	1.38	2	0.91	1.67	0.9	4.42	3.95	3.11	4.76	3.17	4.35	1.24	3.96
TRINITY_DN46161_c2_g1	K02941	-	-1.79787	down	-	uncharacterized protein LOC110614401 [Manihot esculenta]	0.78	1.73	0.7	1.08	0.96	0.78	3.64	3.89	3.93	5.38	4.17	3.53	1.01	4.09
TRINITY_DN46168_c1_g2	K08963	EC:5.3.1.23	-1.27415	down	RCOM_0711420	methylthioribose-1-phosphate isomerase [Hevea brasiliensis]	11.32	7.55	5.29	6.05	5.33	6.24	30.79	23.68	20.28	17.69	16.01	25.72	6.96	22.36
TRINITY_DN46173_c1_g3	K02915	-	1.10121	up	RPL34	60S ribosomal protein L34 [Prunus persica]	4.81	3.4	3.87	4.97	5.84	6.1	2.11	2.31	2.96	3.14	4.09	3.17	4.83	2.96
TRINITY_DN46178_c1_g1	K10683	-	1.93038	up	KMT2B	hypothetical protein CDL15_Pgr002397 [Punica granatum]	0.62	1.48	0.54	0.89	0.72	0.49	0.28	0.62	0.18	0.34	0.08	0.26	0.79	0.29
TRINITY_DN46181_c1_g1	K11717	EC:2.8.1.7 4.4.1.16	-1.08415	down	NFS2	cysteine desulfurase 1, chloroplastic [Hevea brasiliensis]	6.09	11.71	10.95	8.83	16.15	10.87	24.82	25.08	30.73	25.83	22.24	25.95	10.77	25.77
TRINITY_DN46184_c2_g10	K03883	EC:1.6.5.3	1.3346	up	Mtnd5	NADH dehydrogenase subunit 5 [Mesostigma viride]	2.23	2.92	10.68	13.56	11.08	14.64	2.52	3.12	4.11	5.17	6.6	7.58	9.19	4.85
TRINITY_DN46184_c2_g6	K00412	-	1.15955	up	Mt-Cyb	apocytochrome b (mitochondrion) [Entransia fimbriata]	6.94	10.54	35	42.01	38.76	47.78	8.64	13.55	15.63	20.31	25.34	25.42	30.17	18.15
TRINITY_DN46186_c1_g2	K05278	EC:1.14.20.6	-3.61733	down	SRG1	codeine O-demethylase-like [Hevea brasiliensis]	10.51	14.84	13.06	10.47	9.06	11	182.78	198.54	178.21	146.25	189.63	191.86	11.49	181.21
TRINITY_DN46187_c1_g1	K00860	EC:2.7.1.25	-2.35133	down	APK1	adenylyl-sulfate kinase 3 [Ricinus communis]	6.59	15.14	7.33	12.32	11.33	9.63	75.21	70.3	62.87	65.28	57.3	67.52	10.39	66.41
TRINITY_DN46188_c5_g1	K11517	EC:1.1.3.15	1.96371	up	GLO2	Glycolate oxidase [Handroanthus impetiginosus]	10.19	5.64	23	16.43	16.61	10.99	2.16	3.54	5.43	2.52	1.91	4.7	13.81	3.38
TRINITY_DN46193_c3_g3	K13422	-	1.97068	up	MYC2	PREDICTED: transcription factor bHLH14 [Theobroma cacao]	5.74	1.36	2.28	1.72	0.73	4.81	0.68	1.82	0.43	0.89	0.68	1.05	2.77	0.92
TRINITY_DN46203_c1_g2	K01892	EC:6.1.1.21	4.38012	up	WRKY61	probable WRKY transcription factor 61 [Ricinus communis]	87.4	37.53	573.94	85.25	110.95	77.7	9.33	9.69	16.6	15.37	6.3	12.29	162.13	11.6
TRINITY_DN46203_c1_g5	K13424	-	3.68451	up	WRKY72	probable WRKY transcription factor 72 [Hevea brasiliensis]	0.67	0.19	4.9	0.92	1.35	1.03	0.03	0	0.1	0.1	0.03	0.72	1.51	0.16
TRINITY_DN46214_c1_g1	K08341	-	5.99562	up	ATG8H	autophagy-related protein 8i [Populus trichocarpa]	2.47	7.22	7.2	7.62	6.4	7.7	0.29	0.06	0.22	0.13	0	0.25	6.44	0.16
TRINITY_DN46226_c0_g1	K04649	EC:2.3.2.23	-1.28161	down	UBC27	ubiquitin-conjugating enzyme E2 27 [Momordica charantia]	16.17	20.83	14.01	12.35	18.48	16.55	47.87	53.4	49.23	48.52	52.16	46.53	16.4	49.62
TRINITY_DN46228_c0_g2	K13126	-	1.86599	up	PAB2	polyadenylate-binding protein 2-like [Sesamum indicum]	0.54	0.89	1.23	1.3	0.99	0.99	0.31	0.3	0.24	0.18	0.49	0.58	0.99	0.35
TRINITY_DN46230_c2_g3	K03257	-	-1.15934	down	-	PREDICTED: eukaryotic initiation factor 4A-11 [Cucumis melo]	2.28	2.83	5.44	3.51	3.12	2.33	8.52	10.63	7	9.07	8.18	8.87	3.25	8.71
TRINITY_DN46232_c0_g1	K06892	EC:1.14.11.-	4.51089	up	IQM4	IQ domain-containing protein IQM1-like isoform X1 [Hevea brasiliensis]	79.45	16.54	107.91	25.04	44.17	57.66	0.7	0.32	2.9	3.04	2.79	10.69	55.13	3.41
TRINITY_DN46232_c0_g2	K06892	EC:1.14.11.-	4.91312	up	IQM4	IQ domain-containing protein IQM1-like [Manihot esculenta]	57.3	15.7	86.79	21.93	35.87	44.29	0.33	0.24	2.03	1.23	2.36	5.8	43.65	2
TRINITY_DN46236_c0_g1	K20716	-	6.93772	up	mkkA	mitogen-activated protein kinase kinase kinase 18-like [Hevea brasiliensis]	50.81	11.2	205.05	42.17	43.35	70.66	0.74	0.29	1.28	1.52	0.23	0.77	70.54	0.81
TRINITY_DN46237_c0_g1	K14494	-	-2.11281	down	SCR	protein SCARECROW [Morus notabilis]	1.72	1.48	0.63	0.48	1.81	1.65	5.44	8.54	5.16	9.6	5.81	8.74	1.3	7.22
TRINITY_DN46239_c0_g4	K16903	EC:2.6.1.99	-1.9941	down	TAR2	tryptophan aminotransferase-related protein 2 isoform X1 [Populus trichocarpa]	0.52	0.82	0.19	0.64	1.1	0.67	3.87	4.19	3.32	2.69	2.6	3.31	0.66	3.33
TRINITY_DN46242_c2_g1	K13448	-	-2.21173	down	CML28	calmodulin-like protein 3 [Herrania umbratica]	0.26	0.37	0.54	0.86	0.78	0.13	1.91	3.16	2.16	4.48	2.66	3.8	0.49	3.03
TRINITY_DN46242_c3_g3	K20279	EC:3.1.3.36	-2.18835	down	IP5P3	type IV inositol polyphosphate 5-phosphatase 3 isoform X1 [Morus notabilis]	1.97	1.99	1.41	1.73	1.2	1.51	9.2	9.2	10.14	10.4	10.15	8.04	1.63	9.52
TRINITY_DN46246_c0_g3	K00276	EC:1.4.3.21	1.01056	up	-	uncharacterized protein LOC110630245 [Manihot esculenta]	23.46	20	5.67	9.69	16.8	11.29	5.12	5.38	7.26	15.42	10.16	11.65	14.48	9.17
TRINITY_DN46257_c2_g1	K10798	EC:2.4.2.30	-3.3228	down	PARP2-B	poly [ADP-ribose] polymerase 2-A [Manihot esculenta]	0.72	0.35	0.31	0.04	0.14	0.3	3.15	2.15	2.66	3.71	2.62	2.22	0.31	2.75
TRINITY_DN46266_c1_g1	K01872	EC:6.1.1.7	3.67814	up	-	TLC domain-containing protein 2 [Carica papaya]	8.51	8.54	4.67	8.01	6.47	9.17	0.56	1.18	0.68	0.98	0.88	0.26	7.56	0.76
TRINITY_DN46268_c0_g2	K02154	-	1.42922	up	VHA-a1	V-type proton ATPase subunit a1 [Hevea brasiliensis]	12.55	32.92	18.92	26.56	20.63	20.46	9.34	9.89	13.19	9.73	10.56	11.55	22.01	10.71
TRINITY_DN46275_c0_g1	K00109	EC:1.1.99.2	-4.56281	down	L2HGDH	FAD dependent oxidoreductase [Macleaya cordata]	1.2	1.24	0.9	0.49	0.64	0.29	13.13	11.22	8.03	9.78	7.97	10.29	0.79	10.07
TRINITY_DN46287_c0_g2	K19891	EC:3.2.1.39	1.31741	up	At2g27500	glucan endo-1,3-beta-glucosidase 14 isoform X1 [Jatropha curcas]	40.17	49.4	42	90.63	75.77	45.09	36.34	33.9	25.01	42.47	14.77	25.17	57.18	29.61
TRINITY_DN46293_c0_g1	K00012	EC:1.1.1.22	6.12547	up	UGD1	unknown [Picea sitchensis]	13.81	11.96	38.94	17.52	12.42	18.17	0.13	0	0.75	0	0.75	0.49	18.8	0.35
TRINITY_DN46293_c1_g1	K00012	EC:1.1.1.22	1.13001	up	UGD1	UDP-glucose 6-dehydrogenase 1-like isoform X1 [Hevea brasiliensis]	28.96	52.24	15.37	37.15	38.17	31.56	15.26	20.36	28.88	30.86	18.98	21.01	33.91	22.56
TRINITY_DN46295_c0_g1	K02637	-	2.51732	up	At1g27200	glycosyltransferase family 92 protein At1g27200-like [Hevea brasiliensis]	40.07	26.13	61.56	31.2	22.93	36.01	16.14	30.22	12.03	15.85	16.71	15.01	36.32	17.66
TRINITY_DN46297_c3_g2	K01051	EC:3.1.1.11	-3.82906	down	PME54	pectinesterase [Populus trichocarpa]	2.7	2.68	2.5	2.22	2.91	2.57	20.99	26.19	58.29	73.84	34.27	77.8	2.6	48.56
TRINITY_DN46300_c0_g2	K12885	-	1.20173	up	RZ1A	glycine-rich RNA-binding protein RZ1A [Hevea brasiliensis]	46.49	56.88	32.51	51.88	41.38	45.7	26.63	28.12	22.97	27.13	22.89	22.02	45.81	24.96
TRINITY_DN46302_c0_g2	K21026	EC:3.1.1.80	-4.75792	down	GLIP5	GDSL esterase/lipase 5-like [Manihot esculenta]	1.53	3.45	2.94	2.17	3.37	1.47	141.93	111.28	62.82	59.97	29.73	62.08	2.49	77.97
TRINITY_DN46307_c2_g1	K12599	EC:3.6.4.-	-1.45449	down	ISE2	hypothetical protein CISIN_1g001047mg [Citrus sinensis]	3.59	5.51	2.87	4.18	4.63	5.23	20.25	17.15	13.87	14.88	11.56	13.16	4.33	15.14
TRINITY_DN46309_c0_g1	K01934	EC:6.3.3.2	-1.14926	down	5FCL	hypothetical protein JCGZ_21736 [Jatropha curcas]	6.32	6.86	6.13	7.61	7.71	5.6	19.38	17.69	14.79	15.76	16.27	14.6	6.7	16.41
TRINITY_DN46316_c1_g1	K14272	EC:2.6.1.4 2.6.1.2 2.6.1.44	-1.2292	down	GGAT2	PREDICTED: glutamate--glyoxylate aminotransferase 2-like, partial [Cucumis melo]	211.55	250.17	294.5	269.24	315.54	267.99	1034.44	1058.36	910.32	794.95	688.98	788.25	268.17	879.22
TRINITY_DN46320_c0_g1	K20776	-	-1.52703	down	-	uncharacterized protein LOC105638174 [Jatropha curcas]	2.54	4.32	2.25	1.24	2.92	2.01	8.17	9.52	8.84	9.78	8.71	11.37	2.55	9.4
TRINITY_DN46323_c0_g1	K14484	-	3.18879	up	IAA11	auxin-responsive protein IAA11-like [Hevea brasiliensis]	50.76	52.63	51.21	38.04	48.18	40.48	3.55	6.78	4.95	4.96	7.11	5.15	46.88	5.42
TRINITY_DN46325_c3_g4	K03283	-	4.61007	up	HSP70	heat shock protein 70 [Kandelia obovata]	508.59	541.82	448.97	667.5	682.36	469.58	14.39	39.28	82.88	67.71	82.94	73.79	553.14	60.16
TRINITY_DN46330_c1_g2	K09680	EC:2.7.1.33	-1.2976	down	At2g17340	uncharacterized protein At2g17340 [Morus notabilis]	3.24	3.19	3.73	3.18	4.23	2.97	11.5	11.18	13.15	11.95	10.45	9.88	3.42	11.35
TRINITY_DN46332_c0_g1	K12897	-	-1.06043	down	SR45A	serine/arginine-rich splicing factor SR45a [Jatropha curcas]	10.75	9.97	8.07	8.36	9.07	9.57	24.88	22.13	19.68	20.6	19.61	19.7	9.3	21.1
TRINITY_DN46337_c1_g1	K20728	-	-2.46462	down	APS1	uncharacterized protein LOC112008917 [Quercus suber]	0.73	1.48	1.08	1.74	1.54	0.63	3.96	5.39	12.95	10.58	7.66	13.38	1.2	8.99
TRINITY_DN46338_c0_g1	K13989	-	-1.59008	down	DER1	derlin-1-like [Hevea brasiliensis]	7.56	16.1	7.49	5.87	9.4	8.39	29.24	36.87	36.23	31.81	34.39	38.79	9.13	34.55
TRINITY_DN46339_c0_g1	K10684	EC:6.2.1.45	-1.61268	down	SAE1A	SUMO-activating enzyme subunit 1B-1 [Jatropha curcas]	7.5	11.77	5.95	7.22	7.4	7.5	26.96	31.32	28.96	30.78	28.44	29.03	7.89	29.25
TRINITY_DN46339_c0_g2	K10684	EC:6.2.1.45	2.56802	up	SAE1B-1	hypothetical protein MANES_14G049500 [Manihot esculenta]	4.32	9.09	5.23	5.23	7.19	10.73	0.98	0.96	2.63	1.21	1.85	1.41	6.97	1.51
TRINITY_DN46340_c0_g1	K05857	EC:3.1.4.11	-1.06887	down	PLC2	PREDICTED: phosphoinositide phospholipase C 2-like [Erythranthe guttata]	12.16	28.97	22.18	45.59	19.08	17.71	21.64	22.54	110.81	38.52	81.47	64.29	24.28	56.55
TRINITY_DN46341_c2_g5	K03283	-	-3.04234	down	-	uncharacterized protein LOC18034726 [Citrus clementina]	1.05	7.75	0.27	1.17	0.36	0.28	24.99	22.36	15.89	15.15	14.06	10.95	1.81	17.23
TRINITY_DN46342_c1_g1	K21888	EC:1.8.5.1 2.5.1.18	10.3572	up	DHAR1	glutathione S-transferase DHAR2-like [Hevea brasiliensis]	3.79	6.38	14.73	15.12	19.01	6.58	0	0	0.04	0	0	0	10.94	0.01
TRINITY_DN46347_c1_g3	K20782	EC:2.4.2.58	-1.00999	down	HPAT1	hydroxyproline O-arabinosyltransferase 1 [Hevea brasiliensis]	10.37	11.76	7.35	8.28	15.03	8.66	22.73	22.36	27.76	27.72	28.5	29.1	10.24	26.36
TRINITY_DN46348_c0_g11	K01251	EC:3.3.1.1	3.23337	up	SAHH	Adenosylhomocysteinase [Macleaya cordata]	148.62	192.14	74.82	212.06	140.61	278.26	14.63	22.2	21.19	36.31	22.86	32.71	174.42	24.98
TRINITY_DN46353_c0_g3	K03860	-	2.57999	up	GASA1	GA-stimulated protein [Populus x canadensis]	22.1	37.19	176.08	53.92	126.12	43.99	5.73	15.35	19.32	27.73	12.76	26.18	76.57	17.84
TRINITY_DN46356_c0_g1	K20547	EC:3.2.1.14	4.98917	up	-	acidic chitinase [Elaeagnus umbellata]	15.49	0	17.11	5.39	5.37	10.59	0	0.83	0.82	0	0	0	8.99	0.27
TRINITY_DN46359_c3_g8	K09667	EC:2.4.1.255	1.95044	up	SEC	probable UDP-N-acetylglucosamine--peptide N-acetylglucosaminyltransferase SEC [Manihot esculenta]	17.36	23.08	12.67	15.62	16.08	15.4	5.32	5.34	5.2	7.07	5.52	5.15	16.7	5.6
TRINITY_DN46366_c1_g1	K03111	-	1.37408	up	-	PREDICTED: single-stranded DNA-binding protein, mitochondrial [Cucumis melo]	10.17	12.78	5.36	7.25	8.17	7.86	7.82	5.04	3.41	5.32	2.61	2.65	8.6	4.47
TRINITY_DN46367_c0_g1	K04354	-	-1.60866	down	OsI_006296	unnamed protein product [Coffea canephora]	9.69	9.16	5.81	4.15	8.03	5.65	18.54	26.14	20.65	31.15	29.45	23.99	7.08	24.99
TRINITY_DN46368_c1_g2	K01886	EC:6.1.1.18	-2.16173	down	OVA9	hypothetical protein GOBAR_AA11264 [Gossypium barbadense]	9.43	7.57	11.05	7.61	10.32	8.21	41.45	40.16	39.23	37.77	35.77	36.19	9.03	38.43
TRINITY_DN46369_c1_g1	K14432	-	1.20545	up	ABI5	protein ABSCISIC ACID-INSENSITIVE 5-like [Hevea brasiliensis]	15.88	18.59	7.37	10.03	12.55	10.38	15.37	14.34	14.56	19.26	13.07	14.94	12.47	15.26
TRINITY_DN46381_c2_g1	K01183	EC:3.2.1.14	1.49255	up	SD16	PREDICTED: cysteine-rich receptor-like protein kinase 4 [Juglans regia]	14.54	9.8	48.3	19.43	17.99	67.47	1.76	2.39	33.9	4.49	20.32	18.99	29.59	13.64
TRINITY_DN46381_c2_g4	K08905	-	1.85682	up	PSAG	uncharacterized WD repeat-containing protein C2A9.03-like [Sesamum indicum]	0.68	0.46	1.33	0.92	0.81	0.94	0.35	0.48	0.07	0.02	0.4	0.54	0.86	0.31
TRINITY_DN46383_c1_g1	K00549	EC:2.1.1.14	-1.3357	down	METE	PREDICTED: 5-methyltetrahydropteroyltriglutamate--homocysteine methyltransferase-like [Populus euphratica]	45.45	66.42	25.84	37.91	55.28	47.09	172.57	153.61	143.98	138.89	132.3	139.09	46.33	146.74
TRINITY_DN46384_c0_g2	K05019	-	-1.26533	down	At5g62290	chloride conductance regulatory protein ICln [Hevea brasiliensis]	2.22	1.26	0.93	1.84	1.61	1.08	4.35	4.11	3.56	4.18	5.11	3.39	1.49	4.12
TRINITY_DN46386_c2_g3	K06688	EC:2.3.2.23	-1.99708	down	ube2c	hypothetical protein TanjilG_11440 [Lupinus angustifolius]	4.09	6.78	5.5	5.23	7.58	5.47	29.17	30.97	33.62	29.9	49.42	38.2	5.77	35.21
TRINITY_DN46391_c1_g5	K09753	EC:1.2.1.44	1.18525	up	TKPR1	tetraketide alpha-pyrone reductase 1-like [Sesamum indicum]	0.36	0.56	0.85	0.69	0.88	0.78	0.36	0.1	0.38	0.13	0.3	1.14	0.69	0.4
TRINITY_DN46394_c0_g1	K14962	-	-1.78834	down	Wdr82	hypothetical protein JCGZ_10266 [Jatropha curcas]	2.24	2.89	0.72	1.7	3.81	1.31	12.22	13.09	10.47	8.59	10.59	9.68	2.11	10.77
TRINITY_DN46401_c0_g1	K01761	EC:4.4.1.11	-1.55936	down	MGL	methionine gamma-lyase [Jatropha curcas]	4.72	2.49	1.19	1.52	1.84	2.01	9.45	13.04	7.29	7.48	6.84	7.48	2.29	8.6
TRINITY_DN46402_c2_g2	K03363	-	6.83305	up	-	uncharacterized protein LOC110641587 [Hevea brasiliensis]	1430.3	893.78	4204.06	1235.14	1849.42	1494.98	29.26	26.47	25.23	6.92	17.71	30.95	1851.28	22.76
TRINITY_DN46412_c0_g1	K10754	-	-1.05409	down	RFC1	replication factor C subunit 1 isoform X3 [Jatropha curcas]	30.98	31.82	16.82	22.82	20.46	17.26	47.01	53.81	44.52	48.96	42.15	38.33	23.36	45.8
TRINITY_DN46414_c0_g4	K08653	EC:3.4.21.112	1.4035	up	SBT6.1	subtilisin-like protease SBT6.1 isoform X1 [Jatropha curcas]	15.03	18.38	9.1	16.98	11.39	12.48	6.35	7.5	6.62	7.7	6.5	5.69	13.89	6.73
TRINITY_DN46426_c0_g3	K08099	EC:3.1.1.14	7.37538	up	CLH1	chlorophyllase-1, chloroplastic-like [Hevea brasiliensis]	65.82	7.39	166.85	17.48	2.98	44.62	0.31	0.69	0.66	0.25	0.35	0.09	50.86	0.39
TRINITY_DN46427_c2_g1	K08081	EC:1.1.1.206	-1.9291	down	At5g06060	tropinone reductase homolog At5g06060-like [Manihot esculenta]	3.73	6.16	1.79	4.47	2.73	3.81	20.67	20.28	15.71	14.49	19.97	18.2	3.78	18.22
TRINITY_DN46429_c0_g2	K01206	EC:3.2.1.51	-1.51008	down	FUC1	alpha-L-fucosidase 1 [Jatropha curcas]	4.64	3.33	2.88	2.94	6.04	4.32	9.62	12.4	17.34	19.12	13.52	13.38	4.02	14.23
TRINITY_DN46432_c0_g3	K06167	EC:3.1.4.55	-2.55021	down	SPCC777.06c	putative hydrolase C777.06c [Manihot esculenta]	0.35	0.37	0.48	0.38	0.8	0.79	2.4	3.55	4.14	5.46	4.24	4.93	0.53	4.12
TRINITY_DN46437_c2_g1	K01087	EC:3.1.3.12	5.97785	up	TPPF	probable trehalose-phosphate phosphatase F isoform X1 [Hevea brasiliensis]	46.39	22.34	88.2	30.15	27.84	36.63	1.41	1.13	1.96	1.01	1.63	0.89	41.93	1.34
TRINITY_DN46451_c1_g8	K15397	EC:2.3.1.199	2.89566	up	KCS4	3-ketoacyl-CoA synthase 4 [Jatropha curcas]	51	35.1	70.14	58.61	40.04	57	7.38	7.21	13.97	8.05	13.05	16.01	51.98	10.95
TRINITY_DN46455_c0_g2	K16818	EC:3.1.1.32	-4.15167	down	At1g51440	LOW QUALITY PROTEIN: phospholipase A1-Igamma3, chloroplastic [Ricinus communis]	0.06	0.03	0.06	0.07	0.12	0.1	1.06	2.4	1.33	1.87	2.12	2.1	0.07	1.81
TRINITY_DN46461_c0_g2	K14649	-	2.36393	up	TAF8	transcription initiation factor TFIID subunit 8-like [Hevea brasiliensis]	12.83	16.68	8.91	13.98	13.51	8.49	3.59	3.59	3.15	3.5	1.97	2.46	12.4	3.04
TRINITY_DN46464_c0_g1	K13566	EC:3.5.1.3	-1.79961	down	NLP2	nitrilase-like protein 2 [Jatropha curcas]	7.26	5.17	6.67	3.8	6.25	5.6	23.74	26.79	27.3	21.92	30.71	24.29	5.79	25.79
TRINITY_DN46475_c1_g5	K12603	EC:3.1.13.4	1.77566	up	CCR4-1	carbon catabolite repressor protein 4 homolog 1 [Morus notabilis]	2.49	2.54	0.63	1.82	0.68	1.35	0.54	0.41	0.48	0.38	0.64	1.05	1.58	0.58
TRINITY_DN46477_c2_g4	K08266	-	-2.10827	down	pop3	Transducin/WD40 repeat-like superfamily protein isoform 2, partial [Theobroma cacao]	12.35	14.29	11.04	9.86	8.28	9.15	53.52	64.07	63.88	58.59	58.98	43.26	10.83	57.05
TRINITY_DN46478_c0_g8	K03094	-	1.72462	up	SKP1A	SKP1-like protein 1A [Manihot esculenta]	2.82	4.13	1.35	6.91	3.6	3.42	1.73	2.79	0.77	1.24	0.69	2.01	3.7	1.54
TRINITY_DN46480_c0_g6	K01640	EC:4.1.3.4	5.62089	up	HMGCL	hydroxymethylglutaryl-CoA lyase, mitochondrial isoform X1 [Sesamum indicum]	4.49	4.45	3.78	6.77	4.22	3.63	0.21	0	0	0.32	0.14	0	4.56	0.11
TRINITY_DN46484_c0_g1	K12130	-	2.00744	up	APRR5	two-component response regulator-like APRR9 [Sesamum indicum]	0.4	0.46	0.72	0.54	0.53	0.59	0.18	0.22	0.1	0.03	0.25	0.28	0.54	0.18
TRINITY_DN46484_c0_g4	K13606	EC:1.1.1.294	-1.05965	down	NOL	hypothetical protein MANES_10G072400 [Manihot esculenta]	9.88	14.17	8.79	12.26	20.08	11.52	35.02	31.7	34	34.58	36.68	36.29	12.78	34.71
TRINITY_DN46491_c0_g1	K12309	EC:3.2.1.23	-2.35216	down	IDD4	protein indeterminate-domain 5, chloroplastic-like isoform X2 [Abrus precatorius]	5.34	6.08	1.51	3.85	3.33	3.52	23.83	37.91	23.1	32.46	16.11	26.35	3.94	26.63
TRINITY_DN46503_c1_g1	K02293	EC:1.3.5.5	-1.35003	down	PDS1	phytoene desaturase [Citrus x paradisi]	7.55	13.36	7.57	8.44	17.2	10.87	29.65	46.15	36.73	32.7	47.35	34.66	10.83	37.87
TRINITY_DN46508_c0_g1	K00422	EC:1.10.3.1	-2.65806	down	-	polyphenol oxidase, chloroplastic [Morus notabilis]	62.81	87.42	19.15	83.89	93.94	97.8	661.67	627.46	604.93	479.57	703.23	490.09	74.17	594.49
TRINITY_DN46509_c1_g2	K14398	-	-1.61398	down	-	cleavage and polyadenylation specificity factor subunit 6 [Jatropha curcas]	3.3	5.41	4	5.68	4.79	3.6	22.54	24.33	18.94	16.65	10.36	11.72	4.46	17.42
TRINITY_DN46510_c2_g5	K12198	-	-1.95271	down	LIR1	uncharacterized protein LOC110622012 [Manihot esculenta]	947.64	883.57	614.66	990.47	646.81	669.81	7731.17	4882.79	4160.99	2924.32	2002.9	2456.62	792.16	4026.46
TRINITY_DN46512_c0_g1	K12896	-	2.20193	up	RS2Z32	serine/arginine-rich splicing factor RS2Z33-like isoform X1 [Hevea brasiliensis]	61.01	98.05	37.94	63.3	55.08	67.94	27.11	23.09	14.65	18.02	11.45	13.29	63.89	17.94
TRINITY_DN46519_c0_g1	K08967	EC:1.13.11.53 1.13.11.54	-2.96088	down	VIT_05s0020g04070	1,2-dihydroxy-3-keto-5-methylthiopentene dioxygenase 1 [Hevea brasiliensis]	1.4	2.11	2.89	1.88	3.21	1.3	36.34	37.53	33.79	34.35	30.4	26.17	2.13	33.1
TRINITY_DN46521_c2_g1	K14492	-	-1.54628	down	ARR9	putative A-type response regulator 7 [Populus x canadensis]	6.93	4.25	5.07	4.85	7.39	6.53	2.16	5.07	26.46	48.11	25.16	31.17	5.84	23.02
TRINITY_DN46529_c0_g2	K00006	EC:1.1.1.8	-1.55768	down	GPDH	glycerol-3-phosphate dehydrogenase [NAD(+)] [Hevea brasiliensis]	0.91	0.62	0.98	0.79	2.26	1.51	4.51	3.99	4.94	5.72	4.22	4.93	1.18	4.72
TRINITY_DN46540_c1_g7	K07432	EC:2.4.1.141	-2.57628	down	Alg13	PREDICTED: UDP-N-acetylglucosamine transferase subunit ALG13 homolog isoform X1 [Juglans regia]	3.97	3.22	2.92	2.34	5.58	3.44	25.32	28.39	27.07	29.95	24.47	26.78	3.58	27
TRINITY_DN46541_c2_g1	K20884	EC:2.7.1.26 3.1.3.102	-1.63731	down	SGPP	haloacid dehalogenase-like hydrolase domain-containing protein Sgpp [Populus trichocarpa]	0.52	1.31	0.62	0.76	0.93	0.78	4.16	4.36	3.48	3.39	1.52	2.42	0.82	3.22
TRINITY_DN46546_c0_g3	K03137	-	1.26003	up	-	PREDICTED: general transcription factor IIE subunit 2 [Populus euphratica]	66.26	65.72	68.46	69.43	56.23	54.96	51.89	40.96	36.8	31.63	28.2	38.1	63.51	37.93
TRINITY_DN46548_c0_g1	K03553	-	-1.07701	down	At3g10140	DNA repair protein recA homolog 2, mitochondrial isoform X1 [Manihot esculenta]	5.52	7.26	4.37	4.71	6.4	4.18	12.36	14.04	13.23	13.51	14.84	13.59	5.41	13.59
TRINITY_DN46552_c3_g3	K00943	EC:2.7.4.9	-1.29567	down	SPATA20	spermatogenesis-associated protein 20 [Ricinus communis]	16.33	17.66	10.58	12.43	12.12	11.36	36.65	43.25	41.32	42.75	40.67	44.87	13.41	41.59
TRINITY_DN46555_c0_g1	K13422	-	2.74502	up	BHLH25	transcription factor bHLH25 [Ricinus communis]	1.1	1.45	2.19	0.74	2.09	1.19	0.23	0.3	0.15	0.56	0.22	0.36	1.46	0.3
TRINITY_DN46557_c2_g11	K12823	EC:3.6.4.13	1.94414	up	RH46	DEAD-box ATP-dependent RNA helicase 14-like [Carica papaya]	272.3	405.6	209.21	429.42	274	256.65	144.12	135.49	112.89	84.24	71.33	82.39	307.86	105.08
TRINITY_DN46557_c2_g2	K12823	EC:3.6.4.13	1.40888	up	RH46	hypothetical protein MANES_15G149200 [Manihot esculenta]	20.62	10.89	18.6	14.78	7.7	13.62	10.5	11.41	8.31	13.54	4.54	6.03	14.37	9.05
TRINITY_DN46557_c2_g4	K13667	EC:2.4.1.-	-2.63651	down	-	O-glucosyltransferase rumi homolog [Quercus suber]	0.84	2.06	1.01	0.77	0.48	1.24	5.78	7.45	8.94	10.38	8.92	10.51	1.07	8.66
TRINITY_DN46558_c0_g1	K00475	EC:1.14.11.9	-3.33004	down	DLO1	protein DMR6-LIKE OXYGENASE 2-like [Rosa chinensis]	4.31	3.11	15.24	4.74	2.55	4.82	2.03	10.2	130.37	11.49	113.48	175.14	5.79	73.78
TRINITY_DN46558_c0_g2	K00495	EC:1.14.14.44	3.94177	up	CYP71A1	cytochrome P450 71A1-like [Hevea brasiliensis]	0.86	2.28	5.25	2.49	1.61	1.89	0.1	0.1	0.25	0.37	0.16	0.25	2.4	0.2
TRINITY_DN46558_c0_g6	K00495	EC:1.14.14.44	3.27292	up	CYP71A1	PREDICTED: cytochrome P450 71A1-like [Populus euphratica]	0.53	0.72	4.4	1.18	1.13	1.49	0	0.3	0.39	0.22	0.23	0.16	1.57	0.22
TRINITY_DN46560_c1_g3	K00616	EC:2.2.1.2	2.12778	up	tal	uncharacterized protein LOC110621208 isoform X2 [Manihot esculenta]	163.83	170.4	157.78	194.07	127.93	153.87	53.16	72.14	61.54	61.62	81.96	65.28	161.31	65.95
TRINITY_DN46566_c1_g2	K13354	-	2.6785	up	PXN	peroxisomal nicotinamide adenine dinucleotide carrier [Sesamum indicum]	46.62	30.62	28.39	27.45	23.3	25.58	2.66	4.59	6.43	7.44	6.68	14.38	30.33	7.03
TRINITY_DN46568_c1_g2	K03801	EC:2.3.1.181	-1.68451	down	LIP2	octanoyltransferase [Jatropha curcas]	4.52	7.16	1.82	7.54	8.31	10.29	28.35	27.21	16.39	25.78	17	19.27	6.61	22.33
TRINITY_DN46574_c0_g1	K08101	EC:1.3.7.4	-2.07011	down	HY2	phytochromobilin:ferredoxin oxidoreductase, chloroplastic isoform X1 [Citrus sinensis]	1.99	2.36	1.95	1.07	2.37	2.34	10.86	11.09	11.59	10.36	8.87	11.25	2.01	10.67
TRINITY_DN46586_c0_g1	K10610	-	-1.54896	down	DDB1A	DNA damage-binding protein 1a, partial [Carica papaya]	8.19	10.14	11.46	9.53	8.82	7.98	42.2	42.99	39	39.6	36.28	35.99	9.35	39.34
TRINITY_DN46590_c0_g4	K07179	EC:2.7.11.1	-1.1	down	rio2	serine/threonine-protein kinase rio2-like isoform X1 [Hevea brasiliensis]	15.83	21.32	14.81	18.2	18.15	15.65	57.26	58.16	46.75	43.11	40.52	40.3	17.33	47.68
TRINITY_DN46591_c0_g1	K00276	EC:1.4.3.21	-3.81949	down	AO1	primary amine oxidase [Populus trichocarpa]	2.83	1.97	1.19	0.54	1.3	1.38	38.38	37.19	19.34	26.46	22.16	27.47	1.54	28.5
TRINITY_DN46600_c1_g3	K11584	-	1.41763	up	-	PREDICTED: serine/threonine protein phosphatase 2A 57 kDa regulatory subunit B' theta isoform-like [Populus euphratica]	84.56	32.17	107.08	44.45	40.86	30.47	23.88	35.57	34.97	28.31	25.93	27.02	56.6	29.28
TRINITY_DN46600_c1_g4	K11584	-	4.53747	up	B'GAMMA	hypothetical protein TSUD_145950 [Trifolium subterraneum]	17.55	5.4	33.12	11.76	5.34	6.64	0.53	0.57	0.9	0.98	0.67	0.99	13.3	0.77
TRINITY_DN46602_c2_g3	K15631	EC:2.8.1.9	-1.34609	down	-	PREDICTED: uncharacterized protein LOC105137537 [Populus euphratica]	1.24	2.84	2.08	2.82	1.7	1.59	3.39	3.56	6.89	8.14	8.85	9.33	2.04	6.69
TRINITY_DN46603_c3_g2	K02876	-	-1.07338	down	rplO	uncharacterized protein LOC110627477 [Manihot esculenta]	14.09	29.48	7.99	21.73	13.95	17.12	49.01	48.19	43.85	46.25	41.89	49.12	17.39	46.38
TRINITY_DN46606_c0_g7	K01641	EC:2.3.3.10	1.20873	up	HMGS	hydroxymethylglutaryl-CoA synthase [Ricinus communis]	12.11	8.04	13.11	8.64	5.8	10.01	1.96	1.69	8.49	4.85	10.17	7.3	9.62	5.74
TRINITY_DN46608_c0_g5	K03236	-	1.34689	up	-	eukaryotic translation initiation factor 1A [Populus trichocarpa]	204.07	265.64	175.85	223.4	210.99	198.26	102.35	103.77	109.57	106.09	106.67	115.61	213.03	107.34
TRINITY_DN46612_c0_g4	K03868	EC:2.3.2.32	1.65685	up	GEM	GLABRA2 expression modulator [Jatropha curcas]	19.9	28.97	20.52	25.95	25.17	21.21	9.9	10.52	9.76	10.34	7.32	9.56	23.62	9.57
TRINITY_DN46620_c3_g7	K02723	-	1.87379	up	PSBY	photosystem II core complex proteins psbY, chloroplastic [Sesamum indicum]	0.79	0.6	2.05	2.08	1.76	2.24	0.96	0.51	0.14	0.07	1	0.7	1.59	0.56
TRINITY_DN46625_c0_g1	K00547	EC:2.1.1.10	-2.12849	down	HMT-2	PREDICTED: homocysteine S-methyltransferase 2-like [Populus euphratica]	15.83	19.73	27.79	16.02	34.05	20.78	179.73	172.04	110.37	125.54	82.15	101.72	22.37	128.59
TRINITY_DN46627_c1_g2	K00387	EC:1.8.3.1	-1.11774	down	SOX	Sulfite oxidase [Theobroma cacao]	6.48	10.46	5.87	7.37	9.98	5.99	24.01	23.36	18.52	18.13	21.7	21.47	7.69	21.2
TRINITY_DN46627_c1_g6	K13448	-	2.45792	up	CML41	PREDICTED: probable calcium-binding protein CML41 [Theobroma cacao]	27.56	6.24	16.13	7.02	18.35	18.04	0.99	1.86	3.99	3.76	6.77	5.43	15.56	3.8
TRINITY_DN46630_c0_g2	K01176	EC:3.2.1.1	1.36304	up	PCMP-E20	pentatricopeptide repeat-containing protein At4g18840-like [Quercus suber]	4.76	3.82	3.61	3.46	2.72	2.18	2.62	0.98	1.34	1.66	1.12	1.8	3.42	1.59
TRINITY_DN46640_c0_g3	K05666	-	-1.22776	down	ABCC12	ABC transporter C family member 12 isoform X1 [Populus trichocarpa]	2.47	2.13	1.3	1.95	1.58	1.03	6.51	6.57	4.69	5.15	3.32	5.18	1.74	5.24
TRINITY_DN46641_c0_g4	K13412	EC:2.7.11.1	-1.29986	down	CPK9	calcium-dependent protein kinase 29 isoform X2 [Manihot esculenta]	1.74	4.11	1.82	5.59	1.23	0.65	4.93	4.3	5.74	5.96	10.81	3.9	2.52	5.94
TRINITY_DN46642_c1_g1	K19891	EC:3.2.1.39	1.16804	up	At2g01630	glucan endo-1,3-beta-D-glucosidase-like [Hevea brasiliensis]	4.57	4.54	19.75	5.3	22.55	9.08	1.4	2.18	6.93	12.21	3.37	11.03	10.96	6.19
TRINITY_DN46651_c0_g1	K13024	EC:2.7.4.24	1.07419	up	Ppip5k1	inositol hexakisphosphate and diphosphoinositol-pentakisphosphate kinase 1 isoform X6 [Jatropha curcas]	22.43	20.02	20.15	22.38	25.42	18.19	18.48	11.66	16.86	11.07	6.97	15.06	21.43	13.35
TRINITY_DN46659_c2_g7	K16190	EC:2.7.1.43	2.95219	up	GLCAK1	glucuronokinase 1 [Ricinus communis]	4.93	5.78	10.48	6.3	6.77	5.3	0.81	0.87	1.79	0.76	1.94	1.16	6.59	1.22
TRINITY_DN46674_c2_g8	K01179	EC:3.2.1.4	-2.45169	down	At1g19940	endoglucanase 24-like [Prunus avium]	12.61	26.36	7.1	16.69	36.58	25.25	188.08	177.8	151.78	173.32	97.55	138.87	20.77	154.57
TRINITY_DN46681_c0_g1	K05275	EC:1.1.1.65	-3.51699	down	At1g06690	hypothetical protein B456_012G039500 [Gossypium raimondii]	2.36	4.23	7.01	3.92	4.28	3.71	90.93	78.89	70.97	64.28	66.87	71.39	4.25	73.89
TRINITY_DN46683_c0_g1	K02552	EC:5.4.4.2	-2.64158	down	ICS2	isochorismate synthase 2, chloroplastic-like isoform X1 [Hevea brasiliensis]	1.88	1.73	2.98	1.6	1.84	0.3	11.86	11.61	20.72	16.22	13.59	17.62	1.72	15.27
TRINITY_DN46686_c2_g6	K14516	-	6.87414	up	ERF1B	Ethylene-responsive transcription factor 1B, putative, partial [Ricinus communis]	16.21	3.29	15.37	5.98	4.96	15.48	0	0	0.3	0.06	0.3	0	10.21	0.11
TRINITY_DN46689_c0_g2	K05391	-	3.73138	up	CNGC1	cyclic nucleotide-gated ion channel 1-like [Hevea brasiliensis]	29.46	8.23	28.31	3.93	3.6	17.71	0.97	0.97	2.12	0.18	1.69	2.42	15.21	1.39
TRINITY_DN46691_c2_g7	K02698	-	-2.96975	down	PSAK	PREDICTED: photosystem I reaction center subunit psaK, chloroplastic [Capsicum annuum]	105.25	101.66	108.07	123.72	357.28	209.99	2334.29	1742.26	1745.74	1871.65	920.27	1693.75	167.66	1717.99
TRINITY_DN46695_c0_g1	K01051	EC:3.1.1.11	-4.13422	down	At5g28300	trihelix transcription factor GTL2-like [Hevea brasiliensis]	0.12	0.08	0	0.08	0.19	0.2	2.14	3.46	1.95	4.73	1.53	1.71	0.11	2.59
TRINITY_DN46696_c2_g3	K14677	EC:3.5.1.14	-1.49267	down	-	uncharacterized protein LOC107407544 isoform X1 [Ziziphus jujuba]	4.09	5.08	8.62	6.89	6.58	5.89	20.15	19.2	27.07	19.81	30.32	19.96	6.19	22.75
TRINITY_DN46706_c1_g3	K14516	-	9.88884	up	ERF1B	PREDICTED: ethylene-responsive transcription factor 1B-like [Populus euphratica]	147.95	29.25	51.59	87.32	34.24	143.17	0	0	0	0.24	0	0.25	82.25	0.08
TRINITY_DN46706_c1_g8	K14516	-	4.69774	up	ERF1B	ethylene-responsive transcription factor 1B-like [Manihot esculenta]	90.17	3.96	69.82	55.38	41.98	117.08	6.56	5.32	0	6.54	0.38	1.11	63.06	3.32
TRINITY_DN46713_c1_g3	K14009	-	4.84858	up	-	uncharacterized protein LOC8266249 [Ricinus communis]	2.59	3.39	11.67	3.83	2.32	4.36	0	0	0.44	0.46	0	0.29	4.69	0.2
TRINITY_DN46714_c4_g1	K00026	EC:1.1.1.37	2.93406	up	At3g47520	PREDICTED: malate dehydrogenase, chloroplastic-like isoform X1 [Populus euphratica]	15	22.98	7.47	23.46	21.91	23.94	2.07	2.56	3.94	3.4	3.9	2.85	19.13	3.12
TRINITY_DN46716_c0_g1	K05287	EC:2.7.-.-	-1.98832	down	-	uncharacterized protein LOC112489370 [Ziziphus jujuba]	0.74	0.77	1.15	0.85	1.1	0.66	4.08	5.23	5.16	6.02	4.3	5.19	0.88	5
TRINITY_DN46717_c0_g8	K09755	EC:1.14.-.-	3.96373	up	CYP84A1	LOW QUALITY PROTEIN: cytochrome P450 84A1-like [Herrania umbratica]	101.54	55.45	612.02	113.92	115.49	92.09	21.47	15.96	19.04	15.23	10.33	15.03	181.75	16.18
TRINITY_DN46720_c1_g1	K06269	EC:3.1.3.16	1.01542	up	Os03g0268000	hypothetical protein B456_011G270800 [Gossypium raimondii]	15.34	32.4	8.24	21.88	11.52	16.37	8.2	12.39	12.84	13.24	7.76	12.92	17.62	11.22
TRINITY_DN46722_c0_g7	K00789	EC:2.5.1.6	-3.04565	down	-	inter-alpha-trypsin inhibitor heavy chain H6 isoform X1 [Ricinus communis]	1.14	1.96	1.07	0.96	0.94	0.35	13.29	11.83	8.73	10.77	8.07	7.28	1.07	9.99
TRINITY_DN46723_c0_g1	K00432	EC:1.11.1.9	2.36426	up	CSA	PREDICTED: probable phospholipid hydroperoxide glutathione peroxidase [Prunus mume]	272.46	341.18	277.29	272.07	169.21	219.34	46.59	68.07	78.96	69.51	68.49	86.62	258.59	69.71
TRINITY_DN46733_c1_g5	K04714	EC:2.7.8.27	4.65666	up	IPCS1	phosphatidylinositol:ceramide inositolphosphotransferase 1-like [Hevea brasiliensis]	2.08	1.33	6.94	1.77	2.98	2.81	0.15	0.27	0.07	0	0.14	0.38	2.98	0.17
TRINITY_DN46740_c1_g5	K09503	-	1.57673	up	DNAJ1	dnaJ protein homolog [Sesamum indicum]	485.01	597.22	310.66	486.87	550.97	442.53	143.98	218.31	240.97	194.71	167.94	210.75	478.88	196.11
TRINITY_DN46740_c1_g8	K09503	-	1.45126	up	DNAJ1	dnaJ protein homolog [Sesamum indicum]	0.77	1.14	1.46	1.23	1.21	1.52	0.41	0.27	0.37	0.38	0.96	1.16	1.22	0.59
TRINITY_DN46740_c1_g9	K09503	-	1.04596	up	-	dnaJ protein homolog [Manihot esculenta]	76.64	102.79	24.75	72	68.79	60.07	40.08	60.73	37.36	45.47	30.83	36	67.51	41.75
TRINITY_DN46741_c0_g3	K13457	-	-1.24462	down	-	disease resistance protein RPM1-like [Hevea brasiliensis]	1.58	1.34	1.04	0.76	2.1	1.05	4.62	3.81	1.35	4.93	2.8	7.01	1.31	4.09
TRINITY_DN46743_c2_g1	K00901	EC:2.7.1.107	-1.52842	down	DGK1	diacylglycerol kinase 1 [Jatropha curcas]	5.08	8.53	3.86	4.07	4.07	4.19	27.56	28.7	19.25	29.4	23.03	24.22	4.97	25.36
TRINITY_DN46747_c3_g1	K02914	-	-2.84365	down	RPL34	50S ribosomal protein L34, chloroplastic [Abrus precatorius]	13.28	14.68	12.53	13.41	46.56	26.06	243.08	197.24	226.29	194.18	142.92	200.55	21.09	200.71
TRINITY_DN46747_c3_g2	K03517	EC:2.5.1.72	-2.22556	down	CSK	chloroplast sensor kinase, chloroplastic [Hevea brasiliensis]	4.14	3.12	6.1	3.58	4.82	2.62	25.18	25.73	24.86	26.43	22.06	24.39	4.06	24.77
TRINITY_DN46747_c3_g3	K00963	EC:2.7.7.9	-1.21947	down	UGP	UTP--glucose-1-phosphate uridylyltransferase [Citrus clementina]	42.91	36.66	27.05	27.66	21.91	26.79	115.41	85.98	101.69	87.12	92.95	86.89	30.5	95.01
TRINITY_DN46757_c1_g1	K00891	EC:2.7.1.71	-2.42374	down	SKL1	probable inactive shikimate kinase like 1, chloroplastic [Jatropha curcas]	4.07	7.56	10.66	7.45	10.35	8.56	69.97	63.62	56.49	54.89	50.76	51.77	8.11	57.92
TRINITY_DN46762_c1_g1	K00002	EC:1.1.1.2	4.27923	up	AKR4C9	aldo-keto reductase family 4 member c9-like protein, partial [Trifolium pratense]	3.05	3.3	3.05	3.5	1.23	1.99	0.15	0.12	0.05	0.96	0.16	0.2	2.69	0.27
TRINITY_DN46766_c1_g2	K04711	EC:3.5.1.-	-1.13117	down	Acer3	alkaline ceramidase-like [Hevea brasiliensis]	16.28	20.04	25.08	16.28	17.41	13.31	29.78	22.74	67.84	32	49.96	38.96	18.07	40.21
TRINITY_DN46775_c2_g7	K11584	-	6.34612	up	At3g13620	probable polyamine transporter At3g13620 [Hevea brasiliensis]	5.85	5.15	6.96	7.27	5.19	10.24	0	0	0.14	0	0.23	0.29	6.78	0.11
TRINITY_DN46775_c3_g1	K11584	-	5.02426	up	At3g13620	probable polyamine transporter At3g13620 [Hevea brasiliensis]	33.51	42.79	34.38	31.16	28.57	54.36	0.11	0.86	1.06	0.31	1.78	4.96	37.46	1.51
TRINITY_DN46782_c0_g1	K15747	EC:1.14.-.-	-1.23777	down	CYP97A3	protein LUTEIN DEFICIENT 5, chloroplastic isoform X4 [Jatropha curcas]	13.85	12.73	13.52	12.72	23.06	16.48	54.2	52.42	46.44	44.87	36.53	49.95	15.39	47.4
TRINITY_DN46784_c0_g1	K10803	-	-1.07393	down	XRCC1	DNA-repair protein XRCC1 [Jatropha curcas]	3.37	4.16	1.9	3.06	2.71	2.79	9.66	9.69	6.93	9.51	7.38	8.43	3	8.6
TRINITY_DN46792_c1_g2	K14432	-	1.23504	up	-	ABSCISIC ACID-INSENSITIVE 5-like protein 2 isoform X2 [Jatropha curcas]	29.43	52.33	15.28	35.06	23.72	17.8	12.21	12.73	16.35	12.86	12.93	13.16	28.94	13.37
TRINITY_DN46794_c1_g1	K01719	EC:4.2.1.75	-3.52857	down	UROS	uroporphyrinogen-III synthase, chloroplastic isoform X1 [Citrus sinensis]	0	0.83	0	0	0.18	0.19	3.84	4.57	1.59	3.42	3.18	2.51	0.2	3.19
TRINITY_DN46794_c1_g2	K01719	EC:4.2.1.75	-2.06893	down	UROS	uroporphyrinogen-III synthase, chloroplastic isoform X3 [Populus trichocarpa]	4.35	2.99	5.31	3.92	4.45	3.22	21.92	17.81	15.71	21.83	14.19	16.94	4.04	18.07
TRINITY_DN46795_c2_g1	K08678	EC:4.1.1.35	-1.54486	down	UXS3	UDP-glucuronic acid decarboxylase 6 isoform X1 [Durio zibethinus]	7.08	12.24	9.2	8.3	20	8.76	27.49	31.09	42.19	43.36	40.83	40.11	10.93	37.51
TRINITY_DN46803_c1_g1	K04523	-	1.35976	up	-	large proline-rich protein bag6 [Jatropha curcas]	20.18	33.43	13.17	27.01	21.07	23.79	18.26	19.45	14.12	13.92	12.29	13.19	23.11	15.2
TRINITY_DN46805_c1_g1	K01052	EC:3.1.1.13	1.25545	up	LIP2	Myzus persicae-induced lipase 1 [Theobroma cacao]	26.67	32.69	15.88	20.88	18.01	18.58	18.62	21.12	25.57	18.95	29.16	20.44	22.12	22.31
TRINITY_DN46806_c0_g5	K03097	EC:2.7.11.1	-1.17766	down	CKA4	casein kinase II subunit alpha-2-like [Hevea brasiliensis]	4.42	4.82	3.72	3.7	3.22	3.1	12.46	12.83	11.21	12.18	6.51	6.25	3.83	10.24
TRINITY_DN46808_c0_g1	K13345	-	-2.0422	down	PEX12	hypothetical protein POPTR_013G047800 [Populus trichocarpa]	3.09	3.45	3.38	2.87	4.46	3.21	11.87	12.06	17.27	15.74	19.3	18.01	3.41	15.71
TRINITY_DN46812_c0_g1	K02716	-	-2.15151	down	PSBO	oxygen evolving enhancer protein 1 precursor [Bruguiera gymnorhiza]	79.62	112.43	132.27	167.63	499.03	281.98	1651.95	1301.21	1170.29	1195.31	739.05	1092.72	212.16	1191.76
TRINITY_DN46816_c0_g3	K19891	EC:3.2.1.39	2.41811	up	-	PREDICTED: glucan endo-1,3-beta-glucosidase, basic isoform-like [Populus euphratica]	1032.58	584.61	710.36	380.8	594.36	506.24	45.28	54.69	464.24	29.78	210.64	123.07	634.83	154.62
TRINITY_DN46817_c1_g1	K01835	EC:5.4.2.2	-4.19772	down	PGMP	Phosphoglucomutase, chloroplastic isoform B [Glycine soja]	0.73	0.74	0	0	0.54	0.14	8.12	9.68	6.66	5.59	4.24	4.75	0.36	6.51
TRINITY_DN46818_c0_g2	K02993	-	1.19195	up	RPS7	RecName: Full=40S ribosomal protein S7	0.35	0.31	1.27	1.76	0.87	0.91	0.34	0.41	0.28	0.33	0.6	1.1	0.91	0.51
TRINITY_DN46831_c0_g2	K12825	-	1.24279	up	At1g14650	probable splicing factor 3A subunit 1 [Citrus clementina]	54.98	65.65	32.91	57.27	45.4	48.63	28.57	28.33	25.28	28.55	27.42	28.86	50.81	27.83
TRINITY_DN46836_c0_g1	K02964	-	1.32507	up	RPS18	predicted protein [Hordeum vulgare subsp. vulgare]	0.62	4.39	6.11	5.5	6.4	7.93	1.27	1.13	2.48	3.1	5.45	3.26	5.16	2.78
TRINITY_DN46838_c2_g2	K01255	EC:3.4.11.1	-2.37265	down	CYCP3-1	cyclin-U3-1-like [Durio zibethinus]	2.69	2.17	5.79	1.64	3.17	2.27	20.08	23.07	19.28	23.93	15.9	17.82	2.96	20.01
TRINITY_DN46839_c1_g1	K00511	EC:1.14.14.17	1.59157	up	SQE3	squalene monooxygenase-like [Manihot esculenta]	19.63	29.99	11.14	23.35	24.3	15.78	12.43	12.21	5.81	7.5	5.72	7.8	20.7	8.58
TRINITY_DN46843_c1_g5	K08679	EC:5.1.3.6	1.33624	up	GAE3	UDP-glucuronate 4-epimerase 3 [Sesamum indicum]	7.98	6.18	6.27	11.4	8.8	5.84	1.86	2.59	3.47	7.24	3.74	5.13	7.75	4
TRINITY_DN46844_c0_g3	K13081	EC:1.17.1.3	-1.52255	down	LAR	leucoanthocyanidin reductase-like [Durio zibethinus]	34.19	32.52	22.34	15.6	29.93	32.41	84.61	72.11	73.16	94.61	183.73	97.41	27.83	100.94
TRINITY_DN46846_c0_g1	K13800	EC:2.7.4.14	-3.65581	down	-	UMP-CMP kinase isoform X2 [Manihot esculenta]	0.84	1.22	0.47	2.11	0.85	0.78	16.75	16.75	14.53	18.58	15.82	11.86	1.05	15.72
TRINITY_DN46864_c2_g6	K13998	EC:1.5.1.3 2.1.1.45	-1.02344	down	THY-1	hypothetical protein DVH24_021433 [Malus domestica]	1.62	1.91	1.17	0.48	1.5	1.66	1.37	1.09	5.56	3.48	5.81	4.82	1.39	3.69
TRINITY_DN46866_c0_g4	K01870	EC:6.1.1.5	1.82175	up	OFP6	hypothetical protein MANES_11G165100 [Manihot esculenta]	1.02	0.53	6.47	1.05	1.75	1.44	0.53	0.82	0.82	0.73	1.18	0.82	2.04	0.82
TRINITY_DN46866_c1_g4	K01507	EC:3.6.1.1	-3.04595	down	-	uncharacterized protein LOC18107882 [Populus trichocarpa]	0.54	0.84	0.65	0.62	0.27	0.33	6.9	8.26	5.9	6.76	4.66	5.15	0.54	6.27
TRINITY_DN46873_c0_g2	K03943	EC:1.6.5.3 1.6.99.3	-1.64562	down	At4g02580	hypothetical protein CICLE_v10021811mg [Citrus clementina]	7.59	7.59	6.93	4.08	6.44	7.8	23.3	26.24	31.73	29.25	26.86	28.47	6.74	27.64
TRINITY_DN46877_c0_g1	K06689	EC:2.3.2.23	-1.44504	down	UBC9	Ubiquitin-conjugating enzyme E2-17 kDa [Dendrobium catenatum]	35.17	81.36	50.6	60.02	38.58	37.76	195.28	198.49	152.31	166.08	166.32	180.14	50.58	176.44
TRINITY_DN46877_c0_g2	K06689	EC:2.3.2.23	3.60388	up	UBC11	ubiquitin-conjugating enzyme E2-17 kDa [Jatropha curcas]	11.84	8.38	7.91	3.69	5.52	7.82	0.47	0.09	0.31	1.29	0.72	0.82	7.53	0.62
TRINITY_DN46877_c0_g4	K06689	EC:2.3.2.23	-2.88764	down	UBC10	hypothetical protein EUTSA_v10026967mg [Eutrema salsugineum]	3.25	3.47	0.52	1.14	2.32	1.15	29.2	28.44	9.08	18.46	12.16	10.66	1.98	18
TRINITY_DN46881_c1_g1	K03106	EC:3.6.5.4	-1.69196	down	FFC	PREDICTED: signal recognition particle 54 kDa protein, chloroplastic [Erythranthe guttata]	1.9	3.02	4.21	2.72	3.44	2.44	16.17	15.31	15.88	14	11.03	12.73	2.95	14.19
TRINITY_DN46884_c1_g1	K13508	EC:2.3.1.15 2.3.1.198	6.5206	up	GPAT3	probable glycerol-3-phosphate acyltransferase 3 [Hevea brasiliensis]	13.43	1.24	60.65	5.01	15.57	13.18	0.09	0.03	0.27	0.2	1.05	0.22	18.18	0.31
TRINITY_DN46886_c0_g1	K05894	EC:1.3.1.42	3.33137	up	OPR3	PREDICTED: 12-oxophytodienoate reductase 3 isoform X1 [Populus euphratica]	331.34	255.8	371.95	282.88	138.27	281.87	4.04	6.38	57.24	21.48	104.45	71.12	277.02	44.12
TRINITY_DN46894_c3_g2	K09562	-	-1.23471	down	FES1	uncharacterized protein LOC110621144 [Manihot esculenta]	14.57	19.99	13.79	14.32	19.97	12.73	54.15	50.9	44.66	45.98	41.21	44.37	15.9	46.88
TRINITY_DN46898_c0_g7	K03248	-	1.35721	up	Eif3g	PREDICTED: eukaryotic translation initiation factor 3 subunit G [Theobroma cacao]	180.44	242.94	82.72	169.47	144.63	166.77	81.99	86.79	77.71	87.41	72.74	82.54	164.5	81.53
TRINITY_DN46907_c4_g1	K03039	-	1.28369	up	RPN9B	hypothetical protein GW17_00006618 [Ensete ventricosum]	56.68	49.51	26.84	26.33	40.72	42.09	21.83	25.73	19.97	23.08	18.79	20.27	40.36	21.61
TRINITY_DN46917_c0_g2	K10798	EC:2.4.2.30	-2.92468	down	PARP2	poly [ADP-ribose] polymerase 2 [Hevea brasiliensis]	0.13	0.06	0.2	0.13	0.07	0.11	1.11	1.12	1.33	1.31	1.4	0.81	0.12	1.18
TRINITY_DN46917_c2_g1	K12309	EC:3.2.1.23	1.24961	up	IDD1	protein indeterminate-domain 2 isoform X1 [Jatropha curcas]	44.76	50.46	19.68	52.03	30.33	24.6	22.71	26.96	11.38	26.28	17.39	13.15	36.98	19.65
TRINITY_DN46926_c1_g2	K14015	-	2.08863	up	At2g47970	NPL4-like protein 1 isoform X1 [Populus trichocarpa]	68.6	87.78	36.46	84.71	49.49	63.55	14.67	18.61	16.68	24.7	19.52	21.09	65.1	19.21
TRINITY_DN46929_c1_g3	K00083	EC:1.1.1.195	4.0571	up	CAD9	probable cinnamyl alcohol dehydrogenase 9 [Jatropha curcas]	0.05	0	0.55	0	3.46	0.92	0	0	0	0.23	0	0.14	0.83	0.06
TRINITY_DN46934_c0_g2	K01097	EC:3.1.3.29	-2.7494	down	gph1	haloacid dehalogenase-like hydrolase domain-containing protein 3 [Manihot esculenta]	4.9	4.06	4.22	5.4	6.05	4.97	65.06	43.8	47.6	31.27	45.14	30.39	4.93	43.88
TRINITY_DN46936_c1_g2	K13339	-	1.21439	up	PEX6	PREDICTED: peroxisome biogenesis protein 6 [Gossypium arboreum]	46.91	32.23	93.72	46.83	53.74	46.78	25.87	20.46	20.55	23.09	21.28	23.28	53.37	22.42
TRINITY_DN46949_c2_g2	K00218	EC:1.3.1.33	-5.29448	down	PORA	protochlorophyllide reductase [Jatropha curcas]	1.11	1.05	0.71	1.2	2.05	1.13	102.77	81.74	42.44	65.53	29.2	38.09	1.21	59.96
TRINITY_DN46952_c4_g2	K03878	EC:1.6.5.3	1.81539	up	ND1	unnamed protein product, partial [Brassica rapa]	2.33	1.52	2.02	2.35	1.43	1.9	0.59	0.77	0.56	0.37	1.06	0.61	1.93	0.66
TRINITY_DN46952_c4_g4	K02261	-	1.40164	up	COX2	cytochrome c oxidase subunit II (mitochondrion) [Malus domestica]	7.26	6.3	5.17	8.29	5.67	9.73	3.97	3.36	2.73	2.96	4.35	3.39	7.07	3.46
TRINITY_DN46960_c0_g4	K01599	EC:4.1.1.37	-1.01699	down	HEME1	uroporphyrinogen decarboxylase 1, chloroplastic isoform X2 [Manihot esculenta]	10.82	14.12	8.41	11.75	15.01	11.98	31.64	27.45	35.23	32.22	28.24	30.44	12.01	30.87
TRINITY_DN46970_c2_g1	K02210	EC:3.6.4.12	2.20195	up	MCM7	DNA replication licensing factor MCM7 [Herrania umbratica]	0.98	0.71	1.29	0.75	1.74	1.19	0.08	0.46	0.21	0.36	0.09	0.65	1.11	0.31
TRINITY_DN46975_c1_g8	K13354	-	5.55263	up	PNC1	PREDICTED: peroxisomal adenine nucleotide carrier 1 [Eucalyptus grandis]	120.48	86.2	196.68	166.34	67.48	125.31	2.32	2.86	3.45	7.04	3.45	2.76	127.08	3.65
TRINITY_DN46976_c0_g1	K00927	EC:2.7.2.3	1.88904	up	-	phosphoglycerate kinase, cytosolic [Populus trichocarpa]	272.6	266.75	124.37	324.19	206.6	224.07	62.94	62.47	80.91	78.45	139.65	80.95	236.43	84.23
TRINITY_DN46980_c0_g1	K05658	EC:3.6.3.44	-1.1549	down	ABCI10	ABC transporter I family member 10, chloroplastic isoform X1 [Hevea brasiliensis]	1.28	2.35	1.78	2.31	2.45	1.16	5.64	3.92	3.81	4.43	3.73	4.16	1.89	4.28
TRINITY_DN46982_c0_g1	K01176	EC:3.2.1.1	1.5195	up	AMY2	probable alpha-amylase 2 [Sesamum indicum]	0.37	0.15	0.4	0.63	0.69	0.44	0.11	0.06	0.2	0.05	0.2	0.38	0.45	0.17
TRINITY_DN46982_c0_g2	K13422	-	-1.31407	down	NLP7	protein NLP7 [Ricinus communis]	1.29	1.41	1.69	1.55	1.66	0.99	3.25	3.26	6.29	3.68	5.7	5.56	1.43	4.62
TRINITY_DN46988_c0_g1	K12309	EC:3.2.1.23	3.38386	up	IDD2	protein indeterminate-domain 2 [Populus trichocarpa]	299.66	114.78	266.27	88.06	198.14	235.57	64.84	70.19	47.86	47.47	35.35	36.72	200.41	50.4
TRINITY_DN46996_c2_g2	K12486	-	-1.56326	down	-	uncharacterized protein LOC7490044 isoform X1 [Populus trichocarpa]	23.67	53.06	47.98	48.08	79.36	51.95	212.16	200.23	204.13	182.04	150.81	203.24	50.68	192.1
TRINITY_DN46999_c0_g3	K01183	EC:3.2.1.14	1.42719	up	-	hypothetical protein B296_00034178 [Ensete ventricosum]	0	0.65	1.07	0.78	0.98	0.53	0.37	0.52	0.31	0.15	0.21	0.35	0.67	0.32
TRINITY_DN47005_c1_g5	K11423	EC:2.1.1.43	1.45653	up	TRX1	unnamed protein product, partial [Vitis vinifera]	3.86	4.22	4.05	2.25	3.69	4.06	1.49	1.86	1.74	2.48	1.68	1.13	3.69	1.73
TRINITY_DN47005_c1_g6	K13412	EC:2.7.11.1	4.01191	up	CPK7	calcium-dependent protein kinase 8 [Ricinus communis]	64.08	68.9	83.3	69.89	65.77	64.02	4.39	4.18	6.69	6.33	6.13	6.04	69.33	5.63
TRINITY_DN47008_c0_g7	K20979	EC:3.1.7.11	2.37005	up	LIS	geraniol synthase, chloroplastic [Sesamum indicum]	1.38	0.81	0.48	0.96	0.75	0.91	0.02	0.2	0.18	0.07	0.4	0.44	0.88	0.22
TRINITY_DN47012_c0_g1	K09699	EC:2.3.1.168	-2.21977	down	MORF1	multiple organellar RNA editing factor 1, mitochondrial-like [Hevea brasiliensis]	8.67	11.19	4.43	9.36	6.36	7.51	52.58	53.21	45.98	49.96	44.83	48.24	7.92	49.13
TRINITY_DN47013_c0_g1	K01800	EC:5.2.1.2	-1.0207	down	-	zeta class glutathione S-transferase protein [Bruguiera gymnorhiza]	29.02	27.37	14.14	19.95	11.63	23.46	43.9	44.09	51.7	41.48	94.97	50.43	20.93	54.43
TRINITY_DN47026_c0_g4	K00130	EC:1.2.1.8	1.85865	up	ALDH10A8	betaine aldehyde dehydrogenase [Avicennia marina]	1.06	0.41	0.75	0.83	0.7	2.18	0.13	0.24	0.04	0.05	0.42	0.53	0.99	0.23
TRINITY_DN47033_c1_g6	K02978	-	-1.55998	down	RPS27B	hypothetical protein CDL15_Pgr024570 [Punica granatum]	73.17	85.25	66.94	63.05	89.79	77.84	278.33	301.2	293.22	283.69	265.41	298.64	76.01	286.75
TRINITY_DN47037_c0_g2	K13412	EC:2.7.11.1	1.12216	up	CPK4	calcium-dependent protein kinase 26 isoform X1 [Arachis duranensis]	54.1	103.78	48.3	69.07	47.87	61.78	35.29	36.44	45.48	37.42	41.26	43.92	64.15	39.97
TRINITY_DN47048_c0_g1	K05607	EC:4.2.1.18	-1.27232	down	At4g16800	probable enoyl-CoA hydratase 2, mitochondrial isoform X1 [Ricinus communis]	3.61	4.82	3.09	4.12	6.59	5.93	14.37	11.75	16.62	18.05	12.39	16.21	4.69	14.9
TRINITY_DN47054_c1_g2	K01054	EC:3.1.1.23	4.4051	up	CSE	caffeoylshikimate esterase-like isoform X1 [Hevea brasiliensis]	5.71	6.25	25.41	6.62	5.74	5.73	0.26	0.55	0.5	0.86	0.3	1.21	9.24	0.61
TRINITY_DN47054_c1_g3	K01054	EC:3.1.1.23	2.67009	up	CSE	caffeoylshikimate esterase [Jatropha curcas]	3.75	11.96	10.34	10.37	11.8	5.94	0.88	3.24	1.48	1.37	1.3	2.27	9.03	1.76
TRINITY_DN47055_c0_g2	K03231	-	-1.40546	down	atad1a	hypothetical protein TanjilG_27522 [Lupinus angustifolius]	16.13	20.55	12.28	11.03	14.18	11.99	47.4	70.15	48.35	62.1	46.85	51.83	14.36	54.45
TRINITY_DN47055_c0_g6	K03231	-	-1.42211	down	-	uncharacterized protein LOC111008871 isoform X6 [Momordica charantia]	8.31	13.73	10.29	10.92	8.4	9.46	32.35	36.17	36.13	37.55	48.44	29.6	10.19	36.71
TRINITY_DN47056_c0_g3	K05643	-	1.11747	up	ABCA1	ABC transporter family protein [Hevea brasiliensis]	55.39	74.97	33.78	50.22	27.97	48.72	27.37	27.94	26.5	27.8	31.05	26.46	48.51	27.85
TRINITY_DN47060_c0_g10	K14516	-	4.45674	up	ERF1B	Ethylene-responsive transcription factor 1B [Vitis vinifera]	124.12	28.03	91.14	44.36	36.33	93.24	0.99	0.58	4.19	8.59	9.24	7.86	69.54	5.24
TRINITY_DN47075_c1_g1	K13126	-	4.6791	up	NAC100	No apical meristem (NAM) protein [Corchorus olitorius]	20.67	9.73	17.04	10.02	7.64	16.81	0.12	0.55	1.1	1.42	0.48	1.39	13.65	0.84
TRINITY_DN47076_c0_g1	K02321	-	2.72066	up	At5g14285	PREDICTED: uncharacterized protein LOC18609696 [Theobroma cacao]	9.99	6.35	5.94	10.15	4.69	5.43	1.48	1.47	1.7	1.33	1.16	1.11	7.09	1.38
TRINITY_DN47087_c1_g2	K01092	EC:3.1.3.25	-1.08569	down	CURT1A	protein CURVATURE THYLAKOID 1A, chloroplastic [Populus trichocarpa]	187.31	178.79	170.15	192.82	333.79	240.21	707.78	586.73	635.15	610.57	430.31	579.75	217.18	591.72
TRINITY_DN47099_c1_g1	K01188	EC:3.2.1.21	-3.88781	down	-	Retrovirus-related Pol polyprotein from transposon RE1 [Vitis vinifera]	0.14	0.67	0.09	0.1	0.18	0.28	3.34	3.98	3.08	7.22	4.95	5.19	0.24	4.63
TRINITY_DN47101_c2_g1	K01193	EC:3.2.1.26	4.05361	up	CWINV1	beta-fructofuranosidase, insoluble isoenzyme CWINV1 [Jatropha curcas]	22.53	12.44	95.77	18.64	12.51	13.83	6.79	26.85	18.34	9.75	9.07	14.39	29.29	14.2
TRINITY_DN47106_c0_g4	K12472	-	-1.50424	down	-	hypothetical protein POPTR_007G063200 [Populus trichocarpa]	3.74	3.59	1.99	2.32	3.66	2.83	14.41	11.66	12.42	11.24	7.72	9.66	3.02	11.19
TRINITY_DN47112_c0_g1	K08496	-	1.96216	up	MEMB11	membrin-11 [Ricinus communis]	39.63	47.91	27.55	47.08	39.69	32.01	14.88	14.77	11.43	13.17	10.97	9.9	38.98	12.52
TRINITY_DN47117_c0_g2	K14486	-	-1.36897	down	ARF6	auxin response factor 6 [Citrus clementina]	15.11	11.55	7.94	10.68	6.37	8.49	27.45	28.24	31.63	40.24	35.6	33.28	10.02	32.74
TRINITY_DN47119_c2_g1	K01535	EC:3.6.3.6	-1.32962	down	DI19-1	hypothetical protein CICLE_v10016529mg [Citrus clementina]	22.43	38.19	13.73	23.92	19.95	21.19	94.66	83.31	78.27	63.68	67.92	66.39	23.23	75.7
TRINITY_DN47124_c0_g4	K04710	EC:2.3.1.24	5.47905	up	LAG2	LAG1 longevity assurance homolog 2-like [Manihot esculenta]	280.4	224.5	604.67	308.84	198.55	193.6	4.55	4.12	15.8	6.42	12.46	11.43	301.76	9.13
TRINITY_DN47128_c0_g4	K09555	-	5.53269	up	BAG3	ubiquitin domain-containing protein/BAG domain-containing protein [Cephalotus follicularis]	139.46	105.27	253.94	166.96	155.03	141.71	1.73	3.34	4.44	9.75	2.79	6.98	160.4	4.84
TRINITY_DN47130_c3_g2	K01213	EC:3.2.1.67	-1.62136	down	-	uncharacterized protein LOC110632247 [Hevea brasiliensis]	10.92	8.24	9.28	6.75	10.1	6.79	28.64	30.36	33.64	30.12	34.33	31.06	8.68	31.36
TRINITY_DN47133_c3_g1	K19891	EC:3.2.1.39	-2.26364	down	At1g11820	glucan endo-1,3-beta-glucosidase 1 [Ricinus communis]	0.79	1.51	2.5	1.5	2.48	1.48	5.24	5.66	10.11	12.2	13.57	15.35	1.71	10.35
TRINITY_DN47142_c2_g3	K00591	EC:2.1.1.114 2.1.1.64	-1.97671	down	COQ3	Methyltransf_23 domain-containing protein [Cephalotus follicularis]	9.99	15.41	9.22	5.79	10.06	8.48	32.87	33.4	38.03	29.89	46.31	42.67	9.83	37.2
TRINITY_DN47153_c0_g10	K08909	-	8.17445	up	CAB8	PREDICTED: chlorophyll a-b binding protein 8, chloroplastic [Nicotiana tomentosiformis]	0	0	7.7	0	4.98	0	0	0	0	0	0	0	2.11	0
TRINITY_DN47153_c0_g3	K08909	-	7.07144	up	CAB8	PREDICTED: chlorophyll a-b binding protein 8, chloroplastic [Nicotiana attenuata]	0	0	7.71	0	6.87	0	0	0	0	0	0	0	2.43	0
TRINITY_DN47153_c0_g7	K08909	-	2.21683	up	CAB8	chlorophyll a-b binding protein 8, chloroplastic [Sesamum indicum]	1.44	1.65	4.02	4.39	3.15	3.57	0.76	1.4	0.05	0.09	1.6	0.98	3.04	0.81
TRINITY_DN47160_c0_g1	K17108	EC:3.2.1.45	1.45488	up	-	non-lysosomal glucosylceramidase isoform X3 [Abrus precatorius]	23.25	20.77	22.38	24.84	22.29	17.25	10.93	10.87	8.92	10.19	10.35	10.81	21.8	10.35
TRINITY_DN47161_c0_g2	K14484	-	-1.72838	down	IAA16	auxin-responsive protein IAA16 [Populus trichocarpa]	17.27	33.84	13.47	29.29	34.31	32.29	122.58	139.29	97.63	131.83	110.54	93.15	26.75	115.84
TRINITY_DN47161_c0_g3	K14484	-	-2.24723	down	AUX28	auxin-responsive protein IAA16 [Populus trichocarpa]	2.89	2.79	5.96	2.07	2.07	3.6	14.73	14.85	10.71	50.25	16.34	18.24	3.23	20.85
TRINITY_DN47163_c1_g4	K02721	-	-1.36506	down	PSBW	photosystem II reaction center W protein, chloroplastic-like isoform X1 [Abrus precatorius]	703.3	817.8	519.33	860.79	2016.39	1305.06	4507.92	3861.97	3744.88	3681.81	2661.14	3464	1037.11	3653.62
TRINITY_DN47165_c0_g1	K01188	EC:3.2.1.21	-1.3372	down	BGLU5	beta-glucosidase 11-like [Quercus suber]	14.92	21.95	13.76	14.48	41.2	20.43	66.55	75.9	54.39	62.7	71.05	63.75	21.12	65.72
TRINITY_DN47167_c1_g6	K01762	EC:4.4.1.14	10.155	up	ACS3	1-aminocyclopropane-1-carboxylate synthase 8-like [Manihot esculenta]	2	0.42	6.75	4.51	2.52	3.04	0	0	0	0	0	0	3.21	0
TRINITY_DN47168_c0_g1	K04392	-	-1.57715	down	RAC4	hypothetical protein B456_008G297200 [Gossypium raimondii]	4.51	3.36	3.66	3.79	4.86	3.22	9.69	10.67	14.52	14.08	13.16	14.39	3.9	12.75
TRINITY_DN47176_c0_g1	K01187	EC:3.2.1.20	-1.35849	down	At1g30700	berberine bridge enzyme-like 8 [Populus trichocarpa]	6.81	2.55	1.27	1.54	2.2	1.84	0.5	0.86	8.36	15.89	15.12	14.36	2.7	9.18
TRINITY_DN47176_c0_g2	K02987	-	-2.8983	down	-	uncharacterized protein LOC110613980 isoform X2 [Manihot esculenta]	1.46	2.14	2.04	1.58	1.22	1.91	9.97	17.27	16.92	20.1	18.93	16.51	1.73	16.62
TRINITY_DN47193_c1_g2	K00679	EC:2.3.1.158	3.09623	up	PDAT1	phospholipid:diacylglycerol acyltransferase 1-like [Jatropha curcas]	21.34	34.62	8.58	23.33	28.16	23.21	3.2	1.67	3.52	3.72	3.33	5.76	23.21	3.53
TRINITY_DN47207_c1_g3	K05289	-	2.83614	up	GPAA1	glycosylphosphatidylinositol anchor attachment 1 protein [Populus trichocarpa]	34.23	24.16	43.05	21.26	25.4	35.73	3.96	7.06	6.81	7.49	5.43	3.07	30.64	5.64
TRINITY_DN47216_c1_g2	K05894	EC:1.3.1.42	1.22857	up	OPR2	12-oxophytodienoate reductase opr, putative [Ricinus communis]	5.99	9.34	9.7	8.43	5.91	9.03	2.55	2.96	5.41	3.49	8.77	6.73	8.07	4.99
TRINITY_DN47224_c0_g1	K14431	-	1.96555	up	-	U-box domain-containing protein 4 isoform X1 [Hevea brasiliensis]	32.76	44.57	27.74	57.06	40.03	28.22	11.6	12.12	12.27	15.93	11.37	12.92	38.4	12.7
TRINITY_DN47234_c1_g2	K14497	EC:3.1.3.16	4.11048	up	AIP1	probable protein phosphatase 2C 24 [Hevea brasiliensis]	1.56	9.41	11.53	8.34	18.64	8.47	0.1	2.05	0.42	0.09	0.79	0.87	9.66	0.72
TRINITY_DN47244_c1_g4	K07904	-	1.21895	up	RAB11C	Ras-related protein Rab2BV [Vitis vinifera]	14.51	15.97	8.34	15.57	12.34	12.97	5.73	9.11	5.41	10.63	6.46	8.61	13.28	7.66
TRINITY_DN47250_c1_g2	K08915	-	-3.74851	down	LHCB4.1	unknown [Zea mays]	0.14	0.15	0.41	0.3	0.26	0	9.24	8.22	2.4	1.22	0.7	1.23	0.21	3.83
TRINITY_DN47250_c1_g3	K08915	-	-2.8328	down	LHCB4.2	chlorophyll a-b binding protein CP29.1, chloroplastic [Ricinus communis]	47.59	48.87	43.76	54.47	131	71.81	919.64	640.33	517.24	598.29	457.09	545.67	66.25	613.04
TRINITY_DN47253_c0_g1	K00655	EC:2.3.1.51	-2.19073	down	MORF2	hypothetical protein MANES_12G132200 [Manihot esculenta]	47.22	57.35	27.37	42.23	51.8	47.27	353.04	309.16	292.51	263.64	199.13	237.39	45.54	275.81
TRINITY_DN47253_c0_g2	K00655	EC:2.3.1.51	-1.51302	down	MORF2	hypothetical protein MANES_12G132200 [Manihot esculenta]	52	63.51	43.88	61.01	66.21	66.32	387.01	368.87	259.33	279.36	221.29	281.2	58.82	299.51
TRINITY_DN47256_c1_g2	K00029	EC:1.1.1.40	1.17607	up	ME1	NADP-dependent malic enzyme-like [Hevea brasiliensis]	17.7	12.94	17.72	14.79	17.69	32.13	12.93	9.35	10.69	13.7	13.48	8.74	18.83	11.48
TRINITY_DN47257_c0_g5	K12184	-	5.58829	up	-	vacuolar protein sorting-associated protein 28 homolog 2 [Manihot esculenta]	0.7	1.85	3.08	1.55	1.27	1.39	0.07	0.02	0.04	0.02	0.07	0.02	1.64	0.04
TRINITY_DN47261_c3_g2	K01184	EC:3.2.1.15	-1.79431	down	GSVIVT00026920001	probable polygalacturonase [Manihot esculenta]	1.8	3.99	1.64	0.67	2.86	1.85	6.56	6.93	9.09	9.97	8.97	14.36	2.13	9.31
TRINITY_DN47262_c0_g1	K08516	-	1.82277	up	YKT61	PREDICTED: VAMP-like protein YKT61 [Nicotiana sylvestris]	184.86	237.12	128.56	207.96	171.72	163.85	55.97	54.88	72.15	83.92	63.17	83.08	182.34	68.86
TRINITY_DN47264_c1_g7	K01915	EC:6.3.1.2	-1.49086	down	-	PREDICTED: glutamine synthetase cytosolic isozyme 1 [Nelumbo nucifera]	361.23	316.31	325.5	303.43	631.06	423.3	1285.91	1470.07	1442.53	1502.72	1416.43	1976.39	393.47	1515.68
TRINITY_DN47277_c1_g1	K14190	EC:2.7.7.69	2.05807	up	VTC2	GDP-L-galactose phosphorylase 1 [Prunus persica]	263.65	344.78	202.33	199.36	200.53	312.72	70.77	73.29	64.42	90.73	75.21	79.06	253.9	75.58
TRINITY_DN47280_c3_g3	K04354	-	-1.35932	down	Os06g0563300	serine/threonine protein phosphatase 2A 55 kDa regulatory subunit B beta isoform [Ziziphus jujuba]	12.2	14.28	7.24	4.72	9.33	8.92	31.92	32.94	27.58	31.64	32.29	31.97	9.45	31.39
TRINITY_DN47281_c0_g1	K20538	EC:2.7.11.24	1.00971	up	MPK18	mitogen-activated protein kinase 19-like isoform X1 [Hevea brasiliensis]	38.55	61.46	23.21	49.27	38.72	38.3	27.53	28.27	21.48	23.99	16.11	19.97	41.59	22.89
TRINITY_DN47292_c0_g4	K14516	-	8.90237	up	ERF1B	ethylene-responsive transcription factor 1B [Populus trichocarpa]	10.42	5.14	3.45	4.03	4.61	12.81	0	0	0	0	0	0.06	6.74	0.01
TRINITY_DN47297_c0_g6	K07375	-	3.8377	up	TUBB3	beta-1 tubulin [Dendrobium catenatum]	0	0	2.08	1.61	1.61	2.08	0.14	0.13	0	0	0.27	0.26	1.23	0.13
TRINITY_DN47300_c1_g1	K05906	EC:1.8.3.5 1.8.3.6	-1.23064	down	FLCY	farnesylcysteine lyase [Hevea brasiliensis]	5.03	6.97	3.91	4.17	3.71	3.18	11.76	12.11	12.48	13.28	12.11	15.06	4.5	12.8
TRINITY_DN47301_c3_g1	K16818	EC:3.1.1.32	8.34327	up	At4g16820	phospholipase A1-Ibeta2, chloroplastic [Ricinus communis]	99.36	7.07	125.21	33.77	29.33	61.92	0.32	0.15	0.33	0.17	0.16	0.26	59.44	0.23
TRINITY_DN47302_c1_g2	K00627	EC:2.3.1.12	1.30971	up	At1g54220	Dihydrolipoamide acetyltransferase, long form protein isoform 2 [Theobroma cacao]	63.35	64.12	47.9	53.95	50.26	37.52	23.44	33.07	27.39	28.11	29.67	26.81	52.85	28.08
TRINITY_DN47303_c0_g1	K07573	-	-1.89648	down	-	uncharacterized protein LOC110825275, partial [Carica papaya]	15.56	8.74	13.95	18.67	17.03	15.33	48.95	44.54	39.76	45.12	25.49	48.38	14.88	42.04
TRINITY_DN47309_c0_g2	K01866	EC:6.1.1.1	-1.24482	down	EMB2768	tyrosine--tRNA ligase, chloroplastic/mitochondrial [Jatropha curcas]	6.47	8.12	2.24	4.28	4.72	4.07	16.01	15.69	15.04	16.12	12.03	13.8	4.98	14.78
TRINITY_DN47310_c0_g1	K08912	-	4.85343	up	CAB3C	PREDICTED: chlorophyll a-b binding protein 40, chloroplastic-like [Nicotiana tomentosiformis]	0	0.32	26.42	0	23.14	0.28	0.61	0.3	0.3	0.87	0.3	0.59	8.36	0.49
TRINITY_DN47310_c0_g3	K08914	-	-3.73242	down	CAB13	chlorophyll a-b binding protein 13, chloroplastic [Populus trichocarpa]	9.87	11.57	16.14	23.45	80.13	30.89	646.43	455.19	487.36	633.43	289.31	514.76	28.68	504.41
TRINITY_DN47310_c0_g4	K08914	-	-3.56021	down	CAB13	chlorophyll a-b binding protein 13, chloroplastic [Citrus clementina]	0.05	0.29	0.28	0.71	0.31	0.38	7.34	7.29	4.05	5.92	3.3	2.81	0.34	5.12
TRINITY_DN47319_c0_g1	K00801	EC:2.5.1.21	-1.42479	down	-	squalene synthase [Bruguiera gymnorhiza]	29.23	50.4	27.18	49.55	29.3	34.62	127.82	131.11	83.65	94.67	134.34	88.13	36.71	109.95
TRINITY_DN47322_c2_g3	K01051	EC:3.1.1.11	3.43485	up	-	21 kDa protein-like [Hevea brasiliensis]	6.9	9.76	13.33	14.21	11.11	11.74	1.2	1.24	2.72	1	0.8	1.07	11.17	1.34
TRINITY_DN47328_c1_g7	K02940	-	2.0072	up	RPL9	60S ribosomal protein L9-like [Sesamum indicum]	0.83	0.46	1	1.16	0.84	1.22	0.26	0.32	0.19	0.12	0.38	0.49	0.92	0.29
TRINITY_DN47332_c3_g2	K01892	EC:6.1.1.21	2.0743	up	WRKY72	PREDICTED: probable WRKY transcription factor 72 [Populus euphratica]	13.72	7.64	18.43	7.9	10.33	16.9	3.1	3.47	5.21	1.93	2.91	2.85	12.49	3.25
TRINITY_DN47332_c3_g5	K01892	EC:6.1.1.21	5.25617	up	WRKY72	probable WRKY transcription factor 72 [Populus trichocarpa]	87.44	26.32	550.32	82.39	105.95	70.12	1.62	1.42	9.2	10.61	4.24	7.12	153.76	5.7
TRINITY_DN47350_c2_g5	K10577	-	1.4318	up	SCE1	PREDICTED: SUMO-conjugating enzyme SCE1 [Ipomoea nil]	0.64	0.94	0.75	0.99	0.83	1.07	0.21	0.4	0.13	0.13	0.55	1.96	0.87	0.56
TRINITY_DN47355_c0_g1	K13448	-	3.80018	up	CML48	probable calcium-binding protein CML48 isoform X1 [Hevea brasiliensis]	122.83	176	124.67	216.07	125.21	160.72	9.04	7.66	10.22	15.58	14.42	14.99	154.25	11.98
TRINITY_DN47358_c0_g1	K08490	-	-1.26266	down	SYP31	PREDICTED: syntaxin-31 [Populus euphratica]	2.17	4.59	1.16	4.14	2.87	3.12	8.21	10.78	9.09	9.82	8.81	8.63	3.01	9.22
TRINITY_DN47363_c1_g1	K01433	EC:3.5.1.10	-3.05559	down	PURU1	PREDICTED: formyltetrahydrofolate deformylase 1, mitochondrial isoform X1 [Vitis vinifera]	0.66	1.33	1.18	1.14	1.74	1.42	16.26	13.58	14.08	13.94	9.27	12.82	1.25	13.32
TRINITY_DN47367_c0_g1	K08495	-	-1.83825	down	GOS12	hypothetical protein GOBAR_DD18036 [Gossypium barbadense]	4.38	7.27	3.91	4.54	5.41	5.29	24.25	21.34	22.11	28.09	20.03	20.57	5.13	22.73
TRINITY_DN47373_c0_g1	K07897	-	-1.18259	down	-	hypothetical protein GOBAR_AA25879 [Gossypium barbadense]	2.05	3.14	2.61	4.54	1.07	1.66	8.79	7.61	5.91	6.9	6.94	6.16	2.51	7.05
TRINITY_DN47375_c1_g2	K01942	EC:6.3.4.9 6.3.4.10 6.3.4.11 6.3.4.15	-1.3141	down	HCS1	hypothetical protein POPTR_002G087700 [Populus trichocarpa]	4.74	7.06	3.91	3.73	5.99	4.35	16.21	14.47	15.64	15.12	15.33	14.99	4.96	15.29
TRINITY_DN47386_c2_g5	K10666	EC:2.3.2.27	1.58344	up	RMA1H1	E3 ubiquitin-protein ligase RMA3-like [Hevea brasiliensis]	3.02	5.35	3.73	4.24	3.04	3.11	2	1.81	1.88	1.37	1.67	0.79	3.75	1.59
TRINITY_DN47386_c2_g9	K10666	EC:2.3.2.27	1.34935	up	RMA1H1	E3 ubiquitin-protein ligase RMA3-like [Hevea brasiliensis]	17.46	29.48	21.28	24.79	22.29	18.61	8.89	13.84	11.72	16.26	8.28	8.77	22.32	11.29
TRINITY_DN47387_c0_g1	K02183	-	1.84973	up	CAM-1	putative EF-hand domain pair protein [Medicago truncatula]	68.9	98.18	57.76	93.7	72.27	90.36	22.19	19.75	29.77	34.42	36.23	36.27	80.2	29.77
TRINITY_DN47387_c0_g2	K06100	-	1.4241	up	-	uncharacterized protein LOC8288069 [Ricinus communis]	36.38	29.86	33.31	33.51	21.6	27.47	23.19	23.38	26.1	28.76	27.19	24.3	30.36	25.49
TRINITY_DN47387_c0_g4	K02183	-	8.38121	up	Calml3	RecName: Full=Calmodulin; Short=CaM	0	0	3.06	3.16	2.55	3.14	0	0	0	0	0	0	1.99	0
TRINITY_DN47399_c0_g2	K06617	EC:2.4.1.82	1.99176	up	RFS6	probable galactinol--sucrose galactosyltransferase 6 [Sesamum indicum]	0.11	0.36	0.5	0.52	0.39	0.5	0.27	0.11	0.01	0.03	0.18	0.14	0.4	0.12
TRINITY_DN47403_c0_g5	K15397	EC:2.3.1.199	4.94119	up	KCS1	3-ketoacyl-CoA synthase 1-like [Hevea brasiliensis]	17.53	16.9	30.75	27.92	21.4	28.72	0.8	1.1	1.59	0.2	0.67	1.75	23.87	1.02
TRINITY_DN47403_c0_g8	K15397	EC:2.3.1.199	2.98565	up	KCS1	3-ketoacyl-CoA synthase 1-like [Manihot esculenta]	11.32	6.99	14.48	10.46	7.17	4.32	1.1	1.3	2.83	0.62	1.52	1.9	9.12	1.55
TRINITY_DN47405_c1_g1	K04564	EC:1.15.1.1	-1.20771	down	SODB	Fe-superoxide dismutase [Bruguiera gymnorhiza]	18.66	29.88	8.88	26.93	12.41	9.06	66.66	62.32	50.57	47.73	36	31.26	17.64	49.09
TRINITY_DN47405_c1_g3	K04564	EC:1.15.1.1	-1.54863	down	FSD2	hypothetical protein JCGZ_26331 [Jatropha curcas]	33.55	22.13	35.79	31.11	56.99	30.7	104.32	134.65	128.21	108.37	221.06	106.18	35.04	133.8
TRINITY_DN47408_c1_g1	K05278	EC:1.14.20.6	-4.07854	down	DLO2	protein DMR6-LIKE OXYGENASE 2 [Jatropha curcas]	151.3	186.44	205.68	178.22	189.13	177.44	4427.04	4775.86	3396.87	4750.51	2671.98	3603.15	181.37	3937.57
TRINITY_DN47416_c4_g1	K14486	-	-3.02668	down	ARF6	hypothetical protein Ahy_B03g061859 isoform B [Arachis hypogaea]	1.19	1.42	2.68	1.42	2.96	1.19	15.01	17.6	17.87	35.61	17.37	22.33	1.81	20.96
TRINITY_DN47421_c0_g4	K02723	-	-4.94225	down	PSBY	photosystem II core complex proteins psbY, chloroplastic [Populus trichocarpa]	45.19	38.73	18.63	30.81	83.84	42.64	2837.62	1753.62	1615.62	1505.34	1154.83	1279.89	43.31	1691.15
TRINITY_DN47422_c0_g1	K00943	EC:2.7.4.9	-1.15002	down	ZEU1	thymidylate kinase isoform X1 [Populus trichocarpa]	6.66	6.53	10.96	7.32	7.4	6.19	21.88	22.3	24.2	21.25	18.32	19.84	7.51	21.3
TRINITY_DN47422_c0_g2	K00943	EC:2.7.4.9	2.53101	up	ZEU1	thymidylate kinase isoform X1 [Populus trichocarpa]	1.92	4.45	2.05	3.08	2	2.5	0.47	0.26	1.26	0.21	0.43	0.33	2.67	0.49
TRINITY_DN47431_c0_g1	K04646	-	-1.21457	down	CHC2	clathrin heavy chain 1 [Ricinus communis]	2.28	1.83	0.5	0.92	0.86	1.43	4.9	3.93	3.51	3.98	4.4	2.69	1.3	3.9
TRINITY_DN47434_c1_g1	K01092	EC:3.1.3.25	-3.33239	down	CURT1B	protein CURVATURE THYLAKOID 1B, chloroplastic [Ziziphus jujuba]	44.88	49.78	57.84	60.64	147.46	90.68	1443.68	1159.88	962.62	944.67	469.13	839.17	75.21	969.86
TRINITY_DN47447_c0_g2	K08913	-	9.74178	up	CAB36	PREDICTED: chlorophyll a-b binding protein 36, chloroplastic [Nicotiana attenuata]	0	0	25.71	0	14.98	0	0	0	0	0	0	0	6.78	0
TRINITY_DN47451_c0_g6	K10755	-	-2.76324	down	-	PREDICTED: uncharacterized protein LOC100268024 [Vitis vinifera]	1.37	3.07	2.68	2.45	2.71	2.81	22.49	21.89	16.55	22.62	22.53	27.27	2.52	22.22
TRINITY_DN47453_c1_g4	K14494	-	-2.80779	down	PAT1	scarecrow-like transcription factor PAT1 [Hevea brasiliensis]	0.94	1.52	1.25	0.77	1.38	0.88	8.56	12.04	8.49	13.57	7.18	10.8	1.12	10.11
TRINITY_DN47460_c0_g2	K11599	-	-2.23124	down	CYCB1-2	PREDICTED: cyclin-B1-2 [Cucumis sativus]	0.2	0.18	0.76	0.06	0.51	0.16	2.37	1.61	1.82	1.87	1.43	2.28	0.31	1.9
TRINITY_DN47466_c0_g1	K01213	EC:3.2.1.67	1.37461	up	At1g80170	PREDICTED: probable polygalacturonase At1g80170 isoform X1 [Populus euphratica]	0.87	0.55	2.31	1.43	1.72	0.69	0.41	0.24	0.74	1.06	0.93	1.02	1.26	0.73
TRINITY_DN47467_c0_g1	K00737	EC:2.4.1.144	1.17226	up	-	beta-1,4-mannosyl-glycoprotein 4-beta-N-acetylglucosaminyltransferase [Jatropha curcas]	6.93	8.88	7.44	9.36	11.68	8.2	4.05	4.63	5.14	5.82	5.24	5.11	8.75	5
TRINITY_DN47468_c3_g8	K01187	EC:3.2.1.20	6.96612	up	-	berberine bridge enzyme-like 15 [Populus trichocarpa]	13.64	0.24	30.41	2.3	2.87	8.18	0.08	0.05	0	0.12	0.03	0.34	9.61	0.1
TRINITY_DN47473_c2_g5	K12471	-	4.2629	up	-	ENTH domain-containing protein C794.11c [Hevea brasiliensis]	56.9	38.38	48.92	32.35	36.86	30.66	0.91	1.24	4.79	0.88	2.15	5.43	40.68	2.57
TRINITY_DN47474_c0_g1	K01087	EC:3.1.3.12	-1.51631	down	TPPD	probable trehalose-phosphate phosphatase D [Ricinus communis]	0.17	0.15	1.16	0.12	0.43	0.31	2.95	1.13	1.14	2.24	0.44	1.33	0.39	1.54
TRINITY_DN47475_c1_g1	K01051	EC:3.1.1.11	3.35309	up	PME15	probable pectinesterase 15 isoform X1 [Populus trichocarpa]	5.12	4.64	2.67	3.86	1.87	2.02	0.08	0.31	0.29	0.15	0.98	0.22	3.36	0.34
TRINITY_DN47475_c1_g2	K09837	EC:1.14.99.45	-2.02821	down	CYP97C1	carotene epsilon-monooxygenase, chloroplastic isoform X1 [Jatropha curcas]	3.2	4.51	4.1	4.73	8.7	7.89	30.08	31.31	25.7	31.5	25.07	30.57	5.52	29.04
TRINITY_DN47477_c0_g1	K07407	EC:3.2.1.22	1.52091	up	AGAL1	alpha-galactosidase 1-like [Prunus yedoensis var. nudiflora]	0.14	0.04	1.28	0.85	4.97	0.74	0.18	0.35	1.66	0.67	0.45	0.82	1.34	0.69
TRINITY_DN47481_c0_g1	K01431	EC:3.5.1.6	-1.34318	down	PYD3	PREDICTED: beta-ureidopropionase [Populus euphratica]	13.87	12.04	9.17	8.33	9.99	11.23	35.26	32.87	40.12	29.95	36.03	35.86	10.77	35.01
TRINITY_DN47485_c1_g1	K01792	EC:5.1.3.15	1.60219	up	-	hypothetical protein VITISV_022854 [Vitis vinifera]	3.73	5.77	3.16	4.53	6.33	4.48	1.82	1.84	1.54	2.01	1.44	1.62	4.67	1.71
TRINITY_DN47499_c0_g1	K12173	-	2.75291	up	TL1	thaumatin-like protein 1b [Hevea brasiliensis]	398.43	358.94	586.05	898.52	575.86	437.18	19.95	18.3	73.39	12.55	475.32	24.53	542.5	104.01
TRINITY_DN47506_c1_g1	K00679	EC:2.3.1.158	2.37937	up	EXL3	hypothetical protein JCGZ_25375 [Jatropha curcas]	2.39	2.41	10.46	3.31	3.07	3.98	1.28	0.95	1.26	1.23	0.85	1.18	4.27	1.12
TRINITY_DN47511_c0_g2	K03283	-	4.84304	up	HSP70	heat shock protein 70 [Kandelia obovata]	393.28	405.25	235.53	361.43	458.44	344.35	9.75	27.61	17.67	19.32	11.5	12.89	366.38	16.46
TRINITY_DN47511_c0_g5	K03283	-	2.64993	up	MED37C	heat shock cognate 70 kDa protein 2-like isoform X1 [Abrus precatorius]	560.09	532.98	621.91	820.06	696.64	459.35	13.56	45.31	176.35	158.5	214.18	178.86	615.17	131.13
TRINITY_DN47511_c0_g8	K03283	-	2.50749	up	Hspa8	heat shock cognate 70 kDa protein [Jatropha curcas]	0.23	1.03	4.08	4.28	4.13	5.32	0.3	0.32	0.81	0.61	1.01	1.42	3.18	0.74
TRINITY_DN47514_c0_g2	K00780	EC:2.4.99.4	-3.00782	down	GALT29A	beta-1,6-galactosyltransferase GALT29A-like isoform X2 [Manihot esculenta]	1.01	0.88	0.34	0.21	0.44	0.39	1.73	2.46	5.29	8.5	6.44	9.72	0.55	5.69
TRINITY_DN47523_c0_g1	K01772	EC:4.99.1.1 4.99.1.9	-2.34661	down	BHLH2	transcription factor EGL1-like [Hevea brasiliensis]	0.84	0.88	1.29	1.91	3.15	1.72	9.38	12.89	7.96	13.5	10.89	9.36	1.63	10.66
TRINITY_DN47523_c0_g2	K13422	-	-2.9999	down	GL3	transcription factor MYC1-like [Quercus suber]	1.18	1.32	1.29	0.62	1.12	0.91	7.16	9.24	9.06	13.86	13.57	14.56	1.07	11.24
TRINITY_DN47529_c0_g1	K12657	EC:2.7.2.11 1.2.1.41	2.1914	up	-	delta-1-pyrroline-5-carboxylate synthase [Populus trichocarpa]	29.5	29.84	37.98	36.25	34.01	31.81	9.73	9.11	11.87	11.71	11.4	10.53	33.23	10.72
TRINITY_DN47537_c2_g1	K06892	EC:1.14.11.-	1.42518	up	IQM3	IQ domain-containing protein IQM3-like [Hevea brasiliensis]	18.31	11.04	19.02	12.76	11.42	11.26	4.61	6.05	6.68	8.1	4.99	10.86	13.97	6.88
TRINITY_DN47540_c0_g4	K07541	-	1.2094	up	-	phosphatidylinositol-glycan biosynthesis class X protein isoform X1 [Jatropha curcas]	10.7	10.29	5.63	6.57	6.48	9.53	4.59	5.36	4.46	4.35	8.72	5.96	8.2	5.57
TRINITY_DN47546_c1_g2	K14502	EC:2.7.11.1	-1.07903	down	ASK7	shaggy-like kinase, partial [Ricinus communis]	17.97	14.85	12.73	8	17.49	18.27	38.27	40.77	29.98	44.18	35.59	44.42	14.88	38.87
TRINITY_DN47546_c1_g7	K01051	EC:3.1.1.11	2.2229	up	PME1	Pectinesterase inhibitor, putative [Ricinus communis]	17.65	17.76	17.7	15.41	11.66	13.01	3.33	3.67	4.46	4.54	4.64	5.16	15.53	4.3
TRINITY_DN47550_c0_g1	K04565	EC:1.15.1.1	-1.70074	down	SODCP	superoxide dismutase [Cu-Zn], chloroplastic [Sesamum indicum]	0.86	0.26	0.53	0.44	0.58	0.35	3.96	4.01	1.5	1.72	0.95	1.08	0.5	2.2
TRINITY_DN47552_c0_g4	K00963	EC:2.7.7.9	1.37331	up	-	BnaA05g32480D [Brassica napus]	0.29	0.63	0.76	0.62	0.69	0.84	0.2	0.19	0.03	0.16	0.61	0.64	0.64	0.3
TRINITY_DN47555_c0_g3	K01183	EC:3.2.1.14	7.32036	up	CHIA	class V chitinase [Populus trichocarpa]	3.34	5.5	21.74	17.26	5.9	25.62	0.04	0.17	0.3	0.04	0	0.08	13.23	0.1
TRINITY_DN47556_c0_g1	K13427	EC:1.14.13.39	-1.62438	down	BPG2	GTP-binding protein BRASSINAZOLE INSENSITIVE PALE GREEN 2, chloroplastic [Populus trichocarpa]	4.76	6.14	4	4.56	9.94	7.49	29.36	29.62	23.01	23.27	17.97	23.44	6.15	24.45
TRINITY_DN47558_c4_g11	K07342	-	1.16294	up	Os02g0178400	PREDICTED: protein transport protein Sec61 subunit gamma-like [Nelumbo nucifera]	17.01	26.71	15.19	21.78	15.86	15.13	8.1	9.37	12.32	11.13	12.3	10.17	18.61	10.56
TRINITY_DN47558_c4_g8	K00031	EC:1.1.1.42	-1.597	down	-	isocitrate dehydrogenase [NADP], chloroplastic/mitochondrial isoform X1 [Ricinus communis]	1.94	4.63	1.77	0.99	2.6	1.67	10.44	10.87	12.17	10.12	9.66	10.47	2.27	10.62
TRINITY_DN47560_c0_g1	K02717	-	-3.79193	down	PNSL1	PREDICTED: photosynthetic NDH subunit of lumenal location 1, chloroplastic isoform X1 [Nelumbo nucifera]	2.01	2.29	1.44	1.19	4.86	3.55	57.8	46.34	49.57	45.08	24.23	43.51	2.56	44.42
TRINITY_DN47564_c1_g3	K13412	EC:2.7.11.1	3.15481	up	CPK30	calcium-dependent protein kinase 10-like [Vigna unguiculata]	120.59	58.12	125.86	67.21	63.17	59.26	5.11	8.17	24.62	7.54	16.87	23.97	82.37	14.38
TRINITY_DN47564_c1_g4	K13412	EC:2.7.11.1	-3.27557	down	CPK13	calcium-dependent protein kinase 13 [Ricinus communis]	0.56	0.47	0.87	0.59	1.64	0.53	7.77	10.24	11.89	13.77	6.42	11.35	0.78	10.24
TRINITY_DN47566_c0_g1	K06215	EC:4.3.3.6	2.6195	up	PDX1	Vitamin B6 biosynthesis protein [Corchorus olitorius]	352.02	593.93	167.91	404.77	460.76	544.65	106.97	109.6	91.04	96.96	65.07	98.67	420.67	94.72
TRINITY_DN47566_c0_g3	K13667	EC:2.4.1.-	2.20754	up	-	protein O-glucosyltransferase 1 [Hevea brasiliensis]	18.88	30.69	16.26	17.15	23.96	27.97	3.45	6.11	5.42	8.31	10.19	4.55	22.48	6.34
TRINITY_DN47566_c0_g4	K06215	EC:4.3.3.6	1.07583	up	PDX1	probable pyridoxal 5'-phosphate synthase subunit PDX1 [Jatropha curcas]	19.57	36.54	22.97	38.14	40.33	25.59	11.81	15.75	19.16	17.86	19.9	23.65	30.52	18.02
TRINITY_DN47568_c1_g2	K12930	EC:2.4.1.115	1.71642	up	UFGT	PREDICTED: anthocyanidin 3-O-glucosyltransferase 7-like [Populus euphratica]	3.75	4.26	0.43	2.33	2.1	3.57	0.48	0.73	2.01	0.42	0.99	1.69	2.74	1.05
TRINITY_DN47568_c1_g3	K12930	EC:2.4.1.115	-3.02449	down	UFGT	PREDICTED: anthocyanidin 3-O-glucosyltransferase 7-like [Populus euphratica]	0.24	0.66	0.21	0.36	0.35	0.16	2.92	4	3.23	4.1	2.44	3.81	0.33	3.42
TRINITY_DN47575_c0_g4	K03428	EC:2.1.1.11	-3.84199	down	CHLM	magnesium protoporphyrin IX methyltransferase, chloroplastic [Manihot esculenta]	5.21	6.18	5.89	3.83	8.33	6.01	126.72	118.27	88.57	138.84	65.29	117.08	5.91	109.13
TRINITY_DN47576_c0_g3	K03283	-	5.12576	up	MED37E	hypothetical protein DVH24_023107 [Malus domestica]	39.68	37.19	30.57	62.34	63.81	43.62	0.99	2.31	0.85	2.55	2.53	1.17	46.2	1.73
TRINITY_DN47579_c0_g5	K13525	-	1.09388	up	CDC48	cell division cycle protein 48 homolog [Coffea eugenioides]	30.15	47.86	26.96	42.25	45.83	40.83	22.28	27.43	23.09	25.9	20.9	20.79	38.98	23.4
TRINITY_DN47583_c2_g3	K16055	EC:2.4.1.15 3.1.3.12	-3.38324	down	TPS6	alpha,alpha-trehalose-phosphate synthase [UDP-forming] 6 [Jatropha curcas]	1.41	1.85	1.44	1.85	3.89	1.99	34.41	29.67	23.39	31.8	19.17	29.79	2.07	28.04
TRINITY_DN47583_c2_g5	K15889	EC:3.1.1.-	-2.27676	down	ICMEL1	hypothetical protein JCGZ_18257 [Jatropha curcas]	1.78	2.97	2.4	3.88	4.13	2.36	19.08	19.61	15.66	21.57	17.89	17.25	2.92	18.51
TRINITY_DN47585_c0_g1	K03841	EC:3.1.3.11	-2.07641	down	FBP	fructose-1,6-bisphosphatase, chloroplastic [Ricinus communis]	53.18	62.54	35.39	62.36	134.1	88.37	459.31	424.76	407.96	350.29	332.37	370.23	72.66	390.82
TRINITY_DN47587_c2_g1	K19355	EC:3.2.1.78	1.74988	up	MAN2	mannan endo-1,4-beta-mannosidase 2 isoform X1 [Manihot esculenta]	33.28	77.77	21.12	43.39	34.56	40.84	8.85	12.96	12.68	18.52	15.72	17.63	41.83	14.39
TRINITY_DN47590_c1_g5	K12603	EC:3.1.13.4	1.41375	up	CCR4-1	carbon catabolite repressor protein 4 homolog 1-like [Manihot esculenta]	9.08	13.82	12.57	15.43	15.4	13.68	7.22	11.69	12.51	8.16	5.33	14.88	13.33	9.96
TRINITY_DN47598_c0_g1	K00145	EC:1.2.1.38	-1.19529	down	At2g31100	phospholipase A1-IIgamma-like [Momordica charantia]	1.21	2.32	4.2	2.56	1.55	1.64	10.19	7.78	6.03	5.82	3.5	4.65	2.25	6.33
TRINITY_DN47600_c2_g2	K18447	EC:3.6.1.21	-2.77957	down	NUDT25	hypothetical protein CICLE_v10016942mg [Citrus clementina]	3.28	7.74	2.91	6.42	3.4	2.52	31.26	35.94	22.29	31.52	39.99	36.1	4.38	32.85
TRINITY_DN47601_c0_g1	K08232	EC:1.6.5.4	1.69862	up	AFRR	monodehydroascorbate reductase [Sesamum indicum]	0.34	0.4	0.24	0.63	0.6	0.37	0.21	0.09	0.1	0.11	0.12	0.1	0.43	0.12
TRINITY_DN47603_c0_g1	K03257	-	-1.69116	down	-	eukaryotic initiation factor 4A-9 [Nicotiana tabacum]	9.99	11.64	10.83	8.87	13.19	9.67	59.26	43.91	50.14	52.21	36.33	37.58	10.7	46.57
TRINITY_DN47603_c2_g2	K03257	-	2.87809	up	TIF4A-1	eukaryotic initiation factor 4A-14-like [Coffea arabica]	0.11	0.06	0.24	0.58	0.15	0.46	0.03	0.08	0.08	0	0.03	0.05	0.27	0.05
TRINITY_DN47610_c1_g2	K04374	-	2.18993	up	BZIP34	basic leucine zipper 61-like [Quercus suber]	0.43	0.27	2.66	0.29	1.37	0.55	0.03	0.03	0.42	0.99	0.13	0.57	0.93	0.36
TRINITY_DN47613_c2_g1	K05681	-	1.5183	up	ABCG25	ABC transporter G family member 25-like [Hevea brasiliensis]	0.98	2.07	1.5	1.37	1.95	1.51	0.4	0.47	0.72	0.64	1.2	0.72	1.56	0.69
TRINITY_DN47616_c0_g4	K11778	EC:2.5.1.87	-1.45393	down	MED32	mediator of RNA polymerase II transcription subunit 32 [Jatropha curcas]	7.44	7.19	4.31	4.4	4.33	5.28	23.37	25.77	15.37	25.83	16.78	23.38	5.49	21.75
TRINITY_DN47631_c1_g1	K01087	EC:3.1.3.12	-1.49182	down	KLCR1	protein KINESIN LIGHT CHAIN-RELATED 1-like isoform X1 [Manihot esculenta]	2.86	3.44	2.19	1.36	3.28	2.95	6.81	7.77	7.35	16.05	9.96	11.39	2.68	9.89
TRINITY_DN47632_c0_g1	K14016	-	4.84734	up	Ufd1l	ubiquitin fusion degradation protein 1 homolog [Hevea brasiliensis]	9.56	7.1	10.47	7.31	8.15	8.73	0.24	1.06	0.27	0.65	0.92	0.17	8.55	0.55
TRINITY_DN47632_c0_g2	K14016	-	4.57807	up	UFD1L	ubiquitin recognition factor in ER-associated degradation protein 1 isoform X1 [Rosa chinensis]	11.36	7.35	9.15	6.81	5.13	6.35	0.61	0.15	0.27	0.31	0.56	0.41	7.69	0.39
TRINITY_DN47639_c1_g5	K01114	EC:3.1.4.3	2.72446	up	NPC1	PREDICTED: non-specific phospholipase C1-like [Populus euphratica]	266.67	357.85	145.67	372.99	162.78	213.81	34.58	39.2	45.3	42.63	87.85	44.98	253.29	49.09
TRINITY_DN47651_c3_g3	K20547	EC:3.2.1.14	2.50769	up	CTL1	chitinase-like protein 1 [Sesamum indicum]	0.68	0.39	0.81	0.95	0.94	1.16	0	0.35	0.08	0.11	0.2	0.39	0.82	0.19
TRINITY_DN47661_c1_g3	K05298	EC:1.2.1.13	-1.38385	down	GAPA	glyceraldehyde-3-phosphate dehydrogenase [Mangifera indica]	219.11	313.01	253.22	275.19	699.73	503.45	1431.38	1367.59	1349.11	1248.44	966	1324.3	377.29	1281.14
TRINITY_DN47663_c0_g2	K01673	EC:4.2.1.1	8.20797	up	-	PREDICTED: carbonic anhydrase, chloroplastic isoform X1 [Nicotiana attenuata]	0	0	7.28	0	4.54	0	0	0	0	0	0	0	1.97	0
TRINITY_DN47663_c0_g5	K01673	EC:4.2.1.1	-1.03169	down	BCA3	PREDICTED: carbonic anhydrase 2 isoform X1 [Fragaria vesca subsp. vesca]	4.36	5.3	17.92	5.48	3.91	4.95	19.01	21.23	26.99	15.37	16.32	17.06	6.99	19.33
TRINITY_DN47678_c0_g2	K04382	EC:3.1.3.16	1.95486	up	PP2A4	hypothetical protein CDL15_Pgr025453 [Punica granatum]	14.83	21.99	16.84	18.4	16.44	17.93	5.52	6.19	5.66	6.39	5.38	6	17.74	5.86
TRINITY_DN47678_c0_g3	K04382	EC:3.1.3.16	1.95716	up	PP2A2	PREDICTED: serine/threonine-protein phosphatase PP2A-4 catalytic subunit-like, partial [Malus domestica]	2.79	3.54	2.8	1.98	2.08	2.13	0.38	1.17	0.57	1.06	0.68	1.22	2.55	0.85
TRINITY_DN47681_c0_g1	K02160	-	1.0163	up	BCCP2	biotin carboxyl carrier protein of acetyl-CoA carboxylase, chloroplastic-like [Manihot esculenta]	11.18	16.55	7.07	11.98	12.17	10.57	4.01	5.19	5.94	10.83	9.24	8.86	11.59	7.34
TRINITY_DN47688_c0_g1	K01528	EC:3.6.5.5	1.6465	up	DRP1E	PREDICTED: dynamin-related protein 1E [Cucumis melo]	43.43	55.8	52.02	43.05	39.08	40.6	17.17	19.53	16.61	20.28	21.82	18.38	45.66	18.96
TRINITY_DN47688_c0_g2	K01528	EC:3.6.5.5	-2.13837	down	DRP1E	DYNAMIN-like 1E isoform 1 [Theobroma cacao]	0.76	3.47	1.26	1.52	0.29	0.25	10.11	11.16	5.19	4.85	2.41	2.44	1.26	6.03
TRINITY_DN47689_c0_g1	K01835	EC:5.4.2.2	-1.07205	down	PGMP	phosphoglucomutase, chloroplastic-like [Manihot esculenta]	45.61	59.72	45.6	53.71	50.63	39.38	181.38	139.64	126.14	100.39	97.38	105.59	49.11	125.09
TRINITY_DN47692_c0_g2	K02960	-	-2.73283	down	RCA1	chloroplast ribulose-1,5-bisphosphate carboxylase/oxygenase activase small subunit [Kandelia candel]	1102.51	2152.58	1183.69	2174.32	3500.91	1975.1	21113.7	19107.7	15481.4	14703.4	16900.3	14769.4	2014.85	17012.6
TRINITY_DN47695_c0_g1	K13348	-	-1.4705	down	-	uncharacterized protein LOC110667911 isoform X2 [Hevea brasiliensis]	280.86	241.31	575.87	354.54	319.74	285.5	1863.09	1604.27	1176.88	1063.03	701.38	1018.32	342.97	1237.83
TRINITY_DN47700_c0_g1	K11816	EC:1.14.13.168	-2.33276	down	YUC2	indole-3-pyruvate monooxygenase YUCCA2-like [Manihot esculenta]	0.14	0.64	0.19	0.36	0.36	0.22	2.68	4.17	1.73	1.43	1.31	2.52	0.32	2.31
TRINITY_DN47709_c0_g2	K12876	-	1.08589	up	rbm8a	RNA-binding protein Y14 isoform X2 [Carica papaya]	86.08	108.92	63.23	85.71	69.45	73.3	52.28	52.73	43.94	49.75	51.4	49.9	81.11	50
TRINITY_DN47717_c0_g1	K03538	EC:3.1.26.5	-2.0394	down	-	ribonuclease P protein subunit p29 isoform X1 [Ricinus communis]	2.63	4.47	0.98	2.7	2.27	2.69	20.79	19.73	14.49	15.38	11.86	12.18	2.62	15.74
TRINITY_DN47726_c2_g1	K00430	EC:1.11.1.7	-1.83463	down	PER31	peroxidase 31-like [Hevea brasiliensis]	3	2.76	4.04	1.57	7.61	3.43	3.99	4.81	23.36	23.54	30.23	26.61	3.73	18.76
TRINITY_DN47728_c2_g1	K11583	-	1.19402	up	B''BETA	serine/threonine protein phosphatase 2A regulatory subunit B''alpha isoform X2 [Populus trichocarpa]	4.68	8.87	2.17	5.86	7.27	4.34	5.08	3.52	6.03	3.01	2.14	2.66	5.53	3.74
TRINITY_DN47735_c0_g3	K01051	EC:3.1.1.11	2.28237	up	-	pectinesterase [Jatropha curcas]	2.87	0.51	2.92	0.42	2.49	5.58	0.04	0.09	1.58	0.47	0.32	1.6	2.47	0.68
TRINITY_DN47738_c0_g8	K16221	-	-3.47368	down	TCP7	TCP family transcription factor [Theobroma cacao]	4.28	4.37	2.07	2.3	3.27	3.3	25.16	25.11	39.8	58.45	62.58	66.93	3.27	46.34
TRINITY_DN47742_c1_g1	K02931	-	-3.01355	down	RPL5	50S ribosomal protein L5, chloroplastic-like [Coffea arabica]	0.41	0.63	0.82	0.36	0.67	0.75	9.68	7.01	6.71	6.22	4.84	3.85	0.61	6.38
TRINITY_DN47745_c0_g4	K02941	-	1.46185	up	-	60S acidic ribosomal protein P [Trema orientale]	0.3	0.29	0.5	0.61	0.44	0.44	0.1	0.16	0.16	0.15	0.27	0.37	0.43	0.2
TRINITY_DN47748_c0_g1	K00074	EC:1.1.1.157	-1.21053	down	hbdA	uncharacterized protein LOC18095567 [Populus trichocarpa]	11.62	13.65	9.6	8.18	11.51	12.73	32.56	29.81	35.15	34.16	37.22	28.23	11.21	32.85
[truncated: 2,433 more rows]

## Sheet: A.marina
Gene_ID	KOEntry	EC	log2FC	regulation	Name	Annotation	Am_CS_1_TPM	Am_CS_2_TPM	Am_CS_3_TPM	Am_CS_4_TPM	Am_CS_5_TPM	Am_CS_6_TPM	Am_CK_1_TPM	Am_CK_2_TPM	Am_CK_3_TPM	Am_CK_4_TPM	Am_CK_5_TPM	Am_CK_6_TPM	Am_CS_mean_TPM	Am_CK_mean_TPM
TRINITY_DN1618_c0_g1	K02698	-	-7.58145	down	PSAK	photosystem I reaction center 6 [Zea mays]	0	0	0	0	0	0	6.3	5.89	5.81	5.74	0	0	0	3.96
TRINITY_DN1656_c0_g1	K02695	-	-7.60146	down	PSAH	photosystem I reaction center subunit VI, chloroplastic precursor [Zea mays]	0	0	0	0	0	0	7.35	6.02	5.42	4.7	0	0	0	3.91
TRINITY_DN23404_c0_g1	K02693	-	-2.45244	down	PSAE-1	photosystem I reaction center subunit IV B, chloroplastic [Sesamum indicum]	174.15	83.68	51.11	116.56	183.88	81.09	884.01	927.86	1286.73	1115.36	1153.39	1134.84	115.08	1083.7
TRINITY_DN2788_c0_g1	K14332	-	-7.38058	down	PSAO	uncharacterized protein LOC100283848 [Zea mays]	0	0	0	0	0	0	5	6.09	6.15	4.01	0	0	0	3.54
TRINITY_DN30633_c0_g2	K02721	-	-6.50613	down	PSBW	unknown [Zea mays]	0	0	0	0	0	0	3.53	3.21	3.02	3.06	0	0	0	2.14
TRINITY_DN32901_c0_g1	K02639	-	-7.71448	down	SEND33	PREDICTED: ferredoxin [Nicotiana sylvestris]	0	0	0	0	0	0	0	0	24.28	18.15	0	0	0	7.07
TRINITY_DN34132_c0_g1	K02113	-	-1.89791	down	ATPD	uncharacterized protein LOC105173971 [Sesamum indicum]	6.5	4.45	2.87	5.6	7.25	5.55	29.22	25.75	49.16	38.53	36.16	29.52	5.37	34.72
TRINITY_DN34146_c0_g1	K14332	-	-6.59814	down	PSAO	PREDICTED: photosystem I subunit O-like isoform X1 [Nicotiana sylvestris]	0	0	0	0	0	0	0	0	14.75	9.73	0	0	0	4.08
TRINITY_DN34163_c0_g1	K02692	-	-6.77756	down	psaD	photosystem I reaction center subunit II [Zea mays]	0	0	0	0	0	0.09	7.08	7.09	9.37	6.79	0	0	0.01	5.05
TRINITY_DN34329_c0_g2	K02692	-	-2.2311	down	psaD	photosystem I reaction center subunit II, chloroplastic-like [Sesamum indicum]	86.8	42.53	34.4	80.17	125.31	52.45	464.93	493.25	804.08	587.22	576.66	436.04	70.28	560.36
TRINITY_DN34329_c0_g4	K02692	-	-2.26299	down	psaD	photosystem I reaction center subunit II, chloroplastic-like [Sesamum indicum]	176.46	81.3	62.39	178.23	180.51	97.98	908.02	875.8	1290.53	1018.53	1329.03	889.86	129.48	1051.96
TRINITY_DN35011_c0_g1	K02721	-	-6.74261	down	PSBW	PREDICTED: photosystem II reaction center W protein, chloroplastic-like [Nicotiana tabacum]	0	0	0	0	0	0	0	0	14.05	11.31	0	0	0	4.23
TRINITY_DN36189_c0_g1	K02717	-	-6.48801	down	PSBP	Oxygen-evolving enhancer protein 2-1 chloroplastic [Zea mays]	0	0.06	0	0	0.07	0	4.47	7.36	6.8	5.62	0.06	0	0.02	4.05
TRINITY_DN36222_c0_g1	K02723	-	-6.79608	down	PSBY	PREDICTED: photosystem II core complex proteins psbY, chloroplastic [Nicotiana attenuata]	0	0	0	0	0	0	0	0	9.01	4.01	0	0	0	2.17
TRINITY_DN36339_c0_g1	K02638	-	-7.55274	down	PETE	plastocyanin, chloroplastic [Zea mays]	0	0	0	0.14	0	0	12.43	14.84	13.56	12.38	0	0	0.02	8.87
TRINITY_DN36536_c0_g2	K02717	-	-1.95219	down	PNSL1	hypothetical protein CDL12_23132 [Handroanthus impetiginosus]	5.16	2.56	1.27	5.2	4.98	3.07	29.99	25.12	38.26	31.5	29.04	29.5	3.71	30.57
TRINITY_DN36548_c0_g1	K02698	-	-6.42057	down	PSAK	photosystem I reaction center subunit X PSI-K [Nicotiana benthamiana]	0	0	0	0	0	0	0	0	20.85	11.68	0	0	0	5.42
TRINITY_DN36579_c0_g1	K08905	-	-7.07857	down	PSAG	photosystem I reaction center subunit V [Zea mays]	0	0	0	0	0	0	3.77	4.77	3.57	2.66	0	0	0	2.46
TRINITY_DN37637_c0_g1	K08905	-	-5.7571	down	PSAG	PREDICTED: photosystem I reaction center subunit V, chloroplastic-like [Nicotiana sylvestris]	0	0	0	0	0	0	0	0	9.63	6.35	0	0	0	2.66
TRINITY_DN37881_c0_g13	K02109	-	1.43823	up	-	uncharacterized protein LOC114171364 [Vigna unguiculata]	5.05	1.49	2.28	5.36	2.6	6.27	2.28	5.15	1.05	0.45	2.8	2.28	3.84	2.34
TRINITY_DN37936_c0_g5	K08903	-	-3.45597	down	PSB28	hypothetical protein CDL12_18152 [Handroanthus impetiginosus]	5.7	5.32	5.43	6.47	5.64	7.15	81.42	67.88	109.95	85.7	82.24	98.63	5.95	87.64
TRINITY_DN38244_c0_g2	K02638	-	-6.23796	down	PETE	PREDICTED: plastocyanin [Nicotiana sylvestris]	0	0	0	0	0	0	0	0	6.71	4.23	0	0	0	1.82
TRINITY_DN38244_c0_g3	K02638	-	-5.78407	down	PETE	PREDICTED: plastocyanin A'/A'' [Nicotiana sylvestris]	0	0	0	0	0	0	0	0	4.66	3.89	0	0	0	1.43
TRINITY_DN38300_c1_g1	K02636	EC:1.10.9.1	-6.21858	down	petC2	PREDICTED: cytochrome b6-f complex iron-sulfur subunit 1, chloroplastic [Nicotiana tomentosiformis]	0	0	0	0	0	0	0	0	10.21	8.73	0	0	0	3.16
TRINITY_DN38451_c1_g1	K02638	-	-3.12367	down	PETE	hypothetical protein CDL12_26119 [Handroanthus impetiginosus]	31.42	14.17	9.21	34.91	49.86	11.3	330.38	318.13	418.6	324.86	418.95	378.44	25.14	364.89
TRINITY_DN38664_c0_g1	K02693	-	-6.74251	down	PSAEB	photosystem I reaction center subunit IV B, chloroplastic [Nicotiana sylvestris]	0	0	0	0	0	0	0	0	12.18	8.71	0	0	0	3.48
TRINITY_DN38844_c0_g1	K02699	-	-8.7149	down	PSAL	uncharacterized protein LOC100383080 [Zea mays]	0	0	0	0	0	0	6.41	8.03	8.07	6.13	0	0	0	4.77
TRINITY_DN38875_c0_g2	K08901	-	-2.49473	down	PNSL2	photosynthetic NDH subunit of lumenal location 2, chloroplastic [Sesamum indicum]	10.76	5.93	4.62	10.41	17.96	5.97	76.54	68.31	96.53	99.63	124.7	74.04	9.28	89.96
TRINITY_DN39101_c1_g10	K02689	-	1.13548	up	psaA	photosystem I P700 chlorophyll a apoprotein A1 (chloroplast) [Helianthus annuus]	50.31	24.88	40.67	53.44	36.92	47.95	47	61.05	32.65	5.16	33.39	22.31	42.36	33.59
TRINITY_DN39475_c0_g2	K02694	-	-3.24915	down	PSAF	PREDICTED: photosystem I reaction center subunit III, chloroplastic-like [Nicotiana attenuata]	0.93	0	0	0.42	0	2.35	0	0.45	12.5	9.51	0.93	0.86	0.62	4.04
TRINITY_DN39475_c0_g3	K02694	-	-3.59593	down	PSAF	photosystem I reaction center subunit III, chloroplastic [Sesamum indicum]	37.25	26.75	17.66	29.85	42.91	32.13	555.52	432.6	939.91	550.14	700.78	804.08	31.09	663.84
TRINITY_DN39537_c0_g4	K02109	-	-2.37555	down	ATPG	hypothetical protein CDL12_03272 [Handroanthus impetiginosus]	35.82	15.15	9.69	27.61	41.27	21.28	210.26	156.7	263.22	235.99	253.34	199.39	25.14	219.82
TRINITY_DN39537_c0_g7	K02109	-	-7.69569	down	ATPG	uncharacterized protein LOC100282566 [Zea mays]	0	0	0	0	0	0	3.21	3.94	3.8	2.82	0.07	0.07	0	2.32
TRINITY_DN39846_c1_g3	K02111	EC:3.6.3.14	3.12271	up	-	hypothetical protein BVC80_8595g9 [Macleaya cordata]	12667	23820.9	36861.5	9576.33	12689.7	13461.1	4692.19	7729.02	4235.02	1830.98	3427.2	3788.87	18179.4	4283.88
TRINITY_DN39927_c1_g1	K02699	-	-7.64998	down	PSAL	PREDICTED: photosystem I reaction center subunit XI, chloroplastic-like [Nicotiana attenuata]	0	0	0	0	0	0	0	0	13.74	9.18	0	0	0	3.82
TRINITY_DN40011_c2_g1	K02694	-	-4.44397	down	PSAF	Photosystem I [Handroanthus impetiginosus]	40.61	21.96	15.35	27.36	55.92	25.97	1005	980.93	1411.62	1322.8	1242.08	1001	31.19	1160.57
TRINITY_DN40011_c2_g14	K02694	-	-3.7712	down	PSAF	Photosystem I [Handroanthus impetiginosus]	26.09	10.97	12.14	20.3	35.29	14.75	387.7	366.93	679.2	476.49	459.75	456.23	19.92	471.05
TRINITY_DN40253_c0_g2	K02695	-	-1.48649	down	PSAH	PREDICTED: photosystem I reaction center subunit VI, chloroplastic-like [Erythranthe guttata]	5.66	1.85	0.49	8.65	3.39	4.26	13.07	16.15	18.4	17.76	17.01	12.65	4.05	15.84
TRINITY_DN40253_c0_g5	K02695	-	-2.14295	down	PSAH	PREDICTED: photosystem I reaction center subunit VI-2, chloroplastic-like [Solanum tuberosum]	472.8	161.61	165.96	328.01	469.94	228.76	2073.47	1789.1	3009.6	2252.5	2516.51	2575.08	304.51	2369.38
TRINITY_DN40424_c1_g2	K02641	EC:1.18.1.2	2.94553	up	Os07g0147900	ferredoxin--NADP reductase, root isozyme, chloroplastic [Carica papaya]	5.33	4.1	9.13	11	8.88	11.23	14.13	6.96	4.98	10.46	13.84	7.62	8.28	9.67
TRINITY_DN41358_c1_g4	K02699	-	-1.59442	down	PSAL	photosystem I reaction center subunit XI, chloroplastic-like [Olea europaea var. sylvestris]	133.85	79.88	56.45	128.6	304.71	74.13	614.45	514.82	863.88	674.8	624.46	703.13	129.6	665.92
TRINITY_DN41499_c0_g2	K02716	-	-2.33802	down	PSBO	chloroplast PsbO4 precursor [Nicotiana benthamiana]	101.04	67.44	46.19	90.2	293.53	69.74	782.33	783.94	1152.29	1091.93	916.04	966.93	111.36	948.91
TRINITY_DN41499_c0_g3	K02716	-	-6.89856	down	PSBO	PREDICTED: oxygen-evolving enhancer protein 1, chloroplastic [Nicotiana attenuata]	0	0	0	0	0	0	0	0	4.34	3.12	0	0	0	1.24
TRINITY_DN41499_c0_g5	K02716	-	-1.00158	down	PSBO	oxygen-evolving enhancer protein 1, chloroplastic [Sesamum indicum]	130.79	67.54	55.15	98.37	323.52	83.1	343.75	396.49	530.83	506.21	394.82	381.08	126.41	425.53
TRINITY_DN41926_c0_g9	K02634	-	1.10681	up	petA	cytochrome f (chloroplast) [Crescentia cujete]	4.1	2.9	4.02	3.99	2.62	4.16	4.31	3.1	4.72	1.19	3.19	1.83	3.63	3.06
TRINITY_DN42350_c1_g1	K02639	-	-1.34381	down	petF2	ferredoxin family protein [Populus tomentosa]	26.38	6.78	4.41	21.57	20.71	13.85	56.5	52.04	64.31	70.45	76.11	57.73	15.62	62.86
TRINITY_DN42354_c1_g5	K02110	-	1.49016	up	atpH	hypothetical protein Lo_he_he1Pt0180 (plastid) [Lobelia heterophylla subsp. heterophylla]	15.84	11.5	18.29	15.58	12.37	14.08	9.82	11.68	13.35	3.35	11.21	7.96	14.61	9.56
TRINITY_DN42478_c5_g4	K02714	-	1.32983	up	psbM	photosystem II protein M (chloroplast) [Phoenix dactylifera]	5.74	4.67	7.07	4.3	3.66	5.6	3.1	4.22	4.93	2.22	5.02	3.7	5.17	3.87
TRINITY_DN42598_c3_g4	K02639	-	-1.1276	down	-	ferredoxin-I [Dorcoceras hygrometricum]	18.97	8.9	6.07	16.63	18.81	8.9	45.24	35.8	67.47	45.45	43.53	54.15	13.05	48.61
TRINITY_DN42637_c1_g10	K02639	-	4.9599	up	FDX3	ferredoxin, root R-B1-like [Sesamum indicum]	5.27	17.65	10.82	5.77	6.24	12.56	0.27	0.21	0.02	0.25	2.3	0.56	9.72	0.6
TRINITY_DN42788_c0_g13	K02639	-	-2.14514	down	SEND33	hypothetical protein CDL12_00294 [Handroanthus impetiginosus]	266.12	126.84	101.98	252.25	449.24	134.13	1538.58	1291.52	2371.53	1935.26	1401.58	1537.22	221.76	1679.28
TRINITY_DN42788_c0_g6	K02639	-	-8.67158	down	FDX1	adrenodoxin, mitochondrial [Zea mays]	0	0	0	0	0	0	11.74	12.44	11.06	9.15	0	0	0	7.4
TRINITY_DN43002_c0_g5	K02109	-	1.4532	up	At4g18380	F-box protein At4g18380-like [Sesamum indicum]	11.49	7.85	7.02	17.8	8.79	8.43	8.25	7.01	12.99	7.62	8.6	12.82	10.23	9.55
TRINITY_DN43262_c0_g7	K02635	-	1.31017	up	-	PREDICTED: cytochrome b-like [Capsicum annuum]	13.35	8.31	16.08	10.19	7.08	9.98	7.88	12.19	12.57	2.29	9.3	4.71	10.83	8.16
TRINITY_DN43443_c0_g1	K02703	EC:1.10.3.9	1.2475	up	-	ATP synthase subunit 6 (mitochondrion) [Neobartsia pedicularoides]	5.11	3.82	1.81	2.54	1.23	3.47	6.92	2.22	3.92	7.35	4.34	5.11	3	4.98
TRINITY_DN44103_c1_g3	K08901	-	-8.59993	down	PSBQ1	oxygen-evolving enhancer protein 3-1 [Zea mays]	0	0	0	0	0	0	7.31	7.79	6.93	5.7	0	0	0	4.62
TRINITY_DN44401_c0_g1	K02717	-	-1.91144	down	PSBP	hypothetical protein CDL12_06931 [Handroanthus impetiginosus]	453.52	264.57	147.29	315.93	312.21	230.37	1670.09	1694.44	2280.88	2030.23	1981.43	1695.17	287.31	1892.04
TRINITY_DN44401_c0_g2	K02717	-	-2.98226	down	PSBP1	hypothetical protein CDL12_09890 [Handroanthus impetiginosus]	51.61	31.87	22.4	49.05	31.89	28.15	476.57	441.86	797.38	458.67	358.99	455.86	35.83	498.22
TRINITY_DN44401_c0_g6	K02717	-	-6.2572	down	PSBP2	chloroplast PsbP1 precursor [Nicotiana benthamiana]	0	0	0	0	0	0	0	0	3.63	1.98	0	0	0	0.93
TRINITY_DN44509_c1_g1	K02639	-	-2.34228	down	fdxH	hypothetical protein CDL12_07489 [Handroanthus impetiginosus]	5.75	4.56	1.71	5.44	6.44	2.4	34.87	27.57	49.64	36.44	37.53	46.37	4.38	38.74
TRINITY_DN44722_c2_g1	K02694	-	-7.48726	down	PSAF	photosystem I reaction center subunit III, chloroplastic [Zea mays]	0	0.06	0	0	0	0	8.71	9.22	7.66	6.48	0	0	0.01	5.34
TRINITY_DN45066_c0_g2	K02701	-	-6.45451	down	PSAN	PREDICTED: photosystem I reaction center subunit N, chloroplastic [Nicotiana tomentosiformis]	0	0	0	0	0	0	0	0	8.18	4.51	0	0	0	2.11
TRINITY_DN45066_c0_g3	K02701	-	-1.99692	down	PSAN	photosystem I reaction center subunit N, chloroplastic [Sesamum indicum]	113.02	106.45	84.04	113.79	210.74	65.84	703.54	719.66	1135.78	848.15	792.65	806.22	115.65	834.33
TRINITY_DN45196_c0_g6	K02113	-	-3.36418	down	ATPD	ATP synthase delta chain, chloroplastic-like [Sesamum indicum]	21.84	15.33	12.52	15.54	34.96	16.29	359.12	284.72	447.61	348.56	368.61	299.82	19.41	351.41
TRINITY_DN45196_c0_g8	K02113	-	-1.80448	down	ATPD	ATP synthase delta chain, chloroplastic-like [Sesamum indicum]	1.78	1.99	2.53	2.03	5.29	3.85	17.17	15.62	23.8	14.98	18.22	19.91	2.91	18.28
TRINITY_DN45330_c3_g7	K02716	-	-1.33759	down	PSBO	PREDICTED: oxygen-evolving enhancer protein 1, chloroplastic [Ipomoea nil]	88.95	56.16	42	66.69	142.65	60.22	306.7	270.36	416.49	315.06	361.17	332.63	76.11	333.73
TRINITY_DN45330_c3_g9	K02716	-	-8.64039	down	PSBO	Oxygen-evolving enhancer protein 1-1 chloroplastic [Zea mays]	0	0	0	0	0	0	4.77	4.91	3.97	4.05	0	0	0	2.95
TRINITY_DN45512_c0_g1	K02705	-	1.67775	up	psbC	photosystem II 44 kDa protein (chloroplast) [Genlisea margaretae]	61.32	65.11	101.2	57.8	40.11	57.02	43.78	73.79	59.41	8.2	21.82	18.97	63.76	37.66
TRINITY_DN45908_c2_g1	K02717	-	-1.14847	down	ycf37	uncharacterized protein LOC105176091 [Sesamum indicum]	11.64	4.68	5.43	10.45	13.74	7.57	34.24	29.82	36.66	38.05	45.4	37.11	8.92	36.88
TRINITY_DN46130_c0_g5	K02634	-	2.46088	up	IQM3	IQ domain-containing protein IQM3-like isoform X2 [Sesamum indicum]	2.31	4.41	4.31	1.16	1.36	3.82	0.4	0.77	0.07	1.5	2.05	0.55	2.9	0.89
TRINITY_DN46295_c0_g1	K02637	-	1.07344	up	At1g27200	glycosyltransferase family 92 protein At1g27200-like [Hevea brasiliensis]	37.68	19.25	23.57	27.86	22.67	26.73	20.02	29.01	34.11	6.67	22.65	9.14	26.29	20.27
TRINITY_DN46381_c2_g4	K08905	-	-1.94721	down	PSAG	uncharacterized WD repeat-containing protein C2A9.03-like [Sesamum indicum]	55.92	22.35	18.99	44.78	74.04	32.01	257.31	225.46	393.24	260.42	281.39	269.54	41.35	281.23
TRINITY_DN46620_c3_g7	K02723	-	-2.83895	down	PSBY	photosystem II core complex proteins psbY, chloroplastic [Sesamum indicum]	74.01	39.79	33.84	64.73	81.6	46.86	566.35	557.37	850.74	694.08	904.86	647.21	56.81	703.44
TRINITY_DN46894_c2_g1	K02113	-	-7.51448	down	ATPD	ATP synthase delta chain [Zea mays]	0	0	0	0	0	0	3.61	3.67	3.74	2.17	0.12	0	0	2.22
TRINITY_DN46944_c2_g5	K02712	-	1.25138	up	psbK	Photosystem II reaction center protein K [Glycine soja]	4.74	4.91	7.72	5.65	4.41	4.31	5.01	4.1	6.17	1.64	3.91	4.55	5.29	4.23
TRINITY_DN48106_c0_g2	K02704	-	1.17624	up	psbB	photosystem II p680 chlorophyll A apoprotein (chloroplast) [Dunnia sinensis]	51	33.36	54.87	39.99	33.37	46.57	42.78	53.72	59.48	9.53	25.29	19.6	43.19	35.07
TRINITY_DN48466_c0_g5	K02109	-	1.97391	up	YMF19	unnamed protein product, partial [Vitis vinifera]	9.41	2.85	3.41	3.03	2.32	8.13	2.94	3.52	2.9	0	1	1.86	4.86	2.04
TRINITY_DN48692_c0_g5	K08901	-	-7.74907	down	PSBQ2	PREDICTED: oxygen-evolving enhancer protein 3-2, chloroplastic-like [Nicotiana sylvestris]	0	0	0	0	0	0	0	0	17.37	13.49	0	0	0	5.14
TRINITY_DN48775_c0_g1	K02115	-	-2.88464	down	ATPC	PREDICTED: ATP synthase gamma chain, chloroplastic [Theobroma cacao]	8.25	3.51	4.16	6.04	15.64	6.23	89.09	71.56	104.3	107.49	89.49	81.77	7.3	90.62
TRINITY_DN48938_c1_g6	K03689	-	1.75384	up	petN	cytochrome b6/f complex subunit VIII (chloroplast) [Scopolia parviflora]	8.29	7.78	13.68	9.39	6.32	7.28	5.07	5.88	6.1	1.3	5.73	5.8	8.79	4.98
[truncated: 2,789 more rows]
