# Supplementary material for: Comparative Transcriptomics and Metabolomics Analyses of Avicennia marina and Kandelia obovata under Chilling Stress during Seedling Stage
Source: Int J Mol Sci. 2023 Nov 30;24(23):16989. doi: 10.3390/ijms242316989 (PMC10707264; doi:10.3390/ijms242316989)
Supplement: Supplementary file 1 [file ijms-24-16989-s001.zip › Table S4.xlsx]

## Sheet: K.obovata
PathwayEntry
map00710
map00051
map00562
map00010
map00630
map00260
map00190
map00195
map00940
map00945
map00941
map03010
map03015
map00960
map00040
map00906
map04144
map00270
map00640
map00620
map04146
map00660
map00290
map00480
map04145
map00230
map00970
map04136
map00860
map03050
map00073
map00360
map00350
map00950
map00130
map00400
map00500
map04712
map02010
map04070
map00020
map00531
map04626
map00910
map00561
map03013
map03040
map00196
map00250
map00780
map00061
map04016
map04075
map00760
map00563
map00670
map00460
map00062
map01040
map03060
map00220
map00240
map04141
map00510
map00905
map04120
map00520
map03018
map00730
map00030
map00740
map03440
map00565
map03022
map00511
map03030
map00052
map03020
map00904
map00410
map00330
map03420
map00564
map00900
map00100
map00310
map00450
map00600
map00908
map00592
map00071
map00590
map00920
map00280
map00053
map03008
map00591
map00514
map00770
map00340
map04130
map00380
map00903
map04933
map03410
map00943
map03430
map00603
map00524
map00650
map00901
map00909
map00523
map00750
map00261
map00300
map00902
map00790
map00785
map00965
map00430
map00944
map00402
map00604
map04122
map00966
map00440
map00072
map01053
map00942
map01051
map03450
map00405
map00232
map00333
map00471
map00601

## Sheet: A.marina
PathwayEntry
map00940
map04075
map00240
map00590
map00591
map00565
map00600
map03410
map03010
map03040
map04144
map04141
map00601
map00603
map00051
map00562
map00710
map00010
map00944
map04626
map00785
map00908
map00190
map00942
map03050
map00592
map00564
map00480
map00860
map00960
map00100
map00195
map00901
map03020
map00230
map00333
map00061
map04016
map00904
map00402
map00500
map00941
map04712
map00040
map00073
map00270
map00620
map00640
map00900
map04120
map00780
map04933
map00740
map00760
map00770
map00510
map00950
map00350
map00965
map00360
map00380
map00920
map00400
map00906
map03008
map03013
map02010
map00943
map04146
map00970
map00071
map04145
map00520
map00945
map04136
map03015
map04070
map00053
map00280
map00220
map00511
map03440
map00909
map00052
map00604
map00531
map00030
map03060
map00130
map00563
map04130
map03022
map00310
map00650
map00630
map03030
map03018
map03430
map00730
map00020
map00910
map00250
map00330
map00430
map00902
map00410
map00903
map00561
map00340
map00062
map01040
map03420
map00196
map03450
map00260
map00670
map00460
map00905
map00450
map00261
map01502
map00660
map00290
map00750
map00514
map00524
map00790
map00471
map00072
map00440
map00300
map00966
map00523
map00405
map01051
