# Supplementary material for: Comparative Transcriptomics and Metabolomics Analyses of Avicennia marina and Kandelia obovata under Chilling Stress during Seedling Stage
Source: Int J Mol Sci. 2023 Nov 30;24(23):16989. doi: 10.3390/ijms242316989 (PMC10707264; doi:10.3390/ijms242316989)
Supplement: Supplementary file 1 [file ijms-24-16989-s001.zip › Table S5.xlsx]

## Sheet: K.obovata
PathwayEntry	PathwayDefinition	pvalue	Gene_ID	KOEntry	EC	log2FC	regulation	Name	Annotation	Ko_CS_1_TPM	Ko_CS_2_TPM	Ko_CS_3_TPM	Ko_CS_4_TPM	Ko_CS_5_TPM	Ko_CS_6_TPM	Ko_CK_1_TPM	Ko_CK_2_TPM	Ko_CK_3_TPM	Ko_CK_4_TPM	Ko_CK_5_TPM	Ko_CK_6_TPM	Ko_CS_mean_TPM	Ko_CK_mean_TPM
map00195	Photosynthesis	1.47195e-05	TRINITY_DN14756_c0_g1	K08901	-	2.09914	up	PSBQ1	oxygen-evolving enhancer protein 3, chloroplastic-like [Durio zibethinus]	4.99	3	6.5	7.19	6.35	5.59	1.56	1.75	0.86	0.69	3.01	2.44	5.6	1.72
map00195	Photosynthesis	1.47195e-05	TRINITY_DN20340_c0_g1	K02721	-	1.85208	up	PSBW	photosystem II reaction center W protein, chloroplastic [Sesamum indicum]	3.49	1.7	3.97	4.39	4.34	3.37	0.81	1.51	0.62	0.59	1.57	2.64	3.54	1.29
map00195	Photosynthesis	1.47195e-05	TRINITY_DN23404_c0_g1	K02693	-	2.48394	up	PSAE-1	photosystem I reaction center subunit IV B, chloroplastic [Sesamum indicum]	1.9	1.3	3.08	5.46	2.48	3.32	0.35	1.38	0.23	0	0.95	1.33	2.92	0.71
map00195	Photosynthesis	1.47195e-05	TRINITY_DN32901_c0_g1	K02639	-	8.40086	up	SEND33	PREDICTED: ferredoxin [Nicotiana sylvestris]	0	0	23.45	0	13.62	0	0	0	0	0	0	0	6.18	0
map00195	Photosynthesis	1.47195e-05	TRINITY_DN34146_c0_g1	K14332	-	7.36554	up	PSAO	PREDICTED: photosystem I subunit O-like isoform X1 [Nicotiana sylvestris]	0	0	14.02	0	8.8	0	0	0	0	0	0	0	3.8	0
map00195	Photosynthesis	1.47195e-05	TRINITY_DN34329_c0_g4	K02692	-	2.21918	up	psaD	photosystem I reaction center subunit II, chloroplastic-like [Sesamum indicum]	1.48	1.71	2.87	2.95	2.42	3.45	1.16	0.96	0.17	0.08	0.6	1.17	2.48	0.69
map00195	Photosynthesis	1.47195e-05	TRINITY_DN35011_c0_g1	K02721	-	7.30255	up	PSBW	PREDICTED: photosystem II reaction center W protein, chloroplastic-like [Nicotiana tabacum]	0	0	12.04	0	8.43	0	0	0	0	0	0	0	3.41	0
map00195	Photosynthesis	1.47195e-05	TRINITY_DN35821_c0_g1	K08902	-	-4.21085	down	PSB27-1	photosystem II repair protein PSB27-H1, chloroplastic [Morus notabilis]	2.59	3.11	3.5	4.37	13.09	6.54	181.39	149.81	142.02	147.38	77.82	110.26	5.53	134.78
map00195	Photosynthesis	1.47195e-05	TRINITY_DN36222_c0_g1	K02723	-	7.40388	up	PSBY	PREDICTED: photosystem II core complex proteins psbY, chloroplastic [Nicotiana attenuata]	0	0	5.91	0	4.95	0	0	0	0	0	0	0	1.81	0
map00195	Photosynthesis	1.47195e-05	TRINITY_DN36548_c0_g1	K02698	-	7.35173	up	PSAK	photosystem I reaction center subunit X PSI-K [Nicotiana benthamiana]	0	0	22.98	0	11.04	0	0	0	0	0	0	0	5.67	0
map00195	Photosynthesis	1.47195e-05	TRINITY_DN37637_c0_g1	K08905	-	6.74573	up	PSAG	PREDICTED: photosystem I reaction center subunit V, chloroplastic-like [Nicotiana sylvestris]	0	0	10.38	0	4.87	0	0	0	0	0	0	0	2.54	0
map00195	Photosynthesis	1.47195e-05	TRINITY_DN38244_c0_g1	K02638	-	6.21291	up	PETE	chloroplast plastocyanin precursor [Nicotiana benthamiana]	0	0	3.36	0	2.06	0	0	0	0	0	0	0	0.9	0
map00195	Photosynthesis	1.47195e-05	TRINITY_DN38244_c0_g2	K02638	-	6.9997	up	PETE	PREDICTED: plastocyanin [Nicotiana sylvestris]	0	0	6.07	0	4.06	0	0	0	0	0	0	0	1.69	0
map00195	Photosynthesis	1.47195e-05	TRINITY_DN38300_c0_g1	K02636	EC:1.10.9.1	1.54102	up	petC	cytochrome b6-f complex iron-sulfur subunit 2, chloroplastic-like protein [Cinnamomum micranthum f. kanehirae]	2.43	2.22	3.54	3.43	1.73	2.46	2.04	2.25	0.55	0.45	1.24	1.68	2.64	1.37
map00195	Photosynthesis	1.47195e-05	TRINITY_DN38300_c1_g1	K02636	EC:1.10.9.1	6.88963	up	petC2	PREDICTED: cytochrome b6-f complex iron-sulfur subunit 1, chloroplastic [Nicotiana tomentosiformis]	0	0	9.94	0	6.56	0	0	0	0	0	0	0	2.75	0
map00195	Photosynthesis	1.47195e-05	TRINITY_DN38451_c1_g1	K02638	-	2.08543	up	PETE	hypothetical protein CDL12_26119 [Handroanthus impetiginosus]	0.45	0.36	1.27	1.44	0.9	0.91	0.43	0.29	0	0	0.45	0.45	0.89	0.27
map00195	Photosynthesis	1.47195e-05	TRINITY_DN38664_c0_g1	K02693	-	7.05594	up	PSAEB	photosystem I reaction center subunit IV B, chloroplastic [Nicotiana sylvestris]	0	0	8.68	0	5.45	0	0	0	0	0	0	0	2.35	0
map00195	Photosynthesis	1.47195e-05	TRINITY_DN39475_c0_g2	K02694	-	5.2678	up	PSAF	PREDICTED: photosystem I reaction center subunit III, chloroplastic-like [Nicotiana attenuata]	0.42	1.3	13.24	0.43	6.76	0.39	0.42	0.83	0.42	0.4	0	0	3.76	0.34
map00195	Photosynthesis	1.47195e-05	TRINITY_DN39475_c0_g3	K02694	-	2.25532	up	PSAF	photosystem I reaction center subunit III, chloroplastic [Sesamum indicum]	0.93	0.96	2.8	2.23	1.58	1.17	0.27	1.33	0	0	0.4	0.64	1.61	0.44
map00195	Photosynthesis	1.47195e-05	TRINITY_DN39537_c0_g4	K02109	-	1.77222	up	ATPG	hypothetical protein CDL12_03272 [Handroanthus impetiginosus]	0.31	0.5	0.87	0.76	0.59	0.61	0.41	0.2	0.03	0	0.42	0.3	0.61	0.23
map00195	Photosynthesis	1.47195e-05	TRINITY_DN39927_c1_g1	K02699	-	8.48638	up	PSAL	PREDICTED: photosystem I reaction center subunit XI, chloroplastic-like [Nicotiana attenuata]	0	0	14.35	0	7.33	0	0	0	0	0	0	0	3.61	0
map00195	Photosynthesis	1.47195e-05	TRINITY_DN40011_c2_g1	K02694	-	2.36139	up	PSAF	Photosystem I [Handroanthus impetiginosus]	1.66	1.78	4.4	4.74	3	3.85	1.12	0.77	0	0	1.27	1.79	3.24	0.83
map00195	Photosynthesis	1.47195e-05	TRINITY_DN40241_c3_g5	K02638	-	-1.88182	down	PETE	plastocyanin [Jatropha curcas]	151.67	262	199.15	205.84	799.43	516.04	2068.24	1678.62	1673.43	2068.64	980.35	1899.62	355.69	1728.15
map00195	Photosynthesis	1.47195e-05	TRINITY_DN40253_c0_g5	K02695	-	1.94212	up	PSAH	PREDICTED: photosystem I reaction center subunit VI-2, chloroplastic-like [Solanum tuberosum]	3.13	4.17	6.64	10.27	5.87	6.62	3.27	2.74	0.76	0.11	2.58	2.92	6.12	2.06
map00195	Photosynthesis	1.47195e-05	TRINITY_DN40424_c1_g3	K02641	EC:1.18.1.2	1.2454	up	-	Ferredoxin--NADP reductase [Zea mays]	37.62	54.28	17.16	37.37	38.65	37.09	15.42	15.92	24.05	21.88	23.11	27.1	37.03	21.25
map00195	Photosynthesis	1.47195e-05	TRINITY_DN40800_c2_g1	K02639	-	-2.77746	down	FDX3	ferredoxin, root R-B2 [Populus trichocarpa]	0.16	0.08	0.23	0.59	0.29	0.24	5.86	3.45	1.1	1.44	0.76	0.4	0.27	2.17
map00195	Photosynthesis	1.47195e-05	TRINITY_DN40800_c2_g2	K02639	-	3.64909	up	FDX3	ferredoxin, root R-B2 [Ricinus communis]	668.31	705.49	708.6	737.08	467.81	617.23	109.91	65	51.47	67.64	74.76	45.51	650.75	69.05
map00195	Photosynthesis	1.47195e-05	TRINITY_DN41019_c0_g4	K08901	-	-3.19043	down	PNSL3	photosynthetic NDH subunit of lumenal location 3, chloroplastic [Prunus avium]	9.79	19.35	9.77	21.69	23.84	18.2	376.63	243.13	154.67	183.01	101.83	128.48	17.11	197.96
map00195	Photosynthesis	1.47195e-05	TRINITY_DN41358_c1_g4	K02699	-	2.1636	up	PSAL	photosystem I reaction center subunit XI, chloroplastic-like [Olea europaea var. sylvestris]	1.58	0.85	1.73	2.5	1.54	2.35	0.32	0.76	0.13	0.06	1	0.79	1.76	0.51
map00195	Photosynthesis	1.47195e-05	TRINITY_DN41499_c0_g10	K02716	-	-1.8882	down	PSBO	hypothetical protein CDL15_Pgr018374 [Punica granatum]	101.18	128.01	232	214.25	728.45	420.34	2107.66	1632.46	1451.51	1593.26	944.52	1308.08	304.04	1506.25
map00195	Photosynthesis	1.47195e-05	TRINITY_DN41499_c0_g2	K02716	-	-1.58935	down	PSBO	chloroplast PsbO4 precursor [Nicotiana benthamiana]	23.08	17.82	29.87	25.8	93.45	37.6	328.24	246.41	260.57	265.74	170.52	163.72	37.94	239.2
map00195	Photosynthesis	1.47195e-05	TRINITY_DN41499_c0_g3	K02716	-	7.99356	up	PSBO	PREDICTED: oxygen-evolving enhancer protein 1, chloroplastic [Nicotiana attenuata]	0	0	5.7	0	2.83	0	0	0	0	0	0	0	1.42	0
map00195	Photosynthesis	1.47195e-05	TRINITY_DN41762_c1_g4	K02639	-	-2.42681	down	fdxH	uncharacterized protein LOC105631988 [Jatropha curcas]	9.26	26.42	11.57	15.9	47.23	24.62	185.64	179.33	152.86	170.95	100.77	158.32	22.5	157.98
map00195	Photosynthesis	1.47195e-05	TRINITY_DN42653_c1_g3	K02693	-	-1.5042	down	PSAEA	PREDICTED: photosystem I reaction center subunit IV A, chloroplastic-like [Populus euphratica]	271.89	375.22	383.58	514.69	579.31	459.09	2153.34	1737.01	1605.06	1667.78	1136.4	1441.94	430.63	1623.59
map00195	Photosynthesis	1.47195e-05	TRINITY_DN42653_c1_g5	K02693	-	-1.54871	down	PSAE2	photosystem I reaction center subunit IV A, chloroplastic-like [Manihot esculenta]	7.35	8.44	14.66	11.2	27.37	23.83	82.02	61.42	72.8	67.3	39.66	51.31	15.47	62.42
map00195	Photosynthesis	1.47195e-05	TRINITY_DN42776_c1_g2	K02115	-	7.44147	up	-	uncharacterized protein LOC105634406 [Jatropha curcas]	0.85	0.29	4.13	1.2	0.59	0.35	0	0	0	0	0	0	1.23	0
map00195	Photosynthesis	1.47195e-05	TRINITY_DN42776_c1_g3	K02115	-	10.147	up	-	uncharacterized protein LOC105634406 [Jatropha curcas]	9.58	3.24	34.04	10.5	10.06	7.9	0.07	0	0	0	0	0	12.55	0.01
map00195	Photosynthesis	1.47195e-05	TRINITY_DN44309_c0_g10	K02692	-	-3.17598	down	psaD	PREDICTED: photosystem I reaction center subunit II, chloroplastic [Nelumbo nucifera]	72.7	95.19	48.91	103.69	209.01	137.17	1750.75	1361.95	1257.71	1272.9	899.01	1235.46	111.11	1296.3
map00195	Photosynthesis	1.47195e-05	TRINITY_DN44309_c0_g3	K02692	-	2.28584	up	psaD	PREDICTED: photosystem I reaction center subunit II, chloroplastic [Nicotiana tomentosiformis]	2.44	2.74	11.07	1.9	5.58	0.63	2.28	0.85	0.32	1.21	2	0.72	4.06	1.23
map00195	Photosynthesis	1.47195e-05	TRINITY_DN44309_c0_g7	K02692	-	-1.46079	down	psaD	photosystem I reaction center subunit II, chloroplastic [Populus trichocarpa]	145.3	211.22	223.12	255.77	494.83	356.03	1071.51	950.08	1009.53	1114.89	830.16	1112.31	281.05	1014.75
map00195	Photosynthesis	1.47195e-05	TRINITY_DN44401_c0_g1	K02717	-	2.18464	up	PSBP	hypothetical protein CDL12_06931 [Handroanthus impetiginosus]	2.97	3.22	7.29	7.09	5.21	6.28	2.09	1.35	0.39	0.24	2.25	2.57	5.34	1.48
map00195	Photosynthesis	1.47195e-05	TRINITY_DN44401_c0_g2	K02717	-	2.3306	up	PSBP1	hypothetical protein CDL12_09890 [Handroanthus impetiginosus]	1.2	0.71	1.97	2.03	1.31	1.32	0.26	0.39	0.03	0.03	0.72	0.78	1.42	0.37
map00195	Photosynthesis	1.47195e-05	TRINITY_DN44401_c0_g3	K02717	-	-3.11801	down	PSBP1	evolving complex protein 2 precursor [Populus tomentosa]	65.37	151.62	90.68	165.84	353.9	187.08	2619.72	1977.17	1865.05	1942.94	1342.01	1688.78	169.08	1905.94
map00195	Photosynthesis	1.47195e-05	TRINITY_DN44401_c0_g6	K02717	-	7.71835	up	PSBP2	chloroplast PsbP1 precursor [Nicotiana benthamiana]	0	0	5.39	0	2.98	0	0	0	0	0	0	0	1.39	0
map00195	Photosynthesis	1.47195e-05	TRINITY_DN44464_c1_g1	K02115	-	-1.14883	down	ATPC	ATP synthase gamma chain, chloroplastic [Manihot esculenta]	44.89	68.36	38.92	70.83	215.27	136.29	354.41	336.49	236.73	311.98	145.61	251.32	95.76	272.76
map00195	Photosynthesis	1.47195e-05	TRINITY_DN45066_c0_g1	K02701	-	-1.37224	down	PSAN	PREDICTED: photosystem I reaction center subunit N, chloroplastic-like [Populus euphratica]	152.34	156.99	165.92	169.81	413.36	282.14	1085.83	822.79	783.21	731.64	453.89	660.23	223.43	756.26
map00195	Photosynthesis	1.47195e-05	TRINITY_DN45066_c0_g2	K02701	-	7.24645	up	PSAN	PREDICTED: photosystem I reaction center subunit N, chloroplastic [Nicotiana tomentosiformis]	0	0	8.62	0	3.19	0	0	0	0	0	0	0	1.97	0
map00195	Photosynthesis	1.47195e-05	TRINITY_DN45066_c0_g3	K02701	-	2.40567	up	PSAN	photosystem I reaction center subunit N, chloroplastic [Sesamum indicum]	1.42	0.88	2.92	3.64	2.89	2.92	0.51	0.64	0.14	0.14	0.77	1.24	2.44	0.57
map00195	Photosynthesis	1.47195e-05	TRINITY_DN45196_c0_g3	K02113	-	-1.89411	down	ATPD	ATP synthase subunit delta, chloroplastic [Jatropha curcas]	34.71	60.6	31.88	64.97	139.76	79.05	375.82	338.82	325.67	336.23	239.86	348.17	68.49	327.43
map00195	Photosynthesis	1.47195e-05	TRINITY_DN45196_c0_g6	K02113	-	2.44819	up	ATPD	ATP synthase delta chain, chloroplastic-like [Sesamum indicum]	0.35	0.36	1.83	1.71	1.23	1.18	0.36	0.07	0.07	0	0.62	0.47	1.11	0.27
map00195	Photosynthesis	1.47195e-05	TRINITY_DN45330_c3_g7	K02716	-	1.93857	up	PSBO	PREDICTED: oxygen-evolving enhancer protein 1, chloroplastic [Ipomoea nil]	0.27	0.92	1.2	1.38	1.15	1.03	0.42	0.55	0	0	0.67	0.33	0.99	0.33
map00195	Photosynthesis	1.47195e-05	TRINITY_DN45630_c0_g2	K03541	-	1.72013	up	PSBR	hypothetical protein CDL12_06236 [Handroanthus impetiginosus]	4.16	3.18	4.75	5.79	5.51	5.32	1.55	1.41	1.56	0.98	2.8	3.07	4.79	1.9
map00195	Photosynthesis	1.47195e-05	TRINITY_DN46295_c0_g1	K02637	-	2.51732	up	At1g27200	glycosyltransferase family 92 protein At1g27200-like [Hevea brasiliensis]	40.07	26.13	61.56	31.2	22.93	36.01	16.14	30.22	12.03	15.85	16.71	15.01	36.32	17.66
map00195	Photosynthesis	1.47195e-05	TRINITY_DN46381_c2_g4	K08905	-	1.85682	up	PSAG	uncharacterized WD repeat-containing protein C2A9.03-like [Sesamum indicum]	0.68	0.46	1.33	0.92	0.81	0.94	0.35	0.48	0.07	0.02	0.4	0.54	0.86	0.31
map00195	Photosynthesis	1.47195e-05	TRINITY_DN46620_c3_g7	K02723	-	1.87379	up	PSBY	photosystem II core complex proteins psbY, chloroplastic [Sesamum indicum]	0.79	0.6	2.05	2.08	1.76	2.24	0.96	0.51	0.14	0.07	1	0.7	1.59	0.56
map00195	Photosynthesis	1.47195e-05	TRINITY_DN46691_c2_g7	K02698	-	-2.96975	down	PSAK	PREDICTED: photosystem I reaction center subunit psaK, chloroplastic [Capsicum annuum]	105.25	101.66	108.07	123.72	357.28	209.99	2334.29	1742.26	1745.74	1871.65	920.27	1693.75	167.66	1717.99
map00195	Photosynthesis	1.47195e-05	TRINITY_DN46812_c0_g1	K02716	-	-2.15151	down	PSBO	oxygen evolving enhancer protein 1 precursor [Bruguiera gymnorhiza]	79.62	112.43	132.27	167.63	499.03	281.98	1651.95	1301.21	1170.29	1195.31	739.05	1092.72	212.16	1191.76
map00195	Photosynthesis	1.47195e-05	TRINITY_DN47163_c1_g4	K02721	-	-1.36506	down	PSBW	photosystem II reaction center W protein, chloroplastic-like isoform X1 [Abrus precatorius]	703.3	817.8	519.33	860.79	2016.39	1305.06	4507.92	3861.97	3744.88	3681.81	2661.14	3464	1037.11	3653.62
map00195	Photosynthesis	1.47195e-05	TRINITY_DN47421_c0_g4	K02723	-	-4.94225	down	PSBY	photosystem II core complex proteins psbY, chloroplastic [Populus trichocarpa]	45.19	38.73	18.63	30.81	83.84	42.64	2837.62	1753.62	1615.62	1505.34	1154.83	1279.89	43.31	1691.15
map00195	Photosynthesis	1.47195e-05	TRINITY_DN47560_c0_g1	K02717	-	-3.79193	down	PNSL1	PREDICTED: photosynthetic NDH subunit of lumenal location 1, chloroplastic isoform X1 [Nelumbo nucifera]	2.01	2.29	1.44	1.19	4.86	3.55	57.8	46.34	49.57	45.08	24.23	43.51	2.56	44.42
map00195	Photosynthesis	1.47195e-05	TRINITY_DN47960_c1_g1	K02695	-	-1.52228	down	PSAH2	photosystem I reaction center subunit VI-2, chloroplastic [Vigna radiata var. radiata]	375.2	373.1	617.9	849.16	1480.26	815.26	3626.27	2741.08	2417.89	2494.7	1523.33	2200.55	751.81	2500.64
map00195	Photosynthesis	1.47195e-05	TRINITY_DN47960_c1_g4	K02695	-	2.05318	up	PSAH	photosystem I reaction center subunit VI, chloroplastic-like [Rosa chinensis]	2.1	1.58	16.94	1.79	7.9	1.55	1.18	1.67	0.23	1.07	2.09	0.56	5.31	1.13
map00195	Photosynthesis	1.47195e-05	TRINITY_DN47990_c0_g2	K02723	-	-3.48086	down	PSBY	PREDICTED: photosystem II core complex proteins psbY, chloroplastic [Vitis vinifera]	2.16	1.61	1.85	1.13	0.99	1.53	43.37	34.99	13.84	20.37	14.29	7.19	1.54	22.34
map00195	Photosynthesis	1.47195e-05	TRINITY_DN48169_c1_g7	K02694	-	-1.69543	down	PSAF	photosystem I reaction center subunit III, chloroplastic [Carica papaya]	132.82	188.92	232.16	370.34	518.45	294.16	1843.8	1282.38	1005.24	1165.83	654.63	959.24	289.48	1151.85
map00195	Photosynthesis	1.47195e-05	TRINITY_DN48248_c1_g4	K02113	-	-3.25302	down	ATPD	ATP synthase delta chain, chloroplastic [Manihot esculenta]	5.59	3.8	2.04	4.43	14.16	7.88	103	87.85	75.47	66.76	58.94	70.73	6.32	77.12
map00195	Photosynthesis	1.47195e-05	TRINITY_DN48692_c0_g5	K08901	-	8.3567	up	PSBQ2	PREDICTED: oxygen-evolving enhancer protein 3-2, chloroplastic-like [Nicotiana sylvestris]	0	0	16.24	0	10.13	0	0	0	0	0	0	0	4.39	0
map00195	Photosynthesis	1.47195e-05	TRINITY_DN48775_c0_g6	K02115	-	1.82294	up	ATPC	PREDICTED: ATP synthase gamma chain, chloroplastic [Theobroma cacao]	0.15	0.19	0.35	0.21	0.21	0.18	0.07	0.08	0.08	0.01	0.07	0.15	0.21	0.08
map00195	Photosynthesis	1.47195e-05	TRINITY_DN48829_c1_g1	K02717	-	-2.33589	down	ycf37	uncharacterized protein LOC105633932 isoform X1 [Jatropha curcas]	3.23	3.6	3.06	2.48	7.44	3.81	28.07	26.19	24.98	23.64	20.23	24.14	3.94	24.54
map00195	Photosynthesis	1.47195e-05	TRINITY_DN49371_c1_g3	K02698	-	1.8339	up	PSAK	PREDICTED: photosystem I reaction center subunit psaK, chloroplastic [Vitis vinifera]	2.85	1.71	3.14	3.97	2.69	3.3	1.22	1.05	0.45	0.43	0.7	2.64	2.94	1.08
map00195	Photosynthesis	1.47195e-05	TRINITY_DN49461_c1_g7	K02699	-	2.27471	up	PSAL	Photosystem I [Handroanthus impetiginosus]	3.28	2.07	6.73	7.96	5.01	4.09	1.73	1.4	0.07	0.48	2.13	2.11	4.86	1.32
map00195	Photosynthesis	1.47195e-05	TRINITY_DN50170_c0_g1	K02641	EC:1.18.1.2	2.40824	up	LFNR1	ferredoxin--NADP reductase, leaf isozyme, chloroplastic-like isoform X1 [Abrus precatorius]	2.3	2.51	9.72	4.18	5.47	2.66	1	0.95	0.2	0.04	1.5	1.28	4.47	0.83
map00195	Photosynthesis	1.47195e-05	TRINITY_DN50694_c0_g1	K02689	-	1.04495	up	psaA	Photosystem I P700 chlorophyll a apoprotein A1 family [Cajanus cajan]	37.34	38.32	30.51	52.09	60.75	55.93	23.11	40.43	22.59	21.13	33.59	30.42	45.82	28.54
map00195	Photosynthesis	1.47195e-05	TRINITY_DN52284_c0_g2	K02115	-	-1.29061	down	-	uncharacterized protein LOC110639487 [Hevea brasiliensis]	7.74	9.39	7.75	7.38	6.89	6.59	24.85	26.45	20.27	27.92	20.26	23.27	7.62	23.84
map00195	Photosynthesis	1.47195e-05	TRINITY_DN52692_c0_g1	K02641	EC:1.18.1.2	-1.70429	down	LFNR1	PREDICTED: ferredoxin--NADP reductase, leaf isozyme, chloroplastic [Malus domestica]	161.42	448.05	340.6	571.68	682.47	516.14	2521.89	2224.4	1872.63	1754.28	1181.71	1711.99	453.39	1877.82
map00195	Photosynthesis	1.47195e-05	TRINITY_DN53560_c1_g11	K02639	-	-1.13169	down	-	chloroplast ferredoxin I [Camellia sinensis]	126.4	143.18	192.62	162.55	580.51	334.41	906.11	675.3	694.67	973.41	393.58	807.41	256.61	741.75
map00195	Photosynthesis	1.47195e-05	TRINITY_DN53965_c4_g2	K03542	-	2.21793	up	PSBS	photosystem II 22 kDa protein, chloroplastic [Sesamum indicum]	4.7	2.93	6.15	7.68	4.59	4.85	1.42	1.67	0.48	0.46	2.67	2	5.15	1.45
map00195	Photosynthesis	1.47195e-05	TRINITY_DN54461_c1_g11	K03541	-	8.45009	up	PSBR	PREDICTED: photosystem II 10 kDa polypeptide, chloroplastic [Nicotiana sylvestris]	0	0	20.46	0	12.84	0	0	0	0	0	0	0	5.55	0
map00195	Photosynthesis	1.47195e-05	TRINITY_DN54461_c1_g2	K03541	-	3.30258	up	PSBR	photosystem II 10 kDa polypeptide, chloroplastic [Olea europaea var. sylvestris]	7.91	9.42	13.31	13.56	14.95	13.63	0.27	0	0.39	0.37	0	9.11	12.13	1.69
map00195	Photosynthesis	1.47195e-05	TRINITY_DN55642_c2_g6	K08901	-	-3.0502	down	PNSL2	oxygen evolving enhancer 3 [Populus tomentosa]	6.01	6.81	4.31	5.69	13.24	9.79	127.5	102.17	69.68	75.97	46.48	61.67	7.64	80.58
map00195	Photosynthesis	1.47195e-05	TRINITY_DN56775_c0_g3	K02703	EC:1.10.3.9	1.29055	up	psbA	photosystemIIQ(b)proteinD1 (chloroplast) [Dendrobium moniliforme]	569.95	971.04	409.93	950.23	677.16	1125.09	379.3	657.03	272.59	341.6	380.55	420.74	783.9	408.63
map00195	Photosynthesis	1.47195e-05	TRINITY_DN56964_c1_g2	K02689	-	1.07934	up	psaA	'photosystem I P700 apoprotein A1 (chloroplast) [Vicia sativa]	46.14	44.18	36.1	64.67	72.37	66.86	25.59	51.44	23.64	25.55	40.06	34.6	55.05	33.48

## Sheet: A.marina
PathwayEntry	PathwayDefinition	pvalue	Gene_ID	KOEntry	EC	log2FC	regulation	Name	Annotation	Am_CS_1_TPM	Am_CS_2_TPM	Am_CS_3_TPM	Am_CS_4_TPM	Am_CS_5_TPM	Am_CS_6_TPM	Am_CK_1_TPM	Am_CK_2_TPM	Am_CK_3_TPM	Am_CK_4_TPM	Am_CK_5_TPM	Am_CK_6_TPM	Am_CS_mean_TPM	Am_CK_mean_TPM
map00195	Photosynthesis	7.77156e-16	TRINITY_DN1618_c0_g1	K02698	-	-7.58145	down	PSAK	photosystem I reaction center 6 [Zea mays]	0	0	0	0	0	0	6.3	5.89	5.81	5.74	0	0	0	3.96
map00195	Photosynthesis	7.77156e-16	TRINITY_DN1656_c0_g1	K02695	-	-7.60146	down	PSAH	photosystem I reaction center subunit VI, chloroplastic precursor [Zea mays]	0	0	0	0	0	0	7.35	6.02	5.42	4.7	0	0	0	3.91
map00195	Photosynthesis	7.77156e-16	TRINITY_DN23404_c0_g1	K02693	-	-2.45244	down	PSAE-1	photosystem I reaction center subunit IV B, chloroplastic [Sesamum indicum]	174.15	83.68	51.11	116.56	183.88	81.09	884.01	927.86	1286.73	1115.36	1153.39	1134.84	115.08	1083.7
map00195	Photosynthesis	7.77156e-16	TRINITY_DN2788_c0_g1	K14332	-	-7.38058	down	PSAO	uncharacterized protein LOC100283848 [Zea mays]	0	0	0	0	0	0	5	6.09	6.15	4.01	0	0	0	3.54
map00195	Photosynthesis	7.77156e-16	TRINITY_DN30633_c0_g2	K02721	-	-6.50613	down	PSBW	unknown [Zea mays]	0	0	0	0	0	0	3.53	3.21	3.02	3.06	0	0	0	2.14
map00195	Photosynthesis	7.77156e-16	TRINITY_DN32901_c0_g1	K02639	-	-7.71448	down	SEND33	PREDICTED: ferredoxin [Nicotiana sylvestris]	0	0	0	0	0	0	0	0	24.28	18.15	0	0	0	7.07
map00195	Photosynthesis	7.77156e-16	TRINITY_DN34132_c0_g1	K02113	-	-1.89791	down	ATPD	uncharacterized protein LOC105173971 [Sesamum indicum]	6.5	4.45	2.87	5.6	7.25	5.55	29.22	25.75	49.16	38.53	36.16	29.52	5.37	34.72
map00195	Photosynthesis	7.77156e-16	TRINITY_DN34146_c0_g1	K14332	-	-6.59814	down	PSAO	PREDICTED: photosystem I subunit O-like isoform X1 [Nicotiana sylvestris]	0	0	0	0	0	0	0	0	14.75	9.73	0	0	0	4.08
map00195	Photosynthesis	7.77156e-16	TRINITY_DN34163_c0_g1	K02692	-	-6.77756	down	psaD	photosystem I reaction center subunit II [Zea mays]	0	0	0	0	0	0.09	7.08	7.09	9.37	6.79	0	0	0.01	5.05
map00195	Photosynthesis	7.77156e-16	TRINITY_DN34329_c0_g2	K02692	-	-2.2311	down	psaD	photosystem I reaction center subunit II, chloroplastic-like [Sesamum indicum]	86.8	42.53	34.4	80.17	125.31	52.45	464.93	493.25	804.08	587.22	576.66	436.04	70.28	560.36
map00195	Photosynthesis	7.77156e-16	TRINITY_DN34329_c0_g4	K02692	-	-2.26299	down	psaD	photosystem I reaction center subunit II, chloroplastic-like [Sesamum indicum]	176.46	81.3	62.39	178.23	180.51	97.98	908.02	875.8	1290.53	1018.53	1329.03	889.86	129.48	1051.96
map00195	Photosynthesis	7.77156e-16	TRINITY_DN35011_c0_g1	K02721	-	-6.74261	down	PSBW	PREDICTED: photosystem II reaction center W protein, chloroplastic-like [Nicotiana tabacum]	0	0	0	0	0	0	0	0	14.05	11.31	0	0	0	4.23
map00195	Photosynthesis	7.77156e-16	TRINITY_DN36189_c0_g1	K02717	-	-6.48801	down	PSBP	Oxygen-evolving enhancer protein 2-1 chloroplastic [Zea mays]	0	0.06	0	0	0.07	0	4.47	7.36	6.8	5.62	0.06	0	0.02	4.05
map00195	Photosynthesis	7.77156e-16	TRINITY_DN36222_c0_g1	K02723	-	-6.79608	down	PSBY	PREDICTED: photosystem II core complex proteins psbY, chloroplastic [Nicotiana attenuata]	0	0	0	0	0	0	0	0	9.01	4.01	0	0	0	2.17
map00195	Photosynthesis	7.77156e-16	TRINITY_DN36339_c0_g1	K02638	-	-7.55274	down	PETE	plastocyanin, chloroplastic [Zea mays]	0	0	0	0.14	0	0	12.43	14.84	13.56	12.38	0	0	0.02	8.87
map00195	Photosynthesis	7.77156e-16	TRINITY_DN36536_c0_g2	K02717	-	-1.95219	down	PNSL1	hypothetical protein CDL12_23132 [Handroanthus impetiginosus]	5.16	2.56	1.27	5.2	4.98	3.07	29.99	25.12	38.26	31.5	29.04	29.5	3.71	30.57
map00195	Photosynthesis	7.77156e-16	TRINITY_DN36548_c0_g1	K02698	-	-6.42057	down	PSAK	photosystem I reaction center subunit X PSI-K [Nicotiana benthamiana]	0	0	0	0	0	0	0	0	20.85	11.68	0	0	0	5.42
map00195	Photosynthesis	7.77156e-16	TRINITY_DN36579_c0_g1	K08905	-	-7.07857	down	PSAG	photosystem I reaction center subunit V [Zea mays]	0	0	0	0	0	0	3.77	4.77	3.57	2.66	0	0	0	2.46
map00195	Photosynthesis	7.77156e-16	TRINITY_DN37637_c0_g1	K08905	-	-5.7571	down	PSAG	PREDICTED: photosystem I reaction center subunit V, chloroplastic-like [Nicotiana sylvestris]	0	0	0	0	0	0	0	0	9.63	6.35	0	0	0	2.66
map00195	Photosynthesis	7.77156e-16	TRINITY_DN37881_c0_g13	K02109	-	1.43823	up	-	uncharacterized protein LOC114171364 [Vigna unguiculata]	5.05	1.49	2.28	5.36	2.6	6.27	2.28	5.15	1.05	0.45	2.8	2.28	3.84	2.34
map00195	Photosynthesis	7.77156e-16	TRINITY_DN37936_c0_g5	K08903	-	-3.45597	down	PSB28	hypothetical protein CDL12_18152 [Handroanthus impetiginosus]	5.7	5.32	5.43	6.47	5.64	7.15	81.42	67.88	109.95	85.7	82.24	98.63	5.95	87.64
map00195	Photosynthesis	7.77156e-16	TRINITY_DN38244_c0_g2	K02638	-	-6.23796	down	PETE	PREDICTED: plastocyanin [Nicotiana sylvestris]	0	0	0	0	0	0	0	0	6.71	4.23	0	0	0	1.82
map00195	Photosynthesis	7.77156e-16	TRINITY_DN38244_c0_g3	K02638	-	-5.78407	down	PETE	PREDICTED: plastocyanin A'/A'' [Nicotiana sylvestris]	0	0	0	0	0	0	0	0	4.66	3.89	0	0	0	1.43
map00195	Photosynthesis	7.77156e-16	TRINITY_DN38300_c1_g1	K02636	EC:1.10.9.1	-6.21858	down	petC2	PREDICTED: cytochrome b6-f complex iron-sulfur subunit 1, chloroplastic [Nicotiana tomentosiformis]	0	0	0	0	0	0	0	0	10.21	8.73	0	0	0	3.16
map00195	Photosynthesis	7.77156e-16	TRINITY_DN38451_c1_g1	K02638	-	-3.12367	down	PETE	hypothetical protein CDL12_26119 [Handroanthus impetiginosus]	31.42	14.17	9.21	34.91	49.86	11.3	330.38	318.13	418.6	324.86	418.95	378.44	25.14	364.89
map00195	Photosynthesis	7.77156e-16	TRINITY_DN38664_c0_g1	K02693	-	-6.74251	down	PSAEB	photosystem I reaction center subunit IV B, chloroplastic [Nicotiana sylvestris]	0	0	0	0	0	0	0	0	12.18	8.71	0	0	0	3.48
map00195	Photosynthesis	7.77156e-16	TRINITY_DN38844_c0_g1	K02699	-	-8.7149	down	PSAL	uncharacterized protein LOC100383080 [Zea mays]	0	0	0	0	0	0	6.41	8.03	8.07	6.13	0	0	0	4.77
map00195	Photosynthesis	7.77156e-16	TRINITY_DN38875_c0_g2	K08901	-	-2.49473	down	PNSL2	photosynthetic NDH subunit of lumenal location 2, chloroplastic [Sesamum indicum]	10.76	5.93	4.62	10.41	17.96	5.97	76.54	68.31	96.53	99.63	124.7	74.04	9.28	89.96
map00195	Photosynthesis	7.77156e-16	TRINITY_DN39101_c1_g10	K02689	-	1.13548	up	psaA	photosystem I P700 chlorophyll a apoprotein A1 (chloroplast) [Helianthus annuus]	50.31	24.88	40.67	53.44	36.92	47.95	47	61.05	32.65	5.16	33.39	22.31	42.36	33.59
map00195	Photosynthesis	7.77156e-16	TRINITY_DN39475_c0_g2	K02694	-	-3.24915	down	PSAF	PREDICTED: photosystem I reaction center subunit III, chloroplastic-like [Nicotiana attenuata]	0.93	0	0	0.42	0	2.35	0	0.45	12.5	9.51	0.93	0.86	0.62	4.04
map00195	Photosynthesis	7.77156e-16	TRINITY_DN39475_c0_g3	K02694	-	-3.59593	down	PSAF	photosystem I reaction center subunit III, chloroplastic [Sesamum indicum]	37.25	26.75	17.66	29.85	42.91	32.13	555.52	432.6	939.91	550.14	700.78	804.08	31.09	663.84
map00195	Photosynthesis	7.77156e-16	TRINITY_DN39537_c0_g4	K02109	-	-2.37555	down	ATPG	hypothetical protein CDL12_03272 [Handroanthus impetiginosus]	35.82	15.15	9.69	27.61	41.27	21.28	210.26	156.7	263.22	235.99	253.34	199.39	25.14	219.82
map00195	Photosynthesis	7.77156e-16	TRINITY_DN39537_c0_g7	K02109	-	-7.69569	down	ATPG	uncharacterized protein LOC100282566 [Zea mays]	0	0	0	0	0	0	3.21	3.94	3.8	2.82	0.07	0.07	0	2.32
map00195	Photosynthesis	7.77156e-16	TRINITY_DN39846_c1_g3	K02111	EC:3.6.3.14	3.12271	up	-	hypothetical protein BVC80_8595g9 [Macleaya cordata]	12667	23820.9	36861.5	9576.33	12689.7	13461.1	4692.19	7729.02	4235.02	1830.98	3427.2	3788.87	18179.4	4283.88
map00195	Photosynthesis	7.77156e-16	TRINITY_DN39927_c1_g1	K02699	-	-7.64998	down	PSAL	PREDICTED: photosystem I reaction center subunit XI, chloroplastic-like [Nicotiana attenuata]	0	0	0	0	0	0	0	0	13.74	9.18	0	0	0	3.82
map00195	Photosynthesis	7.77156e-16	TRINITY_DN40011_c2_g1	K02694	-	-4.44397	down	PSAF	Photosystem I [Handroanthus impetiginosus]	40.61	21.96	15.35	27.36	55.92	25.97	1005	980.93	1411.62	1322.8	1242.08	1001	31.19	1160.57
map00195	Photosynthesis	7.77156e-16	TRINITY_DN40011_c2_g14	K02694	-	-3.7712	down	PSAF	Photosystem I [Handroanthus impetiginosus]	26.09	10.97	12.14	20.3	35.29	14.75	387.7	366.93	679.2	476.49	459.75	456.23	19.92	471.05
map00195	Photosynthesis	7.77156e-16	TRINITY_DN40253_c0_g2	K02695	-	-1.48649	down	PSAH	PREDICTED: photosystem I reaction center subunit VI, chloroplastic-like [Erythranthe guttata]	5.66	1.85	0.49	8.65	3.39	4.26	13.07	16.15	18.4	17.76	17.01	12.65	4.05	15.84
map00195	Photosynthesis	7.77156e-16	TRINITY_DN40253_c0_g5	K02695	-	-2.14295	down	PSAH	PREDICTED: photosystem I reaction center subunit VI-2, chloroplastic-like [Solanum tuberosum]	472.8	161.61	165.96	328.01	469.94	228.76	2073.47	1789.1	3009.6	2252.5	2516.51	2575.08	304.51	2369.38
map00195	Photosynthesis	7.77156e-16	TRINITY_DN40424_c1_g2	K02641	EC:1.18.1.2	2.94553	up	Os07g0147900	ferredoxin--NADP reductase, root isozyme, chloroplastic [Carica papaya]	5.33	4.1	9.13	11	8.88	11.23	14.13	6.96	4.98	10.46	13.84	7.62	8.28	9.67
map00195	Photosynthesis	7.77156e-16	TRINITY_DN41358_c1_g4	K02699	-	-1.59442	down	PSAL	photosystem I reaction center subunit XI, chloroplastic-like [Olea europaea var. sylvestris]	133.85	79.88	56.45	128.6	304.71	74.13	614.45	514.82	863.88	674.8	624.46	703.13	129.6	665.92
map00195	Photosynthesis	7.77156e-16	TRINITY_DN41499_c0_g2	K02716	-	-2.33802	down	PSBO	chloroplast PsbO4 precursor [Nicotiana benthamiana]	101.04	67.44	46.19	90.2	293.53	69.74	782.33	783.94	1152.29	1091.93	916.04	966.93	111.36	948.91
map00195	Photosynthesis	7.77156e-16	TRINITY_DN41499_c0_g3	K02716	-	-6.89856	down	PSBO	PREDICTED: oxygen-evolving enhancer protein 1, chloroplastic [Nicotiana attenuata]	0	0	0	0	0	0	0	0	4.34	3.12	0	0	0	1.24
map00195	Photosynthesis	7.77156e-16	TRINITY_DN41499_c0_g5	K02716	-	-1.00158	down	PSBO	oxygen-evolving enhancer protein 1, chloroplastic [Sesamum indicum]	130.79	67.54	55.15	98.37	323.52	83.1	343.75	396.49	530.83	506.21	394.82	381.08	126.41	425.53
map00195	Photosynthesis	7.77156e-16	TRINITY_DN41926_c0_g9	K02634	-	1.10681	up	petA	cytochrome f (chloroplast) [Crescentia cujete]	4.1	2.9	4.02	3.99	2.62	4.16	4.31	3.1	4.72	1.19	3.19	1.83	3.63	3.06
map00195	Photosynthesis	7.77156e-16	TRINITY_DN42350_c1_g1	K02639	-	-1.34381	down	petF2	ferredoxin family protein [Populus tomentosa]	26.38	6.78	4.41	21.57	20.71	13.85	56.5	52.04	64.31	70.45	76.11	57.73	15.62	62.86
map00195	Photosynthesis	7.77156e-16	TRINITY_DN42354_c1_g5	K02110	-	1.49016	up	atpH	hypothetical protein Lo_he_he1Pt0180 (plastid) [Lobelia heterophylla subsp. heterophylla]	15.84	11.5	18.29	15.58	12.37	14.08	9.82	11.68	13.35	3.35	11.21	7.96	14.61	9.56
map00195	Photosynthesis	7.77156e-16	TRINITY_DN42478_c5_g4	K02714	-	1.32983	up	psbM	photosystem II protein M (chloroplast) [Phoenix dactylifera]	5.74	4.67	7.07	4.3	3.66	5.6	3.1	4.22	4.93	2.22	5.02	3.7	5.17	3.87
map00195	Photosynthesis	7.77156e-16	TRINITY_DN42598_c3_g4	K02639	-	-1.1276	down	-	ferredoxin-I [Dorcoceras hygrometricum]	18.97	8.9	6.07	16.63	18.81	8.9	45.24	35.8	67.47	45.45	43.53	54.15	13.05	48.61
map00195	Photosynthesis	7.77156e-16	TRINITY_DN42637_c1_g10	K02639	-	4.9599	up	FDX3	ferredoxin, root R-B1-like [Sesamum indicum]	5.27	17.65	10.82	5.77	6.24	12.56	0.27	0.21	0.02	0.25	2.3	0.56	9.72	0.6
map00195	Photosynthesis	7.77156e-16	TRINITY_DN42788_c0_g13	K02639	-	-2.14514	down	SEND33	hypothetical protein CDL12_00294 [Handroanthus impetiginosus]	266.12	126.84	101.98	252.25	449.24	134.13	1538.58	1291.52	2371.53	1935.26	1401.58	1537.22	221.76	1679.28
map00195	Photosynthesis	7.77156e-16	TRINITY_DN42788_c0_g6	K02639	-	-8.67158	down	FDX1	adrenodoxin, mitochondrial [Zea mays]	0	0	0	0	0	0	11.74	12.44	11.06	9.15	0	0	0	7.4
map00195	Photosynthesis	7.77156e-16	TRINITY_DN43002_c0_g5	K02109	-	1.4532	up	At4g18380	F-box protein At4g18380-like [Sesamum indicum]	11.49	7.85	7.02	17.8	8.79	8.43	8.25	7.01	12.99	7.62	8.6	12.82	10.23	9.55
map00195	Photosynthesis	7.77156e-16	TRINITY_DN43262_c0_g7	K02635	-	1.31017	up	-	PREDICTED: cytochrome b-like [Capsicum annuum]	13.35	8.31	16.08	10.19	7.08	9.98	7.88	12.19	12.57	2.29	9.3	4.71	10.83	8.16
map00195	Photosynthesis	7.77156e-16	TRINITY_DN43443_c0_g1	K02703	EC:1.10.3.9	1.2475	up	-	ATP synthase subunit 6 (mitochondrion) [Neobartsia pedicularoides]	5.11	3.82	1.81	2.54	1.23	3.47	6.92	2.22	3.92	7.35	4.34	5.11	3	4.98
map00195	Photosynthesis	7.77156e-16	TRINITY_DN44103_c1_g3	K08901	-	-8.59993	down	PSBQ1	oxygen-evolving enhancer protein 3-1 [Zea mays]	0	0	0	0	0	0	7.31	7.79	6.93	5.7	0	0	0	4.62
map00195	Photosynthesis	7.77156e-16	TRINITY_DN44401_c0_g1	K02717	-	-1.91144	down	PSBP	hypothetical protein CDL12_06931 [Handroanthus impetiginosus]	453.52	264.57	147.29	315.93	312.21	230.37	1670.09	1694.44	2280.88	2030.23	1981.43	1695.17	287.31	1892.04
map00195	Photosynthesis	7.77156e-16	TRINITY_DN44401_c0_g2	K02717	-	-2.98226	down	PSBP1	hypothetical protein CDL12_09890 [Handroanthus impetiginosus]	51.61	31.87	22.4	49.05	31.89	28.15	476.57	441.86	797.38	458.67	358.99	455.86	35.83	498.22
map00195	Photosynthesis	7.77156e-16	TRINITY_DN44401_c0_g6	K02717	-	-6.2572	down	PSBP2	chloroplast PsbP1 precursor [Nicotiana benthamiana]	0	0	0	0	0	0	0	0	3.63	1.98	0	0	0	0.93
map00195	Photosynthesis	7.77156e-16	TRINITY_DN44509_c1_g1	K02639	-	-2.34228	down	fdxH	hypothetical protein CDL12_07489 [Handroanthus impetiginosus]	5.75	4.56	1.71	5.44	6.44	2.4	34.87	27.57	49.64	36.44	37.53	46.37	4.38	38.74
map00195	Photosynthesis	7.77156e-16	TRINITY_DN44722_c2_g1	K02694	-	-7.48726	down	PSAF	photosystem I reaction center subunit III, chloroplastic [Zea mays]	0	0.06	0	0	0	0	8.71	9.22	7.66	6.48	0	0	0.01	5.34
map00195	Photosynthesis	7.77156e-16	TRINITY_DN45066_c0_g2	K02701	-	-6.45451	down	PSAN	PREDICTED: photosystem I reaction center subunit N, chloroplastic [Nicotiana tomentosiformis]	0	0	0	0	0	0	0	0	8.18	4.51	0	0	0	2.11
map00195	Photosynthesis	7.77156e-16	TRINITY_DN45066_c0_g3	K02701	-	-1.99692	down	PSAN	photosystem I reaction center subunit N, chloroplastic [Sesamum indicum]	113.02	106.45	84.04	113.79	210.74	65.84	703.54	719.66	1135.78	848.15	792.65	806.22	115.65	834.33
map00195	Photosynthesis	7.77156e-16	TRINITY_DN45196_c0_g6	K02113	-	-3.36418	down	ATPD	ATP synthase delta chain, chloroplastic-like [Sesamum indicum]	21.84	15.33	12.52	15.54	34.96	16.29	359.12	284.72	447.61	348.56	368.61	299.82	19.41	351.41
map00195	Photosynthesis	7.77156e-16	TRINITY_DN45196_c0_g8	K02113	-	-1.80448	down	ATPD	ATP synthase delta chain, chloroplastic-like [Sesamum indicum]	1.78	1.99	2.53	2.03	5.29	3.85	17.17	15.62	23.8	14.98	18.22	19.91	2.91	18.28
map00195	Photosynthesis	7.77156e-16	TRINITY_DN45330_c3_g7	K02716	-	-1.33759	down	PSBO	PREDICTED: oxygen-evolving enhancer protein 1, chloroplastic [Ipomoea nil]	88.95	56.16	42	66.69	142.65	60.22	306.7	270.36	416.49	315.06	361.17	332.63	76.11	333.73
map00195	Photosynthesis	7.77156e-16	TRINITY_DN45330_c3_g9	K02716	-	-8.64039	down	PSBO	Oxygen-evolving enhancer protein 1-1 chloroplastic [Zea mays]	0	0	0	0	0	0	4.77	4.91	3.97	4.05	0	0	0	2.95
map00195	Photosynthesis	7.77156e-16	TRINITY_DN45512_c0_g1	K02705	-	1.67775	up	psbC	photosystem II 44 kDa protein (chloroplast) [Genlisea margaretae]	61.32	65.11	101.2	57.8	40.11	57.02	43.78	73.79	59.41	8.2	21.82	18.97	63.76	37.66
map00195	Photosynthesis	7.77156e-16	TRINITY_DN45908_c2_g1	K02717	-	-1.14847	down	ycf37	uncharacterized protein LOC105176091 [Sesamum indicum]	11.64	4.68	5.43	10.45	13.74	7.57	34.24	29.82	36.66	38.05	45.4	37.11	8.92	36.88
map00195	Photosynthesis	7.77156e-16	TRINITY_DN46130_c0_g5	K02634	-	2.46088	up	IQM3	IQ domain-containing protein IQM3-like isoform X2 [Sesamum indicum]	2.31	4.41	4.31	1.16	1.36	3.82	0.4	0.77	0.07	1.5	2.05	0.55	2.9	0.89
map00195	Photosynthesis	7.77156e-16	TRINITY_DN46295_c0_g1	K02637	-	1.07344	up	At1g27200	glycosyltransferase family 92 protein At1g27200-like [Hevea brasiliensis]	37.68	19.25	23.57	27.86	22.67	26.73	20.02	29.01	34.11	6.67	22.65	9.14	26.29	20.27
map00195	Photosynthesis	7.77156e-16	TRINITY_DN46381_c2_g4	K08905	-	-1.94721	down	PSAG	uncharacterized WD repeat-containing protein C2A9.03-like [Sesamum indicum]	55.92	22.35	18.99	44.78	74.04	32.01	257.31	225.46	393.24	260.42	281.39	269.54	41.35	281.23
map00195	Photosynthesis	7.77156e-16	TRINITY_DN46620_c3_g7	K02723	-	-2.83895	down	PSBY	photosystem II core complex proteins psbY, chloroplastic [Sesamum indicum]	74.01	39.79	33.84	64.73	81.6	46.86	566.35	557.37	850.74	694.08	904.86	647.21	56.81	703.44
map00195	Photosynthesis	7.77156e-16	TRINITY_DN46894_c2_g1	K02113	-	-7.51448	down	ATPD	ATP synthase delta chain [Zea mays]	0	0	0	0	0	0	3.61	3.67	3.74	2.17	0.12	0	0	2.22
map00195	Photosynthesis	7.77156e-16	TRINITY_DN46944_c2_g5	K02712	-	1.25138	up	psbK	Photosystem II reaction center protein K [Glycine soja]	4.74	4.91	7.72	5.65	4.41	4.31	5.01	4.1	6.17	1.64	3.91	4.55	5.29	4.23
map00195	Photosynthesis	7.77156e-16	TRINITY_DN48106_c0_g2	K02704	-	1.17624	up	psbB	photosystem II p680 chlorophyll A apoprotein (chloroplast) [Dunnia sinensis]	51	33.36	54.87	39.99	33.37	46.57	42.78	53.72	59.48	9.53	25.29	19.6	43.19	35.07
map00195	Photosynthesis	7.77156e-16	TRINITY_DN48466_c0_g5	K02109	-	1.97391	up	YMF19	unnamed protein product, partial [Vitis vinifera]	9.41	2.85	3.41	3.03	2.32	8.13	2.94	3.52	2.9	0	1	1.86	4.86	2.04
map00195	Photosynthesis	7.77156e-16	TRINITY_DN48692_c0_g5	K08901	-	-7.74907	down	PSBQ2	PREDICTED: oxygen-evolving enhancer protein 3-2, chloroplastic-like [Nicotiana sylvestris]	0	0	0	0	0	0	0	0	17.37	13.49	0	0	0	5.14
map00195	Photosynthesis	7.77156e-16	TRINITY_DN48775_c0_g1	K02115	-	-2.88464	down	ATPC	PREDICTED: ATP synthase gamma chain, chloroplastic [Theobroma cacao]	8.25	3.51	4.16	6.04	15.64	6.23	89.09	71.56	104.3	107.49	89.49	81.77	7.3	90.62
map00195	Photosynthesis	7.77156e-16	TRINITY_DN48938_c1_g6	K03689	-	1.75384	up	petN	cytochrome b6/f complex subunit VIII (chloroplast) [Scopolia parviflora]	8.29	7.78	13.68	9.39	6.32	7.28	5.07	5.88	6.1	1.3	5.73	5.8	8.79	4.98
map00195	Photosynthesis	7.77156e-16	TRINITY_DN49371_c1_g3	K02698	-	-1.81912	down	PSAK	PREDICTED: photosystem I reaction center subunit psaK, chloroplastic [Vitis vinifera]	261	194.83	137.66	186.35	348.96	169.59	1070.43	1003.98	1945.19	1212.41	958	1720.12	216.4	1318.36
map00195	Photosynthesis	7.77156e-16	TRINITY_DN49461_c1_g7	K02699	-	-1.61184	down	PSAL	Photosystem I [Handroanthus impetiginosus]	366.22	296.46	262.21	337.35	536.67	230.67	1603.88	1723.77	2403.11	1727.92	1721.81	1764.39	338.26	1824.15
map00195	Photosynthesis	7.77156e-16	TRINITY_DN49664_c1_g6	K02707	-	1.40513	up	psbE	photosystem II cytochrome b559 alpha subunit chloroplast [Cinnamomum micranthum f. kanehirae]	28.14	30.09	53.13	27.53	19.28	32.06	25.19	32.4	35.6	7.29	25.26	14.24	31.71	23.33
map00195	Photosynthesis	7.77156e-16	TRINITY_DN50170_c0_g1	K02641	EC:1.18.1.2	-1.89284	down	LFNR1	ferredoxin--NADP reductase, leaf isozyme, chloroplastic-like isoform X1 [Abrus precatorius]	241.35	85.27	43.09	160.12	411.79	98.43	991.85	891.57	1244.6	1476.39	1006.27	810.35	173.34	1070.17
map00195	Photosynthesis	7.77156e-16	TRINITY_DN50170_c0_g6	K02641	EC:1.18.1.2	-6.99769	down	Os06g0107700	ferredoxin [Zea mays]	0.04	0	0	0	0	0	3.4	4.25	4.38	2.79	0	0	0.01	2.47
map00195	Photosynthesis	7.77156e-16	TRINITY_DN50332_c0_g5	K02693	-	-8.66681	down	PSAE	Photosystem I reaction center subunit IV, chloroplastic [Zea mays]	0	0	0	0	0	0	10.52	11.97	11.91	8.4	0	0	0	7.13
map00195	Photosynthesis	7.77156e-16	TRINITY_DN50585_c0_g1	K02108	-	1.33133	up	-	hypothetical protein BVRB_041110, partial [Beta vulgaris subsp. vulgaris]	7.02	8.56	12.53	6.86	3.76	10.04	7.67	7.2	3.51	2.63	17.32	1.73	8.13	6.68
map00195	Photosynthesis	7.77156e-16	TRINITY_DN50694_c0_g1	K02689	-	1.28603	up	psaA	Photosystem I P700 chlorophyll a apoprotein A1 family [Cajanus cajan]	31.29	15.81	23.57	28.66	18.82	23.56	24.23	29.4	20.76	3.16	16.54	8.03	23.62	17.02
map00195	Photosynthesis	7.77156e-16	TRINITY_DN51714_c0_g1	K02690	-	1.13841	up	psaB	photosystem I P700 chlorophyll a apoprotein A2 (chloroplast) [Echinacanthus longipes]	52.66	26.01	33.22	53.62	40.18	49.06	43.11	58.58	40.68	7.72	30.48	17.94	42.46	33.09
map00195	Photosynthesis	7.77156e-16	TRINITY_DN51886_c0_g4	K02636	EC:1.10.9.1	-8.77415	down	petC	cytochrome b6-f complex iron-sulfur subunit [Zea mays]	0	0	0	0	0	0	7.79	7.14	7.04	6.97	0	0	0	4.82
map00195	Photosynthesis	7.77156e-16	TRINITY_DN52355_c1_g11	K02111	EC:3.6.3.14	1.02047	up	atpA	ATP synthase CF1 alpha subunit (plastid) [Ruellia breedlovei]	10.63	6.04	10.06	11.72	9.34	10.97	10.94	9.99	13.61	2.46	8.52	6.15	9.79	8.61
map00195	Photosynthesis	7.77156e-16	TRINITY_DN52355_c1_g4	K02109	-	1.32608	up	atpF	ATP synthase CF0 B subunit (chloroplast) [Perilla frutescens]	22.67	11.89	18.23	18.16	19.52	21.49	16.34	20.25	18.45	3.91	10.03	10.06	18.66	13.17
map00195	Photosynthesis	7.77156e-16	TRINITY_DN52443_c1_g1	K02706	EC:1.10.3.9	1.86725	up	psbD	photosystem II protein D2 [Populus alba]	56.41	54.34	86	40.37	27.22	44.83	25.81	57.52	51.06	5.15	14.88	10.83	51.53	27.54
map00195	Photosynthesis	7.77156e-16	TRINITY_DN54248_c1_g2	K02635	-	1.33419	up	petB	PetB (chloroplast) [Ailanthus altissima]	38.79	21.44	34.07	34.31	26.03	32.96	26.01	32.26	34.44	6.53	19.61	14.97	31.27	22.3
map00195	Photosynthesis	7.77156e-16	TRINITY_DN54461_c1_g11	K03541	-	-7.64276	down	PSBR	PREDICTED: photosystem II 10 kDa polypeptide, chloroplastic [Nicotiana sylvestris]	0	0	0	0	0	0	0	0	19.47	15.56	0	0	0	5.84
map00195	Photosynthesis	7.77156e-16	TRINITY_DN54510_c0_g3	K02112	EC:3.6.3.14	1.34094	up	atpB	ATP synthase CF1 beta subunit (plastid) [Penstemon fruticosus]	6.85	7.53	13.4	6.95	6.75	8.26	8.56	9.92	9.27	1.32	4.74	3.52	8.29	6.22
map00195	Photosynthesis	7.77156e-16	TRINITY_DN54510_c0_g9	K02112	EC:3.6.3.14	1.61113	up	atpE	putative ATP synthase subunit beta protein [Helianthus annuus]	8.51	9.91	22.11	12.08	5.26	10.11	7.4	10.6	9.53	0.8	8.94	6.66	11.33	7.32
map00195	Photosynthesis	7.77156e-16	TRINITY_DN55461_c1_g2	K02637	-	1.12325	up	petD	PetD (chloroplast) [Hydrocera triflora]	27.09	16.76	12.82	25.15	22.87	23.33	18.84	20.67	27.46	8.48	16.48	7.25	21.34	16.53
map00195	Photosynthesis	7.77156e-16	TRINITY_DN55852_c2_g1	K02109	-	1.42811	up	atpF	ATP synthase CF0 subunit I (plastid) [Plukenetia volubilis]	16.75	11.97	19.63	13.87	14.29	17.26	14.3	12.94	16.92	3.66	9	7.49	15.63	10.72
map00195	Photosynthesis	7.77156e-16	TRINITY_DN55852_c2_g4	K02108	-	1.4539	up	atpI	ATP synthase F0, A subunit [Cinnamomum micranthum f. kanehirae]	5.83	3.78	6.02	5.9	5.31	5.06	4.7	4.84	4.79	1.84	2.57	2.26	5.32	3.5
map00195	Photosynthesis	7.77156e-16	TRINITY_DN56669_c1_g2	K02705	-	1.81162	up	psbC	photosystem II 44 kDa protein (chloroplast) [Corylus avellana]	20.04	21.59	34.2	17.62	11.85	17.36	13.77	21.28	19.49	2.06	5.31	4.28	20.44	11.03
map00195	Photosynthesis	7.77156e-16	TRINITY_DN56775_c0_g3	K02703	EC:1.10.3.9	2.66202	up	psbA	photosystemIIQ(b)proteinD1 (chloroplast) [Dendrobium moniliforme]	709.26	808.46	932.5	577.28	529.69	605.93	210.07	430.53	239.96	45.71	164.55	119.9	693.85	201.79
map00195	Photosynthesis	7.77156e-16	TRINITY_DN56964_c1_g2	K02689	-	1.15171	up	psaA	'photosystem I P700 apoprotein A1 (chloroplast) [Vicia sativa]	92.42	45.65	70.22	102.12	63.24	81.12	75.57	99.67	70.56	10.43	58.75	35.02	75.8	58.33
map00195	Photosynthesis	7.77156e-16	TRINITY_DN58792_c0_g1	K08901	-	-3.12703	down	PNSL3	photosynthetic NDH subunit of lumenal location 3, chloroplastic [Sesamum indicum]	1.83	0.9	0.46	1.04	1.89	0.07	16.73	12.49	18.51	17.97	11.18	17.25	1.03	15.69
map00195	Photosynthesis	7.77156e-16	TRINITY_DN58874_c0_g1	K08902	-	-2.50949	down	PSB27-1	photosystem II repair protein PSB27-H1, chloroplastic [Coffea eugenioides]	8.4	25.2	16.51	12.07	14.46	4.36	128.17	135.36	203.74	131.22	186.25	117.83	13.5	150.43
map00195	Photosynthesis	7.77156e-16	TRINITY_DN6100_c0_g1	K03541	-	-8.39676	down	PSBR	unknown [Zea mays]	0	0	0	0	0	0	13.7	12.16	11.12	9.9	0	0	0	7.81
map00195	Photosynthesis	7.77156e-16	TRINITY_DN72_c0_g1	K02701	-	-7.50938	down	PSAN	Photosystem I reaction center subunit N, chloroplastic [Zea mays]	0	0	0	0	0	0	5.33	4.77	4.81	3.75	0	0	0	3.11
