# Supplementary material for: Comparative Transcriptomics and Metabolomics Analyses of Avicennia marina and Kandelia obovata under Chilling Stress during Seedling Stage
Source: Int J Mol Sci. 2023 Nov 30;24(23):16989. doi: 10.3390/ijms242316989 (PMC10707264; doi:10.3390/ijms242316989)
Supplement: Supplementary file 1 [file ijms-24-16989-s001.zip › Table S6.xlsx]

## Sheet: K.obovata
PathwayEntry	PathwayDefinition	pvalue	Gene_ID	KOEntry	EC	log2FC	regulation	Name	Annotation	Ko_CS_1_TPM	Ko_CS_2_TPM	Ko_CS_3_TPM	Ko_CS_4_TPM	Ko_CS_5_TPM	Ko_CS_6_TPM	Ko_CK_1_TPM	Ko_CK_2_TPM	Ko_CK_3_TPM	Ko_CK_4_TPM	Ko_CK_5_TPM	Ko_CK_6_TPM	Ko_CS_mean_TPM	Ko_CK_mean_TPM
map04016	MAPK signaling pathway - plant	0.00730344	TRINITY_DN41901_c1_g1	K13420	EC:2.7.11.1	5.80466	up	XA21	probable LRR receptor-like serine/threonine-protein kinase At3g47570 [Hevea brasiliensis]	9.14	2.61	6.08	2.66	5.18	5.32	0.07	0.02	0.37	0.02	0	0.27	5.17	0.12
map04016	MAPK signaling pathway - plant	0.00730344	TRINITY_DN52175_c0_g1	K13420	EC:2.7.11.1	1.01914	up	XA21	hypothetical protein MANES_10G068500 [Manihot esculenta]	14.07	11.05	8.35	7.23	4.79	15.54	6.14	7.41	6.41	6.56	5.86	7.3	10.17	6.61
map04016	MAPK signaling pathway - plant	0.00730344	TRINITY_DN42227_c1_g2	K13423	-	5.13149	up	WRKY75	probable WRKY transcription factor 75 [Populus trichocarpa]	28.5	61.47	49.43	33.6	36.28	84.87	0.11	0.11	1.5	0.66	3.36	4.63	49.02	1.73
map04016	MAPK signaling pathway - plant	0.00730344	TRINITY_DN44576_c1_g1	K13423	-	7.4011	up	WRKY75	probable WRKY transcription factor 75 [Manihot esculenta]	291.09	89.13	187.28	177.65	93.89	265.48	0.79	0.99	1.31	0.94	1.5	3.13	184.09	1.44
map04016	MAPK signaling pathway - plant	0.00730344	TRINITY_DN48110_c1_g7	K13424	-	4.39821	up	WRKY75	WRKY domain containing protein [Trema orientale]	10.3	3.3	7.95	3.47	1.34	6.43	0	0	0	0.54	0.19	1.27	5.46	0.33
map04016	MAPK signaling pathway - plant	0.00730344	TRINITY_DN55778_c2_g2	K13423	-	4.98077	up	WRKY75	hypothetical protein DVH24_025113 [Malus domestica]	48.35	20.96	24.78	14.94	5.88	31.5	0.53	0.48	0.75	1.08	0.84	2.29	24.4	0.99
map04016	MAPK signaling pathway - plant	0.00730344	TRINITY_DN46203_c1_g5	K13424	-	3.68451	up	WRKY72	probable WRKY transcription factor 72 [Hevea brasiliensis]	0.67	0.19	4.9	0.92	1.35	1.03	0.03	0	0.1	0.1	0.03	0.72	1.51	0.16
map04016	MAPK signaling pathway - plant	0.00730344	TRINITY_DN48145_c0_g1	K13425	-	4.11791	up	WRKY7	WRKY transcription factor 58 [Manihot esculenta]	557.77	516.42	616.66	637.17	867.28	503.84	12.42	17.54	89.85	53.79	57.13	69.48	616.52	50.03
map04016	MAPK signaling pathway - plant	0.00730344	TRINITY_DN52993_c0_g2	K13425	-	1.85407	up	WRKY7	probable WRKY transcription factor 7 [Manihot esculenta]	53.05	25.59	98.06	46.04	64.67	47.21	2.25	3.07	24.29	24.26	57.84	34.97	55.77	24.45
map04016	MAPK signaling pathway - plant	0.00730344	TRINITY_DN50646_c1_g4	K13425	-	2.97034	up	WRKY65	PREDICTED: probable WRKY transcription factor 65 [Juglans regia]	18.01	15.21	23.44	18.41	17.9	14.27	1.83	2.43	3.64	4.35	2.4	3.92	17.87	3.1
map04016	MAPK signaling pathway - plant	0.00730344	TRINITY_DN50646_c1_g5	K13425	-	1.97527	up	WRKY65	probable WRKY transcription factor 65 [Populus trichocarpa]	61.17	39.92	23.05	23.21	26.61	49.37	15.19	13.36	12.34	15.03	7.8	10.06	37.22	12.3
map04016	MAPK signaling pathway - plant	0.00730344	TRINITY_DN46153_c6_g14	K13424	-	5.0608	up	WRKY56	probable WRKY transcription factor 43 [Durio zibethinus]	1.17	0.2	5.15	1.2	1.75	3.16	0	0	0	0	0	0.38	2.1	0.06
map04016	MAPK signaling pathway - plant	0.00730344	TRINITY_DN43161_c1_g1	K13424	-	-1.99123	down	WRKY51	PREDICTED: probable WRKY transcription factor 51 [Populus euphratica]	3.1	1.21	0.88	0.26	3.12	3.57	0.04	0.57	5.03	21.97	11.75	25.63	2.02	10.83
map04016	MAPK signaling pathway - plant	0.00730344	TRINITY_DN45347_c0_g1	K13424	-	1.74053	up	WRKY48	PREDICTED: probable WRKY transcription factor 48 [Populus euphratica]	12.18	25.77	24.42	21.03	14.76	15.84	1.24	2.57	14.54	3.78	6.19	10.85	19	6.53
map04016	MAPK signaling pathway - plant	0.00730344	TRINITY_DN46153_c6_g2	K13424	-	-1.13683	down	WRKY44	WRKY transcription factor 44 isoform X2 [Herrania umbratica]	4.36	4.79	1.65	3.18	5.26	6.44	8.16	13.12	15.99	10.43	16.24	9.61	4.28	12.26
map04016	MAPK signaling pathway - plant	0.00730344	TRINITY_DN41765_c0_g2	K13424	-	2.6791	up	WRKY40	probable WRKY transcription factor 40 [Hevea brasiliensis]	83.25	22.99	25.67	23.69	46	76.52	0.48	1.11	5.64	5.56	18.83	17.99	46.35	8.27
map04016	MAPK signaling pathway - plant	0.00730344	TRINITY_DN52475_c1_g1	K13424	-	4.60295	up	WRKY40	probable WRKY transcription factor 40 [Ricinus communis]	14.14	0.28	28.48	1.29	3.72	6.79	0.81	0.05	0.14	1.08	0.09	1.27	9.12	0.57
map04016	MAPK signaling pathway - plant	0.00730344	TRINITY_DN43291_c0_g1	K13425	-	-1.77259	down	WRKY35	probable WRKY transcription factor 65 [Hevea brasiliensis]	12.45	7.69	12.22	3.8	11.98	11.78	47.52	69.47	30.14	45.39	36.96	39.2	9.99	44.78
map04016	MAPK signaling pathway - plant	0.00730344	TRINITY_DN47846_c3_g2	K13424	-	2.47293	up	WRKY33	probable WRKY transcription factor 33 [Hevea brasiliensis]	275.13	92.67	170.39	96.45	106.24	114.66	1.7	3.02	38.3	25.04	74.41	62.32	142.59	34.13
map04016	MAPK signaling pathway - plant	0.00730344	TRINITY_DN55964_c0_g12	K13424	-	3.08139	up	WRKY33	probable WRKY transcription factor 33 [Hevea brasiliensis]	2.87	0.65	4.15	0.38	1.03	1.35	0.07	0	0.52	0.13	0.45	0.47	1.74	0.27
map04016	MAPK signaling pathway - plant	0.00730344	TRINITY_DN44026_c0_g2	K13424	-	4.7533	up	WRKY28	probable WRKY transcription factor 71 [Populus trichocarpa]	17.66	12.46	37.25	14.08	20.6	27.4	0.34	0.62	1.59	0.41	0.5	3.45	21.58	1.15
map04016	MAPK signaling pathway - plant	0.00730344	TRINITY_DN51910_c0_g1	K13424	-	4.93832	up	WRKY28	probable WRKY transcription factor 28 [Hevea brasiliensis]	24.81	19.76	41.9	21.02	29.28	26.48	0.98	1.58	1.65	0.1	0.11	2.02	27.21	1.07
map04016	MAPK signaling pathway - plant	0.00730344	TRINITY_DN39779_c0_g5	K13424	-	2.3937	up	WRKY24	probable WRKY transcription factor 33 [Hevea brasiliensis]	283.02	99.2	174.56	116.75	127.05	125.25	1.78	1.21	39.96	26.87	93.95	71.29	154.3	39.18
map04016	MAPK signaling pathway - plant	0.00730344	TRINITY_DN41602_c0_g4	K13424	-	5.50216	up	WRKY24	WRKY transcription factor WRKY24-like isoform X2 [Abrus precatorius]	250.61	293.59	132.63	237.32	175.17	216.43	1.15	2.21	8.72	4.91	12.94	7.22	217.63	6.19
map04016	MAPK signaling pathway - plant	0.00730344	TRINITY_DN44714_c1_g1	K13424	-	3.05182	up	WRKY24	WRKY transcription factor WRKY24-like isoform X2 [Abrus precatorius]	799.16	415.35	693.66	667.04	482.84	611.45	11.03	14.08	103.3	119.41	193.27	165.46	611.58	101.09
map04016	MAPK signaling pathway - plant	0.00730344	TRINITY_DN45333_c0_g8	K13424	-	3.12507	up	WRKY24	WRKY transcription factor 4 [(Populus tomentosa x Populus bolleana) x Populus tomentosa]	642.4	315.57	523.28	496.4	409.36	431.97	8.58	7.27	72.56	68.56	125.21	116.76	469.83	66.49
map04016	MAPK signaling pathway - plant	0.00730344	TRINITY_DN47838_c0_g1	K13424	-	5.41762	up	WRKY24	PREDICTED: probable WRKY transcription factor 25 [Populus euphratica]	186.57	224.71	78.66	159.78	122.68	152.8	0.8	1.53	4.89	3.19	10.95	7.2	154.2	4.76
map04016	MAPK signaling pathway - plant	0.00730344	TRINITY_DN55570_c0_g3	K13424	-	5.92203	up	WRKY24	WRKY DNA-binding protein 33 isoform 1 [Theobroma cacao]	56.24	75.59	23.48	48.9	45.63	56.1	0.55	0.4	1.73	1.79	0.93	1.04	50.99	1.07
map04016	MAPK signaling pathway - plant	0.00730344	TRINITY_DN55570_c0_g7	K13424	-	3.05291	up	WRKY24	WRKY transcription factor WRKY24-like isoform X2 [Abrus precatorius]	606.31	317.54	515.12	489.5	407.17	440.02	7.48	7.67	73.45	84.11	145.88	139.03	462.61	76.27
map04016	MAPK signaling pathway - plant	0.00730344	TRINITY_DN52277_c3_g1	K13425	-	-1.34998	down	WRKY22	WRKY transcription factor 22 [Jatropha curcas]	2.81	1.98	3.18	5.08	5.49	4.49	3.26	2.56	15.49	23.74	18.38	17.16	3.84	13.43
map04016	MAPK signaling pathway - plant	0.00730344	TRINITY_DN49407_c1_g1	K13425	-	1.60774	up	WRKY21	probable WRKY transcription factor 21 [Ricinus communis]	22.04	49.34	28.9	60.91	48.39	30.37	11.52	17.89	21.28	16.37	18.27	15.38	39.99	16.79
map04016	MAPK signaling pathway - plant	0.00730344	TRINITY_DN48725_c1_g3	K13425	-	4.4795	up	WRKY15	probable WRKY transcription factor 15 isoform X1 [Manihot esculenta]	21.54	43.27	8.12	57.87	80.27	33.2	0.81	1.42	2.81	1.95	4.13	2.96	40.71	2.35
map04016	MAPK signaling pathway - plant	0.00730344	TRINITY_DN42742_c3_g12	K13424	-	-3.39742	down	WRKY13	probable WRKY transcription factor 13 [Manihot esculenta]	0.07	0.14	0.07	0	0.32	0	1.41	0.42	0.82	3.03	1.84	1.4	0.1	1.49
map04016	MAPK signaling pathway - plant	0.00730344	TRINITY_DN43478_c1_g3	K20725	-	8.47798	up	VQ8	VQ motif-containing protein 8, chloroplastic-like [Hevea brasiliensis]	167.86	18.29	133.05	48.91	65.02	56.21	0.66	0.26	0.15	0.39	0.05	0.2	81.56	0.28
map04016	MAPK signaling pathway - plant	0.00730344	TRINITY_DN41965_c1_g5	K20557	-	1.71987	up	VIP1	transcription factor VIP1-like [Hevea brasiliensis]	10.46	12.48	14.69	20.95	13.3	12.97	6.75	6.16	5.66	5.54	4.29	5.5	14.14	5.65
map04016	MAPK signaling pathway - plant	0.00730344	TRINITY_DN52230_c5_g2	K14498	EC:2.7.11.1	-2.72239	down	SRK2I	serine/threonine-protein kinase SRK2E-like isoform X1 [Abrus precatorius]	4.17	8.06	6.63	5.58	4.99	4.55	61.29	55.9	45.02	47.87	32.7	46.29	5.66	48.18
map04016	MAPK signaling pathway - plant	0.00730344	TRINITY_DN45114_c0_g3	K14498	EC:2.7.11.1	3.51127	up	SRK2E	PREDICTED: serine/threonine-protein kinase SRK2E [Ipomoea nil]	48.21	58.59	36.29	44.52	33.74	35.56	5.12	5.39	4.53	5.01	5.76	4.72	42.82	5.09
map04016	MAPK signaling pathway - plant	0.00730344	TRINITY_DN52465_c0_g4	K14498	EC:2.7.11.1	-1.3696	down	SRK2A	serine/threonine-protein kinase SRK2A [Populus trichocarpa]	7.41	11.34	12.44	14.97	8.13	7.53	33.04	37.49	33.51	40.26	31.48	28.73	10.3	34.08
map04016	MAPK signaling pathway - plant	0.00730344	TRINITY_DN49633_c0_g1	K02183	-	8.15087	up	SPAC22A12.06c	esterase FUS5-like [Manihot esculenta]	60.93	14.47	244.78	54.3	36.89	40.12	0.57	1.05	0.25	0.37	0.39	0.13	75.25	0.46
map04016	MAPK signaling pathway - plant	0.00730344	TRINITY_DN39103_c0_g1	K13416	EC:2.7.10.1 2.7.11.1	-1.83829	down	SERK1	leucine-rich repeat protein 1-like [Hevea brasiliensis]	1.86	1.18	0.69	1	1.53	0.42	1.74	4.71	3.15	6.9	7.2	9.78	1.11	5.58
map04016	MAPK signaling pathway - plant	0.00730344	TRINITY_DN37135_c0_g1	K14498	EC:2.7.11.1	-1.09986	down	SAPK7	serine/threonine-protein kinase SRK2A-like [Momordica charantia]	6.05	11.62	6.98	5.9	7.29	5.61	19.96	17.36	15.36	24.75	25.04	17.54	7.24	20
map04016	MAPK signaling pathway - plant	0.00730344	TRINITY_DN42642_c2_g1	K14498	EC:2.7.11.1	-1.39634	down	SAPK2	serine/threonine-protein kinase SAPK2 [Ziziphus jujuba]	11.07	7.94	9.56	7.83	9.36	7.26	32.54	34.29	28.03	28.62	30.17	28.42	8.84	30.34
map04016	MAPK signaling pathway - plant	0.00730344	TRINITY_DN41549_c3_g1	K14498	EC:2.7.11.1	4.07791	up	SAPK10	Serine/threonine-protein kinase SRK2E [Vitis vinifera]	46.3	63.34	31.34	45.17	38.87	36.52	2.93	3.82	3.09	2.91	2.92	3.28	43.59	3.16
map04016	MAPK signaling pathway - plant	0.00730344	TRINITY_DN45114_c0_g1	K14498	EC:2.7.11.1	-1.68366	down	SAPK1	hypothetical protein B456_005G094500 [Gossypium raimondii]	14.43	9.87	7.79	7.94	9	6.74	39.67	41.67	32.22	40.05	34.09	37.8	9.29	37.58
map04016	MAPK signaling pathway - plant	0.00730344	TRINITY_DN56547_c1_g1	K14497	EC:3.1.3.16	-1.97274	down	SAG113	probable protein phosphatase 2C 24 [Hevea brasiliensis]	1.58	6.08	10.02	2.22	10.18	4.44	11.89	29.01	30.08	16.82	34.41	34.55	5.75	26.13
map04016	MAPK signaling pathway - plant	0.00730344	TRINITY_DN56547_c1_g2	K14497	EC:3.1.3.16	3.70512	up	SAG113	probable protein phosphatase 2C 24 [Hevea brasiliensis]	0.79	6.31	8.29	4.37	10.29	5.84	0.5	1.28	0.29	0	0.98	0.48	5.98	0.59
map04016	MAPK signaling pathway - plant	0.00730344	TRINITY_DN41189_c1_g2	K20726	-	-1.96231	down	RTE1	PREDICTED: protein REVERSION-TO-ETHYLENE SENSITIVITY1 isoform X1 [Populus euphratica]	0.23	0.13	0.31	0.04	0.36	0.12	0.71	1.85	1.17	1.27	1.09	0.98	0.2	1.18
map04016	MAPK signaling pathway - plant	0.00730344	TRINITY_DN53328_c1_g1	K14509	EC:2.7.13.-	-1.19601	down	RR41	two-component response regulator ARR22 [Populus trichocarpa]	2.81	6.88	8.89	11.37	7.01	4.53	31.3	20.98	11.13	34.96	12.97	16.6	6.91	21.32
map04016	MAPK signaling pathway - plant	0.00730344	TRINITY_DN53400_c1_g1	K20557	-	-1.49372	down	RF2b	transcription factor RF2a [Jatropha curcas]	61.83	72.62	102.17	93.92	62.76	55.07	40.24	49	376.07	145.21	454.19	343.6	74.73	234.72
map04016	MAPK signaling pathway - plant	0.00730344	TRINITY_DN52601_c2_g2	K02183	-	1.58345	up	RER4	protein RETICULATA-RELATED 4, chloroplastic [Jatropha curcas]	16.83	18.88	15.95	10.98	16.34	16.77	3.51	6.01	6.29	8.39	8.31	10.07	15.96	7.1
map04016	MAPK signaling pathway - plant	0.00730344	TRINITY_DN43133_c4_g8	K13447	EC:1.6.3.- 1.11.1.-	6.13906	up	RBOHD	respiratory burst oxidase homolog protein D [Carica papaya]	1.93	0.5	6.41	0.83	1.89	2.94	0	0	0	0.15	0	0	2.42	0.02
map04016	MAPK signaling pathway - plant	0.00730344	TRINITY_DN42736_c0_g1	K13447	EC:1.6.3.- 1.11.1.-	1.89344	up	RBOHB	respiratory burst oxidase homolog protein B [Hevea brasiliensis]	21.84	11.19	140.83	29.47	10.78	30.68	4.96	5.66	23.3	16.18	23.06	19.91	40.8	15.51
map04016	MAPK signaling pathway - plant	0.00730344	TRINITY_DN55850_c0_g2	K13447	EC:1.6.3.- 1.11.1.-	1.84003	up	RBOHB	respiratory burst oxidase homolog protein B isoform X2 [Manihot esculenta]	75.83	18.19	218.36	77.31	28.05	65.1	14.14	11.62	38.36	29.74	34.77	39.32	80.47	27.99
map04016	MAPK signaling pathway - plant	0.00730344	TRINITY_DN54847_c2_g12	K13447	EC:1.6.3.- 1.11.1.-	2.3052	up	RBOHA	respiratory burst oxidase homolog protein A [Jatropha curcas]	13.52	15.21	47.12	14.28	23.45	20.47	0.54	1.28	17.47	1.42	7.61	8.96	22.34	6.21
map04016	MAPK signaling pathway - plant	0.00730344	TRINITY_DN55865_c1_g1	K13447	EC:1.6.3.- 1.11.1.-	2.18299	up	RBOHA	LOW QUALITY PROTEIN: respiratory burst oxidase homolog protein A-like [Hevea brasiliensis]	32.6	38.1	119.72	41.87	38.54	43.55	2.02	7.17	36.1	2.28	29.48	18.74	52.4	15.96
map04016	MAPK signaling pathway - plant	0.00730344	TRINITY_DN38912_c0_g9	K14496	-	3.74671	up	PYL9	abscisic acid receptor PYL8-like [Durio zibethinus]	2.87	4.36	3.25	1.62	3.73	2.75	0.29	0.68	0.38	0.18	0.19	0	3.1	0.29
map04016	MAPK signaling pathway - plant	0.00730344	TRINITY_DN48013_c2_g2	K14496	-	-1.3329	down	PYL9	abscisic acid receptor PYL9 [Citrus clementina]	1.81	2.96	2.12	3.06	6.64	3.92	4.71	7.8	10.56	14.61	13.5	13.3	3.42	10.75
map04016	MAPK signaling pathway - plant	0.00730344	TRINITY_DN42071_c0_g3	K14496	-	3.06581	up	PYL8	Polyketide cyclase/dehydrase [Cinnamomum micranthum f. kanehirae]	12.57	24.7	11.35	6.03	14.25	12.3	0.33	1.98	2.66	4.1	1.66	1.93	13.53	2.11
map04016	MAPK signaling pathway - plant	0.00730344	TRINITY_DN40640_c1_g7	K14496	-	-1.17191	down	PYL4	PREDICTED: abscisic acid receptor PYL4-like [Populus euphratica]	0.44	1.32	0.87	1.43	1.31	1.29	4.11	1.4	2.48	6.79	0.66	4.13	1.11	3.26
map04016	MAPK signaling pathway - plant	0.00730344	TRINITY_DN48934_c1_g4	K14496	-	1.60002	up	PYL4	abscisic acid receptor PYL4-like [Hevea brasiliensis]	6.94	12	1.19	4.57	2.21	3.98	2.59	1.29	1.33	3.07	0.89	2.81	5.15	2
map04016	MAPK signaling pathway - plant	0.00730344	TRINITY_DN48934_c1_g7	K14496	-	-1.81298	down	PYL4	abscisic acid receptor PYL4-like [Hevea brasiliensis]	2.63	3.29	2.45	1.74	1.21	3.2	7.26	4.4	12.87	15.08	13.29	15.28	2.42	11.36
map04016	MAPK signaling pathway - plant	0.00730344	TRINITY_DN45155_c5_g1	K14496	-	2.45799	up	PYL2	abscisic acid receptor PYL2 [Populus trichocarpa]	3.99	7.67	8.51	20.15	9.81	6.88	0.13	0.38	1.38	4.54	5.15	2.2	9.5	2.3
map04016	MAPK signaling pathway - plant	0.00730344	TRINITY_DN44774_c0_g5	K14496	-	-1.72606	down	PYL1	abscisic acid receptor PYL1 [Hevea brasiliensis]	0.6	1.23	0.83	0.23	0.92	0.49	3.09	4.07	3.04	4.09	1.59	2.99	0.72	3.14
map04016	MAPK signaling pathway - plant	0.00730344	TRINITY_DN51432_c0_g8	K02183	-	1.22363	up	PCM3	calmodulin-like protein, partial [Capsicum annuum]	43.13	56.39	32.68	43.65	38.89	49.52	17.2	17.18	27.97	26.6	28.15	28.35	44.04	24.24
map04016	MAPK signaling pathway - plant	0.00730344	TRINITY_DN48441_c0_g2	K20714	EC:2.7.11.1	3.93369	up	OXI1	serine/threonine-protein kinase OXI1-like [Manihot esculenta]	209.53	93.26	203.32	100.73	125.2	153.05	1.29	3.39	6.46	7.18	14.24	9.07	147.52	6.94
map04016	MAPK signaling pathway - plant	0.00730344	TRINITY_DN52907_c5_g1	K20714	EC:2.7.11.1	6.62652	up	OXI1	serine/threonine-protein kinase OXI1-like [Hevea brasiliensis]	178.56	70.41	123.17	68.25	106.37	127.44	0.67	0.46	0.98	2.13	3.38	1.39	112.37	1.5
map04016	MAPK signaling pathway - plant	0.00730344	TRINITY_DN46107_c1_g1	K14497	EC:3.1.3.16	6.70922	up	Os05g0572700	probable protein phosphatase 2C 8 [Hevea brasiliensis]	19.61	24.39	64.43	54.63	85	48.75	0.17	0.39	0.72	0.66	0.92	0.87	49.47	0.62
map04016	MAPK signaling pathway - plant	0.00730344	TRINITY_DN41610_c3_g8	K14497	EC:3.1.3.16	6.32	up	Os01g0656200	PREDICTED: probable protein phosphatase 2C 51 [Populus euphratica]	7.28	11.22	30.55	21.26	39.63	20.22	0.18	0.35	0.35	0.17	0.18	0.86	21.69	0.35
map04016	MAPK signaling pathway - plant	0.00730344	TRINITY_DN49316_c0_g1	K20535	EC:2.7.11.24	-1.11199	down	NTF3	mitogen-activated protein kinase homolog NTF3-like [Gossypium hirsutum]	50.65	39.87	32.39	28.97	32.37	31.96	91.06	92.27	88.22	91.17	80.3	85.67	36.04	88.11
map04016	MAPK signaling pathway - plant	0.00730344	TRINITY_DN49550_c0_g1	K20606	EC:2.7.11.25	-1.72055	down	NPK1	mitogen-activated protein kinase kinase kinase NPK1 [Ricinus communis]	2.63	3.39	1.1	2.59	1.8	1.86	8.65	8.16	7.27	7.72	9.19	6.5	2.23	7.92
map04016	MAPK signaling pathway - plant	0.00730344	TRINITY_DN43785_c3_g4	K00940	EC:2.7.4.6	1.62365	up	Nme2	nucleoside diphosphate kinase-like [Quercus suber]	0.64	0.66	2.69	2.67	2.92	2.37	0.39	0.13	0.76	0.85	1.52	1.61	1.99	0.88
map04016	MAPK signaling pathway - plant	0.00730344	TRINITY_DN51775_c0_g3	K13422	-	-1.22006	down	NLP9	protein NLP9 [Ricinus communis]	9.83	12.95	4.29	6.8	8.22	6.64	21.1	24.03	23.71	26.71	24.93	27.02	8.12	24.58
map04016	MAPK signaling pathway - plant	0.00730344	TRINITY_DN46982_c0_g2	K13422	-	-1.31407	down	NLP7	protein NLP7 [Ricinus communis]	1.29	1.41	1.69	1.55	1.66	0.99	3.25	3.26	6.29	3.68	5.7	5.56	1.43	4.62
map04016	MAPK signaling pathway - plant	0.00730344	TRINITY_DN47963_c0_g1	K00940	EC:2.7.4.6	-2.28889	down	NDPK3	hypothetical protein CISIN_1g026399mg [Citrus sinensis]	4.07	3.15	4.16	2.27	6.2	4.09	20.01	22.33	31.38	30.05	21.44	30.23	3.99	25.91
map04016	MAPK signaling pathway - plant	0.00730344	TRINITY_DN53474_c2_g4	K02183	-	1.68732	up	MYL12B	calmodulin-1 [Vaccinium corymbosum]	0.28	0.79	2.88	2.29	2.78	3.42	0.44	0.36	0.92	0.41	1.67	1.49	2.07	0.88
map04016	MAPK signaling pathway - plant	0.00730344	TRINITY_DN46193_c3_g3	K13422	-	1.97068	up	MYC2	PREDICTED: transcription factor bHLH14 [Theobroma cacao]	5.74	1.36	2.28	1.72	0.73	4.81	0.68	1.82	0.43	0.89	0.68	1.05	2.77	0.92
map04016	MAPK signaling pathway - plant	0.00730344	TRINITY_DN52887_c2_g2	K20537	EC:2.7.11.24	2.96217	up	MPK7	mitogen-activated protein kinase 7 isoform X1 [Durio zibethinus]	50.78	85.46	54.46	92.44	52.88	52.67	8.46	11.62	12.36	10.79	9.69	12.09	64.78	10.83
map04016	MAPK signaling pathway - plant	0.00730344	TRINITY_DN39804_c2_g1	K20538	EC:2.7.11.24	-1.22229	down	MPK20	mitogen-activated protein kinase 15-like isoform X1 [Arachis hypogaea]	0.86	1.52	1.28	0.91	1.41	2.01	3.34	5.39	3.95	5.44	3.94	2.75	1.33	4.14
map04016	MAPK signaling pathway - plant	0.00730344	TRINITY_DN57045_c1_g2	K20538	EC:2.7.11.24	-1.54261	down	MPK20	mitogen-activated protein kinase 20 isoform X1 [Populus trichocarpa]	7.17	7.56	7.6	7.82	9.06	9.7	25.75	29.3	22.74	32.19	22.85	26.16	8.15	26.5
map04016	MAPK signaling pathway - plant	0.00730344	TRINITY_DN45298_c0_g1	K20538	EC:2.7.11.24	1.1317	up	MPK18	mitogen-activated protein kinase 19-like isoform X1 [Hevea brasiliensis]	45.59	69.37	30.11	54.75	45.1	47.55	36.11	37.78	22.75	30.5	19.4	21.14	48.74	27.95
map04016	MAPK signaling pathway - plant	0.00730344	TRINITY_DN47281_c0_g1	K20538	EC:2.7.11.24	1.00971	up	MPK18	mitogen-activated protein kinase 19-like isoform X1 [Hevea brasiliensis]	38.55	61.46	23.21	49.27	38.72	38.3	27.53	28.27	21.48	23.99	16.11	19.97	41.59	22.89
map04016	MAPK signaling pathway - plant	0.00730344	TRINITY_DN48912_c0_g2	K20538	EC:2.7.11.24	1.45762	up	MPK14	mitogen-activated protein kinase 12-like isoform X2 [Hevea brasiliensis]	50.15	54.99	71.04	53.23	50.32	48.63	26.48	25.71	22.5	29.68	22.4	29.49	54.73	26.04
map04016	MAPK signaling pathway - plant	0.00730344	TRINITY_DN43699_c1_g6	K20725	-	2.36526	up	MKS1	protein MKS1-like [Hevea brasiliensis]	67.91	31.61	40.32	55.39	49.47	60.23	10.14	11.8	21.93	8.19	9.73	16.69	50.82	13.08
map04016	MAPK signaling pathway - plant	0.00730344	TRINITY_DN48667_c0_g1	K20725	-	3.73988	up	MKS1	protein MKS1-like [Hevea brasiliensis]	8.64	4.8	16.38	7.32	11.93	8.66	0.09	0.14	1.32	1.36	1.09	1.82	9.62	0.97
map04016	MAPK signaling pathway - plant	0.00730344	TRINITY_DN46236_c0_g1	K20716	-	6.93772	up	mkkA	mitogen-activated protein kinase kinase kinase 18-like [Hevea brasiliensis]	50.81	11.2	205.05	42.17	43.35	70.66	0.74	0.29	1.28	1.52	0.23	0.77	70.54	0.81
map04016	MAPK signaling pathway - plant	0.00730344	TRINITY_DN45064_c0_g1	K20604	EC:2.7.12.2	-1.7897	down	MKK9	PREDICTED: mitogen-activated protein kinase kinase 9-like [Juglans regia]	22.51	16.78	7.32	10.1	24.19	35.52	69.99	71.44	43.74	145.51	95.44	92.89	19.4	86.5
map04016	MAPK signaling pathway - plant	0.00730344	TRINITY_DN36427_c0_g2	K20607	EC:2.7.12.2	-1.22452	down	MKK3	mitogen-activated protein kinase kinase 3 [Hevea brasiliensis]	5.76	3.71	4	2.75	6.07	3.16	13	17.13	14.9	12.04	11.78	9.96	4.24	13.13
map04016	MAPK signaling pathway - plant	0.00730344	TRINITY_DN56386_c0_g1	K20607	EC:2.7.12.2	-2.46702	down	MKK3	mitogen-activated protein kinase kinase 3 [Quercus suber]	2.59	8.04	9.62	0	5.77	2.63	44.17	37.93	33.03	33.58	21.8	36.46	4.77	34.49
map04016	MAPK signaling pathway - plant	0.00730344	TRINITY_DN56386_c1_g1	K20607	EC:2.7.12.2	-2.04446	down	MKK3	mitogen-activated protein kinase kinase 3 [Hevea brasiliensis]	11.07	20.2	9.1	7.09	11.52	10.62	55.81	67.4	41.07	52.23	49.59	44	11.6	51.68
map04016	MAPK signaling pathway - plant	0.00730344	TRINITY_DN56386_c1_g4	K20607	EC:2.7.12.2	-1.31278	down	MKK3	mitogen-activated protein kinase kinase 3 [Manihot esculenta]	1.96	3	1.57	1.63	1.74	1.86	6.11	5.99	4.23	7.73	6.25	7.49	1.96	6.3
map04016	MAPK signaling pathway - plant	0.00730344	TRINITY_DN48682_c5_g3	K20603	EC:2.7.12.2	1.1737	up	MKK2	mitogen-activated protein kinase kinase 2 [Populus trichocarpa]	35.15	60.44	33.04	57.44	38.05	30.25	19.51	20.1	20.54	23.41	22.33	16.47	42.4	20.39
map04016	MAPK signaling pathway - plant	0.00730344	TRINITY_DN48924_c0_g2	K13414	EC:2.7.11.25	2.93173	up	MEKK1	mitogen-activated protein kinase kinase kinase 1 [Jatropha curcas]	8.54	12.77	6.07	13.5	11.96	10.87	1.71	0.72	2.89	1.61	2.41	1.64	10.62	1.83
map04016	MAPK signaling pathway - plant	0.00730344	TRINITY_DN50546_c1_g1	K13414	EC:2.7.11.25	1.98138	up	MEKK1	mitogen-activated protein kinase kinase kinase 1 [Jatropha curcas]	71.6	95.8	77.98	89.36	75.05	76.94	10.82	13.56	35.57	14.46	35.48	27.09	81.12	22.83
map04016	MAPK signaling pathway - plant	0.00730344	TRINITY_DN45800_c0_g3	K20716	-	4.52201	up	Map3k1	mitogen-activated protein kinase kinase kinase 18-like [Manihot esculenta]	368.63	23.5	419.6	79.8	106.69	138.63	1.14	0.82	6.92	11.37	36.64	12.37	189.47	11.54
map04016	MAPK signaling pathway - plant	0.00730344	TRINITY_DN41313_c0_g3	K13414	EC:2.7.11.25	-1.6713	down	M3KE1	MAPKKKe [Nicotiana benthamiana]	1.94	2.7	1.66	1.8	1.34	1.86	4.44	4.67	4.46	4.25	3.8	3.2	1.88	4.14
map04016	MAPK signaling pathway - plant	0.00730344	TRINITY_DN52586_c2_g3	K13413	EC:2.7.12.2	-2.82188	down	LSH6	protein LIGHT-DEPENDENT SHORT HYPOCOTYLS 6-like [Abrus precatorius]	0.85	1.36	0.78	1.05	1.05	1.1	11.48	10.99	5.99	12.86	5.79	7.74	1.03	9.14
map04016	MAPK signaling pathway - plant	0.00730344	TRINITY_DN54436_c3_g1	K13413	EC:2.7.12.2	-1.7813	down	LSH4	protein LIGHT-DEPENDENT SHORT HYPOCOTYLS 4-like [Cicer arietinum]	0.59	7.51	0.33	1.77	0.09	0.18	1.21	0.77	1.43	21.91	11.11	6.97	1.74	7.23
map04016	MAPK signaling pathway - plant	0.00730344	TRINITY_DN49208_c1_g1	K17686	EC:3.6.3.54	-1.36144	down	HMA5	probable copper-transporting ATPase HMA5 [Ricinus communis]	1.16	3.5	0.99	1.05	0.93	2	4.97	6.32	4.11	2.54	3.64	3.23	1.6	4.13
map04016	MAPK signaling pathway - plant	0.00730344	TRINITY_DN49843_c1_g1	K17686	EC:3.6.3.54	-1.01423	down	HMA5	probable copper-transporting ATPase HMA5 [Cynara cardunculus var. scolymus]	14.15	37.12	6.88	9.72	15.66	30.26	40.13	45.08	37.77	45.25	50.11	47.6	18.96	44.32
map04016	MAPK signaling pathway - plant	0.00730344	TRINITY_DN37604_c0_g1	K20547	EC:3.2.1.14	4.38718	up	HEL	pathogenesis-related protein PR-4 [Populus trichocarpa]	30.39	7.15	117.46	12.88	20.21	16.99	2.04	0.83	4.84	1.53	2.17	3.9	34.18	2.55
map04016	MAPK signaling pathway - plant	0.00730344	TRINITY_DN40321_c0_g2	K14497	EC:3.1.3.16	-3.08526	down	HAB1	probable protein phosphatase 2C 53 [Hevea brasiliensis]	1.84	2.3	1.6	2.04	2.99	1.67	24.45	29.96	17.53	25.4	17.2	18.38	2.07	22.15
map04016	MAPK signaling pathway - plant	0.00730344	TRINITY_DN40929_c1_g5	K14497	EC:3.1.3.16	-2.64852	down	HAB1	PREDICTED: probable protein phosphatase 2C 53 [Populus euphratica]	3.21	5.06	3.34	3.06	4.45	2.98	34.71	45.13	24.87	27.83	24	23.92	3.68	30.08
map04016	MAPK signaling pathway - plant	0.00730344	TRINITY_DN53715_c0_g1	K14497	EC:3.1.3.16	-2.68104	down	HAB1	probable protein phosphatase 2C 50 isoform X1 [Populus trichocarpa]	1.68	3.81	2.77	2.27	2.47	2.6	22.52	31.78	9.89	25.24	13.23	17.2	2.6	19.98
map04016	MAPK signaling pathway - plant	0.00730344	TRINITY_DN53715_c0_g4	K14497	EC:3.1.3.16	-2.99031	down	HAB1	probable protein phosphatase 2C 50 isoform X1 [Populus trichocarpa]	1.2	2.39	1.07	0.74	2.88	1.39	16.03	19.89	14.86	19.74	15.03	14.46	1.61	16.67
map04016	MAPK signaling pathway - plant	0.00730344	TRINITY_DN47523_c0_g2	K13422	-	-2.9999	down	GL3	transcription factor MYC1-like [Quercus suber]	1.18	1.32	1.29	0.62	1.12	0.91	7.16	9.24	9.06	13.86	13.57	14.56	1.07	11.24
map04016	MAPK signaling pathway - plant	0.00730344	TRINITY_DN48872_c0_g2	K13422	-	-1.64861	down	GL3	transcription factor GLABRA 3-like isoform X1 [Hevea brasiliensis]	0.48	0.51	0.72	0.53	0.85	0.5	2.09	3.38	1.49	2.74	2.45	2.47	0.6	2.44
map04016	MAPK signaling pathway - plant	0.00730344	TRINITY_DN39132_c0_g1	K20558	-	7.98472	up	FAMA	HLH domain-containing protein [Cephalotus follicularis]	2.72	4.85	7.43	7.83	3.25	5.14	0	0.1	0	0	0	0	5.2	0.02
map04016	MAPK signaling pathway - plant	0.00730344	TRINITY_DN53416_c1_g2	K00940	EC:2.7.4.6	-2.11686	down	fam135b	protein FAM135B-like isoform X2 [Hevea brasiliensis]	1.57	2.11	1.39	1.47	1.41	1.12	7.65	9.6	8.66	11.41	9.5	10.45	1.51	9.54
map04016	MAPK signaling pathway - plant	0.00730344	TRINITY_DN53083_c0_g1	K14509	EC:2.7.13.-	-1.14558	down	ETR2	ethylene receptor isoform X1 [Populus trichocarpa]	20.67	23.96	22.28	17.07	23.25	17.5	58	62.73	56.72	66.31	52.57	57.18	20.79	58.92
map04016	MAPK signaling pathway - plant	0.00730344	TRINITY_DN54761_c1_g1	K14509	EC:2.7.13.-	2.08621	up	ETR2	ethylene receptor 2-like [Hevea brasiliensis]	37.64	42.43	20.09	29.94	32.48	31.17	3.86	5.72	9.82	10.02	13.01	16.79	32.29	9.87
map04016	MAPK signaling pathway - plant	0.00730344	TRINITY_DN46082_c0_g1	K14509	EC:2.7.13.-	-1.64102	down	ETR1	putative ethylene receptor [Pyrus communis]	5.64	10.91	3.75	5.07	8.25	8.91	27.23	28.33	21.08	30.29	26.04	22.5	7.09	25.91
map04016	MAPK signaling pathway - plant	0.00730344	TRINITY_DN48169_c1_g3	K14509	EC:2.7.13.-	-1.36691	down	ETR1	PREDICTED: ethylene receptor 1-like [Camelina sativa]	4.24	3.77	4.95	4.47	5.65	4.61	15.74	14.89	17.75	16.61	14.28	15.11	4.61	15.73
map04016	MAPK signaling pathway - plant	0.00730344	TRINITY_DN52463_c0_g1	K14509	EC:2.7.13.-	-1.28456	down	ETR1	hypothetical protein CICLE_v10019003mg [Citrus clementina]	19.08	21.95	22.29	15.98	20.72	16.75	59.55	56.69	59.73	60.38	51.48	63.74	19.46	58.59
map04016	MAPK signaling pathway - plant	0.00730344	TRINITY_DN51189_c0_g1	K14509	EC:2.7.13.-	1.66333	up	ERS1	ethylene response sensor 1-like isoform X2 [Hevea brasiliensis]	3.56	3.17	3.79	4.14	1.38	3.1	1.12	1.92	1.18	0.9	1.23	0.74	3.19	1.18
map04016	MAPK signaling pathway - plant	0.00730344	TRINITY_DN41047_c2_g2	K14516	-	4.52901	up	ERF1B	ethylene-responsive transcription factor 1B-like [Hevea brasiliensis]	60.4	5.94	54.93	40.17	39.99	86.6	6.19	4.8	1.66	2.47	0.55	1.08	48	2.79
map04016	MAPK signaling pathway - plant	0.00730344	TRINITY_DN46686_c2_g6	K14516	-	6.87414	up	ERF1B	Ethylene-responsive transcription factor 1B, putative, partial [Ricinus communis]	16.21	3.29	15.37	5.98	4.96	15.48	0	0	0.3	0.06	0.3	0	10.21	0.11
map04016	MAPK signaling pathway - plant	0.00730344	TRINITY_DN46706_c1_g3	K14516	-	9.88884	up	ERF1B	PREDICTED: ethylene-responsive transcription factor 1B-like [Populus euphratica]	147.95	29.25	51.59	87.32	34.24	143.17	0	0	0	0.24	0	0.25	82.25	0.08
map04016	MAPK signaling pathway - plant	0.00730344	TRINITY_DN46706_c1_g8	K14516	-	4.69774	up	ERF1B	ethylene-responsive transcription factor 1B-like [Manihot esculenta]	90.17	3.96	69.82	55.38	41.98	117.08	6.56	5.32	0	6.54	0.38	1.11	63.06	3.32
map04016	MAPK signaling pathway - plant	0.00730344	TRINITY_DN47060_c0_g10	K14516	-	4.45674	up	ERF1B	Ethylene-responsive transcription factor 1B [Vitis vinifera]	124.12	28.03	91.14	44.36	36.33	93.24	0.99	0.58	4.19	8.59	9.24	7.86	69.54	5.24
map04016	MAPK signaling pathway - plant	0.00730344	TRINITY_DN47292_c0_g4	K14516	-	8.90237	up	ERF1B	ethylene-responsive transcription factor 1B [Populus trichocarpa]	10.42	5.14	3.45	4.03	4.61	12.81	0	0	0	0	0	0.06	6.74	0.01
map04016	MAPK signaling pathway - plant	0.00730344	TRINITY_DN48297_c2_g4	K14516	-	3.03913	up	ERF1B	ethylene-responsive transcription factor 1B [Populus trichocarpa]	20.09	9.7	14.62	10.65	7.4	14.21	1.31	2.53	2.69	2.01	1.22	2.46	12.78	2.04
map04016	MAPK signaling pathway - plant	0.00730344	TRINITY_DN53785_c0_g4	K14516	-	9.07829	up	ERF1B	PREDICTED: ethylene-responsive transcription factor 1B [Theobroma cacao]	31.75	8.85	32.68	4.63	6.08	18.06	0	0	0	0.09	0.09	0	17.01	0.03
map04016	MAPK signaling pathway - plant	0.00730344	TRINITY_DN56480_c2_g2	K14516	-	8.08303	up	ERF1B	ethylene-responsive transcription factor 1B-like [Hevea brasiliensis]	68.72	20.4	31.98	44.55	18.52	94.91	0	0.73	0	0.52	0	0	46.51	0.21
map04016	MAPK signaling pathway - plant	0.00730344	TRINITY_DN38803_c0_g5	K14516	-	9.53019	up	ERF095	PREDICTED: ethylene-responsive transcription factor ERF096-like [Populus euphratica]	43.8	27.03	51.45	37.37	22.88	53.08	0.03	0.19	0.08	0.05	0.03	0.03	39.27	0.07
map04016	MAPK signaling pathway - plant	0.00730344	TRINITY_DN40706_c0_g12	K14516	-	8.09008	up	ERF095	PREDICTED: ethylene-responsive transcription factor ERF095 [Vitis vinifera]	9.43	0.91	9.64	1.65	2.62	2.8	0	0	0	0	0.07	0	4.51	0.01
map04016	MAPK signaling pathway - plant	0.00730344	TRINITY_DN43530_c0_g2	K20718	EC:2.7.11.1	-1.62353	down	ERECTA	LRR receptor-like serine/threonine-protein kinase ERECTA [Manihot esculenta]	47.68	34.63	59.65	57.56	56.13	41.66	175.61	172.78	126.11	144.01	136.95	103.53	49.55	143.16
map04016	MAPK signaling pathway - plant	0.00730344	TRINITY_DN54945_c5_g1	K20718	EC:2.7.11.1	-1.01744	down	ERECTA	LRR receptor-like serine/threonine-protein kinase ERECTA [Manihot esculenta]	30.28	24.71	40.12	33.54	39.31	30.09	106.28	106.6	82.28	91.1	86.99	73.31	33.01	91.09
map04016	MAPK signaling pathway - plant	0.00730344	TRINITY_DN54945_c5_g5	K20718	EC:2.7.11.1	-1.04321	down	ERECTA	unnamed protein product, partial [Vitis vinifera]	31.29	24.64	43.63	39.16	34.03	28.94	113.42	119.8	81.27	83.48	97.75	65.28	33.62	93.5
map04016	MAPK signaling pathway - plant	0.00730344	TRINITY_DN56858_c1_g4	K20718	EC:2.7.11.1	-1.03288	down	ERECTA	LRR receptor-like serine/threonine-protein kinase ERECTA isoform X1 [Prunus persica]	35.03	30.96	39.12	41.88	45.46	28.58	111.52	119.26	103.99	86.13	103.43	72.58	36.84	99.48
map04016	MAPK signaling pathway - plant	0.00730344	TRINITY_DN51420_c1_g1	K14509	EC:2.7.13.-	1.21659	up	EIN4	protein EIN4 [Ricinus communis]	29.67	39.94	19.48	32.77	20.21	23.09	17.71	19.03	10.62	15.81	8.56	10.59	27.53	13.72
map04016	MAPK signaling pathway - plant	0.00730344	TRINITY_DN53606_c0_g3	K14514	-	1.19201	up	EIN3	protein ETHYLENE INSENSITIVE 3 [Ricinus communis]	169.59	201.87	119.9	195.98	141.28	184.02	81.13	91.82	100.08	106.61	93.36	97.76	168.77	95.13
map04016	MAPK signaling pathway - plant	0.00730344	TRINITY_DN54103_c3_g1	K14514	-	1.06001	up	EIN3	protein ETHYLENE INSENSITIVE 3-like [Hevea brasiliensis]	204.25	238.54	119.32	228.96	152.78	185.4	107.29	111.73	120.21	130.55	100.7	122.74	188.21	115.54
map04016	MAPK signaling pathway - plant	0.00730344	TRINITY_DN36433_c0_g1	K14513	-	-1.77676	down	EIN2	hypothetical protein POPTR_016G090800 [Populus trichocarpa]	9.09	12.76	14.69	7.03	9.74	8.38	61.12	60.77	33.17	31.63	34.58	56.98	10.28	46.38
map04016	MAPK signaling pathway - plant	0.00730344	TRINITY_DN39594_c0_g1	K14513	-	-1.94679	down	EIN2	PREDICTED: ethylene-insensitive protein 2-like [Populus euphratica]	10.81	5.89	14.33	4.94	5.73	5.31	57.13	49.8	31.95	34.01	26.25	48.1	7.84	41.21
map04016	MAPK signaling pathway - plant	0.00730344	TRINITY_DN39657_c2_g7	K14513	-	-1.30814	down	EIN2	PREDICTED: ethylene-insensitive protein 2-like [Populus euphratica]	5.05	4.46	5.8	2.95	5.93	3.99	20.34	19.6	11.43	13.12	11.14	14.89	4.7	15.09
map04016	MAPK signaling pathway - plant	0.00730344	TRINITY_DN39954_c1_g2	K14513	-	-1.77601	down	EIN2	ethylene-insensitive protein 2-like [Hevea brasiliensis]	1.62	2	1.64	1.03	1.11	1.8	5.98	9.12	4.4	6.14	5.3	6.09	1.53	6.17
map04016	MAPK signaling pathway - plant	0.00730344	TRINITY_DN39954_c1_g6	K14513	-	-3.61952	down	EIN2	ethylene-insensitive protein 2-like [Hevea brasiliensis]	0.59	0.43	1.17	0.67	0.42	0.5	15.73	12.88	5.56	9.12	6.38	11.19	0.63	10.14
map04016	MAPK signaling pathway - plant	0.00730344	TRINITY_DN56965_c1_g2	K14513	-	-1.93464	down	EIN2	ethylene-insensitive protein 2-like [Hevea brasiliensis]	5.98	4.12	5.87	3.42	4.87	4.53	29.9	35.3	14.95	19.92	14.54	32.59	4.8	24.53
map04016	MAPK signaling pathway - plant	0.00730344	TRINITY_DN56965_c2_g1	K14513	-	-1.73206	down	EIN2	ethylene-insensitive protein 2-like [Hevea brasiliensis]	15.69	15.91	12.98	10.16	12.3	12.59	55.41	66.26	40.6	47.9	40.5	60.72	13.27	51.9
map04016	MAPK signaling pathway - plant	0.00730344	TRINITY_DN56965_c2_g2	K14513	-	-1.39407	down	EIN2	hypothetical protein POPTR_016G090800 [Populus trichocarpa]	34.22	32.51	32.11	21.77	27.59	26.94	135.03	145.17	83.84	98	86.87	131.09	29.19	113.33
map04016	MAPK signaling pathway - plant	0.00730344	TRINITY_DN56965_c2_g4	K14513	-	-1.0615	down	EIN2	hypothetical protein POPTR_016G090800 [Populus trichocarpa]	9.94	9.22	9.23	7.62	8.38	8.57	20.25	31.93	19.51	23.78	27.12	21.6	8.83	24.03
map04016	MAPK signaling pathway - plant	0.00730344	TRINITY_DN56965_c2_g5	K14513	-	-1.84518	down	EIN2	ethylene-insensitive protein 2 isoform X1 [Ricinus communis]	5.48	3.78	8.26	4.1	3.58	5.47	32.09	34.64	15.71	19.55	17.63	27.66	5.11	24.55
map04016	MAPK signaling pathway - plant	0.00730344	TRINITY_DN37178_c0_g1	K14514	-	2.76647	up	EIL3	EIN3 domain-containing protein [Cephalotus follicularis]	20.63	20.2	18.72	18.28	14.03	15.34	2.83	2.85	3.72	4.44	3.71	2.8	17.87	3.39
map04016	MAPK signaling pathway - plant	0.00730344	TRINITY_DN57022_c1_g1	K14514	-	1.93709	up	EIL3	PREDICTED: ETHYLENE INSENSITIVE 3-like 3 protein [Populus euphratica]	41.84	36.97	25.45	29.01	27.09	27.45	11.39	13.01	10.59	13.49	10.26	12.42	31.3	11.86
map04016	MAPK signaling pathway - plant	0.00730344	TRINITY_DN48190_c3_g1	K02183	-	1.13561	up	dfr1	dihydrofolate reductase [Hevea brasiliensis]	13.96	10.21	15.05	12.07	8.26	10.28	5.51	7.25	6.03	8.38	10.44	8.05	11.64	7.61
map04016	MAPK signaling pathway - plant	0.00730344	TRINITY_DN53874_c0_g2	K14510	EC:2.7.11.1	-1.67118	down	CTR1	serine/threonine-protein kinase CTR1 [Jatropha curcas]	2.25	2.04	2.26	1.02	2.16	1.89	10.94	13.21	5.48	8.22	3.84	5.96	1.94	7.94
map04016	MAPK signaling pathway - plant	0.00730344	TRINITY_DN53982_c1_g1	K14510	EC:2.7.11.1	2.3225	up	CTR1	serine/threonine-protein kinase CTR1 [Populus trichocarpa]	4.75	4.29	3.7	2.71	4.7	6.88	1.54	1.44	0.84	0.8	0.58	2.25	4.5	1.24
map04016	MAPK signaling pathway - plant	0.00730344	TRINITY_DN47651_c3_g3	K20547	EC:3.2.1.14	2.50769	up	CTL1	chitinase-like protein 1 [Sesamum indicum]	0.68	0.39	0.81	0.95	0.94	1.16	0	0.35	0.08	0.11	0.2	0.39	0.82	0.19
map04016	MAPK signaling pathway - plant	0.00730344	TRINITY_DN45872_c0_g2	K02183	-	1.95647	up	CML45	probable calcium-binding protein CML45 [Ricinus communis]	0.93	0.58	2.72	0.52	4.5	4.44	0.86	0.3	0.46	0.8	1.48	0.81	2.28	0.79
map04016	MAPK signaling pathway - plant	0.00730344	TRINITY_DN51062_c1_g1	K02183	-	2.8294	up	CML45	probable calcium-binding protein CML45 [Jatropha curcas]	536.37	79.93	311.4	154.02	287.9	318.86	1.57	2.19	8.81	115	113.58	82.78	281.41	53.99
map04016	MAPK signaling pathway - plant	0.00730344	TRINITY_DN51062_c1_g6	K02183	-	2.47672	up	CML45	probable calcium-binding protein CML45 [Jatropha curcas]	30.62	11.83	16.3	6.7	16.93	23.9	1.22	1.23	2.45	7.02	7.12	6.34	17.71	4.23
map04016	MAPK signaling pathway - plant	0.00730344	TRINITY_DN49657_c2_g4	K13420	EC:2.7.11.1	-2.16395	down	CLV2	receptor-like protein CLAVATA2 [Populus trichocarpa]	0.98	1.26	1.87	0.93	1.52	0.87	6.47	6.97	5.99	9.45	7.07	7.31	1.24	7.21
map04016	MAPK signaling pathway - plant	0.00730344	TRINITY_DN38937_c0_g1	K20547	EC:3.2.1.14	8.37332	up	Cht10	chitinase 10 [Ricinus communis]	6.51	0.13	17.61	2.23	1.63	4.61	0.07	0	0	0	0	0	5.45	0.01
map04016	MAPK signaling pathway - plant	0.00730344	TRINITY_DN38937_c0_g2	K20547	EC:3.2.1.14	4.09826	up	Cht10	chitinase 10 [Ricinus communis]	3.4	0.83	14.29	2.07	1.75	2.74	0.07	0	0.66	0.32	0.13	0.84	4.18	0.34
map04016	MAPK signaling pathway - plant	0.00730344	TRINITY_DN44621_c3_g1	K20547	EC:3.2.1.14	1.58872	up	CHI2	endochitinase-like [Manihot esculenta]	48.3	25.33	22.68	16.82	31.18	30.43	4.11	5.61	13.89	11.66	30.05	22.02	29.12	14.56
map04016	MAPK signaling pathway - plant	0.00730344	TRINITY_DN56674_c0_g1	K02183	-	-1.03786	down	CG5412	esterase C25G4.2-like [Manihot esculenta]	3.32	2.95	0.68	1.15	3.02	4.24	4.02	6.31	8.46	7.61	6.57	9.01	2.56	7
map04016	MAPK signaling pathway - plant	0.00730344	TRINITY_DN42835_c2_g2	K03781	EC:1.11.1.6	-1.07541	down	CAT1	PREDICTED: catalase isozyme 1 [Gossypium raimondii]	2157.24	1533.25	1013.07	1396.5	645.44	1073.14	4701.55	3321.66	3570.4	2707.5	4034.31	2484.83	1303.11	3470.04
map04016	MAPK signaling pathway - plant	0.00730344	TRINITY_DN53512_c1_g5	K03781	EC:1.11.1.6	1.55443	up	CAT1	catalase isozyme 3 isoform X3 [Sesamum indicum]	1.68	1.01	1.19	0.65	1.08	0.7	0.78	1.61	0.35	3.39	1.03	0.88	1.05	1.34
map04016	MAPK signaling pathway - plant	0.00730344	TRINITY_DN53846_c0_g1	K03781	EC:1.11.1.6	-1.04383	down	CAT1	catalase isozyme 1 isoform X1 [Citrus clementina]	83.42	144.82	94.49	123.29	133.79	114.36	469.33	381.88	223.96	242.01	242.5	249.62	115.7	301.55
map04016	MAPK signaling pathway - plant	0.00730344	TRINITY_DN53846_c0_g4	K03781	EC:1.11.1.6	-1.13717	down	CAT1	hypothetical protein COLO4_22543 [Corchorus olitorius]	2315.76	1677.32	1108.46	1366.24	674.66	1215.57	5296.62	3799.56	4059.88	3058.84	4451.37	2765.58	1393	3905.31
map04016	MAPK signaling pathway - plant	0.00730344	TRINITY_DN44261_c1_g5	K02183	-	1.39806	up	CAM2	PREDICTED: calmodulin-7 [Capsicum annuum]	0.22	0.41	0.46	0.36	0.48	0.47	0.18	0.09	0.11	0.06	0.22	0.51	0.4	0.19
map04016	MAPK signaling pathway - plant	0.00730344	TRINITY_DN48060_c0_g6	K02183	-	2.09706	up	CAM2	CaM-1, partial [Nicotiana plumbaginifolia]	51.37	72.71	43.24	58.97	58.04	70.67	17	24.76	23.15	25.71	28.24	24.99	59.17	23.97
map04016	MAPK signaling pathway - plant	0.00730344	TRINITY_DN44261_c1_g1	K02183	-	1.11168	up	CAM-1	unnamed protein product [Brassica rapa]	381.2	515.39	278.93	484.76	361.24	410.01	184.1	191.83	254.86	269.73	326.88	289.21	405.25	252.77
map04016	MAPK signaling pathway - plant	0.00730344	TRINITY_DN47387_c0_g1	K02183	-	1.84973	up	CAM-1	putative EF-hand domain pair protein [Medicago truncatula]	68.9	98.18	57.76	93.7	72.27	90.36	22.19	19.75	29.77	34.42	36.23	36.27	80.2	29.77
map04016	MAPK signaling pathway - plant	0.00730344	TRINITY_DN47387_c0_g4	K02183	-	8.38121	up	Calml3	RecName: Full=Calmodulin; Short=CaM	0	0	3.06	3.16	2.55	3.14	0	0	0	0	0	0	1.99	0
map04016	MAPK signaling pathway - plant	0.00730344	TRINITY_DN44261_c1_g7	K02183	-	4.47851	up	CALM	unknown [Zea mays]	0	0.24	1.9	2.48	2.4	2	0	0	0.05	0.09	0.23	0.14	1.5	0.09
map04016	MAPK signaling pathway - plant	0.00730344	TRINITY_DN50520_c1_g5	K02183	-	1.55417	up	CALM	unknown [Zea mays]	1.09	0.81	1.18	1.77	1.62	1.52	0.92	1.31	1.45	1.44	0.95	1.08	1.33	1.19
map04016	MAPK signaling pathway - plant	0.00730344	TRINITY_DN38876_c0_g1	K13422	-	-3.21011	down	BHLH93	Beta HLH protein 93 [Theobroma cacao]	0.12	0.16	0.08	0.04	0.04	0.04	0.55	0.23	0.53	2.94	0.8	0.82	0.08	0.98
map04016	MAPK signaling pathway - plant	0.00730344	TRINITY_DN45976_c1_g5	K13422	-	3.77504	up	BHLH30	transcription factor bHLH30-like [Hevea brasiliensis]	31.74	56.55	16.05	41.86	74.12	48.71	4.47	4.87	5.3	4.25	3.56	6.86	44.84	4.88
map04016	MAPK signaling pathway - plant	0.00730344	TRINITY_DN46555_c0_g1	K13422	-	2.74502	up	BHLH25	transcription factor bHLH25 [Ricinus communis]	1.1	1.45	2.19	0.74	2.09	1.19	0.23	0.3	0.15	0.56	0.22	0.36	1.46	0.3
map04016	MAPK signaling pathway - plant	0.00730344	TRINITY_DN55003_c1_g2	K13422	-	-2.75637	down	BHLH2	transcription factor MYC1-like [Quercus suber]	1.72	2.15	1.22	1.73	3.79	1.14	14.21	12.03	10.21	12.8	10.56	11.53	1.96	11.89
map04016	MAPK signaling pathway - plant	0.00730344	TRINITY_DN44178_c0_g1	K13422	-	-1.19759	down	BHLH13	bHLH1 protein [Tectona grandis]	2.08	3.91	0.67	2.63	2.73	2.38	8.12	8.57	6.55	8.07	5.01	5.61	2.4	6.99
map04016	MAPK signaling pathway - plant	0.00730344	TRINITY_DN54585_c2_g1	K13422	-	-1.04568	down	BHLH13	transcription factor bHLH13-like [Hevea brasiliensis]	17.09	16.5	12.09	12.72	14.68	16.37	8.3	9.39	40.17	36.73	64.85	47.13	14.91	34.43
map04016	MAPK signaling pathway - plant	0.00730344	TRINITY_DN44622_c0_g1	K13416	EC:2.7.10.1 2.7.11.1	-1.86794	down	BAK1	PREDICTED: LRR receptor-like serine/threonine-protein kinase GSO2 [Populus euphratica]	2.43	3.27	0.72	1.75	3.55	1.77	11.54	10.41	7.44	11.17	10.14	10.95	2.25	10.28
map04016	MAPK signaling pathway - plant	0.00730344	TRINITY_DN44811_c2_g2	K13416	EC:2.7.10.1 2.7.11.1	1.19765	up	BAK1	BRASSINOSTEROID INSENSITIVE 1-associated receptor kinase 1-like [Hevea brasiliensis]	46.83	48.1	50.74	42.22	47.65	39.48	20.38	21.97	45.42	21.14	26.45	25.69	45.84	26.84
map04016	MAPK signaling pathway - plant	0.00730344	TRINITY_DN48217_c1_g4	K13416	EC:2.7.10.1 2.7.11.1	1.27814	up	BAK1	PREDICTED: somatic embryogenesis receptor kinase 2-like [Erythranthe guttata]	0.46	0.63	0.65	1.12	1.16	1	0.24	0.33	0.17	0.36	0.5	0.99	0.84	0.43
map04016	MAPK signaling pathway - plant	0.00730344	TRINITY_DN44565_c1_g8	K14497	EC:3.1.3.16	3.7305	up	At2g29380	Highly ABA-induced PP2C gene 2 isoform 1 [Theobroma cacao]	0.83	8.76	12.67	5.45	16	9.6	0.42	1.23	0	0.39	0	3.21	8.88	0.88
map04016	MAPK signaling pathway - plant	0.00730344	TRINITY_DN54804_c0_g1	K20718	EC:2.7.11.1	2.20158	up	At1g12460	probable LRR receptor-like serine/threonine-protein kinase At1g12460 [Populus trichocarpa]	21.19	8.76	17.11	13.08	13.29	8.27	0.7	1.07	2.84	3.87	6.69	6.26	13.62	3.57
map04016	MAPK signaling pathway - plant	0.00730344	TRINITY_DN46337_c1_g1	K20728	-	-2.46462	down	APS1	uncharacterized protein LOC112008917 [Quercus suber]	0.73	1.48	1.08	1.74	1.54	0.63	3.96	5.39	12.95	10.58	7.66	13.38	1.2	8.99
map04016	MAPK signaling pathway - plant	0.00730344	TRINITY_DN50549_c2_g3	K20716	-	2.40395	up	ANP3	hypothetical protein MANES_06G031800 [Manihot esculenta]	16.44	16.66	34.66	26	18.41	31.06	4.83	4.56	8.98	5.64	4.94	6.56	23.87	5.92
map04016	MAPK signaling pathway - plant	0.00730344	TRINITY_DN48707_c0_g5	K20716	-	-1.69469	down	ANP2	PREDICTED: mitogen-activated protein kinase kinase kinase YODA-like [Populus euphratica]	0.37	0.49	0.57	0.66	0.76	0.46	0.51	0.44	2.02	5.11	3.79	2.38	0.55	2.38
map04016	MAPK signaling pathway - plant	0.00730344	TRINITY_DN41678_c1_g5	K20606	EC:2.7.11.25	-1.18577	down	ANP1	mitogen-activated protein kinase kinase kinase ANP1-like isoform X2 [Manihot esculenta]	1.07	1.53	0.69	2.05	0.99	0.88	4.57	5.75	6.5	3.58	7.02	3.35	1.2	5.13
map04016	MAPK signaling pathway - plant	0.00730344	TRINITY_DN47234_c1_g2	K14497	EC:3.1.3.16	4.11048	up	AIP1	probable protein phosphatase 2C 24 [Hevea brasiliensis]	1.56	9.41	11.53	8.34	18.64	8.47	0.1	2.05	0.42	0.09	0.79	0.87	9.66	0.72
map04016	MAPK signaling pathway - plant	0.00730344	TRINITY_DN54585_c2_g4	K13422	-	1.02244	up	AIB	transcription factor bHLH13 [Hevea brasiliensis]	13.88	10.51	7.34	9.78	8.91	10.6	2.25	4.05	4.83	7.33	11.33	9.52	10.17	6.55
map04016	MAPK signaling pathway - plant	0.00730344	TRINITY_DN41871_c0_g3	K14497	EC:3.1.3.16	5.26904	up	AHG1	probable protein phosphatase 2C 75 isoform X1 [Jatropha curcas]	7.63	15.98	13.03	20.57	22.84	9.66	0.38	0.61	0.67	0.89	0.39	0.33	14.95	0.55
map04016	MAPK signaling pathway - plant	0.00730344	TRINITY_DN46107_c1_g7	K14497	EC:3.1.3.16	3.6812	up	AHG1	probable protein phosphatase 2C 75 isoform X1 [Quercus suber]	3.54	13.54	12.9	21.25	24.01	13.22	1.92	1.35	1.36	2.07	2.18	0.26	14.74	1.52
map04016	MAPK signaling pathway - plant	0.00730344	TRINITY_DN44751_c0_g1	K20772	EC:4.4.1.14	6.73664	up	ACS1	1-aminocyclopropane-1-carboxylate synthase-like [Manihot esculenta]	16.17	0.31	12.45	0.97	2.65	13.22	0.08	0	0.08	0.16	0.14	0.16	7.63	0.1
map04016	MAPK signaling pathway - plant	0.00730344	TRINITY_DN50142_c0_g8	K20772	EC:4.4.1.14	7.28847	up	ACS1	1-aminocyclopropane-1-carboxylate synthase [Populus x canadensis]	0.61	0.18	6.23	0.33	0.54	0.88	0	0	0	0.04	0	0	1.46	0.01
map04016	MAPK signaling pathway - plant	0.00730344	TRINITY_DN53715_c0_g3	K14497	EC:3.1.3.16	-3.20572	down	ABI1	probable protein phosphatase 2C 50 [Ricinus communis]	4.3	9.03	1.2	3.13	8.13	6.9	42.9	54.25	32.38	46.14	42.46	37.66	5.45	42.63
map04016	MAPK signaling pathway - plant	0.00730344	TRINITY_DN37178_c0_g2	K14514	-	1.55836	up	-	LOW QUALITY PROTEIN: ETHYLENE INSENSITIVE 3-like 3 protein [Ziziphus jujuba]	10.24	10.42	3.88	6.19	7.68	9.15	4.23	3.66	2.01	4.48	3.17	2.98	7.93	3.42
map04016	MAPK signaling pathway - plant	0.00730344	TRINITY_DN38264_c0_g1	K13449	-	2.60667	up	-	pathogenesis-related protein 1-like [Hevea brasiliensis]	1703.62	368.76	1524.18	145.18	346.57	814.94	36.43	39.9	691.81	23.09	59.83	268.15	817.21	186.53
map04016	MAPK signaling pathway - plant	0.00730344	TRINITY_DN39779_c0_g1	K13424	-	2.52922	up	-	probable WRKY transcription factor 33 [Populus trichocarpa]	13.7	5.15	19.64	5.22	4.5	7.14	0	0	6.9	0.59	1.25	4.21	9.22	2.16
map04016	MAPK signaling pathway - plant	0.00730344	TRINITY_DN40571_c0_g4	K13449	-	8.46682	up	-	pathogenesis-related protein PR-1-like [Hevea brasiliensis]	5.58	1.05	9.73	4.39	3.37	3.22	0	0	0	0	0	0	4.56	0
map04016	MAPK signaling pathway - plant	0.00730344	TRINITY_DN41472_c3_g4	K03781	EC:1.11.1.6	1.91564	up	-	truncated catalase 2 [Avicennia marina]	3.89	5.03	11.99	11.27	8.31	9.35	4.93	2.88	0.25	0.11	3.96	4.92	8.31	2.84
map04016	MAPK signaling pathway - plant	0.00730344	TRINITY_DN43663_c1_g2	K20547	EC:3.2.1.14	1.10481	up	-	endochitinase 2 [Populus trichocarpa]	47.68	19.25	22	13.2	28.46	28.73	5.1	8.88	14.68	11.86	34.94	24.97	26.55	16.74
map04016	MAPK signaling pathway - plant	0.00730344	TRINITY_DN44229_c2_g5	K13420	EC:2.7.11.1	2.17872	up	-	PREDICTED: probable LRR receptor-like serine/threonine-protein kinase At1g34110 [Populus euphratica]	1.62	1.38	6.34	1.95	2.21	1.36	0.58	0.31	1.48	0.68	0.68	0.66	2.48	0.73
map04016	MAPK signaling pathway - plant	0.00730344	TRINITY_DN44621_c3_g3	K20547	EC:3.2.1.14	6.80436	up	-	endochitinase, partial [Ricinus communis]	68.18	23.54	89.44	31.73	45.49	32.62	0.49	0.22	0.67	1.05	0.4	0.61	48.5	0.57
map04016	MAPK signaling pathway - plant	0.00730344	TRINITY_DN45333_c0_g7	K13424	-	5.65205	up	-	WRKY transcription factor WRKY24 isoform X2 [Jatropha curcas]	149.05	128.5	66.08	163.28	90.86	105.21	0.88	2.84	2	3.01	6	3.89	117.16	3.1
map04016	MAPK signaling pathway - plant	0.00730344	TRINITY_DN46356_c0_g1	K20547	EC:3.2.1.14	4.98917	up	-	acidic chitinase [Elaeagnus umbellata]	15.49	0	17.11	5.39	5.37	10.59	0	0.83	0.82	0	0	0	8.99	0.27
map04016	MAPK signaling pathway - plant	0.00730344	TRINITY_DN48190_c3_g2	K02183	-	4.37719	up	-	dihydrofolate reductase [Hevea brasiliensis]	3.81	1.31	4.92	1.71	0.47	2.08	0.13	0.04	0.12	0.08	0.24	0.31	2.38	0.15
map04016	MAPK signaling pathway - plant	0.00730344	TRINITY_DN48754_c6_g7	K13420	EC:2.7.11.1	2.1378	up	-	PREDICTED: probably inactive leucine-rich repeat receptor-like protein kinase At2g25790 [Gossypium raimondii]	94.09	40.41	145.19	59.59	97.04	55.54	1.25	0.6	23.48	35.41	53.01	37.19	81.98	25.16
map04016	MAPK signaling pathway - plant	0.00730344	TRINITY_DN50146_c1_g1	K14496	-	-1.97686	down	-	abscisic acid receptor PYL4-like [Hevea brasiliensis]	5.66	7.25	4.94	2.7	2.34	3.4	16.48	15.25	35.09	26.62	17.7	28.18	4.38	23.22
map04016	MAPK signaling pathway - plant	0.00730344	TRINITY_DN53730_c0_g2	K13424	-	3.55147	up	-	WRKY transcription factor WRKY24-like isoform X2 [Abrus precatorius]	595.27	319.61	386.65	342.81	384.53	456.98	5.66	3.17	50.25	64.04	83.81	77.26	414.31	47.37
map04016	MAPK signaling pathway - plant	0.00730344	TRINITY_DN54078_c1_g6	K14497	EC:3.1.3.16	-1.66926	down	-	putative disease resistance protein RGA4 [Vitis vinifera]	4.74	6.92	13.01	5.21	12.81	11.34	8.3	10.54	53.48	53.03	45.68	66.73	9.01	39.63
map04016	MAPK signaling pathway - plant	0.00730344	TRINITY_DN54221_c2_g1	K02183	-	5.88215	up	-	Calmodulin-like 11, putative [Theobroma cacao]	93.49	15.65	74.03	13.87	21.45	27.97	0.32	0.39	1.78	0.6	1.79	1.37	41.08	1.04
map04016	MAPK signaling pathway - plant	0.00730344	TRINITY_DN56858_c1_g1	K20718	EC:2.7.11.1	-1.11838	down	-	LRR receptor-like serine/threonine-protein kinase ERL1 [Helianthus annuus]	30.69	25.66	30.74	30.86	37.12	22.13	96.17	90.8	80.59	76.85	76.67	59.26	29.53	80.06
map04016	MAPK signaling pathway - plant	0.00730344	TRINITY_DN57022_c1_g2	K14514	-	2.90589	up	-	ETHYLENE INSENSITIVE 3-like 3 protein [Quercus suber]	46.75	54.09	42.19	42.84	36.84	24.25	4.82	7.6	8.61	8.18	8.29	6.49	41.16	7.33

## Sheet: A.marina
PathwayEntry	PathwayDefinition	pvalue	Gene_ID	KOEntry	EC	log2FC	regulation	Name	Annotation	Am_CS_1_TPM	Am_CS_2_TPM	Am_CS_3_TPM	Am_CS_4_TPM	Am_CS_5_TPM	Am_CS_6_TPM	Am_CK_1_TPM	Am_CK_2_TPM	Am_CK_3_TPM	Am_CK_4_TPM	Am_CK_5_TPM	Am_CK_6_TPM	Am_CS_mean_TPM	Am_CK_mean_TPM
map04016	MAPK signaling pathway - plant	1.7368e-07	TRINITY_DN43479_c1_g2	K20716	-	5.36075	up	YDA	mitogen-activated protein kinase kinase kinase NPK1 [Sesamum indicum]	11.34	22.27	15.12	9.25	19.9	9.14	1.5	0.69	0.34	0.34	0	1.07	14.5	0.66
map04016	MAPK signaling pathway - plant	1.7368e-07	TRINITY_DN50568_c0_g16	K20716	-	7.99556	up	YDA	MEKK [Handroanthus impetiginosus]	4.77	18.27	11.06	8.51	44.53	46.14	0.19	0.07	0.21	0.09	0.17	0.17	22.21	0.15
map04016	MAPK signaling pathway - plant	1.7368e-07	TRINITY_DN52378_c2_g7	K20716	-	3.7439	up	YDA	PREDICTED: mitogen-activated protein kinase kinase kinase A-like [Erythranthe guttata]	0.87	2.56	3.7	1.18	4.25	4.59	0.19	0.13	0.38	0.51	0.59	0.13	2.86	0.32
map04016	MAPK signaling pathway - plant	1.7368e-07	TRINITY_DN44596_c1_g4	K20553	EC:3.1.13.-	1.1574	up	XRN4	5'-3' exoribonuclease 4 [Sesamum indicum]	5.14	4.98	3.03	7.97	6.75	7.32	5.99	3.7	3.35	5.31	4.86	3.95	5.86	4.53
map04016	MAPK signaling pathway - plant	1.7368e-07	TRINITY_DN41901_c1_g2	K13420	EC:2.7.11.1	5.59358	up	XA21	Serine/threonine protein kinase [Handroanthus impetiginosus]	4.98	11.11	5.58	4.09	4.88	10.72	0.32	0.32	0.23	0.05	0.05	0.62	6.89	0.27
map04016	MAPK signaling pathway - plant	1.7368e-07	TRINITY_DN44950_c0_g6	K13420	EC:2.7.11.1	-2.00728	down	XA21	probable LRR receptor-like serine/threonine-protein kinase At3g47570 [Solanum pennellii]	3.16	1.48	3.02	5.38	2.08	5.12	22.11	13.13	25.75	18.47	18.01	22.15	3.37	19.94
map04016	MAPK signaling pathway - plant	1.7368e-07	TRINITY_DN47846_c0_g1	K13424	-	-2.57737	down	WRKY75	PREDICTED: probable WRKY transcription factor 75 [Juglans regia]	0.4	0.25	0.41	0.24	0.13	0.81	1.91	1.01	1.5	2.65	15.05	2.37	0.37	4.08
map04016	MAPK signaling pathway - plant	1.7368e-07	TRINITY_DN39672_c3_g1	K13425	-	4.52709	up	WRKY7	probable WRKY transcription factor 7 [Sesamum indicum]	13.64	42.2	78.88	9.49	13.76	26.42	3.57	3.48	3.23	2.09	1.69	4.72	30.73	3.13
map04016	MAPK signaling pathway - plant	1.7368e-07	TRINITY_DN43871_c1_g3	K13425	-	-2.27258	down	WRKY7	WRKY DNA-binding protein 7 isoform 1 [Dorcoceras hygrometricum]	2.71	2.82	3.84	1.7	2.63	3.1	26.81	14.35	14.26	25.09	36.83	37.6	2.8	25.82
map04016	MAPK signaling pathway - plant	1.7368e-07	TRINITY_DN40313_c0_g2	K13425	-	3.65068	up	WRKY69	probable WRKY transcription factor 69 [Sesamum indicum]	22.4	66.95	51.61	24.65	5.79	74.36	6.99	0.46	3.35	3.98	17.15	7.24	40.96	6.53
map04016	MAPK signaling pathway - plant	1.7368e-07	TRINITY_DN47248_c1_g4	K13425	-	1.96009	up	WRKY69	hypothetical protein CDL12_05857 [Handroanthus impetiginosus]	17.68	25.69	9.48	56.04	23.46	17.78	7.96	5.3	5.58	11.73	33.4	9.26	25.02	12.21
map04016	MAPK signaling pathway - plant	1.7368e-07	TRINITY_DN35264_c0_g1	K13424	-	2.36843	up	WRKY57	probable WRKY transcription factor 57 isoform X1 [Sesamum indicum]	1.92	6.49	6.43	2.48	1.49	3.67	0.97	0.53	0.36	0.89	4.69	1.43	3.75	1.48
map04016	MAPK signaling pathway - plant	1.7368e-07	TRINITY_DN48111_c3_g1	K13424	-	3.4161	up	WRKY51	probable WRKY transcription factor 75 [Solanum lycopersicum]	7.41	6.42	2.59	31.35	5.43	5.14	0	0.16	0.16	0.71	4.58	4.46	9.72	1.68
map04016	MAPK signaling pathway - plant	1.7368e-07	TRINITY_DN38443_c0_g10	K13424	-	4.17991	up	WRKY50	probable WRKY transcription factor 50 [Coffea arabica]	2.5	1.15	2.86	5.56	5.4	2.59	0	0.09	0	0.3	0.4	0.87	3.34	0.28
map04016	MAPK signaling pathway - plant	1.7368e-07	TRINITY_DN38443_c0_g15	K13424	-	5.48494	up	WRKY50	probable WRKY transcription factor 50 [Sesamum indicum]	2.51	4.83	3.79	12.95	6.09	3.49	0.08	0.24	0.04	0.19	0.11	0.68	5.61	0.22
map04016	MAPK signaling pathway - plant	1.7368e-07	TRINITY_DN38443_c0_g3	K13424	-	2.8284	up	WRKY50	probable WRKY transcription factor 50 [Coffea arabica]	15.53	11.99	6.53	20.44	9.43	26.74	1.53	0.48	0.4	1.68	10.47	6.92	15.11	3.58
map04016	MAPK signaling pathway - plant	1.7368e-07	TRINITY_DN45070_c0_g8	K13424	-	2.96189	up	WRKY48	hypothetical protein CDL12_04017 [Handroanthus impetiginosus]	2.16	3.78	3.95	2.88	1.62	5.37	0.49	0.34	0.85	0.43	1.51	1.08	3.29	0.78
map04016	MAPK signaling pathway - plant	1.7368e-07	TRINITY_DN45450_c0_g1	K13424	-	-4.7292	down	WRKY42	probable WRKY transcription factor 31 isoform X1 [Sesamum indicum]	0	0	0.08	0	0.15	0	0.22	0.3	0	0.22	10.49	1.5	0.04	2.12
map04016	MAPK signaling pathway - plant	1.7368e-07	TRINITY_DN41283_c1_g5	K13424	-	-1.02574	down	WRKY4	LOW QUALITY PROTEIN: probable WRKY transcription factor 4 [Sesamum indicum]	4.89	3.64	2.03	5.13	2.53	3.25	12.09	10.88	12.19	11.06	15.86	13.83	3.58	12.65
map04016	MAPK signaling pathway - plant	1.7368e-07	TRINITY_DN50054_c0_g2	K13425	-	-1.3433	down	WRKY35	probable WRKY transcription factor 35 [Sesamum indicum]	1.93	9.43	5.87	15.75	32.53	23.57	60.27	35.3	43.39	51.01	19.64	36.74	14.85	41.06
map04016	MAPK signaling pathway - plant	1.7368e-07	TRINITY_DN52528_c2_g1	K13424	-	6.3551	up	WRKY33	hypothetical protein CDL12_07620 [Handroanthus impetiginosus]	273.5	213.53	171.24	254.7	202.96	260.12	3.86	4	1.61	4.85	7.03	8.46	229.34	4.97
map04016	MAPK signaling pathway - plant	1.7368e-07	TRINITY_DN52528_c2_g2	K13424	-	4.74145	up	WRKY33	LOW QUALITY PROTEIN: probable WRKY transcription factor 33 [Sesamum indicum]	92.88	91.79	64.24	49.19	71.6	126.06	23.17	22.59	22.76	24.81	21.15	20.83	82.63	22.55
map04016	MAPK signaling pathway - plant	1.7368e-07	TRINITY_DN41283_c1_g1	K13424	-	2.11738	up	WRKY3	probable WRKY transcription factor 3 isoform X2 [Sesamum indicum]	11.41	7.7	6.45	9.72	6.43	12.22	5.06	4.79	3.19	5.28	6.42	3.74	8.99	4.75
map04016	MAPK signaling pathway - plant	1.7368e-07	TRINITY_DN47788_c0_g6	K13424	-	2.59826	up	WRKY24	WRKY transcription factor WRKY24-like [Coffea eugenioides]	9.72	20	22.21	10.8	9.34	17.71	3.33	2.18	2.33	4.02	4.53	4.97	14.96	3.56
map04016	MAPK signaling pathway - plant	1.7368e-07	TRINITY_DN44919_c0_g2	K13424	-	4.69937	up	WRKY23	hypothetical protein CDL12_11809 [Handroanthus impetiginosus]	0	3.85	8.2	0.11	0.35	0.61	0.12	0	0	0.57	0.35	0.11	2.19	0.19
map04016	MAPK signaling pathway - plant	1.7368e-07	TRINITY_DN24653_c0_g1	K13426	-	8.23009	up	WRKY22	probable WRKY transcription factor 29 [Sesamum indicum]	6.48	70.89	171.21	3.04	25.16	26.01	0.87	0.3	0.27	0.32	0.35	0.31	50.47	0.4
map04016	MAPK signaling pathway - plant	1.7368e-07	TRINITY_DN51789_c3_g1	K13425	-	4.77585	up	WRKY22	WRKY transcription factor [Catalpa bungei]	9.66	10.66	22.77	3.69	2.31	8.26	0.72	0.89	1.45	0.08	0.5	0.97	9.56	0.77
map04016	MAPK signaling pathway - plant	1.7368e-07	TRINITY_DN52993_c0_g5	K13425	-	4.28463	up	WRKY22	WRKY transcription factor [Catalpa bungei]	2.86	8.28	19.15	2.83	1.79	3.41	1.05	0.49	0.53	0.33	1.78	0.38	6.39	0.76
map04016	MAPK signaling pathway - plant	1.7368e-07	TRINITY_DN52993_c0_g7	K13425	-	2.98801	up	WRKY22	WRKY transcription factor [Catalpa bungei]	3.76	6.07	21.63	2.35	4	9.07	2.04	1.74	1.74	1.88	2.29	2	7.81	1.95
map04016	MAPK signaling pathway - plant	1.7368e-07	TRINITY_DN44998_c0_g2	K13425	-	-5.10654	down	WRKY21	WRKY protein [Salvia miltiorrhiza]	0.19	0.06	0.07	0.11	0.28	0.1	6.01	9	6.57	12.42	11.42	3.14	0.13	8.09
map04016	MAPK signaling pathway - plant	1.7368e-07	TRINITY_DN39863_c0_g2	K13414	EC:2.7.11.25	1.22716	up	WRKY19	unnamed protein product, partial [Vitis vinifera]	4.73	7.94	6.56	6	5.39	9.8	7.99	4.42	6.26	5.27	7.53	8.68	6.74	6.69
map04016	MAPK signaling pathway - plant	1.7368e-07	TRINITY_DN49407_c1_g2	K13425	-	5.24774	up	WRKY15	hypothetical protein CDL12_01096 [Handroanthus impetiginosus]	27.7	90.91	152.28	24.78	25.96	66.92	3.25	3.93	3.3	2.64	2.65	6.85	64.76	3.77
map04016	MAPK signaling pathway - plant	1.7368e-07	TRINITY_DN33495_c0_g1	K13424	-	-1.44768	down	WRKY13	WRKY protein [Salvia miltiorrhiza]	0.48	0.79	0.5	2.8	1.48	1.04	6.33	5.92	7.68	5.52	4.78	2.16	1.18	5.4
map04016	MAPK signaling pathway - plant	1.7368e-07	TRINITY_DN37417_c0_g3	K13425	-	3.85221	up	WRKY11	probable WRKY transcription factor 17 [Sesamum indicum]	37.9	77.17	105.79	24.29	27.19	43.9	6.99	4.34	9.32	5.15	6.88	12.48	52.71	7.53
map04016	MAPK signaling pathway - plant	1.7368e-07	TRINITY_DN39672_c3_g2	K13425	-	5.81882	up	WRKY11	probable WRKY transcription factor 7 [Sesamum indicum]	15.25	59.52	141.1	9.27	17.79	37.15	1.98	1.17	1.78	1.02	1.85	3.99	46.68	1.96
map04016	MAPK signaling pathway - plant	1.7368e-07	TRINITY_DN1918_c0_g1	K20725	-	8.96012	up	VQ8	VQ motif-containing protein 20 [Sesamum indicum]	0.41	16.17	24.27	1.69	2.3	5.17	0.08	0	0	0.08	0	0	8.33	0.03
map04016	MAPK signaling pathway - plant	1.7368e-07	TRINITY_DN43791_c1_g2	K14498	EC:2.7.11.1	4.1915	up	SRK2B	zinc finger CCCH domain-containing protein 17 [Catalpa bungei]	47.15	60.85	51.71	53.35	52.27	85.62	6.03	4.32	3.94	6.14	8.03	5.6	58.49	5.68
map04016	MAPK signaling pathway - plant	1.7368e-07	TRINITY_DN44636_c0_g3	K14498	EC:2.7.11.1	-1.58426	down	SAPK8	serine/threonine-protein kinase SAPK10 [Sesamum indicum]	15.75	9.34	4.31	15.04	10.46	11	52.94	48.59	51.92	59.52	66.11	66.93	10.98	57.67
map04016	MAPK signaling pathway - plant	1.7368e-07	TRINITY_DN43861_c2_g6	K20726	-	-1.24926	down	RTH	protein RTE1-HOMOLOG [Sesamum indicum]	4.44	2.62	4.16	2.39	2.27	2.15	14.95	16.21	17.2	14.9	17.5	13.01	3.01	15.63
map04016	MAPK signaling pathway - plant	1.7368e-07	TRINITY_DN40098_c0_g2	K20726	-	-1.34326	down	RTE1	protein REVERSION-TO-ETHYLENE SENSITIVITY1-like [Sesamum indicum]	3.16	1.52	1.86	1.11	2.15	1.55	8.09	5.87	10.32	9.01	4.91	6.52	1.89	7.45
map04016	MAPK signaling pathway - plant	1.7368e-07	TRINITY_DN42876_c0_g2	K13420	EC:2.7.11.1	5.24067	up	RLP30	receptor-like protein 12 [Sesamum indicum]	1.75	8.7	2.72	9.71	0.12	0.13	0.09	0.06	0.06	0.13	0.67	0.07	3.85	0.18
map04016	MAPK signaling pathway - plant	1.7368e-07	TRINITY_DN42038_c0_g1	K20557	-	4.30525	up	RF2b	uncharacterized protein LOC105169746 [Sesamum indicum]	5.69	1.02	0.55	9.42	5.5	5.52	0.43	0.31	0.56	0.05	0.09	0.77	4.62	0.37
map04016	MAPK signaling pathway - plant	1.7368e-07	TRINITY_DN42038_c0_g3	K20557	-	2.2833	up	RF2b	uncharacterized protein LOC105169746 [Sesamum indicum]	1.77	2.28	2.95	2.22	6.48	6.06	1.3	0.92	2.99	0.46	0.31	3.82	3.63	1.63
map04016	MAPK signaling pathway - plant	1.7368e-07	TRINITY_DN42038_c0_g7	K20557	-	1.40971	up	RF2b	hypothetical protein CDL12_13095 [Handroanthus impetiginosus]	20.96	15.56	16.58	26.58	29.62	31.66	12.29	15.7	22.38	13.65	12.33	21.49	23.49	16.31
map04016	MAPK signaling pathway - plant	1.7368e-07	TRINITY_DN43759_c0_g2	K20557	-	-3.72998	down	RF2b	PREDICTED: transcription factor RF2b isoform X1 [Vitis vinifera]	0.29	0.07	0.08	0	0	0	0.49	1.19	3.38	0.35	0.14	5.81	0.07	1.89
map04016	MAPK signaling pathway - plant	1.7368e-07	TRINITY_DN46778_c1_g1	K20557	-	-2.86836	down	RF2b	transcription factor RF2b [Sesamum indicum]	0.14	0.27	0	0.13	0.14	0	0.55	0.28	2.72	0	0	6.71	0.11	1.71
map04016	MAPK signaling pathway - plant	1.7368e-07	TRINITY_DN31030_c0_g2	K02183	-	-8.27282	down	RER4	Protein RETICULATA-RELATED 4 chloroplastic [Zea mays]	0	0	0	0	0	0	3.67	3.77	3.32	3.2	0	0	0	2.33
map04016	MAPK signaling pathway - plant	1.7368e-07	TRINITY_DN41338_c1_g1	K13447	EC:1.6.3.- 1.11.1.-	3.30746	up	RBOHC	whitefly-induced gp91-phox [Dorcoceras hygrometricum]	30.22	94.03	114.27	33.64	31.1	82.43	15.72	17.31	29.28	22.58	9.58	20.46	64.28	19.16
map04016	MAPK signaling pathway - plant	1.7368e-07	TRINITY_DN41553_c2_g6	K17686	EC:3.6.3.54	3.05215	up	RAN1	hypothetical protein F511_33790 [Dorcoceras hygrometricum]	29.33	46.69	45.38	37.93	39.84	83.46	10.93	9	17.77	9.34	8.49	10.68	47.1	11.04
map04016	MAPK signaling pathway - plant	1.7368e-07	TRINITY_DN51663_c3_g12	K17686	EC:3.6.3.54	2.59283	up	RAN1	Cation transport ATPase [Handroanthus impetiginosus]	6.86	10.76	7.9	7.09	11.85	11.51	1.81	2.19	6.16	2.16	2.24	1.43	9.33	2.67
map04016	MAPK signaling pathway - plant	1.7368e-07	TRINITY_DN55503_c0_g2	K17686	EC:3.6.3.54	2.77389	up	RAN1	Cation transport ATPase [Handroanthus impetiginosus]	8.05	13.75	12.06	7.96	9.82	13.95	3.34	3.95	5.59	5.69	2.21	2.74	10.93	3.92
map04016	MAPK signaling pathway - plant	1.7368e-07	TRINITY_DN38912_c0_g4	K14496	-	1.88364	up	PYL8	abscisic acid receptor PYL8 [Sesamum indicum]	37.45	12.03	6.46	59.6	34.58	25.77	15.61	16.81	13.84	18.23	18.89	16.36	29.32	16.62
map04016	MAPK signaling pathway - plant	1.7368e-07	TRINITY_DN38912_c0_g8	K14496	-	-2.53414	down	PYL8	abscisic acid receptor PYL8 [Sesamum indicum]	12.81	3.97	2.71	11.71	8.67	5.92	61.59	73	63.92	82.2	79.8	78.05	7.63	73.09
map04016	MAPK signaling pathway - plant	1.7368e-07	TRINITY_DN40986_c1_g4	K14496	-	4.75744	up	PYL4	abscisic acid receptor PYL4-like [Sesamum indicum]	1.71	16.84	16.33	3.98	3.38	4.13	0.69	0.59	0.31	0.32	0.88	0.88	7.73	0.61
map04016	MAPK signaling pathway - plant	1.7368e-07	TRINITY_DN40986_c1_g6	K14496	-	4.47327	up	PYL4	abscisic acid receptor PYL4 [Sesamum indicum]	2.38	27.71	31.81	5.7	11.03	3.99	1.11	1.6	3.22	0.62	0.14	1.41	13.77	1.35
map04016	MAPK signaling pathway - plant	1.7368e-07	TRINITY_DN40986_c1_g8	K14496	-	2.5961	up	PYL4	abscisic acid receptor PYL4 [Sesamum indicum]	8.3	45.21	54.86	10.59	16.91	18.42	8.24	9.78	8.57	11.81	5.04	11.18	25.72	9.1
map04016	MAPK signaling pathway - plant	1.7368e-07	TRINITY_DN44673_c5_g8	K14496	-	5.07523	up	PYL4	hypothetical protein CDL12_23235 [Handroanthus impetiginosus]	4.67	10.62	11.62	10.7	11.23	6.58	0.25	0.18	0.63	0	0.2	1.92	9.24	0.53
map04016	MAPK signaling pathway - plant	1.7368e-07	TRINITY_DN47151_c2_g6	K14496	-	4.35193	up	PYL4	abscisic acid receptor PYL4 [Sesamum indicum]	29.19	34.06	29.45	33.36	21.47	20.56	1.29	2.98	1.65	3.71	3.48	2.05	28.02	2.53
map04016	MAPK signaling pathway - plant	1.7368e-07	TRINITY_DN48934_c1_g4	K14496	-	3.83328	up	PYL4	abscisic acid receptor PYL4-like [Hevea brasiliensis]	9.02	28.07	46.63	39.28	28.85	20.98	4.05	0.71	1.04	0.63	1.93	10.82	28.8	3.2
map04016	MAPK signaling pathway - plant	1.7368e-07	TRINITY_DN58106_c0_g1	K14496	-	4.54207	up	PYL4	hypothetical protein CDL12_23235 [Handroanthus impetiginosus]	0	15.29	16.02	5.87	5.71	4.34	0.25	0	0	0.48	0	3.31	7.87	0.67
map04016	MAPK signaling pathway - plant	1.7368e-07	TRINITY_DN52867_c0_g6	K13420	EC:2.7.11.1	-2.73079	down	PSKR1	Leucine-rich repeat protein [Handroanthus impetiginosus]	0.85	0.78	0.25	0.96	0.8	0.63	6.79	7.47	7.73	9.03	9.31	8.72	0.71	8.18
map04016	MAPK signaling pathway - plant	1.7368e-07	TRINITY_DN42545_c1_g3	K14497	EC:3.1.3.16	5.14232	up	PP2CA	protein phosphatase 2C 37-like [Sesamum indicum]	1236.6	900.63	599.58	1635.23	1048.71	1696.82	83.03	34.33	52.62	45.67	51.53	90.41	1186.26	59.6
map04016	MAPK signaling pathway - plant	1.7368e-07	TRINITY_DN42545_c1_g6	K14497	EC:3.1.3.16	1.0889	up	PP2CA	protein phosphatase 2C 37-like [Sesamum indicum]	51.48	55.54	39.87	79.94	105.51	167.07	88.74	33.57	64.57	40.37	49.78	75.09	83.23	58.69
map04016	MAPK signaling pathway - plant	1.7368e-07	TRINITY_DN43796_c2_g1	K14514	-	1.61874	up	PHO1-H1	phosphate transporter PHO1 homolog 1 [Sesamum indicum]	23.15	12.98	1.95	25.67	0.73	2.55	4.87	1.39	3.05	13.59	13.91	2.9	11.17	6.62
map04016	MAPK signaling pathway - plant	1.7368e-07	TRINITY_DN42624_c3_g11	K02183	-	1.18959	up	PCM3	calmodulin-like protein, partial [Capsicum annuum]	20.45	38.17	42.62	23.96	27.64	34.41	21.46	22.14	30.39	19.43	29.66	36.25	31.21	26.56
map04016	MAPK signaling pathway - plant	1.7368e-07	TRINITY_DN42624_c3_g5	K02183	-	1.12925	up	PCM3	calmodulin, partial [Castanea sativa]	7.75	14.71	23.57	8.15	6.33	17.51	11.42	9.78	14.56	7.29	8.25	21.67	13	12.16
map04016	MAPK signaling pathway - plant	1.7368e-07	TRINITY_DN35856_c0_g1	K20714	EC:2.7.11.1	2.74307	up	OXI1	serine/threonine-protein kinase OXI1 [Sesamum indicum]	35.32	64.07	37.4	36.88	37.26	62.63	22.23	8.82	8.61	12.76	13.96	8.97	45.59	12.56
map04016	MAPK signaling pathway - plant	1.7368e-07	TRINITY_DN42081_c1_g7	K14497	EC:3.1.3.16	1.47539	up	Os01g0656200	Serine/threonine protein phosphatase [Handroanthus impetiginosus]	1.84	4.06	5.63	1.26	11.34	21.47	15.95	6.76	7.51	9.77	2.38	6.19	7.6	8.09
map04016	MAPK signaling pathway - plant	1.7368e-07	TRINITY_DN40136_c0_g3	K14497	EC:3.1.3.16	-2.6858	down	Os01g0583100	probable protein phosphatase 2C 50 [Sesamum indicum]	0.99	0.46	0.43	1.05	0.94	0.38	7.05	12.95	12.89	8.61	9.47	11.01	0.71	10.33
map04016	MAPK signaling pathway - plant	1.7368e-07	TRINITY_DN40929_c1_g9	K14497	EC:3.1.3.16	-1.29428	down	Os01g0583100	probable protein phosphatase 2C 50 [Sesamum indicum]	6.38	2.73	1.3	4.19	2.86	2.72	22.81	6.66	14.87	13.31	9.64	17.55	3.36	14.14
map04016	MAPK signaling pathway - plant	1.7368e-07	TRINITY_DN53715_c0_g2	K14497	EC:3.1.3.16	-1.55275	down	Os01g0583100	probable protein phosphatase 2C 50, partial [Olea europaea var. sylvestris]	4.4	2.1	1.55	4.34	2.4	4.49	14.43	13.71	19.91	14.01	20.9	24.04	3.21	17.83
map04016	MAPK signaling pathway - plant	1.7368e-07	TRINITY_DN53862_c0_g7	K14497	EC:3.1.3.16	-1.12948	down	Os01g0583100	probable protein phosphatase 2C 50 [Sesamum indicum]	13.55	7.02	3.53	8.75	13.41	7.75	43.19	29.79	32.29	39.49	25.21	29.95	9	33.32
map04016	MAPK signaling pathway - plant	1.7368e-07	TRINITY_DN41824_c0_g1	K20535	EC:2.7.11.24	-1.05352	down	NTF3	mitogen-activated protein kinase homolog NTF3 [Sesamum indicum]	4.17	2.7	1.5	3.58	4.16	3.04	11.72	8.66	13.14	10.72	11.48	13.87	3.19	11.6
map04016	MAPK signaling pathway - plant	1.7368e-07	TRINITY_DN41824_c0_g3	K20535	EC:2.7.11.24	-1.402	down	NTF3	hypothetical protein GOBAR_AA31917 [Gossypium barbadense]	17.59	7.61	5.62	19.31	20.05	11.96	48.17	54.43	62.67	75.82	76.35	50.9	13.69	61.39
map04016	MAPK signaling pathway - plant	1.7368e-07	TRINITY_DN44165_c2_g5	K20716	-	6.92364	up	NPK1	mitogen-activated protein kinase kinase kinase NPK1-like [Sesamum indicum]	56.07	88	97.11	41.81	139.77	164.57	1.39	1.3	1.58	1.03	1.01	2.68	97.89	1.5
map04016	MAPK signaling pathway - plant	1.7368e-07	TRINITY_DN50568_c0_g12	K20716	-	8.00571	up	NPK1	mitogen-activated protein kinase kinase kinase NPK1 [Sesamum indicum]	35.27	53.61	35.79	17.54	55.12	41.8	0.29	0.12	0.14	0.24	0.39	0.55	39.85	0.29
map04016	MAPK signaling pathway - plant	1.7368e-07	TRINITY_DN43785_c3_g4	K00940	EC:2.7.4.6	1.47413	up	Nme2	nucleoside diphosphate kinase-like [Quercus suber]	4.18	3.95	3.4	3.07	3.76	2.74	2.16	2.44	1.98	2.29	2.65	2.29	3.52	2.3
map04016	MAPK signaling pathway - plant	1.7368e-07	TRINITY_DN38713_c0_g1	K02183	-	1.05672	up	MYL6	calmodulin [Selaginella moellendorffii]	9.12	9.6	12.84	11.44	12.77	6.51	10.66	12.49	14.43	5.55	5.44	5.57	10.38	9.02
map04016	MAPK signaling pathway - plant	1.7368e-07	TRINITY_DN53474_c2_g4	K02183	-	1.09248	up	MYL12B	calmodulin-1 [Vaccinium corymbosum]	3.38	3.74	4.01	3.31	3.6	3.09	3.91	3.12	2.33	3.25	2.47	3.32	3.52	3.07
map04016	MAPK signaling pathway - plant	1.7368e-07	TRINITY_DN42423_c0_g8	K13422	-	1.87266	up	MYC2	hypothetical protein CDL12_04759 [Handroanthus impetiginosus]	13.14	34.1	22.47	13.74	48.76	55.84	16.42	9.88	8.37	14.38	19.95	14.06	31.34	13.84
map04016	MAPK signaling pathway - plant	1.7368e-07	TRINITY_DN43272_c1_g8	K13422	-	1.5795	up	MYC2	transcription factor MYC4-like [Sesamum indicum]	33.99	48.17	44.04	33.89	50.62	45.54	27.28	21.39	19.32	34.65	36.74	19.87	42.71	26.54
map04016	MAPK signaling pathway - plant	1.7368e-07	TRINITY_DN43642_c0_g5	K13422	-	3.5414	up	MYC2	transcription factor MYC2 [Sesamum indicum]	11.12	62.58	38.17	12.12	113.22	90.59	12	11.66	3.47	12.87	2.5	8.57	54.63	8.51
map04016	MAPK signaling pathway - plant	1.7368e-07	TRINITY_DN53901_c0_g5	K20538	EC:2.7.11.24	1.67351	up	MPK9	Mitogen-activated protein kinase [Handroanthus impetiginosus]	29.05	14.11	7.64	25.46	15.22	30.9	12.29	9.73	10.5	13.24	17.87	14.04	20.4	12.94
map04016	MAPK signaling pathway - plant	1.7368e-07	TRINITY_DN52222_c0_g11	K20538	EC:2.7.11.24	1.92469	up	MPK8	Mitogen-activated protein kinase [Handroanthus impetiginosus]	13.4	7.02	7.25	13.18	13.96	14.38	7.68	7.51	8.36	9.03	4.65	10.09	11.53	7.89
map04016	MAPK signaling pathway - plant	1.7368e-07	TRINITY_DN43306_c1_g1	K20538	EC:2.7.11.24	3.54633	up	MPK7	mitogen-activated protein kinase 19 isoform X1 [Sesamum indicum]	110.48	54.48	40.9	103.75	38.89	80.57	11.37	8.26	9.55	10.95	12.82	14.19	71.51	11.19
map04016	MAPK signaling pathway - plant	1.7368e-07	TRINITY_DN40299_c0_g2	K20536	EC:2.7.11.24	7.18256	up	MPK5	mitogen-activated protein kinase 13 [Linum usitatissimum]	199.81	96.43	59.99	148.54	179.41	235.5	1.81	2.2	1.16	1.25	2.36	2.41	153.28	1.86
map04016	MAPK signaling pathway - plant	1.7368e-07	TRINITY_DN45202_c0_g1	K20536	EC:2.7.11.24	5.77692	up	MPK3	mitogen-activated protein kinase 3 [Sesamum indicum]	102.25	108.51	85.22	91.37	81.25	164.23	3.39	3.27	4.27	3.29	4.19	4.98	105.47	3.9
map04016	MAPK signaling pathway - plant	1.7368e-07	TRINITY_DN45202_c0_g4	K20536	EC:2.7.11.24	6.12207	up	MPK3	PREDICTED: mitogen-activated protein kinase 3 [Erythranthe guttata]	191.02	125.51	99.46	154.68	203.43	226.49	4.15	5.88	3.55	4.68	3.55	4.39	166.77	4.37
map04016	MAPK signaling pathway - plant	1.7368e-07	TRINITY_DN39804_c2_g3	K20538	EC:2.7.11.24	2.69943	up	MPK20	mitogen-activated protein kinase 20-like [Sesamum indicum]	11.91	13.39	18.43	12.4	15.5	33.56	6.44	7.11	8.63	8.48	4.25	7.1	17.53	7
map04016	MAPK signaling pathway - plant	1.7368e-07	TRINITY_DN47281_c0_g7	K20538	EC:2.7.11.24	4.48881	up	MPK19	Mitogen-activated protein kinase 10 [Capsicum baccatum]	39.31	6.95	4.06	32.52	14.89	22.33	1.08	1.7	1.46	2.02	1.14	2.04	20.01	1.57
map04016	MAPK signaling pathway - plant	1.7368e-07	TRINITY_DN43306_c1_g4	K20538	EC:2.7.11.24	3.04894	up	MPK18	mitogen-activated protein kinase 19 isoform X1 [Sesamum indicum]	47.99	16.05	12.15	33.71	21.81	29.44	6.63	5.55	5.89	6.07	5.33	5.24	26.86	5.79
map04016	MAPK signaling pathway - plant	1.7368e-07	TRINITY_DN44062_c0_g8	K20538	EC:2.7.11.24	1.57876	up	MPK16	mitogen-activated protein kinase 13, partial [Dorcoceras hygrometricum]	20.58	7.78	4.41	15.56	11.93	10.94	6.61	6.31	3.82	10.94	4.6	5.15	11.87	6.24
map04016	MAPK signaling pathway - plant	1.7368e-07	TRINITY_DN52222_c0_g4	K20538	EC:2.7.11.24	1.71132	up	MPK14	mitogen-activated protein kinase 9-like [Sesamum indicum]	21.41	14.74	15.79	24.84	16.19	29.99	15.36	12.7	14.31	10.5	15.21	20.32	20.49	14.73
map04016	MAPK signaling pathway - plant	1.7368e-07	TRINITY_DN52222_c0_g5	K20538	EC:2.7.11.24	-1.14916	down	MPK13	Mitogen-activated protein kinase [Handroanthus impetiginosus]	11.45	7.02	4.97	12.32	11.66	10.77	30.38	21.27	26.73	27.19	26.77	37.71	9.7	28.34
map04016	MAPK signaling pathway - plant	1.7368e-07	TRINITY_DN52222_c0_g6	K20538	EC:2.7.11.24	1.66074	up	MPK12	Mitogen-activated protein kinase [Handroanthus impetiginosus]	12.13	9.14	5.59	12.83	13.64	17.07	4.26	4.58	5.62	6.4	6.2	6.35	11.73	5.57
map04016	MAPK signaling pathway - plant	1.7368e-07	TRINITY_DN53901_c0_g1	K20538	EC:2.7.11.24	1.59179	up	MPK12	mitogen-activated protein kinase 9-like isoform X1 [Olea europaea var. sylvestris]	19.21	9.96	12.83	15.44	16.52	17.95	14.69	11.32	15.37	14.8	9.54	21.8	15.32	14.59
map04016	MAPK signaling pathway - plant	1.7368e-07	TRINITY_DN39804_c2_g2	K20538	EC:2.7.11.24	1.16726	up	MPK10	mitogen-activated protein kinase 20 [Sesamum indicum]	9.27	6.15	4.23	7.32	14.72	8.64	7.37	4.44	8.34	8	5.79	7.54	8.39	6.91
map04016	MAPK signaling pathway - plant	1.7368e-07	TRINITY_DN41346_c3_g4	K20538	EC:2.7.11.24	2.18817	up	MPK10	PREDICTED: mitogen-activated protein kinase 20 isoform X1 [Juglans regia]	7.02	13.9	22.13	5.48	7.42	9.95	8.18	11.61	10.78	3.79	2.6	7.64	10.98	7.43
map04016	MAPK signaling pathway - plant	1.7368e-07	TRINITY_DN49181_c1_g1	K20538	EC:2.7.11.24	1.95587	up	MPK10	mitogen-activated protein kinase 20-like [Sesamum indicum]	18.58	28.27	66.49	15.63	20.07	33.48	13.99	17.71	21.08	10.72	7.99	20.99	30.42	15.41
map04016	MAPK signaling pathway - plant	1.7368e-07	TRINITY_DN49181_c1_g2	K20538	EC:2.7.11.24	1.00259	up	MPK10	mitogen-activated protein kinase 19 [Solanum lycopersicum]	13.94	7.65	7.81	8.51	15.66	11.51	9.55	9.82	10.88	8.38	3.78	16.13	10.85	9.76
map04016	MAPK signaling pathway - plant	1.7368e-07	TRINITY_DN50590_c0_g5	K20725	-	3.84934	up	MKS1	hypothetical protein CDL12_06700 [Handroanthus impetiginosus]	11.14	41.44	45.6	27.22	44.59	29.94	3.66	5.53	2.83	5.39	5.99	3.19	33.32	4.43
map04016	MAPK signaling pathway - plant	1.7368e-07	TRINITY_DN50590_c0_g7	K20725	-	-1.31851	down	MKS1	hypothetical protein CDL12_06700 [Handroanthus impetiginosus]	2.86	2.59	0.85	4.12	5.36	2.89	12.42	12.17	12.87	14.88	15.65	10.49	3.11	13.08
map04016	MAPK signaling pathway - plant	1.7368e-07	TRINITY_DN52942_c0_g3	K20716	-	8.58991	up	mkkA	mitogen-activated protein kinase kinase kinase 2 [Sesamum indicum]	5.35	73.35	94.36	5.87	28.61	52.59	0.17	0.13	0.16	0.26	0.28	0.46	43.35	0.24
map04016	MAPK signaling pathway - plant	1.7368e-07	TRINITY_DN41134_c1_g6	K20604	EC:2.7.12.2	1.95782	up	MKK9	hypothetical protein MIMGU_mgv1a010108mg [Erythranthe guttata]	145.48	52.4	34.85	129.19	79.11	48.76	36.88	31.54	17.02	41.67	60.33	21.77	81.63	34.87
map04016	MAPK signaling pathway - plant	1.7368e-07	TRINITY_DN46924_c2_g4	K20604	EC:2.7.12.2	1.66299	up	MKK9	hypothetical protein MIMGU_mgv1a010108mg [Erythranthe guttata]	193.09	125.39	92.11	136.22	157.5	131.14	62.45	58.36	41.21	104.62	127.33	70.84	139.24	77.47
map04016	MAPK signaling pathway - plant	1.7368e-07	TRINITY_DN42534_c0_g4	K14497	EC:3.1.3.16	-1.04175	down	MKK5	putative disease resistance RPP13-like protein 1 [Sesamum indicum]	9.63	7.56	6.25	10.63	6.24	7.81	29.47	23.81	30.04	28.66	36.28	33.06	8.02	30.22
map04016	MAPK signaling pathway - plant	1.7368e-07	TRINITY_DN46314_c1_g4	K13413	EC:2.7.12.2	1.50317	up	MKK5	Mitogen-activated protein kinase kinase (MAP2K) [Handroanthus impetiginosus]	8.64	16.01	13.29	11.32	12.49	17.37	9.4	8.13	8.03	9.18	9.18	8.02	13.19	8.66
map04016	MAPK signaling pathway - plant	1.7368e-07	TRINITY_DN38612_c1_g4	K13413	EC:2.7.12.2	3.67907	up	MKK4	Mitogen-activated protein kinase kinase (MAP2K) [Handroanthus impetiginosus]	4.51	30.17	32	10.53	4.52	16.27	2.92	1.87	2.2	1.82	2.03	3.01	16.33	2.31
map04016	MAPK signaling pathway - plant	1.7368e-07	TRINITY_DN42489_c3_g1	K20605	EC:2.7.11.25	3.37926	up	MEKK1	Mitogen-activated protein kinase kinase kinase [Handroanthus impetiginosus]	24.08	22.34	27.19	25.99	29.78	40.35	6.49	6.67	5.76	7.1	6.29	9.43	28.29	6.96
map04016	MAPK signaling pathway - plant	1.7368e-07	TRINITY_DN51542_c0_g11	K13414	EC:2.7.11.25	2.67599	up	MEKK1	mitogen-activated protein kinase kinase kinase 1 isoform X1 [Sesamum indicum]	1.77	6.77	1.55	0.56	3.48	5.21	0.4	1.38	1.09	1.47	0.24	1.02	3.22	0.93
map04016	MAPK signaling pathway - plant	1.7368e-07	TRINITY_DN55057_c0_g4	K13414	EC:2.7.11.25	1.39587	up	MEKK1	mitogen-activated protein kinase kinase kinase 1 isoform X1 [Sesamum indicum]	3.44	4.49	3.78	5.51	6.27	7.51	3.77	4.7	4.88	3.74	2.39	3.95	5.17	3.91
map04016	MAPK signaling pathway - plant	1.7368e-07	TRINITY_DN55057_c0_g8	K13414	EC:2.7.11.25	1.50756	up	MEKK1	mitogen-activated protein kinase kinase kinase 1 [Sesamum indicum]	23.27	14.96	11.45	22.54	27.43	17.77	12.81	15.44	14.25	16.19	6.38	5.79	19.57	11.81
map04016	MAPK signaling pathway - plant	1.7368e-07	TRINITY_DN48230_c2_g10	K20716	-	8.60392	up	MAP3K4	MEKK [Handroanthus impetiginosus]	90.4	59.62	32.2	104.25	183.9	103.29	0.3	0.28	0.44	0.35	0.33	0.77	95.61	0.41
map04016	MAPK signaling pathway - plant	1.7368e-07	TRINITY_DN56318_c1_g5	K13413	EC:2.7.12.2	-3.20088	down	LSH3	protein LIGHT-DEPENDENT SHORT HYPOCOTYLS 4-like [Sesamum indicum]	0.81	0.43	0.17	0.23	0.06	0.03	2.96	3.97	3.77	4.29	8.85	4.84	0.29	4.78
map04016	MAPK signaling pathway - plant	1.7368e-07	TRINITY_DN49843_c1_g4	K17686	EC:3.6.3.54	-2.20835	down	HMA5	Cation transport ATPase [Handroanthus impetiginosus]	0.93	1.42	1.01	1.3	0.28	0.57	9.68	7.62	9.62	8.58	4.36	5.6	0.92	7.58
map04016	MAPK signaling pathway - plant	1.7368e-07	TRINITY_DN44499_c1_g4	K14497	EC:3.1.3.16	-1.36569	down	HAB2	Serine/threonine protein phosphatase [Handroanthus impetiginosus]	9.74	6.48	6.46	8.84	7.24	7.33	32.61	20.52	31.43	25.76	31.45	29.62	7.68	28.57
map04016	MAPK signaling pathway - plant	1.7368e-07	TRINITY_DN40929_c1_g1	K14497	EC:3.1.3.16	-1.54315	down	HAB1	protein phosphatase 2C 77-like [Olea europaea var. sylvestris]	8.62	4.89	2.87	6.83	7.48	4.15	37.98	21.06	22.85	28.73	31.99	33.26	5.81	29.31
map04016	MAPK signaling pathway - plant	1.7368e-07	TRINITY_DN40929_c1_g2	K14497	EC:3.1.3.16	3.41441	up	HAB1	probable protein phosphatase 2C 50 [Sesamum indicum]	6.32	27.3	30.64	9.42	23.96	25.83	4.51	1.82	3.47	2.85	3.32	4.45	20.58	3.4
map04016	MAPK signaling pathway - plant	1.7368e-07	TRINITY_DN56131_c1_g1	K20600	EC:2.7.11.24	2.00446	up	GSVIVT00026920001	PREDICTED: probable polygalacturonase isoform X1 [Populus euphratica]	0.61	0.96	0.1	0.33	0.36	0.98	0.16	0.32	0.36	0.21	0.4	0.17	0.56	0.27
map04016	MAPK signaling pathway - plant	1.7368e-07	TRINITY_DN40348_c2_g2	K02183	-	3.362	up	FUS5	Phospholipase/carboxyhydrolase [Handroanthus impetiginosus]	63.08	44.02	36.59	41.29	43.54	108.63	13.5	17.34	8.04	7.02	10.78	11.91	56.19	11.43
map04016	MAPK signaling pathway - plant	1.7368e-07	TRINITY_DN53466_c3_g8	K20558	-	-2.49536	down	FAMA	transcription factor FAMA isoform X3 [Sesamum indicum]	0.22	0.09	0.19	0.36	0.13	0.32	1.3	2.08	1.11	1.67	1.4	5.58	0.22	2.19
map04016	MAPK signaling pathway - plant	1.7368e-07	TRINITY_DN38693_c0_g2	K14509	EC:2.7.13.-	1.18248	up	ETR2	ethylene receptor 2 [Sesamum indicum]	2.74	6.4	4.02	0.72	2.14	2.26	2.06	0.79	2.93	2.22	7.15	2.23	3.05	2.9
map04016	MAPK signaling pathway - plant	1.7368e-07	TRINITY_DN52463_c0_g5	K14509	EC:2.7.13.-	-1.18026	down	ETR2	ethylene receptor isoform X1 [Jatropha curcas]	36.14	21.04	11.88	28.17	21.62	20.49	83	78.85	96.81	153.73	72.97	63.76	23.22	91.52
map04016	MAPK signaling pathway - plant	1.7368e-07	TRINITY_DN48169_c1_g5	K14509	EC:2.7.13.-	-1.43011	down	ETR1	PREDICTED: ethylene receptor 1 [Erythranthe guttata]	25.26	12.99	5.45	26.04	12.98	14.75	72.82	80.68	79.62	115.8	48.44	48.55	16.25	74.32
map04016	MAPK signaling pathway - plant	1.7368e-07	TRINITY_DN42613_c0_g11	K14516	-	7.19877	up	ERF1B	ethylene-responsive transcription factor 1B-like [Sesamum indicum]	22.46	33.85	11.82	2.05	28.51	28.24	0.19	0.13	0.06	0.38	0.71	0.06	21.15	0.26
map04016	MAPK signaling pathway - plant	1.7368e-07	TRINITY_DN42613_c0_g12	K14516	-	2.96726	up	ERF1B	ethylene-responsive transcription factor 1B-like [Sesamum indicum]	11.08	11.79	10.08	5.52	12.96	4.59	1.67	1.66	1.57	1.79	3.43	3.36	9.34	2.25
map04016	MAPK signaling pathway - plant	1.7368e-07	TRINITY_DN46064_c0_g5	K14516	-	2.15716	up	ERF1B	hypothetical protein CDL12_17260 [Handroanthus impetiginosus]	2.5	4.95	1.59	1.44	3.57	1.28	1.31	0.68	1.24	0.62	0.74	1.82	2.55	1.07
map04016	MAPK signaling pathway - plant	1.7368e-07	TRINITY_DN47060_c0_g1	K14516	-	5.65367	up	ERF095	ethylene-responsive transcription factor ERF096 [Sesamum indicum]	3.33	8.94	4.62	1.48	2.78	5.22	0.11	0	0.32	0.11	0.11	0.3	4.4	0.16
map04016	MAPK signaling pathway - plant	1.7368e-07	TRINITY_DN4531_c0_g1	K14516	-	5.28688	up	ERF091	ethylene-responsive transcription factor ERF091 [Sesamum indicum]	0.29	5.36	7.49	1.67	2.02	0.59	0.05	0.09	0.41	0.05	0.14	0.21	2.9	0.16
map04016	MAPK signaling pathway - plant	1.7368e-07	TRINITY_DN54945_c5_g4	K20718	EC:2.7.11.1	-1.53736	down	ERECTA	LRR receptor-like serine/threonine-protein kinase ERECTA [Sesamum indicum]	11.63	7.9	12.35	15.5	5.95	10.53	38.35	34.59	107.27	26.73	38.24	113.74	10.64	59.82
map04016	MAPK signaling pathway - plant	1.7368e-07	TRINITY_DN43294_c2_g3	K20729	-	-3.42601	down	EPF2	hypothetical protein CDL12_17070 [Handroanthus impetiginosus]	0.24	0.11	0	0	0.23	0.12	1.25	2.99	1.93	0.11	3.27	4.21	0.12	2.29
map04016	MAPK signaling pathway - plant	1.7368e-07	TRINITY_DN43015_c2_g6	K14514	-	3.95196	up	EIN3	protein ETHYLENE INSENSITIVE 3 [Sesamum indicum]	327.21	355.06	145.17	319.31	168.65	209.3	20.51	37.41	24.56	48.09	38.42	27.81	254.12	32.8
map04016	MAPK signaling pathway - plant	1.7368e-07	TRINITY_DN54103_c3_g3	K14514	-	4.05735	up	EIN3	protein ETHYLENE INSENSITIVE 3 [Sesamum indicum]	173.99	347.33	213.51	188.28	105.74	207.9	18.86	23.67	22.23	28.86	39.76	22.89	206.12	26.04
map04016	MAPK signaling pathway - plant	1.7368e-07	TRINITY_DN47345_c0_g1	K14513	-	-1.76953	down	EIN2	ethylene-insensitive protein 2 [Sesamum indicum]	4.69	4.34	3.85	6.84	5.25	5.64	19.4	19.31	20.96	27.74	25.51	21.47	5.1	22.4
map04016	MAPK signaling pathway - plant	1.7368e-07	TRINITY_DN45112_c3_g12	K14515	-	2.26021	up	EBF1	EIN3-binding F-box protein 1-like [Sesamum indicum]	6.91	14.1	26.44	6.02	14.35	22.24	6.72	7.75	6.92	8.14	5.54	5.54	15.01	6.77
map04016	MAPK signaling pathway - plant	1.7368e-07	TRINITY_DN39480_c0_g1	K02183	-	1.66054	up	dfr1	esterase C25G4.2 [Sesamum indicum]	12.52	7.7	2.47	36.58	31.64	21.62	10.77	6.27	5.69	4.85	2.22	14.85	18.75	7.44
map04016	MAPK signaling pathway - plant	1.7368e-07	TRINITY_DN47607_c0_g1	K14510	EC:2.7.11.1	1.56069	up	CTR1	serine/threonine-protein kinase CTR1 isoform X1 [Sesamum indicum]	2	4.03	4.2	1.53	12.03	12.2	3.52	2.3	1.72	1.72	2.07	3	6	2.39
map04016	MAPK signaling pathway - plant	1.7368e-07	TRINITY_DN47657_c1_g2	K14510	EC:2.7.11.1	1.1315	up	CTR1	Phytochrome [Trema orientale]	10.86	12.59	7.37	9.02	10.47	17.43	6.43	6.71	6.64	7.53	6.61	5.9	11.29	6.64
map04016	MAPK signaling pathway - plant	1.7368e-07	TRINITY_DN8140_c0_g1	K02183	-	7.72552	up	CML45	probable calcium-binding protein CML45 [Sesamum indicum]	29.32	28.2	38.76	14.43	32.56	28.51	0.04	0.04	0.26	0.22	0.22	0.73	28.63	0.25
map04016	MAPK signaling pathway - plant	1.7368e-07	TRINITY_DN55345_c0_g5	K02183	-	7.01282	up	CML37	squidulin [Sesamum indicum]	15.12	14.55	9.47	15.55	20.55	31.14	0.19	0.12	0.18	0.21	0.35	0.39	17.73	0.24
map04016	MAPK signaling pathway - plant	1.7368e-07	TRINITY_DN53512_c1_g5	K03781	EC:1.11.1.6	-1.46781	down	CAT1	catalase isozyme 3 isoform X3 [Sesamum indicum]	35.74	30.48	12.73	82.81	42.64	48.29	165.31	218.65	151.99	240.11	180.04	165.38	42.11	186.91
map04016	MAPK signaling pathway - plant	1.7368e-07	TRINITY_DN53512_c1_g6	K03781	EC:1.11.1.6	-1.10964	down	CAT1	catalase isozyme 3 isoform X3 [Sesamum indicum]	13.61	5.16	4.34	6.96	34.91	10.85	58.36	31.31	38.92	70.1	38.32	39.57	12.64	46.1
map04016	MAPK signaling pathway - plant	1.7368e-07	TRINITY_DN44261_c1_g1	K02183	-	1.09297	up	CAM-1	unnamed protein product [Brassica rapa]	40.37	64.88	88.31	47.64	56.24	69.23	48.49	67.94	81.38	47.62	48.5	118.66	61.11	68.77
map04016	MAPK signaling pathway - plant	1.7368e-07	TRINITY_DN51432_c0_g5	K02183	-	2.12074	up	CAM-1	PREDICTED: LOW QUALITY PROTEIN: UPF0483 protein AGAP003155-like [Erythranthe guttata]	9.35	14.63	12.6	13.09	9.61	14.53	5.1	4.11	4.89	3.9	6.05	7.65	12.3	5.28
map04016	MAPK signaling pathway - plant	1.7368e-07	TRINITY_DN54255_c2_g8	K02183	-	2.08256	up	CAM-1	hypothetical protein B296_00027279 [Ensete ventricosum]	48.57	58.44	75.6	33.93	61.84	73	54.49	80.25	78.78	60.71	50.45	78.4	58.56	67.18
map04016	MAPK signaling pathway - plant	1.7368e-07	TRINITY_DN47387_c0_g4	K02183	-	-5.11672	down	Calml3	RecName: Full=Calmodulin; Short=CaM	0.14	0.07	0	0	0	0	4.03	3.63	3.7	2.93	0	0	0.04	2.38
map04016	MAPK signaling pathway - plant	1.7368e-07	TRINITY_DN44261_c1_g7	K02183	-	1.50799	up	CALM	unknown [Zea mays]	4.8	3.63	5.32	4.4	4.24	3.92	2.43	2.54	1.89	2.35	3.69	4.24	4.39	2.86
map04016	MAPK signaling pathway - plant	1.7368e-07	TRINITY_DN50520_c1_g5	K02183	-	1.61508	up	CALM	unknown [Zea mays]	3.47	3.66	4.24	3.88	3.32	3.12	2.21	2.18	2.03	1.38	2.81	2.7	3.62	2.22
map04016	MAPK signaling pathway - plant	1.7368e-07	TRINITY_DN51432_c0_g1	K02183	-	1.50116	up	CALM	calmodulin 5 [Tradescantia hirsutiflora]	10.6	10.23	9.23	10.18	9.99	7.94	6.87	4.78	5.72	3.28	8.27	8.76	9.69	6.28
map04016	MAPK signaling pathway - plant	1.7368e-07	TRINITY_DN49522_c1_g10	K13422	-	-3.46383	down	BHLH93	hypothetical protein CDL12_17330 [Handroanthus impetiginosus]	0	0.05	0.17	0	0.05	0.17	0.83	0.57	2.29	0.1	0.05	6.31	0.07	1.69
map04016	MAPK signaling pathway - plant	1.7368e-07	TRINITY_DN44224_c3_g2	K13422	-	-2.57854	down	BHLH30	transcription factor bHLH30 [Sesamum indicum]	0.16	0.41	0.31	0.55	0.05	0.22	3.4	2.54	5.73	1.84	0.97	4.57	0.28	3.18
map04016	MAPK signaling pathway - plant	1.7368e-07	TRINITY_DN44224_c3_g5	K13422	-	-3.13467	down	BHLH30	hypothetical protein CDL12_03596 [Handroanthus impetiginosus]	0.38	0.12	0.13	0.44	0.06	0.19	3.27	2.42	5.47	3.9	1.72	3.83	0.22	3.44
map04016	MAPK signaling pathway - plant	1.7368e-07	TRINITY_DN30278_c0_g1	K13422	-	-1.59874	down	BHLH3	transcription factor bHLH3-like [Sesamum indicum]	2.29	2.05	3	1.91	1.46	3.19	12.42	12.72	16.83	13.69	11.29	14.64	2.32	13.6
map04016	MAPK signaling pathway - plant	1.7368e-07	TRINITY_DN44178_c0_g2	K13422	-	1.98775	up	BHLH13	bHLH1 protein [Tectona grandis]	6.57	12.3	15.7	4.11	12.48	20.26	6.57	5.04	5.83	5.22	6.39	5.5	11.9	5.76
map04016	MAPK signaling pathway - plant	1.7368e-07	TRINITY_DN44178_c0_g3	K13422	-	-1.26679	down	BHLH13	bHLH1 protein [Tectona grandis]	0.78	0.62	0.77	0.46	1	1.16	4.77	3.66	6.07	2.79	0.89	2.71	0.8	3.48
map04016	MAPK signaling pathway - plant	1.7368e-07	TRINITY_DN52928_c0_g7	K13420	EC:2.7.11.1	7.71187	up	At2g24130	putative leucine-rich repeat receptor-like serine/threonine-protein kinase At2g24130 [Olea europaea var. sylvestris]	0.35	3.42	6.59	0.06	0.2	0.21	0	0	0	0	0	0.06	1.8	0.01
map04016	MAPK signaling pathway - plant	1.7368e-07	TRINITY_DN41104_c0_g15	K20728	-	5.18913	up	APS1	Acid phosphatase [Handroanthus impetiginosus]	10.59	20.3	25.68	25.25	17.88	24.85	1.23	1.26	2.04	0.78	1.34	3.26	20.76	1.65
map04016	MAPK signaling pathway - plant	1.7368e-07	TRINITY_DN47138_c1_g3	K20728	-	-1.24275	down	APS1	Acid phosphatase [Handroanthus impetiginosus]	2.5	1.19	0.75	3.4	4.34	3.62	11.49	7.47	11.82	11.65	8.91	11.19	2.63	10.42
map04016	MAPK signaling pathway - plant	1.7368e-07	TRINITY_DN34628_c0_g1	K20772	EC:4.4.1.14	7.96813	up	ACS1	1-aminocyclopropane-1-carboxylate synthase [Sesamum indicum]	17.04	35.07	16.03	2.07	11.72	11.68	0.1	0.04	0.02	0.04	0.33	0.21	15.6	0.12
map04016	MAPK signaling pathway - plant	1.7368e-07	TRINITY_DN39970_c0_g13	K20557	-	3.39296	up	-	hypothetical protein B456_009G285000 [Gossypium raimondii]	3.53	3.25	0.9	7.68	4.46	10.02	0.17	0.5	0.5	1.68	0.55	1.34	4.97	0.79
map04016	MAPK signaling pathway - plant	1.7368e-07	TRINITY_DN39970_c0_g4	K20557	-	3.97038	up	-	PREDICTED: transcription factor VIP1-like [Erythranthe guttata]	7.22	4.04	3.11	16.19	5.71	29.69	0.95	1.72	0.23	1.56	2	0.48	10.99	1.16
map04016	MAPK signaling pathway - plant	1.7368e-07	TRINITY_DN39970_c0_g9	K20557	-	1.96817	up	-	hypothetical protein CDL12_29067 [Handroanthus impetiginosus]	7.34	5.7	3.96	6.05	7.18	16.73	3.46	2.47	4.24	2.33	4.69	3.64	7.83	3.47
map04016	MAPK signaling pathway - plant	1.7368e-07	TRINITY_DN40748_c2_g8	K13420	EC:2.7.11.1	2.09272	up	-	uncharacterized protein LOC112328334 [Populus trichocarpa]	2.28	3.25	0.91	4.68	0.48	0.78	1.45	0.25	0.42	0.42	1.94	0.64	2.06	0.85
map04016	MAPK signaling pathway - plant	1.7368e-07	TRINITY_DN41472_c3_g4	K03781	EC:1.11.1.6	-2.91635	down	-	truncated catalase 2 [Avicennia marina]	420.94	171.9	75.72	422.06	215.39	149.31	2929.78	3019.96	2875.31	3115.52	4619.26	2448.18	242.55	3168
map04016	MAPK signaling pathway - plant	1.7368e-07	TRINITY_DN44700_c2_g8	K02183	-	1.81374	up	-	hypothetical protein MIMGU_mgv1a016982mg [Erythranthe guttata]	205.9	228.14	99.9	239.35	83.69	125.07	97.3	144.16	36.51	66.5	98.24	43.46	163.67	81.03
map04016	MAPK signaling pathway - plant	1.7368e-07	TRINITY_DN45936_c1_g10	K20603	EC:2.7.12.2	2.49942	up	-	Mitogen-activated protein kinase kinase [Handroanthus impetiginosus]	1.62	1.66	0.68	1.86	3.48	7.14	0.59	1.08	0.31	1.22	1.22	0.29	2.74	0.79
map04016	MAPK signaling pathway - plant	1.7368e-07	TRINITY_DN48060_c0_g1	K02183	-	2.88049	up	-	UGT4 [Pueraria montana var. lobata]	94.48	121.86	122.08	141.64	121.77	133.54	82.49	90.51	109.05	76.86	129.12	120.25	122.56	101.38
map04016	MAPK signaling pathway - plant	1.7368e-07	TRINITY_DN49256_c1_g1	K00940	EC:2.7.4.6	1.2163	up	-	uncharacterized protein LOC105179150 [Sesamum indicum]	38.44	26.96	20.71	47.82	39.28	38.03	29.94	27.02	30.77	38.3	33.58	34.53	35.21	32.36
map04016	MAPK signaling pathway - plant	1.7368e-07	TRINITY_DN49923_c1_g1	K20725	-	4.84009	up	-	protein MKS1 [Sesamum indicum]	4.93	19.08	16.41	14.28	21.82	17.39	1.19	1.03	0.42	0.91	1.21	1.34	15.65	1.02
map04016	MAPK signaling pathway - plant	1.7368e-07	TRINITY_DN53619_c0_g1	K13420	EC:2.7.11.1	2.47607	up	-	Leucine-rich repeat protein [Handroanthus impetiginosus]	19.96	51.23	93.09	64	25.14	40.78	22.85	15.08	8.93	22.14	23.87	31.02	49.03	20.65
map04016	MAPK signaling pathway - plant	1.7368e-07	TRINITY_DN54375_c1_g2	K02183	-	1.75653	up	-	Calmodulin and related proteins (EF-Hand superfamily) [Handroanthus impetiginosus]	7.05	14.96	43.18	9.73	6.31	14.89	13.97	9.57	12.77	8.58	5.5	11.15	16.02	10.26
