# Supplementary material for: Comparative Transcriptomics and Metabolomics Analyses of Avicennia marina and Kandelia obovata under Chilling Stress during Seedling Stage
Source: Int J Mol Sci. 2023 Nov 30;24(23):16989. doi: 10.3390/ijms242316989 (PMC10707264; doi:10.3390/ijms242316989)
Supplement: Supplementary file 1 [file ijms-24-16989-s001.zip › Table S7.xlsx]

## Sheet: K.obovata
id	compound name	NAME_CH	CAS	KEGG_ID	FORMULA	EXACT_MASS	CLASS_EN	CLASS_CH	Q1	Q3	ionmode	rt	MEAN Ko_CS	MEAN Ko_CK	VIP	P-VALUE	Q-VALUE	FOLD CHANGE	LOG_FOLDCHANGE
9	Hesperidin	橙皮苷	520-26-3	C09755	C28H34O15	610.19	flavonoids	类黄酮	609	300.8	-	6.65	7.64409e-05	0.000140656	2.05309	0.00415579	0.162778	0.54346	-0.879755
10	Neohesperidin	新橙皮苷	13241-33-3	C09806	C28H34O15	610.19	flavonoids	类黄酮	609	300.8	-	6.83	7.70895e-05	0.000130439	1.89809	0.0241443	0.319874	0.590999	-0.758772
11	Narcissoside	水仙苷	604-80-8		C28H32O16	624.169	flavonoids	类黄酮	622.9	314.9	-	6.38	0.0525957	0.07416	1.64891	0.0376091	0.378746	0.709219	-0.495698
18	4-Aminobutyric acid	4-氨基丁酸	56-12-2	C00334	C4H9NO2	103.063	amino acids	氨基酸	104.1	87.1	+	0.66	0.000520667	0.000157345	2.2479	0.0115601	0.24303	3.30908	1.72643
22	5-Hydroxylysine	5-羟基赖氨酸	1190-94-9	C16741	C6H14N2O3	162.1	amino acids	氨基酸	163.1	128	+	0.55	1.10213e-05	1.66422e-05	1.7661	0.0278793	0.338413	0.662251	-0.59455
78	Proline;L-Proline	脯氨酸;L-脯氨酸	147-85-3	C00148	C5H9NO2	115.063	Amino acid and derivatives;amino acids	氨基酸及其衍生物;氨基酸	116.1	70.1	+	0.73	0.00707445	0.00205506	2.5963	4.1433e-05	0.00720711	3.44245	1.78344
83	L-Ornithine	L-鸟氨酸	70-26-8	C01602;C00077	C5H12N2O2	132.09	Amino acid and derivatives;amino acids	氨基酸及其衍生物;氨基酸	133.1	70.1	+	0.55	0.000244158	2.2248e-05	2.2939	0.0156951	0.269738	10.9744	3.45607
84	L-Aspartic acid	L-天门冬氨酸	56-84-8	C00049	C4H7NO4	133.038	Amino acid and derivatives;amino acids	氨基酸及其衍生物;氨基酸	134	74	+	0.63	0.00105496	0.00157087	2.04005	0.00567044	0.182658	0.67158	-0.574369
87	L-Histidine	L-组氨酸	71-00-1	C00135	C6H9N3O2	155.069	Amino acid and derivatives;amino acids	氨基酸及其衍生物;氨基酸	156.1	110.1	+	0.59	0.000309633	0.000124769	2.49133	5.66201e-05	0.00820737	2.48165	1.3113
90	DL-Alanine;L-Alanine	DL-丙氨酸;L-丙氨酸	302-72-7;56-41-7	C01401;C00041	C3H7NO2	89.0477	Alkaloids;Amino acid and derivatives;amino acids	生物碱;氨基酸及其衍生物;氨基酸	90.1	44	+	0.64	0.000791466	0.000124812	2.29565	0.0129406	0.25157	6.34129	2.66478
111	D-(-)-Quinic acid	D-(-)-奎宁酸	77-95-2	C00296	C7H12O6	192.063	Quinolines and derivatives	奎宁酸及其衍生物	191.1	85	-	3.95	0.000174572	0.000110007	1.99224	0.0110806	0.239728	1.58692	0.666227
112	Sebacic acid	癸二酸	111-20-6	C08277	C10H18O4	202.121	Organic acids	有机酸及其衍生物	201.1	139.1	-	9.56	3.71544e-06	2.89252e-06	1.66869	0.0386888	0.38239	1.2845	0.361205
127	Salidroside	红景天苷	10338-51-9	C06046	C14H20O7	300.121	Phenols	酚类	299.1	59	-	4.18	5.2063e-06	1.91571e-05	1.9111	0.00539508	0.179586	0.271769	-1.87955
132	O-Phosphorylethanolamine	磷酸乙醇胺	1071-23-4	C00346	C2H8NO4P	141.019	Miscellaneous	其他类型	140	79	-	0.69	1.23817e-05	8.30034e-05	2.02541	0.0041896	0.163315	0.149171	-2.74496
153	D-Maltose	D-麦芽糖	69-79-4	C00208	C12H22O11	342.116	Carbohydrates	糖类	341.1	59	-	0.76	0.04823	0.0296396	2.37969	0.000352993	0.034581	1.62721	0.702403
164	4-Hydroxybenzoic acid	4-羟基苯甲酸	99-96-7	C00156	C7H6O3	138.032	Phenols	酚类	137	93	-	1.08	5.79842e-05	0.000103727	2.25047	0.00838465	0.216891	0.559011	-0.839052
171	Pyrophosphate		2466-09-3	C00013	H4O7P2	177.943	Non-metal oxoanionic compounds	非金属氧阴离子化合物	176.9	79	-	4.97	2.66579e-05	5.90428e-06	1.67574	0.0415442	0.391406	4.51501	2.17473
177	Sedoheptulose		3019-74-7	C02076;C08355	C7H14O7	210.074	Organooxygen compounds	有机氧化合物	209.1	59	-	3.97	0.000233474	0.000100258	1.86301	0.0345162	0.3675	2.32874	1.21955
178	L-Tyrosine	L-酪氨酸	60-18-4	C00082	C9H11NO3	181.074	Amino acid and derivatives	氨基酸及其衍生物	180.1	72	-	1.93	3.36009e-05	1.52108e-06	1.83545	0.00724107	0.20426	22.0901	4.46533
180	Taxifolin;Dihydroquercetin (Taxifolin)	花旗松素;紫杉叶素	480-18-2	C01617	C15H12O7	304.058	Flavonoids	黄酮	303.1	125	-	6.34	0.000119548	2.39793e-05	1.40754	0.0233188	0.31565	4.98545	2.31772
184	Uridine 5'-monophosphate	5-尿嘧啶核苷酸(5-UMP)	58-97-9	C00105	C9H13N2O9P	324.036	Nucleotide and its derivates	核苷酸及其衍生物	323	79	-	1.39	9.41449e-05	0.000228574	2.27041	0.000119588	0.0148585	0.41188	-1.2797
186	Tiglic acid	惕格酸	80-59-1	C08279	C5H8O2	100.052	Miscellaneous	其他类型	99	82	-	1.11	0.00113537	0.00405056	2.06918	0.0318009	0.35651	0.2803	-1.83496
188	Uridine 5'-diphospho-D-glucose;UDP-D-galactose;Uridine diphosphategalactose	尿苷 5'-二磷酸葡萄糖	133-89-1;2956-16-3	C00029;C00052	C15H24N2O17P2	566.055	Nucleotide and its derivates;Pyrimidine nucleotides	核苷酸及其衍生物;嘧啶核苷类	565	323	-	0.71	0.00079707	0.00224653	1.91626	0.0408384	0.389257	0.354801	-1.49492
190	Saccharate;D-Glucaric acid;Galactaric acid		87-73-0;526-99-8	C00818;C00879	C6H10O8	210.038	Organooxygen compounds	有机氧化合物	209	85	-	3.66	0.000965556	0.000213381	2.26773	0.0135946	0.255182	4.52502	2.17793
214	Acetovanillone	香草乙酮	498-02-2	C11380	C9H10O3	166.063	Phenols	酚类	167.1	43	+	5.24	5.67681e-05	0.000116118	1.94314	0.00821643	0.215166	0.488884	-1.03244
220	5-Aminovaleric acid	5-氨基戊酸	660-88-8	C00431	C5H11NO2	117.079	Amino acid and derivatives	氨基酸及其衍生物	118.1	55.1	+	1.11	0.00145569	0.000238391	2.68193	0.000505936	0.0435303	6.10634	2.61031
223	D-Proline		344-25-2	C00763	C5H9NO2	115.063	Carboxylic acids and derivatives	羧酸类及其衍生物	116.1	70.1	+	0.76	0.00707445	0.00205506	2.5963	4.1433e-05	0.00720711	3.44245	1.78344
241	Styrene-cis-2,3-dihydrodiol			C07084	C8H10O2	138.068			139.1	39	+	5.12	0.000192754	4.91401e-05	2.26528	0.0259115	0.328339	3.92253	1.97179
278	1,2,5,6-Tetrahydro-4H-pyrrolo[3,2,1-ij]quinolin-4-one		57369-32-1	C18487	C11H11NO	173.084	Quinolines and derivatives	奎宁酸及其衍生物	174.1	146.1	+	10.56	1.95229e-05	3.24974e-05	1.58092	0.0412112	0.390398	0.600752	-0.735159
293	8-Amino-7-oxononanoic acid	8-氨基-7-氧代壬酸	4707-58-8	C01092	C9H17NO3	187.121	Alkaloids	生物碱	188.1	109.1	+	1.51	5.79447e-06	2.59916e-06	1.78743	0.0208046	0.301574	2.22937	1.15663
294	2-Keto-6-acetamidocaproate			C05548	C8H13NO4	187.084	Keto acids and derivatives	酮酸及其衍生物	188.1	100.1	+	1.48	2.61001e-05	3.43875e-05	1.61378	0.0360963	0.373402	0.759002	-0.397825
298	Kynurenic acid	犬尿喹啉酸	492-27-3	C01717	C10H7NO3	189.043	Alkaloids	生物碱	190	144	+	4.36	0.000141002	0.000253377	2.16058	0.00411554	0.162132	0.556492	-0.845568
310	Flavone	黄酮	525-82-6	C15608;C10043	C15H10O2	222.068	Flavonoids	黄酮	223.1	77	+	4.13	1.90042e-05	4.04816e-05	2.01281	0.0140716	0.257663	0.469454	-1.09094
324	4',7-Isoflavandiol	雌马酚	531-95-3	C14131	C15H14O3	242.094	Flavonoids	黄酮	243.1	123	+	11.35	4.16961e-05	2.21472e-05	1.96482	0.0109809	0.239017	1.88268	0.912787
345	Glycinol	Glycinol	69393-95-9	C01263	C15H12O5	272.068	Flavonoids	黄酮	273.1	95	+	6.55	2.26064e-05	1.26511e-05	2.18477	0.00549851	0.180764	1.78692	0.837472
418	3-Methylsalicylaldehyde	3-甲基水杨醛	824-42-0	C14087	C8H8O2	136.052			137.1	119	+	10.56	3.69035e-05	2.14792e-05	1.88699	0.028251	0.340256	1.7181	0.780815
435	S-Lactoylglutathione		41656-56-8	C03451	C13H21N3O8S	379.105	Carboxylic acids and derivatives	羧酸类及其衍生物	380.1	262.1	+	4.09	3.87834e-06	2.25539e-06	1.49691	0.0454776	0.402529	1.71958	0.78206
450	Maltotriose		1109-28-0	C01835	C18H32O16	504.169	Organooxygen compounds	有机氧化合物	527.2	365.1	+	1.23	8.96257e-05	4.68403e-05	1.65068	0.0377477	0.379221	1.91343	0.936161
452	Physalin A	酸浆苦味A	23027-91-0		C28H30O10	526.184	Steroids and steroid derivatives	甾体及其衍生物	527.2	509.2	+	12.1	6.40313e-05	0.000207423	2.52666	0.00522472	0.177581	0.3087	-1.69572
453	Physalin G	酸浆苦味素G	76045-38-0		C28H30O10	526.184	Steroids and steroid derivatives	甾体及其衍生物	527.2	509.2	+	12.17	6.24219e-05	0.000197339	2.58301	0.00528523	0.178303	0.316318	-1.66055
477	Geniposide	京尼平甙	24512-63-8	C09781	C17H24O10	388.137	Iridoids	环烯醚萜	389.1	209.1	+	5.14	6.0087e-05	0.000120927	2.1452	0.00251433	0.128576	0.496885	-1.00902
490	N-Acetyl-5-hydroxytryptamine	N-乙酰基五羟色胺	1210-83-9	C00978	C12H14N2O2	218.106	Tryptamine derivatives	色胺及其衍生物	219.1	160.1	+	11.12	1.90685e-05	2.74952e-05	1.65187	0.0389684	0.383312	0.693522	-0.527987
532	Cinnamaldehyde	肉桂醛	14371-10-9;104-55-2	C00903	C9H8O	132.058	Phenylpropanoids	苯丙素	133.1	55	+	6.34	2.61088e-05	1.57467e-05	1.59042	0.046466	0.405116	1.65805	0.72949
557	Aloperine	苦豆碱	56293-29-9	C10748	C15H24N2	232.194	Alkaloids	生物碱	233.2	174.1	+	7.22	8.98657e-06	1.3604e-05	1.72917	0.0302472	0.349681	0.660584	-0.598186
562	Bufalin	蟾毒灵	465-21-4	C16922	C24H34O4	386.246	Steroids and steroid derivatives	甾体及其衍生物	387.3	107.1	+	5.05	0.000199763	0.000580163	1.14096	0.0348386	0.368732	0.344322	-1.53817
564	Chimonanthine	山腊梅碱	5545-89-1	C09133	C22H26N4	346.216	Alkaloids	生物碱	347.2	331.2	+	9.43	3.5562e-05	9.37142e-07	1.736	0.0471764	0.406927	37.9473	5.24592
591	Methyl caffeate acid	咖啡酸甲酯	3843-74-1	C10477	C10H10O4	194.058	Phenylpropanoids	苯丙素	195.1	121	+	4.6	0.00012324	6.32998e-05	2.12795	0.00912713	0.224026	1.94692	0.961194
592	Kakuol	卡枯醇	18607-90-4	C16982	C10H10O4	194.058	Phenols	酚类	195.1	57	+	4.58	5.16438e-05	2.9758e-05	1.74684	0.0495988	0.412825	1.73546	0.795319
595	Butyl 4-Hydroxybenzoate	对羟基苯甲酸丁酯	94-26-8		C11H14O3	194.094	Lignans	木脂素	195.1	57.1	+	4.56	5.16438e-05	2.96937e-05	1.75237	0.0489115	0.411194	1.73922	0.798437
632	D-Aspartic acid	D-天门冬氨酸	1783-96-6	C00402	C4H7NO4	133.038	Alkaloids	生物碱	134	74	+	0.76	0.0010901	0.00154864	1.96052	0.0105684	0.235983	0.703907	-0.506543
640	3-Methoxy-4,5-methylenedioxycinnamaldehyde	3-甲氧基-4,5-亚甲基二氧基肉桂醛	74683-19-5		C11H10O4	206.058	Phenylpropanoids	苯丙素	207.1	189.1	+	5.04	0.000117904	6.41419e-05	1.73277	0.0256005	0.326903	1.83818	0.878275
655	Cleomiscosin A	黄花菜木脂素A	76948-72-6	C09922	C20H18O8	386.1	Coumarins	香豆素	387.1	137.1	+	5.74	0.000217854	0.000383519	1.98265	0.0102452	0.233494	0.568039	-0.815939
656	Pinoresinol dimethyl ether	松脂素二甲醚	29106-36-3	C10561	C22H26O6	386.173	Lignans	木脂素	387.2	121.1	+	5.15	0.00027602	0.000473822	1.8456	0.0135916	0.255166	0.582539	-0.779573
679	Ganoderic acid H	灵芝酸H	98665-19-1		C32H44O9	572.299	Triterpenoids	三萜	573.3	555.3	+	11.73	0.000122091	0.000351899	2.14124	0.00312167	0.143419	0.34695	-1.5272
686	Kaempferitrin	山奈苷	482-38-2	C16981	C27H30O14	578.164	Flavonoids	黄酮	579.2	415.1	+	5.69	4.81456e-06	9.47301e-06	1.35629	0.0128242	0.2509	0.508239	-0.976421
687	Daidzein-4',7-diglucoside	大豆苷元-4',7-二葡萄糖苷	53681-67-7		C27H30O14	578.164	Flavonoids	黄酮	579.2	399.1	+	5.94	3.31647e-05	1.35319e-05	1.8766	0.0408124	0.389177	2.45086	1.29329
689	Calystegine B2	Calystegine B2	127414-85-1	C10851	C7H13NO4	175.084	Alkaloids	生物碱	176.1	158.1	+	2.95	5.40771e-06	1.21742e-05	1.74829	0.0245249	0.321762	0.444194	-1.17074
697	Benzoin	安息香	119-53-9	C01408	C14H12O2	212.084	Stilbenes	芪类	213.1	105	+	4.67	1.15062e-05	5.78125e-06	1.33782	0.0222001	0.309624	1.99026	0.992958
703	Isodiospyrin	异柿醌	20175-84-2	C10358	C22H14O6	374.079	Quinones	其他醌类	375.1	357.1	+	11.28	1.99789e-05	3.18401e-05	1.59081	0.0349433	0.369129	0.627477	-0.672365
722	Isovitexin	异牡荆黄素	38953-85-4	C01714	C21H20O10	432.106	Flavonoids	黄酮	433.1	415.1	+	5.85	3.06843e-05	8.25967e-06	1.9911	0.0142773	0.258697	3.71496	1.89335
728	Hinokiflavone	日本扁柏黄酮	19202-36-9	C10057	C30H18O10	538.09	Flavonoids	黄酮	539.1	521.1	+	11.93	5.40688e-05	0.000329591	2.39792	0.0192602	0.293055	0.164048	-2.60781
729	3,8'-Biapigenin	3,8''-联芹菜甙元	101140-06-1		C30H18O10	538.09	Flavonoids	黄酮	539.1	521.1	+	11.92	5.40688e-05	0.000329591	2.39792	0.0192602	0.293055	0.164048	-2.60781
739	Quercetin-3-O-sophoroside	槲皮素-3-O-槐二糖苷	18609-17-1	C12667	C27H30O17	626.148	Flavonoids	黄酮	627.2	303.1	+	6.24	6.51608e-05	0.000243006	2.33867	0.0123137	0.247857	0.268144	-1.89892
753	Methyl hesperidin	甲基橙皮甙	11013-97-1	C17393	C29H36O15	624.205	Flavonoids	黄酮	625.2	317.1	+	12.99	3.73023e-05	7.72061e-05	1.79769	0.0240617	0.31946	0.483152	-1.04945
807	Hydrangenol	绣球酚	480-47-7	C10262	C15H12O4	256.074	Flavonoids	黄酮	257.1	105	+	11.31	7.18847e-05	0.000147747	2.21703	0.00866383	0.219662	0.48654	-1.03937
809	1-(alpha-Methyl-4-(2-methylpropyl)benzeneacetate)-beta-D-Glucopyranuronic acid		115075-59-7	C03033	C19H26O8	382.163	Organooxygen compounds	有机氧化合物	383.2	189.1	+	12.18	7.06412e-05	0.000130737	1.90264	0.019243	0.292955	0.540332	-0.888081
810	Physalin D	酸浆苦味D	54980-22-2		C28H32O11	544.194	Steroids and steroid derivatives	甾体及其衍生物	545.2	527.2	+	12.1	0.000711329	0.00197354	1.7351	0.0473038	0.407248	0.360433	-1.4722
811	Tetrahydroaldosterone-3-glucuronide		20605-81-6	C03033	C27H40O11	540.257	Organooxygen compounds	有机氧化合物	541.3	347.2	+	0.72	0.00182709	0.00310539	1.77546	0.0199253	0.296825	0.58836	-0.76523
812	Oleuroside	Oleuroside	116383-31-4		C25H32O13	540.184	Iridoids	环烯醚萜	541.2	137.1	+	12.73	2.05349e-05	7.05978e-05	2.4292	0.00261744	0.131328	0.290872	-1.78154
842	Calystegine A7	Calystegine A7	197565-90-5		C7H13NO3	159.09	Alkaloids	生物碱	160.1	142.1	+	2.61	4.19645e-06	9.24889e-06	1.95945	0.0205937	0.300458	0.453725	-1.14011
850	Cyanidin-3-O-rutinoside chloride	氯化失车菊素-3-O-芸香糖苷	18719-76-1	C04491	C27H31ClO15	630.135	Flavonoids	黄酮	631.1	137	+	13.55	8.04036e-06	1.85939e-05	1.44857	0.0197616	0.295911	0.432419	-1.2095
853	7-(4-Hydroxyphenyl)-1-phenyl-4-hepten-3-one	7-(4-羟苯基)-1-苯基-4-庚烯-3-酮	100667-52-5		C19H20O2	280.146	Phenols	酚类	281.2	105.1	+	12.53	0.000612628	0.0008848	1.82008	0.034384	0.36699	0.692391	-0.530341
857	Denudatine	光翠雀碱； 裸翠雀亭	26166-37-0	C08680	C22H33NO2	343.251	Alkaloids	生物碱	344.3	326.2	+	1.59	8.21997e-05	0.000175212	1.59884	0.00399893	0.160217	0.469144	-1.0919
865	Schisantherin A	五味子酯甲	58546-56-8	C10881	C30H32O9	536.205	Lignans	木脂素	537.2	105	+	12.25	9.67944e-06	3.01443e-05	1.6842	0.0050252	0.175123	0.321104	-1.63889
873	Ginsenoside F2	人参皂苷F2	62025-49-4		C42H72O13	784.497	Triterpenoids	三萜	785.5	605.4	+	12.15	8.44719e-05	0.000276066	2.02576	0.0342363	0.366419	0.305985	-1.70847
879	trans-3,5-Dimethoxy-4-hydroxy cinnamaldehydee	反-3,5-二甲氧基-4-羟基肉桂醛	4206-58-0	C05610	C11H12O4	208.074	Phenylpropanoids	苯丙素	209.1	55	+	5.17	0.000132048	0.000181331	1.65267	0.0468906	0.406203	0.728217	-0.457559
900	Anacrotine	美洲野百合碱	5096-49-1	C10277	C18H25NO6	351.168	Alkaloids	生物碱	352.2	334.2	+	9.55	4.77271e-06	1.08744e-06	2.06528	0.0066342	0.196582	4.38893	2.13387
908	Cardanol (C15:1)	腰果酚(C15:1)	501-26-8	C10785	C21H34O	302.261	Phenols	酚类	303.3	107	+	12.69	8.02326e-05	5.30154e-05	1.64419	0.0436253	0.397464	1.51338	0.597776
924	Yatein	亚太因	40456-50-6	C10557	C22H24O7	400.152	Lignans	木脂素	401.2	161.1	+	12.6	3.27979e-05	5.25471e-05	1.78243	0.0207198	0.301127	0.624162	-0.680007
940	Jujuboside D	酸枣仁皂苷D	194851-84-8		C58H94O26	1206.6	Triterpenoids	三萜	1207.6	1189.6	+	12.95	2.63272e-05	1.13467e-05	1.8947	0.00831815	0.216214	2.32025	1.21428
944	Ganoderenic acid E	灵芝烯酸E	110241-23-1		C30H40O8	528.272	Triterpenoids	三萜	529.3	493.3	+	12.79	2.2238e-05	5.43346e-05	1.9209	0.0221224	0.309191	0.409279	-1.28884
945	Vitamin A	维生素A	68-26-8;11103-57-4	C00473	C20H30O	286.23	Vitamins	维生素类	269.2	93.1	+	9.86	7.72582e-06	1.70005e-05	2.20538	0.0166014	0.27622	0.454445	-1.13782
947	Inosine	肌苷	58-63-9	C00294	C10H12N4O5	268.081	Nucleotide and its derivates	核苷酸及其衍生物	269.1	137	+	2.6	0.00273118	0.00144093	1.67888	0.0490152	0.411442	1.89543	0.922526
954	Mulberrofuran Q	桑呋喃Q	101383-35-1		C34H24O10	592.137	Phenols	酚类	593.1	575.1	+	13.28	0.00167495	0.000538786	2.4624	9.76634e-06	0.00416079	3.10875	1.63633
963	Ginsenoside F3	人参皂苷F3	62025-50-7		C41H70O13	770.482	Triterpenoids	三萜	771.5	735.5	+	12.32	8.02243e-05	0.00126757	2.5465	0.00456067	0.168887	0.06329	-3.98188
990	1,7-Diphenyl-4-hepten-3-one	1,7-二苯基-4-庚烯-3-酮	79559-59-4		C19H20O	264.151	Phenols	酚类	265.2	105.1	+	5.9	1.51654e-05	7.42221e-06	1.97531	0.00727839	0.204708	2.04325	1.03086
992	L-Norleucine	L-正亮氨酸	327-57-1	C01933	C6H13NO2	131.095	Amino acid and derivatives	氨基酸及其衍生物	132.1	86.1	+	1.81	0.000218863	5.04162e-05	2.61849	1.4352e-05	0.00416079	4.34112	2.11807
993	Isoleucine	异亮氨酸	443-79-8	C16434;C06418	C6H13NO2	131.095	Amino acid and derivatives	氨基酸及其衍生物	132.1	86.1	+	1.8	0.000218863	5.04162e-05	2.61849	1.4352e-05	0.00416079	4.34112	2.11807
994	6-Aminocaproic acid	6-氨基己酸	60-32-2	C02378	C6H13NO2	131.095	Fatty Acyls	脂肪酰类	132.1	41	+	1.84	0.000306366	6.87138e-05	2.60831	0.000529803	0.044734	4.45858	2.15658
1007	Pyridoxamine 5'-phosphate		529-96-4	C00647	C8H13N2O5P	248.056	Pyridines and derivatives	吡啶及其衍生物	249.1	134.1	+	3.51	1.78052e-05	3.52706e-05	1.87588	0.00207292	0.115493	0.504816	-0.986171
1009	Pterosin D	蕨素D	34169-70-5		C15H20O3	248.141	Sesquiterpenoids	倍半萜	249.1	231.1	+	3.29	1.7026e-05	1.05923e-05	1.81302	0.0456166	0.402898	1.6074	0.684726
1011	6-Hydroxymelatonin	6-羟基褪黑素	2208-41-5	C05643	C13H16N2O3	248.116	Tryptamine derivatives	色胺及其衍生物	249.1	190.1	+	5.76	4.43818e-06	1.3416e-05	2.01426	0.0115169	0.24274	0.330812	-1.59591
1012	Nicotinic acid	烟酸	59-67-6	C00253	C6H5NO2	123.032	Nicotinic acid derivatives	烟酸及其衍生物	124	78	+	0.73	0.00134368	0.000826345	1.82296	0.0193622	0.293643	1.62605	0.701371
1013	2-Picolinic acid	2-吡啶甲酸	14639-25-9;98-98-6	C10164	C6H5NO2	123.032	Organic acids	有机酸及其衍生物	124	78	+	1.33	0.000946654	0.000445187	1.82011	0.0261265	0.329319	2.12642	1.08843
1017	Dalbergioidin	2',4',5,7-四羟基异黄烷酮	30368-42-4	C10415	C15H12O6	288.063	Flavonoids	黄酮	289.1	153	+	5.99	0.00101603	0.000583146	1.38152	0.0337484	0.364506	1.74232	0.801007
1035	2'-Deoxyinosine-5'-monophosphate	2'-脱氧肌苷-5'-磷酸	3393-18-8	C06196	C10H13N4O7P	332.052	Nucleotide and its derivates	核苷酸及其衍生物	333.1	137	+	1.92	1.58851e-05	3.80627e-05	1.95833	0.0155333	0.268536	0.41734	-1.26071
1048	Benzocaine		94-09-7	C07527	C9H11NO2	165.079	Benzene and substituted derivatives	芳香类化合物	166.1	120	+	3.05	0.00275817	0.00117564	2.38264	0.000616732	0.0487628	2.3461	1.23027
1059	L-Homoglutamic acid	L-高谷氨酸	542-32-5;1118-90-7	C00956	C6H11NO4	161.069	Amino acid and derivatives	氨基酸及其衍生物	162.1	98.1	+	0.73	4.78778e-05	2.6466e-05	1.61349	0.0443245	0.39941	1.80903	0.855215
1065	4-Hydroxyphenylacetaldehyde;4'-Hydroxyacetophenone	对羟基苯乙酮	7339-87-9;99-93-4	C03765;C10700	C8H8O2	136.052	Benzene and substituted derivatives;Phenols	芳香类化合物;酚类	137.1	119	+	10.57	3.69035e-05	2.20909e-05	1.84352	0.0320084	0.35739	1.67053	0.740306
1088	L-Isoleucine;L-Leucine	L-异亮氨酸;L-亮氨酸	73-32-5;61-90-5	C00407;C00123	C6H13NO2	131.095	Amino acid and derivatives	氨基酸及其衍生物	132.1	86.1	+	1.78	0.000182334	3.49114e-05	2.35531	0.00423583	0.164041	5.22277	2.38481
1089	Phloretic acid;Ethylparaben;3-(2-Hydroxyphenyl)propanoic acid	对羟基苯丙酸;尼泊金乙酯	501-97-3;120-47-8;495-78-3	C01744;C01198	C9H10O3	166.063	Phenols;Phenylpropanoic acids	酚类;苯基丙酮酸	167.1	121.067	+	2.84	0.000355783	0.000219328	1.53331	0.0489513	0.411289	1.62215	0.697909
1094	Isorubrofusarin 10-gentiobioside;Rubrofusarin-6-O-beta-D-gentiobioside;Cassiaside C	异红镰霉素龙胆二糖苷;红镰霉素龙胆二糖苷;决明子苷C	200127-93-1;24577-90-0;119170-52-4		C27H32O15	596.174	Phenols	酚类	597.2	255.1	+	12.84	1.27588e-05	2.80023e-05	1.52619	0.0470429	0.40659	0.455632	-1.13406

## Sheet: A.marina
id	compound name	NAME_CH	CAS	KEGG_ID	FORMULA	EXACT_MASS	CLASS_EN	CLASS_CH	Q1	Q3	ionmode	rt	MEAN Am_CS	MEAN Am_CK	VIP	P-VALUE	Q-VALUE	FOLD CHANGE	LOG_FOLDCHANGE
18	4-Aminobutyric acid	4-氨基丁酸	56-12-2	C00334	C4H9NO2	103.063	amino acids	氨基酸	104.1	87.1	+	0.66	2.65485e-05	9.4166e-06	1.62795	0.0476962	0.622218	2.81933	1.49535
27	DL-Dihydrozeatin	二氢玉米素	14894-18-9	C02029	C10H15N5O	221.128	phytohormone	植物激素	222	136	+	3.52	8.03915e-05	5.05461e-05	1.96115	0.016253	0.608431	1.59046	0.669442
39	cis-Zeatin	顺式玉米素	32771-64-5	C15545	C10H13N5O	219.112	phytohormone	植物激素	220	136	+	3.6	9.91425e-06	1.76023e-05	1.97278	0.0316829	0.618556	0.563235	-0.82819
46	Genkwanin	芫花素	437-64-9	C10046	C16H12O5	284.068	flavonoids	类黄酮	284.9	269.9	+	11.1	0.000479581	0.00162111	1.93661	0.0210084	0.613095	0.295835	-1.75713
71	Icariin	淫羊藿苷	489-32-7	C17555	C33H40O15	676.237	flavonoids	类黄酮	677.1	531.1	+	8.12	5.80257e-05	0.000175053	1.80346	0.0454547	0.621859	0.331475	-1.59303
76	L-Valine	L-缬氨酸	72-18-4	C00183	C5H11NO2	117.079	Amino acid and derivatives;amino acids	氨基酸及其衍生物;氨基酸	118.1	72.1	+	0.93	0.00138522	0.00091948	1.90812	0.0272038	0.616776	1.50652	0.59122
78	Proline;L-Proline	脯氨酸;L-脯氨酸	147-85-3	C00148	C5H9NO2	115.063	Amino acid and derivatives;amino acids	氨基酸及其衍生物;氨基酸	116.1	70.1	+	0.73	0.00502762	0.00152536	2.27504	0.0142167	0.605515	3.29603	1.72073
86	L-Glutamic acid	L-谷氨酸	56-86-0	C00025	C5H9NO4	147.053	Amino acid and derivatives;amino acids	氨基酸及其衍生物;氨基酸	148.1	84	+	0.66	0.00164733	0.00392566	2.03828	0.0162669	0.608448	0.41963	-1.25281
90	DL-Alanine;L-Alanine	DL-丙氨酸;L-丙氨酸	302-72-7;56-41-7	C01401;C00041	C3H7NO2	89.0477	Alkaloids;Amino acid and derivatives;amino acids	生物碱;氨基酸及其衍生物;氨基酸	90.1	44	+	0.64	0.000369413	0.000123075	2.07026	0.0265477	0.616466	3.00152	1.58569
91	L-Lysine;L-Glutamine	L-赖氨酸;L-谷氨酰胺	56-87-1;56-85-9	C00047;C00064	C6H14N2O2;C5H10N2O3	146.106	Amino acid and derivatives;amino acids	氨基酸及其衍生物;氨基酸	147.1	84.0667	+	0.64	0.00372533	0.0010276	2.26439	0.010076	0.596146	3.62527	1.85809
125	Cosmosiin;Apigenin 7-O-glucoside (Cosmosiin)	芹甙元-7-葡萄糖苷;芹菜素 7-O-葡萄糖苷	578-74-5	C04608	C21H20O10	432.106	Flavonoids	黄酮	431.1	268	-	6.07	8.07668e-06	3.37975e-05	1.75798	0.0252151	0.615787	0.238973	-2.06508
144	L-Glutamine	L-谷氨酰胺	56-85-9	C00064	C5H10N2O3	146.069	Amino acid and derivatives	氨基酸及其衍生物	145.1	42	-	0.64	0.00029821	8.026e-05	1.75991	0.0215012	0.613464	3.71555	1.89357
145	Clavulanate		58001-44-8	C06662	C8H9NO5	199.048	Carboxylic acids and derivatives	羧酸类及其衍生物	198	108	-	3.07	1.3015e-05	2.29879e-05	1.64905	0.038299	0.620435	0.56617	-0.820692
149	Rhein	大黄酸	478-43-3	C10401	C15H8O6	284.032	Anthraquinones	蒽醌	283	239	-	8.03	4.20106e-05	8.8644e-05	1.96768	0.0386714	0.620522	0.473925	-1.07727
178	L-Tyrosine	L-酪氨酸	60-18-4	C00082	C9H11NO3	181.074	Amino acid and derivatives	氨基酸及其衍生物	180.1	72	-	1.93	5.44972e-05	1.21354e-05	1.85071	0.00530208	0.568933	4.49075	2.16696
205	Orobol (5,7,3',4'-tetrahydroxyisoflavone)	3',4',5,7-四羟基异黄酮	480-23-9	C10510	C15H10O6	286.048	Flavonoids	黄酮	287.1	269	+	7.9	3.45872e-05	7.60454e-05	1.85414	0.0458646	0.621928	0.454824	-1.13662
211	Sakuranetin	樱花亭	2957-21-3	C09833	C16H14O5	286.084	Flavonoids	黄酮	287.1	105	+	9.94	2.15537e-05	3.25841e-05	1.57105	0.0495507	0.622491	0.661479	-0.596232
220	5-Aminovaleric acid	5-氨基戊酸	660-88-8	C00431	C5H11NO2	117.079	Amino acid and derivatives	氨基酸及其衍生物	118.1	55.1	+	1.11	0.00184946	0.000553746	1.88148	0.00727626	0.584205	3.33991	1.73981
222	Aminomalonic acid	氨基丙二酸	1068-84-4	C00872	C3H5NO4	119.022	Organic acids	有机酸及其衍生物	120	74	+	0.65	4.68075e-05	2.47259e-05	1.65222	0.0484947	0.622338	1.89306	0.920716
223	D-Proline		344-25-2	C00763	C5H9NO2	115.063	Carboxylic acids and derivatives	羧酸类及其衍生物	116.1	70.1	+	0.76	0.00502762	0.00152536	2.27504	0.0142167	0.605515	3.29603	1.72073
235	Carbendazim		10605-21-7	C10897	C9H9N3O2	191.069	Benzimidazoles	苯并咪唑类	192.1	160.1	+	4.1	1.3238e-05	2.61834e-05	2.1262	0.0084687	0.590196	0.50559	-0.98396
271	Adenine	腺嘌呤	73-24-5	C00147	C5H5N5	135.054	Nucleotide and its derivates	核苷酸及其衍生物	136.1	119	+	2.6	0.000159543	0.000374215	2.02954	0.0370097	0.620121	0.426339	-1.22993
288	N-Methylcytisine	N-甲基野靛碱	486-86-2	C10760	C12H16N2O	204.126	Alkaloids	生物碱	205.1	134.1	+	1.14	1.97011e-05	1.35427e-05	1.82223	0.044205	0.621643	1.45475	0.540768
290	Coniferylaldehyde	松柏醛	458-36-6	C02666	C10H10O3	178.063	Phenylpropanoids	苯丙素	179.1	91.1	+	6.78	0.00098248	0.00187144	2.17365	0.0148645	0.606526	0.524987	-0.929646
354	Colneleate		52761-34-9	C19827	C18H30O3	294.219	Fatty Acyls	脂肪酰类	295.2	123.1	+	11.97	9.84841e-05	0.000167342	1.80675	0.0496596	0.622507	0.588521	-0.764833
362	Morin	桑色素;桑色素水合物	480-16-0	C10105	C15H10O7	302.043	Flavonoids	黄酮	303	153	+	7.71	9.02673e-05	0.000333479	2.3496	0.00239989	0.509562	0.270684	-1.88532
397	Picrocrocin	苦番红花素	138-55-6	C17055	C16H26O7	330.168	Monoterpenoids	单萜	331.2	151.1	+	9.25	1.5074e-05	4.24685e-05	2.64131	0.000207069	0.168788	0.354945	-1.49433
420	Chrysophanol;Chrysophanic acid; Chrysophanol	大黄酚	481-74-3	C10315	C15H10O4	254.058	Anthraquinones	蒽醌	255.1	152.1	+	7.46	1.47208e-05	3.29632e-05	1.8556	0.016803	0.609101	0.446583	-1.163
435	S-Lactoylglutathione		41656-56-8	C03451	C13H21N3O8S	379.105	Carboxylic acids and derivatives	羧酸类及其衍生物	380.1	262.1	+	4.09	3.63858e-06	7.15775e-06	1.5939	0.0147826	0.606403	0.508342	-0.97613
558	Melatonin	松果体素	8041-44-9;73-31-4	C01598	C13H16N2O2	232.121	Alkaloids	生物碱	233.1	174.1	+	10.42	1.63404e-05	8.96994e-06	2.11645	0.0132012	0.603739	1.82168	0.865273
570	Nandrolone		434-22-0	C07254	C18H26O2	274.193	Steroids and steroid derivatives	甾体及其衍生物	275.2	257.2	+	10.58	0.000947691	0.000343494	2.16121	0.038599	0.620505	2.75898	1.46413
650	Vanillin	香兰素	121-33-5	C00755	C8H8O3	152.047	Phenols	酚类	153.1	65	+	5.9	0.000472196	0.000668398	2.04068	0.0291412	0.617612	0.706459	-0.501321
657	Porson	Porson	56222-03-8		C22H26O6	386.173	Phenols	酚类	387.2	313.1	+	7.45	3.11188e-06	7.41252e-06	1.39786	0.0494143	0.622472	0.419814	-1.25218
671	Safflor Yellow A	红花黄色素 A	85532-77-0		C27H30O15	594.158	Chalcones	查尔酮	595.2	577.2	+	12.34	0.000115029	0.000267974	1.70054	0.048274	0.622306	0.429252	-1.2201
687	Daidzein-4',7-diglucoside	大豆苷元-4',7-二葡萄糖苷	53681-67-7		C27H30O14	578.164	Flavonoids	黄酮	579.2	399.1	+	5.94	0.000191175	0.000535205	2.12106	0.00618961	0.576903	0.3572	-1.4852
705	Theaflavin	茶黄素	4670-05-7		C29H24O12	564.127	Flavonoids	黄酮	565.1	139	+	7.61	3.01566e-06	7.33539e-06	2.12385	0.0364414	0.619976	0.411111	-1.2824
709	Carbofuran		1563-66-2	C14291	C12H15NO3	221.105	Coumarans	香豆素	222.1	123	+	4.03	4.28958e-06	9.95882e-06	1.84507	0.049403	0.62247	0.430732	-1.21514
737	Peonidin-3-glucoside		68795-37-9	C12141	C22H22O11	462.116	Flavonoids	黄酮	463.1	301.1	+	6.93	0.113325	0.167452	1.77606	0.041838	0.6212	0.676759	-0.563286
785	D-Urobilin	D-尿胆素	3947-38-4	C05795	C33H40N4O6	588.295	Tetrapyrroles and derivatives	四吡咯及其衍生物	589.3	553.3	+	11.52	5.72474e-07	1.52162e-05	2.22671	0.0383163	0.620439	0.0376226	-4.73226
795	Dulcoside A	杜克甙A	64432-06-0		C38H60O17	788.383	Diterpenoids	二萜	811.4	649.3	+	7.54	1.96294e-05	3.62041e-05	1.86554	0.0327203	0.6189	0.542188	-0.883136
813	1-Naphthol		90-15-3	C11714	C10H8O	144.058	Naphthalenes	萘类	145.1	127.1	+	8.74	4.8776e-05	0.00010035	1.97367	0.00986441	0.595468	0.486059	-1.0408
828	Sesartemin	蒿脂麻木质体	77394-27-5	C10884	C23H26O8	430.163	Lignans	木脂素	431.2	169.1	+	11.9	1.86941e-05	3.51402e-05	1.92938	0.0350655	0.619604	0.531986	-0.910539
835	Avenanthramide A	Avenanthramide A	108605-70-5	C08472	C16H13NO5	299.079	Cinnamic acids and derivatives	肉桂酸及其衍生物	300.1	119	+	12.07	2.85371e-05	6.66005e-05	1.68696	0.0498829	0.622538	0.428482	-1.22269
859	Mesaconitine	新乌头碱	2752-64-9	C08698	C33H45NO11	631.299	Alkaloids	生物碱	632.3	105	+	12.92	4.69807e-05	1.68575e-05	1.64428	0.043238	0.621468	2.78693	1.47868
861	Talatisamine	塔拉乌头胺	20501-56-8	C08713	C24H39NO5	421.283	Alkaloids	生物碱	422.3	404.3	+	4.66	2.39546e-05	5.17548e-05	1.93037	0.0209645	0.613062	0.462848	-1.11139
878	Anthraquinone	蒽醌	84-65-1	C16207	C14H8O2	208.052	Anthraquinones	蒽醌	209.1	105	+	8.08	0.000549475	0.00139778	1.67992	0.0394206	0.620692	0.393106	-1.34701
882	Primin	樱草素	15121-94-5	C10390	C12H16O3	208.11	Quinones	其他醌类	209.1	43.1	+	5.17	7.25171e-05	0.000133872	1.92365	0.0398667	0.62079	0.541689	-0.884463
899	Kuwanon H	桑皮酮H	76472-87-2	C10100	C45H44O11	760.288	Flavonoids	黄酮	761.3	743.3	+	12.04	4.65298e-05	8.97897e-05	1.78854	0.0157259	0.607746	0.518209	-0.948394
915	Podophyllotoxin	鬼臼毒素	518-28-5	C10874	C22H22O8	414.131	Lignans	木脂素	415.1	397.1	+	9.66	5.34996e-06	1.51901e-05	2.27669	0.0361717	0.619905	0.3522	-1.50553
974	Enterolactone	肠内二酯	78473-71-9	C18165	C18H18O4	298.121	Lignans	木脂素	299.1	107	+	12.07	6.35886e-05	0.000183894	1.56098	0.0262526	0.616322	0.34579	-1.53203
982	Boldione	雄二烯二酮	897-06-3	C20144	C19H24O2	284.178	Steroids and steroid derivatives	甾体及其衍生物	285.2	121.1	+	9.07	2.1482e-05	6.56498e-05	2.13955	0.0175255	0.609919	0.327222	-1.61166
994	6-Aminocaproic acid	6-氨基己酸	60-32-2	C02378	C6H13NO2	131.095	Fatty Acyls	脂肪酰类	132.1	41	+	1.84	0.000767498	0.000285653	1.56302	0.0351769	0.619635	2.68682	1.4259
1038	3-Isopropylmalate		921-28-8	C04411	C7H12O5	176.068	Fatty Acyls	脂肪酰类	177.1	131.1	+	10.79	0.000352175	0.000560066	2.23479	0.0071183	0.583271	0.628811	-0.669302
1042	Streptomycin		57-92-1	C00413	C21H39N7O12	581.266	Organooxygen compounds	有机氧化合物	582.3	263.1	+	12.84	4.77353e-05	2.50092e-05	2.02611	0.0242833	0.61527	1.90871	0.932597
1043	D-Glutamine		5959-95-5	C00819	C5H10N2O3	146.069	Carboxylic acids and derivatives	羧酸类及其衍生物	147.1	84	+	0.66	0.00372533	0.0010276	2.26439	0.010076	0.596146	3.62527	1.85809
1045	Diallyl disulfide	二烯丙基二硫醚	2179-57-9	C08369	C6H10S2	146.022	Miscellaneous	其他类型	147	41	+	0.68	0.000238353	0.000101189	1.74461	0.0409602	0.621022	2.35552	1.23605
1056	L-Homoserine	同型丝氨酸	1927-25-9;672-15-1;6027-21-0	C00263	C4H9NO3	119.058	Amino acid and derivatives	氨基酸及其衍生物	120.1	56	+	0.67	0.000265257	0.000186585	1.80844	0.0489797	0.622409	1.42164	0.507552
1093	Echinocystic acid;Pomolic acid;Sebiferenic acid	刺囊酸;坡模醇酸;Sebiferenic acid	510-30-5;13849-91-7;94390-09-7	C08942	C30H48O4	472.355	Triterpenoids	三萜	473.4	409.3	+	12.27	2.11472e-05	6.50303e-05	1.92435	0.0392762	0.62066	0.32519	-1.62064
