# Supplementary material for: Comparative Transcriptomics and Metabolomics Analyses of Avicennia marina and Kandelia obovata under Chilling Stress during Seedling Stage
Source: Int J Mol Sci. 2023 Nov 30;24(23):16989. doi: 10.3390/ijms242316989 (PMC10707264; doi:10.3390/ijms242316989)
Supplement: Supplementary file 1 [file ijms-24-16989-s001.zip › Table S8.xlsx]

## Sheet: K.obovata
Pathway	Total	Hits	Raw p	-ln(p)	Holm adjust	FDR	Impact	Hits Cpd	Total Cpd
Aminoacyl-tRNA biosynthesis	67	6	0.044697	3.1078	1	1	0	L-Histidine cpd:C00135; L-Aspartic acid cpd:C00049; L-Isoleucine cpd:C00407; L-Leucine cpd:C00123; L-Tyrosine cpd:C00082; L-Proline cpd:C00148	L-Asparagine cpd:C00152; tRNA(Asn) cpd:C01637; L-Histidine cpd:C00135; tRNA(His) cpd:C01643; L-Phenylalanine cpd:C00079; tRNA(Phe) cpd:C01648; L-Arginine cpd:C00062; tRNA(Arg) cpd:C01636; L-Glutamine cpd:C00064; tRNA(Gln) cpd:C01640; L-Cysteine cpd:C00097; tRNA(Cys) cpd:C01639; Glycine cpd:C00037; tRNA(Gly) cpd:C01642; tRNA(Asp) cpd:C01638; L-Aspartic acid cpd:C00049; L-Serine cpd:C00065; tRNA(Se…
Nicotinate and nicotinamide metabolism	12	2	0.078749	2.5415	1	1	0	L-Aspartic acid cpd:C00049; Nicotinic acid cpd:C00253	L-Aspartic acid cpd:C00049; Iminoaspartic acid cpd:C05840; Dihydroxyacetone phosphate cpd:C00111; Quinolinic acid cpd:C03722; Nicotinic acid mononucleotide cpd:C01185; Nicotinic acid adenine dinucleotide cpd:C00857; Nicotinamide ribotide cpd:C00455; NAD cpd:C00003; Nicotinate D-ribonucleoside cpd:C05841; Nicotinic acid cpd:C00253; Nicotinamide riboside cpd:C03150; NADP cpd:C00006
Tyrosine metabolism	18	2	0.15731	1.8496	1	1	0.27273	L-Tyrosine cpd:C00082; 4-Hydroxyphenylacetaldehyde cpd:C03765	3,4-Dihydroxyphenylglycol cpd:C05576; L-Dopa cpd:C00355; Homogentisic acid cpd:C00544; 4-Fumarylacetoacetic acid cpd:C01061; L-Tyrosine cpd:C00082; 4-Hydroxyphenylpyruvic acid cpd:C01179; Succinic acid semialdehyde cpd:C00232; Tyramine cpd:C00483; Dopamine cpd:C03758; N-Methyltyramine cpd:C02442; 3,4-Dihydroxymandelaldehyde cpd:C05577; Gentisate aldehyde cpd:C05585; Fumaric acid cpd:C00122; Aceto…
Arginine and proline metabolism	38	3	0.18767	1.6731	1	1	0.21521	Ornithine cpd:C00077; L-Aspartic acid cpd:C00049; L-Proline cpd:C00148	Ammonia cpd:C00014; Carbamoylphosphate cpd:C00169; Ornithine cpd:C00077; Citrulline cpd:C00327; L-Aspartic acid cpd:C00049; Argininosuccinic acid cpd:C03406; L-Arginine cpd:C00062; L-Glutamic acid cpd:C00025; N-Acetyl-L-alanine cpd:C00624; N-Acetyl-L-glutamyl 5-phosphate cpd:C04133; N-Acetyl-L-glutamate 5-semialdehyde cpd:C01250; N-Acetylornithine cpd:C00437; L-Proline cpd:C00148; Peptide cpd:C00…
Isoquinoline alkaloid biosynthesis	6	1	0.21564	1.5341	1	1	0.5	L-Tyrosine cpd:C00082	L-Tyrosine cpd:C00082; L-Dopa cpd:C00355; Dopamine cpd:C03758; 4-Hydroxyphenylpyruvic acid cpd:C01179; Tyramine cpd:C00483; 3,4-Dihydroxyphenylacetaldehyde cpd:C04043
Valine, leucine and isoleucine biosynthesis	26	2	0.27522	1.2902	1	1	0.01865	L-Leucine cpd:C00123; L-Isoleucine cpd:C00407	(R)-2-Methylmalate cpd:C02612; Citraconic acid cpd:C02226; D-erythro-3-Methylmalate cpd:C06032; L-Threonine cpd:C00188; 3-Methyl-2-oxovaleric acid cpd:C00671; L-Leucine cpd:C00123; (R) 2,3-Dihydroxy-3-methylvalerate cpd:C06007; 2-Isopropylmalic acid cpd:C02504; 3-Isopropylmalate cpd:C04411; Alpha-ketoisovaleric acid cpd:C00141; L-Valine cpd:C00183; (R)-2,3-Dihydroxy-isovalerate cpd:C04272; (S)-2-…
Galactose metabolism	26	2	0.27522	1.2902	1	1	0.06688	Uridine diphosphate glucose cpd:C00029; Uridine diphosphategalactose cpd:C00052	Stachyose cpd:C01613; D-Tagatose 6-phosphate cpd:C01097; D-Gal alpha 1->6D-Gal alpha 1->6D-Glucose cpd:C05404; Raffinose cpd:C00492; Sucrose cpd:C00089; Melibiose cpd:C05402; Galactosylglycerol cpd:C05401; Epimelibiose cpd:C05400; Melibiitol cpd:C05399; Galactinol cpd:C01235; Alpha-D-Glucose cpd:C00267; Alpha-Lactose cpd:C00243; Glucose 1-phosphate cpd:C00103; Uridine diphosphate glucose cpd:C000…
Lysine biosynthesis	10	1	0.33333	1.0986	1	1	0	L-Aspartic acid cpd:C00049	Diaminopimelic acid cpd:C00666; L-Aspartic acid cpd:C00049; L-Aspartyl-4-phosphate cpd:C03082; L-Homoserine cpd:C00263; L-Aspartate-semialdehyde cpd:C00441; Tetrahydrodipicolinate cpd:C03972; meso-2,6-Diaminoheptanedioate cpd:C00680; Saccharopine cpd:C00449; L-2,3-Dihydrodipicolinate cpd:C03340; L-Lysine cpd:C00047
Starch and sucrose metabolism	30	2	0.33497	1.0937	1	1	0.26033	Uridine diphosphate glucose cpd:C00029; D-Maltose cpd:C00208	1,4-beta-D-Glucan cpd:C00760; Cellobiose cpd:C00185; beta-D-Fructose cpd:C02336; Sucrose-6-phosphate cpd:C16688; Sucrose cpd:C00089; D-Glucoside cpd:C01798; 1,3-beta-D-Glucan cpd:C00965; UDP-D-Xylose cpd:C00190; Uridine diphosphate glucose cpd:C00029; Uridine diphosphate glucuronic acid cpd:C00167; Glucose 1-phosphate cpd:C00103; Pectin cpd:C00714; Alpha-D-Glucose cpd:C00267; Glucose 6-phosphate …
Cyanoamino acid metabolism	11	1	0.35994	1.0218	1	1	0	L-Aspartic acid cpd:C00049	alpha-Aminopropiononitrile cpd:C05714; gamma-Amino-gamma-cyanobutanoate cpd:C05715; 3-Cyano-L-alanine cpd:C02512; Beta-Aminopropionitrile cpd:C05670; Glycine cpd:C00037; Alanine cpd:C01401; DL-Glutamate cpd:C00302; gamma-Glutamyl-beta-cyanoalanine cpd:C05711; L-Aspartic acid cpd:C00049; gamma-Glutamyl-beta-aminopropiononitrile cpd:C06114; L-Serine cpd:C00065
beta-Alanine metabolism	12	1	0.3855	0.95322	1	1	0	L-Aspartic acid cpd:C00049	Acrylyl-CoA cpd:C00894; 3-Hydroxypropionyl-CoA cpd:C05668; Beta-Alanine cpd:C00099; L-Aspartic acid cpd:C00049; Spermine cpd:C00750; 1,3-Diaminopropane cpd:C00986; 3-Aminopropionaldehyde cpd:C05665; Ureidopropionic acid cpd:C02642; Dihydrouracil cpd:C00429; Propionyl-CoA cpd:C00100; Pantothenic acid cpd:C00864; Spermidine cpd:C00315
Pentose and glucuronate interconversions	12	1	0.3855	0.95322	1	1	0.1	Uridine diphosphate glucose cpd:C00029	Pectic acid cpd:C00470; D-Ribulose 5-phosphate cpd:C00199; D-Xylulose cpd:C00310; D-Xylose cpd:C00181; Glucose 1-phosphate cpd:C00103; Uridine diphosphate glucose cpd:C00029; Digalacturonate cpd:C02273; Pectin cpd:C00714; D-Galacturonate cpd:C00333; Xylulose 5-phosphate cpd:C00231; Uridine diphosphate glucuronic acid cpd:C00167; 4-(4-Deoxy-alpha-D-gluc-4-enuronosyl)-D-galacturonate cpd:C06118
Valine, leucine and isoleucine degradation	34	2	0.39338	0.93298	1	1	0	L-Isoleucine cpd:C00407; L-Leucine cpd:C00123	Enzyme N6-(lipoyl)lysine cpd:C15972; 2-Methyl-1-hydroxybutyl-ThPP cpd:C15978; Enzyme N6-(dihydrolipoyl)lysine cpd:C15973; 2-Methyl-1-hydroxypropyl-ThPP cpd:C15976; 3-Methyl-1-hydroxybutyl-ThPP cpd:C15974; Acetyl-CoA cpd:C00024; Acetoacetyl-CoA cpd:C00332; 3-Hydroxy-3-methylglutaryl-CoA cpd:C00356; 3-Methylcrotonyl-CoA cpd:C03069; 3-Hydroxyisovaleryl-CoA cpd:C05998; Isovaleryl-CoA cpd:C02939; 3-Me…
Glycerolipid metabolism	13	1	0.41006	0.89145	1	1	0	Uridine diphosphate glucose cpd:C00029	Uridine diphosphate glucose cpd:C00029; UDP-6-sulfoquinovose cpd:C11521; 1,2-Diacyl-sn-glycerol cpd:C00641; 1,2-Diacyl-3-beta-D-galactosyl-sn-glycerol cpd:C03692; Acyl-CoA cpd:C00040; 1-Acyl-sn-glycerol 3-phosphate cpd:C00681; Glycerol 3-phosphate cpd:C00093; Glycerol cpd:C00116; D-Glyceraldehyde cpd:C00577; Digalactosyl-diacylglycerol cpd:C06037; Sulfoquinovosyldiacylglycerol cpd:C13508; PA(16:0…
Sphingolipid metabolism	13	1	0.41006	0.89145	1	1	0.33333	O-Phosphoethanolamine cpd:C00346	Sphinganine cpd:C00836; Dihydroceramide cpd:C12126; Palmityl-CoA cpd:C00154; L-Serine cpd:C00065; Galabiosylceramide cpd:C06126; Lactosylceramide cpd:C01290; Sphingosine 1-phosphate cpd:C06124; Sphinganine 1-phosphate cpd:C01120; Ceramide cpd:C00195; 3-Dehydrosphinganine cpd:C02934; Galactosylceramide cpd:C02686; Glucosylceramide cpd:C01190; O-Phosphoethanolamine cpd:C00346
Ascorbate and aldarate metabolism	15	1	0.45633	0.78454	1	1	0	Uridine diphosphate glucose cpd:C00029	L-Galactose cpd:C01825; L-Galactose 1-phosphate cpd:C15926; GDP-L-galactose cpd:C02280; GDP-L-gulose cpd:C15925; Guanosine diphosphate mannose cpd:C00096; Myoinositol cpd:C00137; Uridine diphosphate glucose cpd:C00029; Ascorbic acid cpd:C00072; D-Glucurono-6,3-lactone cpd:C02670; L-Galactono-1,4-lactone cpd:C01115; D-Glucuronic acid cpd:C00191; Uridine diphosphate glucuronic acid cpd:C00167; Dehy…
Histidine metabolism	16	1	0.47811	0.73792	1	1	0.0625	L-Histidine cpd:C00135	L-Histidine cpd:C00135; Imidazole-4-acetaldehyde cpd:C05130; Phosphoribosyl-ATP cpd:C02739; L-Histidinal cpd:C01929; L-Histidinol cpd:C00860; L-Histidinol phosphate cpd:C01100; D-Erythro-imidazole-glycerol-phosphate cpd:C04666; PhosphoribosylformiminoAICAR-phosphate cpd:C04896; Phosphoribosyl-AMP cpd:C02741; Phosphoribulosylformimino-AICAR-P cpd:C04916; Histamine cpd:C00388; Imidazoleacetic acid …
Amino sugar and nucleotide sugar metabolism	41	2	0.48974	0.71389	1	1	0.18255	Uridine diphosphate glucose cpd:C00029; Uridine diphosphategalactose cpd:C00052	UDP-4-dehydro-6-deoxy-D-glucose cpd:C04089; UDP-4-keto-rhamnose cpd:C17328; Uridine diphosphate glucose cpd:C00029; Uridine diphosphate glucuronic acid cpd:C00167; N-Acetyl-D-Glucosamine 6-Phosphate cpd:C00357; N-Acetyl-alpha-D-glucosamine 1-phosphate cpd:C04501; Glucose 1-phosphate cpd:C00103; Galactose 1-phosphate cpd:C00446; UDP-L-arabinose cpd:C00935; Mannose 6-phosphate cpd:C00275; Guanosine…
Zeatin biosynthesis	19	1	0.53845	0.61907	1	1	0.00435	Uridine diphosphate glucose cpd:C00029	Adenosine monophosphate cpd:C00020; Dimethylallylpyrophosphate cpd:C00235; ADP cpd:C00008; Uridine diphosphate glucose cpd:C00029; Dihydrozeatin cpd:C02029; N6-(delta2-Isopentenyl)-adenine cpd:C04083; tRNA cpd:C00066; N6-(delta2-Isopentenyl)-adenosine 5'-monophosphate cpd:C04713; Isopentenyladenosine-5'-diphosphate cpd:C16426; Isopentenyladenosine-5'-triphosphate cpd:C16424; Adenosine triphosphat…
Phenylpropanoid biosynthesis	45	2	0.54052	0.61522	1	1	0.0366	Sinapoyl aldehyde cpd:C05610; Cinnamaldehyde cpd:C00903	4-Hydroxycinnamyl aldehyde cpd:C05608; p-Coumaroyl-CoA cpd:C00223; 4-Hydroxycinnamic acid cpd:C00811; Sinapoyl aldehyde cpd:C05610; Coniferyl aldehyde cpd:C02666; Coniferyl alcohol cpd:C00590; Ferulate cpd:C01494; p-Coumaroyl quinic acid cpd:C12208; 4-Coumaroylshikimate cpd:C02947; cis-beta-D-Glucosyl-2-hydroxycinnamate cpd:C05839; L-Phenylalanine cpd:C00079; 5-Hydroxyferuloyl-CoA cpd:C12203; Sin…
Phenylalanine, tyrosine and tryptophan biosynthesis	21	1	0.57481	0.55371	1	1	0	L-Tyrosine cpd:C00082	5-O-(1-Carboxyvinyl)-3-phosphoshikimate cpd:C01269; Indoleglycerol phosphate cpd:C03506; Indole cpd:C00463; 1-(2-Carboxyphenylamino)-1-deoxy-D-ribulose 5-phosphate cpd:C01302; N-(5-Phospho-D-ribosyl)anthranilate cpd:C04302; Chorismate cpd:C00251; Phenylpyruvic acid cpd:C00166; L-Tyrosine cpd:C00082; Shikimate 3-phosphate cpd:C03175; Shikimic acid cpd:C00493; 3-Dehydroquinate cpd:C00944; 2-Dehydro…
Pyruvate metabolism	21	1	0.57481	0.55371	1	1	0	S-Lactoylglutathione cpd:C03451	Enzyme N6-(lipoyl)lysine cpd:C15972; 2-(a-Hydroxyethyl)thiamine diphosphate cpd:C05125; Phosphoenolpyruvic acid cpd:C00074; Oxalacetic acid cpd:C00036; Pyruvic acid cpd:C00022; S-Lactoylglutathione cpd:C03451; L-Malic acid cpd:C00149; Acetyl-CoA cpd:C00024; L-Lactic acid cpd:C00186; Acetyl adenylate cpd:C05993; Acetic acid cpd:C00033; Acetaldehyde cpd:C00084; 2-Hydroxyethylenedicarboxylate cpd:C0…
Carbon fixation in photosynthetic organisms	21	1	0.57481	0.55371	1	1	0	L-Aspartic acid cpd:C00049	Phosphoenolpyruvic acid cpd:C00074; Carbon dioxide cpd:C00011; L-Malic acid cpd:C00149; Pyruvic acid cpd:C00022; L-Aspartic acid cpd:C00049; Oxalacetic acid cpd:C00036; Dihydroxyacetone phosphate cpd:C00111; D-Erythrose 4-phosphate cpd:C00279; Sedoheptulose 1,7-bisphosphate cpd:C00447; D-Glyceraldehyde 3-phosphate cpd:C00118; Sedoheptulose 7-phosphate cpd:C05382; D-Ribulose 5-phosphate cpd:C00117…
Alanine, aspartate and glutamate metabolism	22	1	0.59193	0.52437	1	1	0.20115	L-Aspartic acid cpd:C00049	2-Oxosuccinamate cpd:C02362; L-Aspartic acid cpd:C00049; Argininosuccinic acid cpd:C03406; Adenylsuccinic acid cpd:C03794; L-Alanine cpd:C00041; Succinic acid semialdehyde cpd:C00232; Oxoglutaric acid cpd:C00026; L-Glutamine cpd:C00064; L-Glutamic acid cpd:C00025; 2-Keto-glutaramic acid cpd:C00940; (S)-1-Pyrroline-5-carboxylate cpd:C03912; Oxalacetic acid cpd:C00036; L-Asparagine cpd:C00152; Fuma…
Ubiquinone and other terpenoid-quinone biosynthesis	23	1	0.60837	0.49698	1	1	0	L-Tyrosine cpd:C00082	2-Succinylbenzoyl-CoA cpd:C03160; Chorismate cpd:C00251; 4-Hydroxyphenylpyruvic acid cpd:C01179; 2-Methyl-6-phytylquinol cpd:C15882; 2-Methyl-6-solanyl-1,4-benzoquinol cpd:C17570; L-Tyrosine cpd:C00082; 4-Hydroxycinnamic acid cpd:C00811; Octaprenyl diphosphate cpd:C04146; 1,4-Dihydroxy-2-naphthoate cpd:C03657; Phytyl diphosphate cpd:C05427; Delta-Tocopherol cpd:C14151; 2,3-Dimethyl-5-phytylquinol…
Glycerophospholipid metabolism	25	1	0.63932	0.44735	1	1	0.08147	O-Phosphoethanolamine cpd:C00346	Phosphatidylethanolamine cpd:C00350; LysoPC(18:1(9Z)) cpd:C04230; Phosphorylcholine cpd:C00588; O-Phosphoethanolamine cpd:C00346; Phosphatidylcholine cpd:C00157; Phosphatidylglycerol cpd:C00344; 1,2-Diacyl-sn-glycerol cpd:C00641; Glycerylphosphorylethanolamine cpd:C01233; Acyl-CoA cpd:C00040; 1-Acyl-sn-glycerol 3-phosphate cpd:C00681; CDP-diacylglycerol cpd:C00269; Glycerol 3-phosphate cpd:C00093…
Glucosinolate biosynthesis	54	2	0.64194	0.44326	1	1	0	L-Leucine cpd:C00123; L-Isoleucine cpd:C00407	L-Methionine cpd:C00073; Homomethionine cpd:C17213; S-(4-Methylthiobutylthiohydroximoyl)-L-cysteine cpd:C17242; 3-Methylthiopropyl-desulfoglucosinolate cpd:C17244; 2-Oxo-5-methylthiopentanoic acid cpd:C17211; 4-Methylthiobutanaldoxime cpd:C17241; 4-Methylthiobutylthiohydroximate cpd:C17243; 2-Oxo-4-methylthiobutanoic acid cpd:C01180; 2-Oxo-6-methylthiohexanoic acid cpd:C17216; 2-Oxo-7-methylthioh…
Glycine, serine and threonine metabolism	30	1	0.70659	0.3473	1	1	0	L-Aspartic acid cpd:C00049	L-Serine cpd:C00065; Choline cpd:C00114; Betaine aldehyde cpd:C00576; 3-Phospho-D-glycerate cpd:C00197; Glycine cpd:C00037; L-Aspartic acid cpd:C00049; Phosphoserine cpd:C01005; 5,10-Methylene-THF cpd:C00143; L-Threonine cpd:C00188; O-Phosphohomoserine cpd:C01102; L-Aspartyl-4-phosphate cpd:C03082; L-Homoserine cpd:C00263; Lipoylprotein cpd:C02051; Aminoacetone cpd:C01888; Tetrahydrofolic acid cp…
Purine metabolism	61	2	0.70834	0.34483	1	1	0.00179	Inosine cpd:C00294; dIMP cpd:C06196	Guanosine diphosphate cpd:C00035; Xanthine cpd:C00385; D-Ribulose 5-phosphate cpd:C00117; Phosphoribosyl pyrophosphate cpd:C00119; L-Glutamine cpd:C00064; 5-Phosphoribosylamine cpd:C03090; Glycineamideribotide cpd:C03838; AICAR cpd:C04677; SAICAR cpd:C04823; 5-amino-1-(5-phospho-D-ribosyl)imidazole-4-carboxylate cpd:C04751; RNA cpd:C00046; Adenosine triphosphate cpd:C00002; dATP cpd:C00131; ADP c…
Cysteine and methionine metabolism	34	1	0.75141	0.28581	1	1	0	L-Aspartic acid cpd:C00049	1-Aminocyclopropane-1-carboxylate cpd:C01234; S-Adenosylmethionine cpd:C00019; 2-Oxo-4-methylthiobutanoic acid cpd:C01180; 1,2-Dihydroxy-3-keto-5-methylthiopentene cpd:C15606; 5'-Methylthioadenosine cpd:C00170; S-Adenosylmethioninamine cpd:C01137; L-Cystathionine cpd:C02291; L-Homocysteine cpd:C00155; L-Methionine cpd:C00073; S-Adenosylhomocysteine cpd:C00021; O-Succinyl-L-homoserine cpd:C01118; …
Flavonoid biosynthesis	43	1	0.82913	0.18738	1	1	0.05301	Taxifolin cpd:C01617	Pinobanksin cpd:C09826; p-Coumaroyl quinic acid cpd:C12208; 4-Coumaroylshikimate cpd:C02947; Kaempferol cpd:C05903; Delphinidin cpd:C05908; Cyanidin cpd:C05905; Pelargonidin cpd:C05904; Leucodelphinidin cpd:C05909; Leucocyanidin cpd:C05906; cis-3,4-Leucopelargonidin cpd:C03648; Garbanzol cpd:C09751; Dihydrokaempferol cpd:C00974; Naringenin cpd:C00509; Liquiritigenin cpd:C09762; Pentahydroxyflavan…

## Sheet: A.marina
Pathway	Total	Hits	Raw p	-ln(p)	Holm adjust	FDR	Impact	Hits Cpd	Total Cpd
Aminoacyl-tRNA biosynthesis	67	6	0.0077656	4.858	0.67561	0.67561	0	L-Glutamine cpd:C00064; L-Valine cpd:C00183; L-Lysine cpd:C00047; L-Tyrosine cpd:C00082; L-Proline cpd:C00148; L-Glutamic acid cpd:C00025	L-Asparagine cpd:C00152; tRNA(Asn) cpd:C01637; L-Histidine cpd:C00135; tRNA(His) cpd:C01643; L-Phenylalanine cpd:C00079; tRNA(Phe) cpd:C01648; L-Arginine cpd:C00062; tRNA(Arg) cpd:C01636; L-Glutamine cpd:C00064; tRNA(Gln) cpd:C01640; L-Cysteine cpd:C00097; tRNA(Cys) cpd:C01639; Glycine cpd:C00037; tRNA(Gly) cpd:C01642; tRNA(Asp) cpd:C01638; L-Aspartic acid cpd:C00049; L-Serine cpd:C00065; tRNA(Se…
Lysine biosynthesis	10	2	0.028162	3.5698	1	1	0.07407	L-Homoserine cpd:C00263; L-Lysine cpd:C00047	Diaminopimelic acid cpd:C00666; L-Aspartic acid cpd:C00049; L-Aspartyl-4-phosphate cpd:C03082; L-Homoserine cpd:C00263; L-Aspartate-semialdehyde cpd:C00441; Tetrahydrodipicolinate cpd:C03972; meso-2,6-Diaminoheptanedioate cpd:C00680; Saccharopine cpd:C00449; L-2,3-Dihydrodipicolinate cpd:C03340; L-Lysine cpd:C00047
Nitrogen metabolism	15	2	0.060366	2.8073	1	1	0	L-Glutamic acid cpd:C00025; L-Glutamine cpd:C00064	L-Phenylalanine cpd:C00079; Formamide cpd:C00488; Cyanate cpd:C01417; Carbon dioxide cpd:C00011; Ammonia cpd:C00014; Nitrate cpd:C00244; Nitrite cpd:C00088; L-Glutamic acid cpd:C00025; L-Glutamine cpd:C00064; Allocystathionine cpd:C00542; Nitrile cpd:C00726; Formic acid cpd:C00058; Carbamic acid cpd:C01563; Carbonic acid cpd:C01353; Glycine cpd:C00037
Arginine and proline metabolism	38	3	0.081012	2.5132	1	1	0.22673	L-Glutamic acid cpd:C00025; L-Proline cpd:C00148; L-Glutamine cpd:C00064	Ammonia cpd:C00014; Carbamoylphosphate cpd:C00169; Ornithine cpd:C00077; Citrulline cpd:C00327; L-Aspartic acid cpd:C00049; Argininosuccinic acid cpd:C03406; L-Arginine cpd:C00062; L-Glutamic acid cpd:C00025; N-Acetyl-L-alanine cpd:C00624; N-Acetyl-L-glutamyl 5-phosphate cpd:C04133; N-Acetyl-L-glutamate 5-semialdehyde cpd:C01250; N-Acetylornithine cpd:C00437; L-Proline cpd:C00148; Peptide cpd:C00…
Zeatin biosynthesis	19	2	0.091909	2.387	1	1	0.00435	Dihydrozeatin cpd:C02029; Adenine cpd:C00147	Adenosine monophosphate cpd:C00020; Dimethylallylpyrophosphate cpd:C00235; ADP cpd:C00008; Uridine diphosphate glucose cpd:C00029; Dihydrozeatin cpd:C02029; N6-(delta2-Isopentenyl)-adenine cpd:C04083; tRNA cpd:C00066; N6-(delta2-Isopentenyl)-adenosine 5'-monophosphate cpd:C04713; Isopentenyladenosine-5'-diphosphate cpd:C16426; Isopentenyladenosine-5'-triphosphate cpd:C16424; Adenosine triphosphat…
Alanine, aspartate and glutamate metabolism	22	2	0.11808	2.1364	1	1	0.57471	L-Glutamine cpd:C00064; L-Glutamic acid cpd:C00025	2-Oxosuccinamate cpd:C02362; L-Aspartic acid cpd:C00049; Argininosuccinic acid cpd:C03406; Adenylsuccinic acid cpd:C03794; L-Alanine cpd:C00041; Succinic acid semialdehyde cpd:C00232; Oxoglutaric acid cpd:C00026; L-Glutamine cpd:C00064; L-Glutamic acid cpd:C00025; 2-Keto-glutaramic acid cpd:C00940; (S)-1-Pyrroline-5-carboxylate cpd:C03912; Oxalacetic acid cpd:C00036; L-Asparagine cpd:C00152; Fuma…
Isoquinoline alkaloid biosynthesis	6	1	0.15264	1.8797	1	1	0.5	L-Tyrosine cpd:C00082	L-Tyrosine cpd:C00082; L-Dopa cpd:C00355; Dopamine cpd:C03758; 4-Hydroxyphenylpyruvic acid cpd:C01179; Tyramine cpd:C00483; 3,4-Dihydroxyphenylacetaldehyde cpd:C04043
Valine, leucine and isoleucine biosynthesis	26	2	0.15546	1.8614	1	1	0.0356	3-Isopropylmalate cpd:C04411; L-Valine cpd:C00183	(R)-2-Methylmalate cpd:C02612; Citraconic acid cpd:C02226; D-erythro-3-Methylmalate cpd:C06032; L-Threonine cpd:C00188; 3-Methyl-2-oxovaleric acid cpd:C00671; L-Leucine cpd:C00123; (R) 2,3-Dihydroxy-3-methylvalerate cpd:C06007; 2-Isopropylmalic acid cpd:C02504; 3-Isopropylmalate cpd:C04411; Alpha-ketoisovaleric acid cpd:C00141; L-Valine cpd:C00183; (R)-2,3-Dihydroxy-isovalerate cpd:C04272; (S)-2-…
Pantothenate and CoA biosynthesis	14	1	0.32138	1.1351	1	1	0	L-Valine cpd:C00183	Dephospho-CoA cpd:C00882; 4-Phosphopantothenoylcysteine cpd:C04352; Ureidopropionic acid cpd:C02642; Dihydrouracil cpd:C00429; (R)-Pantoate cpd:C00522; Beta-Alanine cpd:C00099; 2,3-Dihydroxy-3-methylbutanoate cpd:C04039; 2-Acetolactate cpd:C00900; Pyruvic acid cpd:C00022; L-Valine cpd:C00183; Coenzyme A cpd:C00010; Pantetheine 4'-phosphate cpd:C01134; Pantothenic acid cpd:C00864; Alpha-ketoisoval…
Lysine degradation	17	1	0.37582	0.97863	1	1	0	L-Lysine cpd:C00047	L-Lysine cpd:C00047; Protein N6,N6,N6-trimethyl-L-lysine cpd:C05546; Protein lysine cpd:C02188; Protein N6-methyl-L-lysine cpd:C05544; Protein N6,N6-dimethyl-L-lysine cpd:C05545; Crotonoyl-CoA cpd:C00877; Saccharopine cpd:C00449; Oxoadipic acid cpd:C00322; Acetoacetyl-CoA cpd:C00332; 4-Trimethylammoniobutanal cpd:C01149; S-Glutaryldihydrolipoamide cpd:C06157; N6,N6,N6-Trimethyl-L-lysine cpd:C0379…
Butanoate metabolism	18	1	0.39301	0.93391	1	1	0	L-Glutamic acid cpd:C00025	3-Butyn-1-al cpd:C06145; 3-Hydroxy-3-methylglutaryl-CoA cpd:C00356; Acetyl-CoA cpd:C00024; Acetoacetyl-CoA cpd:C00332; (S)-3-Hydroxybutanoyl-CoA cpd:C01144; Crotonoyl-CoA cpd:C00877; L-Glutamic acid cpd:C00025; Succinic acid semialdehyde cpd:C00232; Thiamine pyrophosphate cpd:C00068; Pyruvic acid cpd:C00022; 2-(a-Hydroxyethyl)thiamine diphosphate cpd:C05125; (R)-Acetoin cpd:C00810; 3-Butynoate cp…
Tyrosine metabolism	18	1	0.39301	0.93391	1	1	0.27273	L-Tyrosine cpd:C00082	3,4-Dihydroxyphenylglycol cpd:C05576; L-Dopa cpd:C00355; Homogentisic acid cpd:C00544; 4-Fumarylacetoacetic acid cpd:C01061; L-Tyrosine cpd:C00082; 4-Hydroxyphenylpyruvic acid cpd:C01179; Succinic acid semialdehyde cpd:C00232; Tyramine cpd:C00483; Dopamine cpd:C03758; N-Methyltyramine cpd:C02442; 3,4-Dihydroxymandelaldehyde cpd:C05577; Gentisate aldehyde cpd:C05585; Fumaric acid cpd:C00122; Aceto…
Phenylalanine, tyrosine and tryptophan biosynthesis	21	1	0.44186	0.81675	1	1	0	L-Tyrosine cpd:C00082	5-O-(1-Carboxyvinyl)-3-phosphoshikimate cpd:C01269; Indoleglycerol phosphate cpd:C03506; Indole cpd:C00463; 1-(2-Carboxyphenylamino)-1-deoxy-D-ribulose 5-phosphate cpd:C01302; N-(5-Phospho-D-ribosyl)anthranilate cpd:C04302; Chorismate cpd:C00251; Phenylpyruvic acid cpd:C00166; L-Tyrosine cpd:C00082; Shikimate 3-phosphate cpd:C03175; Shikimic acid cpd:C00493; 3-Dehydroquinate cpd:C00944; 2-Dehydro…
Pyruvate metabolism	21	1	0.44186	0.81675	1	1	0	S-Lactoylglutathione cpd:C03451	Enzyme N6-(lipoyl)lysine cpd:C15972; 2-(a-Hydroxyethyl)thiamine diphosphate cpd:C05125; Phosphoenolpyruvic acid cpd:C00074; Oxalacetic acid cpd:C00036; Pyruvic acid cpd:C00022; S-Lactoylglutathione cpd:C03451; L-Malic acid cpd:C00149; Acetyl-CoA cpd:C00024; L-Lactic acid cpd:C00186; Acetyl adenylate cpd:C05993; Acetic acid cpd:C00033; Acetaldehyde cpd:C00084; 2-Hydroxyethylenedicarboxylate cpd:C0…
Ubiquinone and other terpenoid-quinone biosynthesis	23	1	0.47229	0.75017	1	1	0	L-Tyrosine cpd:C00082	2-Succinylbenzoyl-CoA cpd:C03160; Chorismate cpd:C00251; 4-Hydroxyphenylpyruvic acid cpd:C01179; 2-Methyl-6-phytylquinol cpd:C15882; 2-Methyl-6-solanyl-1,4-benzoquinol cpd:C17570; L-Tyrosine cpd:C00082; 4-Hydroxycinnamic acid cpd:C00811; Octaprenyl diphosphate cpd:C04146; 1,4-Dihydroxy-2-naphthoate cpd:C03657; Phytyl diphosphate cpd:C05427; Delta-Tocopherol cpd:C14151; 2,3-Dimethyl-5-phytylquinol…
Purine metabolism	61	2	0.50125	0.69066	1	1	0	L-Glutamine cpd:C00064; Adenine cpd:C00147	Guanosine diphosphate cpd:C00035; Xanthine cpd:C00385; D-Ribulose 5-phosphate cpd:C00117; Phosphoribosyl pyrophosphate cpd:C00119; L-Glutamine cpd:C00064; 5-Phosphoribosylamine cpd:C03090; Glycineamideribotide cpd:C03838; AICAR cpd:C04677; SAICAR cpd:C04823; 5-amino-1-(5-phospho-D-ribosyl)imidazole-4-carboxylate cpd:C04751; RNA cpd:C00046; Adenosine triphosphate cpd:C00002; dATP cpd:C00131; ADP c…
Glutathione metabolism	26	1	0.51492	0.66374	1	1	0.07756	L-Glutamic acid cpd:C00025	R-S-Glutathione cpd:C02320; Glutathione cpd:C00051; NADP cpd:C00006; NADPH cpd:C00005; Oxidized glutathione cpd:C00127; Gamma-Glutamylcysteine cpd:C00669; Glycine cpd:C00037; Pyroglutamic acid cpd:C01879; L-Amino acid cpd:C00151; RX cpd:C01322; Putrescine cpd:C00134; Cadaverine cpd:C01672; Ascorbic acid cpd:C00072; Tryparedoxin cpd:C16663; Trypanothione cpd:C02090; Cysteinylglycine cpd:C01419; R-…
Porphyrin and chlorophyll metabolism	29	1	0.5542	0.59023	1	1	0	L-Glutamic acid cpd:C00025	Heme O cpd:C15672; Heme cpd:C00032; Coproporphyrin III cpd:C03263; Phytyl diphosphate cpd:C05427; Chlorophyllide cpd:C02139; Divinylprotochlorophyllide cpd:C11831; 13(1)-Oxo-magnesium-protoporphyrin IX 13-monomethyl ester cpd:C11830; 13(1)-Hydroxy-magnesium-protoporphyrin IX 13-monomethyl ester cpd:C11829; Magnesium protoporphyrin monomethyl ester cpd:C04536; Protoporphyrin IX cpd:C02191; Magnesi…
Glycine, serine and threonine metabolism	30	1	0.56659	0.56811	1	1	0.07636	L-Homoserine cpd:C00263	L-Serine cpd:C00065; Choline cpd:C00114; Betaine aldehyde cpd:C00576; 3-Phospho-D-glycerate cpd:C00197; Glycine cpd:C00037; L-Aspartic acid cpd:C00049; Phosphoserine cpd:C01005; 5,10-Methylene-THF cpd:C00143; L-Threonine cpd:C00188; O-Phosphohomoserine cpd:C01102; L-Aspartyl-4-phosphate cpd:C03082; L-Homoserine cpd:C00263; Lipoylprotein cpd:C02051; Aminoacetone cpd:C01888; Tetrahydrofolic acid cp…
Cysteine and methionine metabolism	34	1	0.6129	0.48955	1	1	0	L-Homoserine cpd:C00263	1-Aminocyclopropane-1-carboxylate cpd:C01234; S-Adenosylmethionine cpd:C00019; 2-Oxo-4-methylthiobutanoic acid cpd:C01180; 1,2-Dihydroxy-3-keto-5-methylthiopentene cpd:C15606; 5'-Methylthioadenosine cpd:C00170; S-Adenosylmethioninamine cpd:C01137; L-Cystathionine cpd:C02291; L-Homocysteine cpd:C00155; L-Methionine cpd:C00073; S-Adenosylhomocysteine cpd:C00021; O-Succinyl-L-homoserine cpd:C01118; …
Valine, leucine and isoleucine degradation	34	1	0.6129	0.48955	1	1	0	L-Valine cpd:C00183	Enzyme N6-(lipoyl)lysine cpd:C15972; 2-Methyl-1-hydroxybutyl-ThPP cpd:C15978; Enzyme N6-(dihydrolipoyl)lysine cpd:C15973; 2-Methyl-1-hydroxypropyl-ThPP cpd:C15976; 3-Methyl-1-hydroxybutyl-ThPP cpd:C15974; Acetyl-CoA cpd:C00024; Acetoacetyl-CoA cpd:C00332; 3-Hydroxy-3-methylglutaryl-CoA cpd:C00356; 3-Methylcrotonyl-CoA cpd:C03069; 3-Hydroxyisovaleryl-CoA cpd:C05998; Isovaleryl-CoA cpd:C02939; 3-Me…
Pyrimidine metabolism	38	1	0.65439	0.42405	1	1	0	L-Glutamine cpd:C00064	Thioredoxin cpd:C00342; Uridine 5'-diphosphate cpd:C00015; Uridine 5'-monophosphate cpd:C00105; L-Glutamine cpd:C00064; Carbamoylphosphate cpd:C00169; 4,5-Dihydroorotic acid cpd:C00337; Orotidylic acid cpd:C01103; RNA cpd:C00046; Uridine triphosphate cpd:C00075; Dihydrouracil cpd:C00429; Ureidopropionic acid cpd:C02642; Cytidine triphosphate cpd:C00063; CDP cpd:C00112; Cytidine monophosphate cpd:…
Phenylpropanoid biosynthesis	45	1	0.71684	0.33291	1	1	0.07747	Coniferyl aldehyde cpd:C02666	4-Hydroxycinnamyl aldehyde cpd:C05608; p-Coumaroyl-CoA cpd:C00223; 4-Hydroxycinnamic acid cpd:C00811; Sinapoyl aldehyde cpd:C05610; Coniferyl aldehyde cpd:C02666; Coniferyl alcohol cpd:C00590; Ferulate cpd:C01494; p-Coumaroyl quinic acid cpd:C12208; 4-Coumaroylshikimate cpd:C02947; cis-beta-D-Glucosyl-2-hydroxycinnamate cpd:C05839; L-Phenylalanine cpd:C00079; 5-Hydroxyferuloyl-CoA cpd:C12203; Sin…
Glucosinolate biosynthesis	54	1	0.78121	0.24691	1	1	0	L-Valine cpd:C00183	L-Methionine cpd:C00073; Homomethionine cpd:C17213; S-(4-Methylthiobutylthiohydroximoyl)-L-cysteine cpd:C17242; 3-Methylthiopropyl-desulfoglucosinolate cpd:C17244; 2-Oxo-5-methylthiopentanoic acid cpd:C17211; 4-Methylthiobutanaldoxime cpd:C17241; 4-Methylthiobutylthiohydroximate cpd:C17243; 2-Oxo-4-methylthiobutanoic acid cpd:C01180; 2-Oxo-6-methylthiohexanoic acid cpd:C17216; 2-Oxo-7-methylthioh…
