# Supplementary material for: Comparative Transcriptomics and Metabolomics Analyses of Avicennia marina and Kandelia obovata under Chilling Stress during Seedling Stage
Source: Int J Mol Sci. 2023 Nov 30;24(23):16989. doi: 10.3390/ijms242316989 (PMC10707264; doi:10.3390/ijms242316989)
Supplement: Supplementary file 1 [file ijms-24-16989-s001.zip › Table S9.xlsx]

## Sheet: K.obovata
KEGG.id	Entry.type	KEGG.name	p.score
egr00053	pathway	Ascorbate and aldarate metabolism - Eucalyptu...	0.000480774
egr00250	pathway	Alanine, aspartate and glutamate metabolism -...	1e-06
egr00260	pathway	Glycine, serine and threonine metabolism - Eu...	0.000567275
egr00310	pathway	Lysine degradation - Eucalyptus grandis (rose...	0.000171376
egr00330	pathway	Arginine and proline metabolism - Eucalyptus ...	1.44733e-05
egr00380	pathway	Tryptophan metabolism - Eucalyptus grandis (r...	0.00271242
egr00620	pathway	Pyruvate metabolism - Eucalyptus grandis (ros...	0.00516694
egr00710	pathway	Carbon fixation in photosynthetic organisms -...	1e-06
egr00944	pathway	Flavone and flavonol biosynthesis - Eucalyptu...	0.00173009
M00027	module	GABA (gamma-Aminobutyrate) shunt	4.27183e-05
M00039	module	Monolignol biosynthesis, phenylalanine/tyrosi…	3.5175e-05
M00123	module	Biotin biosynthesis, pimeloyl-ACP/CoA => biot...	0.000162496
M00168	module	CAM (Crassulacean acid metabolism), dark	2.86981e-05
M00169	module	CAM (Crassulacean acid metabolism), light	2.92311e-06
M00170	module	C4-dicarboxylic acid cycle, phosphoenolpyruva...	1.46276e-05
M00171	module	C4-dicarboxylic acid cycle, NAD - malic enzym...	3.65665e-05
M00172	module	C4-dicarboxylic acid cycle, NADP - malic enzy...	1.96683e-05
1.1.1.195	enzyme	cinnamyl-alcohol dehydrogenase	1e-06
1.1.1.22	enzyme	UDP-glucose 6-dehydrogenase	0.00234317
1.1.1.300	enzyme	NADP-retinol dehydrogenase	1e-06
1.1.1.40	enzyme	malate dehydrogenase (oxaloacetate-decarboxyl...	0.00275382
1.14.11.2	enzyme	procollagen-proline 4-dioxygenase	1e-06
1.2.1.24	enzyme	succinate-semialdehyde dehydrogenase (NAD+)	0.00905215
1.2.1.31	enzyme	L-aminoadipate-semialdehyde dehydrogenase	1.25221e-06
1.2.1.44	enzyme	cinnamoyl-CoA reductase	1e-06
1.2.1.68	enzyme	coniferyl-aldehyde dehydrogenase	1.74351e-05
1.4.3.16	enzyme	L-aspartate oxidase	0.00241235
1.4.3.5	enzyme	pyridoxal 5'-phosphate synthase	6.05115e-05
1.5.1.2	enzyme	pyrroline-5-carboxylate reductase	0.0045902
1.5.5.2	enzyme	proline dehydrogenase	6.55406e-06
2.1.3.3	enzyme	ornithine carbamoyltransferase	0.00109838
2.3.1.133	enzyme	shikimate O-hydroxycinnamoyltransferase	0.00118438
2.3.1.47	enzyme	8-amino-7-oxononanoate synthase	1e-06
2.3.1.76	enzyme	retinol O-fatty-acyltransferase	1e-06
2.3.1.87	enzyme	aralkylamine N-acetyltransferase	1e-06
2.4.1.225	enzyme	N-acetylglucosaminyl-proteoglycan 4-beta-gluc...	0.00752301
2.4.1.228	enzyme	lactosylceramide 4-alpha-galactosyltransferas...	0.0032694
2.4.1.239	enzyme	flavonol-3-O-glucoside glucosyltransferase	1e-06
2.4.1.25	enzyme	4-alpha-glucanotransferase	1.68661e-05
2.6.1.2	enzyme	alanine transaminase	2.21075e-06
2.6.1.4	enzyme	glycine transaminase	0.000758702
2.6.1.42	enzyme	branched-chain-amino-acid transaminase	0.000298857
2.6.1.44	enzyme	alanine---glyoxylate transaminase	0.00597235
2.6.1.51	enzyme	serine---pyruvate transaminase	0.00252519
2.6.1.62	enzyme	adenosylmethionine---8-amino-7-oxononanoate t...	0.00244925
2.6.1.96	enzyme	4-aminobutyrate---pyruvate transaminase	2.34631e-06
2.6.1.99	enzyme	L-tryptophan---pyruvate aminotransferase	0.00596236
2.7.1.35	enzyme	pyridoxal kinase	1e-06
2.7.1.82	enzyme	ethanolamine kinase	0.000394267
2.7.4.22	enzyme	UMP kinase	2.01412e-05
2.7.7.12	enzyme	UDP-glucose---hexose-1-phosphate uridylyltran...	0.00691681
2.7.9.1	enzyme	pyruvate, phosphate dikinase	7.79273e-05
3.1.2.6	enzyme	hydroxyacylglutathione hydrolase	1e-06
3.1.3.3	enzyme	phosphoserine phosphatase	0.000340684
3.1.3.74	enzyme	pyridoxal phosphatase	1e-06
3.2.1.1	enzyme	alpha-amylase	0.00165952
3.2.1.2	enzyme	beta-amylase	0.00165952
3.4.11.5	enzyme	prolyl aminopeptidase	0.00198361
3.5.1.26	enzyme	N4-(beta-N-acetylglucosaminyl)-L-asparaginase	1e-06
3.5.3.1	enzyme	arginase	1e-06
3.5.4.4	enzyme	adenosine deaminase	0.00294568
4.1.1.31	enzyme	phosphoenolpyruvate carboxylase	6.05029e-05
4.4.1.5	enzyme	lactoylglutathione lyase	1e-06
5.1.1.18	enzyme	serine racemase	0.000216134
6.3.3.3	enzyme	dethiobiotin synthase	0.00741093
6.3.5.4	enzyme	asparagine synthase (glutamine-hydrolysing)	0.00235147
R00028	reaction	maltose glucohydrolase	1e-06
R00135	reaction	Peptide + H2O <=> L-Proline + Peptide	0.00726571
R00155	reaction	UDP phosphohydrolase	1e-06
R00156	reaction	ATP:UDP phosphotransferase	0.000884374
R00158	reaction	ATP:UMP phosphotransferase	1e-06
R00159	reaction	UTP phosphohydrolase	0.00139043
R00173	reaction	pyridoxal-5'-phosphate phosphohydrolase	0.00899661
R00174	reaction	ATP:pyridoxal 5'-phosphotransferase	0.00695937
R00221	reaction	D-serine ammonia-lyase	0.00015801
R00258	reaction	L-Alanine:2-oxoglutarate aminotransferase	1e-06
R00261	reaction	L-glutamate 1-carboxy-lyase (4-aminobutanoate...	1e-06
R00277	reaction	Pyridoxamine-5'-phosphate:oxygen oxidoreducta...	1e-06
R00286	reaction	UDP-glucose:NAD+ 6-oxidoreductase	0.00146567
R00287	reaction	UDP-glucose glucophosphohydrolase	1e-06
R00289	reaction	UTP:alpha-D-glucose-1-phosphate uridylyltrans...	0.00139994
R00291	reaction	UDP-glucose 4-epimerase	1e-06
R00292	reaction	UDP-glucose:glycogen 4-alpha-D-glucosyltransf...	0.00595679
R00330	reaction	ATP:GDP phosphotransferase	0.00805065
R00355	reaction	L-Aspartate:2-oxoglutarate aminotransferase	1e-06
R00357	reaction	L-Aspartic acid:oxygen oxidoreductase (deamin...	1e-06
R00359	reaction	D-Aspartate:oxygen oxidoreductase (deaminatin...	1e-06
R00369	reaction	L-Alanine:glyoxylate aminotransferase	0.000922808
R00396	reaction	L-alanine:NAD+ oxidoreductase (deaminating)	5.798e-05
R00397	reaction	L-aspartate 4-carboxy-lyase (L-alanine-formin...	1e-06
R00400	reaction	L-alanine:oxaloacetate aminotransferase	1e-06
R00431	reaction	GTP:oxaloacetate carboxy-lyase (adding GTP;ph...	0.00917902
R00483	reaction	L-aspartate:ammonia ligase (AMP-forming)	0.00578902
R00485	reaction	L-asparagine amidohydrolase	0.00869768
R00489	reaction	L-aspartate 1-carboxy-lyase (beta-alanine-for...	1e-06
R00490	reaction	L-aspartate ammonia-lyase (fumarate-forming)	2.04937e-05
R00491	reaction	aspartate racemase	1e-06
R00501	reaction	UDP-alpha-D-galactose:NAD+ 6-oxidoreductase	0.00728719
R00503	reaction	UDP-alpha-D-galactose:D-glucose 4-beta-D-gala...	0.00532846
R00551	reaction	L-Arginine amidinohydrolase	1e-06
R00578	reaction	L-aspartate:L-glutamine amido-ligase (AMP-for...	0.00433298
R00589	reaction	serine racemase	0.000287447
R00662	reaction	Uridine triphosphate pyrophosphohydrolase	3.21486e-05
R00667	reaction	L-Ornithine:2-oxo-acid aminotransferase	7.6241e-05
R00669	reaction	N2-Acetyl-L-ornithine amidohydrolase	0.00819596
R00670	reaction	L-ornithine carboxy-lyase (putrescine-forming...	1e-06
R00671	reaction	L-ornithine ammonia-lyase (cyclizing	1e-06
R00672	reaction	ornithine racemase	0.000385133
R00734	reaction	L-tyrosine:2-oxoglutarate aminotransferase	0.00117962
R00748	reaction	ethanolamine-phosphate phosphate-lyase (deami...	1e-06
R00907	reaction	L-Alanine:3-oxopropanoate aminotransferase	0.00280103
R00955	reaction	UDP-glucose:alpha-D-galactose-1-phosphate uri...	0.00410225
R00963	reaction	uridine 5'-monophosphate phosphohydrolase	8.5617e-05
R00964	reaction	ATP:uridine 5'-phosphotransferase	0.000201237
R00966	reaction	UMP:diphosphate phospho-alpha-D-ribosyltransf...	0.0027532
R00967	reaction	UTP:uridine 5'-phosphotransferase	2.12589e-05
R00968	reaction	GTP:uridine 5'-phosphotransferase	4.53615e-05
R00970	reaction	ITP:uridine 5'-phosphotransferase	0.00719072
R01088	reaction	L-leucine:NAD+ oxidoreductase (deaminating)	1e-06
R01090	reaction	L-Leucine:2-oxoglutarate aminotransferase	1e-06
R01126	reaction	inosine 5'-monophosphate phosphohydrolase	1e-06
R01131	reaction	ATP:inosine 5'-phosphotransferase	1e-06
R01246	reaction	L-proline:NAD+ 2-oxidoreductase	1e-06
R01248	reaction	L-Proline:NAD+ 5-oxidoreductase	1e-06
R01249	reaction	L-proline:NADP+ 2-oxidoreductase	1e-06
R01251	reaction	L-Proline:NADP+ 5-oxidoreductase	1e-06
R01252	reaction	L-Proline,2-oxoglutarate:oxygen oxidoreductas...	1e-06
R01253	reaction	L-proline:quinone oxidoreductase	2.61224e-05
R01255	reaction	proline racemase	1e-06
R01268	reaction	Nicotinamide amidohydrolase	3.66719e-05
R01293	reaction	4-hydroxybenzaldehyde:NAD+ oxidoreductase	0.000350727
R01295	reaction	benzoate,[reduced NADPH---hemoprotein reducta...	2.21943e-05
R01296	reaction	4-hydroxybenzoate,NADH:oxygen oxidoreductase ...	0.000570079
R01298	reaction	4-hydroxybenzoate,NADPH:oxygen oxidoreductase...	0.000878792
R01300	reaction	4-hydroxybenzoate:CoA ligase (AMP-forming)	0.00279564
R01301	reaction	4-Hydroxybenzoyl-CoA hydrolase	0.00419602
R01302	reaction	chorismate pyruvate-lyase (4-hydroxybenzoate-...	0.000119824
R01383	reaction	UDPglucuronate beta-D-glucuronosyltransferase...	1e-06
R01398	reaction	Carbamoyl-phosphate:L-ornithine carbamoyltran...	7.1057e-05
R01468	reaction	ATP:ethanolamine O-phosphotransferase	1e-06
R01478	reaction	beta-D-glucuronoside glucuronosohydrolase	1e-06
R01500	reaction	UDP-alpha-D-galactose:N-acylsphingosine D-gal...	0.00084807
R01555	reaction	Maltose:phosphate 1-beta-D-glucosyltransferas...	0.00206661
R01557	reaction	Maltose alpha-D-glucosylmutase	1e-06
R01560	reaction	Adenosine aminohydrolase	1e-06
R01580	reaction	Pyridoxamine-5'-phosphate:2-oxoglutarate amin...	1e-06
R01648	reaction	4-aminobutanoate:2-oxoglutarate aminotransfer...	1e-06
R01712	reaction	pyridoxamine:pyruvate aminotransferase	0.00289444
R01713	reaction	Pyridoxamine:oxaloacetate aminotransferase	0.000392348
R01720	reaction	nicotinate:NADP+ 6-oxidoreductase (hydroxylat...	0.00752263
R01724	reaction	5-phospho-alpha-D-ribose 1-diphosphate:nicoti...	0.000433027
R01736	reaction	(R)-S-Lactoylglutathione hydrolase	1e-06
R01770	reaction	Inosine ribohydrolase	1e-06
R01844	reaction	ATP:sedoheptulose 7-phosphate	1e-06
R01863	reaction	inosine:phosphate alpha-D-ribosyltransferase	1e-06
R01872	reaction	L-quinate:NAD+ 3-oxidoreductase	1e-06
R01873	reaction	Quinate:pyrroloquinoline-quinone 3-oxidoreduc...	0.000715174
R01939	reaction	L-2-aminoadipate:2-oxoglutarate aminotransfer...	1e-06
R01945	reaction	Caffeoyl-CoA:quinate O-(3,4-dihydroxycinnamoy...	0.000249961
R01986	reaction	4-Aminobutyraldehyde:NAD+ oxidoreductase	1.10882e-05
R01989	reaction	L-Arginine:4-aminobutanoate amidinotransferas...	1e-06
R01990	reaction	4-Guanidinobutanoate amidinohydrolase	0.000888491
R01991	reaction	L-histidine:4-aminobutanoate ligase (ADP-form...	0.000490515
R01992	reaction	alpha-Aminobutyryl histidine hydrolase	0.000641142
R02038	reaction	CTP:ethanolamine-phosphate cytidylyltransfera...	0.00124013
R02052	reaction	Phosphatidylethanolamine ethanolaminephosphoh...	1.77429e-05
R02124	reaction	retinol:NAD+ oxidoreductase	1e-06
R02158	reaction	UDPglucose:flavonol 3-O-D-glucosyltransferase	0.00382828
R02160	reaction	dihydroflavonol,2-oxoglutarate:oxygen oxidore...	1e-06
R02196	reaction	L-Isoleucine:NAD+ oxidoreductase(deaminating)	1e-06
R02197	reaction	L-Isoleucine:oxygen oxidoreductase (deaminati...	1e-06
R02199	reaction	L-Isoleucine:2-oxoglutarate aminotransferase	1e-06
R02220	reaction	sinapoyl aldehyde:NADP+ oxidoreductase (CoA-s...	1.31646e-06
R02273	reaction	5-aminopentanamide amidohydrolase	4.20952e-06
R02274	reaction	5-aminopentanoate:2-oxoglutarate aminotransfe...	2.27266e-06
R02276	reaction	5-Acetamidopentanoate amidohydrolase	1e-06
R02279	reaction	5-Dehydro-4-deoxy-D-glucarate hydro-lyase (de...	0.000163244
R02295	reaction	Nicotinate D-ribonucleoside:orthophosphate ri...	0.00826482
R02382	reaction	Tyramine:oxygen oxidoreductase(deaminating)(f...	1e-06
R02493	reaction	ATP:pyridoxal 5'-phosphotransferase	1e-06
R02494	reaction	pyridoxamine-5'-phosphate phosphohydrolase	1e-06
R02506	reaction	cinnamaldehyde:NADP+ oxidoreductase (CoA-cinn...	1e-06
R02530	reaction	(R)-S-Lactoylglutathione methylglyoxal-lyase ...	1e-06
R02549	reaction	4-aminobutanal:NAD+ 1-oxidoreductase	6.78347e-06
R02691	reaction	UDP-alpha-D-galactose:1,2-diacyl-sn-glycerol ...	0.00283027
R02695	reaction	4-Hydroxyphenylacetaldehyde:NAD+ oxidoreducta...	1e-06
R02697	reaction	4-Hydroxyphenylacetaldehyde:NADP+ oxidoreduct...	1e-06
R02752	reaction	D-Glucarate hydro-lyase	1e-06
R02754	reaction	5-Dehydro-4-deoxy-D-glucarate tartronate-semi...	8.1753e-05
R02825	reaction	5-Aminopentanoate <=> D-Proline	1e-06
R02854	reaction	D-Serine + Amino acid(Arg-) <=> D-Lombricine ...	1e-06
R02894	reaction	D-Proline:oxygen oxidoreductase	1e-06
R02895	reaction	D-Proline + L-Glutamine <=> Linatine	0.00264606
R02911	reaction	acetyl-CoA:aralkylamine N-acetyltransferase	1e-06
R02957	reaction	D-Glucuronolactone:NAD+ oxidoreductase	1e-06
R03102	reaction	L-2-aminoadipate-6-semialdehyde:NAD+ 6-oxidor...	1e-06
R03103	reaction	L-2-aminoadipate-6-semialdehyde:NADP+ 6-oxido...	1e-06
R03124	reaction	dihydrokaempferol,[reduced NADPH---hemoprotei...	1e-06
R03130	reaction	S-Adenosyl-L-homocysteine:N-acetylserotonin O...	1e-06
R03210	reaction	6-Carboxyhexanoyl-CoA:L-alanine C-carboxyhexa...	1e-06
R03231	reaction	S-Adenosyl-L-methionine:8-amino-7-oxononanoat...	0.00561748
R03341	reaction	4-hydroxyphenylpyruvate carboxy-lyase	1e-06
R03369	reaction	3-(2-hydroxyphenyl)propanoate,NADH2:oxygen ox...	1e-06
R03378	reaction	GTP:5-hydroxy-L-lysine O-phosphotransferase	1e-06
R03439	reaction	kynurenate:oxygen oxidoreductase (hydroxylati...	1e-06
R03440	reaction	kynurenate:oxygen oxidoreductase (hydroxylati...	1e-06
R03445	reaction	4-(2-Aminophenyl)-2,4-dioxobutanoate <=> 4-Hy...	1e-06
R03452	reaction	(6aR,11aR)-3,9-dihydroxypterocarpan,[reduced ...	1e-06
R03531	reaction	2'-Deoxyinosine-5'-triphosphate pyrophosphohy...	1e-06
R03542	reaction	alpha-Aminopropiononitrile aminohydrolase	1e-06
R03629	reaction	substrate,reduced-flaboprotein:oxygen oxidore...	1e-06
R03636	reaction	leucocyanidin:NADP+ 4-oxidoreductase	2.96677e-06
R03639	reaction	taxifolin,[reduced NADPH---hemoprotein reduct...	2.40036e-06
R03640	reaction	flavanone,2-oxoglutarate:oxygen oxidoreductas...	1e-06
R03686	reaction	UDPglucose:isovitexin 2''-O-beta-D-glucosyltr...	1e-06
R03709	reaction	3-(2-Hydroxyphenyl)propanoate:NAD+ oxidoreduc...	1e-06
R03889	reaction	2-Aminomuconate semialdehyde:NAD+ 6-oxidoredu...	0.00187425
R03918	reaction	Sinapyl alcohol:NADP+ oxidoreductase	1e-06
R03935	reaction	beta-Alanyl-L-arginine hydrolase	0.00574352
R04029	reaction	N6-acetyl-L-lysine:2-oxoglutarate aminotransf...	1e-06
R04111	reaction	protein-N(pi)-phosphohistidine:maltose 6'-pho...	0.00494516
R04142	reaction	5-Acetamidopentanoate + NADH + H+ + CO2 <=> 6...	1e-06
R04174	reaction	6-Acetamido-2-oxohexanoate amidohydrolase	1e-06
R04304	reaction	4-Hydroxyphenylethanol:NAD+ oxidoreductase	1e-06
R04323	reaction	2-Amino-3-carboxymuconate semialdehyde carbox...	0.00656726
R04899	reaction	3-(2-Hydroxyphenyl)propanoate <=> Phenylpropa...	1e-06
R05053	reaction	D-aspartate:2-oxoglutarate aminotransferase	1e-06
R05083	reaction	UDP-glucose:4-hydroxyphenylethanol 1-O-beta-D...	1e-06
R05196	reaction	1,4-alpha-D-Glucan:1,4-alpha-D-glucan 4-alpha...	1.08973e-06
R05354	reaction	styrene cis-glycol:NAD+ oxidoreductase	1e-06
R05356	reaction	2-Hydroxy-cyclohexan-1-one amidohydrolase	4.03987e-06
R05417	reaction	Styrene + Oxygen + NADH + H+ <=> Styrene-cis-...	1e-06
R05507	reaction	6-Aminohexanoate + 2-Oxoglutarate <=> Adipate...	1e-06
R05608	reaction	galactarate hydro-lyase (5-dehydro-4-deoxy-D-...	1e-06
R05723	reaction	leucocyanidin,2-oxoglutarate:oxygen oxidoredu...	1.65203e-06
R05840	reaction	Glycolaldehyde + 2-Oxobutanoate + Alanine <=>...	1e-06
R05935	reaction	UDP-D-glucuronate + G00162 <=> UDP + G00163	0.00752301
R05960	reaction	UDP-D-galactose + Lactosylceramide <=> UDP + ...	0.0032694
R06576	reaction	S-adenosyl-L-methionine:3,4-dihydroxy-trans-c...	1e-06
R06812	reaction	UDP-glucose:flavonol-3-O-glucoside 2''-O-beta...	1e-06
R06813	reaction	UDP-glucose:flavonol-3-O-beta-D-glucosyl-(1->...	1e-06
R06825	reaction	Apigenin <=> Isovitexin	1e-06
R06846	reaction	L-quinate:NADP+ 3-oxidoreductase	1e-06
R06870	reaction	Phosphoethanolamine phosphohydrolase	1e-06
R06886	reaction	4,4'-Dihydroxy-alpha-methylstilbene + Oxygen ...	1e-06
R06892	reaction	(4-hydroxyphenyl)ethan-1-one,NADPH:oxygen oxi...	1e-06
R07271	reaction	dimethylallyl-diphosphate:(6aS,11aS)-3,6a,9-t...	1e-06
R07272	reaction	dimethylallyl-diphosphate:(6aS,11aS)-3,6a,9-t...	1e-06
R07419	reaction	4-(gamma-L-glutamylamino)butanoate amidohydro...	0.00553017
R07432	reaction	p-coumaroyl-CoA:quinate hydroxycinnamoyltrans...	0.000206051
R07441	reaction	sinapoyl aldehyde:NAD oxidoreductase	1e-06
R07442	reaction	sinapoyl aldehyde:NADP oxidoreductase	1e-06
R08021	reaction	UDP-glucose:flavanone 7-O-beta-D-glucosyltran...	0.00815387
R08022	reaction	UDP-L-rhamnose:hesperetin-7-O-glucoside 2''-O...	1e-06
R08056	reaction	D-glucarate hydro-lyase	1e-06
R08197	reaction	L-arginine:pyruvate aminotransferase	0.00500059
R08379	reaction	retinol: NADP+ oxidoreductase	1e-06
R08411	reaction	L-Leucine <=> 3-Methylbutanoic acid	0.00685335
R08615	reaction	UDP-glucuronate glucuronohydrolase	0.0027429
R09254	reaction	L-tyrosine:pyruvate aminotransferase	1.17631e-06
R09403	reaction	L-isoleucine,[reduced NADPH---hemoprotein red...	0.00783511
R09496	reaction	D-proline:acceptor oxidoreductase	1e-06
R09805	reaction	L-Aspartate-4-semialdehyde:NAD+ oxidoreductas...	0.00262673
R09830	reaction	L-Tyrosine:NAD+ oxidoreductase (deaminating)	0.00629957
R09945	reaction	ATP:alpha-maltose 1-phosphotransferase	0.00105571
R10046	reaction	nicotinate D-ribonucleoside ribohydrolase	0.00811093
R10124	reaction	pimeloyl-[acyl-carrier protein]:L-alanine C-p...	1e-06
R10178	reaction	4-aminobutanoate:pyruvate aminotransferase	1e-06
R10235	reaction	deoxyinosine diphosphate phosphatase	1e-06
R10270	reaction	(5R)-5-phosphooxy-L-lysine phosphate-lyase (d...	0.00177107
R10486	reaction	maltose 6'-phosphate phosphohydrolase	0.000682214
R10507	reaction	L-proline:(acceptor) oxidoreductase	4.26862e-06
R10686	reaction	Pyridoxal phosphate + L-Histidine <=> 4-Amino...	0.00402254
R10699	reaction	L-lysine:8-amino-7-oxononanoate aminotransfer...	1e-06
R11022	reaction	2-Aminomuconate semialdehyde <=> Picolinic ac...	1e-06
R11210	reaction	(-)-yatein,2-oxoglutarate:oxygen oxidoreducta...	1e-06
R11262	reaction	maltodextrin maltohydrolase	0.000112806
R11306	reaction	UDP-D-glucose:D-glucose 1-alpha-D-glucosyltra...	0.00162415
R11375	reaction	UDP-D-galactose + Paragloboside <=> UDP + IV4...	0.0032694
R11376	reaction	UDP-D-galactose + Globoside <=> UDP + IV4-alp...	0.0032694
R11377	reaction	UDP-D-galactose + NORint <=> UDP + NOR2 antig...	0.0032694
R11545	reaction	S-adenosyl-L-methionine:(-)-5'-demethylyatein...	1e-06
R11679	reaction	(S)-2-amino-6-oxohexanoate:NADP+ oxidoreducta...	1e-06
R11917	reaction	L-tyrosine carboxy-lyase (oxidative-deaminati...	1e-06
R12215	reaction	5-aminopentanal:NAD+ 1-oxidoreductase	1e-06
C00015	compound	UDP	0.00028811
C00029	compound	UDP-glucose	8.00718e-06
C00041	compound	L-Alanine	1e-06
C00049	compound	L-Aspartate	1e-06
C00052	compound	UDP-alpha-D-galactose	1e-06
C00077	compound	L-Ornithine	1e-06
C00082	compound	L-Tyrosine	1e-06
C00105	compound	UMP	1.30919e-06
C00123	compound	L-Leucine	1e-06
C00135	compound	L-Histidine	1e-06
C00148	compound	L-Proline	1e-06
C00156	compound	4-Hydroxybenzoate	1e-06
C00208	compound	Maltose	1e-06
C00253	compound	Nicotinate	1e-06
C00294	compound	Inosine	1e-06
C00296	compound	Quinate	1e-06
C00334	compound	4-Aminobutanoate	1e-06
C00346	compound	Ethanolamine phosphate	1e-06
C00402	compound	D-Aspartate	1e-06
C00407	compound	L-Isoleucine	1e-06
C00431	compound	5-Aminopentanoate	1e-06
C00473	compound	Retinol	1e-06
C00647	compound	Pyridoxamine phosphate	1e-06
C00679	compound	5-Dehydro-4-deoxy-D-glucarate	1.25106e-05
C00740	compound	D-Serine	0.000257882
C00763	compound	D-Proline	1e-06
C00818	compound	D-Glucarate	1e-06
C00879	compound	D-Galactarate	1e-06
C00903	compound	Cinnamaldehyde	1e-06
C00956	compound	L-2-Aminoadipate	1e-06
C00978	compound	N-Acetylserotonin	1e-06
C01092	compound	8-Amino-7-oxononanoate	1e-06
C01198	compound	3-(2-Hydroxyphenyl)propanoate	1e-06
C01263	compound	3,6,9-Trihydroxypterocarpan	1e-06
C01401	compound	Alanine	1e-06
C01477	compound	Apigenin	0.00229432
C01598	compound	Melatonin	0.00489308
C01602	compound	Ornithine	1e-06
C01617	compound	Taxifolin	1e-06
C01714	compound	Isovitexin	1e-06
C01717	compound	4-Hydroxy-2-quinolinecarboxylic acid	1e-06
C01726	compound	D-Lombricine	0.000905546
C02076	compound	Sedoheptulose	1e-06
C02199	compound	UDP-L-rhamnose	0.00436967
C02378	compound	6-Aminohexanoate	1e-06
C02385	compound	Amino acid(Arg-)	0.000656602
C03033	compound	beta-D-Glucuronoside	1e-06
C03366	compound	5-Phosphooxy-L-lysine	0.00432932
C03451	compound	(R)-S-Lactoylglutathione	1e-06
C03765	compound	4-Hydroxyphenylacetaldehyde	1e-06
C03824	compound	2-Aminomuconate semialdehyde	0.000292805
C05548	compound	6-Acetamido-2-oxohexanoate	1e-06
C05610	compound	Sinapoyl aldehyde	1e-06
C05643	compound	6-Hydroxymelatonin	1e-06
C06044	compound	4-Hydroxyphenylethanol	0.00157267
C06046	compound	Salidroside	1e-06
C06196	compound	2'-Deoxyinosine 5'-phosphate	1e-06
C07084	compound	Styrene-cis-2,3-dihydrodiol	1e-06
C09806	compound	Neohesperidin	1e-06
C10164	compound	Picolinic acid	1e-06
C10557	compound	Dihydroanhydropodorhizol	1e-06
C10700	compound	4'-Hydroxyacetophenone	1e-06
C12667	compound	Quercetin 3-O-beta-D-glucosyl-(1->2)-beta-D-g...	1e-06
C16422	compound	Hesperetin 7-O-glucoside	0.00273385
C16741	compound	L-Hydroxylysine	1e-06

## Sheet: A.marina
KEGG.id	Entry.type	KEGG.name	p.score
egr00250	pathway	Alanine, aspartate and glutamate metabolism -...	0.0187192
egr00290	pathway	Valine, leucine and isoleucine biosynthesis -...	3.09347e-05
egr00310	pathway	Lysine degradation - Eucalyptus grandis (rose...	0.0139115
egr00330	pathway	Arginine and proline metabolism - Eucalyptus ...	1e-06
egr00620	pathway	Pyruvate metabolism - Eucalyptus grandis (ros...	0.000869945
egr00908	pathway	Zeatin biosynthesis - Eucalyptus grandis (ros...	0.000151984
egr00998	pathway	Biosynthesis of secondary metabolites - other...	0.0117841
egr00999	pathway	Biosynthesis of secondary metabolites - uncla...	1e-06
egr04075	pathway	Plant hormone signal transduction - Eucalyptu...	0.00287619
M00015	module	Proline biosynthesis, glutamate => proline	0.0107779
M00018	module	Threonine biosynthesis, aspartate => homoseri...	0.000512892
M00027	module	GABA (gamma-Aminobutyrate) shunt	1e-06
M00039	module	Monolignol biosynthesis, phenylalanine/tyrosi...	0.0265789
M00171	module	C4-dicarboxylic acid cycle, NAD - malic enzym...	0.037341
M00432	module	Leucine biosynthesis, 2-oxoisovalerate => 2-o...	2.73475e-06
1.1.1.3	enzyme	homoserine dehydrogenase	1e-06
1.1.1.85	enzyme	3-isopropylmalate dehydrogenase	2.74139e-06
1.1.2.4	enzyme	D-lactate dehydrogenase (cytochrome)	0.0488909
1.14.11.2	enzyme	procollagen-proline 4-dioxygenase	1e-06
1.14.14.91	enzyme	trans-cinnamate 4-monooxygenase	0.0069394
1.2.1.24	enzyme	succinate-semialdehyde dehydrogenase (NAD+)	2.60834e-05
1.2.1.68	enzyme	coniferyl-aldehyde dehydrogenase	1.33266e-06
1.4.1.14	enzyme	glutamate synthase (NADH)	1e-06
1.4.7.1	enzyme	glutamate synthase (ferredoxin)	1e-06
1.5.1.2	enzyme	pyrroline-5-carboxylate reductase	0.000122969
1.5.1.8	enzyme	saccharopine dehydrogenase (NADP+, L-lysine-f...	0.00298123
1.5.5.2	enzyme	proline dehydrogenase	1e-06
1.5.99.12	enzyme	cytokinin dehydrogenase	0.00355464
2.1.1.104	enzyme	caffeoyl-CoA O-methyltransferase	0.0143814
2.3.3.13	enzyme	2-isopropylmalate synthase	0.000248423
2.4.1.115	enzyme	anthocyanidin 3-O-glucosyltransferase	0.04071
2.4.1.207	enzyme	xyloglucan:xyloglucosyl transferase	0.00287619
2.4.1.215	enzyme	cis-zeatin O-beta-D-glucosyltransferase	1e-06
2.4.2.14	enzyme	amidophosphoribosyltransferase	0.0110515
2.6.1.16	enzyme	glutamine---fructose-6-phosphate transaminase...	0.000589384
2.6.1.2	enzyme	alanine transaminase	0.000444988
2.6.1.42	enzyme	branched-chain-amino-acid transaminase	0.000545298
2.6.1.44	enzyme	alanine---glyoxylate transaminase	0.0101612
2.6.1.96	enzyme	4-aminobutyrate---pyruvate transaminase	1e-06
2.6.1.99	enzyme	L-tryptophan---pyruvate aminotransferase	0.0197571
2.7.1.39	enzyme	homoserine kinase	2.41327e-06
2.7.10.1	enzyme	receptor protein-tyrosine kinase	0.0313876
2.7.13.3	enzyme	histidine kinase	0.00287619
3.1.2.6	enzyme	hydroxyacylglutathione hydrolase	1e-06
3.2.2.16	enzyme	methylthioadenosine nucleosidase	0.0435462
3.4.11.5	enzyme	prolyl aminopeptidase	6.84133e-05
3.5.3.1	enzyme	arginase	0.0158252
4.1.1.15	enzyme	glutamate decarboxylase	0.0047213
4.1.1.20	enzyme	diaminopimelate decarboxylase	0.0202631
4.2.1.130	enzyme	D-lactate dehydratase	0.00340409
4.2.1.33	enzyme	3-isopropylmalate dehydratase	1e-06
4.3.3.6	enzyme	pyridoxal 5'-phosphate synthase (glutamine hy...	7.45885e-05
4.4.1.5	enzyme	lactoylglutathione lyase	1e-06
6.2.1.12	enzyme	4-coumarate---CoA ligase	0.0467878
6.3.1.2	enzyme	glutamine synthetase	0.000114199
6.3.4.2	enzyme	CTP synthase (glutamine hydrolysing)	5.31189e-05
6.3.5.2	enzyme	GMP synthase (glutamine-hydrolysing)	0.00497801
6.3.5.4	enzyme	asparagine synthase (glutamine-hydrolysing)	0.000426358
6.3.5.5	enzyme	carbamoyl-phosphate synthase (glutamine-hydro...	0.00696096
R00021	reaction	L-glutamate:ferredoxin oxidoreductase (transa...	1e-06
R00031	reaction	1,2-benzenediol:oxygen oxidoreductase	0.000494714
R00070	reaction	D-urobilinogen:oxygen oxidoreductase	1e-06
R00093	reaction	L-glutamate:NAD+ oxidoreductase (transaminati...	1e-06
R00114	reaction	L-glutamate:NADP+ oxidoreductase (transaminat...	1e-06
R00135	reaction	Peptide + H2O <=> L-Proline + Peptide	0.000464527
R00182	reaction	AMP phosphoribohydrolase	1e-06
R00190	reaction	AMP:diphosphate phospho-D-ribosyltransferase	1e-06
R00203	reaction	pyruvaldehyde:NAD+ oxidoreductase	0.047145
R00205	reaction	2-Oxopropanal:NADP+ oxidoreductase	0.0379505
R00243	reaction	L-glutamate:NAD+ oxidoreductase (deaminating)	0.00226368
R00248	reaction	L-glutamate:NADP+ oxidoreductase (deaminating...	0.00827852
R00253	reaction	L-Glutamate:ammonia ligase (ADP-forming)	1e-06
R00256	reaction	L-glutamine amidohydrolase	1e-06
R00257	reaction	Deamido-NAD+:L-glutamine amido-ligase (AMP-fo...	0.00437769
R00258	reaction	L-Alanine:2-oxoglutarate aminotransferase	1e-06
R00260	reaction	glutamate racemase	0.000610695
R00261	reaction	L-glutamate 1-carboxy-lyase (4-aminobutanoate...	1e-06
R00279	reaction	D-Glutamate:oxygen oxidoreductase (deaminatin...	0.00732944
R00355	reaction	L-Aspartate:2-oxoglutarate aminotransferase	0.00299922
R00369	reaction	L-Alanine:glyoxylate aminotransferase	0.000131211
R00372	reaction	Glycine:2-oxoglutarate aminotransferase	0.0104945
R00396	reaction	L-alanine:NAD+ oxidoreductase (deaminating)	1.5478e-05
R00397	reaction	L-aspartate 4-carboxy-lyase (L-alanine-formin...	1e-06
R00400	reaction	L-alanine:oxaloacetate aminotransferase	1.59913e-05
R00401	reaction	alanine racemase	0.0289473
R00446	reaction	L-lysine:NAD+ 6-oxidoreductase (deaminating)	0.000148358
R00447	reaction	L-lysine:oxygen 2-oxidoreductase (deaminating...	0.0235562
R00449	reaction	L-lysine:oxygen 2-oxidoreductase (decarboxyla...	0.0228415
R00451	reaction	meso-2,6-diaminoheptanedioate carboxy-lyase (...	0.0215475
R00454	reaction	acetyl-CoA:L-lysine N6-acetyltransferase	0.00840062
R00458	reaction	N6-acetyl-L-lysine amidohydrolase	0.00774069
R00460	reaction	lysine racemase	0.0330689
R00462	reaction	L-lysine carboxy-lyase (cadaverine-forming)	0.00431144
R00573	reaction	UTP:L-glutamine amido-ligase (ADP-forming)	1e-06
R00575	reaction	HCO3-:L-glutamine amido-ligase (ADP-forming, ...	1.25442e-05
R00576	reaction	L-Glutamine:pyruvate aminotransferase	0.0153726
R00578	reaction	L-aspartate:L-glutamine amido-ligase (AMP-for...	0.000177526
R00579	reaction	glutamine racemase	1e-06
R00585	reaction	L-Serine:pyruvate aminotransferase	0.0237747
R00671	reaction	L-ornithine ammonia-lyase (cyclizing	1e-06
R00692	reaction	L-phenylalanine:pyruvate aminotransferase	0.00919086
R00694	reaction	L-Phenylalanine:2-oxoglutarate aminotransfera...	0.04217
R00707	reaction	(S)-1-pyrroline-5-carboxylate:NAD+ oxidoreduc...	0.0349308
R00708	reaction	(S)-1-pyrroline-5-carboxylate:NADP+ oxidoredu...	0.0300259
R00713	reaction	succinate-semialdehyde:NAD+ oxidoreductase	0.0168694
R00714	reaction	succinate-semialdehyde:NADP+ oxidoreductase	0.013407
R00715	reaction	N6-(L-1,3-Dicarboxypropyl)-L-lysine:NAD+ oxid...	0.00686993
R00716	reaction	N6-(L-1,3-Dicarboxypropyl)-L-lysine:NADP+ oxi...	0.00644908
R00729	reaction	L-Tyrosine:oxygen oxidoreductase (deaminating...	0.00283021
R00731	reaction	L-Tyrosine:oxygen oxidoreductase	0.00158515
R00732	reaction	L-arogenate:NAD+ oxidoreductase	0.0360063
R00733	reaction	L-arogenate:NADP+ oxidoreductase	0.0330471
R00734	reaction	L-tyrosine:2-oxoglutarate aminotransferase	5.10296e-06
R00736	reaction	L-tyrosine carboxy-lyase (tyramine-forming)	0.02361
R00737	reaction	L-tyrosine ammonia-lyase (trans-p-hydroxycinn...	0.0159465
R00768	reaction	L-glutamine:D-fructose-6-phosphate isomerase ...	0.000119679
R00907	reaction	L-Alanine:3-oxopropanoate aminotransferase	0.0023695
R00908	reaction	beta-alanine:2-oxoglutarate aminotransferase	0.0458397
R00986	reaction	Chorismate pyruvate-lyase (amino-accepting)	1.28553e-05
R01072	reaction	5-phosphoribosylamine:diphosphate phospho-alp...	0.0112948
R01148	reaction	D-Alanine:2-oxoglutarate aminotransferase	0.0460267
R01155	reaction	putrescine:2-oxoglutarate aminotransferase	0.0245578
R01213	reaction	acetyl-CoA:3-methyl-2-oxobutanoate C-acetyltr...	0.0156464
R01214	reaction	L-Valine:2-oxoglutarate aminotransferase	1e-06
R01215	reaction	L-Valine:pyruvate aminotransferase	1e-06
R01231	reaction	Xanthosine-5'-phosphate:L-glutamine amido-lig...	0.000733536
R01244	reaction	Adenine aminohydrolase	1e-06
R01245	reaction	Adenosine ribohydrolase	1e-06
R01246	reaction	L-proline:NAD+ 2-oxidoreductase	1e-06
R01248	reaction	L-Proline:NAD+ 5-oxidoreductase	1e-06
R01249	reaction	L-proline:NADP+ 2-oxidoreductase	1e-06
R01251	reaction	L-Proline:NADP+ 5-oxidoreductase	1e-06
R01252	reaction	L-Proline,2-oxoglutarate:oxygen oxidoreductas...	1e-06
R01253	reaction	L-proline:quinone oxidoreductase	1e-06
R01255	reaction	proline racemase	1e-06
R01401	reaction	methylthioadenosine methylthioribohydrolase	0.0227412
R01402	reaction	S-methyl-5'-thioadenosine:phosphate S-methyl-...	0.0029424
R01434	reaction	L-valine:NAD+ oxidoreductase(deaminating)	1e-06
R01561	reaction	adenosine:phosphate alpha-D-ribosyltransferas...	1e-06
R01579	reaction	D-Glutamine amidohydrolase	1e-06
R01620	reaction	acetyl-phosphate:L-lysine N6-acetyltransferas...	0.0122142
R01648	reaction	4-aminobutanoate:2-oxoglutarate aminotransfer...	1e-06
R01712	reaction	pyridoxamine:pyruvate aminotransferase	0.0298221
R01736	reaction	(R)-S-Lactoylglutathione hydrolase	1e-06
R01771	reaction	ATP:L-homoserine O-phosphotransferase	1.91841e-06
R01773	reaction	L-Homoserine:NAD+ oxidoreductase	1e-06
R01775	reaction	L-homoserine:NADP+ oxidoreductase	1e-06
R01776	reaction	Acetyl-CoA:L-homoserine O-acetyltransferase	1e-06
R01777	reaction	Succinyl-CoA:L-homoserine O-succinyltransfera...	1e-06
R01795	reaction	L-Phenylalanine,tetrahydrobiopterin:oxygen ox...	0.0306587
R01815	reaction	L-Tyrosine,tetrahydrobiopterin:oxygen oxidore...	0.0302682
R01986	reaction	4-Aminobutyraldehyde:NAD+ oxidoreductase	1e-06
R01987	reaction	4-acetamidobutanoate amidohydrolase	0.00507037
R01989	reaction	L-Arginine:4-aminobutanoate amidinotransferas...	5.17644e-06
R01990	reaction	4-Guanidinobutanoate amidinohydrolase	6.59154e-06
R01991	reaction	L-histidine:4-aminobutanoate ligase (ADP-form...	0.00423578
R01992	reaction	alpha-Aminobutyryl histidine hydrolase	0.00457811
R02193	reaction	Coniferyl aldehyde:NADP+ oxidoreductase (CoA-...	1e-06
R02225	reaction	ATP:streptomycin 6-phosphotransferase	1e-06
R02228	reaction	Streptomycin-6-phosphate phosphohydrolase	1e-06
R02273	reaction	5-aminopentanamide amidohydrolase	1e-06
R02274	reaction	5-aminopentanoate:2-oxoglutarate aminotransfe...	1e-06
R02276	reaction	5-Acetamidopentanoate amidohydrolase	1e-06
R02445	reaction	flavanone,2-oxoglutarate:oxygen oxidoreductas...	0.0123418
R02530	reaction	(R)-S-Lactoylglutathione methylglyoxal-lyase ...	1e-06
R02549	reaction	4-aminobutanal:NAD+ 1-oxidoreductase	1e-06
R02557	reaction	Deoxyadenosine:orthophosphate ribosyltransfer...	0.00223859
R02593	reaction	coniferyl alcohol:NADP+ oxidoreductase	1e-06
R02825	reaction	5-Aminopentanoate <=> D-Proline	1e-06
R02894	reaction	D-Proline:oxygen oxidoreductase	1e-06
R02895	reaction	D-Proline + L-Glutamine <=> Linatine	4.91613e-06
R03130	reaction	S-Adenosyl-L-homocysteine:N-acetylserotonin O...	1e-06
R03542	reaction	alpha-Aminopropiononitrile aminohydrolase	1e-06
R03574	reaction	UDPglucose:5,7,3',4'-tetrahydroxyflavone 7-O-...	1e-06
R03628	reaction	melatonin:oxygen 2,3-dioxygenase (indole-decy...	1.03416e-05
R03629	reaction	substrate,reduced-flaboprotein:oxygen oxidore...	3.1638e-06
R03968	reaction	2-Isopropylmalate hydro-lyase	0.00820005
R04001	reaction	3-Isopropylmalate hydro-lyase	1e-06
R04426	reaction	(2R,3S)-3-isopropylmalate:NAD+ oxidoreductase	1e-06
R04526	reaction	UDP-apiose:apigenin 7-O-beta-D-glucoside 2''-...	1e-06
R04870	reaction	L-2-aminohexanedioate:L-cysteine:L-valine lig...	0.00633126
R04979	reaction	Bilirubin beta-diglucuronide glucuronosohydro...	0.0418628
R05356	reaction	2-Hydroxy-cyclohexan-1-one amidohydrolase	1e-06
R05470	reaction	Clavaminic acid <=> Clavulanate-9-aldehyde	0.021726
R05471	reaction	clavulanate:NADP+ oxidoreductase	1e-06
R05507	reaction	6-Aminohexanoate + 2-Oxoglutarate <=> Adipate...	1e-06
R05515	reaction	Streptomycin 6-phosphate + NADH + H+ <=> Dihy...	0.0444416
R05652	reaction	taurine:pyruvate aminotransferase	0.0403296
R05700	reaction	Coniferyl aldehyde:NAD oxidoreductase	1e-06
R05701	reaction	Coniferyl aldehyde:NADP oxidoreductase	1e-06
R05702	reaction	dihydrozeatin:NADP oxidoreductase	1e-06
R05708	reaction	N6-dimethylallyladenine:(acceptor) oxidoreduc...	0.0301964
R05772	reaction	trans-feruloyl-CoA hydratase	0.00534759
R05773	reaction	3-hydroxy-3-(4-hydroxy-3-methoxyphenyl)propio...	1e-06
R05840	reaction	Glycolaldehyde + 2-Oxobutanoate + Alanine <=>...	1e-06
R06256	reaction	D-Urobilinogen + 2 H+ <=> I-Urobilinogen	0.0295322
R06535	reaction	UDP-glucose:anthocyanidin 3-O-D-glucosyltrans...	0.00375611
R06544	reaction	4-hydroxycinnamoyl-CoA:cyanidin-3-O-glucoside...	0.037165
R06546	reaction	UDP-alpha-D-glucose:cyanidin-3-O-beta-D-gluco...	0.00152964
R06548	reaction	Chrysanthemin <=> Peonidin 3-O-glucoside	1e-06
R06572	reaction	Coniferyl aldehyde + NADPH + H+ + Oxygen <=> ...	1e-06
R06574	reaction	caffeic aldehyde:3,4-dihydroxy-trans-cinnamat...	1e-06
R06746	reaction	L-proline:[peptidyl-carrier protein] ligase (...	0.0451187
R06817	reaction	malonyl-CoA:anthocyanidin-3-O-beta-D-glucosid...	0.018104
R06818	reaction	Chrysanthemin + UDP-L-rhamnose <=> Cyanidin 3...	0.0256581
R06826	reaction	UDP-L-rhamnose:apigenin 7-O-beta-D-glucoside ...	4.55202e-06
R07260	reaction	UDP-glucose:cis-zeatin O-beta-D-glucosyltrans...	1e-06
R07419	reaction	4-(gamma-L-glutamylamino)butanoate amidohydro...	2.15772e-05
R07456	reaction	D-ribulose 5-phosphate,D-glyceraldehyde 3-pho...	5.81654e-05
R08074	reaction	Dihydrozeatin riboside + H2O <=> Dihydrozeati...	1e-06
R08076	reaction	Dihydrozeatin + UDP-glucose <=> Dihydrozeatin...	1.56942e-05
R08080	reaction	cis-Zeatin riboside + H2O <=> cis-Zeatin + D-...	1e-06
R08197	reaction	L-arginine:pyruvate aminotransferase	0.00204249
R08461	reaction	vanillylamine:succinate-semialdehyde aminotra...	1e-06
R08663	reaction	L-valine,[reduced NADPH---hemoprotein reducta...	0.000371636
R08714	reaction	putrescine:pyruvate aminotransferase	0.00247377
R09254	reaction	L-tyrosine:pyruvate aminotransferase	1e-06
R09280	reaction	succinate-semialdehyde:NADP+ oxidoreductase (...	0.033746
R09496	reaction	D-proline:acceptor oxidoreductase	1e-06
R09791	reaction	S-adenosyl-L-methionine:(2S)-5,7,4'-trihydrox...	1e-06
R09796	reaction	(R)-lactate hydro-lyase	0.00720121
R09830	reaction	L-Tyrosine:NAD+ oxidoreductase (deaminating)	0.00192976
R09860	reaction	androsta-1,4-diene-3,17-dione,[reduced ferred...	1e-06
R09884	reaction	androstenedione:acceptor Delta1-oxidoreductas...	1e-06
R10031	reaction	L-valine,[reduced NADPH---hemoprotein reducta...	0.00243573
R10052	reaction	(2R,3S)-3-isopropylmalate:NAD+ oxidoreductase	1e-06
R10102	reaction	4-methylaminobutanoate:oxygen oxidoreductase ...	0.000734487
R10170	reaction	(2R,3S)-3-isopropylmalate hydro-lyase (2-isop...	1e-06
R10178	reaction	4-aminobutanoate:pyruvate aminotransferase	1e-06
R10180	reaction	L-tryptophan:pyruvate aminotransferase	0.0146108
R10261	reaction	1-O-sinapoyl-beta-D-glucose:cyanidin-3-O-beta...	0.0117446
R10291	reaction	UDP-alpha-D-xylose:cyanidin-3-O-beta-D-glucos...	0.0449521
R10507	reaction	L-proline:(acceptor) oxidoreductase	1e-06
R10661	reaction	L-Tryptophan + L-Proline + 2 ATP <=> Breviana...	0.0225988
R10668	reaction	6-amino-6-deoxyfutalosine ribohydrolase	0.0240095
R10843	reaction	zeaxanthin:oxygen oxidoreductase (7,8-cleavin...	0.000120602
R10844	reaction	beta-citraurin:oxygen oxidoreductase (7,8-cle...	0.000919046
R11210	reaction	(-)-yatein,2-oxoglutarate:oxygen oxidoreducta...	1e-06
R11917	reaction	L-tyrosine carboxy-lyase (oxidative-deaminati...	0.016323
R12127	reaction	Deoxypodophyllotoxin <=> Podophyllotoxin	1e-06
R12136	reaction	(3S)-3-Hydroxycyclocitral <=> Picrocrocin	1e-06
R12137	reaction	Picrocrocin <=> Safranal	1e-06
R12215	reaction	5-aminopentanal:NAD+ 1-oxidoreductase	1e-06
R12278	reaction	naringenin,[reduced NADPH---hemoprotein reduc...	0.0308193
R12352	reaction	N3-Fumaroyl-L-2,3-diaminopropanoate + L-Gluta...	0.0456461
C00014	compound	Ammonia	0.0267971
C00025	compound	L-Glutamate	1e-06
C00026	compound	2-Oxoglutarate	0.00249525
C00041	compound	L-Alanine	1e-06
C00047	compound	L-Lysine	1e-06
C00064	compound	L-Glutamine	1e-06
C00082	compound	L-Tyrosine	1e-06
C00109	compound	2-Oxobutanoate	0.0362103
C00121	compound	D-Ribose	0.00110371
C00147	compound	Adenine	1e-06
C00148	compound	L-Proline	1e-06
C00183	compound	L-Valine	1e-06
C00217	compound	D-Glutamate	0.0129279
C00232	compound	Succinate semialdehyde	0.00143093
C00263	compound	L-Homoserine	1e-06
C00334	compound	4-Aminobutanoate	1e-06
C00413	compound	Streptomycin	1e-06
C00431	compound	5-Aminopentanoate	1e-06
C00509	compound	Naringenin	0.00606719
C00546	compound	Methylglyoxal	0.0150844
C00755	compound	4-Hydroxy-3-methoxy-benzaldehyde	1e-06
C00763	compound	D-Proline	1e-06
C00819	compound	D-Glutamine	1e-06
C01138	compound	Streptomycin 6-phosphate	0.000139925
C01401	compound	Alanine	1e-06
C01598	compound	Melatonin	1e-06
C02029	compound	Dihydrozeatin	1e-06
C02378	compound	6-Aminohexanoate	1e-06
C02504	compound	alpha-Isopropylmalate	0.0292447
C02666	compound	Coniferyl aldehyde	1e-06
C03451	compound	(R)-S-Lactoylglutathione	1e-06
C03564	compound	1-Pyrroline-2-carboxylate	0.0175571
C04411	compound	(2R,3S)-3-Isopropylmalate	1e-06
C04608	compound	Apigenin 7-O-beta-D-glucoside	1e-06
C05714	compound	alpha-Aminopropiononitrile	0.0416953
C05791	compound	D-Urobilinogen	0.00139881
C05795	compound	D-Urobilin	1e-06
C06102	compound	Adipate semialdehyde	0.011006
C06593	compound	epsilon-Caprolactam	0.00308071
C06661	compound	Clavulanate-9-aldehyde	0.00430019
C06662	compound	Clavulanic acid	1e-06
C07303	compound	4-Hydroxy-3-methoxyphenyl-beta-hydroxypropano...	0.0104239
C08604	compound	Chrysanthemin	1e-06
C09833	compound	Sakuranetin	1e-06
C10556	compound	Deoxypodophyllotoxin	1e-06
C10874	compound	Podophyllotoxin	1e-06
C12141	compound	Peonidin 3-O-glucoside	1e-06
C15545	compound	cis-Zeatin	1e-06
C15546	compound	O-beta-D-Glucopyranosyl-cis-zeatin	0.0354807
C16449	compound	cis-Zeatin riboside	0.0435323
C16666	compound	Vanillylamine	0.0283668
C17055	compound	Picrocrocin	1e-06
C17062	compound	Safranal	2.84846e-06
C19731	compound	(3S)-3-Hydroxycyclocitral	1e-06
C20144	compound	Androsta-1,4-diene-3,17-dione	1e-06
