# Supplementary material for: Comparative Transcriptomics and Metabolomics Analyses of Avicennia marina and Kandelia obovata under Chilling Stress during Seedling Stage
Source: Int J Mol Sci. 2023 Nov 30;24(23):16989. doi: 10.3390/ijms242316989 (PMC10707264; doi:10.3390/ijms242316989)
Supplement: Supplementary file 1 [file ijms-24-16989-s001.zip › Table S10.xlsx]

## Sheet: K.obovata
Pathway
Aminoacyl-tRNA biosynthesis
Nicotinate and nicotinamide metabolism
Tyrosine metabolism
Arginine and proline metabolism
Isoquinoline alkaloid biosynthesis
Valine, leucine and isoleucine biosynthesis
Galactose metabolism
Lysine biosynthesis
Starch and sucrose metabolism
Cyanoamino acid metabolism
beta-Alanine metabolism
Pentose and glucuronate interconversions
Valine, leucine and isoleucine degradation
Glycerolipid metabolism
Sphingolipid metabolism
Ascorbate and aldarate metabolism
Histidine metabolism
Amino sugar and nucleotide sugar metabolism
Zeatin biosynthesis
Phenylpropanoid biosynthesis
Phenylalanine, tyrosine and tryptophan biosynthesis
Pyruvate metabolism
Carbon fixation in photosynthetic organisms
Alanine, aspartate and glutamate metabolism
Ubiquinone and other terpenoid-quinone biosynthesis
Glycerophospholipid metabolism
Glucosinolate biosynthesis
Glycine, serine and threonine metabolism
Purine metabolism
Cysteine and methionine metabolism
Flavonoid biosynthesis

## Sheet: A.marina
Pathway
Aminoacyl-tRNA biosynthesis
Lysine biosynthesis
Nitrogen metabolism
Arginine and proline metabolism
Zeatin biosynthesis
Alanine, aspartate and glutamate metabolism
Isoquinoline alkaloid biosynthesis
Valine, leucine and isoleucine biosynthesis
Pantothenate and CoA biosynthesis
Lysine degradation
Butanoate metabolism
Tyrosine metabolism
Phenylalanine, tyrosine and tryptophan biosynthesis
Pyruvate metabolism
Ubiquinone and other terpenoid-quinone biosynthesis
Purine metabolism
Glutathione metabolism
Porphyrin and chlorophyll metabolism
Glycine, serine and threonine metabolism
Cysteine and methionine metabolism
Valine, leucine and isoleucine degradation
Pyrimidine metabolism
Phenylpropanoid biosynthesis
Glucosinolate biosynthesis
