# Supplementary material for: Comparative Transcriptomics and Metabolomics Analyses of Avicennia marina and Kandelia obovata under Chilling Stress during Seedling Stage
Source: Int J Mol Sci. 2023 Nov 30;24(23):16989. doi: 10.3390/ijms242316989 (PMC10707264; doi:10.3390/ijms242316989)
Supplement: Supplementary file 1 [file ijms-24-16989-s001.zip › Table S11.xlsx]

## Sheet: K.obovata
PathwayEntry	PathwayDefinition	pvalue	Gene_ID	KOEntry	EC	log2FC	regulation	Name	Annotation	Ko_CS_1_TPM	Ko_CS_2_TPM	Ko_CS_3_TPM	Ko_CS_4_TPM	Ko_CS_5_TPM	Ko_CS_6_TPM	Ko_CK_1_TPM	Ko_CK_2_TPM	Ko_CK_3_TPM	Ko_CK_4_TPM	Ko_CK_5_TPM	Ko_CK_6_TPM	Ko_CS_mean_TPM	Ko_CK_mean_TPM
map00940	Phenylpropanoid biosynthesis	3.17946e-06	TRINITY_DN50084_c0_g1	K06892	EC:1.14.11.-	-1.56935	down	tropC	2-oxoglutarate-Fe(II) type oxidoreductase hxnY isoform X2 [Populus trichocarpa]	1.53	1.48	3.8	3.74	1.73	1.55	13.03	8.4	7.35	6.5	14.94	5.94	2.31	9.36
map00940	Phenylpropanoid biosynthesis	3.17946e-06	TRINITY_DN43189_c1_g2	K09753	EC:1.2.1.44	1.96494	up	TKPR1	Flavonol reductase/cinnamoyl-CoA reductase [Handroanthus impetiginosus]	0.96	0.39	1.19	1.24	0.84	1.06	0.22	0.28	0.16	0.1	0.4	0.81	0.95	0.33
map00940	Phenylpropanoid biosynthesis	3.17946e-06	TRINITY_DN45728_c0_g1	K09753	EC:1.2.1.44	-1.3539	down	TKPR1	cinnamoyl-CoA reductase 1-like isoform X1 [Hevea brasiliensis]	16.31	12.93	8.53	5.96	16.13	14.79	31.64	35.67	41.54	43.66	46.27	51.65	12.44	41.74
map00940	Phenylpropanoid biosynthesis	3.17946e-06	TRINITY_DN46391_c1_g5	K09753	EC:1.2.1.44	1.18525	up	TKPR1	tetraketide alpha-pyrone reductase 1-like [Sesamum indicum]	0.36	0.56	0.85	0.69	0.88	0.78	0.36	0.1	0.38	0.13	0.3	1.14	0.69	0.4
map00940	Phenylpropanoid biosynthesis	3.17946e-06	TRINITY_DN49957_c0_g1	K09753	EC:1.2.1.44	-3.59993	down	TKPR1	cinnamoyl-CoA reductase 1 [Jatropha curcas]	2.59	5.12	1.58	2.55	4.48	3.51	49.56	56.08	47.55	47.3	57.83	49.96	3.3	51.38
map00360	Phenylalanine metabolism	0.0530213	TRINITY_DN50930_c0_g1	K00815	EC:2.6.1.5	3.45402	up	TAT	PREDICTED: tyrosine aminotransferase-like [Populus euphratica]	460.57	229.14	509.28	333.96	176.9	352.79	47.08	43.35	82.44	43.47	85.93	60.81	343.77	60.51
map00941	Flavonoid biosynthesis	0.0108484	TRINITY_DN46186_c1_g2	K05278	EC:1.14.20.6	-3.61733	down	SRG1	codeine O-demethylase-like [Hevea brasiliensis]	10.51	14.84	13.06	10.47	9.06	11	182.78	198.54	178.21	146.25	189.63	191.86	11.49	181.21
map00941	Flavonoid biosynthesis	0.0108484	TRINITY_DN51420_c0_g1	K13065	EC:2.3.1.133	3.32097	up	SHT	spermidine hydroxycinnamoyl transferase [Abrus precatorius]	0.04	0.81	3.85	3.2	6.98	3.3	0.32	0.08	0.42	0.52	0.15	0.79	3.03	0.38
map00940	Phenylpropanoid biosynthesis	3.17946e-06	TRINITY_DN51420_c0_g1	K13065	EC:2.3.1.133	3.32097	up	SHT	spermidine hydroxycinnamoyl transferase [Abrus precatorius]	0.04	0.81	3.85	3.2	6.98	3.3	0.32	0.08	0.42	0.52	0.15	0.79	3.03	0.38
map00941	Flavonoid biosynthesis	0.0108484	TRINITY_DN41572_c0_g2	K13065	EC:2.3.1.133	3.94269	up	SALAT	BAHD acyltransferase At5g47980 [Populus trichocarpa]	125.85	66.09	159.65	102.04	69.61	82.57	4.32	8.79	10.38	9.04	7.42	12.4	100.97	8.72
map00941	Flavonoid biosynthesis	0.0108484	TRINITY_DN41734_c0_g1	K13065	EC:2.3.1.133	2.23973	up	SALAT	PREDICTED: vinorine synthase [Theobroma cacao]	21.68	5.18	9.33	2.93	11.95	6.47	1.76	2.07	4.08	1.57	1.9	4.64	9.59	2.67
map00941	Flavonoid biosynthesis	0.0108484	TRINITY_DN44869_c0_g7	K13065	EC:2.3.1.133	2.27235	up	SALAT	vinorine synthase-like [Manihot esculenta]	39.05	11.23	16.97	7.31	23.44	11.85	2.85	2.9	8.4	4.23	2.8	8.77	18.31	4.99
map00940	Phenylpropanoid biosynthesis	3.17946e-06	TRINITY_DN41572_c0_g2	K13065	EC:2.3.1.133	3.94269	up	SALAT	BAHD acyltransferase At5g47980 [Populus trichocarpa]	125.85	66.09	159.65	102.04	69.61	82.57	4.32	8.79	10.38	9.04	7.42	12.4	100.97	8.72
map00940	Phenylpropanoid biosynthesis	3.17946e-06	TRINITY_DN41734_c0_g1	K13065	EC:2.3.1.133	2.23973	up	SALAT	PREDICTED: vinorine synthase [Theobroma cacao]	21.68	5.18	9.33	2.93	11.95	6.47	1.76	2.07	4.08	1.57	1.9	4.64	9.59	2.67
map00940	Phenylpropanoid biosynthesis	3.17946e-06	TRINITY_DN44869_c0_g7	K13065	EC:2.3.1.133	2.27235	up	SALAT	vinorine synthase-like [Manihot esculenta]	39.05	11.23	16.97	7.31	23.44	11.85	2.85	2.9	8.4	4.23	2.8	8.77	18.31	4.99
map00940	Phenylpropanoid biosynthesis	3.17946e-06	TRINITY_DN50395_c0_g1	K00430	EC:1.11.1.7	3.79096	up	pod	peroxidase 15 [Jatropha curcas]	151.43	141.26	90.34	112.06	167.09	155.08	4.11	7.91	15.81	10.74	20.37	16.68	136.21	12.6
map00940	Phenylpropanoid biosynthesis	3.17946e-06	TRINITY_DN41598_c1_g1	K00430	EC:1.11.1.7	4.6953	up	PNC2	cationic peroxidase 2-like [Durio zibethinus]	0.9	0.47	9.92	3.22	11.14	5.04	0	0	0.45	0	0.91	0	5.11	0.23
map00940	Phenylpropanoid biosynthesis	3.17946e-06	TRINITY_DN53618_c4_g1	K00430	EC:1.11.1.7	1.73119	up	PNC2	peroxidase N1 [Populus trichocarpa]	6.8	2.98	32.67	7.76	17.24	8.76	3.19	2.05	3.82	8.83	4.29	6.37	12.7	4.76
map00940	Phenylpropanoid biosynthesis	3.17946e-06	TRINITY_DN47780_c2_g4	K00430	EC:1.11.1.7	4.28573	up	PER72	PREDICTED: peroxidase 72 [Populus euphratica]	62.77	23.39	11.17	7.41	11.41	40.21	0.89	1.77	2.26	1.23	0.98	4.53	26.06	1.94
map00940	Phenylpropanoid biosynthesis	3.17946e-06	TRINITY_DN48934_c1_g8	K00430	EC:1.11.1.7	7.99785	up	PER63	peroxidase 31-like [Hevea brasiliensis]	1.49	0.26	8.82	0.85	1.17	1.19	0	0	0	0.04	0	0	2.3	0.01
map00940	Phenylpropanoid biosynthesis	3.17946e-06	TRINITY_DN41021_c0_g1	K00430	EC:1.11.1.7	5.59223	up	PER55	putative peroxidase [Rosa chinensis]	8.26	5.24	26.39	7.86	12.94	12.8	0	0	0.84	0.2	0.67	0.49	12.25	0.37
map00940	Phenylpropanoid biosynthesis	3.17946e-06	TRINITY_DN43370_c2_g4	K00430	EC:1.11.1.7	4.89907	up	PER52	PREDICTED: peroxidase P7 [Populus euphratica]	630.5	428.81	1532.42	581.28	969.96	585.72	9.2	16.94	35.4	17.56	16.38	63.07	788.12	26.42
map00940	Phenylpropanoid biosynthesis	3.17946e-06	TRINITY_DN49574_c0_g1	K00430	EC:1.11.1.7	4.15959	up	PER52	peroxidase [Populus alba x Populus glandulosa]	11.25	7.35	47.78	10.38	52.69	14.24	0.58	0.04	1.4	0.22	1.09	7.58	23.95	1.82
map00940	Phenylpropanoid biosynthesis	3.17946e-06	TRINITY_DN48027_c1_g6	K00430	EC:1.11.1.7	6.02031	up	PER51	peroxidase 55-like [Hevea brasiliensis]	4.83	5.74	28.18	9.89	9.7	9.75	0.07	0.32	0.22	0.03	0.5	0.24	11.35	0.23
map00940	Phenylpropanoid biosynthesis	3.17946e-06	TRINITY_DN45393_c0_g1	K00430	EC:1.11.1.7	6.29951	up	PER50	peroxidase 51 [Jatropha curcas]	223.26	76.21	351.85	126.82	238.79	210.14	2.1	1.45	3.29	3.23	2.06	6.04	204.51	3.03
map00940	Phenylpropanoid biosynthesis	3.17946e-06	TRINITY_DN49197_c1_g1	K00430	EC:1.11.1.7	3.7228	up	PER48	Peroxidase 57 precursor, putative [Ricinus communis]	5.72	4.69	3.16	8.11	5.13	4.46	0.34	0.61	0.42	0.5	0.61	0.35	5.21	0.47
map00940	Phenylpropanoid biosynthesis	3.17946e-06	TRINITY_DN47726_c2_g1	K00430	EC:1.11.1.7	-1.83463	down	PER31	peroxidase 31-like [Hevea brasiliensis]	3	2.76	4.04	1.57	7.61	3.43	3.99	4.81	23.36	23.54	30.23	26.61	3.73	18.76
map00940	Phenylpropanoid biosynthesis	3.17946e-06	TRINITY_DN38453_c0_g1	K00430	EC:1.11.1.7	4.94984	up	PER21	peroxidase 21 [Ricinus communis]	1.47	0.32	7.53	0.83	2.96	0.6	0.04	0	0.1	0.2	0	0.24	2.28	0.1
map00940	Phenylpropanoid biosynthesis	3.17946e-06	TRINITY_DN43162_c2_g1	K00430	EC:1.11.1.7	1.77777	up	PER17	peroxidase 17-like [Hevea brasiliensis]	1.6	2.71	7.96	7.7	6.81	2.71	1.55	0.85	1.41	3.54	4.52	0.69	4.92	2.09
map00940	Phenylpropanoid biosynthesis	3.17946e-06	TRINITY_DN44953_c2_g8	K00430	EC:1.11.1.7	3.08954	up	PER12	peroxidase 12 [Ricinus communis]	144.67	85.2	144.31	63.59	89.29	155.57	8.4	8.85	30.32	9.03	20.45	33.68	113.77	18.45
map00940	Phenylpropanoid biosynthesis	3.17946e-06	TRINITY_DN44953_c2_g9	K00430	EC:1.11.1.7	-1.97995	down	PER12	peroxidase 12 [Populus trichocarpa]	0.69	0.28	0.56	0	0.74	0.55	2.71	4.52	1.03	4.08	0.57	2.12	0.47	2.51
map00940	Phenylpropanoid biosynthesis	3.17946e-06	TRINITY_DN52935_c0_g1	K00430	EC:1.11.1.7	6.79709	up	PER12	peroxidase 12-like [Coffea arabica]	30.28	24.17	67.16	37.13	28.14	77.9	2.26	0	0	0	0	0	44.13	0.38
map00940	Phenylpropanoid biosynthesis	3.17946e-06	TRINITY_DN52935_c4_g4	K00430	EC:1.11.1.7	3.28837	up	PER12	peroxidase 12-like [Hevea brasiliensis]	370.7	207.31	338.16	153.83	217.87	334.45	11.58	18.83	63.87	22.59	40.89	64.56	270.39	37.05
map00940	Phenylpropanoid biosynthesis	3.17946e-06	TRINITY_DN53903_c1_g1	K00430	EC:1.11.1.7	6.83313	up	PER12	PREDICTED: peroxidase 12-like [Populus euphratica]	705.2	629.26	1220.01	991.44	546.13	763.57	5.72	6.05	4.75	19.76	7.65	10.1	809.27	9.01
map00940	Phenylpropanoid biosynthesis	3.17946e-06	TRINITY_DN54420_c0_g1	K00430	EC:1.11.1.7	7.97758	up	PER12	peroxidase 12 [Jatropha curcas]	462.77	391.44	845.78	681.9	342.73	433.47	3.54	3.48	2.65	4.75	0.83	1.61	526.35	2.81
map00940	Phenylpropanoid biosynthesis	3.17946e-06	TRINITY_DN44314_c0_g1	K00430	EC:1.11.1.7	2.24534	up	PER11	peroxidase 11-like [Manihot esculenta]	0.46	0.39	2.97	0.66	0.43	0.72	0.04	0.46	0.15	0.18	0.11	0.66	0.94	0.27
map00940	Phenylpropanoid biosynthesis	3.17946e-06	TRINITY_DN56869_c2_g15	K00430	EC:1.11.1.7	6.91454	up	PER10	peroxidase 10 [Populus trichocarpa]	4.08	4.06	5.22	4.08	4.27	4.09	0	0.16	0	0	0	0	4.3	0.03
map00360	Phenylalanine metabolism	0.0530213	TRINITY_DN53497_c0_g2	K10775	EC:4.3.1.24	1.1536	up	PAL6	phenylalanine ammonia-lyase G4 [Ricinus communis]	7.7	4.22	15.81	8.42	10.49	11.71	9.89	10.56	3.94	6.29	1.59	3.5	9.72	5.96
map00940	Phenylpropanoid biosynthesis	3.17946e-06	TRINITY_DN53497_c0_g2	K10775	EC:4.3.1.24	1.1536	up	PAL6	phenylalanine ammonia-lyase G4 [Ricinus communis]	7.7	4.22	15.81	8.42	10.49	11.71	9.89	10.56	3.94	6.29	1.59	3.5	9.72	5.96
map00360	Phenylalanine metabolism	0.0530213	TRINITY_DN37034_c1_g2	K10775	EC:4.3.1.24	1.78036	up	PAL	phenylalanine ammonia-lyase, partial [Rhizophora mangle]	0.5	1.57	1.24	0.95	0.89	0.7	0	0.38	0.19	0.12	1.04	0.85	0.97	0.43
map00360	Phenylalanine metabolism	0.0530213	TRINITY_DN55950_c0_g1	K10775	EC:4.3.1.24	5.14863	up	PAL	phenylalanine ammonia-lyase 2 [Rhizophora mangle]	364.17	92.6	1259.65	224.52	164.96	417.83	9.52	13.4	12.25	12.31	36.23	16.96	420.62	16.78
map00940	Phenylpropanoid biosynthesis	3.17946e-06	TRINITY_DN37034_c1_g2	K10775	EC:4.3.1.24	1.78036	up	PAL	phenylalanine ammonia-lyase, partial [Rhizophora mangle]	0.5	1.57	1.24	0.95	0.89	0.7	0	0.38	0.19	0.12	1.04	0.85	0.97	0.43
map00940	Phenylpropanoid biosynthesis	3.17946e-06	TRINITY_DN55950_c0_g1	K10775	EC:4.3.1.24	5.14863	up	PAL	phenylalanine ammonia-lyase 2 [Rhizophora mangle]	364.17	92.6	1259.65	224.52	164.96	417.83	9.52	13.4	12.25	12.31	36.23	16.96	420.62	16.78
map00940	Phenylpropanoid biosynthesis	3.17946e-06	TRINITY_DN53065_c1_g1	K13066	EC:2.1.1.68	8.401	up	OMT1	caffeic acid 3-O-methyltransferase-like [Hevea brasiliensis]	313.33	192.53	1021.08	212.95	150.33	578.72	2.51	1.12	0.68	2.12	1.56	1.21	411.49	1.53
map00360	Phenylalanine metabolism	0.0530213	TRINITY_DN32298_c0_g1	K00815	EC:2.6.1.5	1.46248	up	naat-A	hypothetical protein MIMGU_mgv1a006516mg [Erythranthe guttata]	0.23	0.36	0.58	0.44	0.39	0.27	0.12	0.18	0.03	0.06	0.17	0.51	0.38	0.18
map00360	Phenylalanine metabolism	0.0530213	TRINITY_DN48799_c1_g1	K00276	EC:1.4.3.21	-1.80121	down	maoI	uncharacterized protein LOC110658877 isoform X1 [Hevea brasiliensis]	0.91	1.34	4.1	1.75	2.93	1.72	3.91	4	9.83	24.27	4.21	13.17	2.12	9.9
map00360	Phenylalanine metabolism	0.0530213	TRINITY_DN54038_c1_g2	K00276	EC:1.4.3.21	4.59995	up	maoI	uncharacterized protein LOC110628926 isoform X1 [Manihot esculenta]	26.43	40.57	44.65	38.7	34.98	30.66	0.96	0.97	1.73	2.63	2.82	2.33	36	1.91
map00940	Phenylpropanoid biosynthesis	3.17946e-06	TRINITY_DN55311_c3_g2	K01188	EC:3.2.1.21	2.50131	up	LI	PREDICTED: beta-glucosidase 12-like [Pyrus x bretschneideri]	162.96	5.25	37.16	1.38	66.95	74.91	17.06	16.78	32.23	0.78	8.06	4.36	58.1	13.21
map00941	Flavonoid biosynthesis	0.0108484	TRINITY_DN46844_c0_g3	K13081	EC:1.17.1.3	-1.52255	down	LAR	leucoanthocyanidin reductase-like [Durio zibethinus]	34.19	32.52	22.34	15.6	29.93	32.41	84.61	72.11	73.16	94.61	183.73	97.41	27.83	100.94
map00941	Flavonoid biosynthesis	0.0108484	TRINITY_DN49851_c1_g1	K13081	EC:1.17.1.3	1.7854	up	LAR	leucoanthocyanidin reductase-like [Hevea brasiliensis]	12.74	7.71	8.51	3.72	16.41	14.63	0.44	2.55	3.4	2.92	6.3	8.29	10.62	3.98
map00940	Phenylpropanoid biosynthesis	3.17946e-06	TRINITY_DN46232_c0_g1	K06892	EC:1.14.11.-	4.51089	up	IQM4	IQ domain-containing protein IQM1-like isoform X1 [Hevea brasiliensis]	79.45	16.54	107.91	25.04	44.17	57.66	0.7	0.32	2.9	3.04	2.79	10.69	55.13	3.41
map00940	Phenylpropanoid biosynthesis	3.17946e-06	TRINITY_DN46232_c0_g2	K06892	EC:1.14.11.-	4.91312	up	IQM4	IQ domain-containing protein IQM1-like [Manihot esculenta]	57.3	15.7	86.79	21.93	35.87	44.29	0.33	0.24	2.03	1.23	2.36	5.8	43.65	2
map00940	Phenylpropanoid biosynthesis	3.17946e-06	TRINITY_DN47537_c2_g1	K06892	EC:1.14.11.-	1.42518	up	IQM3	IQ domain-containing protein IQM3-like [Hevea brasiliensis]	18.31	11.04	19.02	12.76	11.42	11.26	4.61	6.05	6.68	8.1	4.99	10.86	13.97	6.88
map00941	Flavonoid biosynthesis	0.0108484	TRINITY_DN15327_c0_g1	K13065	EC:2.3.1.133	-4.54874	down	HST	shikimate O-hydroxycinnamoyltransferase [Populus trichocarpa]	0	0	0.06	0	0.12	0.07	0.96	1.9	0.73	6.46	0.68	1.38	0.04	2.02
map00941	Flavonoid biosynthesis	0.0108484	TRINITY_DN46117_c0_g1	K13065	EC:2.3.1.133	-2.58876	down	HST	hydroxycinnamoyl-CoA:quinate hydroxycinnamoyltransferase [Erythroxylum coca]	9	19.53	9.3	13.38	14.71	13.48	32.06	38.58	126.72	67.86	186.82	144.62	13.23	99.44
map00941	Flavonoid biosynthesis	0.0108484	TRINITY_DN46126_c0_g3	K13065	EC:2.3.1.133	5.03687	up	HST	shikimate O-hydroxycinnamoyltransferase-like [Hevea brasiliensis]	82.34	46.4	410.82	162.29	122.75	150.18	8	7.99	7.41	6.36	3.6	8.2	162.46	6.93
map00940	Phenylpropanoid biosynthesis	3.17946e-06	TRINITY_DN15327_c0_g1	K13065	EC:2.3.1.133	-4.54874	down	HST	shikimate O-hydroxycinnamoyltransferase [Populus trichocarpa]	0	0	0.06	0	0.12	0.07	0.96	1.9	0.73	6.46	0.68	1.38	0.04	2.02
map00940	Phenylpropanoid biosynthesis	3.17946e-06	TRINITY_DN46117_c0_g1	K13065	EC:2.3.1.133	-2.58876	down	HST	hydroxycinnamoyl-CoA:quinate hydroxycinnamoyltransferase [Erythroxylum coca]	9	19.53	9.3	13.38	14.71	13.48	32.06	38.58	126.72	67.86	186.82	144.62	13.23	99.44
map00940	Phenylpropanoid biosynthesis	3.17946e-06	TRINITY_DN46126_c0_g3	K13065	EC:2.3.1.133	5.03687	up	HST	shikimate O-hydroxycinnamoyltransferase-like [Hevea brasiliensis]	82.34	46.4	410.82	162.29	122.75	150.18	8	7.99	7.41	6.36	3.6	8.2	162.46	6.93
map00940	Phenylpropanoid biosynthesis	3.17946e-06	TRINITY_DN50395_c0_g3	K00430	EC:1.11.1.7	4.8843	up	HRPA2	peroxidase A2 [Populus trichocarpa]	4.67	2.92	4.14	3.29	3.33	4.62	0	0	0.39	0.09	0.1	0.38	3.83	0.16
map00360	Phenylalanine metabolism	0.0530213	TRINITY_DN50064_c0_g1	K00817	EC:2.6.1.9	-1.05749	down	HPA	histidinol-phosphate aminotransferase, chloroplastic isoform X2 [Jatropha curcas]	10.65	15.37	7.93	7.87	11.48	8.76	23.41	23.75	24.86	25.64	22.08	24.47	10.34	24.03
map00941	Flavonoid biosynthesis	0.0108484	TRINITY_DN40099_c1_g3	K13065	EC:2.3.1.133	-2.17762	down	HCT4	protein ECERIFERUM 26-like [Populus trichocarpa]	3.04	0.77	1.72	0.21	1.65	2.31	12.44	16.47	5.93	11.1	3.87	7.42	1.62	9.54
map00940	Phenylpropanoid biosynthesis	3.17946e-06	TRINITY_DN40099_c1_g3	K13065	EC:2.3.1.133	-2.17762	down	HCT4	protein ECERIFERUM 26-like [Populus trichocarpa]	3.04	0.77	1.72	0.21	1.65	2.31	12.44	16.47	5.93	11.1	3.87	7.42	1.62	9.54
map00360	Phenylalanine metabolism	0.0530213	TRINITY_DN47748_c0_g1	K00074	EC:1.1.1.157	-1.21053	down	hbdA	uncharacterized protein LOC18095567 [Populus trichocarpa]	11.62	13.65	9.6	8.18	11.51	12.73	32.56	29.81	35.15	34.16	37.22	28.23	11.21	32.85
map00940	Phenylpropanoid biosynthesis	3.17946e-06	TRINITY_DN37898_c0_g1	K00430	EC:1.11.1.7	7.82719	up	GSVIVT00037159001	peroxidase 5 [Jatropha curcas]	13.7	1.34	7.92	12.62	4.47	25.51	0.08	0	0	0.12	0.04	0	10.93	0.04
map00940	Phenylpropanoid biosynthesis	3.17946e-06	TRINITY_DN47849_c0_g1	K00430	EC:1.11.1.7	-1.87513	down	GSVIVT00037159001	hypothetical protein JCGZ_06082 [Jatropha curcas]	2.34	0.55	5.04	0.71	2.8	1.01	0.13	0.17	14.26	3.47	24.74	19.67	2.08	10.41
map00940	Phenylpropanoid biosynthesis	3.17946e-06	TRINITY_DN48987_c0_g1	K00430	EC:1.11.1.7	1.8535	up	GSVIVT00023967001	peroxidase 4 [Jatropha curcas]	58.26	16.1	50.13	22.85	142.66	87.07	8.98	17.41	15.96	46.61	19.53	31.76	62.84	23.38
map00940	Phenylpropanoid biosynthesis	3.17946e-06	TRINITY_DN53081_c0_g3	K00430	EC:1.11.1.7	1.96382	up	GSVIVT00023967001	peroxidase 4-like [Sesamum indicum]	1.41	0.79	2.11	3.43	1.83	2.02	0	1.79	0.22	0.25	0.86	0.94	1.93	0.68
map00940	Phenylpropanoid biosynthesis	3.17946e-06	TRINITY_DN53996_c1_g1	K05349	EC:3.2.1.21	-1.80904	down	gluA	uncharacterized protein LOC8276364 [Ricinus communis]	1.28	2.37	0.84	1.09	1.96	1.92	10.32	10.73	10.85	11.51	9.32	8.12	1.58	10.14
map00941	Flavonoid biosynthesis	0.0108484	TRINITY_DN42309_c1_g1	K05278	EC:1.14.20.6	3.02533	up	FLS	flavonol synthase/flavanone 3-hydroxylase [Citrus sinensis]	3.68	11.24	4.42	8.83	13.82	16.51	1.39	1.95	1.16	1.94	1.54	1.31	9.75	1.55
map00941	Flavonoid biosynthesis	0.0108484	TRINITY_DN42309_c1_g3	K05278	EC:1.14.20.6	1.60435	up	FLS	PREDICTED: flavonol synthase/flavanone 3-hydroxylase [Nelumbo nucifera]	1.53	2.41	0.93	0.62	7.37	4.6	0	0.33	0.99	0.77	0.48	1.8	2.91	0.73
map00941	Flavonoid biosynthesis	0.0108484	TRINITY_DN42309_c1_g5	K05278	EC:1.14.20.6	3.7048	up	FLS	flavonol synthase/flavanone 3-hydroxylase [Ziziphus jujuba]	0.95	2.4	0.93	2.34	2.61	3.08	0.16	0.4	0.12	0.08	0.23	0.19	2.05	0.2
map00941	Flavonoid biosynthesis	0.0108484	TRINITY_DN52116_c1_g1	K13082	EC:1.1.1.219 1.1.1.234	-3.25531	down	F	putative anthocyanidin reductase [Populus trichocarpa]	4.8	9.65	5.57	5.47	8.72	6.43	111.31	115.34	74.03	87.81	50.23	78.21	6.77	86.16
map00360	Phenylalanine metabolism	0.0530213	TRINITY_DN55549_c1_g1	K01593	EC:4.1.1.28 4.1.1.105	4.31261	up	ELI5	tyrosine decarboxylase 1 isoform X1 [Ricinus communis]	82.46	100.33	102.11	105.93	127.13	109.9	6.32	10.11	12.3	10.11	9.62	10.45	104.64	9.82
map00941	Flavonoid biosynthesis	0.0108484	TRINITY_DN47408_c1_g1	K05278	EC:1.14.20.6	-4.07854	down	DLO2	protein DMR6-LIKE OXYGENASE 2 [Jatropha curcas]	151.3	186.44	205.68	178.22	189.13	177.44	4427.04	4775.86	3396.87	4750.51	2671.98	3603.15	181.37	3937.57
map00941	Flavonoid biosynthesis	0.0108484	TRINITY_DN3584_c0_g1	K05278	EC:1.14.20.6	2.41789	up	DLO1	protein DMR6-LIKE OXYGENASE 1-like [Hevea brasiliensis]	19.97	0.59	3.28	0	0.72	5.82	0.15	2.54	0.9	0.09	0.85	3.03	5.06	1.26
map00941	Flavonoid biosynthesis	0.0108484	TRINITY_DN46558_c0_g1	K00475	EC:1.14.11.9	-3.33004	down	DLO1	protein DMR6-LIKE OXYGENASE 2-like [Rosa chinensis]	4.31	3.11	15.24	4.74	2.55	4.82	2.03	10.2	130.37	11.49	113.48	175.14	5.79	73.78
map00941	Flavonoid biosynthesis	0.0108484	TRINITY_DN54931_c3_g2	K05278	EC:1.14.20.6	1.14443	up	DIOX2	protein SRG1 [Populus trichocarpa]	62.23	62.02	48.35	43.61	50.56	37.51	22.47	20.84	57.81	30.76	45.31	53.01	50.71	38.37
map00941	Flavonoid biosynthesis	0.0108484	TRINITY_DN48164_c1_g4	K13082	EC:1.1.1.219 1.1.1.234	-2.12718	down	DFR	PREDICTED: vestitone reductase-like isoform X1 [Populus euphratica]	22.87	26.85	25.33	16.23	20.92	27.52	163.9	155.52	117.69	145.32	93.77	122	23.29	133.03
map00941	Flavonoid biosynthesis	0.0108484	TRINITY_DN52374_c1_g1	K09754	EC:1.14.13.36	3.45524	up	CYP98A2	hypothetical protein CDL15_Pgr001222 [Punica granatum]	88.27	106.61	92.98	123.65	100.4	128.86	11.51	13.17	12.92	11.59	13.21	13	106.8	12.57
map00941	Flavonoid biosynthesis	0.0108484	TRINITY_DN55386_c1_g1	K09754	EC:1.14.13.36	1.41352	up	CYP98A2	hypothetical protein JCGZ_10726 [Jatropha curcas]	11.06	26.59	4.84	12.01	8.95	14.23	3.11	4.11	5.66	6.81	6.68	7.75	12.95	5.69
map00941	Flavonoid biosynthesis	0.0108484	TRINITY_DN55386_c1_g5	K09754	EC:1.14.13.36	1.27847	up	CYP98A2	p-coumaryl-CoA 3'-hydroxylase [Populus alba x Populus grandidentata]	58.84	82.6	48.18	74.84	45.51	63.13	37.32	36.94	39.2	42.23	27.81	37.72	62.18	36.87
map00940	Phenylpropanoid biosynthesis	3.17946e-06	TRINITY_DN52374_c1_g1	K09754	EC:1.14.13.36	3.45524	up	CYP98A2	hypothetical protein CDL15_Pgr001222 [Punica granatum]	88.27	106.61	92.98	123.65	100.4	128.86	11.51	13.17	12.92	11.59	13.21	13	106.8	12.57
map00940	Phenylpropanoid biosynthesis	3.17946e-06	TRINITY_DN55386_c1_g1	K09754	EC:1.14.13.36	1.41352	up	CYP98A2	hypothetical protein JCGZ_10726 [Jatropha curcas]	11.06	26.59	4.84	12.01	8.95	14.23	3.11	4.11	5.66	6.81	6.68	7.75	12.95	5.69
map00940	Phenylpropanoid biosynthesis	3.17946e-06	TRINITY_DN55386_c1_g5	K09754	EC:1.14.13.36	1.27847	up	CYP98A2	p-coumaryl-CoA 3'-hydroxylase [Populus alba x Populus grandidentata]	58.84	82.6	48.18	74.84	45.51	63.13	37.32	36.94	39.2	42.23	27.81	37.72	62.18	36.87
map00940	Phenylpropanoid biosynthesis	3.17946e-06	TRINITY_DN45251_c0_g1	K09755	EC:1.14.-.-	4.11142	up	CYP84A1	cytochrome P450 84A1-like [Hevea brasiliensis]	157.92	78.69	727.5	165.46	152.38	112.4	19.62	19.3	24.31	14.44	11.17	21.93	232.39	18.46
map00940	Phenylpropanoid biosynthesis	3.17946e-06	TRINITY_DN46717_c0_g8	K09755	EC:1.14.-.-	3.96373	up	CYP84A1	LOW QUALITY PROTEIN: cytochrome P450 84A1-like [Herrania umbratica]	101.54	55.45	612.02	113.92	115.49	92.09	21.47	15.96	19.04	15.23	10.33	15.03	181.75	16.18
map00941	Flavonoid biosynthesis	0.0108484	TRINITY_DN43661_c0_g2	K05280	EC:1.14.14.82	2.01413	up	CYP75B2	PREDICTED: flavonoid 3'-monooxygenase [Populus euphratica]	37.5	22.6	13.75	17.83	38.84	59.76	3.38	5.84	9.96	6.73	24.12	11.52	31.71	10.26
map00941	Flavonoid biosynthesis	0.0108484	TRINITY_DN43661_c0_g3	K05280	EC:1.14.14.82	2.54911	up	CYP75B2	flavonoid 3'-monooxygenase [Manihot esculenta]	4.15	0.91	2.97	0.75	1.54	1.69	0.1	0.28	0.67	0.1	0.08	1.27	2	0.42
map00941	Flavonoid biosynthesis	0.0108484	TRINITY_DN46117_c0_g4	K13083	EC:1.14.14.81	3.31054	up	CYP75A1	flavonoid 3',5'-hydroxylase 2-like [Hevea brasiliensis]	117.41	104.35	201.43	100.07	251.47	270.4	0.85	2.66	20.99	51.52	32.26	30.98	174.19	23.21
map00941	Flavonoid biosynthesis	0.0108484	TRINITY_DN53151_c0_g1	K00487	EC:1.14.13.11	2.89785	up	CYP73A16	cytochrome p450 [Croton stellatopilosus]	115.11	85.18	77.66	128.27	73.05	142.64	11.33	23.85	16.55	21.68	24.13	24.09	103.65	20.27
map00360	Phenylalanine metabolism	0.0530213	TRINITY_DN53151_c0_g1	K00487	EC:1.14.13.11	2.89785	up	CYP73A16	cytochrome p450 [Croton stellatopilosus]	115.11	85.18	77.66	128.27	73.05	142.64	11.33	23.85	16.55	21.68	24.13	24.09	103.65	20.27
map00940	Phenylpropanoid biosynthesis	3.17946e-06	TRINITY_DN53151_c0_g1	K00487	EC:1.14.13.11	2.89785	up	CYP73A16	cytochrome p450 [Croton stellatopilosus]	115.11	85.18	77.66	128.27	73.05	142.64	11.33	23.85	16.55	21.68	24.13	24.09	103.65	20.27
map00941	Flavonoid biosynthesis	0.0108484	TRINITY_DN45592_c0_g3	K00487	EC:1.14.13.11	3.07317	up	CYP73A13	trans-cinnamate 4-monooxygenase [Citrus clementina]	113.92	64.29	81.59	108.97	65.21	126.07	5.37	11.8	9.01	12.38	13.79	14	93.34	11.06
map00360	Phenylalanine metabolism	0.0530213	TRINITY_DN45592_c0_g3	K00487	EC:1.14.13.11	3.07317	up	CYP73A13	trans-cinnamate 4-monooxygenase [Citrus clementina]	113.92	64.29	81.59	108.97	65.21	126.07	5.37	11.8	9.01	12.38	13.79	14	93.34	11.06
map00940	Phenylpropanoid biosynthesis	3.17946e-06	TRINITY_DN45592_c0_g3	K00487	EC:1.14.13.11	3.07317	up	CYP73A13	trans-cinnamate 4-monooxygenase [Citrus clementina]	113.92	64.29	81.59	108.97	65.21	126.07	5.37	11.8	9.01	12.38	13.79	14	93.34	11.06
map00940	Phenylpropanoid biosynthesis	3.17946e-06	TRINITY_DN53928_c1_g1	K18368	EC:3.1.1.-	5.16445	up	CSE	caffeoyl shikimate esterase 2 [Populus tomentosa]	156.13	81.28	310.74	188.76	123.04	209.95	4.68	5.71	10.37	5.9	6.54	7.77	178.32	6.83
map00941	Flavonoid biosynthesis	0.0108484	TRINITY_DN49209_c1_g2	K00588	EC:2.1.1.104	-2.89472	down	COMTD1	PREDICTED: probable caffeoyl-CoA O-methyltransferase At4g26220 isoform X2 [Gossypium raimondii]	0.83	0.87	0.53	0.77	1.01	0.29	11.52	7.45	6.09	10.23	5.37	6.93	0.72	7.93
map00360	Phenylalanine metabolism	0.0530213	TRINITY_DN49209_c1_g2	K00588	EC:2.1.1.104	-2.89472	down	COMTD1	PREDICTED: probable caffeoyl-CoA O-methyltransferase At4g26220 isoform X2 [Gossypium raimondii]	0.83	0.87	0.53	0.77	1.01	0.29	11.52	7.45	6.09	10.23	5.37	6.93	0.72	7.93
map00940	Phenylpropanoid biosynthesis	3.17946e-06	TRINITY_DN49209_c1_g2	K00588	EC:2.1.1.104	-2.89472	down	COMTD1	PREDICTED: probable caffeoyl-CoA O-methyltransferase At4g26220 isoform X2 [Gossypium raimondii]	0.83	0.87	0.53	0.77	1.01	0.29	11.52	7.45	6.09	10.23	5.37	6.93	0.72	7.93
map00940	Phenylpropanoid biosynthesis	3.17946e-06	TRINITY_DN49297_c0_g1	K13066	EC:2.1.1.68	-1.61977	down	COMT1	caffeic acid 3-O-methyltransferase [Ricinus communis]	554.55	609.11	761.33	437.92	2356.47	1238.43	2515.81	4026.32	4186.11	4246.63	3582.43	5359.97	992.97	3986.21
map00940	Phenylpropanoid biosynthesis	3.17946e-06	TRINITY_DN55158_c0_g2	K13066	EC:2.1.1.68	4.46493	up	COMT1	caffeic acid 3-O-methyltransferase [Castanea mollissima]	307.08	220.44	268.02	154.62	265.61	372.92	8.35	16.04	18.64	12.5	13.01	20.73	264.78	14.88
map00940	Phenylpropanoid biosynthesis	3.17946e-06	TRINITY_DN55158_c0_g3	K13066	EC:2.1.1.68	3.02221	up	COMT1	caffeic acid O-methyltransferase [Catalpa bungei]	0.39	0.48	0.67	0.76	0.68	0.42	0.12	0.18	0.06	0.11	0.11	0.06	0.57	0.11
map00940	Phenylpropanoid biosynthesis	3.17946e-06	TRINITY_DN41561_c3_g3	K13066	EC:2.1.1.68	-2.06491	down	COMT	quercetin 3-O-methyltransferase 1 isoform X2 [Jatropha curcas]	7.82	7.03	5.9	10.44	8.81	8.23	46.5	60.39	34.3	37.86	38.22	43.54	8.04	43.47
map00940	Phenylpropanoid biosynthesis	3.17946e-06	TRINITY_DN51459_c2_g3	K13066	EC:2.1.1.68	-2.46314	down	COMT	caffeic acid 3-O-methyltransferase [Hevea brasiliensis]	1.92	1.66	1.67	2.66	1.59	2.93	17.75	19.88	13.88	12.68	14.5	12.72	2.07	15.23
map00941	Flavonoid biosynthesis	0.0108484	TRINITY_DN42684_c2_g2	K05278	EC:1.14.20.6	-2.67366	down	CODM	protein SRG1-like isoform X2 [Hevea brasiliensis]	11.57	15.94	11.6	13.78	7.03	11.3	145.81	100.04	84.95	55.55	107.02	78.62	11.87	95.33
map00941	Flavonoid biosynthesis	0.0108484	TRINITY_DN41377_c0_g4	K00660	EC:2.3.1.74	3.74269	up	CHS3	hypothetical protein CCACVL1_10094 [Corchorus capsularis]	0.67	3.88	0.32	1.38	4.8	5.34	0.07	0.07	0.35	0.26	0.35	0.48	2.73	0.26
map00941	Flavonoid biosynthesis	0.0108484	TRINITY_DN54817_c4_g5	K00660	EC:2.3.1.74	-2.96061	down	CHS	chalcone synthase 1 [Ananas comosus]	0.03	0.27	0.61	0.04	1.92	0.7	1.99	3.2	5.34	10.65	0.87	15.5	0.6	6.26
map00941	Flavonoid biosynthesis	0.0108484	TRINITY_DN41990_c1_g1	K13065	EC:2.3.1.133	8.02707	up	CHAT	omega-hydroxypalmitate O-feruloyl transferase [Hevea brasiliensis]	13.46	0.03	20.49	0.61	1.59	20.41	0.07	0	0	0.15	0	0.05	9.43	0.05
map00940	Phenylpropanoid biosynthesis	3.17946e-06	TRINITY_DN41990_c1_g1	K13065	EC:2.3.1.133	8.02707	up	CHAT	omega-hydroxypalmitate O-feruloyl transferase [Hevea brasiliensis]	13.46	0.03	20.49	0.61	1.59	20.41	0.07	0	0	0.15	0	0.05	9.43	0.05
map00940	Phenylpropanoid biosynthesis	3.17946e-06	TRINITY_DN48421_c0_g4	K09753	EC:1.2.1.44	5.81189	up	CCR2	cinnamoyl-CoA reductase 1 [Citrus clementina]	483.84	209.01	1212.08	410.45	423.77	437.04	7.83	11.37	14.74	11.47	11.42	18.35	529.36	12.53
map00940	Phenylpropanoid biosynthesis	3.17946e-06	TRINITY_DN40122_c2_g1	K09753	EC:1.2.1.44	-1.20836	down	CCR1	cinnamoyl-CoA reductase 1 isoform X1 [Populus trichocarpa]	275.24	189.76	285.17	221.62	149.95	162.54	1041.44	700.49	657.56	434.24	535.39	443.79	214.05	635.48
map00940	Phenylpropanoid biosynthesis	3.17946e-06	TRINITY_DN41999_c1_g1	K09753	EC:1.2.1.44	1.57599	up	CCR1	cinnamoyl-CoA reductase-like SNL6 [Quercus suber]	19.32	14.05	11.66	12.94	15.08	14.18	5.38	6.67	7.17	6.51	6.07	5.62	14.54	6.24
map00940	Phenylpropanoid biosynthesis	3.17946e-06	TRINITY_DN48059_c3_g2	K09753	EC:1.2.1.44	5.57563	up	CCR1	cinnamoyl CoA reductase [Populus tomentosa]	420.04	171.08	1003.04	343.13	370.44	395.35	12.56	10.45	15.62	14	11.76	17.42	450.51	13.63
map00940	Phenylpropanoid biosynthesis	3.17946e-06	TRINITY_DN48421_c0_g3	K09753	EC:1.2.1.44	6.02023	up	CCR1	cinnamoyl CoA reductase [Populus tomentosa]	1019.9	451.15	2663.56	890.85	956.86	985.58	16.02	31.5	30.74	14.37	23.37	32.79	1161.32	24.8
map00940	Phenylpropanoid biosynthesis	3.17946e-06	TRINITY_DN48421_c0_g9	K09753	EC:1.2.1.44	1.72627	up	CCR1	cinnamoyl-CoA reductase 1 [Jatropha curcas]	8.35	3.33	14.87	2.73	4.79	3.24	1.43	2.88	3.95	1.54	0.8	4.59	6.22	2.53
map00940	Phenylpropanoid biosynthesis	3.17946e-06	TRINITY_DN48959_c1_g6	K09753	EC:1.2.1.44	2.51885	up	CCR1	cinnamoyl-CoA reductase 1 [Morus notabilis]	13.7	1.9	5.98	2.33	5.01	7.47	0.29	0.35	0.21	5.88	0.7	1.29	6.06	1.45
map00941	Flavonoid biosynthesis	0.0108484	TRINITY_DN45841_c1_g1	K00588	EC:2.1.1.104	6.25168	up	CCOAOMT2	hypothetical protein DVH24_034257 [Malus domestica]	1157.18	569.14	1797.46	1384.72	1262.01	1027.45	14.66	24.9	29.86	17.16	14.92	22.06	1199.66	20.59
map00360	Phenylalanine metabolism	0.0530213	TRINITY_DN45841_c1_g1	K00588	EC:2.1.1.104	6.25168	up	CCOAOMT2	hypothetical protein DVH24_034257 [Malus domestica]	1157.18	569.14	1797.46	1384.72	1262.01	1027.45	14.66	24.9	29.86	17.16	14.92	22.06	1199.66	20.59
map00940	Phenylpropanoid biosynthesis	3.17946e-06	TRINITY_DN45841_c1_g1	K00588	EC:2.1.1.104	6.25168	up	CCOAOMT2	hypothetical protein DVH24_034257 [Malus domestica]	1157.18	569.14	1797.46	1384.72	1262.01	1027.45	14.66	24.9	29.86	17.16	14.92	22.06	1199.66	20.59
map00941	Flavonoid biosynthesis	0.0108484	TRINITY_DN45204_c0_g1	K00588	EC:2.1.1.104	6.08747	up	CCOAOMT1	caffeoyl-CoA O-methyltransferase 5 [Prunus yedoensis var. nudiflora]	579.84	315.84	977.38	670.75	617.19	557.74	9.42	13.37	14.72	10.13	8.95	17.59	619.79	12.36
map00360	Phenylalanine metabolism	0.0530213	TRINITY_DN45204_c0_g1	K00588	EC:2.1.1.104	6.08747	up	CCOAOMT1	caffeoyl-CoA O-methyltransferase 5 [Prunus yedoensis var. nudiflora]	579.84	315.84	977.38	670.75	617.19	557.74	9.42	13.37	14.72	10.13	8.95	17.59	619.79	12.36
map00940	Phenylpropanoid biosynthesis	3.17946e-06	TRINITY_DN45204_c0_g1	K00588	EC:2.1.1.104	6.08747	up	CCOAOMT1	caffeoyl-CoA O-methyltransferase 5 [Prunus yedoensis var. nudiflora]	579.84	315.84	977.38	670.75	617.19	557.74	9.42	13.37	14.72	10.13	8.95	17.59	619.79	12.36
map00940	Phenylpropanoid biosynthesis	3.17946e-06	TRINITY_DN46929_c1_g3	K00083	EC:1.1.1.195	4.0571	up	CAD9	probable cinnamyl alcohol dehydrogenase 9 [Jatropha curcas]	0.05	0	0.55	0	3.46	0.92	0	0	0	0.23	0	0.14	0.83	0.06
map00940	Phenylpropanoid biosynthesis	3.17946e-06	TRINITY_DN39524_c0_g6	K00083	EC:1.1.1.195	1.46541	up	CAD1	probable mannitol dehydrogenase [Sesamum indicum]	0.77	0.82	0.82	0.79	0.85	0.59	0.23	0.23	0.19	0.21	0.41	0.89	0.77	0.36
map00940	Phenylpropanoid biosynthesis	3.17946e-06	TRINITY_DN52469_c0_g1	K00083	EC:1.1.1.195	4.56473	up	CAD1	PREDICTED: cinnamyl alcohol dehydrogenase 1 [Erythranthe guttata]	119.54	181.82	135.65	268.81	195.25	143.72	2.77	8.21	15.63	10	9.19	14.2	174.13	10
map00940	Phenylpropanoid biosynthesis	3.17946e-06	TRINITY_DN43116_c2_g4	K00083	EC:1.1.1.195	1.6196	up	CAD	Alcohol dehydrogenase, class V [Handroanthus impetiginosus]	0.21	0.52	0.73	0.72	0.49	0.66	0.2	0.23	0.08	0.08	0.46	0.35	0.56	0.23
map00941	Flavonoid biosynthesis	0.0108484	TRINITY_DN49293_c0_g6	K01859	EC:5.5.1.6	-1.17598	down	BP80	vacuolar-sorting receptor 3 [Jatropha curcas]	19.9	13.82	11.52	14.06	15.07	6.4	13.68	14.63	56.19	28	49.37	37.09	13.46	33.16
map00941	Flavonoid biosynthesis	0.0108484	TRINITY_DN56863_c2_g1	K01859	EC:5.5.1.6	-1.00949	down	BP80	vacuolar-sorting receptor 1-like isoform X1 [Hevea brasiliensis]	30.85	36.5	30.19	30.88	25.4	21.4	63.65	83.85	108.75	79.24	101.02	93.05	29.2	88.26
map00940	Phenylpropanoid biosynthesis	3.17946e-06	TRINITY_DN47165_c0_g1	K01188	EC:3.2.1.21	-1.3372	down	BGLU5	beta-glucosidase 11-like [Quercus suber]	14.92	21.95	13.76	14.48	41.2	20.43	66.55	75.9	54.39	62.7	71.05	63.75	21.12	65.72
map00940	Phenylpropanoid biosynthesis	3.17946e-06	TRINITY_DN55195_c1_g1	K01188	EC:3.2.1.21	1.98854	up	BGLU5	Beta glucosidase 11, putative [Theobroma cacao]	2.25	10.71	1.05	3.67	10.78	8.47	1.59	2.46	2.69	1.07	2.24	1.96	6.16	2
map00940	Phenylpropanoid biosynthesis	3.17946e-06	TRINITY_DN54566_c1_g1	K05350	EC:3.2.1.21	-1.75148	down	BGLU44	beta-glucosidase 44-like [Hevea brasiliensis]	5.57	2.85	9.39	2.57	14.36	4.71	25.03	27.65	25.34	31.37	15.27	15.28	6.58	23.32
map00940	Phenylpropanoid biosynthesis	3.17946e-06	TRINITY_DN55797_c1_g1	K01188	EC:3.2.1.21	-2.27428	down	BGLU42	beta-glucosidase 42 [Manihot esculenta]	14.35	16.21	12.22	15.29	16.28	12.83	109.59	106.58	88.82	86.07	61.17	80.85	14.53	88.85
map00940	Phenylpropanoid biosynthesis	3.17946e-06	TRINITY_DN43787_c0_g1	K01188	EC:3.2.1.21	-2.11262	down	BGLU4	beta-glucosidase 42 [Manihot esculenta]	27.27	32.97	28.25	30.01	30.21	28.27	210.48	194.84	152.46	180.21	124.64	151.12	29.5	168.96
map00940	Phenylpropanoid biosynthesis	3.17946e-06	TRINITY_DN45660_c0_g1	K01188	EC:3.2.1.21	-4.49121	down	BGLU4	PREDICTED: LOW QUALITY PROTEIN: beta-glucosidase 4-like [Malus domestica]	0.06	0.06	0.04	0.25	0.23	0.1	9.2	6.92	2.17	2.7	1.88	1.06	0.12	3.99
map00940	Phenylpropanoid biosynthesis	3.17946e-06	TRINITY_DN50110_c0_g1	K01188	EC:3.2.1.21	-1.3603	down	BGLU17	beta-glucosidase 17-like [Jatropha curcas]	2.84	3.17	4.12	1.32	2.33	3.2	2.23	4.49	10.34	14.17	8.98	14.92	2.83	9.19
map00940	Phenylpropanoid biosynthesis	3.17946e-06	TRINITY_DN38750_c0_g1	K01188	EC:3.2.1.21	2.34404	up	BGLU12	beta-glucosidase 12-like [Hevea brasiliensis]	79.05	1.11	11.06	0.55	20.45	30.65	5.42	9.08	13.97	1.01	6.44	1.55	23.81	6.25
map00940	Phenylpropanoid biosynthesis	3.17946e-06	TRINITY_DN43014_c2_g3	K01188	EC:3.2.1.21	1.08721	up	BGLU11	Glycoside hydrolase [Parasponia andersonii]	5.94	15.4	1.3	7.15	13.93	9.08	3.75	7.08	5.77	3.6	6.26	5.32	8.8	5.3
map00940	Phenylpropanoid biosynthesis	3.17946e-06	TRINITY_DN55166_c1_g2	K01188	EC:3.2.1.21	-1.22961	down	BGLU11	beta-glucosidase 11 isoform X1 [Ricinus communis]	10.43	10.62	10.79	3.57	18.04	8.14	34.92	39.29	32.13	27.46	23.71	29.71	10.26	31.2
map00940	Phenylpropanoid biosynthesis	3.17946e-06	TRINITY_DN55260_c0_g1	K01188	EC:3.2.1.21	1.18967	up	BGLU11	beta-glucosidase 11-like [Ziziphus jujuba]	8.37	15.04	0.85	9.34	14.87	16.62	5.01	8.18	5.88	3.44	7.65	10.08	10.85	6.71
map00940	Phenylpropanoid biosynthesis	3.17946e-06	TRINITY_DN55260_c1_g1	K01188	EC:3.2.1.21	1.87424	up	BGLU11	beta-glucosidase 11-like [Citrus sinensis]	8.2	21.14	1.71	9.46	26.08	20.26	2.18	11.55	8.03	9.34	7.49	7.77	14.48	7.73
map00940	Phenylpropanoid biosynthesis	3.17946e-06	TRINITY_DN55260_c1_g3	K01188	EC:3.2.1.21	-1.5078	down	BGLU11	beta-glucosidase 11-like isoform X2 [Herrania umbratica]	21.9	27.01	13.02	21.59	40.47	20.02	91.74	96.99	78.51	73.08	90.36	82.53	24	85.54
map00940	Phenylpropanoid biosynthesis	3.17946e-06	TRINITY_DN50180_c1_g2	K01188	EC:3.2.1.21	4.40293	up	BGLU10	beta-glucosidase 12-like [Cicer arietinum]	247.19	103.21	120.67	111.13	201.14	86.96	11.31	9.48	29.43	62.13	42.87	69.72	145.05	37.49
map00941	Flavonoid biosynthesis	0.0108484	TRINITY_DN44130_c0_g1	K08695	EC:1.3.1.77	-1.15031	down	BEN1	putative anthocyanidin reductase [Ricinus communis]	27.67	21.12	24.53	19.91	38.91	25.39	82.87	72.12	79.36	76.65	66.65	67.33	26.25	74.16
map00941	Flavonoid biosynthesis	0.0108484	TRINITY_DN38128_c0_g1	K13065	EC:2.3.1.133	-2.1742	down	BEAT	PREDICTED: acetyl-CoA-benzylalcohol acetyltransferase-like [Populus euphratica]	0.23	0.38	0.26	0.47	0.44	0.41	1.75	1.95	1.72	3.51	1.39	2.61	0.36	2.15
map00940	Phenylpropanoid biosynthesis	3.17946e-06	TRINITY_DN38128_c0_g1	K13065	EC:2.3.1.133	-2.1742	down	BEAT	PREDICTED: acetyl-CoA-benzylalcohol acetyltransferase-like [Populus euphratica]	0.23	0.38	0.26	0.47	0.44	0.41	1.75	1.95	1.72	3.51	1.39	2.61	0.36	2.15
map00941	Flavonoid biosynthesis	0.0108484	TRINITY_DN51787_c2_g3	K13082	EC:1.1.1.219 1.1.1.234	1.55443	up	BAN	anthocyanidin reductase ((2S)-flavan-3-ol-forming) [Sesamum indicum]	0.39	0.72	0.75	0.67	0.68	0.73	0.36	0.3	0.12	0	0.26	0.7	0.66	0.29
map00941	Flavonoid biosynthesis	0.0108484	TRINITY_DN46032_c0_g1	K13065	EC:2.3.1.133	2.88976	up	BAHD1	vinorine synthase-like [Manihot esculenta]	3.03	7.07	4.58	4.13	4.19	4.44	0.68	0.86	0.58	0.79	0.85	0.89	4.57	0.78
map00940	Phenylpropanoid biosynthesis	3.17946e-06	TRINITY_DN46032_c0_g1	K13065	EC:2.3.1.133	2.88976	up	BAHD1	vinorine synthase-like [Manihot esculenta]	3.03	7.07	4.58	4.13	4.19	4.44	0.68	0.86	0.58	0.79	0.85	0.89	4.57	0.78
map00940	Phenylpropanoid biosynthesis	3.17946e-06	TRINITY_DN45216_c1_g1	K05349	EC:3.2.1.21	2.56036	up	BACOVA_02659	uncharacterized protein LOC110626576 [Manihot esculenta]	7.63	2.23	5.28	4.76	10.17	4.99	0.6	1.65	0.4	0.43	1.16	1.68	5.84	0.99
map00360	Phenylalanine metabolism	0.0530213	TRINITY_DN41435_c1_g5	K00815	EC:2.6.1.5	7.6444	up	At5g53970	PREDICTED: nicotianamine aminotransferase A [Elaeis guineensis]	2.19	0	4.26	0.32	0.91	1.43	0	0	0	0	0	0	1.52	0
map00941	Flavonoid biosynthesis	0.0108484	TRINITY_DN43192_c1_g9	K05278	EC:1.14.20.6	1.28556	up	At5g05600	PREDICTED: leucoanthocyanidin dioxygenase [Populus euphratica]	29.38	45.66	20.2	37.58	20.02	30.5	14.14	12.36	10.16	14.5	9.63	12.46	30.56	12.21
map00941	Flavonoid biosynthesis	0.0108484	TRINITY_DN50184_c1_g1	K05278	EC:1.14.20.6	1.79191	up	At5g05600	probable 2-oxoglutarate-dependent dioxygenase At5g05600 [Hevea brasiliensis]	14.37	7.98	24.73	10.76	9.41	16.83	2.2	1.95	5.69	3.87	6.83	12.18	14.01	5.45
map00941	Flavonoid biosynthesis	0.0108484	TRINITY_DN50945_c1_g2	K13065	EC:2.3.1.133	1.25734	up	At4g30660	UPF0057 membrane protein At4g30660-like [Manihot esculenta]	25.28	18.43	40.53	20.98	27.26	23.2	1.71	1.77	13.45	20.81	44.36	31.17	25.95	18.88
map00940	Phenylpropanoid biosynthesis	3.17946e-06	TRINITY_DN50945_c1_g2	K13065	EC:2.3.1.133	1.25734	up	At4g30660	UPF0057 membrane protein At4g30660-like [Manihot esculenta]	25.28	18.43	40.53	20.98	27.26	23.2	1.71	1.77	13.45	20.81	44.36	31.17	25.95	18.88
map00940	Phenylpropanoid biosynthesis	3.17946e-06	TRINITY_DN48673_c1_g1	K06892	EC:1.14.11.-	-2.29306	down	At3g50210	probable 2-oxoglutarate-dependent dioxygenase At3g50210 isoform X1 [Citrus clementina]	2.49	2.87	1.85	2.69	3.66	3.1	18.96	21.52	12.43	10.29	26.2	11.65	2.78	16.84
map00940	Phenylpropanoid biosynthesis	3.17946e-06	TRINITY_DN39605_c2_g3	K01188	EC:3.2.1.21	-1.41604	down	At3g49720	uncharacterized protein At3g49720-like isoform X2 [Hevea brasiliensis]	0.53	0.94	1.62	1.36	2.92	1.17	4	5.54	6.24	7.13	4.68	5.48	1.42	5.51
map00940	Phenylpropanoid biosynthesis	3.17946e-06	TRINITY_DN40596_c0_g1	K01188	EC:3.2.1.21	-2.21699	down	At3g49720	Uncharacterized protein CEY00_Acc06863 [Actinidia chinensis var. chinensis]	5.09	6.91	2.34	4.51	7.18	2	11.96	15.38	14.92	23.19	14.69	19.29	4.67	16.57
map00940	Phenylpropanoid biosynthesis	3.17946e-06	TRINITY_DN49284_c0_g1	K01188	EC:3.2.1.21	-1.74096	down	At3g49720	PREDICTED: uncharacterized protein At3g49720 [Theobroma cacao]	6.62	6.04	5.63	2.63	9.77	7.17	19.54	25.36	24.77	31.87	31.63	28.62	6.31	26.97
map00940	Phenylpropanoid biosynthesis	3.17946e-06	TRINITY_DN52241_c0_g3	K01188	EC:3.2.1.21	-1.40342	down	At3g49720	uncharacterized protein At3g49720-like [Durio zibethinus]	1.08	1.85	1.49	1.88	2	0.81	3.69	4.85	4.91	8.38	3.92	5.55	1.52	5.22
map00941	Flavonoid biosynthesis	0.0108484	TRINITY_DN43558_c0_g1	K05277	EC:1.14.20.4	6.95635	up	At3g11180	probable 2-oxoglutarate-dependent dioxygenase At5g05600 [Populus trichocarpa]	4.94	0.94	10.03	1.91	1.27	6.59	0	0.03	0	0.16	0.05	0	4.28	0.04
map00360	Phenylalanine metabolism	0.0530213	TRINITY_DN49853_c0_g5	K00276	EC:1.4.3.21	1.88625	up	At1g62810	primary amine oxidase [Sesamum indicum]	0.15	0.23	0.35	0.5	0.33	0.46	0.14	0.04	0.04	0.04	0.14	0.29	0.34	0.11
map00940	Phenylpropanoid biosynthesis	3.17946e-06	TRINITY_DN48154_c0_g1	K00430	EC:1.11.1.7	-7.6867	down	At1g21140	PREDICTED: vacuolar iron transporter homolog 1-like [Populus euphratica]	0.07	0.07	0.07	0	0	0	17.17	21.56	6.66	13.01	1.53	4.28	0.04	10.7
map00940	Phenylpropanoid biosynthesis	3.17946e-06	TRINITY_DN53775_c1_g2	K06892	EC:1.14.11.-	3.1916	up	At1g06650	PREDICTED: 1-aminocyclopropane-1-carboxylate oxidase homolog 1-like [Prunus mume]	7.1	5.76	10.14	17.79	7.91	4.48	0.46	0.71	2.1	0.4	3.22	0.91	8.86	1.3
map00940	Phenylpropanoid biosynthesis	3.17946e-06	TRINITY_DN49557_c1_g6	K06892	EC:1.14.11.-	3.08004	up	At1g06620	protein DMR6-LIKE OXYGENASE 1-like [Durio zibethinus]	2.05	45.97	0	3.63	0	33.71	0	3.45	4.81	1.94	0	1.98	14.23	2.03
map00360	Phenylalanine metabolism	0.0530213	TRINITY_DN42514_c1_g1	K14454	EC:2.6.1.1	-1.65504	down	ASP3	aspartate aminotransferase, cytoplasmic-like [Hevea brasiliensis]	8.42	13.41	8.83	7.49	8.13	8.33	29.07	34.9	28.38	39.49	31.95	35.27	9.1	33.18
map00360	Phenylalanine metabolism	0.0530213	TRINITY_DN49069_c0_g2	K14455	EC:2.6.1.1	-1.15322	down	ASP1	PREDICTED: aspartate aminotransferase, mitochondrial isoform X1 [Theobroma cacao]	12.4	18.25	8.53	11.85	12.33	9.85	23.98	26.09	40.88	35.24	37.39	35.97	12.2	33.26
map00360	Phenylalanine metabolism	0.0530213	TRINITY_DN57854_c0_g1	K01426	EC:3.5.1.4	1.47631	up	ARPN	basic blue protein-like [Hevea brasiliensis]	1.86	1.47	1.58	0.46	4.54	2.69	0.45	0.77	0.98	0.73	0.65	2.43	2.1	1
map00360	Phenylalanine metabolism	0.0530213	TRINITY_DN46591_c0_g1	K00276	EC:1.4.3.21	-3.81949	down	AO1	primary amine oxidase [Populus trichocarpa]	2.83	1.97	1.19	0.54	1.3	1.38	38.38	37.19	19.34	26.46	22.16	27.47	1.54	28.5
map00941	Flavonoid biosynthesis	0.0108484	TRINITY_DN35735_c0_g2	K05278	EC:1.14.20.6	1.80661	up	ANS	codeine O-demethylase [Sesamum indicum]	0.74	0.84	1.39	1.26	0.87	1.48	0.45	0.51	0.09	0.08	0.41	0.84	1.1	0.4
map00360	Phenylalanine metabolism	0.0530213	TRINITY_DN43214_c0_g1	K01426	EC:3.5.1.4	-2.02033	down	AMI1	hypothetical protein CUMW_281350 [Citrus unshiu]	9.51	5.14	7.87	9.37	16.1	6.01	28.11	31.96	42.49	35.37	35.95	36.11	9	35
map00360	Phenylalanine metabolism	0.0530213	TRINITY_DN43214_c0_g3	K01426	EC:3.5.1.4	-1.83309	down	AMI1	amidase 1 isoform X2 [Manihot esculenta]	24.1	20.6	21.9	21.82	25.46	24.07	125.46	146.32	112.58	93.39	69.75	74.13	22.99	103.61
map00360	Phenylalanine metabolism	0.0530213	TRINITY_DN56020_c0_g1	K01426	EC:3.5.1.4	-1.96529	down	AMI1	amidase 1 isoform X2 [Manihot esculenta]	34.26	59.31	45.5	45.4	60.03	45.67	276.1	280.09	248.66	214.42	181.02	248.34	48.36	241.44
map00360	Phenylalanine metabolism	0.0530213	TRINITY_DN56020_c0_g4	K01426	EC:3.5.1.4	-1.75598	down	AMI1	amidase 1-like isoform X2 [Hevea brasiliensis]	10.72	12.44	15.11	11.32	16.9	14.57	70.6	81.34	57.94	55.01	39.95	60.03	13.51	60.81
map00940	Phenylpropanoid biosynthesis	3.17946e-06	TRINITY_DN38806_c1_g8	K12355	EC:1.2.1.68	2.75408	up	ALDH2C4	hypothetical protein CISIN_1g038769mg, partial [Citrus sinensis]	2.67	1.51	5.43	6.41	10.74	3.41	1.47	1.21	0.97	1.16	0.24	0.94	5.03	1
map00940	Phenylpropanoid biosynthesis	3.17946e-06	TRINITY_DN41907_c0_g1	K12355	EC:1.2.1.68	2.14915	up	ALDH2C4	Aldehyde dehydrogenase [Handroanthus impetiginosus]	0.3	0.44	0.68	0.5	0.43	0.6	0.12	0.05	0.12	0.05	0.56	0.24	0.49	0.19
map00941	Flavonoid biosynthesis	0.0108484	TRINITY_DN2147_c0_g1	K13065	EC:2.3.1.133	-3.01084	down	ACT	vinorine synthase-like [Hevea brasiliensis]	0.54	0.46	0.38	0.79	0.63	0.39	9.17	9.94	3.17	4.38	2.13	3.75	0.53	5.42
map00941	Flavonoid biosynthesis	0.0108484	TRINITY_DN40556_c0_g5	K13065	EC:2.3.1.133	3.00685	up	ACT	vinorine synthase-like [Hevea brasiliensis]	1.3	0.28	4.69	0.74	0.4	0.97	0	0.08	0.15	0.66	0.15	0.41	1.4	0.24
map00941	Flavonoid biosynthesis	0.0108484	TRINITY_DN41032_c0_g6	K13065	EC:2.3.1.133	6.46622	up	ACT	PREDICTED: vinorine synthase [Theobroma cacao]	122.52	40.41	354.6	69.13	64.74	48.72	2.46	1.66	1.89	1.68	1.53	1.44	116.69	1.78
map00941	Flavonoid biosynthesis	0.0108484	TRINITY_DN41734_c2_g1	K13065	EC:2.3.1.133	6.91294	up	ACT	PREDICTED: vinorine synthase [Theobroma cacao]	464.91	43.74	389.56	69.97	134.49	111.24	1.47	1.2	2.91	2.42	2.9	2.63	202.32	2.26
map00941	Flavonoid biosynthesis	0.0108484	TRINITY_DN41734_c2_g3	K13065	EC:2.3.1.133	6.63016	up	ACT	vinorine synthase-like [Herrania umbratica]	21.91	18.2	6.29	7.55	5.85	19.94	0.63	0.03	0.03	0.17	0.03	0.06	13.29	0.16
map00941	Flavonoid biosynthesis	0.0108484	TRINITY_DN45171_c0_g1	K13065	EC:2.3.1.133	7.47741	up	ACT	PREDICTED: vinorine synthase [Theobroma cacao]	673.24	206.47	533.43	274.82	296.87	211.82	3.06	1.54	2.23	3.32	2.23	2.81	366.11	2.53
map00941	Flavonoid biosynthesis	0.0108484	TRINITY_DN50481_c0_g1	K13065	EC:2.3.1.133	5.94869	up	ACT	vinorine synthase-like [Hevea brasiliensis]	516.88	121.71	1045.32	485.77	332.56	321.94	4.36	4.7	17.47	3.3	5.21	27.46	470.7	10.42
map00941	Flavonoid biosynthesis	0.0108484	TRINITY_DN54794_c0_g3	K13065	EC:2.3.1.133	-1.31724	down	ACT	vinorine synthase [Populus trichocarpa]	3.8	0.82	1.33	3.08	4.52	3.95	10.26	9.61	6.62	9.95	9.03	11.19	2.92	9.44
map00940	Phenylpropanoid biosynthesis	3.17946e-06	TRINITY_DN2147_c0_g1	K13065	EC:2.3.1.133	-3.01084	down	ACT	vinorine synthase-like [Hevea brasiliensis]	0.54	0.46	0.38	0.79	0.63	0.39	9.17	9.94	3.17	4.38	2.13	3.75	0.53	5.42
map00940	Phenylpropanoid biosynthesis	3.17946e-06	TRINITY_DN40556_c0_g5	K13065	EC:2.3.1.133	3.00685	up	ACT	vinorine synthase-like [Hevea brasiliensis]	1.3	0.28	4.69	0.74	0.4	0.97	0	0.08	0.15	0.66	0.15	0.41	1.4	0.24
map00940	Phenylpropanoid biosynthesis	3.17946e-06	TRINITY_DN41032_c0_g6	K13065	EC:2.3.1.133	6.46622	up	ACT	PREDICTED: vinorine synthase [Theobroma cacao]	122.52	40.41	354.6	69.13	64.74	48.72	2.46	1.66	1.89	1.68	1.53	1.44	116.69	1.78
map00940	Phenylpropanoid biosynthesis	3.17946e-06	TRINITY_DN41734_c2_g1	K13065	EC:2.3.1.133	6.91294	up	ACT	PREDICTED: vinorine synthase [Theobroma cacao]	464.91	43.74	389.56	69.97	134.49	111.24	1.47	1.2	2.91	2.42	2.9	2.63	202.32	2.26
map00940	Phenylpropanoid biosynthesis	3.17946e-06	TRINITY_DN41734_c2_g3	K13065	EC:2.3.1.133	6.63016	up	ACT	vinorine synthase-like [Herrania umbratica]	21.91	18.2	6.29	7.55	5.85	19.94	0.63	0.03	0.03	0.17	0.03	0.06	13.29	0.16
map00940	Phenylpropanoid biosynthesis	3.17946e-06	TRINITY_DN45171_c0_g1	K13065	EC:2.3.1.133	7.47741	up	ACT	PREDICTED: vinorine synthase [Theobroma cacao]	673.24	206.47	533.43	274.82	296.87	211.82	3.06	1.54	2.23	3.32	2.23	2.81	366.11	2.53
map00940	Phenylpropanoid biosynthesis	3.17946e-06	TRINITY_DN50481_c0_g1	K13065	EC:2.3.1.133	5.94869	up	ACT	vinorine synthase-like [Hevea brasiliensis]	516.88	121.71	1045.32	485.77	332.56	321.94	4.36	4.7	17.47	3.3	5.21	27.46	470.7	10.42
map00940	Phenylpropanoid biosynthesis	3.17946e-06	TRINITY_DN54794_c0_g3	K13065	EC:2.3.1.133	-1.31724	down	ACT	vinorine synthase [Populus trichocarpa]	3.8	0.82	1.33	3.08	4.52	3.95	10.26	9.61	6.62	9.95	9.03	11.19	2.92	9.44
map00941	Flavonoid biosynthesis	0.0108484	TRINITY_DN48959_c1_g3	K13082	EC:1.1.1.219 1.1.1.234	1.54338	up	A	Cinnamyl alcohol dehydrogenase, 82967-79323, putative isoform 1 [Theobroma cacao]	246.09	199.06	350.98	202.56	190.63	216.87	74.46	75.34	140.01	99.69	114.44	118.48	234.37	103.74
map00940	Phenylpropanoid biosynthesis	3.17946e-06	TRINITY_DN54450_c1_g2	K13066	EC:2.1.1.68	5.92587	up	7OMT	xanthohumol 4-O-methyltransferase [Ricinus communis]	23.17	27.96	120.14	44.94	42.63	50.85	0.9	0.78	1.5	1.26	0.8	1.62	51.62	1.14
map00360	Phenylalanine metabolism	0.0530213	TRINITY_DN45640_c1_g1	K01904	EC:6.2.1.12	-1.91376	down	4CLL7	4-coumarate--CoA ligase-like 7 [Hevea brasiliensis]	2.85	3.06	1.25	1.31	1.55	1.67	8.57	10.96	8.2	11.34	6.71	10.79	1.95	9.43
map00940	Phenylpropanoid biosynthesis	3.17946e-06	TRINITY_DN45640_c1_g1	K01904	EC:6.2.1.12	-1.91376	down	4CLL7	4-coumarate--CoA ligase-like 7 [Hevea brasiliensis]	2.85	3.06	1.25	1.31	1.55	1.67	8.57	10.96	8.2	11.34	6.71	10.79	1.95	9.43
map00360	Phenylalanine metabolism	0.0530213	TRINITY_DN53008_c0_g2	K01904	EC:6.2.1.12	2.7604	up	4CL2	4-coumarate:CoA ligase 1 [Populus trichocarpa x Populus deltoides]	19.01	5.56	34.7	7.87	10.74	11.81	1.99	3.08	1.98	2.15	3.68	5.16	14.95	3.01
map00360	Phenylalanine metabolism	0.0530213	TRINITY_DN53008_c0_g5	K01904	EC:6.2.1.12	6.91039	up	4CL2	AMP-dependent synthetase/ligase [Macleaya cordata]	166.83	71.86	467.66	188.12	204.25	203.64	1.64	1.61	2.71	1.53	2.71	4.68	217.06	2.48
map00360	Phenylalanine metabolism	0.0530213	TRINITY_DN55259_c0_g1	K01904	EC:6.2.1.12	6.80288	up	4CL2	4-coumarate--CoA ligase 2 [Jatropha curcas]	371.52	158.75	1341.27	484.46	395.29	397.84	6.35	6.18	7.58	11.35	15.72	11.2	524.86	9.73
map00940	Phenylpropanoid biosynthesis	3.17946e-06	TRINITY_DN53008_c0_g2	K01904	EC:6.2.1.12	2.7604	up	4CL2	4-coumarate:CoA ligase 1 [Populus trichocarpa x Populus deltoides]	19.01	5.56	34.7	7.87	10.74	11.81	1.99	3.08	1.98	2.15	3.68	5.16	14.95	3.01
map00940	Phenylpropanoid biosynthesis	3.17946e-06	TRINITY_DN53008_c0_g5	K01904	EC:6.2.1.12	6.91039	up	4CL2	AMP-dependent synthetase/ligase [Macleaya cordata]	166.83	71.86	467.66	188.12	204.25	203.64	1.64	1.61	2.71	1.53	2.71	4.68	217.06	2.48
map00940	Phenylpropanoid biosynthesis	3.17946e-06	TRINITY_DN55259_c0_g1	K01904	EC:6.2.1.12	6.80288	up	4CL2	4-coumarate--CoA ligase 2 [Jatropha curcas]	371.52	158.75	1341.27	484.46	395.29	397.84	6.35	6.18	7.58	11.35	15.72	11.2	524.86	9.73
map00360	Phenylalanine metabolism	0.0530213	TRINITY_DN52416_c1_g2	K01904	EC:6.2.1.12	4.72565	up	4CL1	4-coumarate--CoA ligase 1-like [Herrania umbratica]	55.54	33.11	128.72	128.42	35.16	74.9	1.71	3.56	5.12	2.03	2.72	3.72	75.97	3.14
map00940	Phenylpropanoid biosynthesis	3.17946e-06	TRINITY_DN52416_c1_g2	K01904	EC:6.2.1.12	4.72565	up	4CL1	4-coumarate--CoA ligase 1-like [Herrania umbratica]	55.54	33.11	128.72	128.42	35.16	74.9	1.71	3.56	5.12	2.03	2.72	3.72	75.97	3.14
map00360	Phenylalanine metabolism	0.0530213	TRINITY_DN53008_c0_g6	K01904	EC:6.2.1.12	7.66042	up	4CL	hypothetical protein CUMW_026720 [Citrus unshiu]	444.43	148.09	1439.19	589.82	467.56	418.51	2.47	3.24	7.36	1.55	4.5	5.54	584.6	4.11
map00360	Phenylalanine metabolism	0.0530213	TRINITY_DN55259_c0_g3	K01904	EC:6.2.1.12	2.95535	up	4CL	hypothetical protein CUMW_026720 [Citrus unshiu]	25	5	43.27	16.15	13.48	20.31	2.86	3.23	2.84	3.84	3.86	5.32	20.54	3.66
map00940	Phenylpropanoid biosynthesis	3.17946e-06	TRINITY_DN53008_c0_g6	K01904	EC:6.2.1.12	7.66042	up	4CL	hypothetical protein CUMW_026720 [Citrus unshiu]	444.43	148.09	1439.19	589.82	467.56	418.51	2.47	3.24	7.36	1.55	4.5	5.54	584.6	4.11
map00940	Phenylpropanoid biosynthesis	3.17946e-06	TRINITY_DN55259_c0_g3	K01904	EC:6.2.1.12	2.95535	up	4CL	hypothetical protein CUMW_026720 [Citrus unshiu]	25	5	43.27	16.15	13.48	20.31	2.86	3.23	2.84	3.84	3.86	5.32	20.54	3.66
map00940	Phenylpropanoid biosynthesis	3.17946e-06	TRINITY_DN47978_c0_g1	K06892	EC:1.14.11.-	-1.72376	down	2A6	protein DMR6-LIKE OXYGENASE 2-like [Hevea brasiliensis]	2.75	10.68	0.82	4.98	2.72	6.49	20.7	25.85	17.4	19.32	15.17	17.53	4.74	19.33
map00940	Phenylpropanoid biosynthesis	3.17946e-06	TRINITY_DN36727_c0_g1	K00083	EC:1.1.1.195	-2.09833	down	10HGO	8-hydroxygeraniol dehydrogenase [Prunus persica]	10.94	0.64	1.26	0.4	1.25	4.88	27.37	18.73	24.02	6.49	18.09	16.97	3.23	18.61
map00940	Phenylpropanoid biosynthesis	3.17946e-06	TRINITY_DN40526_c2_g9	K00083	EC:1.1.1.195	2.2056	up	10HGO	8-hydroxygeraniol dehydrogenase [Sesamum indicum]	2.49	2.22	1.24	1.59	1.18	0.81	0.41	0.12	0.11	0.15	0.78	0.81	1.59	0.4
map00941	Flavonoid biosynthesis	0.0108484	TRINITY_DN45707_c0_g6	K00660	EC:2.3.1.74	2.00893	up	-	chalcone synthase [Kandelia candel]	419.58	113.21	88.88	20.94	298.12	566.84	5.65	48.06	76.34	64.53	195.84	113.72	251.26	84.02
map00941	Flavonoid biosynthesis	0.0108484	TRINITY_DN46009_c2_g2	K13065	EC:2.3.1.133	-1.27778	down	-	uncharacterized protein LOC111282466 isoform X2 [Durio zibethinus]	4.84	13.13	7.59	15.6	18.26	9.58	37.67	32.83	37.38	38.83	28.75	39.71	11.5	35.86
map00941	Flavonoid biosynthesis	0.0108484	TRINITY_DN49352_c0_g1	K00487	EC:1.14.13.11	5.64184	up	-	PREDICTED: cytochrome P450 CYP73A100-like [Populus euphratica]	5.05	2.11	36.33	15.58	3.86	8.25	0.33	0	0.09	0.55	0.02	0.29	11.86	0.21
map00941	Flavonoid biosynthesis	0.0108484	TRINITY_DN51680_c0_g1	K00660	EC:2.3.1.74	1.86806	up	-	chalcone synthase [Kandelia candel]	1056.79	428.29	205.1	134.18	890.93	1428.23	26.25	142.05	204.72	192.86	594.21	338.48	690.59	249.76
map00360	Phenylalanine metabolism	0.0530213	TRINITY_DN40237_c2_g3	K10775	EC:4.3.1.24	3.45428	up	-	putative phenylalanine ammonia-lyase, partial [Rhizophora mangle]	6.47	2.87	12.57	6.24	1.63	12.61	1.87	0.31	0	0.88	1.54	0.6	7.07	0.87
map00360	Phenylalanine metabolism	0.0530213	TRINITY_DN40237_c2_g5	K10775	EC:4.3.1.24	2.60719	up	-	phenylalanine ammonia-lyase [Sesamum indicum]	0.07	0.11	0.3	0.46	0.21	0.29	0	0.04	0.02	0	0.16	0.09	0.24	0.05
map00360	Phenylalanine metabolism	0.0530213	TRINITY_DN40980_c0_g7	K00815	EC:2.6.1.5	-1.24821	down	-	uncharacterized protein LOC8262414 [Ricinus communis]	4.17	8.04	5.86	3.32	6.87	6.78	20.78	16.94	16.72	21.44	14.89	18.78	5.84	18.26
map00360	Phenylalanine metabolism	0.0530213	TRINITY_DN42395_c1_g3	K01593	EC:4.1.1.28 4.1.1.105	-1.1072	down	-	Uncharacterized protein TCM_041702 isoform 1 [Theobroma cacao]	0.87	2.02	0.88	0.96	1.84	0.63	4.21	3.3	3.62	2.91	2.12	3.26	1.2	3.24
map00360	Phenylalanine metabolism	0.0530213	TRINITY_DN43354_c2_g2	K10775	EC:4.3.1.24	4.8672	up	-	phenylalanine ammonia-lyase 2 [Rhizophora mangle]	101	19.91	409.73	59.28	48.84	126.83	4.56	3.57	5.24	5.36	9.35	5.26	127.6	5.56
map00360	Phenylalanine metabolism	0.0530213	TRINITY_DN45048_c4_g2	K07253	EC:5.3.2.1	-1.54205	down	-	hypothetical protein GOBAR_AA17892 [Gossypium barbadense]	6.48	7	11.57	7.59	14.62	10.97	44.66	40.27	36.45	39.5	22.44	36.54	9.71	36.64
map00360	Phenylalanine metabolism	0.0530213	TRINITY_DN46246_c0_g3	K00276	EC:1.4.3.21	1.01056	up	-	uncharacterized protein LOC110630245 [Manihot esculenta]	23.46	20	5.67	9.69	16.8	11.29	5.12	5.38	7.26	15.42	10.16	11.65	14.48	9.17
map00360	Phenylalanine metabolism	0.0530213	TRINITY_DN48963_c2_g8	K07253	EC:5.3.2.1	1.2386	up	-	Macrophage migration inhibitory factor [Handroanthus impetiginosus]	1.88	1.59	3.13	2.4	2.59	2.35	1.02	1.25	1.25	0.6	1.78	1.96	2.32	1.31
map00360	Phenylalanine metabolism	0.0530213	TRINITY_DN49352_c0_g1	K00487	EC:1.14.13.11	5.64184	up	-	PREDICTED: cytochrome P450 CYP73A100-like [Populus euphratica]	5.05	2.11	36.33	15.58	3.86	8.25	0.33	0	0.09	0.55	0.02	0.29	11.86	0.21
map00360	Phenylalanine metabolism	0.0530213	TRINITY_DN49756_c0_g3	K14454	EC:2.6.1.1	-1.32058	down	-	aspartate aminotransferase, cytoplasmic [Populus trichocarpa]	6.61	12.65	7.05	6.51	9.03	7.55	22.78	22.65	24.78	26.43	24.56	24.36	8.23	24.26
map00360	Phenylalanine metabolism	0.0530213	TRINITY_DN51714_c0_g2	K00276	EC:1.4.3.21	-1.29372	down	-	uncharacterized protein LOC110658877 isoform X1 [Hevea brasiliensis]	3.03	3.14	10.98	2.58	6.5	3.05	6.57	7.64	15.44	37.26	9.27	20.36	4.88	16.09
map00360	Phenylalanine metabolism	0.0530213	TRINITY_DN54748_c1_g2	K01593	EC:4.1.1.28 4.1.1.105	-1.07105	down	-	hypothetical protein COLO4_14887 [Corchorus olitorius]	13.72	7.63	5.56	2.32	10.23	12.41	25.72	22.31	12	14.87	34.96	31.03	8.65	23.48
map00360	Phenylalanine metabolism	0.0530213	TRINITY_DN55906_c3_g6	K01593	EC:4.1.1.28 4.1.1.105	-4.07124	down	-	uncharacterized protein LOC111302161 [Durio zibethinus]	0.35	0.18	0.31	0.19	0.63	0.27	11.88	9	5.06	4.54	6.41	5.48	0.32	7.06
map00360	Phenylalanine metabolism	0.0530213	TRINITY_DN56020_c0_g2	K01426	EC:3.5.1.4	-2.7422	down	-	PREDICTED: LOW QUALITY PROTEIN: amidase 1-like [Populus euphratica]	0.64	0.67	0.6	0.88	0	0.2	3.84	8.67	5.11	4.87	1.65	2.65	0.5	4.46
map00360	Phenylalanine metabolism	0.0530213	TRINITY_DN56172_c0_g8	K00457	EC:1.13.11.27	-1.03233	down	-	uncharacterized protein LOC110663750 [Hevea brasiliensis]	7.44	10.19	5.91	7.63	8.32	8.46	24.21	22.37	20.57	26.69	18.3	16.06	7.99	21.37
map00940	Phenylpropanoid biosynthesis	3.17946e-06	TRINITY_DN40237_c2_g3	K10775	EC:4.3.1.24	3.45428	up	-	putative phenylalanine ammonia-lyase, partial [Rhizophora mangle]	6.47	2.87	12.57	6.24	1.63	12.61	1.87	0.31	0	0.88	1.54	0.6	7.07	0.87
map00940	Phenylpropanoid biosynthesis	3.17946e-06	TRINITY_DN40237_c2_g5	K10775	EC:4.3.1.24	2.60719	up	-	phenylalanine ammonia-lyase [Sesamum indicum]	0.07	0.11	0.3	0.46	0.21	0.29	0	0.04	0.02	0	0.16	0.09	0.24	0.05
map00940	Phenylpropanoid biosynthesis	3.17946e-06	TRINITY_DN43354_c2_g2	K10775	EC:4.3.1.24	4.8672	up	-	phenylalanine ammonia-lyase 2 [Rhizophora mangle]	101	19.91	409.73	59.28	48.84	126.83	4.56	3.57	5.24	5.36	9.35	5.26	127.6	5.56
map00940	Phenylpropanoid biosynthesis	3.17946e-06	TRINITY_DN44314_c0_g7	K00430	EC:1.11.1.7	-1.09129	down	-	uncharacterized protein LOC110616548 [Manihot esculenta]	2.95	3.89	2.25	3.12	4.1	2.87	9.4	8.65	8.64	9.81	7.74	7.84	3.2	8.68
map00940	Phenylpropanoid biosynthesis	3.17946e-06	TRINITY_DN45867_c0_g1	K00430	EC:1.11.1.7	1.25701	up	-	CCHC-type integrase [Populus trichocarpa]	54.04	103.13	69.69	107.34	68.75	40.83	46.02	52.3	41.03	62.15	35.57	51.96	73.96	48.17
map00940	Phenylpropanoid biosynthesis	3.17946e-06	TRINITY_DN45934_c0_g2	K09753	EC:1.2.1.44	-4.16448	down	-	cinnamoyl-CoA reductase-like SNL6 isoform X1 [Hevea brasiliensis]	4.86	3.69	3.76	2.71	4.61	3.52	113.2	103.07	79.52	113.38	56.56	88.59	3.86	92.39
map00940	Phenylpropanoid biosynthesis	3.17946e-06	TRINITY_DN46009_c2_g2	K13065	EC:2.3.1.133	-1.27778	down	-	uncharacterized protein LOC111282466 isoform X2 [Durio zibethinus]	4.84	13.13	7.59	15.6	18.26	9.58	37.67	32.83	37.38	38.83	28.75	39.71	11.5	35.86
map00940	Phenylpropanoid biosynthesis	3.17946e-06	TRINITY_DN47099_c1_g1	K01188	EC:3.2.1.21	-3.88781	down	-	Retrovirus-related Pol polyprotein from transposon RE1 [Vitis vinifera]	0.14	0.67	0.09	0.1	0.18	0.28	3.34	3.98	3.08	7.22	4.95	5.19	0.24	4.63
map00940	Phenylpropanoid biosynthesis	3.17946e-06	TRINITY_DN49352_c0_g1	K00487	EC:1.14.13.11	5.64184	up	-	PREDICTED: cytochrome P450 CYP73A100-like [Populus euphratica]	5.05	2.11	36.33	15.58	3.86	8.25	0.33	0	0.09	0.55	0.02	0.29	11.86	0.21
map00940	Phenylpropanoid biosynthesis	3.17946e-06	TRINITY_DN49390_c1_g1	K00083	EC:1.1.1.195	2.76672	up	-	PREDICTED: probable cinnamyl alcohol dehydrogenase 1 [Vitis vinifera]	108.22	137.61	101.81	197.11	147.16	113.52	28.49	28.72	20.68	25.74	26.08	24.94	134.24	25.77
map00940	Phenylpropanoid biosynthesis	3.17946e-06	TRINITY_DN50728_c2_g9	K05350	EC:3.2.1.21	-3.11384	down	-	beta-glucosidase 44 [Prunus persica]	1.98	0	2.05	0	0	2.06	16.63	26.41	9.9	18.64	1.99	0.94	1.01	12.42
map00940	Phenylpropanoid biosynthesis	3.17946e-06	TRINITY_DN53288_c0_g3	K09753	EC:1.2.1.44	1.44048	up	-	hypothetical protein JCGZ_09580 [Jatropha curcas]	11.69	13.18	7.34	9.65	8.74	12.93	7.28	5.92	5.16	5.31	7.01	2.81	10.59	5.58
map00940	Phenylpropanoid biosynthesis	3.17946e-06	TRINITY_DN56193_c1_g2	K00430	EC:1.11.1.7	-2.71486	down	-	peroxidase 29-like [Quercus suber]	0.93	0.77	3.69	2.5	2.34	1.96	20.63	25.69	18.61	15.48	12.27	17.91	2.03	18.43
					2.4.1.111

## Sheet:  A.marina
PathwayEntry	PathwayDefinition	pvalue	Gene_ID	KOEntry	EC	log2FC	regulation	Name	Annotation	Am_CS_1_TPM	Am_CS_2_TPM	Am_CS_3_TPM	Am_CS_4_TPM	Am_CS_5_TPM	Am_CS_6_TPM	Am_CK_1_TPM	Am_CK_2_TPM	Am_CK_3_TPM	Am_CK_4_TPM	Am_CK_5_TPM	Am_CK_6_TPM	Am_CS_mean_TPM	Am_CK_mean_TPM
map00941	Flavonoid biosynthesis	0.208396	TRINITY_DN43382_c2_g1	K01859	EC:5.5.1.6	-1.62256	down	VSR6	vacuolar-sorting receptor 6 [Sesamum indicum]	35.55	16.97	11.77	33.78	29.59	26.45	125.71	92.49	154.47	129.77	118.96	163.48	25.68	130.81
map00940	Phenylpropanoid biosynthesis	0.0161881	TRINITY_DN50548_c2_g12	K12356	EC:2.4.1.111	4.14979	up	UGT72E3	anthocyanidin 3-O-glucosyltransferase 5-like [Sesamum indicum]	6.19	8.59	8.7	7.02	9.2	12.04	0.47	0.83	0.5	0.82	2.56	0.31	8.62	0.91
map00360	Phenylalanine metabolism	0.520264	TRINITY_DN53299_c2_g13	K01593	EC:4.1.1.28 4.1.1.105	4.57459	up	TYDC1	tyrosine/DOPA decarboxylase 1-like [Sesamum indicum]	0.43	13.81	15.8	0.23	23.49	42.53	2.5	1.06	1.07	0.82	0.12	2.02	16.05	1.26
map00360	Phenylalanine metabolism	0.520264	TRINITY_DN53299_c2_g14	K01593	EC:4.1.1.28 4.1.1.105	4.72043	up	TYDC1	Aromatic-L-amino-acid/L-histidine decarboxylase [Handroanthus impetiginosus]	10.19	40.51	23.86	6.99	32.33	43.55	3.11	1.47	0.68	2.5	1.95	1.62	26.24	1.89
map00941	Flavonoid biosynthesis	0.208396	TRINITY_DN54450_c1_g1	K08695	EC:1.3.1.77	2.95149	up	TKPR2	PREDICTED: cinnamoyl-CoA reductase 1-like [Erythranthe guttata]	0.44	0.28	0.31	0.46	2.82	3.11	0.32	0.19	0.43	0.09	0.35	0.14	1.24	0.25
map00940	Phenylpropanoid biosynthesis	0.0161881	TRINITY_DN43189_c1_g2	K09753	EC:1.2.1.44	-1.27731	down	TKPR1	Flavonol reductase/cinnamoyl-CoA reductase [Handroanthus impetiginosus]	112.7	81.19	74.16	96.71	63.95	64.78	319.44	343.11	458.14	276.79	280.96	416.6	82.25	349.17
map00940	Phenylpropanoid biosynthesis	0.0161881	TRINITY_DN43703_c3_g4	K09753	EC:1.2.1.44	3.68705	up	TKPR1	cinnamoyl-CoA reductase 1-like [Dorcoceras hygrometricum]	5.37	2.31	0.83	7.13	1.41	1.9	0	0.64	0.13	0.38	0.66	0.48	3.16	0.38
map00940	Phenylpropanoid biosynthesis	0.0161881	TRINITY_DN46011_c2_g6	K09753	EC:1.2.1.44	1.2057	up	TKPR1	cinnamoyl-CoA reductase 1 [Sesamum indicum]	16.58	10.44	6.19	13.76	53.69	46.48	27.72	28.57	6.7	21.02	12.21	22.99	24.52	19.87
map00941	Flavonoid biosynthesis	0.208396	TRINITY_DN20228_c0_g1	K05278	EC:1.14.20.6	9.26828	up	SRG1	PREDICTED: protein SRG1-like [Erythranthe guttata]	0.76	11.24	3.34	0.19	4.26	6.03	0	0	0	0	0	0.05	4.3	0.01
map00941	Flavonoid biosynthesis	0.208396	TRINITY_DN52653_c4_g1	K05278	EC:1.14.20.6	-1.79735	down	SRG1	Iron/ascorbate family oxidoreductase [Handroanthus impetiginosus]	0.47	0.69	0.81	0.14	0.99	0.16	3.55	2.45	6.72	2.87	0.1	6.72	0.54	3.73
map00360	Phenylalanine metabolism	0.520264	TRINITY_DN45008_c1_g2	K01426	EC:3.5.1.4	-1.01283	down	SPAC869.01	putative amidase C869.01 [Sesamum indicum]	3.11	2.23	1.58	3.67	1.69	2.58	4.33	5.93	5.01	8.6	12.84	5.75	2.48	7.08
map00940	Phenylpropanoid biosynthesis	0.0161881	TRINITY_DN45048_c4_g8	K09753	EC:1.2.1.44	1.32671	up	SNL6	Flavonol reductase/cinnamoyl-CoA reductase [Handroanthus impetiginosus]	2.32	12.35	4.79	1.55	10.35	12.36	6.12	3.45	3.51	3.37	2.04	8.07	7.29	4.43
map00940	Phenylpropanoid biosynthesis	0.0161881	TRINITY_DN40684_c2_g3	K13065	EC:2.3.1.133	1.86115	up	SHT	spermidine hydroxycinnamoyl transferase [Sesamum indicum]	17.25	19.51	23.23	31.21	20.1	25.1	11.08	4.1	8.26	15.09	17.07	14.48	22.73	11.68
map00941	Flavonoid biosynthesis	0.208396	TRINITY_DN40684_c2_g3	K13065	EC:2.3.1.133	1.86115	up	SHT	spermidine hydroxycinnamoyl transferase [Sesamum indicum]	17.25	19.51	23.23	31.21	20.1	25.1	11.08	4.1	8.26	15.09	17.07	14.48	22.73	11.68
map00940	Phenylpropanoid biosynthesis	0.0161881	TRINITY_DN40684_c2_g4	K13065	EC:2.3.1.133	2.42473	up	SHT	spermidine hydroxycinnamoyl transferase [Sesamum indicum]	38.26	56.76	63.74	40.77	27.23	36.41	15.3	16.98	6.04	19.42	21.3	16.49	43.86	15.92
map00941	Flavonoid biosynthesis	0.208396	TRINITY_DN40684_c2_g4	K13065	EC:2.3.1.133	2.42473	up	SHT	spermidine hydroxycinnamoyl transferase [Sesamum indicum]	38.26	56.76	63.74	40.77	27.23	36.41	15.3	16.98	6.04	19.42	21.3	16.49	43.86	15.92
map00940	Phenylpropanoid biosynthesis	0.0161881	TRINITY_DN50508_c3_g6	K13065	EC:2.3.1.133	1.93298	up	SHT	spermidine hydroxycinnamoyl transferase [Sesamum indicum]	72.09	94.08	77.93	77.02	46.26	54.59	35.07	34.66	15.27	37.05	53.97	33.28	70.33	34.88
map00941	Flavonoid biosynthesis	0.208396	TRINITY_DN50508_c3_g6	K13065	EC:2.3.1.133	1.93298	up	SHT	spermidine hydroxycinnamoyl transferase [Sesamum indicum]	72.09	94.08	77.93	77.02	46.26	54.59	35.07	34.66	15.27	37.05	53.97	33.28	70.33	34.88
map00940	Phenylpropanoid biosynthesis	0.0161881	TRINITY_DN4987_c0_g1	K13065	EC:2.3.1.133	-1.26205	down	SALAT	vinorine synthase [Sesamum indicum]	1.05	0.26	0.45	1.27	0.99	0.48	4.79	1.65	2.24	3.11	3.1	3.51	0.75	3.07
map00941	Flavonoid biosynthesis	0.208396	TRINITY_DN4987_c0_g1	K13065	EC:2.3.1.133	-1.26205	down	SALAT	vinorine synthase [Sesamum indicum]	1.05	0.26	0.45	1.27	0.99	0.48	4.79	1.65	2.24	3.11	3.1	3.51	0.75	3.07
map00940	Phenylpropanoid biosynthesis	0.0161881	TRINITY_DN41159_c3_g7	K13065	EC:2.3.1.133	3.30535	up	RAS	rosmarinic acid synthase [Perilla frutescens]	3.56	0.75	0.92	1.58	14.74	6.55	1.05	0.52	0.49	1.74	0.15	0.75	4.68	0.78
map00941	Flavonoid biosynthesis	0.208396	TRINITY_DN41159_c3_g7	K13065	EC:2.3.1.133	3.30535	up	RAS	rosmarinic acid synthase [Perilla frutescens]	3.56	0.75	0.92	1.58	14.74	6.55	1.05	0.52	0.49	1.74	0.15	0.75	4.68	0.78
map00940	Phenylpropanoid biosynthesis	0.0161881	TRINITY_DN38972_c0_g1	K00430	EC:1.11.1.7	4.66081	up	PRX74	PREDICTED: peroxidase 27-like [Erythranthe guttata]	0.82	13.99	16.09	0.09	1.79	6.45	1.81	0.84	0.87	0.7	0.11	0.76	6.54	0.85
map00940	Phenylpropanoid biosynthesis	0.0161881	TRINITY_DN41060_c0_g1	K00430	EC:1.11.1.7	9.61001	up	poxN1	Peroxidase [Handroanthus impetiginosus]	1.35	165.36	162.15	1	6.58	8.67	0.3	0	0.05	0	0.29	0.41	57.52	0.17
map00940	Phenylpropanoid biosynthesis	0.0161881	TRINITY_DN40676_c0_g5	K00430	EC:1.11.1.7	4.96959	up	PER9	peroxidase 9 [Sesamum indicum]	16.56	6.97	4.35	32.35	6.35	18.75	0.39	0.48	0.78	0.36	1.89	0.62	14.22	0.75
map00940	Phenylpropanoid biosynthesis	0.0161881	TRINITY_DN39453_c1_g6	K00430	EC:1.11.1.7	-4.68933	down	PER70	Peroxidase [Handroanthus impetiginosus]	0	0.32	0.36	0.1	0.05	0.06	0.55	1.04	17.08	0.16	0.06	33.69	0.15	8.76
map00940	Phenylpropanoid biosynthesis	0.0161881	TRINITY_DN10188_c0_g1	K00430	EC:1.11.1.7	-2.73132	down	PER66	peroxidase 66 [Sesamum indicum]	0.23	0.49	0.42	0.1	0.06	0.06	0.17	0.11	2.91	0.28	0.06	16.67	0.23	3.37
map00940	Phenylpropanoid biosynthesis	0.0161881	TRINITY_DN58971_c0_g1	K00430	EC:1.11.1.7	-3.51049	down	PER64	peroxidase 64 [Sesamum indicum]	0.06	0.17	0.12	0.16	0	0.12	0.79	0.34	3.5	0.62	0.11	9.01	0.1	2.4
map00940	Phenylpropanoid biosynthesis	0.0161881	TRINITY_DN52196_c0_g8	K00430	EC:1.11.1.7	-1.93922	down	PER42	secretory peroxidase [Avicennia marina]	55.98	62.19	141.71	6.42	47.44	40.39	169.12	578.41	761.41	108.37	3.57	1304.99	59.02	487.64
map00940	Phenylpropanoid biosynthesis	0.0161881	TRINITY_DN56331_c2_g1	K00430	EC:1.11.1.7	-2.27228	down	PER31	Peroxidase [Handroanthus impetiginosus]	0.52	0.33	0.82	0.15	0.49	0.13	3.1	2.34	8.01	1.45	0.25	8.74	0.41	3.98
map00940	Phenylpropanoid biosynthesis	0.0161881	TRINITY_DN23229_c0_g1	K00430	EC:1.11.1.7	-1.87992	down	PER3	peroxidase 3 [Sesamum indicum]	1.4	1.43	3.92	0.39	0.41	0.76	6.53	6.06	19.5	2.89	0.85	27.48	1.39	10.55
map00940	Phenylpropanoid biosynthesis	0.0161881	TRINITY_DN28465_c0_g1	K00430	EC:1.11.1.7	-2.119	down	PER12	Peroxidase [Handroanthus impetiginosus]	3.3	2.44	1.93	5.84	1.54	0.69	19.05	10.74	19.81	14.84	11.37	46.31	2.62	20.35
map00940	Phenylpropanoid biosynthesis	0.0161881	TRINITY_DN28465_c0_g2	K00430	EC:1.11.1.7	2.92607	up	PER12	peroxidase 12 [Jatropha curcas]	10.45	3.75	0	10.14	1.08	2.92	0.35	0.35	0	1.74	1.44	2.01	4.72	0.98
map00940	Phenylpropanoid biosynthesis	0.0161881	TRINITY_DN39522_c1_g16	K00430	EC:1.11.1.7	3.45778	up	PER12	Peroxidase [Handroanthus impetiginosus]	3.55	4.86	2.98	5.61	1.69	5.06	0.37	0.18	0.36	0.61	0.99	1.4	3.96	0.65
map00360	Phenylalanine metabolism	0.520264	TRINITY_DN40547_c1_g2	K01426	EC:3.5.1.4	1.87391	up	OM64	outer envelope protein 64, mitochondrial [Sesamum indicum]	9.71	13.45	11.81	12.2	8.45	19.96	4.6	6.71	5.25	6.38	4.86	2.82	12.6	5.1
map00360	Phenylalanine metabolism	0.520264	TRINITY_DN34425_c0_g1	K07253	EC:5.3.2.1	1.77201	up	Mif	hypothetical protein GPECTOR_18g137 [Gonium pectorale]	6.24	5.84	5.9	4.86	5.35	4.9	3.12	2.28	3.31	1.01	3.97	4.29	5.51	3
map00360	Phenylalanine metabolism	0.520264	TRINITY_DN48114_c0_g3	K00276	EC:1.4.3.21	-1.16865	down	maoI	uncharacterized protein LOC105157267 [Sesamum indicum]	3.91	2.25	2.04	2.98	4.7	2.49	7.65	19.65	12.85	8.94	12.27	10.27	3.06	11.94
map00940	Phenylpropanoid biosynthesis	0.0161881	TRINITY_DN40207_c0_g1	K06892	EC:1.14.11.-	2.85284	up	IQM6	IQ domain-containing protein IQM6 [Sesamum indicum]	2.02	1.64	2.5	4.45	1.76	4.06	0.61	0.48	0.55	0.59	0.87	1.09	2.74	0.7
map00940	Phenylpropanoid biosynthesis	0.0161881	TRINITY_DN45948_c0_g3	K06892	EC:1.14.11.-	6.38165	up	IQM2	IQ domain-containing protein IQM2 [Sesamum indicum]	0.7	5.04	12.73	1.81	0.98	3.15	0	0.06	0	0	0.25	0.34	4.07	0.11
map00940	Phenylpropanoid biosynthesis	0.0161881	TRINITY_DN46126_c0_g1	K13065	EC:2.3.1.133	-1.72767	down	HST	shikimate O-hydroxycinnamoyltransferase [Sesamum indicum]	7.51	6.07	2.8	10.1	13.7	11.56	55.73	35.7	44.73	33.59	25.66	49.96	8.62	40.9
map00941	Flavonoid biosynthesis	0.208396	TRINITY_DN46126_c0_g1	K13065	EC:2.3.1.133	-1.72767	down	HST	shikimate O-hydroxycinnamoyltransferase [Sesamum indicum]	7.51	6.07	2.8	10.1	13.7	11.56	55.73	35.7	44.73	33.59	25.66	49.96	8.62	40.9
map00940	Phenylpropanoid biosynthesis	0.0161881	TRINITY_DN46126_c0_g5	K13065	EC:2.3.1.133	-1.03141	down	HST	shikimate O-hydroxycinnamoyltransferase [Sesamum indicum]	3.49	2.94	2.85	3.7	9.82	5.38	21.04	19.87	15.93	18.49	10.2	14	4.7	16.59
map00941	Flavonoid biosynthesis	0.208396	TRINITY_DN46126_c0_g5	K13065	EC:2.3.1.133	-1.03141	down	HST	shikimate O-hydroxycinnamoyltransferase [Sesamum indicum]	3.49	2.94	2.85	3.7	9.82	5.38	21.04	19.87	15.93	18.49	10.2	14	4.7	16.59
map00940	Phenylpropanoid biosynthesis	0.0161881	TRINITY_DN46126_c0_g6	K13065	EC:2.3.1.133	-1.11464	down	HST	shikimate O-hydroxycinnamoyltransferase [Sesamum indicum]	34.57	28.68	19.79	45.14	46.3	37.88	183.58	124.71	110.05	116.63	143.25	117.87	35.39	132.68
map00941	Flavonoid biosynthesis	0.208396	TRINITY_DN46126_c0_g6	K13065	EC:2.3.1.133	-1.11464	down	HST	shikimate O-hydroxycinnamoyltransferase [Sesamum indicum]	34.57	28.68	19.79	45.14	46.3	37.88	183.58	124.71	110.05	116.63	143.25	117.87	35.39	132.68
map00940	Phenylpropanoid biosynthesis	0.0161881	TRINITY_DN49997_c0_g1	K13065	EC:2.3.1.133	-2.20144	down	HST	shikimate O-hydroxycinnamoyltransferase precursor [Gossypium hirsutum]	1.03	0.87	1.69	2.15	1.24	1.37	5.15	5.45	12.57	2.69	2.91	57.73	1.39	14.42
map00941	Flavonoid biosynthesis	0.208396	TRINITY_DN49997_c0_g1	K13065	EC:2.3.1.133	-2.20144	down	HST	shikimate O-hydroxycinnamoyltransferase precursor [Gossypium hirsutum]	1.03	0.87	1.69	2.15	1.24	1.37	5.15	5.45	12.57	2.69	2.91	57.73	1.39	14.42
map00940	Phenylpropanoid biosynthesis	0.0161881	TRINITY_DN42423_c0_g10	K12356	EC:2.4.1.111	2.69702	up	GT5	anthocyanidin 3-O-glucosyltransferase 5-like [Sesamum indicum]	11.47	18.71	15.23	19.5	22.09	38.92	6.98	3.79	4.13	4.7	9.26	5.86	20.99	5.79
map00940	Phenylpropanoid biosynthesis	0.0161881	TRINITY_DN42423_c0_g2	K12356	EC:2.4.1.111	-1.62776	down	GT5	anthocyanidin 3-O-glucosyltransferase 5-like [Sesamum indicum]	8.14	4.65	1.81	10.36	14.86	7.72	38.54	28.78	34.33	55.84	56.7	28.69	7.92	40.48
map00940	Phenylpropanoid biosynthesis	0.0161881	TRINITY_DN36087_c0_g1	K00430	EC:1.11.1.7	8.45943	up	GSVIVT00037159001	peroxidase 5-like [Olea europaea var. sylvestris]	3.11	25.75	58.55	3.58	15.83	27.69	0.25	0.03	0	0.12	0.32	0.09	22.42	0.13
map00940	Phenylpropanoid biosynthesis	0.0161881	TRINITY_DN39711_c0_g1	K00430	EC:1.11.1.7	-1.46877	down	GSVIVT00023967001	peroxidase P7 [Sesamum indicum]	0.79	0.86	1.24	3.04	1.59	0.56	3.22	2.71	2.39	0.87	18.31	11.36	1.35	6.48
map00940	Phenylpropanoid biosynthesis	0.0161881	TRINITY_DN45067_c0_g5	K05349	EC:3.2.1.21	5.62611	up	gluA	protodioscin 26-O-beta-D-glucosidase [Handroanthus impetiginosus]	154.08	147.47	140.96	117.71	136.94	305.48	5.12	5.4	8.27	4.63	2.12	11.5	167.11	6.17
map00940	Phenylpropanoid biosynthesis	0.0161881	TRINITY_DN40624_c0_g1	K01188	EC:3.2.1.21	4.46955	up	GLU	Beta-glucosidase, lactase phlorizinhydrolase [Handroanthus impetiginosus]	4.27	15.1	28.47	2.08	4.07	6.88	0.32	0.39	0.4	0.29	0.07	1.93	10.14	0.57
map00941	Flavonoid biosynthesis	0.208396	TRINITY_DN54413_c0_g5	K05278	EC:1.14.20.6	1.91487	up	FL	Iron/ascorbate family oxidoreductase [Handroanthus impetiginosus]	6.48	8.25	7.27	8.58	5.19	10.77	4.77	3.02	3.04	2.73	3.62	5.49	7.76	3.78
map00940	Phenylpropanoid biosynthesis	0.0161881	TRINITY_DN36894_c0_g1	K06892	EC:1.14.11.-	1.91594	up	DMR6	protein DOWNY MILDEW RESISTANCE 6 [Sesamum indicum]	0.91	1.9	7.64	0.77	5.72	7.49	0.28	0.52	0.14	0.56	3.86	3.76	4.07	1.52
map00941	Flavonoid biosynthesis	0.208396	TRINITY_DN45039_c3_g2	K00475	EC:1.14.11.9	2.60827	up	DMR6	protein DOWNY MILDEW RESISTANCE 6-like [Sesamum indicum]	0.87	2.6	3.83	0.13	1.63	5.11	0.05	0.08	0.18	0	0.19	4.19	2.36	0.78
map00941	Flavonoid biosynthesis	0.208396	TRINITY_DN45039_c3_g4	K00475	EC:1.14.11.9	-2.35902	down	DMR6	protein DOWNY MILDEW RESISTANCE 6-like [Sesamum indicum]	0.4	0	0.07	2.29	0.53	0.66	4.54	2.34	1.13	7.5	6.42	10.19	0.66	5.35
map00941	Flavonoid biosynthesis	0.208396	TRINITY_DN35510_c0_g1	K05278	EC:1.14.20.6	-2.23558	down	DLO2	protein DMR6-LIKE OXYGENASE 2 isoform X1 [Sesamum indicum]	1.84	0.68	0.14	1.84	1.97	1.02	8.19	3.77	4.67	12.15	11.09	18.14	1.25	9.67
map00940	Phenylpropanoid biosynthesis	0.0161881	TRINITY_DN38611_c0_g2	K06892	EC:1.14.11.-	2.69551	up	DLO1	protein DMR6-LIKE OXYGENASE 1 [Sesamum indicum]	14.82	7.05	4.91	4.85	2.33	8.53	0.51	6.68	0.99	0.77	1.08	0.29	7.08	1.72
map00941	Flavonoid biosynthesis	0.208396	TRINITY_DN54672_c3_g1	K05278	EC:1.14.20.6	-2.33024	down	DIOX2	Iron/ascorbate family oxidoreductase [Handroanthus impetiginosus]	6.93	4.17	3.95	10.34	4.56	9.15	53.39	40.44	42.45	28.15	32.36	76.14	6.52	45.49
map00940	Phenylpropanoid biosynthesis	0.0161881	TRINITY_DN42610_c0_g3	K06892	EC:1.14.11.-	-2.87026	down	D4H	1-aminocyclopropane-1-carboxylate oxidase homolog 1 isoform X1 [Sesamum indicum]	0	0.19	0.75	0.18	0.1	0	2.52	2.63	7.8	1.54	2.52	3.9	0.2	3.48
map00940	Phenylpropanoid biosynthesis	0.0161881	TRINITY_DN45251_c0_g1	K09755	EC:1.14.-.-	-1.65516	down	CYP84A1	cytochrome P450 84A1-like [Hevea brasiliensis]	0.46	0.45	0.06	0.05	0.06	0.06	1.36	0.9	1.48	1.22	1.1	0.41	0.19	1.08
map00940	Phenylpropanoid biosynthesis	0.0161881	TRINITY_DN52893_c0_g2	K09755	EC:1.14.-.-	-1.5831	down	CYP84A1	cytochrome P450 84A1-like [Sesamum indicum]	10.38	8.97	3.75	12.58	8.72	3.73	45.19	57.44	43.34	33.17	18.41	25.71	8.02	37.21
map00940	Phenylpropanoid biosynthesis	0.0161881	TRINITY_DN41041_c0_g1	K13066	EC:2.1.1.68	-2.48502	down	COMT1	caffeic acid O-methyltransferase [Catalpa bungei]	0.47	1.4	1.93	0.77	0.33	0.35	5.86	7	7.32	4.37	4.26	18.28	0.88	7.85
map00940	Phenylpropanoid biosynthesis	0.0161881	TRINITY_DN27307_c0_g1	K13065	EC:2.3.1.133	-3.31903	down	CER26L	acyl transferase 5 [Sesamum indicum]	0	0.19	0.36	0	0	0	4.24	2.92	4.03	1.12	0	0.34	0.09	2.11
map00941	Flavonoid biosynthesis	0.208396	TRINITY_DN27307_c0_g1	K13065	EC:2.3.1.133	-3.31903	down	CER26L	acyl transferase 5 [Sesamum indicum]	0	0.19	0.36	0	0	0	4.24	2.92	4.03	1.12	0	0.34	0.09	2.11
map00940	Phenylpropanoid biosynthesis	0.0161881	TRINITY_DN27307_c0_g2	K13065	EC:2.3.1.133	-2.48425	down	CER26L	acyl transferase 5 [Sesamum indicum]	0.15	0.09	0.61	0.26	0.23	0.1	1.94	1.56	9.03	0.42	0.57	2.84	0.24	2.73
map00941	Flavonoid biosynthesis	0.208396	TRINITY_DN27307_c0_g2	K13065	EC:2.3.1.133	-2.48425	down	CER26L	acyl transferase 5 [Sesamum indicum]	0.15	0.09	0.61	0.26	0.23	0.1	1.94	1.56	9.03	0.42	0.57	2.84	0.24	2.73
map00940	Phenylpropanoid biosynthesis	0.0161881	TRINITY_DN42858_c1_g6	K13065	EC:2.3.1.133	-4.46012	down	CER26L	protein ECERIFERUM 26-like [Sesamum indicum]	0.87	0.95	1.29	0.65	0.53	0.22	30.06	11.62	48.85	14.26	4.33	85.11	0.75	32.37
map00941	Flavonoid biosynthesis	0.208396	TRINITY_DN42858_c1_g6	K13065	EC:2.3.1.133	-4.46012	down	CER26L	protein ECERIFERUM 26-like [Sesamum indicum]	0.87	0.95	1.29	0.65	0.53	0.22	30.06	11.62	48.85	14.26	4.33	85.11	0.75	32.37
map00940	Phenylpropanoid biosynthesis	0.0161881	TRINITY_DN52397_c0_g2	K13065	EC:2.3.1.133	-2.70239	down	CER2	Shikimate O-hydroxycinnamoyltransferase [Handroanthus impetiginosus]	0.6	1.09	0.85	0.6	0.69	0.26	11.88	6.95	8.63	11.29	3.28	8.96	0.68	8.5
map00941	Flavonoid biosynthesis	0.208396	TRINITY_DN52397_c0_g2	K13065	EC:2.3.1.133	-2.70239	down	CER2	Shikimate O-hydroxycinnamoyltransferase [Handroanthus impetiginosus]	0.6	1.09	0.85	0.6	0.69	0.26	11.88	6.95	8.63	11.29	3.28	8.96	0.68	8.5
map00940	Phenylpropanoid biosynthesis	0.0161881	TRINITY_DN5815_c0_g1	K13065	EC:2.3.1.133	-4.23182	down	CER2	protein ECERIFERUM 2-like [Sesamum indicum]	0.2	0	0	0.2	0.16	0.04	6.56	1.54	2.87	3.82	0.62	3.12	0.1	3.09
map00941	Flavonoid biosynthesis	0.208396	TRINITY_DN5815_c0_g1	K13065	EC:2.3.1.133	-4.23182	down	CER2	protein ECERIFERUM 2-like [Sesamum indicum]	0.2	0	0	0.2	0.16	0.04	6.56	1.54	2.87	3.82	0.62	3.12	0.1	3.09
map00940	Phenylpropanoid biosynthesis	0.0161881	TRINITY_DN41394_c0_g1	K09753	EC:1.2.1.44	-3.42787	down	CCR1	cinnamoyl-CoA reductase [Paulownia sp. ZKC-2008]	0.05	0.1	2.06	0	0.1	0	3.49	1.87	10.3	0.44	0.05	21.37	0.39	6.25
map00940	Phenylpropanoid biosynthesis	0.0161881	TRINITY_DN45204_c0_g1	K00588	EC:2.1.1.104	-2.40711	down	CCOAOMT1	caffeoyl-CoA O-methyltransferase 5 [Prunus yedoensis var. nudiflora]	3.48	8.21	5.21	3.17	4.21	2.25	51.23	37.09	87.16	25.38	5.84	65.62	4.42	45.39
map00941	Flavonoid biosynthesis	0.208396	TRINITY_DN45204_c0_g1	K00588	EC:2.1.1.104	-2.40711	down	CCOAOMT1	caffeoyl-CoA O-methyltransferase 5 [Prunus yedoensis var. nudiflora]	3.48	8.21	5.21	3.17	4.21	2.25	51.23	37.09	87.16	25.38	5.84	65.62	4.42	45.39
map00360	Phenylalanine metabolism	0.520264	TRINITY_DN45204_c0_g1	K00588	EC:2.1.1.104	-2.40711	down	CCOAOMT1	caffeoyl-CoA O-methyltransferase 5 [Prunus yedoensis var. nudiflora]	3.48	8.21	5.21	3.17	4.21	2.25	51.23	37.09	87.16	25.38	5.84	65.62	4.42	45.39
map00940	Phenylpropanoid biosynthesis	0.0161881	TRINITY_DN45841_c0_g1	K00588	EC:2.1.1.104	-3.19035	down	CCOAOMT1	PREDICTED: caffeoyl-CoA O-methyltransferase [Erythranthe guttata]	0.62	5.73	9.92	0.42	0.84	0.76	61	46.79	160.76	15.79	0.24	98.61	3.05	63.87
map00941	Flavonoid biosynthesis	0.208396	TRINITY_DN45841_c0_g1	K00588	EC:2.1.1.104	-3.19035	down	CCOAOMT1	PREDICTED: caffeoyl-CoA O-methyltransferase [Erythranthe guttata]	0.62	5.73	9.92	0.42	0.84	0.76	61	46.79	160.76	15.79	0.24	98.61	3.05	63.87
map00360	Phenylalanine metabolism	0.520264	TRINITY_DN45841_c0_g1	K00588	EC:2.1.1.104	-3.19035	down	CCOAOMT1	PREDICTED: caffeoyl-CoA O-methyltransferase [Erythranthe guttata]	0.62	5.73	9.92	0.42	0.84	0.76	61	46.79	160.76	15.79	0.24	98.61	3.05	63.87
map00940	Phenylpropanoid biosynthesis	0.0161881	TRINITY_DN39105_c6_g4	K00083	EC:1.1.1.195	-1.70774	down	CAD1	RecName: Full=Cinnamyl alcohol dehydrogenase 1; Short=CAD 1; Short=ObaCAD1	21.74	12.43	11.61	17.6	18.17	7.89	77.85	82.18	98.61	67.4	57.54	67.51	14.91	75.18
map00940	Phenylpropanoid biosynthesis	0.0161881	TRINITY_DN39488_c0_g1	K00083	EC:1.1.1.195	-1.16493	down	CAD1	putative cinnamyl alcohol dehydrogenase [Hibiscus cannabinus]	15.47	5.27	10.52	7.4	5.21	14.7	52.05	68.35	40.57	42.33	37.11	31.47	9.76	45.31
map00940	Phenylpropanoid biosynthesis	0.0161881	TRINITY_DN39488_c1_g2	K00083	EC:1.1.1.195	-2.18972	down	CAD1	cinnamyl alcohol dehydrogenase 1 [Sesamum indicum]	14.16	9.99	5.53	19.28	9.65	4.18	83.32	108.56	93.67	63.82	80.97	58.81	10.46	81.53
map00940	Phenylpropanoid biosynthesis	0.0161881	TRINITY_DN39524_c0_g6	K00083	EC:1.1.1.195	1.02198	up	CAD1	probable mannitol dehydrogenase [Sesamum indicum]	245.21	197.52	113.99	326.5	476.65	261.42	179.17	220.71	147.74	317.8	342.63	140.18	270.21	224.71
map00940	Phenylpropanoid biosynthesis	0.0161881	TRINITY_DN44350_c0_g7	K00083	EC:1.1.1.195	-2.13423	down	CAD1	Alcohol dehydrogenase, class V [Handroanthus impetiginosus]	5.75	4.59	1.67	5.71	2.71	2.08	24.41	29.99	30.61	22.51	39.73	23	3.75	28.38
map00940	Phenylpropanoid biosynthesis	0.0161881	TRINITY_DN37525_c0_g2	K05349	EC:3.2.1.21	-1.54583	down	bglX	uncharacterized protein LOC105164008 isoform X1 [Sesamum indicum]	1.75	1.03	1.06	2.69	1.45	2.12	8.76	5.64	8.76	8.81	8.6	11.62	1.68	8.7
map00940	Phenylpropanoid biosynthesis	0.0161881	TRINITY_DN41988_c0_g1	K05350	EC:3.2.1.21	-1.02136	down	BGLU44	beta-glucosidase 44-like [Sesamum indicum]	11.79	8.57	4.45	21.9	6.21	11.71	33.33	25.49	64.26	20.86	21.98	57.16	10.77	37.18
map00940	Phenylpropanoid biosynthesis	0.0161881	TRINITY_DN50454_c2_g2	K01188	EC:3.2.1.21	4.42089	up	BGLU42	Beta-glucosidase, lactase phlorizinhydrolase [Handroanthus impetiginosus]	7.14	17.46	22.99	3.87	7.43	9.82	1.6	0.64	1.58	1.44	0.49	0.9	11.45	1.11
map00940	Phenylpropanoid biosynthesis	0.0161881	TRINITY_DN38526_c0_g2	K05349	EC:3.2.1.21	1.70556	up	BACOVA_02659	uncharacterized protein LOC105170099 [Sesamum indicum]	4.29	9.57	7.22	1.83	6.62	17.46	1.81	1.43	6.07	1.21	0.15	6.26	7.83	2.82
map00940	Phenylpropanoid biosynthesis	0.0161881	TRINITY_DN38526_c0_g3	K05349	EC:3.2.1.21	-2.27317	down	BACOVA_02659	Glucan 1,3-beta-glucosidase [Handroanthus impetiginosus]	0.69	0.65	1.27	0.33	0.86	0.48	2.26	3.03	14.27	1.76	0.29	20.58	0.71	7.03
map00940	Phenylpropanoid biosynthesis	0.0161881	TRINITY_DN45067_c0_g3	K05349	EC:3.2.1.21	-1.76781	down	BACOVA_02659	uncharacterized protein LOC105173942 [Sesamum indicum]	0.12	0.82	1.35	0.56	0.33	0.68	0.93	1.92	7.98	0.55	1.02	15.15	0.64	4.59
map00940	Phenylpropanoid biosynthesis	0.0161881	TRINITY_DN38817_c1_g5	K06892	EC:1.14.11.-	2.62571	up	At5g05600	PREDICTED: leucoanthocyanidin dioxygenase-like [Erythranthe guttata]	4.09	9.9	8.94	2.34	6.72	18.5	4.81	1.06	1.46	3.61	3.5	2.4	8.41	2.81
map00941	Flavonoid biosynthesis	0.208396	TRINITY_DN44517_c2_g9	K05278	EC:1.14.20.6	-2.85025	down	At5g05600	probable 2-oxoglutarate-dependent dioxygenase At5g05600 [Sesamum indicum]	0.23	1.14	0.83	0.29	0.53	0.1	8.83	7.17	14.42	4.34	2.63	8.26	0.52	7.61
map00360	Phenylalanine metabolism	0.520264	TRINITY_DN39411_c0_g1	K00276	EC:1.4.3.21	4.79363	up	At1g62810	primary amine oxidase [Sesamum indicum]	0.46	0.58	0.28	0.65	5.82	4.09	0.06	0	0.03	0.03	0.03	0.59	1.98	0.12
map00360	Phenylalanine metabolism	0.520264	TRINITY_DN39411_c0_g2	K00276	EC:1.4.3.21	-1.56986	down	At1g62810	Copper amine oxidase [Handroanthus impetiginosus]	3.52	3.94	2.18	4.22	9.19	6.68	29.43	22.97	17.53	26.37	22.98	32.22	4.95	25.25
map00360	Phenylalanine metabolism	0.520264	TRINITY_DN49853_c0_g5	K00276	EC:1.4.3.21	-1.29391	down	At1g62810	primary amine oxidase [Sesamum indicum]	36.09	14.57	3.83	54.33	57.41	13.76	101.71	117.41	138.19	151.95	127.95	68.09	30	117.55
map00940	Phenylpropanoid biosynthesis	0.0161881	TRINITY_DN45165_c1_g1	K00430	EC:1.11.1.7	1.6506	up	At1g21140	vacuolar iron transporter homolog 1-like [Sesamum indicum]	4.57	5.97	1.01	4.2	2.63	2.3	0.83	0.91	0.57	0.41	8.12	0.54	3.45	1.9
map00940	Phenylpropanoid biosynthesis	0.0161881	TRINITY_DN58148_c0_g1	K00430	EC:1.11.1.7	-5.94698	down	At1g21140	vacuolar iron transporter homolog 2-like [Sesamum indicum]	0	0.07	0.08	0.26	0	0	11.88	9.19	11.67	9.52	2.15	4.48	0.07	8.15
map00940	Phenylpropanoid biosynthesis	0.0161881	TRINITY_DN34318_c1_g1	K06892	EC:1.14.11.-	9.4917	up	At1g06620	Iron/ascorbate family oxidoreductase [Handroanthus impetiginosus]	15.15	35.06	21.53	2.58	16.25	31.03	0	0.03	0	0.11	0.07	0.1	20.27	0.05
map00360	Phenylalanine metabolism	0.520264	TRINITY_DN49069_c0_g1	K14455	EC:2.6.1.1	1.21423	up	ASP1	Aspartate aminotransferase/Glutamic oxaloacetic transaminase AAT1/GOT2 [Handroanthus impetiginosus]	31.44	24.51	17.9	32.24	16.45	24.49	20.76	23.54	19.49	23.15	32.64	20.83	24.5	23.4
map00941	Flavonoid biosynthesis	0.208396	TRINITY_DN30994_c0_g1	K05278	EC:1.14.20.6	-1.01022	down	ANT17	probable 2-oxoglutarate-dependent dioxygenase At3g111800, partial [Sesamum indicum]	6.67	4.34	2.2	7.37	5.9	4.01	14.95	16.02	13.86	19.57	23.82	16.45	5.08	17.45
map00941	Flavonoid biosynthesis	0.208396	TRINITY_DN35735_c0_g2	K05278	EC:1.14.20.6	-1.39416	down	ANS	codeine O-demethylase [Sesamum indicum]	123.33	51.62	31.47	95.18	119.46	70.98	337.74	335.2	318.43	509	398.61	296.14	82.01	365.85
map00940	Phenylpropanoid biosynthesis	0.0161881	TRINITY_DN2818_c0_g1	K13065	EC:2.3.1.133	-1.84591	down	ACT	vinorine synthase-like [Sesamum indicum]	4.13	3.96	1.25	8.12	1.66	2.41	29.34	17.59	31.04	31	6.29	16.72	3.59	22
map00941	Flavonoid biosynthesis	0.208396	TRINITY_DN2818_c0_g1	K13065	EC:2.3.1.133	-1.84591	down	ACT	vinorine synthase-like [Sesamum indicum]	4.13	3.96	1.25	8.12	1.66	2.41	29.34	17.59	31.04	31	6.29	16.72	3.59	22
map00940	Phenylpropanoid biosynthesis	0.0161881	TRINITY_DN50481_c0_g1	K13065	EC:2.3.1.133	-1.89995	down	ACT	vinorine synthase-like [Hevea brasiliensis]	0.56	0.41	0.04	0.04	0.6	0.16	2.27	2.11	2.67	1.94	1.98	0.8	0.3	1.96
map00941	Flavonoid biosynthesis	0.208396	TRINITY_DN50481_c0_g1	K13065	EC:2.3.1.133	-1.89995	down	ACT	vinorine synthase-like [Hevea brasiliensis]	0.56	0.41	0.04	0.04	0.6	0.16	2.27	2.11	2.67	1.94	1.98	0.8	0.3	1.96
map00940	Phenylpropanoid biosynthesis	0.0161881	TRINITY_DN41490_c1_g12	K01904	EC:6.2.1.12	4.54196	up	4CLL7	LOW QUALITY PROTEIN: 4-coumarate--CoA ligase-like 7 [Sesamum indicum]	15.3	51.56	29.98	11.42	44.01	44.77	2.6	3.65	1.37	2.64	3.24	2.46	32.84	2.66
map00360	Phenylalanine metabolism	0.520264	TRINITY_DN41490_c1_g12	K01904	EC:6.2.1.12	4.54196	up	4CLL7	LOW QUALITY PROTEIN: 4-coumarate--CoA ligase-like 7 [Sesamum indicum]	15.3	51.56	29.98	11.42	44.01	44.77	2.6	3.65	1.37	2.64	3.24	2.46	32.84	2.66
map00940	Phenylpropanoid biosynthesis	0.0161881	TRINITY_DN41490_c1_g2	K01904	EC:6.2.1.12	1.54927	up	4CLL7	Acyl-CoA synthetase [Handroanthus impetiginosus]	30.49	31.99	39.04	33.83	44.17	57.09	24.82	21.32	24.75	26.21	17.6	27.73	39.43	23.74
map00360	Phenylalanine metabolism	0.520264	TRINITY_DN41490_c1_g2	K01904	EC:6.2.1.12	1.54927	up	4CLL7	Acyl-CoA synthetase [Handroanthus impetiginosus]	30.49	31.99	39.04	33.83	44.17	57.09	24.82	21.32	24.75	26.21	17.6	27.73	39.43	23.74
map00940	Phenylpropanoid biosynthesis	0.0161881	TRINITY_DN51114_c0_g2	K01904	EC:6.2.1.12	1.66528	up	4CLL6	4-coumarate--CoA ligase-like 6 [Sesamum indicum]	4.35	6.83	12.31	7.35	10.45	14.2	2.38	1.07	2.28	1.22	7.21	1.43	9.25	2.6
map00360	Phenylalanine metabolism	0.520264	TRINITY_DN51114_c0_g2	K01904	EC:6.2.1.12	1.66528	up	4CLL6	4-coumarate--CoA ligase-like 6 [Sesamum indicum]	4.35	6.83	12.31	7.35	10.45	14.2	2.38	1.07	2.28	1.22	7.21	1.43	9.25	2.6
map00940	Phenylpropanoid biosynthesis	0.0161881	TRINITY_DN51353_c1_g1	K01904	EC:6.2.1.12	-2.25182	down	4CL1	4-coumarate coenzyme A ligase [Paulownia fortunei]	4.27	10.54	7.12	3.29	7.67	4.31	63.42	79.6	79.37	54.47	4.51	46.1	6.2	54.58
map00360	Phenylalanine metabolism	0.520264	TRINITY_DN51353_c1_g1	K01904	EC:6.2.1.12	-2.25182	down	4CL1	4-coumarate coenzyme A ligase [Paulownia fortunei]	4.27	10.54	7.12	3.29	7.67	4.31	63.42	79.6	79.37	54.47	4.51	46.1	6.2	54.58
map00940	Phenylpropanoid biosynthesis	0.0161881	TRINITY_DN40229_c0_g4	K00083	EC:1.1.1.195	3.26775	up	10HGO	uncharacterized protein LOC105165970 [Sesamum indicum]	26.93	26.23	30.38	9.14	20.89	53.64	9.06	6.42	0.63	4.46	5.34	6.29	27.87	5.37
map00940	Phenylpropanoid biosynthesis	0.0161881	TRINITY_DN40229_c0_g6	K00083	EC:1.1.1.195	5.69953	up	10HGO	Alcohol dehydrogenase, class V [Handroanthus impetiginosus]	0.1	2.03	2.24	0.23	0.85	5.03	0.15	0	0.15	0.05	0	0	1.75	0.06
map00360	Phenylalanine metabolism	0.520264	TRINITY_DN23969_c0_g1	K01593	EC:4.1.1.28 4.1.1.105	-5.59496	down	-	hypothetical protein MIMGU_mgv1a021638mg [Erythranthe guttata]	0.09	0	0	0	0	0	1.61	0.87	0	0.99	1.22	4.2	0.01	1.48
map00360	Phenylalanine metabolism	0.520264	TRINITY_DN31850_c0_g1	K01593	EC:4.1.1.28 4.1.1.105	-2.87527	down	-	PREDICTED: uncharacterized protein LOC105961745 [Erythranthe guttata]	0.87	0.59	1.33	0	0.42	0.1	8.65	2.61	3.46	7.91	3.34	8.68	0.55	5.77
map00940	Phenylpropanoid biosynthesis	0.0161881	TRINITY_DN40167_c0_g3	K00430	EC:1.11.1.7	9.9883	up	-	lignin-forming anionic peroxidase-like [Sesamum indicum]	3.58	35.86	38.4	1.27	15.41	22.75	0.15	0	0	0.08	0	0.04	19.54	0.04
map00940	Phenylpropanoid biosynthesis	0.0161881	TRINITY_DN40684_c2_g1	K13065	EC:2.3.1.133	4.15934	up	-	spermidine hydroxycinnamoyl transferase [Sesamum indicum]	37.22	36.13	23.12	63.09	20.57	33.5	2.98	3.05	2.58	3.55	5.12	3.8	35.6	3.51
map00941	Flavonoid biosynthesis	0.208396	TRINITY_DN40684_c2_g1	K13065	EC:2.3.1.133	4.15934	up	-	spermidine hydroxycinnamoyl transferase [Sesamum indicum]	37.22	36.13	23.12	63.09	20.57	33.5	2.98	3.05	2.58	3.55	5.12	3.8	35.6	3.51
map00360	Phenylalanine metabolism	0.520264	TRINITY_DN40980_c0_g1	K01426	EC:3.5.1.4	4.35407	up	-	uncharacterized protein LOC105161921 isoform X2 [Sesamum indicum]	0.51	2.59	13.78	1.6	0.98	3.05	0.3	0.36	1.74	0.06	0	0.55	3.75	0.5
map00940	Phenylpropanoid biosynthesis	0.0161881	TRINITY_DN41544_c0_g10	K00430	EC:1.11.1.7	-1.16251	down	-	cytochrome b-c1 complex subunit 8 [Sesamum indicum]	8.76	6.32	9.02	8.39	4.76	5.55	31.9	22.81	31.99	25.29	30.69	36.91	7.13	29.93
map00360	Phenylalanine metabolism	0.520264	TRINITY_DN41966_c0_g2	K00276	EC:1.4.3.21	-1.22821	down	-	uncharacterized protein LOC105179376 [Sesamum indicum]	2.66	2.11	3.58	3.6	0.89	3.1	11.73	12.18	14.2	11.15	18.94	15.8	2.66	14
map00940	Phenylpropanoid biosynthesis	0.0161881	TRINITY_DN43045_c4_g2	K00430	EC:1.11.1.7	8.31176	up	-	lignin-forming anionic peroxidase-like [Sesamum indicum]	1.96	4.41	4.61	2.19	2.68	3.37	0	0	0.04	0	0	0.04	3.2	0.01
map00940	Phenylpropanoid biosynthesis	0.0161881	TRINITY_DN45275_c1_g1	K00430	EC:1.11.1.7	5.5773	up	-	hypothetical protein CDL12_28560 [Handroanthus impetiginosus]	1.54	1.65	0.25	7.86	0.92	1.08	0	0.04	0.08	0	0.08	0.21	2.22	0.07
map00360	Phenylalanine metabolism	0.520264	TRINITY_DN45275_c1_g5	K00276	EC:1.4.3.21	3.02706	up	-	uncharacterized protein LOC105178162 [Sesamum indicum]	12.72	36.75	37.51	11.99	27.17	22.61	5.85	4.38	6.11	6.5	3.8	8.63	24.79	5.88
map00940	Phenylpropanoid biosynthesis	0.0161881	TRINITY_DN45744_c3_g6	K01904	EC:6.2.1.12	-1.42339	down	-	4-coumarate--CoA ligase 2 [Sesamum indicum]	49.05	21.69	22.8	40.83	28.98	26.15	148.7	143.49	182.2	159.43	144.04	213.45	31.58	165.22
map00360	Phenylalanine metabolism	0.520264	TRINITY_DN45744_c3_g6	K01904	EC:6.2.1.12	-1.42339	down	-	4-coumarate--CoA ligase 2 [Sesamum indicum]	49.05	21.69	22.8	40.83	28.98	26.15	148.7	143.49	182.2	159.43	144.04	213.45	31.58	165.22
map00940	Phenylpropanoid biosynthesis	0.0161881	TRINITY_DN46009_c2_g13	K13065	EC:2.3.1.133	-2.03736	down	-	uncharacterized protein LOC105168421 isoform X3 [Sesamum indicum]	3.59	2.04	1.97	3.67	3.02	1.75	21.25	13.26	24.12	18.4	17.99	21.36	2.67	19.4
map00941	Flavonoid biosynthesis	0.208396	TRINITY_DN46009_c2_g13	K13065	EC:2.3.1.133	-2.03736	down	-	uncharacterized protein LOC105168421 isoform X3 [Sesamum indicum]	3.59	2.04	1.97	3.67	3.02	1.75	21.25	13.26	24.12	18.4	17.99	21.36	2.67	19.4
map00940	Phenylpropanoid biosynthesis	0.0161881	TRINITY_DN46009_c2_g5	K13065	EC:2.3.1.133	-1.13202	down	-	uncharacterized protein LOC105168421 isoform X3 [Sesamum indicum]	5.48	3.13	3.62	5.93	6.24	4.6	16.97	19.02	24.84	18.48	19.01	21.11	4.83	19.91
map00941	Flavonoid biosynthesis	0.208396	TRINITY_DN46009_c2_g5	K13065	EC:2.3.1.133	-1.13202	down	-	uncharacterized protein LOC105168421 isoform X3 [Sesamum indicum]	5.48	3.13	3.62	5.93	6.24	4.6	16.97	19.02	24.84	18.48	19.01	21.11	4.83	19.91
map00360	Phenylalanine metabolism	0.520264	TRINITY_DN46924_c2_g10	K00276	EC:1.4.3.21	4.44485	up	-	uncharacterized protein LOC105179378 [Sesamum indicum]	5.85	16.52	18.76	6.5	12.71	13.66	1.1	0.74	0.71	1.09	1.18	1.96	12.33	1.13
map00360	Phenylalanine metabolism	0.520264	TRINITY_DN56105_c0_g5	K01593	EC:4.1.1.28 4.1.1.105	-1.1089	down	-	PREDICTED: uncharacterized protein LOC105964381 [Erythranthe guttata]	9.86	4.38	2.67	7.97	7.38	7.76	23.69	17.64	25.69	24.52	25.48	25.46	6.67	23.75
map00940	Phenylpropanoid biosynthesis	0.0161881	TRINITY_DN644_c0_g1	K00487	EC:1.14.13.11	-5.21414	down	-	Cytochrome P450 CYP2 subfamily [Handroanthus impetiginosus]	0	0.07	0	0	0	0.04	0.03	0.07	1.72	0.03	0.03	6.7	0.02	1.43
map00941	Flavonoid biosynthesis	0.208396	TRINITY_DN644_c0_g1	K00487	EC:1.14.13.11	-5.21414	down	-	Cytochrome P450 CYP2 subfamily [Handroanthus impetiginosus]	0	0.07	0	0	0	0.04	0.03	0.07	1.72	0.03	0.03	6.7	0.02	1.43
map00360	Phenylalanine metabolism	0.520264	TRINITY_DN644_c0_g1	K00487	EC:1.14.13.11	-5.21414	down	-	Cytochrome P450 CYP2 subfamily [Handroanthus impetiginosus]	0	0.07	0	0	0	0.04	0.03	0.07	1.72	0.03	0.03	6.7	0.02	1.43
